# Supplementary material for: An annotated cDNA library and microarray for large-scale gene-expression studies in the ant Solenopsis invicta
Source: Genome Biol. 2007 Jan 15;8(1):R9. doi: 10.1186/gb-2007-8-1-r9 (PMC1839134; doi:10.1186/gb-2007-8-1-r9)
Supplement: Additional data file 1 — Honey bee sequences similar to fire ant assembled sequences with a non-honey bee best hit [file gb-2007-8-1-r9-S1.xls]

## Sheet: Sheet1
Addititional data file 1: Honey bee sequences similar to fire ant assembled sequences with a non-honey bee best hit
For 1,483 fire ant assembled sequences, the best nr blastx hit (E-score ≤ 1e-5) was a non-honey bee match.
These sequences were compared to the honey bee genome assembly version 4.0 and the honey bee Official Gene Set using blast analyses (E-score ≤ 1e-5).
Additionally, from the original blastx comparison to the nr database (21 April 2006), the best honey bee hit (E-score ≤ 1e-5), if any, was identified along with its hit “rank”.
Fire ant assembled sequences similar to bacterial, viral or protozoan genes were not included.
(#) Because the cached blastx output was limited to 20 hits, significant similarity to honey bee genes may have been missed if they were ranked below 20.
(*) Fire ant assembled sequences were classified into three categories based on their best hit to the nr database:
metazoan and non-hymenopteran (M; 1341 sequences); ant (A; 106 sequences); and hymenopteran, non-honey bee, non-ant (H; 36 sequences)
	blastx Official Gene Set		tblastx		blastn			blastx nr
Fire ant assembled sequence	OGD protein ID	OGS blastx E-score	honeybee assembly 4.0 chromosome	tblastx E-score	honeybee assembly 4.0 ID	honeybee assembly 4.0 chr location	blastn E-score	honeybee hit ID	honeybee hit description	nr blastx E-score	rank in cached nr blastx output (#)	category (*)
SI.CL.12.cl.1209.Contig1	gnl|Amel|GB18960-PA	0	chr|NC_007070|NC_007070.2 Chromosome LG1; [Apis mellifera] gi:110825701 chromosome 1 complete sequence	5.18e-145	chr|AMe_AADG05000567|AMe_AADG05000567.1	Linkage group 1; [Apis mellifera] draft genome, Amel_4.0.	2e-32	ens|ENSAPMP00000026922	pep:novel group:AMEL2.0:GroupUn:58996912:58998319:1 gene:ENSAPMG00000015488 transcript:ENSAPMT00000026921	1e-108	17	M
SI.CL.31.cl.3184.Contig1	gnl|Amel|GB16748-PA	1e-172	chr|NC_007085|NC_007085.2 Chromosome LG16; [Apis mellifera] gi:110825765 chromosome 16 complete sequence	2.83e-68	chr|AMe_AADG05007140|AMe_AADG05007140.1	Linkage group 16; [Apis mellifera] draft genome, Amel_4.0.	3e-31	ens|ENSAPMP00000011789	pep:novel group:AMEL2.0:GroupUn:20298715:20299973:-1 gene:ENSAPMG00000006778 transcript:ENSAPMT00000011789	7e-91	5	M
SI.CL.36.cl.3679.Contig1	gnl|Amel|GB13043-PA	1e-171	chr|NC_007079|NC_007079.2 Chromosome LG10; [Apis mellifera] gi:110825711 chromosome 10 complete sequence	2.3e-132	chr|AMe_AADG05003736|AMe_AADG05003736.1	Linkage group 10; [Apis mellifera] draft genome, Amel_4.0.	4e-40	ens|ENSAPMP00000005129	pep:novel group:AMEL2.0:Group10:404051:404817:1 gene:ENSAPMG00000002942 transcript:ENSAPMT00000005129	2e-72	3	M
SI.CL.25.cl.2534.Contig1	gnl|Amel|GB12420-PA	1e-165	chr|NC_007083|NC_007083.2 Chromosome LG14; [Apis mellifera] gi:110825763 chromosome 14 complete sequence	2.96e-15	chr|AMe_AADG05006699|AMe_AADG05006699.1	Linkage group Un; [Apis mellifera] draft genome, Amel_4.0.	1e-33	--	--	--	--	M
SI.CL.21.cl.2194.Contig1	gnl|Amel|GB18636-PA	1e-161	chr|NC_007077|NC_007077.2 Chromosome LG8; [Apis mellifera] gi:110825772 chromosome 8 complete sequence	1.32e-130	chr|AMe_AADG05006756|AMe_AADG05006756.1	Linkage group 8; [Apis mellifera] draft genome, Amel_4.0.	5e-36	--	--	--	--	M
SI.CL.29.cl.2902.Contig1	gnl|Amel|GB14798-PA	1e-155	chr|NC_007079|NC_007079.2 Chromosome LG10; [Apis mellifera] gi:110825711 chromosome 10 complete sequence	1.93e-170	chr|AMe_AADG05003823|AMe_AADG05003823.1	Linkage group 10; [Apis mellifera] draft genome, Amel_4.0.	2e-11	ens|ENSAPMP00000020086	pep:novel group:AMEL2.0:Group10:2064694:2066147:-1 gene:ENSAPMG00000004349 transcript:ENSAPMT00000020081	1e-154	8	M
SI.CL.6.cl.608.Contig1	gnl|Amel|GB10315-PA	1e-145	chr|NC_007070|NC_007070.2 Chromosome LG1; [Apis mellifera] gi:110825701 chromosome 1 complete sequence	2.41e-131	chr|AMe_AADG05000746|AMe_AADG05000746.1	Linkage group 1; [Apis mellifera] draft genome, Amel_4.0.	1e-31	--	--	--	--	M
SI.CL.5.cl.505.Contig1	gnl|Amel|GB17471-PA	1e-144	chr|NC_007070|NC_007070.2 Chromosome LG1; [Apis mellifera] gi:110825701 chromosome 1 complete sequence	1.5e-130	chr|AMe_AADG05006469|AMe_AADG05006469.1	Linkage group 1; [Apis mellifera] draft genome, Amel_4.0.	4e-49	--	--	--	--	M
SI.CL.9.cl.938.Contig1	gnl|Amel|GB20070-PA	1e-136	chr|NC_007077|NC_007077.2 Chromosome LG8; [Apis mellifera] gi:110825772 chromosome 8 complete sequence	5.84e-150	chr|AMe_AADG05008174|AMe_AADG05008174.1	Linkage group 6; [Apis mellifera] draft genome, Amel_4.0.	2e-08	ens|ENSAPMP00000014374	pep:known group:AMEL2.0:Group8:3473725:3475525:1 gene:ENSAPMG00000008207 transcript:ENSAPMT00000014374	1e-134	5	M
SI.CL.25.cl.2553.Contig1	gnl|Amel|GB12111-PA	1e-135	chr|NC_007077|NC_007077.2 Chromosome LG8; [Apis mellifera] gi:110825772 chromosome 8 complete sequence	5.42e-139	chr|AMe_AADG05007749|AMe_AADG05007749.1	Linkage group 8; [Apis mellifera] draft genome, Amel_4.0.	2e-13	--	--	--	--	M
SiJWA03AAE.tag5_A03_01.scf	gnl|Amel|GB12049-PA	1e-134	chr|NC_007070|NC_007070.2 Chromosome LG1; [Apis mellifera] gi:110825701 chromosome 1 complete sequence	7.38e-06	chr|AMe_AADG05006962|AMe_AADG05006962.1	Linkage group Un; [Apis mellifera] draft genome, Amel_4.0.	9e-25	ens|ENSAPMP00000034841	pep:novel group:AMEL2.0:GroupUn:127475418:127480988:1 gene:ENSAPMG00000013636 transcript:ENSAPMT00000034841	1e-127	3	M
SiJWG01BAR.scf	gnl|Amel|GB18527-PA	1e-132	chr|NC_007074|NC_007074.2 Chromosome LG5; [Apis mellifera] gi:110825769 chromosome 5 complete sequence	1.9e-157	chr|AMe_AADG05002202|AMe_AADG05002202.1	Linkage group 5; [Apis mellifera] draft genome, Amel_4.0.	1e-180	--	--	--	--	M
SI.CL.41.cl.4109.Contig1	gnl|Amel|GB14980-PA	1e-130	chr|NC_007072|NC_007072.2 Chromosome LG3; [Apis mellifera] gi:110825767 chromosome 3 complete sequence	9.17e-77	chr|AMe_AADG05001225|AMe_AADG05001225.1	Linkage group 3; [Apis mellifera] draft genome, Amel_4.0.	6e-30	ens|ENSAPMP00000019971	pep:novel group:AMEL2.0:Group3:1002042:1002823:1 gene:ENSAPMG00000002189 transcript:ENSAPMT00000019966	3e-71	7	M
SI.CL.11.cl.1127.Contig1	gnl|Amel|GB13416-PA	1e-129	chr|NC_007070|NC_007070.2 Chromosome LG1; [Apis mellifera] gi:110825701 chromosome 1 complete sequence	5.38e-142	chr|AMe_AADG05000399|AMe_AADG05000399.1	Linkage group 1; [Apis mellifera] draft genome, Amel_4.0.	7e-41	ens|ENSAPMP00000033850	pep:known group:AMEL2.0:Group1:11283060:11283629:-1 gene:ENSAPMG00000010188 transcript:ENSAPMT00000033849	5e-69	19	M
SI.CL.17.cl.1752.Contig1	gnl|Amel|GB12630-PA	1e-128	chr|NC_007074|NC_007074.2 Chromosome LG5; [Apis mellifera] gi:110825769 chromosome 5 complete sequence	2.56e-109	chr|AMe_AADG05002202|AMe_AADG05002202.1	Linkage group 5; [Apis mellifera] draft genome, Amel_4.0.	6e-38	--	--	--	--	M
SI.CL.11.cl.1170.Contig1	gnl|Amel|GB13368-PA	1e-128	chr|NC_007081|NC_007081.2 Chromosome LG12; [Apis mellifera] gi:110825756 chromosome 12 complete sequence	2.65e-49	chr|AMe_AADG05004570|AMe_AADG05004570.1	Linkage group 12; [Apis mellifera] draft genome, Amel_4.0.	1e-05	--	--	--	--	M
SI.CL.27.cl.2700.Contig1	gnl|Amel|GB14056-PA	1e-127	chr|NC_007084|NC_007084.2 Chromosome LG15; [Apis mellifera] gi:110825764 chromosome 15 complete sequence	6.15e-73	chr|AMe_AADG05005340|AMe_AADG05005340.1	Linkage group 15; [Apis mellifera] draft genome, Amel_4.0.	2e-22	--	--	--	--	M
SiJWH07BBM2.scf	gnl|Amel|GB12569-PA	1e-126	chr|NC_007073|NC_007073.2 Chromosome LG4; [Apis mellifera] gi:110825768 chromosome 4 complete sequence	6.28e-143	chr|AMe_AADG05001592|AMe_AADG05001592.1	Linkage group 4; [Apis mellifera] draft genome, Amel_4.0.	2e-59	--	--	--	--	M
SI.CL.0.cl.055.Contig1	gnl|Amel|GB13421-PA	1e-126	chr|NC_007073|NC_007073.2 Chromosome LG4; [Apis mellifera] gi:110825768 chromosome 4 complete sequence	4.54e-101	chr|AMe_AADG05006441|AMe_AADG05006441.1	Linkage group 4; [Apis mellifera] draft genome, Amel_4.0.	4e-36	--	--	--	--	M
SI.CL.13.cl.1338.Contig1	gnl|Amel|GB19365-PA	1e-125	chr|NC_007070|NC_007070.2 Chromosome LG1; [Apis mellifera] gi:110825701 chromosome 1 complete sequence	3.96e-148	chr|AMe_AADG05002318|AMe_AADG05002318.1	Linkage group 6; [Apis mellifera] draft genome, Amel_4.0.	2e-62	ens|ENSAPMP00000034041	pep:novel group:AMEL2.0:Group1:23542415:23546228:1 gene:ENSAPMG00000012333 transcript:ENSAPMT00000034040	1e-123	3	M
SiJWA04ACH.scf	gnl|Amel|GB13977-PA	1e-125	chr|NC_007080|NC_007080.2 Chromosome LG11; [Apis mellifera] gi:110825732 chromosome 11 complete sequence	4.15e-138	chr|AMe_AADG05004147|AMe_AADG05004147.1	Linkage group 11; [Apis mellifera] draft genome, Amel_4.0.	3e-18	--	--	--	--	M
SiJWH09BCL2.scf	gnl|Amel|GB15420-PA	1e-123	chr|NC_007080|NC_007080.2 Chromosome LG11; [Apis mellifera] gi:110825732 chromosome 11 complete sequence	3.95e-132	chr|AMe_AADG05004236|AMe_AADG05004236.1	Linkage group 11; [Apis mellifera] draft genome, Amel_4.0.	1e-17	ens|ENSAPMP00000001036	pep:novel group:AMEL2.0:Group11:4073399:4081088:-1 gene:ENSAPMG00000000642 transcript:ENSAPMT00000001036	6e-32	17	M
SI.CL.17.cl.1718.Contig1	gnl|Amel|GB18312-PA	1e-123	chr|NC_007082|NC_007082.2 Chromosome LG13; [Apis mellifera] gi:110825762 chromosome 13 complete sequence	1.92e-59	--	--	--	tr|Q9U8X5|Q9U8X5_APIME	Amylase.[Apis mellifera]	1e-121	2	M
SI.CL.20.cl.2046.Contig1	gnl|Amel|GB11663-PA	1e-122	chr|NC_007083|NC_007083.2 Chromosome LG14; [Apis mellifera] gi:110825763 chromosome 14 complete sequence	3.99e-125	chr|AMe_AADG05005050|AMe_AADG05005050.1	Linkage group 14; [Apis mellifera] draft genome, Amel_4.0.	8e-25	--	--	--	--	M
SI.CL.9.cl.918.Contig1	gnl|Amel|GB18846-PA	1e-121	chr|NC_007074|NC_007074.2 Chromosome LG5; [Apis mellifera] gi:110825769 chromosome 5 complete sequence	4.47e-128	chr|AMe_AADG05002027|AMe_AADG05002027.1	Linkage group 5; [Apis mellifera] draft genome, Amel_4.0.	2e-07	--	--	--	--	M
SI.CL.0.cl.019.Contig1	gnl|Amel|GB10796-PA	1e-121	chr|NC_007080|NC_007080.2 Chromosome LG11; [Apis mellifera] gi:110825732 chromosome 11 complete sequence	3.19e-122	chr|AMe_AADG05004121|AMe_AADG05004121.1	Linkage group 11; [Apis mellifera] draft genome, Amel_4.0.	6e-44	--	--	--	--	M
SI.CL.7.cl.770.Contig1	gnl|Amel|GB18326-PA	1e-120	chr|NC_007077|NC_007077.2 Chromosome LG8; [Apis mellifera] gi:110825772 chromosome 8 complete sequence	6.62e-125	--	--	--	--	--	--	--	M
SI.CL.21.cl.2162.Contig1	gnl|Amel|GB12521-PA	1e-120	chr|NC_007078|NC_007078.2 Chromosome LG9; [Apis mellifera] gi:110825774 chromosome 9 complete sequence	1.19e-85	chr|AMe_AADG05003619|AMe_AADG05003619.1	Linkage group 9; [Apis mellifera] draft genome, Amel_4.0.	1e-08	--	--	--	--	M
SiJWD08BAP.scf	gnl|Amel|GB17469-PA	1e-119	chr|NC_007073|NC_007073.2 Chromosome LG4; [Apis mellifera] gi:110825768 chromosome 4 complete sequence	2.03e-134	--	--	--	--	--	--	--	M
SiJWB12CAM2.scf	gnl|Amel|GB10590-PA	1e-119	chr|NC_007071|NC_007071.2 Chromosome LG2; [Apis mellifera] gi:110825766 chromosome 2 complete sequence	1.53e-125	chr|AMe_AADG05007691|AMe_AADG05007691.1	Linkage group 2; [Apis mellifera] draft genome, Amel_4.0.	6e-35	ens|ENSAPMP00000033168	pep:novel group:AMEL2.0:GroupUn:26536149:26538089:1 gene:ENSAPMG00000016483 transcript:ENSAPMT00000033168	3e-80	6	M
SiJWB12AAJ.scf	gnl|Amel|GB16944-PA	1e-119	chr|NC_007084|NC_007084.2 Chromosome LG15; [Apis mellifera] gi:110825764 chromosome 15 complete sequence	2.11e-125	chr|AMe_AADG05005447|AMe_AADG05005447.1	Linkage group 15; [Apis mellifera] draft genome, Amel_4.0.	1e-29	--	--	--	--	M
SiJWD09ADP.scf	gnl|Amel|GB11646-PA	1e-119	chr|NC_007083|NC_007083.2 Chromosome LG14; [Apis mellifera] gi:110825763 chromosome 14 complete sequence	7.45e-123	chr|AMe_AADG05005867|AMe_AADG05005867.1	Linkage group 14; [Apis mellifera] draft genome, Amel_4.0.	7e-25	--	--	--	--	M
SI.CL.41.cl.4169.Contig1	gnl|Amel|GB15989-PA	1e-119	chr|NC_007083|NC_007083.2 Chromosome LG14; [Apis mellifera] gi:110825763 chromosome 14 complete sequence	2.65e-79	chr|AMe_AADG05005130|AMe_AADG05005130.1	Linkage group 14; [Apis mellifera] draft genome, Amel_4.0.	2e-31	--	--	--	--	M
SI.CL.42.cl.4297.Contig1	gnl|Amel|GB10100-PA	1e-119	chr|NC_007074|NC_007074.2 Chromosome LG5; [Apis mellifera] gi:110825769 chromosome 5 complete sequence	1.52e-62	--	--	--	--	--	--	--	M
SI.CL.40.cl.4023.Contig1	gnl|Amel|GB12178-PA	1e-119	chr|NC_007079|NC_007079.2 Chromosome LG10; [Apis mellifera] gi:110825711 chromosome 10 complete sequence	4.56e-41	--	--	--	--	--	--	--	M
SI.CL.24.cl.2429.Contig1	gnl|Amel|GB10390-PA	1e-118	chr|NC_007076|NC_007076.2 Chromosome LG7; [Apis mellifera] gi:110825771 chromosome 7 complete sequence	8.92e-127	chr|AMe_AADG05002929|AMe_AADG05002929.1	Linkage group 7; [Apis mellifera] draft genome, Amel_4.0.	7e-19	--	--	--	--	M
SI.CL.33.cl.3306.Contig1	gnl|Amel|GB17612-PA	1e-118	chr|NC_007071|NC_007071.2 Chromosome LG2; [Apis mellifera] gi:110825766 chromosome 2 complete sequence	2.73e-122	chr|AMe_AADG05003581|AMe_AADG05003581.1	Linkage group 9; [Apis mellifera] draft genome, Amel_4.0.	6e-56	--	--	--	--	M
SiJWC06ADP.scf	gnl|Amel|GB12251-PA	1e-118	chr|NC_007074|NC_007074.2 Chromosome LG5; [Apis mellifera] gi:110825769 chromosome 5 complete sequence	2.98e-82	chr|AMe_AADG05001931|AMe_AADG05001931.1	Linkage group 5; [Apis mellifera] draft genome, Amel_4.0.	3e-21	ens|ENSAPMP00000001576	pep:novel group:AMEL2.0:Group5:4113155:4113778:-1 gene:ENSAPMG00000000936 transcript:ENSAPMT00000001576	2e-18	15	M
SI.CL.17.cl.1760.Contig1	gnl|Amel|GB12510-PA	1e-118	chr|NC_007080|NC_007080.2 Chromosome LG11; [Apis mellifera] gi:110825732 chromosome 11 complete sequence	4.05e-21	chr|AMe_AADG05003996|AMe_AADG05003996.1	Linkage group 10; [Apis mellifera] draft genome, Amel_4.0.	2e-10	--	--	--	--	M
SiJWH05BCP2.scf	gnl|Amel|GB10290-PA	1e-117	chr|NC_007080|NC_007080.2 Chromosome LG11; [Apis mellifera] gi:110825732 chromosome 11 complete sequence	1.99e-113	chr|AMe_AADG05004121|AMe_AADG05004121.1	Linkage group 11; [Apis mellifera] draft genome, Amel_4.0.	2e-31	--	--	--	--	M
SI.CL.40.cl.4019.Contig1	gnl|Amel|GB13071-PA	1e-116	chr|NC_007080|NC_007080.2 Chromosome LG11; [Apis mellifera] gi:110825732 chromosome 11 complete sequence	3.12e-122	chr|AMe_AADG05004103|AMe_AADG05004103.1	Linkage group 11; [Apis mellifera] draft genome, Amel_4.0.	5e-23	--	--	--	--	M
SI.CL.2.cl.284.Contig1	gnl|Amel|GB17553-PA	1e-116	chr|NC_007083|NC_007083.2 Chromosome LG14; [Apis mellifera] gi:110825763 chromosome 14 complete sequence	1.26e-40	chr|AMe_AADG05005059|AMe_AADG05005059.1	Linkage group 14; [Apis mellifera] draft genome, Amel_4.0.	4e-45	--	--	--	--	M
SiJWG11AA1.tag5_G11_13.scf	gnl|Amel|GB12173-PA	1e-115	chr|NC_007079|NC_007079.2 Chromosome LG10; [Apis mellifera] gi:110825711 chromosome 10 complete sequence	6.7e-90	chr|AMe_AADG05003908|AMe_AADG05003908.1	Linkage group 10; [Apis mellifera] draft genome, Amel_4.0.	6e-20	--	--	--	--	M
SiJWG09ABI.scf	gnl|Amel|GB12246-PA	1e-114	chr|NC_007083|NC_007083.2 Chromosome LG14; [Apis mellifera] gi:110825763 chromosome 14 complete sequence	2.92e-99	chr|AMe_AADG05005063|AMe_AADG05005063.1	Linkage group 14; [Apis mellifera] draft genome, Amel_4.0.	4e-36	--	--	--	--	M
SI.CL.1.cl.196.Contig1	gnl|Amel|GB17280-PA	1e-114	chr|NC_007078|NC_007078.2 Chromosome LG9; [Apis mellifera] gi:110825774 chromosome 9 complete sequence	2.88e-15	chr|AMe_AADG05006051|AMe_AADG05006051.1	Linkage group Un; [Apis mellifera] draft genome, Amel_4.0.	6e-14	--	--	--	--	M
SI.CL.24.cl.2490.Contig1	gnl|Amel|GB11887-PA	1e-113	chr|NC_007075|NC_007075.2 Chromosome LG6; [Apis mellifera] gi:110825770 chromosome 6 complete sequence	2.14e-105	chr|AMe_AADG05005795|AMe_AADG05005795.1	Linkage group 6; [Apis mellifera] draft genome, Amel_4.0.	3e-12	ens|ENSAPMP00000020057	pep:novel group:AMEL2.0:GroupUn:9337089:9338103:-1 gene:ENSAPMG00000014842 transcript:ENSAPMT00000020052	2e-60	4	M
SI.CL.4.cl.410.Contig1	gnl|Amel|GB14055-PA	1e-113	chr|NC_007070|NC_007070.2 Chromosome LG1; [Apis mellifera] gi:110825701 chromosome 1 complete sequence	1.25e-94	chr|AMe_AADG05006438|AMe_AADG05006438.1	Linkage group 1; [Apis mellifera] draft genome, Amel_4.0.	3e-36	ens|ENSAPMP00000015566	pep:novel group:AMEL2.0:GroupUn:62197390:62198086:1 gene:ENSAPMG00000008903 transcript:ENSAPMT00000015566	4e-72	9	M
SiJWC06ADI.scf	gnl|Amel|GB13082-PA	1e-113	--	--	chr|AMe_AADG05007475|AMe_AADG05007475.1	Linkage group Un; [Apis mellifera] draft genome, Amel_4.0.	1e-08	--	--	--	--	M
SiJWE05BBV2.scf	gnl|Amel|GB16593-PA	1e-112	chr|NC_007079|NC_007079.2 Chromosome LG10; [Apis mellifera] gi:110825711 chromosome 10 complete sequence	7.2e-121	chr|AMe_AADG05003867|AMe_AADG05003867.1	Linkage group 10; [Apis mellifera] draft genome, Amel_4.0.	1e-42	--	--	--	--	M
SI.CL.13.cl.1367.Contig1	gnl|Amel|GB12504-PA	1e-112	chr|NC_007072|NC_007072.2 Chromosome LG3; [Apis mellifera] gi:110825767 chromosome 3 complete sequence	1.06e-88	chr|AMe_AADG05001505|AMe_AADG05001505.1	Linkage group 3; [Apis mellifera] draft genome, Amel_4.0.	1e-58	ens|ENSAPMP00000004047	pep:known group:AMEL2.0:Group3:10645984:10647569:-1 gene:ENSAPMG00000002348 transcript:ENSAPMT00000004047	1e-104	2	M
SI.CL.18.cl.1865.Contig1	gnl|Amel|GB11284-PA	1e-112	chr|NC_007074|NC_007074.2 Chromosome LG5; [Apis mellifera] gi:110825769 chromosome 5 complete sequence	1.31e-28	chr|AMe_AADG05008790|AMe_AADG05008790.1	Linkage group Un; [Apis mellifera] draft genome, Amel_4.0.	1e-29	--	--	--	--	M
SI.CL.28.cl.2844.Contig1	gnl|Amel|GB13341-PA	1e-111	chr|NC_007072|NC_007072.2 Chromosome LG3; [Apis mellifera] gi:110825767 chromosome 3 complete sequence	8.96e-95	chr|AMe_AADG05001470|AMe_AADG05001470.1	Linkage group 3; [Apis mellifera] draft genome, Amel_4.0.	3e-12	--	--	--	--	M
SiJWB05CAV.scf	gnl|Amel|GB16896-PA	1e-111	chr|NC_007070|NC_007070.2 Chromosome LG1; [Apis mellifera] gi:110825701 chromosome 1 complete sequence	8.95e-61	chr|AMe_AADG05000002|AMe_AADG05000002.1	Linkage group 1; [Apis mellifera] draft genome, Amel_4.0.	4e-36	--	--	--	--	M
SI.CL.26.cl.2600.Contig1	gnl|Amel|GB14630-PA	1e-110	chr|NC_007072|NC_007072.2 Chromosome LG3; [Apis mellifera] gi:110825767 chromosome 3 complete sequence	1.7e-153	chr|AMe_AADG05001502|AMe_AADG05001502.1	Linkage group 3; [Apis mellifera] draft genome, Amel_4.0.	7e-20	--	--	--	--	M
SI.CL.38.cl.3896.Contig1	gnl|Amel|GB12759-PA	1e-110	chr|NC_007075|NC_007075.2 Chromosome LG6; [Apis mellifera] gi:110825770 chromosome 6 complete sequence	1.84e-126	chr|AMe_AADG05005877|AMe_AADG05005877.1	Linkage group 6; [Apis mellifera] draft genome, Amel_4.0.	1e-51	ens|ENSAPMP00000008217	pep:novel group:AMEL2.0:GroupUn:4151699:4152306:1 gene:ENSAPMG00000004743 transcript:ENSAPMT00000008217	2e-61	18	M
SiJWH08CAK2.scf	gnl|Amel|GB16974-PA	1e-110	chr|NC_007075|NC_007075.2 Chromosome LG6; [Apis mellifera] gi:110825770 chromosome 6 complete sequence	6.54e-47	chr|AMe_AADG05006171|AMe_AADG05006171.1	Linkage group 6; [Apis mellifera] draft genome, Amel_4.0.	5e-17	ens|ENSAPMP00000001138	pep:novel group:AMEL2.0:Group11:3452861:3462108:-1 gene:ENSAPMG00000000695 transcript:ENSAPMT00000001138	2e-47	9	M
SiJWF08BAQ.scf	gnl|Amel|GB12814-PA	1e-110	--	--	chr|AMe_AADG05009309|AMe_AADG05009309.1	Linkage group Un; [Apis mellifera] draft genome, Amel_4.0.	2e-22	ens|ENSAPMP00000022073	pep:novel group:AMEL2.0:GroupUn:85296594:85297257:1 gene:ENSAPMG00000012184 transcript:ENSAPMT00000022067	2e-34	10	M
SiJWG07AAP.scf	gnl|Amel|GB11040-PA	1e-109	chr|NC_007070|NC_007070.2 Chromosome LG1; [Apis mellifera] gi:110825701 chromosome 1 complete sequence	4.87e-129	chr|AMe_AADG05000441|AMe_AADG05000441.1	Linkage group 1; [Apis mellifera] draft genome, Amel_4.0.	1e-32	--	--	--	--	M
SI.CL.2.cl.288.Contig1	gnl|Amel|GB14409-PA	1e-109	chr|NC_007074|NC_007074.2 Chromosome LG5; [Apis mellifera] gi:110825769 chromosome 5 complete sequence	1.97e-74	--	--	--	--	--	--	--	M
SI.CL.12.cl.1291.Contig1	gnl|Amel|GB16889-PA	1e-108	chr|NC_007076|NC_007076.2 Chromosome LG7; [Apis mellifera] gi:110825771 chromosome 7 complete sequence	1.57e-45	--	--	--	ens|ENSAPMP00000011097	pep:known group:AMEL2.0:Group12:8305200:8310995:-1 gene:ENSAPMG00000006391 transcript:ENSAPMT00000011097	1e-57	9	M
SI.CL.8.cl.871.Contig1	gnl|Amel|GB19208-PA	1e-108	chr|NC_007080|NC_007080.2 Chromosome LG11; [Apis mellifera] gi:110825732 chromosome 11 complete sequence	8.1e-24	chr|AMe_AADG05009849|AMe_AADG05009849.1	Linkage group Un; [Apis mellifera] draft genome, Amel_4.0.	2e-19	ens|ENSAPMP00000026817	pep:known group:AMEL2.0:GroupUn:77591229:77592357:1 gene:ENSAPMG00000002418 transcript:ENSAPMT00000026817	4e-96	5	M
SI.CL.12.cl.1238.Contig1	gnl|Amel|GB17707-PA	1e-107	chr|NC_007071|NC_007071.2 Chromosome LG2; [Apis mellifera] gi:110825766 chromosome 2 complete sequence	4.93e-112	chr|AMe_AADG05000923|AMe_AADG05000923.1	Linkage group 2; [Apis mellifera] draft genome, Amel_4.0.	6e-07	--	--	--	--	M
SI.CL.42.cl.4276.Contig1	gnl|Amel|GB17545-PA	1e-106	chr|NC_007075|NC_007075.2 Chromosome LG6; [Apis mellifera] gi:110825770 chromosome 6 complete sequence	3.39e-113	chr|AMe_AADG05002361|AMe_AADG05002361.1	Linkage group 6; [Apis mellifera] draft genome, Amel_4.0.	2e-78	ens|ENSAPMP00000012237	pep:known group:AMEL2.0:Group6:5317000:5320541:-1 gene:ENSAPMG00000007010 transcript:ENSAPMT00000012237	1e-104	3	M
SI.CL.35.cl.3593.Contig1	gnl|Amel|GB13023-PA	1e-106	chr|NC_007072|NC_007072.2 Chromosome LG3; [Apis mellifera] gi:110825767 chromosome 3 complete sequence	4.53e-100	chr|AMe_AADG05001391|AMe_AADG05001391.1	Linkage group 3; [Apis mellifera] draft genome, Amel_4.0.	2e-12	ens|ENSAPMP00000004685	pep:novel group:AMEL2.0:GroupUn:2770556:2772912:1 gene:ENSAPMG00000002680 transcript:ENSAPMT00000004685	6e-69	3	M
SI.CL.23.cl.2304.Contig1	gnl|Amel|GB18579-PA	1e-106	chr|NC_007074|NC_007074.2 Chromosome LG5; [Apis mellifera] gi:110825769 chromosome 5 complete sequence	7.99e-56	--	--	--	--	--	--	--	M
SI.CL.0.cl.094.Contig1	gnl|Amel|GB18891-PA	1e-105	chr|NC_007084|NC_007084.2 Chromosome LG15; [Apis mellifera] gi:110825764 chromosome 15 complete sequence	9.86e-110	chr|AMe_AADG05005447|AMe_AADG05005447.1	Linkage group 15; [Apis mellifera] draft genome, Amel_4.0.	4e-32	--	--	--	--	M
SI.CL.28.cl.2813.Contig1	gnl|Amel|GB15496-PA	1e-105	chr|NC_007085|NC_007085.2 Chromosome LG16; [Apis mellifera] gi:110825765 chromosome 16 complete sequence	1.71e-91	chr|AMe_AADG05005683|AMe_AADG05005683.1	Linkage group 16; [Apis mellifera] draft genome, Amel_4.0.	1e-75	--	--	--	--	M
SI.CL.4.cl.458.Contig2	gnl|Amel|GB18062-PA	1e-105	chr|NC_007083|NC_007083.2 Chromosome LG14; [Apis mellifera] gi:110825763 chromosome 14 complete sequence	8.54e-56	chr|AMe_AADG05005052|AMe_AADG05005052.1	Linkage group 14; [Apis mellifera] draft genome, Amel_4.0.	4e-06	--	--	--	--	M
SI.CL.24.cl.2485.Contig1	gnl|Amel|GB11967-PA	1e-104	chr|NC_007080|NC_007080.2 Chromosome LG11; [Apis mellifera] gi:110825732 chromosome 11 complete sequence	7.29e-124	chr|AMe_AADG05006462|AMe_AADG05006462.1	Linkage group 11; [Apis mellifera] draft genome, Amel_4.0.	4e-17	--	--	--	--	M
SI.CL.24.cl.2480.Contig1	gnl|Amel|GB15352-PA	1e-104	chr|NC_007079|NC_007079.2 Chromosome LG10; [Apis mellifera] gi:110825711 chromosome 10 complete sequence	8.79e-76	chr|AMe_AADG05003951|AMe_AADG05003951.1	Linkage group 10; [Apis mellifera] draft genome, Amel_4.0.	1e-23	--	--	--	--	M
SI.CL.10.cl.1011.Contig1	gnl|Amel|GB19082-PA	1e-104	chr|NC_007083|NC_007083.2 Chromosome LG14; [Apis mellifera] gi:110825763 chromosome 14 complete sequence	2.26e-58	chr|AMe_AADG05005130|AMe_AADG05005130.1	Linkage group 14; [Apis mellifera] draft genome, Amel_4.0.	9e-15	--	--	--	--	M
SI.CL.6.cl.612.Contig1	gnl|Amel|GB19296-PA	1e-103	chr|NC_007070|NC_007070.2 Chromosome LG1; [Apis mellifera] gi:110825701 chromosome 1 complete sequence	6.47e-92	chr|AMe_AADG05000653|AMe_AADG05000653.1	Linkage group 1; [Apis mellifera] draft genome, Amel_4.0.	3e-50	ens|ENSAPMP00000015757	pep:known group:AMEL2.0:Group1:22014951:22016668:-1 gene:ENSAPMG00000009027 transcript:ENSAPMT00000015757	1e-101	17	M
SI.CL.5.cl.519.Contig1	gnl|Amel|GB19915-PA	1e-103	chr|NC_007083|NC_007083.2 Chromosome LG14; [Apis mellifera] gi:110825763 chromosome 14 complete sequence	1.24e-72	chr|AMe_AADG05005034|AMe_AADG05005034.1	Linkage group 14; [Apis mellifera] draft genome, Amel_4.0.	1e-33	ens|ENSAPMP00000023168	pep:novel group:AMEL2.0:Group14:1652380:1653146:1 gene:ENSAPMG00000015326 transcript:ENSAPMT00000023164	2e-72	20	M
SI.CL.35.cl.3510.Contig1	gnl|Amel|GB17238-PA	1e-102	chr|NC_007071|NC_007071.2 Chromosome LG2; [Apis mellifera] gi:110825766 chromosome 2 complete sequence	3.12e-115	chr|AMe_AADG05000768|AMe_AADG05000768.1	Linkage group 2; [Apis mellifera] draft genome, Amel_4.0.	7e-19	ens|ENSAPMP00000020811	pep:novel group:AMEL2.0:Group2:80552:81833:-1 gene:ENSAPMG00000015497 transcript:ENSAPMT00000020805	1e-103	3	M
SI.CL.5.cl.543.Contig1	gnl|Amel|GB19003-PA	1e-102	chr|NC_007083|NC_007083.2 Chromosome LG14; [Apis mellifera] gi:110825763 chromosome 14 complete sequence	3.09e-114	--	--	--	--	--	--	--	M
SI.CL.30.cl.3047.Contig1	gnl|Amel|GB14710-PA	1e-102	chr|NC_007082|NC_007082.2 Chromosome LG13; [Apis mellifera] gi:110825762 chromosome 13 complete sequence	5.34e-81	chr|AMe_AADG05004829|AMe_AADG05004829.1	Linkage group 13; [Apis mellifera] draft genome, Amel_4.0.	3e-44	--	--	--	--	M
SiJWE12ABF.scf	gnl|Amel|GB10819-PA	1e-102	chr|NC_007076|NC_007076.2 Chromosome LG7; [Apis mellifera] gi:110825771 chromosome 7 complete sequence	2.01e-67	chr|AMe_AADG05006400|AMe_AADG05006400.1	Linkage group Un; [Apis mellifera] draft genome, Amel_4.0.	3e-70	--	--	--	--	M
SI.CL.2.cl.287.Contig1	gnl|Amel|GB13085-PA	1e-102	--	--	chr|AMe_AADG05006676|AMe_AADG05006676.1	Linkage group Un; [Apis mellifera] draft genome, Amel_4.0.	1e-09	ens|ENSAPMP00000012843	pep:known group:AMEL2.0:GroupUn:302240716:302241352:1 gene:ENSAPMG00000007353 transcript:ENSAPMT00000012843	2e-74	3	M
SI.CL.41.cl.4102.Contig1	gnl|Amel|GB19053-PA	1e-102	--	--	chr|AMe_AADG05006453|AMe_AADG05006453.1	Linkage group Un; [Apis mellifera] draft genome, Amel_4.0.	2e-09	--	--	--	--	M
SI.CL.16.cl.1612.SiJWH05ABV.scf	gnl|Amel|GB16155-PA	1e-101	chr|NC_007083|NC_007083.2 Chromosome LG14; [Apis mellifera] gi:110825763 chromosome 14 complete sequence	3.46e-115	chr|AMe_AADG05005034|AMe_AADG05005034.1	Linkage group 14; [Apis mellifera] draft genome, Amel_4.0.	1e-14	--	--	--	--	M
SiJWG11ADB.scf	gnl|Amel|GB15204-PA	1e-101	chr|NC_007074|NC_007074.2 Chromosome LG5; [Apis mellifera] gi:110825769 chromosome 5 complete sequence	2.09e-96	chr|AMe_AADG05001950|AMe_AADG05001950.1	Linkage group 5; [Apis mellifera] draft genome, Amel_4.0.	1e-78	--	--	--	--	M
SiJWA08ABA.scf	gnl|Amel|GB14656-PA	1e-100	chr|NC_007072|NC_007072.2 Chromosome LG3; [Apis mellifera] gi:110825767 chromosome 3 complete sequence	2.81e-114	--	--	--	--	--	--	--	M
SI.CL.17.cl.1731.Contig1	gnl|Amel|GB13608-PA	1e-100	chr|NC_007074|NC_007074.2 Chromosome LG5; [Apis mellifera] gi:110825769 chromosome 5 complete sequence	1.1e-92	chr|AMe_AADG05002045|AMe_AADG05002045.1	Linkage group 5; [Apis mellifera] draft genome, Amel_4.0.	4e-17	--	--	--	--	M
SI.CL.20.cl.2084.Contig1	gnl|Amel|GB14985-PA	1e-100	chr|NC_007073|NC_007073.2 Chromosome LG4; [Apis mellifera] gi:110825768 chromosome 4 complete sequence	2.36e-91	chr|AMe_AADG05001598|AMe_AADG05001598.1	Linkage group 4; [Apis mellifera] draft genome, Amel_4.0.	2e-07	ens|ENSAPMP00000002517	pep:known group:AMEL2.0:Group4:1375015:1375795:-1 gene:ENSAPMG00000001452 transcript:ENSAPMT00000002517	8e-47	3	M
SiJWC12CAP.scf	gnl|Amel|GB15351-PA	1e-100	chr|NC_007081|NC_007081.2 Chromosome LG12; [Apis mellifera] gi:110825756 chromosome 12 complete sequence	7.62e-81	chr|AMe_AADG05004643|AMe_AADG05004643.1	Linkage group 12; [Apis mellifera] draft genome, Amel_4.0.	4e-14	--	--	--	--	M
SiJWF08BEA.scf	gnl|Amel|GB12116-PA	1e-100	chr|NC_007082|NC_007082.2 Chromosome LG13; [Apis mellifera] gi:110825762 chromosome 13 complete sequence	7.41e-66	--	--	--	--	--	--	--	M
SI.CL.38.cl.3804.Contig1	gnl|Amel|GB13505-PA	1e-100	chr|NC_007074|NC_007074.2 Chromosome LG5; [Apis mellifera] gi:110825769 chromosome 5 complete sequence	8.25e-59	chr|AMe_AADG05001976|AMe_AADG05001976.1	Linkage group 5; [Apis mellifera] draft genome, Amel_4.0.	2e-07	--	--	--	--	M
SI.CL.0.cl.052.Contig1	gnl|Amel|GB18003-PA	1e-100	chr|NC_007073|NC_007073.2 Chromosome LG4; [Apis mellifera] gi:110825768 chromosome 4 complete sequence	1.12e-08	chr|AMe_AADG05007041|AMe_AADG05007041.1	Linkage group Un; [Apis mellifera] draft genome, Amel_4.0.	1e-21	--	--	--	--	M
SI.CL.20.cl.2063.Contig1	gnl|Amel|GB19461-PA	2e-99	chr|NC_007071|NC_007071.2 Chromosome LG2; [Apis mellifera] gi:110825766 chromosome 2 complete sequence	3.56e-95	chr|AMe_AADG05007692|AMe_AADG05007692.1	Linkage group 2; [Apis mellifera] draft genome, Amel_4.0.	6e-38	--	--	--	--	M
SI.CL.3.cl.360.Contig1	gnl|Amel|GB18498-PA	5e-99	chr|NC_007080|NC_007080.2 Chromosome LG11; [Apis mellifera] gi:110825732 chromosome 11 complete sequence	2.93e-07	chr|AMe_AADG05014028|AMe_AADG05014028.1	Linkage group Un; [Apis mellifera] draft genome, Amel_4.0.	4e-09	--	--	--	--	M
SI.CL.24.cl.2422.Contig1	gnl|Amel|GB17465-PA	5e-99	--	--	--	--	--	ens|ENSAPMP00000002605	pep:known group:AMEL2.0:GroupUn:49141326:49142536:-1 gene:ENSAPMG00000001511 transcript:ENSAPMT00000002605	1e-55	4	M
SI.CL.22.cl.2232.SiJWC10ADK.scf	gnl|Amel|GB17833-PA	5e-99	--	--	--	--	--	--	--	--	--	M
SiJWH02AAM.scf	gnl|Amel|GB19395-PA	1e-98	chr|NC_007077|NC_007077.2 Chromosome LG8; [Apis mellifera] gi:110825772 chromosome 8 complete sequence	5.35e-37	chr|AMe_AADG05014819|AMe_AADG05014819.1	Linkage group Un; [Apis mellifera] draft genome, Amel_4.0.	2e-35	--	--	--	--	M
SiJWE04CAV.scf	gnl|Amel|GB15351-PA	3e-98	chr|NC_007081|NC_007081.2 Chromosome LG12; [Apis mellifera] gi:110825756 chromosome 12 complete sequence	4.25e-84	chr|AMe_AADG05004643|AMe_AADG05004643.1	Linkage group 12; [Apis mellifera] draft genome, Amel_4.0.	1e-11	--	--	--	--	M
SI.CL.24.cl.2494.Contig1	gnl|Amel|GB11766-PA	1e-97	chr|NC_007081|NC_007081.2 Chromosome LG12; [Apis mellifera] gi:110825756 chromosome 12 complete sequence	1.83e-96	chr|AMe_AADG05005963|AMe_AADG05005963.1	Linkage group 12; [Apis mellifera] draft genome, Amel_4.0.	4e-20	--	--	--	--	M
SiJWD03ADI.scf	gnl|Amel|GB17319-PA	4e-97	chr|NC_007071|NC_007071.2 Chromosome LG2; [Apis mellifera] gi:110825766 chromosome 2 complete sequence	4.81e-50	chr|AMe_AADG05000881|AMe_AADG05000881.1	Linkage group 2; [Apis mellifera] draft genome, Amel_4.0.	2e-10	ens|ENSAPMP00000023156	pep:novel group:AMEL2.0:Group2:2776227:2777267:-1 gene:ENSAPMG00000015524 transcript:ENSAPMT00000023152	8e-38	14	M
SiJWG03BBW.scf	gnl|Amel|GB19036-PA	8e-97	chr|NC_007070|NC_007070.2 Chromosome LG1; [Apis mellifera] gi:110825701 chromosome 1 complete sequence	5.2e-70	chr|AMe_AADG05013109|AMe_AADG05013109.1	Linkage group Un; [Apis mellifera] draft genome, Amel_4.0.	3e-18	--	--	--	--	M
SI.CL.13.cl.1387.Contig1	gnl|Amel|GB16282-PA	9e-97	chr|NC_007077|NC_007077.2 Chromosome LG8; [Apis mellifera] gi:110825772 chromosome 8 complete sequence	4.32e-75	chr|AMe_AADG05003013|AMe_AADG05003013.1	Linkage group 8; [Apis mellifera] draft genome, Amel_4.0.	3e-14	--	--	--	--	M
SI.CL.19.cl.1961.Contig1	gnl|Amel|GB18495-PA	1e-96	chr|NC_007074|NC_007074.2 Chromosome LG5; [Apis mellifera] gi:110825769 chromosome 5 complete sequence	1.27e-104	chr|AMe_AADG05001997|AMe_AADG05001997.1	Linkage group 5; [Apis mellifera] draft genome, Amel_4.0.	5e-66	--	--	--	--	M
SI.CL.22.cl.2277.Contig1	gnl|Amel|GB15535-PA	1e-96	chr|NC_007072|NC_007072.2 Chromosome LG3; [Apis mellifera] gi:110825767 chromosome 3 complete sequence	6.45e-93	chr|AMe_AADG05001492|AMe_AADG05001492.1	Linkage group 3; [Apis mellifera] draft genome, Amel_4.0.	4e-11	ens|ENSAPMP00000015857	pep:novel group:AMEL2.0:Group3:9793812:9794610:-1 gene:ENSAPMG00000009086 transcript:ENSAPMT00000015857	2e-54	6	M
SiJWA02ADH.scf	gnl|Amel|GB17946-PA	4e-96	chr|NC_007070|NC_007070.2 Chromosome LG1; [Apis mellifera] gi:110825701 chromosome 1 complete sequence	9.73e-61	chr|AMe_AADG05017925|AMe_AADG05017925.1	Linkage group Un; [Apis mellifera] draft genome, Amel_4.0.	1e-26	--	--	--	--	M
SI.CL.21.cl.2191.Contig1	gnl|Amel|GB10781-PA	9e-96	--	--	chr|AMe_AADG05006759|AMe_AADG05006759.1	Linkage group Un; [Apis mellifera] draft genome, Amel_4.0.	7e-13	--	--	--	--	M
SI.CL.32.cl.3291.Contig1	gnl|Amel|GB17863-PA	1e-95	chr|NC_007072|NC_007072.2 Chromosome LG3; [Apis mellifera] gi:110825767 chromosome 3 complete sequence	4.02e-93	chr|AMe_AADG05001453|AMe_AADG05001453.1	Linkage group 3; [Apis mellifera] draft genome, Amel_4.0.	2e-22	--	--	--	--	M
SiJWG02CAU2.scf	gnl|Amel|GB13343-PA	3e-95	chr|NC_007073|NC_007073.2 Chromosome LG4; [Apis mellifera] gi:110825768 chromosome 4 complete sequence	5.53e-101	chr|AMe_AADG05001612|AMe_AADG05001612.1	Linkage group 4; [Apis mellifera] draft genome, Amel_4.0.	2e-29	--	--	--	--	M
SI.CL.11.cl.1156.SiJWB03BDW.scf	gnl|Amel|GB15167-PA	3e-95	chr|NC_007079|NC_007079.2 Chromosome LG10; [Apis mellifera] gi:110825711 chromosome 10 complete sequence	1.86e-62	chr|AMe_AADG05004002|AMe_AADG05004002.1	Linkage group 10; [Apis mellifera] draft genome, Amel_4.0.	1e-17	--	--	--	--	M
SI.CL.33.cl.3374.Contig1	gnl|Amel|GB15266-PA	8e-95	chr|NC_007070|NC_007070.2 Chromosome LG1; [Apis mellifera] gi:110825701 chromosome 1 complete sequence	6.4e-108	chr|AMe_AADG05000383|AMe_AADG05000383.1	Linkage group 1; [Apis mellifera] draft genome, Amel_4.0.	1e-41	--	--	--	--	M
SiJWD11CAF2.scf	gnl|Amel|GB18383-PA	3e-94	chr|NC_007072|NC_007072.2 Chromosome LG3; [Apis mellifera] gi:110825767 chromosome 3 complete sequence	1.94e-32	chr|AMe_AADG05006560|AMe_AADG05006560.1	Linkage group Un; [Apis mellifera] draft genome, Amel_4.0.	6e-23	--	--	--	--	M
SI.CL.1.cl.185.Contig1	gnl|Amel|GB14396-PA	7e-94	chr|NC_007071|NC_007071.2 Chromosome LG2; [Apis mellifera] gi:110825766 chromosome 2 complete sequence	4.16e-52	--	--	--	ens|ENSAPMP00000003310	pep:novel group:AMEL2.0:GroupUn:4581151:4585320:1 gene:ENSAPMG00000001930 transcript:ENSAPMT00000003310	6e-12	6	M
SI.CL.43.cl.4303.SiJWG03BDQR5C12.scf	gnl|Amel|GB18600-PA	7e-94	--	--	--	--	--	--	--	--	--	M
SI.CL.26.cl.2650.Contig1	gnl|Amel|GB19048-PA	4e-93	chr|NC_007083|NC_007083.2 Chromosome LG14; [Apis mellifera] gi:110825763 chromosome 14 complete sequence	2.13e-132	chr|AMe_AADG05005110|AMe_AADG05005110.1	Linkage group 14; [Apis mellifera] draft genome, Amel_4.0.	4e-24	ens|ENSAPMP00000008677	pep:known group:AMEL2.0:Group14:4230871:4232034:1 gene:ENSAPMG00000005016 transcript:ENSAPMT00000008677	1e-51	9	M
SiJWB06ABQ.scf	gnl|Amel|GB18615-PA	6e-93	chr|NC_007077|NC_007077.2 Chromosome LG8; [Apis mellifera] gi:110825772 chromosome 8 complete sequence	1.24e-89	chr|AMe_AADG05003052|AMe_AADG05003052.1	Linkage group 8; [Apis mellifera] draft genome, Amel_4.0.	2e-25	--	--	--	--	M
SI.CL.30.cl.3024.Contig1	gnl|Amel|GB19377-PA	4e-92	chr|NC_007072|NC_007072.2 Chromosome LG3; [Apis mellifera] gi:110825767 chromosome 3 complete sequence	1.65e-95	chr|AMe_AADG05001441|AMe_AADG05001441.1	Linkage group 3; [Apis mellifera] draft genome, Amel_4.0.	3e-08	--	--	--	--	M
SI.CL.15.cl.1543.Contig1	gnl|Amel|GB11741-PA	2e-91	--	--	--	--	--	--	--	--	--	M
SiJWG08ADG.scf	gnl|Amel|GB19200-PA	5e-91	chr|NC_007073|NC_007073.2 Chromosome LG4; [Apis mellifera] gi:110825768 chromosome 4 complete sequence	1.54e-50	chr|AMe_AADG05001629|AMe_AADG05001629.1	Linkage group 4; [Apis mellifera] draft genome, Amel_4.0.	3e-18	--	--	--	--	M
SI.CL.11.cl.1173.Contig1	gnl|Amel|GB10771-PA	5e-91	--	--	chr|AMe_AADG05012692|AMe_AADG05012692.1	Linkage group Un; [Apis mellifera] draft genome, Amel_4.0.	1e-05	ens|ENSAPMP00000018902	pep:known group:AMEL2.0:GroupUn:282037562:282038187:1 gene:ENSAPMG00000010939 transcript:ENSAPMT00000018899	7e-55	20	M
SI.CL.7.cl.749.Contig1	gnl|Amel|GB12356-PA	8e-91	chr|NC_007075|NC_007075.2 Chromosome LG6; [Apis mellifera] gi:110825770 chromosome 6 complete sequence	3.91e-57	chr|AMe_AADG05005791|AMe_AADG05005791.1	Linkage group 6; [Apis mellifera] draft genome, Amel_4.0.	6e-13	ens|ENSAPMP00000003793	pep:known group:AMEL2.0:GroupUn:249721685:249722728:1 gene:ENSAPMG00000002199 transcript:ENSAPMT00000003793	6e-58	20	M
SI.CL.0.cl.072.Contig1	gnl|Amel|GB19130-PA	2e-90	chr|NC_007084|NC_007084.2 Chromosome LG15; [Apis mellifera] gi:110825764 chromosome 15 complete sequence	3.56e-72	chr|AMe_AADG05006068|AMe_AADG05006068.1	Linkage group 15; [Apis mellifera] draft genome, Amel_4.0.	4e-11	ens|ENSAPMP00000029621	pep:novel group:AMEL2.0:GroupUn:8039293:8040379:1 gene:ENSAPMG00000011042 transcript:ENSAPMT00000029623	5e-75	4	M
SI.CL.19.cl.1917.Contig1	gnl|Amel|GB15187-PA	4e-90	chr|NC_007073|NC_007073.2 Chromosome LG4; [Apis mellifera] gi:110825768 chromosome 4 complete sequence	9.51e-91	chr|AMe_AADG05001764|AMe_AADG05001764.1	Linkage group 4; [Apis mellifera] draft genome, Amel_4.0.	1e-14	ens|ENSAPMP00000019991	pep:novel group:AMEL2.0:Group4:8217471:8218795:1 gene:ENSAPMG00000013940 transcript:ENSAPMT00000019986	2e-39	3	M
SiJWC04AAO.scf	gnl|Amel|GB19266-PA	4e-90	chr|NC_007080|NC_007080.2 Chromosome LG11; [Apis mellifera] gi:110825732 chromosome 11 complete sequence	2.66e-23	--	--	--	--	--	--	--	M
SiJWF05ADM.scf	gnl|Amel|GB13922-PA	7e-90	chr|NC_007070|NC_007070.2 Chromosome LG1; [Apis mellifera] gi:110825701 chromosome 1 complete sequence	9.04e-52	chr|AMe_AADG05000312|AMe_AADG05000312.1	Linkage group 1; [Apis mellifera] draft genome, Amel_4.0.	3e-18	--	--	--	--	M
SiJWG08AAQ.scf	gnl|Amel|GB14673-PA	2e-89	chr|NC_007079|NC_007079.2 Chromosome LG10; [Apis mellifera] gi:110825711 chromosome 10 complete sequence	8.98e-21	--	--	--	ens|ENSAPMP00000015110	pep:known group:AMEL2.0:Group10:2566243:2567398:-1 gene:ENSAPMG00000008633 transcript:ENSAPMT00000015110	1e-75	2	M
SI.CL.37.cl.3785.Contig1	gnl|Amel|GB13063-PA	4e-89	chr|NC_007083|NC_007083.2 Chromosome LG14; [Apis mellifera] gi:110825763 chromosome 14 complete sequence	5.35e-59	--	--	--	--	--	--	--	M
SiJWC11ADN.scf	gnl|Amel|GB12779-PA	5e-89	chr|NC_007073|NC_007073.2 Chromosome LG4; [Apis mellifera] gi:110825768 chromosome 4 complete sequence	1.85e-74	chr|AMe_AADG05001594|AMe_AADG05001594.1	Linkage group 4; [Apis mellifera] draft genome, Amel_4.0.	4e-17	--	--	--	--	M
SI.CL.11.cl.1153.Contig1	gnl|Amel|GB13798-PA	7e-89	chr|NC_007072|NC_007072.2 Chromosome LG3; [Apis mellifera] gi:110825767 chromosome 3 complete sequence	1.64e-89	chr|AMe_AADG05001192|AMe_AADG05001192.1	Linkage group 3; [Apis mellifera] draft genome, Amel_4.0.	8e-38	--	--	--	--	M
SiJWA05BAA2.scf	gnl|Amel|GB16360-PA	7e-89	chr|NC_007074|NC_007074.2 Chromosome LG5; [Apis mellifera] gi:110825769 chromosome 5 complete sequence	6.02e-46	--	--	--	--	--	--	--	M
SiJWG12BAQ.scf	gnl|Amel|GB14810-PA	8e-89	chr|NC_007072|NC_007072.2 Chromosome LG3; [Apis mellifera] gi:110825767 chromosome 3 complete sequence	5.13e-92	--	--	--	ens|ENSAPMP00000010856	pep:known group:AMEL2.0:GroupUn:31625550:31626213:1 gene:ENSAPMG00000006273 transcript:ENSAPMT00000010856	3e-43	10	M
SiJWF02AAU.scf	gnl|Amel|GB17353-PA	2e-88	chr|NC_007077|NC_007077.2 Chromosome LG8; [Apis mellifera] gi:110825772 chromosome 8 complete sequence	1.68e-90	--	--	--	--	--	--	--	M
SI.CL.41.cl.4138.Contig1	gnl|Amel|GB10626-PA	2e-88	chr|NC_007071|NC_007071.2 Chromosome LG2; [Apis mellifera] gi:110825766 chromosome 2 complete sequence	2.1e-61	chr|AMe_AADG05000851|AMe_AADG05000851.1	Linkage group 2; [Apis mellifera] draft genome, Amel_4.0.	1e-05	ens|ENSAPMP00000016158	pep:known group:AMEL2.0:Group2:2150649:2152195:-1 gene:ENSAPMG00000009235 transcript:ENSAPMT00000016158	3e-86	3	M
SI.CL.27.cl.2793.Contig1	gnl|Amel|GB12556-PA	7e-88	chr|NC_007071|NC_007071.2 Chromosome LG2; [Apis mellifera] gi:110825766 chromosome 2 complete sequence	1.6e-86	chr|AMe_AADG05000798|AMe_AADG05000798.1	Linkage group 2; [Apis mellifera] draft genome, Amel_4.0.	1e-54	--	--	--	--	M
SiJWF07BCW2.scf	gnl|Amel|GB13031-PA	1e-87	--	--	chr|AMe_AADG05007289|AMe_AADG05007289.1	Linkage group Un; [Apis mellifera] draft genome, Amel_4.0.	7e-13	ens|ENSAPMP00000035235	pep:novel group:AMEL2.0:GroupUn:90728006:90728723:-1 gene:ENSAPMG00000010732 transcript:ENSAPMT00000035236	3e-61	3	M
SI.CL.12.cl.1279.Contig1	gnl|Amel|GB19171-PA	3e-87	--	--	chr|AMe_AADG05006397|AMe_AADG05006397.1	Linkage group Un; [Apis mellifera] draft genome, Amel_4.0.	1e-18	ens|ENSAPMP00000020827	pep:novel group:AMEL2.0:GroupUn:67491260:67493535:-1 gene:ENSAPMG00000001809 transcript:ENSAPMT00000020821	4e-85	9	M
SiJWH02AAJ.scf	gnl|Amel|GB18263-PA	6e-87	chr|NC_007074|NC_007074.2 Chromosome LG5; [Apis mellifera] gi:110825769 chromosome 5 complete sequence	1.91e-25	chr|AMe_AADG05007880|AMe_AADG05007880.1	Linkage group Un; [Apis mellifera] draft genome, Amel_4.0.	4e-45	--	--	--	--	M
SI.CL.21.cl.2181.Contig1	gnl|Amel|GB14210-PA	1e-86	chr|NC_007077|NC_007077.2 Chromosome LG8; [Apis mellifera] gi:110825772 chromosome 8 complete sequence	6.44e-08	--	--	--	--	--	--	--	M
SI.CL.27.cl.2782.Contig1	gnl|Amel|GB16825-PA	2e-86	--	--	chr|AMe_AADG05007168|AMe_AADG05007168.1	Linkage group Un; [Apis mellifera] draft genome, Amel_4.0.	4e-32	--	--	--	--	M
SiJWC08ADV.scf	gnl|Amel|GB12338-PA	2e-86	--	--	--	--	--	ens|ENSAPMP00000027468	pep:novel group:AMEL2.0:GroupUn:28818028:28820232:-1 gene:ENSAPMG00000003949 transcript:ENSAPMT00000027468	3e-85	10	M
SI.CL.14.cl.1465.Contig1	gnl|Amel|GB11194-PA	4e-86	chr|NC_007082|NC_007082.2 Chromosome LG13; [Apis mellifera] gi:110825762 chromosome 13 complete sequence	2.67e-09	chr|AMe_AADG05006465|AMe_AADG05006465.1	Linkage group Un; [Apis mellifera] draft genome, Amel_4.0.	2e-07	--	--	--	--	M
SI.CL.28.cl.2857.Contig1	gnl|Amel|GB20112-PA	7e-86	chr|NC_007074|NC_007074.2 Chromosome LG5; [Apis mellifera] gi:110825769 chromosome 5 complete sequence	3.61e-91	chr|AMe_AADG05005993|AMe_AADG05005993.1	Linkage group Un; [Apis mellifera] draft genome, Amel_4.0.	3e-48	ens|ENSAPMP00000008307	pep:novel group:AMEL2.0:Group5:13016490:13017881:-1 gene:ENSAPMG00000004800 transcript:ENSAPMT00000008307	7e-84	4	M
SI.CL.16.cl.1652.Contig1	gnl|Amel|GB12989-PA	1e-85	chr|NC_007071|NC_007071.2 Chromosome LG2; [Apis mellifera] gi:110825766 chromosome 2 complete sequence	4.22e-63	--	--	--	--	--	--	--	M
SI.CL.21.cl.2155.Contig1	gnl|Amel|GB11437-PA	2e-85	chr|NC_007072|NC_007072.2 Chromosome LG3; [Apis mellifera] gi:110825767 chromosome 3 complete sequence	2.18e-91	chr|AMe_AADG05001174|AMe_AADG05001174.1	Linkage group 3; [Apis mellifera] draft genome, Amel_4.0.	1e-47	--	--	--	--	M
SI.CL.9.cl.917.Contig1	gnl|Amel|GB17117-PA	8e-85	chr|NC_007083|NC_007083.2 Chromosome LG14; [Apis mellifera] gi:110825763 chromosome 14 complete sequence	1.91e-86	--	--	--	--	--	--	--	M
SI.CL.22.cl.2259.Contig1	gnl|Amel|GB15289-PA	1e-84	--	--	chr|AMe_AADG05013652|AMe_AADG05013652.1	Linkage group Un; [Apis mellifera] draft genome, Amel_4.0.	2e-10	ens|ENSAPMP00000020285	pep:novel group:AMEL2.0:GroupUn:274421259:274421929:-1 gene:ENSAPMG00000012049 transcript:ENSAPMT00000020280	1e-57	3	M
SiJWB09CAT2.scf	gnl|Amel|GB18035-PA	3e-84	chr|NC_007071|NC_007071.2 Chromosome LG2; [Apis mellifera] gi:110825766 chromosome 2 complete sequence	4.37e-80	chr|AMe_AADG05000972|AMe_AADG05000972.1	Linkage group 2; [Apis mellifera] draft genome, Amel_4.0.	4e-33	ens|ENSAPMP00000031807	pep:novel group:AMEL2.0:Group2:6276263:6277817:-1 gene:ENSAPMG00000012264 transcript:ENSAPMT00000031807	2e-38	20	M
SI.CL.7.cl.705.Contig1	gnl|Amel|GB15565-PA	1e-83	--	--	chr|AMe_AADG05009849|AMe_AADG05009849.1	Linkage group Un; [Apis mellifera] draft genome, Amel_4.0.	2e-22	--	--	--	--	M
SiJWF06AAW.scf	gnl|Amel|GB11143-PA	1e-83	--	--	--	--	--	--	--	--	--	M
SI.CL.3.cl.382.Contig1	gnl|Amel|GB19973-PA	4e-83	chr|NC_007074|NC_007074.2 Chromosome LG5; [Apis mellifera] gi:110825769 chromosome 5 complete sequence	1.04e-53	chr|AMe_AADG05002203|AMe_AADG05002203.1	Linkage group 5; [Apis mellifera] draft genome, Amel_4.0.	4e-34	--	--	--	--	M
SI.CL.32.cl.3231.Contig1	gnl|Amel|GB14443-PA	6e-83	chr|NC_007074|NC_007074.2 Chromosome LG5; [Apis mellifera] gi:110825769 chromosome 5 complete sequence	5.64e-82	chr|AMe_AADG05002203|AMe_AADG05002203.1	Linkage group 5; [Apis mellifera] draft genome, Amel_4.0.	6e-37	--	--	--	--	M
SI.CL.10.cl.1094.Contig1	gnl|Amel|GB17999-PA	7e-83	chr|NC_007078|NC_007078.2 Chromosome LG9; [Apis mellifera] gi:110825774 chromosome 9 complete sequence	1.55e-83	chr|AMe_AADG05003581|AMe_AADG05003581.1	Linkage group 9; [Apis mellifera] draft genome, Amel_4.0.	3e-15	--	--	--	--	M
SI.CL.2.cl.216.Contig1	gnl|Amel|GB15287-PA	7e-83	chr|NC_007076|NC_007076.2 Chromosome LG7; [Apis mellifera] gi:110825771 chromosome 7 complete sequence	3.33e-38	chr|AMe_AADG05002798|AMe_AADG05002798.1	Linkage group 7; [Apis mellifera] draft genome, Amel_4.0.	1e-23	--	--	--	--	M
SI.CL.1.cl.157.Contig1	gnl|Amel|GB17552-PA	7e-83	--	--	chr|AMe_AADG05008510|AMe_AADG05008510.1	Linkage group Un; [Apis mellifera] draft genome, Amel_4.0.	7e-32	--	--	--	--	M
SI.CL.24.cl.2409.Contig1	gnl|Amel|GB18999-PA	9e-83	chr|NC_007070|NC_007070.2 Chromosome LG1; [Apis mellifera] gi:110825701 chromosome 1 complete sequence	1.73e-76	chr|AMe_AADG05000539|AMe_AADG05000539.1	Linkage group 1; [Apis mellifera] draft genome, Amel_4.0.	9e-24	--	--	--	--	M
SI.CL.2.cl.271.Contig1	gnl|Amel|GB17592-PA	2e-82	chr|NC_007070|NC_007070.2 Chromosome LG1; [Apis mellifera] gi:110825701 chromosome 1 complete sequence	8.87e-92	chr|AMe_AADG05000621|AMe_AADG05000621.1	Linkage group 1; [Apis mellifera] draft genome, Amel_4.0.	7e-14	ens|ENSAPMP00000031335	pep:novel group:AMEL2.0:Group1:20605541:20606425:-1 gene:ENSAPMG00000015310 transcript:ENSAPMT00000031334	2e-47	10	M
SI.CL.9.cl.978.Contig1	gnl|Amel|GB18045-PA	2e-82	chr|NC_007084|NC_007084.2 Chromosome LG15; [Apis mellifera] gi:110825764 chromosome 15 complete sequence	2.03e-45	--	--	--	--	--	--	--	M
SI.CL.12.cl.1235.Contig1	gnl|Amel|GB19975-PA	3e-82	chr|NC_007080|NC_007080.2 Chromosome LG11; [Apis mellifera] gi:110825732 chromosome 11 complete sequence	5.41e-98	--	--	--	--	--	--	--	M
SiJWE03BAN.scf	gnl|Amel|GB11771-PA	5e-82	--	--	--	--	--	--	--	--	--	M
SI.CL.22.cl.2236.Contig1	gnl|Amel|GB10052-PA	1e-81	chr|NC_007084|NC_007084.2 Chromosome LG15; [Apis mellifera] gi:110825764 chromosome 15 complete sequence	1.99e-70	chr|AMe_AADG05005383|AMe_AADG05005383.1	Linkage group 15; [Apis mellifera] draft genome, Amel_4.0.	4e-11	--	--	--	--	M
SI.CL.17.cl.1786.Contig1	gnl|Amel|GB19312-PA	2e-81	chr|NC_007070|NC_007070.2 Chromosome LG1; [Apis mellifera] gi:110825701 chromosome 1 complete sequence	3.04e-35	--	--	--	--	--	--	--	M
SiJWG07BDY.scf	gnl|Amel|GB15770-PA	3e-81	--	--	chr|AMe_AADG05016962|AMe_AADG05016962.1	Linkage group Un; [Apis mellifera] draft genome, Amel_4.0.	2e-22	ens|ENSAPMP00000017750	pep:novel group:AMEL2.0:GroupUn:251561155:251562018:-1 gene:ENSAPMG00000015539 transcript:ENSAPMT00000017749	1e-44	5	M
SI.CL.18.cl.1834.Contig1	gnl|Amel|GB12039-PA	3e-81	--	--	chr|AMe_AADG05008065|AMe_AADG05008065.1	Linkage group Un; [Apis mellifera] draft genome, Amel_4.0.	2e-15	--	--	--	--	M
SI.CL.6.cl.616.Contig1	gnl|Amel|GB15355-PA	7e-81	chr|NC_007072|NC_007072.2 Chromosome LG3; [Apis mellifera] gi:110825767 chromosome 3 complete sequence	1.65e-77	chr|AMe_AADG05006193|AMe_AADG05006193.1	Linkage group 3; [Apis mellifera] draft genome, Amel_4.0.	3e-21	--	--	--	--	M
SI.CL.38.cl.3803.Contig1	gnl|Amel|GB13401-PA	1e-80	chr|NC_007075|NC_007075.2 Chromosome LG6; [Apis mellifera] gi:110825770 chromosome 6 complete sequence	9.78e-88	chr|AMe_AADG05002633|AMe_AADG05002633.1	Linkage group 6; [Apis mellifera] draft genome, Amel_4.0.	9e-06	--	--	--	--	M
SiJWD02CAH2.scf	gnl|Amel|GB11883-PA	2e-80	chr|NC_007078|NC_007078.2 Chromosome LG9; [Apis mellifera] gi:110825774 chromosome 9 complete sequence	2.77e-64	chr|AMe_AADG05003465|AMe_AADG05003465.1	Linkage group 9; [Apis mellifera] draft genome, Amel_4.0.	2e-07	--	--	--	--	M
SI.CL.25.cl.2548.Contig1	gnl|Amel|GB12042-PA	2e-80	--	--	--	--	--	--	--	--	--	M
SiJWA04CAU2.scf	gnl|Amel|GB14642-PA	4e-80	chr|NC_007076|NC_007076.2 Chromosome LG7; [Apis mellifera] gi:110825771 chromosome 7 complete sequence	2.22e-81	--	--	--	--	--	--	--	M
SI.CL.31.cl.3105.Contig1	gnl|Amel|GB12544-PA	5e-80	chr|NC_007079|NC_007079.2 Chromosome LG10; [Apis mellifera] gi:110825711 chromosome 10 complete sequence	3.02e-74	chr|AMe_AADG05005993|AMe_AADG05005993.1	Linkage group Un; [Apis mellifera] draft genome, Amel_4.0.	9e-28	ens|ENSAPMP00000014911	pep:known group:AMEL2.0:GroupUn:92885366:92887641:-1 gene:ENSAPMG00000008514 transcript:ENSAPMT00000014911	1e-70	4	M
SiJWA08BDJ.scf	gnl|Amel|GB18324-PA	7e-80	chr|NC_007070|NC_007070.2 Chromosome LG1; [Apis mellifera] gi:110825701 chromosome 1 complete sequence	3.77e-47	chr|AMe_AADG05000378|AMe_AADG05000378.1	Linkage group 1; [Apis mellifera] draft genome, Amel_4.0.	1e-11	--	--	--	--	M
SiJWF04AAD.scf	gnl|Amel|GB16315-PA	9e-80	chr|NC_007070|NC_007070.2 Chromosome LG1; [Apis mellifera] gi:110825701 chromosome 1 complete sequence	2.98e-80	chr|AMe_AADG05000377|AMe_AADG05000377.1	Linkage group 1; [Apis mellifera] draft genome, Amel_4.0.	9e-15	ens|ENSAPMP00000023032	pep:novel group:AMEL2.0:GroupUn:12004961:12005975:1 gene:ENSAPMG00000014080 transcript:ENSAPMT00000023028	9e-42	16	M
SI.CL.13.cl.1349.Contig2	gnl|Amel|GB17377-PA	1e-79	chr|NC_007071|NC_007071.2 Chromosome LG2; [Apis mellifera] gi:110825766 chromosome 2 complete sequence	8.19e-27	chr|AMe_AADG05000988|AMe_AADG05000988.1	Linkage group 2; [Apis mellifera] draft genome, Amel_4.0.	1e-14	ens|ENSAPMP00000035755	pep:novel group:AMEL2.0:Group2:6803459:6804743:-1 gene:ENSAPMG00000010299 transcript:ENSAPMT00000035755	1e-54	6	M
SiJWB08BAM.scf	gnl|Amel|GB19574-PA	2e-79	--	--	chr|AMe_AADG05008155|AMe_AADG05008155.1	Linkage group Un; [Apis mellifera] draft genome, Amel_4.0.	2e-25	--	--	--	--	M
SiJWG05ABY.scf	gnl|Amel|GB15091-PA	3e-79	chr|NC_007070|NC_007070.2 Chromosome LG1; [Apis mellifera] gi:110825701 chromosome 1 complete sequence	4.69e-75	chr|AMe_AADG05000400|AMe_AADG05000400.1	Linkage group 1; [Apis mellifera] draft genome, Amel_4.0.	5e-23	--	--	--	--	M
SI.CL.32.cl.3220.Contig1	gnl|Amel|GB18158-PA	3e-79	chr|NC_007082|NC_007082.2 Chromosome LG13; [Apis mellifera] gi:110825762 chromosome 13 complete sequence	1.06e-73	chr|AMe_AADG05004839|AMe_AADG05004839.1	Linkage group 13; [Apis mellifera] draft genome, Amel_4.0.	2e-06	--	--	--	--	M
SI.CL.38.cl.3832.Contig1	gnl|Amel|GB12590-PA	5e-79	chr|NC_007083|NC_007083.2 Chromosome LG14; [Apis mellifera] gi:110825763 chromosome 14 complete sequence	1.32e-70	--	--	--	ens|ENSAPMP00000000461	pep:novel group:AMEL2.0:Group14:2440858:2441857:1 gene:ENSAPMG00000000286 transcript:ENSAPMT00000000461	7e-48	20	M
SI.CL.41.cl.4112.Contig1	gnl|Amel|GB13898-PA	5e-79	chr|NC_007079|NC_007079.2 Chromosome LG10; [Apis mellifera] gi:110825711 chromosome 10 complete sequence	1.36e-35	chr|AMe_AADG05003938|AMe_AADG05003938.1	Linkage group 10; [Apis mellifera] draft genome, Amel_4.0.	1e-07	--	--	--	--	M
SI.CL.19.cl.1973.Contig1	gnl|Amel|GB10968-PA	5e-79	--	--	chr|AMe_AADG05009185|AMe_AADG05009185.1	Linkage group Un; [Apis mellifera] draft genome, Amel_4.0.	6e-44	--	--	--	--	M
SiJWC12ABD.scf	gnl|Amel|GB15071-PA	7e-79	--	--	chr|AMe_AADG05013189|AMe_AADG05013189.1	Linkage group Un; [Apis mellifera] draft genome, Amel_4.0.	1e-44	--	--	--	--	M
SI.CL.2.cl.204.Contig1	gnl|Amel|GB10467-PA	8e-79	chr|NC_007072|NC_007072.2 Chromosome LG3; [Apis mellifera] gi:110825767 chromosome 3 complete sequence	3.09e-80	--	--	--	--	--	--	--	M
SI.CL.0.cl.077.Contig1	gnl|Amel|GB16229-PA	2e-78	chr|NC_007079|NC_007079.2 Chromosome LG10; [Apis mellifera] gi:110825711 chromosome 10 complete sequence	4.25e-80	--	--	--	ens|ENSAPMP00000017488	pep:novel group:AMEL2.0:Group10:4892078:4892822:-1 gene:ENSAPMG00000014187 transcript:ENSAPMT00000017486	5e-52	3	M
SI.CL.37.cl.3796.Contig1	gnl|Amel|GB14341-PA	3e-78	chr|NC_007075|NC_007075.2 Chromosome LG6; [Apis mellifera] gi:110825770 chromosome 6 complete sequence	2.99e-35	chr|AMe_AADG05006170|AMe_AADG05006170.1	Linkage group 6; [Apis mellifera] draft genome, Amel_4.0.	9e-18	ens|ENSAPMP00000015660	pep:novel group:AMEL2.0:GroupUn:311948459:311949214:1 gene:ENSAPMG00000008961 transcript:ENSAPMT00000015660	2e-20	12	M
SI.CL.31.cl.3156.Contig1	gnl|Amel|GB11568-PA	4e-78	chr|NC_007084|NC_007084.2 Chromosome LG15; [Apis mellifera] gi:110825764 chromosome 15 complete sequence	7.59e-72	--	--	--	--	--	--	--	M
SI.CL.32.cl.3209.Contig1	gnl|Amel|GB10406-PA	6e-78	--	--	--	--	--	ens|ENSAPMP00000008532	pep:known group:AMEL2.0:GroupUn:30168270:30170387:1 gene:ENSAPMG00000004933 transcript:ENSAPMT00000008532	8e-76	3	M
SiJWD12BBK.scf	gnl|Amel|GB12170-PA	7e-78	--	--	chr|AMe_AADG05007460|AMe_AADG05007460.1	Linkage group Un; [Apis mellifera] draft genome, Amel_4.0.	7e-10	--	--	--	--	M
SI.CL.23.cl.2308.Contig1	gnl|Amel|GB11348-PA	9e-78	chr|NC_007072|NC_007072.2 Chromosome LG3; [Apis mellifera] gi:110825767 chromosome 3 complete sequence	9.98e-81	--	--	--	--	--	--	--	M
SI.CL.22.cl.2231.Contig1	gnl|Amel|GB15914-PA	1e-77	chr|NC_007073|NC_007073.2 Chromosome LG4; [Apis mellifera] gi:110825768 chromosome 4 complete sequence	2.75e-106	--	--	--	--	--	--	--	M
SI.CL.43.cl.4317.Contig1	gnl|Amel|GB17624-PA	2e-77	chr|NC_007073|NC_007073.2 Chromosome LG4; [Apis mellifera] gi:110825768 chromosome 4 complete sequence	4.16e-77	chr|AMe_AADG05001819|AMe_AADG05001819.1	Linkage group 4; [Apis mellifera] draft genome, Amel_4.0.	3e-06	--	--	--	--	M
SI.CL.5.cl.590.Contig1	gnl|Amel|GB15716-PA	4e-77	chr|NC_007081|NC_007081.2 Chromosome LG12; [Apis mellifera] gi:110825756 chromosome 12 complete sequence	2.17e-91	--	--	--	--	--	--	--	M
SiJWD06ACV.scf	gnl|Amel|GB19731-PA	4e-77	chr|NC_007082|NC_007082.2 Chromosome LG13; [Apis mellifera] gi:110825762 chromosome 13 complete sequence	4.12e-78	chr|AMe_AADG05004763|AMe_AADG05004763.1	Linkage group 13; [Apis mellifera] draft genome, Amel_4.0.	2e-25	--	--	--	--	M
SI.CL.40.cl.4034.Contig1	gnl|Amel|GB18892-PA	6e-77	chr|NC_007076|NC_007076.2 Chromosome LG7; [Apis mellifera] gi:110825771 chromosome 7 complete sequence	4.69e-57	chr|AMe_AADG05006136|AMe_AADG05006136.1	Linkage group 7; [Apis mellifera] draft genome, Amel_4.0.	4e-11	--	--	--	--	M
SI.CL.26.cl.2608.Contig1	gnl|Amel|GB17548-PA	7e-77	chr|NC_007080|NC_007080.2 Chromosome LG11; [Apis mellifera] gi:110825732 chromosome 11 complete sequence	2.99e-14	--	--	--	--	--	--	--	M
SiJWB06AAW.scf	gnl|Amel|GB11616-PA	7e-77	chr|NC_007072|NC_007072.2 Chromosome LG3; [Apis mellifera] gi:110825767 chromosome 3 complete sequence	8.05e-08	chr|AMe_AADG05013480|AMe_AADG05013480.1	Linkage group Un; [Apis mellifera] draft genome, Amel_4.0.	2e-16	--	--	--	--	M
SI.CL.19.cl.1902.Contig1	gnl|Amel|GB18905-PA	1e-76	chr|NC_007081|NC_007081.2 Chromosome LG12; [Apis mellifera] gi:110825756 chromosome 12 complete sequence	2.43e-76	chr|AMe_AADG05005961|AMe_AADG05005961.1	Linkage group 12; [Apis mellifera] draft genome, Amel_4.0.	7e-10	--	--	--	--	M
SI.CL.25.cl.2596.Contig1	gnl|Amel|GB10028-PA	1e-76	chr|NC_007072|NC_007072.2 Chromosome LG3; [Apis mellifera] gi:110825767 chromosome 3 complete sequence	3.15e-73	chr|AMe_AADG05001470|AMe_AADG05001470.1	Linkage group 3; [Apis mellifera] draft genome, Amel_4.0.	7e-10	ens|ENSAPMP00000001305	pep:known group:AMEL2.0:Group3:9050156:9051552:1 gene:ENSAPMG00000000778 transcript:ENSAPMT00000001305	9e-54	16	M
SI.CL.18.cl.1806.Contig1	gnl|Amel|GB12913-PA	3e-76	--	--	chr|AMe_AADG05006946|AMe_AADG05006946.1	Linkage group Un; [Apis mellifera] draft genome, Amel_4.0.	3e-22	--	--	--	--	M
SI.CL.10.cl.1031.Contig1	gnl|Amel|GB18766-PA	7e-76	--	--	--	--	--	--	--	--	--	M
SiJWE08BBK.scf	gnl|Amel|GB11225-PA	1e-75	chr|NC_007074|NC_007074.2 Chromosome LG5; [Apis mellifera] gi:110825769 chromosome 5 complete sequence	7.52e-75	--	--	--	ens|ENSAPMP00000005344	pep:known group:AMEL2.0:Group16:2434571:2437537:1 gene:ENSAPMG00000003053 transcript:ENSAPMT00000005344	4e-27	19	M
SI.CL.37.cl.3755.Contig1	gnl|Amel|GB10060-PA	1e-75	--	--	--	--	--	--	--	--	--	M
SI.CL.13.cl.1330.Contig2	gnl|Amel|GB14598-PA	2e-75	--	--	chr|AMe_AADG05006971|AMe_AADG05006971.1	Linkage group Un; [Apis mellifera] draft genome, Amel_4.0.	4e-36	--	--	--	--	M
SiJWA05BDY.scf	gnl|Amel|GB13673-PA	4e-75	chr|NC_007077|NC_007077.2 Chromosome LG8; [Apis mellifera] gi:110825772 chromosome 8 complete sequence	2.89e-83	--	--	--	--	--	--	--	M
SI.CL.34.cl.3443.Contig1	gnl|Amel|GB19538-PA	5e-75	chr|NC_007085|NC_007085.2 Chromosome LG16; [Apis mellifera] gi:110825765 chromosome 16 complete sequence	2.92e-82	--	--	--	--	--	--	--	M
SI.CL.24.cl.2459.Contig1	gnl|Amel|GB17585-PA	9e-75	--	--	--	--	--	--	--	--	--	M
SI.CL.12.cl.1206.Contig1	gnl|Amel|GB16252-PA	1e-74	chr|NC_007070|NC_007070.2 Chromosome LG1; [Apis mellifera] gi:110825701 chromosome 1 complete sequence	4.21e-28	chr|AMe_AADG05000188|AMe_AADG05000188.1	Linkage group 1; [Apis mellifera] draft genome, Amel_4.0.	1e-14	--	--	--	--	M
SI.CL.11.cl.1194.Contig1	gnl|Amel|GB18739-PA	3e-74	--	--	chr|AMe_AADG05008399|AMe_AADG05008399.1	Linkage group Un; [Apis mellifera] draft genome, Amel_4.0.	1e-38	--	--	--	--	M
SiJWA12BDI2.scf	gnl|Amel|GB17037-PA	3e-74	--	--	chr|AMe_AADG05007777|AMe_AADG05007777.1	Linkage group Un; [Apis mellifera] draft genome, Amel_4.0.	9e-25	--	--	--	--	M
SI.CL.6.cl.611.SiJWF07AAP.scf	gnl|Amel|GB19365-PA	4e-74	chr|NC_007070|NC_007070.2 Chromosome LG1; [Apis mellifera] gi:110825701 chromosome 1 complete sequence	2.09e-87	chr|AMe_AADG05000698|AMe_AADG05000698.1	Linkage group 1; [Apis mellifera] draft genome, Amel_4.0.	2e-68	ens|ENSAPMP00000031690	pep:known group:AMEL2.0:Group1:23542421:23546447:1 gene:ENSAPMG00000012333 transcript:ENSAPMT00000031689	7e-72	3	M
SI.CL.10.cl.1057.Contig1	gnl|Amel|GB20141-PA	4e-74	chr|NC_007075|NC_007075.2 Chromosome LG6; [Apis mellifera] gi:110825770 chromosome 6 complete sequence	5.72e-71	chr|AMe_AADG05002248|AMe_AADG05002248.1	Linkage group 6; [Apis mellifera] draft genome, Amel_4.0.	3e-08	--	--	--	--	M
SI.CL.21.cl.2144.Contig1	gnl|Amel|GB12744-PA	4e-74	chr|NC_007075|NC_007075.2 Chromosome LG6; [Apis mellifera] gi:110825770 chromosome 6 complete sequence	1.07e-17	chr|AMe_AADG05007673|AMe_AADG05007673.1	Linkage group Un; [Apis mellifera] draft genome, Amel_4.0.	8e-28	--	--	--	--	M
SI.CL.32.cl.3269.Contig1	gnl|Amel|GB11006-PA	5e-74	chr|NC_007084|NC_007084.2 Chromosome LG15; [Apis mellifera] gi:110825764 chromosome 15 complete sequence	6.21e-55	chr|AMe_AADG05005372|AMe_AADG05005372.1	Linkage group 15; [Apis mellifera] draft genome, Amel_4.0.	8e-30	--	--	--	--	M
SI.CL.22.cl.2291.Contig1	gnl|Amel|GB12793-PA	5e-74	--	--	chr|AMe_AADG05014187|AMe_AADG05014187.1	Linkage group Un; [Apis mellifera] draft genome, Amel_4.0.	2e-25	--	--	--	--	M
SI.CL.32.cl.3257.Contig1	gnl|Amel|GB11249-PA	8e-74	chr|NC_007073|NC_007073.2 Chromosome LG4; [Apis mellifera] gi:110825768 chromosome 4 complete sequence	4.82e-09	chr|AMe_AADG05006959|AMe_AADG05006959.1	Linkage group Un; [Apis mellifera] draft genome, Amel_4.0.	3e-11	ens|ENSAPMP00000005147	pep:known group:AMEL2.0:GroupUn:71091621:71092624:-1 gene:ENSAPMG00000002954 transcript:ENSAPMT00000005147	3e-45	16	M
SI.CL.28.cl.2842.Contig1	gnl|Amel|GB17414-PA	1e-73	chr|NC_007080|NC_007080.2 Chromosome LG11; [Apis mellifera] gi:110825732 chromosome 11 complete sequence	2.51e-83	chr|AMe_AADG05004458|AMe_AADG05004458.1	Linkage group 11; [Apis mellifera] draft genome, Amel_4.0.	2e-09	--	--	--	--	M
SiJWG05BBJ2.scf	gnl|Amel|GB15152-PA	1e-73	--	--	chr|AMe_AADG05008114|AMe_AADG05008114.1	Linkage group Un; [Apis mellifera] draft genome, Amel_4.0.	3e-24	--	--	--	--	M
SiJWB06CAD.scf	gnl|Amel|GB14268-PA	1e-73	--	--	--	--	--	--	--	--	--	M
SI.CL.17.cl.1766.Contig1	gnl|Amel|GB19410-PA	2e-73	chr|NC_007079|NC_007079.2 Chromosome LG10; [Apis mellifera] gi:110825711 chromosome 10 complete sequence	3.79e-84	--	--	--	--	--	--	--	M
SI.CL.10.cl.1040.Contig1	gnl|Amel|GB13639-PA	2e-73	chr|NC_007072|NC_007072.2 Chromosome LG3; [Apis mellifera] gi:110825767 chromosome 3 complete sequence	2.09e-78	--	--	--	--	--	--	--	M
SI.CL.35.cl.3596.Contig1	gnl|Amel|GB13023-PA	2e-73	chr|NC_007072|NC_007072.2 Chromosome LG3; [Apis mellifera] gi:110825767 chromosome 3 complete sequence	3.09e-71	chr|AMe_AADG05001391|AMe_AADG05001391.1	Linkage group 3; [Apis mellifera] draft genome, Amel_4.0.	3e-39	ens|ENSAPMP00000011947	pep:novel group:AMEL2.0:Group3:5394164:5394938:1 gene:ENSAPMG00000006859 transcript:ENSAPMT00000011947	1e-39	13	M
SI.CL.27.cl.2754.Contig2	gnl|Amel|GB12047-PA	6e-73	--	--	--	--	--	ens|ENSAPMP00000031656	pep:novel group:AMEL2.0:GroupUn:38422076:38427480:-1 gene:ENSAPMG00000012550 transcript:ENSAPMT00000031655	5e-65	2	M
SI.CL.31.cl.3182.Contig1	gnl|Amel|GB16138-PA	6e-73	--	--	--	--	--	ens|ENSAPMP00000002540	pep:known group:AMEL2.0:GroupUn:83622025:83623128:1 gene:ENSAPMG00000001469 transcript:ENSAPMT00000002540	4e-48	17	M
SiJWE11BAA2.scf	gnl|Amel|GB17809-PA	1e-72	chr|NC_007074|NC_007074.2 Chromosome LG5; [Apis mellifera] gi:110825769 chromosome 5 complete sequence	4.23e-30	--	--	--	--	--	--	--	M
SiJWG07BCO2.scf	gnl|Amel|GB12059-PA	2e-72	chr|NC_007080|NC_007080.2 Chromosome LG11; [Apis mellifera] gi:110825732 chromosome 11 complete sequence	3.42e-80	chr|AMe_AADG05004159|AMe_AADG05004159.1	Linkage group 11; [Apis mellifera] draft genome, Amel_4.0.	1e-57	ens|ENSAPMP00000016258	pep:known group:AMEL2.0:Group11:2247411:2248243:1 gene:ENSAPMG00000009298 transcript:ENSAPMT00000016258	3e-60	5	M
SI.CL.31.cl.3179.SiJWC03BBT.scf	gnl|Amel|GB10421-PA	2e-72	chr|NC_007076|NC_007076.2 Chromosome LG7; [Apis mellifera] gi:110825771 chromosome 7 complete sequence	2.2e-18	--	--	--	ens|ENSAPMP00000035708	pep:novel group:AMEL2.0:Group1:15209562:15212133:1 gene:ENSAPMG00000013050 transcript:ENSAPMT00000035708	1e-12	8	M
SiJWA03AAM.scf	gnl|Amel|GB14554-PA	2e-72	--	--	--	--	--	ens|ENSAPMP00000025713	pep:novel group:AMEL2.0:GroupUn:12956974:12957848:-1 gene:ENSAPMG00000011282 transcript:ENSAPMT00000025713	2e-41	5	M
SiJWB06AAR.scf	gnl|Amel|GB14970-PA	3e-72	chr|NC_007070|NC_007070.2 Chromosome LG1; [Apis mellifera] gi:110825701 chromosome 1 complete sequence	7.82e-79	chr|AMe_AADG05000517|AMe_AADG05000517.1	Linkage group 1; [Apis mellifera] draft genome, Amel_4.0.	6e-07	ens|ENSAPMP00000014078	pep:novel group:AMEL2.0:Group1:16087210:16176687:-1 gene:ENSAPMG00000008031 transcript:ENSAPMT00000014078	1e-35	4	M
SI.CL.41.cl.4175.Contig1	gnl|Amel|GB17886-PA	5e-72	chr|NC_007079|NC_007079.2 Chromosome LG10; [Apis mellifera] gi:110825711 chromosome 10 complete sequence	1.63e-78	chr|AMe_AADG05003818|AMe_AADG05003818.1	Linkage group 10; [Apis mellifera] draft genome, Amel_4.0.	1e-05	--	--	--	--	M
SI.CL.13.cl.1370.Contig1	gnl|Amel|GB14282-PA	8e-72	chr|NC_007084|NC_007084.2 Chromosome LG15; [Apis mellifera] gi:110825764 chromosome 15 complete sequence	4.99e-27	--	--	--	ens|ENSAPMP00000019302	pep:novel group:AMEL2.0:Group1:5160320:5162524:-1 gene:ENSAPMG00000011352 transcript:ENSAPMT00000019298	1e-25	10	M
SI.CL.23.cl.2339.Contig1	gnl|Amel|GB12948-PA	2e-71	chr|NC_007070|NC_007070.2 Chromosome LG1; [Apis mellifera] gi:110825701 chromosome 1 complete sequence	2.62e-83	chr|AMe_AADG05007627|AMe_AADG05007627.1	Linkage group Un; [Apis mellifera] draft genome, Amel_4.0.	1e-11	--	--	--	--	M
SiJWD05BBX.scf	gnl|Amel|GB10872-PA	3e-71	chr|NC_007074|NC_007074.2 Chromosome LG5; [Apis mellifera] gi:110825769 chromosome 5 complete sequence	5.38e-72	--	--	--	--	--	--	--	M
SiJWB09BDF.scf	gnl|Amel|GB13312-PA	3e-71	chr|NC_007077|NC_007077.2 Chromosome LG8; [Apis mellifera] gi:110825772 chromosome 8 complete sequence	1.55e-57	chr|AMe_AADG05003286|AMe_AADG05003286.1	Linkage group 8; [Apis mellifera] draft genome, Amel_4.0.	4e-08	ens|ENSAPMP00000035900	pep:novel group:AMEL2.0:Group4:1330883:1336130:-1 gene:ENSAPMG00000001471 transcript:ENSAPMT00000035900	7e-29	7	M
SiJWA11AAN.scf	gnl|Amel|GB16471-PA	3e-71	chr|NC_007077|NC_007077.2 Chromosome LG8; [Apis mellifera] gi:110825772 chromosome 8 complete sequence	1.02e-41	chr|AMe_AADG05003211|AMe_AADG05003211.1	Linkage group 8; [Apis mellifera] draft genome, Amel_4.0.	7e-25	--	--	--	--	M
SI.CL.9.cl.961.Contig1	gnl|Amel|GB16805-PA	4e-71	chr|NC_007072|NC_007072.2 Chromosome LG3; [Apis mellifera] gi:110825767 chromosome 3 complete sequence	1.91e-48	--	--	--	--	--	--	--	M
SI.CL.10.cl.1097.Contig1	gnl|Amel|GB13699-PA	8e-71	chr|NC_007084|NC_007084.2 Chromosome LG15; [Apis mellifera] gi:110825764 chromosome 15 complete sequence	8.83e-74	chr|AMe_AADG05005228|AMe_AADG05005228.1	Linkage group 15; [Apis mellifera] draft genome, Amel_4.0.	5e-23	--	--	--	--	M
SI.CL.11.cl.1100.Contig1	gnl|Amel|GB14706-PA	9e-71	chr|NC_007078|NC_007078.2 Chromosome LG9; [Apis mellifera] gi:110825774 chromosome 9 complete sequence	1.52e-126	chr|AMe_AADG05003466|AMe_AADG05003466.1	Linkage group 9; [Apis mellifera] draft genome, Amel_4.0.	2e-41	--	--	--	--	M
SiJWG12BAO.scf	gnl|Amel|GB13100-PA	1e-70	chr|NC_007085|NC_007085.2 Chromosome LG16; [Apis mellifera] gi:110825765 chromosome 16 complete sequence	2.13e-75	chr|AMe_AADG05007423|AMe_AADG05007423.1	Linkage group 16; [Apis mellifera] draft genome, Amel_4.0.	1e-35	--	--	--	--	M
SI.CL.8.cl.871.SiJWA02ABW.scf	gnl|Amel|GB19208-PA	1e-70	chr|NC_007080|NC_007080.2 Chromosome LG11; [Apis mellifera] gi:110825732 chromosome 11 complete sequence	6.63e-21	chr|AMe_AADG05009849|AMe_AADG05009849.1	Linkage group Un; [Apis mellifera] draft genome, Amel_4.0.	2e-10	ens|ENSAPMP00000004193	pep:novel group:AMEL2.0:GroupUn:77591107:77592363:1 gene:ENSAPMG00000002418 transcript:ENSAPMT00000004193	2e-63	3	M
SiJWA10BAY2.scf	gnl|Amel|GB13841-PA	2e-70	chr|NC_007070|NC_007070.2 Chromosome LG1; [Apis mellifera] gi:110825701 chromosome 1 complete sequence	1.24e-41	chr|AMe_AADG05000620|AMe_AADG05000620.1	Linkage group 1; [Apis mellifera] draft genome, Amel_4.0.	8e-19	--	--	--	--	M
SiJWC06ADU.scf	gnl|Amel|GB19795-PA	5e-70	chr|NC_007073|NC_007073.2 Chromosome LG4; [Apis mellifera] gi:110825768 chromosome 4 complete sequence	9.06e-71	--	--	--	ens|ENSAPMP00000002583	pep:novel group:AMEL2.0:Group4:1233388:1233986:1 gene:ENSAPMG00000001496 transcript:ENSAPMT00000002583	8e-29	15	M
SiJWC02ABD.scf	gnl|Amel|GB17520-PA	6e-70	--	--	chr|AMe_AADG05008286|AMe_AADG05008286.1	Linkage group Un; [Apis mellifera] draft genome, Amel_4.0.	3e-08	--	--	--	--	M
SI.CL.36.cl.3698.Contig1	gnl|Amel|GB17544-PA	9e-70	chr|NC_007070|NC_007070.2 Chromosome LG1; [Apis mellifera] gi:110825701 chromosome 1 complete sequence	5.07e-28	--	--	--	--	--	--	--	M
SI.CL.22.cl.2235.Contig1	gnl|Amel|GB10675-PA	1e-69	chr|NC_007080|NC_007080.2 Chromosome LG11; [Apis mellifera] gi:110825732 chromosome 11 complete sequence	1.75e-78	chr|AMe_AADG05006698|AMe_AADG05006698.1	Linkage group Un; [Apis mellifera] draft genome, Amel_4.0.	3e-33	--	--	--	--	M
SiJWF09BDB2.scf	gnl|Amel|GB10071-PA	1e-69	chr|NC_007084|NC_007084.2 Chromosome LG15; [Apis mellifera] gi:110825764 chromosome 15 complete sequence	5.48e-68	chr|AMe_AADG05006942|AMe_AADG05006942.1	Linkage group 15; [Apis mellifera] draft genome, Amel_4.0.	9e-22	ens|ENSAPMP00000034723	pep:novel group:AMEL2.0:GroupUn:21073325:21077538:1 gene:ENSAPMG00000009920 transcript:ENSAPMT00000034723	1e-37	4	M
SiJWF11BCH2.scf	gnl|Amel|GB18534-PA	1e-69	chr|NC_007074|NC_007074.2 Chromosome LG5; [Apis mellifera] gi:110825769 chromosome 5 complete sequence	1.25e-37	chr|AMe_AADG05002228|AMe_AADG05002228.1	Linkage group 5; [Apis mellifera] draft genome, Amel_4.0.	4e-33	--	--	--	--	M
SiJWF11CAA.scf	gnl|Amel|GB18897-PA	2e-69	chr|NC_007083|NC_007083.2 Chromosome LG14; [Apis mellifera] gi:110825763 chromosome 14 complete sequence	2.25e-66	chr|AMe_AADG05005001|AMe_AADG05005001.1	Linkage group 14; [Apis mellifera] draft genome, Amel_4.0.	1e-26	--	--	--	--	M
SI.CL.38.cl.3897.Contig1	gnl|Amel|GB16209-PA	3e-69	chr|NC_007085|NC_007085.2 Chromosome LG16; [Apis mellifera] gi:110825765 chromosome 16 complete sequence	2.65e-28	--	--	--	--	--	--	--	M
SiJWB09AAJ.scf	gnl|Amel|GB12838-PA	4e-69	chr|NC_007080|NC_007080.2 Chromosome LG11; [Apis mellifera] gi:110825732 chromosome 11 complete sequence	1.74e-72	chr|AMe_AADG05004108|AMe_AADG05004108.1	Linkage group 11; [Apis mellifera] draft genome, Amel_4.0.	4e-70	--	--	--	--	M
SiJWH05BCU2.scf	gnl|Amel|GB14059-PA	4e-69	--	--	chr|AMe_AADG05008076|AMe_AADG05008076.1	Linkage group Un; [Apis mellifera] draft genome, Amel_4.0.	8e-19	--	--	--	--	M
SI.CL.12.cl.1281.Contig1	gnl|Amel|GB16389-PA	6e-69	chr|NC_007074|NC_007074.2 Chromosome LG5; [Apis mellifera] gi:110825769 chromosome 5 complete sequence	3.42e-74	--	--	--	--	--	--	--	M
SI.CL.3.cl.373.Contig1	gnl|Amel|GB11216-PA	8e-69	chr|NC_007076|NC_007076.2 Chromosome LG7; [Apis mellifera] gi:110825771 chromosome 7 complete sequence	2.24e-60	chr|AMe_AADG05007083|AMe_AADG05007083.1	Linkage group 13; [Apis mellifera] draft genome, Amel_4.0.	1e-21	--	--	--	--	M
SiJWC09ABT.scf	gnl|Amel|GB16655-PA	8e-69	chr|NC_007070|NC_007070.2 Chromosome LG1; [Apis mellifera] gi:110825701 chromosome 1 complete sequence	4.89e-59	--	--	--	ens|ENSAPMP00000009267	pep:novel group:AMEL2.0:Group1:19392932:19393583:-1 gene:ENSAPMG00000005344 transcript:ENSAPMT00000009267	3e-26	5	M
SI.CL.34.cl.3406.Contig1	gnl|Amel|GB16460-PA	1e-68	chr|NC_007070|NC_007070.2 Chromosome LG1; [Apis mellifera] gi:110825701 chromosome 1 complete sequence	8.09e-11	chr|AMe_AADG05007562|AMe_AADG05007562.1	Linkage group Un; [Apis mellifera] draft genome, Amel_4.0.	2e-06	ens|ENSAPMP00000002942	pep:known group:AMEL2.0:GroupUn:56046129:56051367:-1 gene:ENSAPMG00000001717 transcript:ENSAPMT00000002942	5e-65	20	M
SI.CL.39.cl.3930.SiJWG12AA1.tag5_G12_14.scf	gnl|Amel|GB19831-PA	2e-68	chr|NC_007070|NC_007070.2 Chromosome LG1; [Apis mellifera] gi:110825701 chromosome 1 complete sequence	7.68e-12	chr|AMe_AADG05016120|AMe_AADG05016120.1	Linkage group Un; [Apis mellifera] draft genome, Amel_4.0.	1e-14	ens|ENSAPMP00000023111	pep:novel group:AMEL2.0:Group1:9956287:9979906:1 gene:ENSAPMG00000001145 transcript:ENSAPMT00000023107	5e-30	8	M
SiJWD05BAO.scf	gnl|Amel|GB15902-PA	2e-68	chr|NC_007072|NC_007072.2 Chromosome LG3; [Apis mellifera] gi:110825767 chromosome 3 complete sequence	7.93e-11	chr|AMe_AADG05009098|AMe_AADG05009098.1	Linkage group Un; [Apis mellifera] draft genome, Amel_4.0.	6e-10	--	--	--	--	M
SI.CL.15.cl.1589.Contig1	gnl|Amel|GB18772-PA	2e-68	--	--	chr|AMe_AADG05011230|AMe_AADG05011230.1	Linkage group Un; [Apis mellifera] draft genome, Amel_4.0.	7e-25	--	--	--	--	M
SI.CL.26.cl.2664.SiJWB08BAL.scf	gnl|Amel|GB10881-PA	3e-68	chr|NC_007076|NC_007076.2 Chromosome LG7; [Apis mellifera] gi:110825771 chromosome 7 complete sequence	4.02e-69	chr|AMe_AADG05005852|AMe_AADG05005852.1	Linkage group 7; [Apis mellifera] draft genome, Amel_4.0.	6e-10	--	--	--	--	M
SiJWD05ADF.scf	gnl|Amel|GB19610-PA	3e-68	chr|NC_007070|NC_007070.2 Chromosome LG1; [Apis mellifera] gi:110825701 chromosome 1 complete sequence	2.35e-42	--	--	--	--	--	--	--	M
SI.CL.4.cl.494.Contig1	gnl|Amel|GB15726-PA	3e-68	--	--	chr|AMe_AADG05013382|AMe_AADG05013382.1	Linkage group Un; [Apis mellifera] draft genome, Amel_4.0.	4e-17	--	--	--	--	M
SiJWD01ABB.scf	gnl|Amel|GB15068-PA	4e-68	chr|NC_007070|NC_007070.2 Chromosome LG1; [Apis mellifera] gi:110825701 chromosome 1 complete sequence	7.3e-37	--	--	--	--	--	--	--	M
SI.CL.24.cl.2489.Contig1	gnl|Amel|GB15570-PA	6e-68	chr|NC_007079|NC_007079.2 Chromosome LG10; [Apis mellifera] gi:110825711 chromosome 10 complete sequence	2.51e-47	--	--	--	--	--	--	--	M
SI.CL.42.cl.4233.Contig1	gnl|Amel|GB13397-PA	6e-68	chr|NC_007078|NC_007078.2 Chromosome LG9; [Apis mellifera] gi:110825774 chromosome 9 complete sequence	1.24e-42	--	--	--	ens|ENSAPMP00000005933	pep:novel group:AMEL2.0:Group9:9641696:9659050:1 gene:ENSAPMG00000003376 transcript:ENSAPMT00000005933	2e-18	8	M
SiJWD05BCS2.scf	gnl|Amel|GB13182-PA	7e-68	chr|NC_007073|NC_007073.2 Chromosome LG4; [Apis mellifera] gi:110825768 chromosome 4 complete sequence	1.87e-59	chr|AMe_AADG05001563|AMe_AADG05001563.1	Linkage group 4; [Apis mellifera] draft genome, Amel_4.0.	4e-08	--	--	--	--	M
SiJWE07BDV2.scf	gnl|Amel|GB15109-PA	7e-68	chr|NC_007079|NC_007079.2 Chromosome LG10; [Apis mellifera] gi:110825711 chromosome 10 complete sequence	1.05e-40	chr|AMe_AADG05003740|AMe_AADG05003740.1	Linkage group 10; [Apis mellifera] draft genome, Amel_4.0.	9e-28	--	--	--	--	M
SI.CL.22.cl.2232.SiJWH06BBA.tag5_H02_16.scf	gnl|Amel|GB17833-PA	8e-68	--	--	--	--	--	--	--	--	--	M
SI.CL.25.cl.2524.SiJWD10BAW2.scf	gnl|Amel|GB15036-PA	2e-67	chr|NC_007075|NC_007075.2 Chromosome LG6; [Apis mellifera] gi:110825770 chromosome 6 complete sequence	3.89e-79	chr|AMe_AADG05002316|AMe_AADG05002316.1	Linkage group 6; [Apis mellifera] draft genome, Amel_4.0.	8e-13	--	--	--	--	M
SiJWF09ADG.scf	gnl|Amel|GB11533-PA	2e-67	chr|NC_007070|NC_007070.2 Chromosome LG1; [Apis mellifera] gi:110825701 chromosome 1 complete sequence	4.15e-41	--	--	--	--	--	--	--	M
SI.CL.28.cl.2834.Contig1	gnl|Amel|GB10191-PA	2e-67	chr|NC_007074|NC_007074.2 Chromosome LG5; [Apis mellifera] gi:110825769 chromosome 5 complete sequence	1.04e-31	chr|AMe_AADG05001988|AMe_AADG05001988.1	Linkage group 5; [Apis mellifera] draft genome, Amel_4.0.	4e-12	--	--	--	--	M
SI.CL.10.cl.1031.Contig2	gnl|Amel|GB18766-PA	2e-67	--	--	chr|AMe_AADG05009248|AMe_AADG05009248.1	Linkage group Un; [Apis mellifera] draft genome, Amel_4.0.	6e-07	ens|ENSAPMP00000027078	pep:novel group:AMEL2.0:GroupUn:101374328:101376429:1 gene:ENSAPMG00000010416 transcript:ENSAPMT00000027076	1e-43	6	M
SiJWH01ABM.scf	gnl|Amel|GB11498-PA	2e-67	--	--	--	--	--	ens|ENSAPMP00000026416	pep:novel group:AMEL2.0:GroupUn:132685616:132688758:-1 gene:ENSAPMG00000012474 transcript:ENSAPMT00000026416	5e-38	8	M
SI.CL.25.cl.2502.Contig1	gnl|Amel|GB18768-PA	3e-67	chr|NC_007077|NC_007077.2 Chromosome LG8; [Apis mellifera] gi:110825772 chromosome 8 complete sequence	1.95e-69	chr|AMe_AADG05003087|AMe_AADG05003087.1	Linkage group 8; [Apis mellifera] draft genome, Amel_4.0.	7e-63	--	--	--	--	M
SI.CL.19.cl.1957.Contig1	gnl|Amel|GB16051-PA	3e-67	chr|NC_007085|NC_007085.2 Chromosome LG16; [Apis mellifera] gi:110825765 chromosome 16 complete sequence	6.81e-50	--	--	--	--	--	--	--	M
SI.CL.20.cl.2047.Contig1	gnl|Amel|GB17909-PA	3e-67	chr|NC_007075|NC_007075.2 Chromosome LG6; [Apis mellifera] gi:110825770 chromosome 6 complete sequence	1.5e-31	chr|AMe_AADG05002383|AMe_AADG05002383.1	Linkage group 6; [Apis mellifera] draft genome, Amel_4.0.	2e-07	--	--	--	--	M
SI.CL.9.cl.992.SiJWC04ACU.scf	gnl|Amel|GB11482-PA	5e-67	chr|NC_007076|NC_007076.2 Chromosome LG7; [Apis mellifera] gi:110825771 chromosome 7 complete sequence	3.96e-17	chr|AMe_AADG05008898|AMe_AADG05008898.1	Linkage group Un; [Apis mellifera] draft genome, Amel_4.0.	4e-23	ens|ENSAPMP00000000192	pep:known group:AMEL2.0:GroupUn:72172159:72173191:-1 gene:ENSAPMG00000000118 transcript:ENSAPMT00000000192	6e-79	2	M
SiJWB12AAZ.scf	gnl|Amel|GB14211-PA	7e-67	chr|NC_007079|NC_007079.2 Chromosome LG10; [Apis mellifera] gi:110825711 chromosome 10 complete sequence	9.88e-70	--	--	--	--	--	--	--	M
SI.CL.9.cl.926.Contig1	gnl|Amel|GB11040-PA	1e-66	chr|NC_007070|NC_007070.2 Chromosome LG1; [Apis mellifera] gi:110825701 chromosome 1 complete sequence	4.16e-75	chr|AMe_AADG05000441|AMe_AADG05000441.1	Linkage group 1; [Apis mellifera] draft genome, Amel_4.0.	3e-18	--	--	--	--	M
SI.CL.41.cl.4140.Contig1	gnl|Amel|GB17081-PA	1e-66	chr|NC_007080|NC_007080.2 Chromosome LG11; [Apis mellifera] gi:110825732 chromosome 11 complete sequence	1.38e-59	chr|AMe_AADG05004348|AMe_AADG05004348.1	Linkage group 11; [Apis mellifera] draft genome, Amel_4.0.	3e-82	--	--	--	--	M
SI.CL.7.cl.745.Contig1	gnl|Amel|GB16603-PA	2e-66	chr|NC_007079|NC_007079.2 Chromosome LG10; [Apis mellifera] gi:110825711 chromosome 10 complete sequence	1.07e-70	chr|AMe_AADG05006612|AMe_AADG05006612.1	Linkage group 10; [Apis mellifera] draft genome, Amel_4.0.	5e-10	--	--	--	--	M
SiJWA04BAG.scf	gnl|Amel|GB16285-PA	3e-66	chr|NC_007070|NC_007070.2 Chromosome LG1; [Apis mellifera] gi:110825701 chromosome 1 complete sequence	7.67e-77	--	--	--	--	--	--	--	M
SiJWA01BBZ.scf	gnl|Amel|GB12265-PA	4e-66	chr|NC_007070|NC_007070.2 Chromosome LG1; [Apis mellifera] gi:110825701 chromosome 1 complete sequence	1.68e-75	chr|AMe_AADG05005723|AMe_AADG05005723.1	Linkage group 1; [Apis mellifera] draft genome, Amel_4.0.	2e-13	--	--	--	--	M
SI.CL.17.cl.1747.Contig1	gnl|Amel|GB14652-PA	4e-66	chr|NC_007071|NC_007071.2 Chromosome LG2; [Apis mellifera] gi:110825766 chromosome 2 complete sequence	4.5e-56	chr|AMe_AADG05001047|AMe_AADG05001047.1	Linkage group 2; [Apis mellifera] draft genome, Amel_4.0.	1e-05	ens|ENSAPMP00000002512	pep:novel group:AMEL2.0:Group2:10237151:10238174:1 gene:ENSAPMG00000001450 transcript:ENSAPMT00000002512	2e-32	3	M
SI.CL.19.cl.1919.Contig1	gnl|Amel|GB14106-PA	4e-66	chr|NC_007080|NC_007080.2 Chromosome LG11; [Apis mellifera] gi:110825732 chromosome 11 complete sequence	1.25e-52	chr|AMe_AADG05004122|AMe_AADG05004122.1	Linkage group 11; [Apis mellifera] draft genome, Amel_4.0.	2e-08	--	--	--	--	M
SiJWH06ABN.scf	gnl|Amel|GB18704-PA	5e-66	chr|NC_007079|NC_007079.2 Chromosome LG10; [Apis mellifera] gi:110825711 chromosome 10 complete sequence	1.33e-67	chr|AMe_AADG05003955|AMe_AADG05003955.1	Linkage group 10; [Apis mellifera] draft genome, Amel_4.0.	2e-40	--	--	--	--	M
SI.CL.11.cl.1156.Contig1	gnl|Amel|GB15167-PA	6e-66	chr|NC_007079|NC_007079.2 Chromosome LG10; [Apis mellifera] gi:110825711 chromosome 10 complete sequence	1.2e-61	chr|AMe_AADG05004002|AMe_AADG05004002.1	Linkage group 10; [Apis mellifera] draft genome, Amel_4.0.	9e-06	--	--	--	--	M
SI.CL.23.cl.2359.Contig1	gnl|Amel|GB16307-PA	8e-66	chr|NC_007077|NC_007077.2 Chromosome LG8; [Apis mellifera] gi:110825772 chromosome 8 complete sequence	1.7e-56	--	--	--	--	--	--	--	M
SI.CL.14.cl.1456.Contig1	gnl|Amel|GB18169-PA	9e-66	chr|NC_007070|NC_007070.2 Chromosome LG1; [Apis mellifera] gi:110825701 chromosome 1 complete sequence	2.19e-29	chr|AMe_AADG05008422|AMe_AADG05008422.1	Linkage group 1; [Apis mellifera] draft genome, Amel_4.0.	7e-26	--	--	--	--	M
SiJWH04BAB.scf	gnl|Amel|GB11356-PA	2e-65	chr|NC_007078|NC_007078.2 Chromosome LG9; [Apis mellifera] gi:110825774 chromosome 9 complete sequence	3.87e-54	--	--	--	--	--	--	--	M
SiJWC02BCR.scf	gnl|Amel|GB13240-PA	3e-65	chr|NC_007077|NC_007077.2 Chromosome LG8; [Apis mellifera] gi:110825772 chromosome 8 complete sequence	1.5e-74	--	--	--	--	--	--	--	M
SiJWB11BBB.scf	gnl|Amel|GB13423-PA	3e-65	chr|NC_007083|NC_007083.2 Chromosome LG14; [Apis mellifera] gi:110825763 chromosome 14 complete sequence	5.52e-46	chr|AMe_AADG05005112|AMe_AADG05005112.1	Linkage group 14; [Apis mellifera] draft genome, Amel_4.0.	3e-21	--	--	--	--	M
SI.CL.22.cl.2287.Contig1	gnl|Amel|GB14402-PA	3e-65	chr|NC_007085|NC_007085.2 Chromosome LG16; [Apis mellifera] gi:110825765 chromosome 16 complete sequence	7.02e-20	chr|AMe_AADG05013057|AMe_AADG05013057.1	Linkage group Un; [Apis mellifera] draft genome, Amel_4.0.	2e-14	--	--	--	--	M
SI.CL.9.cl.919.Contig1	gnl|Amel|GB10275-PA	4e-65	chr|NC_007073|NC_007073.2 Chromosome LG4; [Apis mellifera] gi:110825768 chromosome 4 complete sequence	6.22e-77	chr|AMe_AADG05001594|AMe_AADG05001594.1	Linkage group 4; [Apis mellifera] draft genome, Amel_4.0.	3e-92	ens|ENSAPMP00000031485	pep:novel group:AMEL2.0:Group4:1316510:1318003:1 gene:ENSAPMG00000014585 transcript:ENSAPMT00000031484	6e-63	7	M
SiJWG03AAQ.scf	gnl|Amel|GB15101-PA	5e-65	chr|NC_007073|NC_007073.2 Chromosome LG4; [Apis mellifera] gi:110825768 chromosome 4 complete sequence	2.7e-67	chr|AMe_AADG05001592|AMe_AADG05001592.1	Linkage group 4; [Apis mellifera] draft genome, Amel_4.0.	7e-13	--	--	--	--	M
SI.CL.5.cl.548.Contig1	gnl|Amel|GB14842-PA	5e-65	--	--	chr|AMe_AADG05008693|AMe_AADG05008693.1	Linkage group Un; [Apis mellifera] draft genome, Amel_4.0.	1e-07	ens|ENSAPMP00000028223	pep:novel group:AMEL2.0:GroupUn:48554007:48554975:-1 gene:ENSAPMG00000010358 transcript:ENSAPMT00000028222	3e-43	4	M
SiJWA04CAF2.scf	gnl|Amel|GB12238-PA	8e-65	chr|NC_007080|NC_007080.2 Chromosome LG11; [Apis mellifera] gi:110825732 chromosome 11 complete sequence	4.94e-60	chr|AMe_AADG05004193|AMe_AADG05004193.1	Linkage group 11; [Apis mellifera] draft genome, Amel_4.0.	3e-09	--	--	--	--	M
SI.CL.20.cl.2051.SiJWG02ADC.scf	gnl|Amel|GB16474-PA	1e-64	chr|NC_007079|NC_007079.2 Chromosome LG10; [Apis mellifera] gi:110825711 chromosome 10 complete sequence	3.88e-37	chr|AMe_AADG05003826|AMe_AADG05003826.1	Linkage group 10; [Apis mellifera] draft genome, Amel_4.0.	8e-19	--	--	--	--	M
SiJWH06BBN2.scf	gnl|Amel|GB12640-PA	1e-64	--	--	chr|AMe_AADG05008718|AMe_AADG05008718.1	Linkage group Un; [Apis mellifera] draft genome, Amel_4.0.	6e-13	--	--	--	--	M
SI.CL.6.cl.670.Contig1	gnl|Amel|GB12776-PA	1e-64	--	--	--	--	--	--	--	--	--	M
SiJWF12ADJ.scf	gnl|Amel|GB19950-PA	2e-64	chr|NC_007077|NC_007077.2 Chromosome LG8; [Apis mellifera] gi:110825772 chromosome 8 complete sequence	7.47e-76	chr|AMe_AADG05003081|AMe_AADG05003081.1	Linkage group 8; [Apis mellifera] draft genome, Amel_4.0.	5e-29	ens|ENSAPMP00000005784	pep:known group:AMEL2.0:Group8:2855574:2856215:1 gene:ENSAPMG00000003301 transcript:ENSAPMT00000005784	6e-50	5	M
SiJWC08ADG.scf	gnl|Amel|GB17534-PA	4e-64	chr|NC_007072|NC_007072.2 Chromosome LG3; [Apis mellifera] gi:110825767 chromosome 3 complete sequence	2.51e-32	chr|AMe_AADG05006194|AMe_AADG05006194.1	Linkage group 3; [Apis mellifera] draft genome, Amel_4.0.	4e-39	ens|ENSAPMP00000032651	pep:novel group:AMEL2.0:GroupUn:16348587:16353273:1 gene:ENSAPMG00000015796 transcript:ENSAPMT00000032652	9e-68	5	M
SI.CL.20.cl.2055.Contig1	gnl|Amel|GB17512-PA	4e-64	--	--	--	--	--	ens|ENSAPMP00000032973	pep:novel group:AMEL2.0:GroupUn:49827758:49828550:-1 gene:ENSAPMG00000010703 transcript:ENSAPMT00000032973	1e-36	20	M
SI.CL.15.cl.1599.Contig1	gnl|Amel|GB14031-PA	4e-64	--	--	--	--	--	--	--	--	--	M
SI.CL.42.cl.4245.Contig1	gnl|Amel|GB11272-PA	5e-64	chr|NC_007084|NC_007084.2 Chromosome LG15; [Apis mellifera] gi:110825764 chromosome 15 complete sequence	3.2e-08	chr|AMe_AADG05006536|AMe_AADG05006536.1	Linkage group Un; [Apis mellifera] draft genome, Amel_4.0.	6e-13	--	--	--	--	M
SI.CL.0.cl.031.Contig1	gnl|Amel|GB11456-PA	8e-64	chr|NC_007081|NC_007081.2 Chromosome LG12; [Apis mellifera] gi:110825756 chromosome 12 complete sequence	6.73e-19	--	--	--	--	--	--	--	M
SiJWB09ADL.scf	gnl|Amel|GB15954-PA	1e-63	chr|NC_007074|NC_007074.2 Chromosome LG5; [Apis mellifera] gi:110825769 chromosome 5 complete sequence	3.71e-87	chr|AMe_AADG05001948|AMe_AADG05001948.1	Linkage group 5; [Apis mellifera] draft genome, Amel_4.0.	2e-53	--	--	--	--	M
SI.CL.15.cl.1544.Contig1	gnl|Amel|GB11856-PA	1e-63	chr|NC_007073|NC_007073.2 Chromosome LG4; [Apis mellifera] gi:110825768 chromosome 4 complete sequence	1.19e-58	chr|AMe_AADG05001759|AMe_AADG05001759.1	Linkage group 4; [Apis mellifera] draft genome, Amel_4.0.	1e-50	ens|ENSAPMP00000022899	pep:novel group:AMEL2.0:Group4:7862914:7865361:-1 gene:ENSAPMG00000012173 transcript:ENSAPMT00000022895	1e-61	3	M
SI.CL.31.cl.3103.Contig1	gnl|Amel|GB16091-PA	1e-63	chr|NC_007072|NC_007072.2 Chromosome LG3; [Apis mellifera] gi:110825767 chromosome 3 complete sequence	4.35e-29	chr|AMe_AADG05001460|AMe_AADG05001460.1	Linkage group 3; [Apis mellifera] draft genome, Amel_4.0.	6e-19	ens|ENSAPMP00000006098	pep:novel group:AMEL2.0:Group3:8496960:8497567:1 gene:ENSAPMG00000003470 transcript:ENSAPMT00000006098	2e-38	19	M
SiJWB04BAW2.scf	gnl|Amel|GB20119-PA	2e-63	chr|NC_007077|NC_007077.2 Chromosome LG8; [Apis mellifera] gi:110825772 chromosome 8 complete sequence	2.78e-69	chr|AMe_AADG05007005|AMe_AADG05007005.1	Linkage group 8; [Apis mellifera] draft genome, Amel_4.0.	1e-33	--	--	--	--	M
SI.CL.5.cl.557.Contig1	gnl|Amel|GB11510-PA	2e-63	chr|NC_007072|NC_007072.2 Chromosome LG3; [Apis mellifera] gi:110825767 chromosome 3 complete sequence	1.13e-59	chr|AMe_AADG05008776|AMe_AADG05008776.1	Linkage group 3; [Apis mellifera] draft genome, Amel_4.0.	2e-25	--	--	--	--	M
SiJWE01AAY.scf	gnl|Amel|GB11820-PA	2e-63	--	--	chr|AMe_AADG05016369|AMe_AADG05016369.1	Linkage group Un; [Apis mellifera] draft genome, Amel_4.0.	4e-08	ens|ENSAPMP00000035338	pep:known group:AMEL2.0:GroupUn:217001685:217003075:-1 gene:ENSAPMG00000009761 transcript:ENSAPMT00000035339	3e-18	19	M
SI.CL.7.cl.737.Contig1	gnl|Amel|GB14252-PA	3e-63	chr|NC_007075|NC_007075.2 Chromosome LG6; [Apis mellifera] gi:110825770 chromosome 6 complete sequence	5.58e-69	chr|AMe_AADG05002429|AMe_AADG05002429.1	Linkage group 6; [Apis mellifera] draft genome, Amel_4.0.	4e-11	--	--	--	--	M
SI.CL.10.cl.1090.Contig1	gnl|Amel|GB15954-PA	3e-63	chr|NC_007074|NC_007074.2 Chromosome LG5; [Apis mellifera] gi:110825769 chromosome 5 complete sequence	9.02e-61	chr|AMe_AADG05001948|AMe_AADG05001948.1	Linkage group 5; [Apis mellifera] draft genome, Amel_4.0.	2e-28	--	--	--	--	M
SiJWF11ACH.scf	gnl|Amel|GB16883-PA	3e-63	chr|NC_007078|NC_007078.2 Chromosome LG9; [Apis mellifera] gi:110825774 chromosome 9 complete sequence	1.7e-60	--	--	--	ens|ENSAPMP00000035432	pep:novel group:AMEL2.0:Group8:1580044:1590663:1 gene:ENSAPMG00000008526 transcript:ENSAPMT00000035433	4e-61	9	M
SI.CL.3.cl.308.Contig1	gnl|Amel|GB18639-PA	3e-63	--	--	chr|AMe_AADG05007607|AMe_AADG05007607.1	Linkage group Un; [Apis mellifera] draft genome, Amel_4.0.	4e-23	--	--	--	--	M
SI.CL.13.cl.1355.Contig1	gnl|Amel|GB19139-PA	4e-63	chr|NC_007079|NC_007079.2 Chromosome LG10; [Apis mellifera] gi:110825711 chromosome 10 complete sequence	1.04e-32	chr|AMe_AADG05003740|AMe_AADG05003740.1	Linkage group 10; [Apis mellifera] draft genome, Amel_4.0.	2e-06	--	--	--	--	M
SI.CL.16.cl.1653.Contig1	gnl|Amel|GB10512-PA	5e-63	--	--	--	--	--	--	--	--	--	M
SI.CL.16.cl.1643.Contig1	gnl|Amel|GB10739-PA	6e-63	chr|NC_007084|NC_007084.2 Chromosome LG15; [Apis mellifera] gi:110825764 chromosome 15 complete sequence	1.99e-59	--	--	--	--	--	--	--	M
SI.CL.39.cl.3956.Contig1	gnl|Amel|GB19428-PA	6e-63	--	--	chr|AMe_AADG05009718|AMe_AADG05009718.1	Linkage group Un; [Apis mellifera] draft genome, Amel_4.0.	3e-27	--	--	--	--	M
SI.CL.3.cl.308.SiJWF10BCJ3.scf	gnl|Amel|GB18639-PA	8e-63	--	--	chr|AMe_AADG05007607|AMe_AADG05007607.1	Linkage group Un; [Apis mellifera] draft genome, Amel_4.0.	6e-23	--	--	--	--	M
SI.CL.22.cl.2281.Contig1	gnl|Amel|GB19442-PA	9e-63	chr|NC_007072|NC_007072.2 Chromosome LG3; [Apis mellifera] gi:110825767 chromosome 3 complete sequence	2.96e-42	chr|AMe_AADG05001324|AMe_AADG05001324.1	Linkage group 3; [Apis mellifera] draft genome, Amel_4.0.	5e-37	ens|ENSAPMP00000009198	pep:novel group:AMEL2.0:Group3:3259125:3259734:1 gene:ENSAPMG00000005307 transcript:ENSAPMT00000009198	5e-58	13	M
SiJWF09ACO.scf	gnl|Amel|GB13061-PA	1e-62	chr|NC_007083|NC_007083.2 Chromosome LG14; [Apis mellifera] gi:110825763 chromosome 14 complete sequence	8.79e-89	chr|AMe_AADG05005009|AMe_AADG05005009.1	Linkage group 14; [Apis mellifera] draft genome, Amel_4.0.	2e-09	--	--	--	--	M
SI.CL.20.cl.2011.Contig1	gnl|Amel|GB17275-PA	1e-62	chr|NC_007072|NC_007072.2 Chromosome LG3; [Apis mellifera] gi:110825767 chromosome 3 complete sequence	1.64e-58	chr|AMe_AADG05001309|AMe_AADG05001309.1	Linkage group 3; [Apis mellifera] draft genome, Amel_4.0.	2e-12	--	--	--	--	M
SiJWC05BAI.scf	gnl|Amel|GB14539-PA	1e-62	chr|NC_007074|NC_007074.2 Chromosome LG5; [Apis mellifera] gi:110825769 chromosome 5 complete sequence	2.43e-55	--	--	--	ens|ENSAPMP00000010334	pep:known group:AMEL2.0:Group5:8868182:8869111:1 gene:ENSAPMG00000005978 transcript:ENSAPMT00000010334	3e-31	20	M
SiJWC07BAD.scf	gnl|Amel|GB11200-PA	2e-62	chr|NC_007074|NC_007074.2 Chromosome LG5; [Apis mellifera] gi:110825769 chromosome 5 complete sequence	4.38e-49	--	--	--	--	--	--	--	M
SI.CL.11.cl.1101.Contig1	gnl|Amel|GB13068-PA	3e-62	chr|NC_007072|NC_007072.2 Chromosome LG3; [Apis mellifera] gi:110825767 chromosome 3 complete sequence	1.28e-65	chr|AMe_AADG05001396|AMe_AADG05001396.1	Linkage group 3; [Apis mellifera] draft genome, Amel_4.0.	9e-31	ens|ENSAPMP00000015339	pep:novel group:AMEL2.0:Group3:5466425:5467018:-1 gene:ENSAPMG00000008762 transcript:ENSAPMT00000015339	2e-46	10	M
SiJWC12BDF.scf	gnl|Amel|GB12471-PA	3e-62	chr|NC_007079|NC_007079.2 Chromosome LG10; [Apis mellifera] gi:110825711 chromosome 10 complete sequence	5.62e-51	chr|AMe_AADG05006612|AMe_AADG05006612.1	Linkage group 10; [Apis mellifera] draft genome, Amel_4.0.	4e-33	--	--	--	--	M
SI.CL.13.cl.1376.Contig1	gnl|Amel|GB18392-PA	4e-62	chr|NC_007083|NC_007083.2 Chromosome LG14; [Apis mellifera] gi:110825763 chromosome 14 complete sequence	4.48e-51	--	--	--	--	--	--	--	M
SI.CL.18.cl.1858.Contig1	gnl|Amel|GB17146-PA	4e-62	--	--	chr|AMe_AADG05009393|AMe_AADG05009393.1	Linkage group Un; [Apis mellifera] draft genome, Amel_4.0.	6e-06	--	--	--	--	M
SI.CL.28.cl.2860.Contig1	gnl|Amel|GB18288-PA	5e-62	chr|NC_007081|NC_007081.2 Chromosome LG12; [Apis mellifera] gi:110825756 chromosome 12 complete sequence	7.11e-62	chr|AMe_AADG05005815|AMe_AADG05005815.1	Linkage group 12; [Apis mellifera] draft genome, Amel_4.0.	5e-16	--	--	--	--	M
SiJWH05AAY.scf	gnl|Amel|GB14282-PA	5e-62	chr|NC_007084|NC_007084.2 Chromosome LG15; [Apis mellifera] gi:110825764 chromosome 15 complete sequence	7.29e-22	--	--	--	ens|ENSAPMP00000035751	pep:novel group:AMEL2.0:Group1:5160320:5162539:-1 gene:ENSAPMG00000011352 transcript:ENSAPMT00000035751	5e-19	12	M
SI.CL.19.cl.1936.Contig1	gnl|Amel|GB17021-PA	7e-62	chr|NC_007076|NC_007076.2 Chromosome LG7; [Apis mellifera] gi:110825771 chromosome 7 complete sequence	2.71e-75	--	--	--	--	--	--	--	M
SI.CL.32.cl.3299.Contig1	gnl|Amel|GB10304-PA	8e-62	chr|NC_007079|NC_007079.2 Chromosome LG10; [Apis mellifera] gi:110825711 chromosome 10 complete sequence	1.07e-61	--	--	--	--	--	--	--	M
SI.CL.12.cl.1207.Contig1	gnl|Amel|GB11561-PA	8e-62	--	--	chr|AMe_AADG05006037|AMe_AADG05006037.1	Linkage group Un; [Apis mellifera] draft genome, Amel_4.0.	9e-10	ens|ENSAPMP00000029128	pep:novel group:AMEL2.0:GroupUn:21319731:21320279:-1 gene:ENSAPMG00000016350 transcript:ENSAPMT00000029128	4e-37	19	M
SI.CL.26.cl.2615.Contig1	gnl|Amel|GB11144-PA	1e-61	chr|NC_007076|NC_007076.2 Chromosome LG7; [Apis mellifera] gi:110825771 chromosome 7 complete sequence	9.1e-73	--	--	--	--	--	--	--	M
SiJWD09BDY.scf	gnl|Amel|GB13208-PA	1e-61	chr|NC_007073|NC_007073.2 Chromosome LG4; [Apis mellifera] gi:110825768 chromosome 4 complete sequence	1.94e-41	--	--	--	ens|ENSAPMP00000019744	pep:known group:AMEL2.0:GroupUn:9518109:9518474:-1 gene:ENSAPMG00000014563 transcript:ENSAPMT00000019739	3e-09	11	M
SiJWG05ACF.scf	gnl|Amel|GB14869-PA	2e-61	chr|NC_007074|NC_007074.2 Chromosome LG5; [Apis mellifera] gi:110825769 chromosome 5 complete sequence	1.66e-66	--	--	--	--	--	--	--	M
SI.CL.14.cl.1469.Contig1	gnl|Amel|GB14612-PA	2e-61	chr|NC_007083|NC_007083.2 Chromosome LG14; [Apis mellifera] gi:110825763 chromosome 14 complete sequence	5.03e-38	--	--	--	ens|ENSAPMP00000020196	pep:novel group:AMEL2.0:GroupUn:80933442:80938149:1 gene:ENSAPMG00000013247 transcript:ENSAPMT00000020191	3e-56	2	M
SI.CL.12.cl.1231.Contig1	gnl|Amel|GB14262-PA	4e-61	--	--	chr|AMe_AADG05006364|AMe_AADG05006364.1	Linkage group Un; [Apis mellifera] draft genome, Amel_4.0.	7e-09	--	--	--	--	M
SiJWB04ACN.scf	gnl|Amel|GB15658-PA	5e-61	chr|NC_007073|NC_007073.2 Chromosome LG4; [Apis mellifera] gi:110825768 chromosome 4 complete sequence	4.12e-66	chr|AMe_AADG05001623|AMe_AADG05001623.1	Linkage group 4; [Apis mellifera] draft genome, Amel_4.0.	1e-38	--	--	--	--	M
SI.CL.23.cl.2313.SiJWG10AEA.scf	gnl|Amel|GB15418-PA	5e-61	chr|NC_007071|NC_007071.2 Chromosome LG2; [Apis mellifera] gi:110825766 chromosome 2 complete sequence	8.17e-37	chr|AMe_AADG05001085|AMe_AADG05001085.1	Linkage group 2; [Apis mellifera] draft genome, Amel_4.0.	9e-09	--	--	--	--	M
SI.CL.13.cl.1330.SiJWF11ADF.scf	gnl|Amel|GB18712-PA	6e-61	chr|NC_007071|NC_007071.2 Chromosome LG2; [Apis mellifera] gi:110825766 chromosome 2 complete sequence	2.02e-61	chr|AMe_AADG05000840|AMe_AADG05000840.1	Linkage group 2; [Apis mellifera] draft genome, Amel_4.0.	3e-12	--	--	--	--	M
SiJWG01BCB2.scf	gnl|Amel|GB13698-PA	7e-61	chr|NC_007072|NC_007072.2 Chromosome LG3; [Apis mellifera] gi:110825767 chromosome 3 complete sequence	1.6e-58	--	--	--	ens|ENSAPMP00000015865	pep:known group:AMEL2.0:Group3:9828989:9829820:-1 gene:ENSAPMG00000009091 transcript:ENSAPMT00000015865	3e-27	16	M
SI.CL.39.cl.3968.Contig1	gnl|Amel|GB19785-PA	9e-61	chr|NC_007084|NC_007084.2 Chromosome LG15; [Apis mellifera] gi:110825764 chromosome 15 complete sequence	9.31e-39	--	--	--	--	--	--	--	M
SI.CL.18.cl.1854.Contig1	gnl|Amel|GB17379-PA	2e-60	chr|NC_007070|NC_007070.2 Chromosome LG1; [Apis mellifera] gi:110825701 chromosome 1 complete sequence	1.26e-65	--	--	--	ens|ENSAPMP00000021136	pep:known group:AMEL2.0:Group1:17329904:17334238:-1 gene:ENSAPMG00000014126 transcript:ENSAPMT00000021130	4e-58	5	M
SI.CL.18.cl.1800.Contig2	gnl|Amel|GB10913-PA	2e-60	chr|NC_007070|NC_007070.2 Chromosome LG1; [Apis mellifera] gi:110825701 chromosome 1 complete sequence	2.6e-37	chr|AMe_AADG05000182|AMe_AADG05000182.1	Linkage group 1; [Apis mellifera] draft genome, Amel_4.0.	5e-25	ens|ENSAPMP00000013467	pep:known group:AMEL2.0:Group1:4327168:4328113:1 gene:ENSAPMG00000007700 transcript:ENSAPMT00000013467	6e-59	4	M
SiJWA06CAK2.scf	gnl|Amel|GB10306-PA	2e-60	chr|NC_007071|NC_007071.2 Chromosome LG2; [Apis mellifera] gi:110825766 chromosome 2 complete sequence	1.86e-11	--	--	--	ens|ENSAPMP00000035142	pep:novel group:AMEL2.0:GroupUn:16202096:16211975:1 gene:ENSAPMG00000014876 transcript:ENSAPMT00000035142	6e-11	6	M
SiJWE06ADR.scf	gnl|Amel|GB16561-PA	3e-60	chr|NC_007073|NC_007073.2 Chromosome LG4; [Apis mellifera] gi:110825768 chromosome 4 complete sequence	1.11e-52	--	--	--	ens|ENSAPMP00000016583	pep:novel group:AMEL2.0:Group4:5221476:5223034:-1 gene:ENSAPMG00000013159 transcript:ENSAPMT00000016583	9e-48	5	M
SI.CL.13.cl.1387.SiJWB06ABX.scf	gnl|Amel|GB16282-PA	3e-60	chr|NC_007077|NC_007077.2 Chromosome LG8; [Apis mellifera] gi:110825772 chromosome 8 complete sequence	4.15e-47	chr|AMe_AADG05003013|AMe_AADG05003013.1	Linkage group 8; [Apis mellifera] draft genome, Amel_4.0.	4e-14	--	--	--	--	M
SiJWH05ACH.scf	gnl|Amel|GB18751-PA	4e-60	chr|NC_007079|NC_007079.2 Chromosome LG10; [Apis mellifera] gi:110825711 chromosome 10 complete sequence	1.15e-61	--	--	--	ens|ENSAPMP00000000367	pep:novel group:AMEL2.0:Group10:4283696:4289229:1 gene:ENSAPMG00000000219 transcript:ENSAPMT00000000367	3e-53	6	M
SI.CL.6.cl.677.Contig2	gnl|Amel|GB18695-PA	6e-60	chr|NC_007080|NC_007080.2 Chromosome LG11; [Apis mellifera] gi:110825732 chromosome 11 complete sequence	1.43e-45	--	--	--	--	--	--	--	M
SiJWB09ADO.scf	gnl|Amel|GB10276-PA	6e-60	--	--	--	--	--	--	--	--	--	M
SI.CL.3.cl.342.Contig1	gnl|Amel|GB11769-PA	8e-60	chr|NC_007081|NC_007081.2 Chromosome LG12; [Apis mellifera] gi:110825756 chromosome 12 complete sequence	6.2e-10	--	--	--	--	--	--	--	M
SI.CL.43.cl.4309.Contig1	gnl|Amel|GB10135-PA	8e-60	--	--	chr|AMe_AADG05013620|AMe_AADG05013620.1	Linkage group Un; [Apis mellifera] draft genome, Amel_4.0.	9e-28	ens|ENSAPMP00000032068	pep:novel group:AMEL2.0:GroupUn:268781363:268782299:-1 gene:ENSAPMG00000013323 transcript:ENSAPMT00000032068	3e-40	20	M
SiJWF06AAG.scf	gnl|Amel|GB19614-PA	1e-59	chr|NC_007077|NC_007077.2 Chromosome LG8; [Apis mellifera] gi:110825772 chromosome 8 complete sequence	1.73e-64	chr|AMe_AADG05003009|AMe_AADG05003009.1	Linkage group 8; [Apis mellifera] draft genome, Amel_4.0.	3e-27	ens|ENSAPMP00000027721	pep:novel group:AMEL2.0:Group8:299055:304905:-1 gene:ENSAPMG00000009849 transcript:ENSAPMT00000027719	2e-30	6	M
SI.CL.5.cl.576.Contig1	gnl|Amel|GB11071-PA	2e-59	chr|NC_007078|NC_007078.2 Chromosome LG9; [Apis mellifera] gi:110825774 chromosome 9 complete sequence	1.39e-43	chr|AMe_AADG05003538|AMe_AADG05003538.1	Linkage group 9; [Apis mellifera] draft genome, Amel_4.0.	5e-35	--	--	--	--	M
SI.CL.3.cl.326.Contig1	gnl|Amel|GB15552-PA	2e-59	--	--	--	--	--	--	--	--	--	M
SiJWB10BDM2.scf	gnl|Amel|GB13372-PA	3e-59	chr|NC_007080|NC_007080.2 Chromosome LG11; [Apis mellifera] gi:110825732 chromosome 11 complete sequence	2.62e-55	--	--	--	--	--	--	--	M
SI.CL.25.cl.2527.Contig1	gnl|Amel|GB16450-PA	4e-59	chr|NC_007074|NC_007074.2 Chromosome LG5; [Apis mellifera] gi:110825769 chromosome 5 complete sequence	4.22e-16	--	--	--	ens|ENSAPMP00000034579	pep:novel group:AMEL2.0:GroupUn:94180337:94181759:-1 gene:ENSAPMG00000010503 transcript:ENSAPMT00000034579	6e-56	11	M
SiJWF06BAS.scf	gnl|Amel|GB15193-PA	5e-59	chr|NC_007077|NC_007077.2 Chromosome LG8; [Apis mellifera] gi:110825772 chromosome 8 complete sequence	2.27e-58	--	--	--	--	--	--	--	M
SI.CL.20.cl.2034.Contig1	gnl|Amel|GB10539-PA	8e-59	--	--	chr|AMe_AADG05008718|AMe_AADG05008718.1	Linkage group Un; [Apis mellifera] draft genome, Amel_4.0.	1e-07	--	--	--	--	M
SiJWE10CAK2.scf	gnl|Amel|GB15581-PA	1e-58	chr|NC_007084|NC_007084.2 Chromosome LG15; [Apis mellifera] gi:110825764 chromosome 15 complete sequence	2.13e-49	chr|AMe_AADG05005379|AMe_AADG05005379.1	Linkage group 15; [Apis mellifera] draft genome, Amel_4.0.	7e-78	--	--	--	--	M
SI.CL.9.cl.923.Contig1	gnl|Amel|GB18576-PA	2e-58	chr|NC_007080|NC_007080.2 Chromosome LG11; [Apis mellifera] gi:110825732 chromosome 11 complete sequence	8.92e-63	chr|AMe_AADG05004297|AMe_AADG05004297.1	Linkage group 11; [Apis mellifera] draft genome, Amel_4.0.	1e-37	--	--	--	--	M
SI.CL.20.cl.2087.Contig1	gnl|Amel|GB11374-PA	2e-58	chr|NC_007073|NC_007073.2 Chromosome LG4; [Apis mellifera] gi:110825768 chromosome 4 complete sequence	1.28e-57	--	--	--	--	--	--	--	M
SI.CL.6.cl.632.Contig2	gnl|Amel|GB17963-PA	2e-58	chr|NC_007070|NC_007070.2 Chromosome LG1; [Apis mellifera] gi:110825701 chromosome 1 complete sequence	1.33e-40	chr|AMe_AADG05000702|AMe_AADG05000702.1	Linkage group 1; [Apis mellifera] draft genome, Amel_4.0.	1e-16	ens|ENSAPMP00000032843	pep:novel group:AMEL2.0:Group1:23594635:23596223:1 gene:ENSAPMG00000015295 transcript:ENSAPMT00000032842	1e-42	5	M
SI.CL.11.cl.1113.Contig2	gnl|Amel|GB14539-PA	2e-58	chr|NC_007074|NC_007074.2 Chromosome LG5; [Apis mellifera] gi:110825769 chromosome 5 complete sequence	4.04e-25	--	--	--	--	--	--	--	M
SiJWH07BAL.scf	gnl|Amel|GB14023-PA	3e-58	chr|NC_007071|NC_007071.2 Chromosome LG2; [Apis mellifera] gi:110825766 chromosome 2 complete sequence	6.47e-63	--	--	--	ens|ENSAPMP00000009945	pep:novel group:AMEL2.0:Group2:4489422:4490052:1 gene:ENSAPMG00000005743 transcript:ENSAPMT00000009945	2e-35	5	M
SI.CL.25.cl.2507.Contig1	gnl|Amel|GB17021-PA	3e-58	chr|NC_007076|NC_007076.2 Chromosome LG7; [Apis mellifera] gi:110825771 chromosome 7 complete sequence	5.26e-62	--	--	--	--	--	--	--	M
SI.CL.38.cl.3826.Contig1	gnl|Amel|GB11376-PA	4e-58	--	--	chr|AMe_AADG05007383|AMe_AADG05007383.1	Linkage group Un; [Apis mellifera] draft genome, Amel_4.0.	2e-15	ens|ENSAPMP00000001587	pep:known group:AMEL2.0:GroupUn:37448668:37450431:1 gene:ENSAPMG00000000944 transcript:ENSAPMT00000001587	2e-21	5	M
SI.CL.29.cl.2957.Contig1	gnl|Amel|GB10163-PA	5e-58	chr|NC_007075|NC_007075.2 Chromosome LG6; [Apis mellifera] gi:110825770 chromosome 6 complete sequence	1.08e-15	--	--	--	--	--	--	--	M
SI.CL.40.cl.4047.Contig1	gnl|Amel|GB13916-PA	8e-58	chr|NC_007077|NC_007077.2 Chromosome LG8; [Apis mellifera] gi:110825772 chromosome 8 complete sequence	6.07e-47	--	--	--	--	--	--	--	M
SI.CL.7.cl.750.Contig4	gnl|Amel|GB14201-PA	1e-57	--	--	--	--	--	ens|ENSAPMP00000015746	pep:novel group:AMEL2.0:GroupUn:131201065:131203780:1 gene:ENSAPMG00000009020 transcript:ENSAPMT00000015746	1e-39	4	M
SI.CL.26.cl.2656.Contig1	gnl|Amel|GB17972-PA	2e-57	chr|NC_007080|NC_007080.2 Chromosome LG11; [Apis mellifera] gi:110825732 chromosome 11 complete sequence	2.25e-55	chr|AMe_AADG05004091|AMe_AADG05004091.1	Linkage group 11; [Apis mellifera] draft genome, Amel_4.0.	1e-32	--	--	--	--	M
SI.CL.11.cl.1184.Contig1	gnl|Amel|GB10611-PA	2e-57	chr|NC_007084|NC_007084.2 Chromosome LG15; [Apis mellifera] gi:110825764 chromosome 15 complete sequence	3.79e-48	chr|AMe_AADG05005204|AMe_AADG05005204.1	Linkage group 15; [Apis mellifera] draft genome, Amel_4.0.	6e-10	--	--	--	--	M
SI.CL.25.cl.2589.Contig1	gnl|Amel|GB16879-PA	3e-57	--	--	chr|AMe_AADG05007681|AMe_AADG05007681.1	Linkage group Un; [Apis mellifera] draft genome, Amel_4.0.	2e-06	ens|ENSAPMP00000028246	pep:novel group:AMEL2.0:GroupUn:53975868:53976626:1 gene:ENSAPMG00000016448 transcript:ENSAPMT00000028245	3e-42	7	M
SI.CL.0.cl.015.Contig2	gnl|Amel|GB20097-PA	4e-57	chr|NC_007084|NC_007084.2 Chromosome LG15; [Apis mellifera] gi:110825764 chromosome 15 complete sequence	4.5e-42	--	--	--	--	--	--	--	M
SI.CL.18.cl.1800.Contig1	gnl|Amel|GB10913-PA	4e-57	chr|NC_007070|NC_007070.2 Chromosome LG1; [Apis mellifera] gi:110825701 chromosome 1 complete sequence	2.41e-37	chr|AMe_AADG05000182|AMe_AADG05000182.1	Linkage group 1; [Apis mellifera] draft genome, Amel_4.0.	4e-25	ens|ENSAPMP00000013467	pep:known group:AMEL2.0:Group1:4327168:4328113:1 gene:ENSAPMG00000007700 transcript:ENSAPMT00000013467	2e-55	4	M
SiJWB04AEA.scf	gnl|Amel|GB16522-PA	5e-57	--	--	chr|AMe_AADG05006874|AMe_AADG05006874.1	Linkage group Un; [Apis mellifera] draft genome, Amel_4.0.	7e-22	ens|ENSAPMP00000034193	pep:novel group:AMEL2.0:GroupUn:38971691:38972321:-1 gene:ENSAPMG00000014443 transcript:ENSAPMT00000034192	1e-47	3	M
SI.CL.6.cl.678.SiJWF06ACE.scf	gnl|Amel|GB18959-PA	7e-57	chr|NC_007073|NC_007073.2 Chromosome LG4; [Apis mellifera] gi:110825768 chromosome 4 complete sequence	1.27e-63	chr|AMe_AADG05001758|AMe_AADG05001758.1	Linkage group 4; [Apis mellifera] draft genome, Amel_4.0.	6e-41	--	--	--	--	M
SiJWH10BDK2.scf	gnl|Amel|GB17581-PA	7e-57	chr|NC_007083|NC_007083.2 Chromosome LG14; [Apis mellifera] gi:110825763 chromosome 14 complete sequence	1.21e-56	chr|AMe_AADG05005013|AMe_AADG05005013.1	Linkage group 14; [Apis mellifera] draft genome, Amel_4.0.	2e-16	--	--	--	--	M
SI.CL.11.cl.1185.Contig1	gnl|Amel|GB14315-PA	8e-57	chr|NC_007073|NC_007073.2 Chromosome LG4; [Apis mellifera] gi:110825768 chromosome 4 complete sequence	1.21e-27	--	--	--	--	--	--	--	M
SiJWD11AAG.scf	gnl|Amel|GB18630-PA	9e-57	chr|NC_007070|NC_007070.2 Chromosome LG1; [Apis mellifera] gi:110825701 chromosome 1 complete sequence	5.15e-57	chr|AMe_AADG05000361|AMe_AADG05000361.1	Linkage group 1; [Apis mellifera] draft genome, Amel_4.0.	4e-14	ens|ENSAPMP00000000760	pep:novel group:AMEL2.0:Group1:10550071:10554014:-1 gene:ENSAPMG00000000480 transcript:ENSAPMT00000000760	5e-50	2	M
SI.CL.15.cl.1546.Contig1	gnl|Amel|GB12317-PA	2e-56	chr|NC_007078|NC_007078.2 Chromosome LG9; [Apis mellifera] gi:110825774 chromosome 9 complete sequence	8.01e-71	chr|AMe_AADG05003441|AMe_AADG05003441.1	Linkage group 9; [Apis mellifera] draft genome, Amel_4.0.	1e-70	--	--	--	--	M
SiJWG08BAO.scf	gnl|Amel|GB17816-PA	2e-56	chr|NC_007078|NC_007078.2 Chromosome LG9; [Apis mellifera] gi:110825774 chromosome 9 complete sequence	1.08e-64	chr|AMe_AADG05003529|AMe_AADG05003529.1	Linkage group 9; [Apis mellifera] draft genome, Amel_4.0.	1e-17	--	--	--	--	M
SiJWA01ACN.scf	gnl|Amel|GB15475-PA	2e-56	chr|NC_007070|NC_007070.2 Chromosome LG1; [Apis mellifera] gi:110825701 chromosome 1 complete sequence	5.43e-49	--	--	--	--	--	--	--	M
SI.CL.31.cl.3180.SiJWC03CAJ2.scf	gnl|Amel|GB18879-PA	2e-56	--	--	chr|AMe_AADG05008403|AMe_AADG05008403.1	Linkage group Un; [Apis mellifera] draft genome, Amel_4.0.	7e-07	--	--	--	--	M
SiJWF10ADL.scf	gnl|Amel|GB15230-PA	3e-56	chr|NC_007076|NC_007076.2 Chromosome LG7; [Apis mellifera] gi:110825771 chromosome 7 complete sequence	4.76e-40	--	--	--	--	--	--	--	M
SiJWE10ACB.scf	gnl|Amel|GB14552-PA	3e-56	--	--	chr|AMe_AADG05009309|AMe_AADG05009309.1	Linkage group Un; [Apis mellifera] draft genome, Amel_4.0.	9e-37	--	--	--	--	M
SI.CL.12.cl.1257.Contig1	gnl|Amel|GB17690-PA	4e-56	chr|NC_007080|NC_007080.2 Chromosome LG11; [Apis mellifera] gi:110825732 chromosome 11 complete sequence	2.95e-66	--	--	--	--	--	--	--	M
SI.CL.20.cl.2015.Contig1	gnl|Amel|GB15602-PA	5e-56	chr|NC_007084|NC_007084.2 Chromosome LG15; [Apis mellifera] gi:110825764 chromosome 15 complete sequence	4.44e-12	--	--	--	ens|ENSAPMP00000017394	pep:novel group:AMEL2.0:Group15:181743:183185:1 gene:ENSAPMG00000012332 transcript:ENSAPMT00000017392	3e-48	3	M
SiJWH10BAG.scf	gnl|Amel|GB18326-PA	6e-56	chr|NC_007077|NC_007077.2 Chromosome LG8; [Apis mellifera] gi:110825772 chromosome 8 complete sequence	1.95e-56	chr|AMe_AADG05007890|AMe_AADG05007890.1	Linkage group 8; [Apis mellifera] draft genome, Amel_4.0.	2e-10	--	--	--	--	M
SI.CL.7.cl.710.Contig1	gnl|Amel|GB19875-PA	6e-56	chr|NC_007082|NC_007082.2 Chromosome LG13; [Apis mellifera] gi:110825762 chromosome 13 complete sequence	3.77e-37	--	--	--	--	--	--	--	M
SI.CL.21.cl.2138.Contig1	gnl|Amel|GB18874-PA	7e-56	chr|NC_007084|NC_007084.2 Chromosome LG15; [Apis mellifera] gi:110825764 chromosome 15 complete sequence	4.68e-14	chr|AMe_AADG05005497|AMe_AADG05005497.1	Linkage group 15; [Apis mellifera] draft genome, Amel_4.0.	9e-09	ens|ENSAPMP00000014732	pep:known group:AMEL2.0:Group15:7314323:7315291:-1 gene:ENSAPMG00000008402 transcript:ENSAPMT00000014732	1e-30	5	M
SI.CL.20.cl.2020.Contig1	gnl|Amel|GB17741-PA	1e-55	chr|NC_007072|NC_007072.2 Chromosome LG3; [Apis mellifera] gi:110825767 chromosome 3 complete sequence	8.95e-60	--	--	--	--	--	--	--	M
SI.CL.29.cl.2946.Contig1	gnl|Amel|GB16924-PA	1e-55	--	--	chr|AMe_AADG05006847|AMe_AADG05006847.1	Linkage group Un; [Apis mellifera] draft genome, Amel_4.0.	2e-40	ens|ENSAPMP00000032795	pep:known group:AMEL2.0:GroupUn:22241991:22244587:-1 gene:ENSAPMG00000012898 transcript:ENSAPMT00000032794	3e-21	20	M
SI.CL.34.cl.3446.Contig1	gnl|Amel|GB11979-PA	2e-55	chr|NC_007072|NC_007072.2 Chromosome LG3; [Apis mellifera] gi:110825767 chromosome 3 complete sequence	7.39e-33	chr|AMe_AADG05006192|AMe_AADG05006192.1	Linkage group 3; [Apis mellifera] draft genome, Amel_4.0.	4e-23	ens|ENSAPMP00000013527	pep:known group:AMEL2.0:GroupUn:16423039:16425905:1 gene:ENSAPMG00000007726 transcript:ENSAPMT00000013527	5e-52	3	M
SiJWB04BBF.scf	gnl|Amel|GB16024-PA	2e-55	--	--	chr|AMe_AADG05009185|AMe_AADG05009185.1	Linkage group Un; [Apis mellifera] draft genome, Amel_4.0.	4e-17	--	--	--	--	M
SiJWA09BCS2.scf	gnl|Amel|GB12389-PA	4e-55	chr|NC_007080|NC_007080.2 Chromosome LG11; [Apis mellifera] gi:110825732 chromosome 11 complete sequence	5.71e-57	--	--	--	ens|ENSAPMP00000016438	pep:novel group:AMEL2.0:Group11:1366239:1366782:1 gene:ENSAPMG00000009400 transcript:ENSAPMT00000016438	2e-28	2	M
SI.CL.18.cl.1800.SiJWH06CAC2.scf	gnl|Amel|GB10913-PA	4e-55	chr|NC_007070|NC_007070.2 Chromosome LG1; [Apis mellifera] gi:110825701 chromosome 1 complete sequence	5.68e-37	chr|AMe_AADG05000182|AMe_AADG05000182.1	Linkage group 1; [Apis mellifera] draft genome, Amel_4.0.	9e-25	ens|ENSAPMP00000013467	pep:known group:AMEL2.0:Group1:4327168:4328113:1 gene:ENSAPMG00000007700 transcript:ENSAPMT00000013467	1e-52	4	M
SiJWA08CAF2.scf	gnl|Amel|GB18553-PA	5e-55	chr|NC_007070|NC_007070.2 Chromosome LG1; [Apis mellifera] gi:110825701 chromosome 1 complete sequence	5.73e-25	--	--	--	ens|ENSAPMP00000013764	pep:known group:AMEL2.0:Group1:11493283:11494527:1 gene:ENSAPMG00000007865 transcript:ENSAPMT00000013764	3e-12	7	M
SiJWH03BBC2.scf	gnl|Amel|GB10541-PA	9e-55	chr|NC_007077|NC_007077.2 Chromosome LG8; [Apis mellifera] gi:110825772 chromosome 8 complete sequence	1.68e-57	chr|AMe_AADG05003206|AMe_AADG05003206.1	Linkage group 8; [Apis mellifera] draft genome, Amel_4.0.	3e-09	--	--	--	--	M
SiJWC01CAX.scf	gnl|Amel|GB10937-PA	1e-54	chr|NC_007072|NC_007072.2 Chromosome LG3; [Apis mellifera] gi:110825767 chromosome 3 complete sequence	7.65e-56	--	--	--	ens|ENSAPMP00000010001	pep:novel group:AMEL2.0:Group5:11431098:11434704:-1 gene:ENSAPMG00000005776 transcript:ENSAPMT00000010001	1e-28	15	M
SI.CL.40.cl.4089.Contig1	gnl|Amel|GB17387-PA	2e-54	chr|NC_007085|NC_007085.2 Chromosome LG16; [Apis mellifera] gi:110825765 chromosome 16 complete sequence	3.22e-30	--	--	--	--	--	--	--	M
SI.CL.37.cl.3776.Contig1	gnl|Amel|GB13286-PA	2e-54	--	--	--	--	--	--	--	--	--	M
SI.CL.21.cl.2158.SiJWH12ADV.scf	gnl|Amel|GB12277-PA	3e-54	--	--	chr|AMe_AADG05006088|AMe_AADG05006088.1	Linkage group Un; [Apis mellifera] draft genome, Amel_4.0.	3e-36	--	--	--	--	M
SiJWH01ACM.scf	gnl|Amel|GB17877-PA	4e-54	chr|NC_007082|NC_007082.2 Chromosome LG13; [Apis mellifera] gi:110825762 chromosome 13 complete sequence	5.11e-18	--	--	--	ens|ENSAPMP00000010168	pep:known group:AMEL2.0:Group13:4647225:4660242:1 gene:ENSAPMG00000005889 transcript:ENSAPMT00000010168	7e-52	7	M
SI.CL.0.cl.069.Contig1	gnl|Amel|GB17767-PA	5e-54	chr|NC_007074|NC_007074.2 Chromosome LG5; [Apis mellifera] gi:110825769 chromosome 5 complete sequence	5.03e-40	chr|AMe_AADG05001943|AMe_AADG05001943.1	Linkage group 5; [Apis mellifera] draft genome, Amel_4.0.	2e-16	--	--	--	--	M
SI.CL.19.cl.1907.Contig1	gnl|Amel|GB13392-PA	6e-54	chr|NC_007077|NC_007077.2 Chromosome LG8; [Apis mellifera] gi:110825772 chromosome 8 complete sequence	4.4e-54	--	--	--	--	--	--	--	M
SI.CL.15.cl.1568.Contig1	gnl|Amel|GB18843-PA	7e-54	chr|NC_007074|NC_007074.2 Chromosome LG5; [Apis mellifera] gi:110825769 chromosome 5 complete sequence	1.77e-66	--	--	--	--	--	--	--	M
SiJWC04BAT.scf	gnl|Amel|GB15447-PA	7e-54	chr|NC_007070|NC_007070.2 Chromosome LG1; [Apis mellifera] gi:110825701 chromosome 1 complete sequence	7.07e-44	chr|AMe_AADG05011302|AMe_AADG05011302.1	Linkage group Un; [Apis mellifera] draft genome, Amel_4.0.	1e-08	ens|ENSAPMP00000031012	pep:novel group:AMEL2.0:GroupUn:30402200:30403180:-1 gene:ENSAPMG00000012356 transcript:ENSAPMT00000031011	3e-43	11	M
SiJWD08ABG.scf	gnl|Amel|GB19620-PA	3e-53	chr|NC_007070|NC_007070.2 Chromosome LG1; [Apis mellifera] gi:110825701 chromosome 1 complete sequence	2.54e-59	chr|AMe_AADG05000347|AMe_AADG05000347.1	Linkage group 1; [Apis mellifera] draft genome, Amel_4.0.	4e-14	ens|ENSAPMP00000025375	pep:novel group:AMEL2.0:Group1:9956087:9956703:1 gene:ENSAPMG00000001145 transcript:ENSAPMT00000025375	3e-32	3	M
SI.CL.41.cl.4190.Contig1	gnl|Amel|GB17727-PA	4e-53	chr|NC_007070|NC_007070.2 Chromosome LG1; [Apis mellifera] gi:110825701 chromosome 1 complete sequence	2.05e-53	chr|AMe_AADG05000003|AMe_AADG05000003.1	Linkage group 1; [Apis mellifera] draft genome, Amel_4.0.	2e-41	ens|ENSAPMP00000003962	pep:known group:AMEL2.0:Group1:2797:3570:-1 gene:ENSAPMG00000002292 transcript:ENSAPMT00000003962	7e-27	7	M
SiJWG04BBP.scf	gnl|Amel|GB18640-PA	4e-53	chr|NC_007077|NC_007077.2 Chromosome LG8; [Apis mellifera] gi:110825772 chromosome 8 complete sequence	5.65e-35	--	--	--	--	--	--	--	M
SiJWA04ABM.scf	gnl|Amel|GB17195-PA	4e-53	--	--	chr|AMe_AADG05009789|AMe_AADG05009789.1	Linkage group Un; [Apis mellifera] draft genome, Amel_4.0.	4e-20	ens|ENSAPMP00000007812	pep:novel group:AMEL2.0:GroupUn:63673690:63675010:1 gene:ENSAPMG00000004518 transcript:ENSAPMT00000007812	3e-52	2	M
SiJWD05BBP.scf	gnl|Amel|GB14895-PA	5e-53	chr|NC_007070|NC_007070.2 Chromosome LG1; [Apis mellifera] gi:110825701 chromosome 1 complete sequence	1.52e-60	--	--	--	ens|ENSAPMP00000024715	pep:novel group:AMEL2.0:Group1:22973340:22975538:-1 gene:ENSAPMG00000014271 transcript:ENSAPMT00000024711	2e-51	8	M
SiJWA12BBG.scf	gnl|Amel|GB10819-PA	5e-53	chr|NC_007074|NC_007074.2 Chromosome LG5; [Apis mellifera] gi:110825769 chromosome 5 complete sequence	2.82e-33	chr|AMe_AADG05006400|AMe_AADG05006400.1	Linkage group Un; [Apis mellifera] draft genome, Amel_4.0.	1e-23	--	--	--	--	M
SiJWH11AAA2.scf	gnl|Amel|GB18522-PA	7e-53	--	--	--	--	--	ens|ENSAPMP00000000835	pep:novel group:AMEL2.0:GroupUn:90729734:90730411:-1 gene:ENSAPMG00000000529 transcript:ENSAPMT00000000835	3e-38	6	M
SiJWA07ACQ.scf	gnl|Amel|GB11000-PA	8e-53	chr|NC_007073|NC_007073.2 Chromosome LG4; [Apis mellifera] gi:110825768 chromosome 4 complete sequence	5.36e-52	--	--	--	--	--	--	--	M
SiJWF03BDX.scf	gnl|Amel|GB18497-PA	2e-52	chr|NC_007080|NC_007080.2 Chromosome LG11; [Apis mellifera] gi:110825732 chromosome 11 complete sequence	9.29e-52	chr|AMe_AADG05004069|AMe_AADG05004069.1	Linkage group 11; [Apis mellifera] draft genome, Amel_4.0.	3e-09	ens|ENSAPMP00000010611	pep:known group:AMEL2.0:Group11:154630:155680:1 gene:ENSAPMG00000006153 transcript:ENSAPMT00000010611	6e-42	6	M
SI.CL.17.cl.1743.Contig1	gnl|Amel|GB10941-PA	3e-52	chr|NC_007070|NC_007070.2 Chromosome LG1; [Apis mellifera] gi:110825701 chromosome 1 complete sequence	1.09e-49	--	--	--	ens|ENSAPMP00000033488	pep:known group:AMEL2.0:GroupUn:41982903:41983654:1 gene:ENSAPMG00000010861 transcript:ENSAPMT00000033489	5e-42	6	M
SI.CL.2.cl.208.Contig1	gnl|Amel|GB15937-PA	7e-52	chr|NC_007071|NC_007071.2 Chromosome LG2; [Apis mellifera] gi:110825766 chromosome 2 complete sequence	1.55e-36	--	--	--	ens|ENSAPMP00000017219	pep:novel group:AMEL2.0:Group2:10229393:10229971:1 gene:ENSAPMG00000012169 transcript:ENSAPMT00000017219	9e-23	5	M
SiJWF07CAA.scf	gnl|Amel|GB13126-PA	2e-51	chr|NC_007081|NC_007081.2 Chromosome LG12; [Apis mellifera] gi:110825756 chromosome 12 complete sequence	1.7e-65	chr|AMe_AADG05004640|AMe_AADG05004640.1	Linkage group 12; [Apis mellifera] draft genome, Amel_4.0.	1e-35	--	--	--	--	M
SI.CL.26.cl.2680.Contig1	gnl|Amel|GB15243-PA	2e-51	chr|NC_007080|NC_007080.2 Chromosome LG11; [Apis mellifera] gi:110825732 chromosome 11 complete sequence	1.65e-55	chr|AMe_AADG05004085|AMe_AADG05004085.1	Linkage group 11; [Apis mellifera] draft genome, Amel_4.0.	2e-15	--	--	--	--	M
SI.CL.3.cl.334.Contig1	gnl|Amel|GB20012-PA	2e-51	--	--	--	--	--	ens|ENSAPMP00000005058	pep:known group:AMEL2.0:GroupUn:26998608:26999732:-1 gene:ENSAPMG00000002894 transcript:ENSAPMT00000005058	4e-31	13	M
SiJWA09AAY.scf	gnl|Amel|GB14620-PA	3e-51	chr|NC_007070|NC_007070.2 Chromosome LG1; [Apis mellifera] gi:110825701 chromosome 1 complete sequence	1.25e-69	chr|AMe_AADG05000453|AMe_AADG05000453.1	Linkage group 1; [Apis mellifera] draft genome, Amel_4.0.	3e-49	--	--	--	--	M
SiJWE01BDF.scf	gnl|Amel|GB12874-PA	3e-51	chr|NC_007083|NC_007083.2 Chromosome LG14; [Apis mellifera] gi:110825763 chromosome 14 complete sequence	7.67e-44	--	--	--	--	--	--	--	M
SI.CL.23.cl.2389.Contig1	gnl|Amel|GB17637-PA	4e-51	chr|NC_007073|NC_007073.2 Chromosome LG4; [Apis mellifera] gi:110825768 chromosome 4 complete sequence	2.29e-52	chr|AMe_AADG05001802|AMe_AADG05001802.1	Linkage group 4; [Apis mellifera] draft genome, Amel_4.0.	1e-08	ens|ENSAPMP00000002292	pep:known group:AMEL2.0:Group4:9434645:9435276:-1 gene:ENSAPMG00000001340 transcript:ENSAPMT00000002292	2e-44	4	M
SI.CL.22.cl.2299.Contig1	gnl|Amel|GB16322-PA	5e-51	chr|NC_007073|NC_007073.2 Chromosome LG4; [Apis mellifera] gi:110825768 chromosome 4 complete sequence	6.83e-57	chr|AMe_AADG05001699|AMe_AADG05001699.1	Linkage group 4; [Apis mellifera] draft genome, Amel_4.0.	4e-23	--	--	--	--	M
SiJWB09BBD2.scf	gnl|Amel|GB11593-PA	6e-51	--	--	chr|AMe_AADG05006223|AMe_AADG05006223.1	Linkage group Un; [Apis mellifera] draft genome, Amel_4.0.	1e-11	--	--	--	--	M
SiJWE07ABR.scf	gnl|Amel|GB14771-PA	7e-51	--	--	--	--	--	--	--	--	--	M
SI.CL.1.cl.109.Contig1	gnl|Amel|GB11699-PA	9e-51	chr|NC_007076|NC_007076.2 Chromosome LG7; [Apis mellifera] gi:110825771 chromosome 7 complete sequence	1.99e-98	chr|AMe_AADG05002968|AMe_AADG05002968.1	Linkage group 7; [Apis mellifera] draft genome, Amel_4.0.	3e-21	--	--	--	--	M
SI.CL.26.cl.2680.SiJWF10BAM.scf	gnl|Amel|GB15243-PA	1e-50	chr|NC_007080|NC_007080.2 Chromosome LG11; [Apis mellifera] gi:110825732 chromosome 11 complete sequence	3.81e-54	chr|AMe_AADG05004085|AMe_AADG05004085.1	Linkage group 11; [Apis mellifera] draft genome, Amel_4.0.	3e-15	--	--	--	--	M
SI.CL.24.cl.2433.Contig2	gnl|Amel|GB19452-PA	1e-50	chr|NC_007078|NC_007078.2 Chromosome LG9; [Apis mellifera] gi:110825774 chromosome 9 complete sequence	7.61e-16	--	--	--	ens|ENSAPMP00000019811	pep:novel group:AMEL2.0:Group4:4428469:4430201:-1 gene:ENSAPMG00000013311 transcript:ENSAPMT00000019806	8e-38	2	M
SiJWG09BAZ2.scf	gnl|Amel|GB19903-PA	1e-50	chr|NC_007070|NC_007070.2 Chromosome LG1; [Apis mellifera] gi:110825701 chromosome 1 complete sequence	2.12e-11	chr|AMe_AADG05000568|AMe_AADG05000568.1	Linkage group 1; [Apis mellifera] draft genome, Amel_4.0.	1e-08	ens|ENSAPMP00000005466	pep:known group:AMEL2.0:Group1:18386916:18387745:1 gene:ENSAPMG00000003126 transcript:ENSAPMT00000005466	5e-33	6	M
SI.CL.14.cl.1460.Contig1	gnl|Amel|GB11372-PA	1e-50	--	--	--	--	--	ens|ENSAPMP00000007387	pep:known group:AMEL2.0:GroupUn:80996032:81013908:1 gene:ENSAPMG00000004266 transcript:ENSAPMT00000007387	8e-28	6	M
SI.CL.43.cl.4314.SiJWG04BCP2.scf	gnl|Amel|GB11597-PA	1e-50	--	--	--	--	--	ens|ENSAPMP00000021348	pep:novel group:AMEL2.0:GroupUn:77589276:77590550:-1 gene:ENSAPMG00000010316 transcript:ENSAPMT00000021341	1e-15	7	M
SiJWG01ADJ.scf	gnl|Amel|GB17346-PA	2e-50	chr|NC_007072|NC_007072.2 Chromosome LG3; [Apis mellifera] gi:110825767 chromosome 3 complete sequence	3.31e-50	--	--	--	ens|ENSAPMP00000003783	pep:known group:AMEL2.0:Group3:999106:999741:-1 gene:ENSAPMG00000002191 transcript:ENSAPMT00000003783	1e-17	14	M
SiJWB11BDS2.scf	gnl|Amel|GB16909-PA	2e-50	chr|NC_007076|NC_007076.2 Chromosome LG7; [Apis mellifera] gi:110825771 chromosome 7 complete sequence	2.69e-28	--	--	--	ens|ENSAPMP00000007643	pep:novel group:AMEL2.0:Group7:5695890:5723032:1 gene:ENSAPMG00000004422 transcript:ENSAPMT00000007643	1e-24	6	M
SI.CL.27.cl.2796.Contig1	gnl|Amel|GB15933-PA	6e-50	chr|NC_007084|NC_007084.2 Chromosome LG15; [Apis mellifera] gi:110825764 chromosome 15 complete sequence	7.62e-54	--	--	--	ens|ENSAPMP00000022217	pep:novel group:AMEL2.0:Group15:5923977:5924503:-1 gene:ENSAPMG00000010128 transcript:ENSAPMT00000022211	7e-13	20	M
SI.CL.0.cl.013.Contig1	gnl|Amel|GB11652-PA	7e-50	chr|NC_007081|NC_007081.2 Chromosome LG12; [Apis mellifera] gi:110825756 chromosome 12 complete sequence	1.19e-31	--	--	--	--	--	--	--	M
SiJWB03BAK.scf	gnl|Amel|GB19484-PA	8e-50	--	--	--	--	--	--	--	--	--	M
SiJWC01BBW.scf	gnl|Amel|GB17164-PA	9e-50	chr|NC_007083|NC_007083.2 Chromosome LG14; [Apis mellifera] gi:110825763 chromosome 14 complete sequence	1.33e-43	--	--	--	ens|ENSAPMP00000017953	pep:known group:AMEL2.0:GroupUn:16899460:16900159:1 gene:ENSAPMG00000010944 transcript:ENSAPMT00000017952	3e-12	4	M
SiJWD10BAM.scf	gnl|Amel|GB17446-PA	1e-49	chr|NC_007070|NC_007070.2 Chromosome LG1; [Apis mellifera] gi:110825701 chromosome 1 complete sequence	1.63e-59	--	--	--	ens|ENSAPMP00000012902	pep:novel group:AMEL2.0:Group1:5957413:5967134:1 gene:ENSAPMG00000007387 transcript:ENSAPMT00000012902	4e-35	13	M
SI.CL.7.cl.726.Contig1	gnl|Amel|GB12024-PA	1e-49	chr|NC_007070|NC_007070.2 Chromosome LG1; [Apis mellifera] gi:110825701 chromosome 1 complete sequence	2.68e-38	--	--	--	ens|ENSAPMP00000004985	pep:novel group:AMEL2.0:GroupUn:13922333:13926041:-1 gene:ENSAPMG00000002847 transcript:ENSAPMT00000004985	8e-26	8	M
SI.CL.13.cl.1345.Contig1	gnl|Amel|GB14252-PA	1e-49	chr|NC_007075|NC_007075.2 Chromosome LG6; [Apis mellifera] gi:110825770 chromosome 6 complete sequence	2.91e-25	--	--	--	--	--	--	--	M
SI.CL.22.cl.2230.Contig1	gnl|Amel|GB13052-PA	2e-49	chr|NC_007079|NC_007079.2 Chromosome LG10; [Apis mellifera] gi:110825711 chromosome 10 complete sequence	4.25e-50	chr|AMe_AADG05003805|AMe_AADG05003805.1	Linkage group 10; [Apis mellifera] draft genome, Amel_4.0.	2e-22	--	--	--	--	M
SiJWB10BDF.scf	gnl|Amel|GB16961-PA	2e-49	chr|NC_007080|NC_007080.2 Chromosome LG11; [Apis mellifera] gi:110825732 chromosome 11 complete sequence	8.18e-41	--	--	--	ens|ENSAPMP00000027842	pep:known group:AMEL2.0:Group11:11933399:11933971:1 gene:ENSAPMG00000012024 transcript:ENSAPMT00000027839	4e-26	12	M
SI.CL.11.cl.1113.Contig1	gnl|Amel|GB14539-PA	2e-49	chr|NC_007074|NC_007074.2 Chromosome LG5; [Apis mellifera] gi:110825769 chromosome 5 complete sequence	9.14e-22	--	--	--	--	--	--	--	M
SiJWB06BAQ.scf	gnl|Amel|GB15471-PA	3e-49	--	--	chr|AMe_AADG05006452|AMe_AADG05006452.1	Linkage group Un; [Apis mellifera] draft genome, Amel_4.0.	2e-09	--	--	--	--	M
SiJWD08BCB2.scf	gnl|Amel|GB18062-PA	5e-49	chr|NC_007083|NC_007083.2 Chromosome LG14; [Apis mellifera] gi:110825763 chromosome 14 complete sequence	5.94e-34	chr|AMe_AADG05005052|AMe_AADG05005052.1	Linkage group 14; [Apis mellifera] draft genome, Amel_4.0.	2e-06	--	--	--	--	M
SiJWF10ACV.scf	gnl|Amel|GB13569-PA	8e-49	chr|NC_007077|NC_007077.2 Chromosome LG8; [Apis mellifera] gi:110825772 chromosome 8 complete sequence	7.19e-43	--	--	--	ens|ENSAPMP00000024867	pep:novel group:AMEL2.0:GroupUn:15458793:15459645:1 gene:ENSAPMG00000013490 transcript:ENSAPMT00000024865	7e-24	15	M
SiJWB10BBT.scf	gnl|Amel|GB11830-PA	9e-49	chr|NC_007078|NC_007078.2 Chromosome LG9; [Apis mellifera] gi:110825774 chromosome 9 complete sequence	1.35e-39	chr|AMe_AADG05003588|AMe_AADG05003588.1	Linkage group 9; [Apis mellifera] draft genome, Amel_4.0.	3e-15	--	--	--	--	M
SiJWD06ACQ.scf	gnl|Amel|GB20111-PA	9e-49	chr|NC_007073|NC_007073.2 Chromosome LG4; [Apis mellifera] gi:110825768 chromosome 4 complete sequence	3.52e-38	chr|AMe_AADG05001802|AMe_AADG05001802.1	Linkage group 4; [Apis mellifera] draft genome, Amel_4.0.	2e-06	--	--	--	--	M
SI.CL.9.cl.943.Contig1	gnl|Amel|GB13253-PA	9e-49	chr|NC_007080|NC_007080.2 Chromosome LG11; [Apis mellifera] gi:110825732 chromosome 11 complete sequence	2.71e-13	--	--	--	--	--	--	--	M
SiJWD09ABM.scf	gnl|Amel|GB18755-PA	1e-48	chr|NC_007081|NC_007081.2 Chromosome LG12; [Apis mellifera] gi:110825756 chromosome 12 complete sequence	3.38e-53	chr|AMe_AADG05004644|AMe_AADG05004644.1	Linkage group 12; [Apis mellifera] draft genome, Amel_4.0.	5e-29	--	--	--	--	M
SI.CL.36.cl.3645.Contig1	gnl|Amel|GB17836-PA	1e-48	chr|NC_007070|NC_007070.2 Chromosome LG1; [Apis mellifera] gi:110825701 chromosome 1 complete sequence	2.84e-36	chr|AMe_AADG05007028|AMe_AADG05007028.1	Linkage group 1; [Apis mellifera] draft genome, Amel_4.0.	1e-22	ens|ENSAPMP00000009093	pep:known group:AMEL2.0:GroupUn:23598308:23598862:-1 gene:ENSAPMG00000005258 transcript:ENSAPMT00000009093	8e-31	6	M
SI.CL.12.cl.1215.Contig1	gnl|Amel|GB12089-PA	2e-48	chr|NC_007080|NC_007080.2 Chromosome LG11; [Apis mellifera] gi:110825732 chromosome 11 complete sequence	2.16e-54	chr|AMe_AADG05006087|AMe_AADG05006087.1	Linkage group 11; [Apis mellifera] draft genome, Amel_4.0.	2e-23	--	--	--	--	M
SI.CL.25.cl.2555.Contig1	gnl|Amel|GB10068-PA	2e-48	--	--	chr|AMe_AADG05013035|AMe_AADG05013035.1	Linkage group Un; [Apis mellifera] draft genome, Amel_4.0.	4e-08	--	--	--	--	M
SI.CL.16.cl.1645.Contig1	gnl|Amel|GB17933-PA	3e-48	chr|NC_007074|NC_007074.2 Chromosome LG5; [Apis mellifera] gi:110825769 chromosome 5 complete sequence	1.14e-50	--	--	--	--	--	--	--	M
SiJWA11BBI.scf	gnl|Amel|GB18738-PA	3e-48	chr|NC_007079|NC_007079.2 Chromosome LG10; [Apis mellifera] gi:110825711 chromosome 10 complete sequence	9.6e-25	--	--	--	--	--	--	--	M
SI.CL.13.cl.1334.Contig2	gnl|Amel|GB16964-PA	3e-48	chr|NC_007070|NC_007070.2 Chromosome LG1; [Apis mellifera] gi:110825701 chromosome 1 complete sequence	1.38e-12	--	--	--	--	--	--	--	M
SI.CL.24.cl.2452.Contig1	gnl|Amel|GB18434-PA	8e-48	chr|NC_007071|NC_007071.2 Chromosome LG2; [Apis mellifera] gi:110825766 chromosome 2 complete sequence	3.73e-09	chr|AMe_AADG05006846|AMe_AADG05006846.1	Linkage group Un; [Apis mellifera] draft genome, Amel_4.0.	6e-16	--	--	--	--	M
SiJWE03AAU.scf	gnl|Amel|GB15735-PA	9e-48	chr|NC_007074|NC_007074.2 Chromosome LG5; [Apis mellifera] gi:110825769 chromosome 5 complete sequence	1.25e-41	--	--	--	--	--	--	--	M
SI.CL.33.cl.3328.Contig1	gnl|Amel|GB18668-PA	1e-47	chr|NC_007073|NC_007073.2 Chromosome LG4; [Apis mellifera] gi:110825768 chromosome 4 complete sequence	9.81e-53	--	--	--	--	--	--	--	M
SiJWG07ABO.scf	gnl|Amel|GB20083-PA	1e-47	chr|NC_007080|NC_007080.2 Chromosome LG11; [Apis mellifera] gi:110825732 chromosome 11 complete sequence	8.21e-51	chr|AMe_AADG05004147|AMe_AADG05004147.1	Linkage group 11; [Apis mellifera] draft genome, Amel_4.0.	4e-17	--	--	--	--	M
SI.CL.17.cl.1725.Contig1	gnl|Amel|GB15711-PA	1e-47	chr|NC_007077|NC_007077.2 Chromosome LG8; [Apis mellifera] gi:110825772 chromosome 8 complete sequence	1.08e-31	chr|AMe_AADG05006818|AMe_AADG05006818.1	Linkage group 8; [Apis mellifera] draft genome, Amel_4.0.	3e-47	ens|ENSAPMP00000004812	pep:novel group:AMEL2.0:GroupUn:30623906:30625364:-1 gene:ENSAPMG00000002759 transcript:ENSAPMT00000004812	2e-45	2	M
SI.CL.23.cl.2356.Contig1	gnl|Amel|GB17848-PA	1e-47	chr|NC_007084|NC_007084.2 Chromosome LG15; [Apis mellifera] gi:110825764 chromosome 15 complete sequence	2.14e-19	--	--	--	--	--	--	--	M
SI.CL.32.cl.3232.Contig2	gnl|Amel|GB16019-PA	1e-47	--	--	chr|AMe_AADG05008114|AMe_AADG05008114.1	Linkage group Un; [Apis mellifera] draft genome, Amel_4.0.	1e-20	--	--	--	--	M
SiJWG03BAM.scf	gnl|Amel|GB16886-PA	1e-47	--	--	chr|AMe_AADG05007644|AMe_AADG05007644.1	Linkage group Un; [Apis mellifera] draft genome, Amel_4.0.	1e-10	ens|ENSAPMP00000029816	pep:novel group:AMEL2.0:GroupUn:31214134:31214729:1 gene:ENSAPMG00000013578 transcript:ENSAPMT00000029818	8e-23	7	M
SiJWE08BBF.scf	gnl|Amel|GB13012-PA	2e-47	chr|NC_007076|NC_007076.2 Chromosome LG7; [Apis mellifera] gi:110825771 chromosome 7 complete sequence	5.29e-58	chr|AMe_AADG05000453|AMe_AADG05000453.1	Linkage group 1; [Apis mellifera] draft genome, Amel_4.0.	6e-41	ens|ENSAPMP00000017685	pep:known group:AMEL2.0:GroupUn:43051558:43052467:-1 gene:ENSAPMG00000015600 transcript:ENSAPMT00000017684	6e-45	10	M
SiJWF07AAY.scf	gnl|Amel|GB13699-PA	2e-47	chr|NC_007084|NC_007084.2 Chromosome LG15; [Apis mellifera] gi:110825764 chromosome 15 complete sequence	1.46e-54	chr|AMe_AADG05005228|AMe_AADG05005228.1	Linkage group 15; [Apis mellifera] draft genome, Amel_4.0.	1e-57	ens|ENSAPMP00000034805	pep:novel group:AMEL2.0:Group15:234638:238604:1 gene:ENSAPMG00000015071 transcript:ENSAPMT00000034805	2e-30	13	M
SI.CL.18.cl.1892.Contig1	gnl|Amel|GB11998-PA	2e-47	chr|NC_007070|NC_007070.2 Chromosome LG1; [Apis mellifera] gi:110825701 chromosome 1 complete sequence	8.74e-22	chr|AMe_AADG05000579|AMe_AADG05000579.1	Linkage group 1; [Apis mellifera] draft genome, Amel_4.0.	1e-14	--	--	--	--	M
SiJWB10ACO.scf	gnl|Amel|GB17737-PA	3e-47	chr|NC_007070|NC_007070.2 Chromosome LG1; [Apis mellifera] gi:110825701 chromosome 1 complete sequence	1.58e-51	chr|AMe_AADG05006438|AMe_AADG05006438.1	Linkage group 1; [Apis mellifera] draft genome, Amel_4.0.	3e-11	--	--	--	--	M
SI.CL.16.cl.1623.Contig1	gnl|Amel|GB15143-PA	3e-47	chr|NC_007073|NC_007073.2 Chromosome LG4; [Apis mellifera] gi:110825768 chromosome 4 complete sequence	8.12e-46	chr|AMe_AADG05001621|AMe_AADG05001621.1	Linkage group 4; [Apis mellifera] draft genome, Amel_4.0.	4e-17	ens|ENSAPMP00000024403	pep:known group:AMEL2.0:Group4:2301747:2302592:-1 gene:ENSAPMG00000013767 transcript:ENSAPMT00000024399	1e-41	13	M
SiJWE09BCS2.scf	gnl|Amel|GB12099-PA	3e-47	--	--	--	--	--	--	--	--	--	M
SI.CL.36.cl.3682.Contig1	gnl|Amel|GB10162-PA	4e-47	chr|NC_007080|NC_007080.2 Chromosome LG11; [Apis mellifera] gi:110825732 chromosome 11 complete sequence	5.29e-54	--	--	--	--	--	--	--	M
SiJWG08ADH.scf	gnl|Amel|GB10797-PA	4e-47	chr|NC_007075|NC_007075.2 Chromosome LG6; [Apis mellifera] gi:110825770 chromosome 6 complete sequence	7.11e-46	--	--	--	--	--	--	--	M
SI.CL.17.cl.1703.Contig1	gnl|Amel|GB14698-PA	4e-47	chr|NC_007081|NC_007081.2 Chromosome LG12; [Apis mellifera] gi:110825756 chromosome 12 complete sequence	6.58e-36	--	--	--	--	--	--	--	M
SI.CL.12.cl.1282.Contig1	gnl|Amel|GB20115-PA	5e-47	chr|NC_007084|NC_007084.2 Chromosome LG15; [Apis mellifera] gi:110825764 chromosome 15 complete sequence	5.82e-53	chr|AMe_AADG05005372|AMe_AADG05005372.1	Linkage group 15; [Apis mellifera] draft genome, Amel_4.0.	3e-18	--	--	--	--	M
SiJWD12BDY.scf	gnl|Amel|GB19295-PA	5e-47	--	--	chr|AMe_AADG05005784|AMe_AADG05005784.1	Linkage group Un; [Apis mellifera] draft genome, Amel_4.0.	5e-08	--	--	--	--	M
SI.CL.6.cl.677.Contig1	gnl|Amel|GB18695-PA	6e-47	chr|NC_007080|NC_007080.2 Chromosome LG11; [Apis mellifera] gi:110825732 chromosome 11 complete sequence	1.22e-41	chr|AMe_AADG05004195|AMe_AADG05004195.1	Linkage group 11; [Apis mellifera] draft genome, Amel_4.0.	9e-16	--	--	--	--	M
SI.CL.6.cl.601.Contig1	gnl|Amel|GB14900-PA	6e-47	--	--	--	--	--	--	--	--	--	M
SI.CL.17.cl.1778.Contig1	gnl|Amel|GB14195-PA	9e-47	--	--	chr|AMe_AADG05007568|AMe_AADG05007568.1	Linkage group Un; [Apis mellifera] draft genome, Amel_4.0.	2e-32	--	--	--	--	M
SI.CL.9.cl.956.Contig1	gnl|Amel|GB15816-PA	1e-46	chr|NC_007074|NC_007074.2 Chromosome LG5; [Apis mellifera] gi:110825769 chromosome 5 complete sequence	1.57e-34	chr|AMe_AADG05002062|AMe_AADG05002062.1	Linkage group 5; [Apis mellifera] draft genome, Amel_4.0.	3e-12	ens|ENSAPMP00000003931	pep:known group:AMEL2.0:Group5:9494727:9496708:1 gene:ENSAPMG00000002278 transcript:ENSAPMT00000003931	2e-44	4	M
SiJWH01BBJ2.scf	gnl|Amel|GB18230-PA	1e-46	--	--	--	--	--	--	--	--	--	M
SI.CL.35.cl.3538.Contig1	gnl|Amel|GB14160-PA	2e-46	chr|NC_007070|NC_007070.2 Chromosome LG1; [Apis mellifera] gi:110825701 chromosome 1 complete sequence	1.97e-45	chr|AMe_AADG05008379|AMe_AADG05008379.1	Linkage group Un; [Apis mellifera] draft genome, Amel_4.0.	5e-13	ens|ENSAPMP00000034588	pep:novel group:AMEL2.0:GroupUn:2737930:2740121:-1 gene:ENSAPMG00000010300 transcript:ENSAPMT00000034588	1e-38	3	M
SiJWB09ACU.scf	gnl|Amel|GB10969-PA	2e-46	chr|NC_007080|NC_007080.2 Chromosome LG11; [Apis mellifera] gi:110825732 chromosome 11 complete sequence	8.33e-34	--	--	--	--	--	--	--	M
SiJWC04ABK.scf	gnl|Amel|GB17825-PA	2e-46	chr|NC_007075|NC_007075.2 Chromosome LG6; [Apis mellifera] gi:110825770 chromosome 6 complete sequence	2.1e-32	chr|AMe_AADG05006651|AMe_AADG05006651.1	Linkage group 6; [Apis mellifera] draft genome, Amel_4.0.	6e-07	--	--	--	--	M
SI.CL.9.cl.906.SiJWF01BAY2.scf	gnl|Amel|GB16412-PA	3e-46	chr|NC_007078|NC_007078.2 Chromosome LG9; [Apis mellifera] gi:110825774 chromosome 9 complete sequence	2.88e-49	chr|AMe_AADG05003575|AMe_AADG05003575.1	Linkage group 9; [Apis mellifera] draft genome, Amel_4.0.	5e-11	ens|ENSAPMP00000001038	pep:novel group:AMEL2.0:Group9:5447361:5450159:1 gene:ENSAPMG00000000643 transcript:ENSAPMT00000001038	4e-44	4	M
SiJWB05BCR.scf	gnl|Amel|GB16643-PA	4e-46	chr|NC_007083|NC_007083.2 Chromosome LG14; [Apis mellifera] gi:110825763 chromosome 14 complete sequence	5.72e-22	chr|AMe_AADG05005158|AMe_AADG05005158.1	Linkage group 14; [Apis mellifera] draft genome, Amel_4.0.	1e-05	--	--	--	--	M
SI.CL.10.cl.1096.Contig1	gnl|Amel|GB17595-PA	5e-46	--	--	--	--	--	--	--	--	--	M
SiJWB01BCB2.scf	gnl|Amel|GB13531-PA	6e-46	chr|NC_007070|NC_007070.2 Chromosome LG1; [Apis mellifera] gi:110825701 chromosome 1 complete sequence	2.74e-58	chr|AMe_AADG05000661|AMe_AADG05000661.1	Linkage group 1; [Apis mellifera] draft genome, Amel_4.0.	2e-31	--	--	--	--	M
SI.CL.37.cl.3791.Contig1	gnl|Amel|GB12711-PA	7e-46	chr|NC_007077|NC_007077.2 Chromosome LG8; [Apis mellifera] gi:110825772 chromosome 8 complete sequence	9.69e-35	--	--	--	--	--	--	--	M
SI.CL.3.cl.320.Contig2	gnl|Amel|GB14372-PA	8e-46	chr|NC_007073|NC_007073.2 Chromosome LG4; [Apis mellifera] gi:110825768 chromosome 4 complete sequence	9.67e-24	chr|AMe_AADG05010142|AMe_AADG05010142.1	Linkage group Un; [Apis mellifera] draft genome, Amel_4.0.	3e-06	ens|ENSAPMP00000035760	pep:novel group:AMEL2.0:GroupUn:92135605:92140849:1 gene:ENSAPMG00000015792 transcript:ENSAPMT00000035760	3e-55	3	M
SiJWG01CAC2.scf	gnl|Amel|GB11630-PA	9e-46	chr|NC_007073|NC_007073.2 Chromosome LG4; [Apis mellifera] gi:110825768 chromosome 4 complete sequence	2.96e-51	chr|AMe_AADG05001553|AMe_AADG05001553.1	Linkage group 4; [Apis mellifera] draft genome, Amel_4.0.	9e-28	ens|ENSAPMP00000015066	pep:novel group:AMEL2.0:Group4:194410:200939:-1 gene:ENSAPMG00000008612 transcript:ENSAPMT00000015066	3e-42	4	M
SI.CL.23.cl.2318.SiJWH07AEA.scf	gnl|Amel|GB18853-PA	1e-45	chr|NC_007076|NC_007076.2 Chromosome LG7; [Apis mellifera] gi:110825771 chromosome 7 complete sequence	2.1e-42	chr|AMe_AADG05001036|AMe_AADG05001036.1	Linkage group 2; [Apis mellifera] draft genome, Amel_4.0.	3e-27	--	--	--	--	M
SI.CL.18.cl.1800.SiJWG09AAY.scf	gnl|Amel|GB10913-PA	1e-45	chr|NC_007070|NC_007070.2 Chromosome LG1; [Apis mellifera] gi:110825701 chromosome 1 complete sequence	4.97e-37	chr|AMe_AADG05000182|AMe_AADG05000182.1	Linkage group 1; [Apis mellifera] draft genome, Amel_4.0.	8e-25	ens|ENSAPMP00000013467	pep:known group:AMEL2.0:Group1:4327168:4328113:1 gene:ENSAPMG00000007700 transcript:ENSAPMT00000013467	1e-43	2	M
SI.CL.28.cl.2817.Contig1	gnl|Amel|GB19006-PA	2e-45	chr|NC_007074|NC_007074.2 Chromosome LG5; [Apis mellifera] gi:110825769 chromosome 5 complete sequence	1.89e-36	chr|AMe_AADG05001804|AMe_AADG05001804.1	Linkage group 4; [Apis mellifera] draft genome, Amel_4.0.	8e-19	ens|ENSAPMP00000006048	pep:novel group:AMEL2.0:Group4:9667892:9669676:1 gene:ENSAPMG00000003441 transcript:ENSAPMT00000006048	3e-43	3	M
SiJWB04CAP.scf	gnl|Amel|GB11813-PA	2e-45	--	--	chr|AMe_AADG05008419|AMe_AADG05008419.1	Linkage group Un; [Apis mellifera] draft genome, Amel_4.0.	4e-08	--	--	--	--	M
SiJWF01AAZ.scf	gnl|Amel|GB13144-PA	2e-45	--	--	--	--	--	--	--	--	--	M
SI.CL.31.cl.3182.SiJWD03BBU.scf	gnl|Amel|GB16138-PA	2e-45	--	--	--	--	--	--	--	--	--	M
SI.CL.19.cl.1961.SiJWD04AAL.scf	gnl|Amel|GB18495-PA	3e-45	chr|NC_007074|NC_007074.2 Chromosome LG5; [Apis mellifera] gi:110825769 chromosome 5 complete sequence	6.54e-55	chr|AMe_AADG05001997|AMe_AADG05001997.1	Linkage group 5; [Apis mellifera] draft genome, Amel_4.0.	8e-53	--	--	--	--	M
SI.CL.14.cl.1476.Contig1	gnl|Amel|GB13576-PA	3e-45	--	--	--	--	--	ens|ENSAPMP00000013401	pep:novel group:AMEL2.0:GroupUn:3533622:3540211:1 gene:ENSAPMG00000001903 transcript:ENSAPMT00000013401	2e-32	7	M
SI.CL.12.cl.1245.Contig1	gnl|Amel|GB19958-PA	6e-45	chr|NC_007074|NC_007074.2 Chromosome LG5; [Apis mellifera] gi:110825769 chromosome 5 complete sequence	2.59e-16	--	--	--	--	--	--	--	M
SI.CL.18.cl.1870.Contig1	gnl|Amel|GB13947-PA	7e-45	chr|NC_007070|NC_007070.2 Chromosome LG1; [Apis mellifera] gi:110825701 chromosome 1 complete sequence	9.55e-37	--	--	--	ens|ENSAPMP00000003895	pep:novel group:AMEL2.0:GroupUn:10353560:10354211:-1 gene:ENSAPMG00000002259 transcript:ENSAPMT00000003895	3e-14	8	M
SiJWH11ADL.scf	gnl|Amel|GB12850-PA	1e-44	chr|NC_007080|NC_007080.2 Chromosome LG11; [Apis mellifera] gi:110825732 chromosome 11 complete sequence	2.59e-47	--	--	--	ens|ENSAPMP00000034142	pep:novel group:AMEL2.0:Group11:5986741:5987658:-1 gene:ENSAPMG00000012066 transcript:ENSAPMT00000034141	6e-35	6	M
SiJWC03AEA.scf	gnl|Amel|GB14439-PA	1e-44	chr|NC_007074|NC_007074.2 Chromosome LG5; [Apis mellifera] gi:110825769 chromosome 5 complete sequence	3.71e-46	chr|AMe_AADG05001976|AMe_AADG05001976.1	Linkage group 5; [Apis mellifera] draft genome, Amel_4.0.	1e-17	ens|ENSAPMP00000022279	pep:novel group:AMEL2.0:Group5:6025999:6027645:1 gene:ENSAPMG00000013319 transcript:ENSAPMT00000022274	1e-23	16	M
SiJWE01ADI.scf	gnl|Amel|GB17032-PA	1e-44	chr|NC_007078|NC_007078.2 Chromosome LG9; [Apis mellifera] gi:110825774 chromosome 9 complete sequence	4.39e-15	chr|AMe_AADG05009907|AMe_AADG05009907.1	Linkage group Un; [Apis mellifera] draft genome, Amel_4.0.	2e-13	ens|ENSAPMP00000029030	pep:known group:AMEL2.0:Group9:6929150:6937191:1 gene:ENSAPMG00000016903 transcript:ENSAPMT00000029029	3e-16	4	M
SI.CL.19.cl.1998.Contig1	gnl|Amel|GB10619-PA	2e-44	chr|NC_007070|NC_007070.2 Chromosome LG1; [Apis mellifera] gi:110825701 chromosome 1 complete sequence	4.41e-53	chr|AMe_AADG05000188|AMe_AADG05000188.1	Linkage group 1; [Apis mellifera] draft genome, Amel_4.0.	1e-43	--	--	--	--	M
SI.CL.11.cl.1145.Contig1	gnl|Amel|GB16493-PA	2e-44	chr|NC_007083|NC_007083.2 Chromosome LG14; [Apis mellifera] gi:110825763 chromosome 14 complete sequence	3.18e-52	chr|AMe_AADG05006406|AMe_AADG05006406.1	Linkage group 14; [Apis mellifera] draft genome, Amel_4.0.	9e-06	--	--	--	--	M
SI.CL.27.cl.2720.Contig1	gnl|Amel|GB18491-PA	2e-44	chr|NC_007080|NC_007080.2 Chromosome LG11; [Apis mellifera] gi:110825732 chromosome 11 complete sequence	4.92e-43	chr|AMe_AADG05004372|AMe_AADG05004372.1	Linkage group 11; [Apis mellifera] draft genome, Amel_4.0.	6e-25	--	--	--	--	M
SI.CL.22.cl.2207.Contig1	gnl|Amel|GB10661-PA	3e-44	chr|NC_007074|NC_007074.2 Chromosome LG5; [Apis mellifera] gi:110825769 chromosome 5 complete sequence	8.81e-46	chr|AMe_AADG05002051|AMe_AADG05002051.1	Linkage group 5; [Apis mellifera] draft genome, Amel_4.0.	2e-30	--	--	--	--	M
SI.CL.23.cl.2327.Contig1	gnl|Amel|GB17073-PA	5e-44	chr|NC_007070|NC_007070.2 Chromosome LG1; [Apis mellifera] gi:110825701 chromosome 1 complete sequence	5.61e-26	--	--	--	--	--	--	--	M
SI.CL.24.cl.2486.Contig1	gnl|Amel|GB14919-PA	6e-44	chr|NC_007073|NC_007073.2 Chromosome LG4; [Apis mellifera] gi:110825768 chromosome 4 complete sequence	1.71e-40	--	--	--	--	--	--	--	M
SiJWG11AA1_evro_H06_3prime.scf	gnl|Amel|GB12173-PA	7e-44	chr|NC_007079|NC_007079.2 Chromosome LG10; [Apis mellifera] gi:110825711 chromosome 10 complete sequence	2.33e-38	--	--	--	--	--	--	--	M
SI.CL.41.cl.4173.Contig1	gnl|Amel|GB12400-PA	7e-44	chr|NC_007073|NC_007073.2 Chromosome LG4; [Apis mellifera] gi:110825768 chromosome 4 complete sequence	6.87e-24	--	--	--	--	--	--	--	M
SI.CL.7.cl.799.Contig1	gnl|Amel|GB14723-PA	8e-44	chr|NC_007070|NC_007070.2 Chromosome LG1; [Apis mellifera] gi:110825701 chromosome 1 complete sequence	8.84e-10	--	--	--	ens|ENSAPMP00000013547	pep:known group:AMEL2.0:Group1:8879446:8880987:-1 gene:ENSAPMG00000007741 transcript:ENSAPMT00000013547	3e-39	2	M
SI.CL.42.cl.4256.Contig1	gnl|Amel|GB11973-PA	1e-43	chr|NC_007085|NC_007085.2 Chromosome LG16; [Apis mellifera] gi:110825765 chromosome 16 complete sequence	2.46e-49	--	--	--	tr|Q306I1|Q306I1_APIME	(CYP4G11)Cytochrome P450 monooxygenase.[Apis mellifera]	1e-41	8	M
SiJWG03CAW.scf	gnl|Amel|GB17735-PA	1e-43	chr|NC_007076|NC_007076.2 Chromosome LG7; [Apis mellifera] gi:110825771 chromosome 7 complete sequence	1.54e-25	chr|AMe_AADG05002683|AMe_AADG05002683.1	Linkage group 7; [Apis mellifera] draft genome, Amel_4.0.	5e-08	--	--	--	--	M
SI.CL.36.cl.3696.Contig1	gnl|Amel|GB19302-PA	1e-43	chr|NC_007074|NC_007074.2 Chromosome LG5; [Apis mellifera] gi:110825769 chromosome 5 complete sequence	5.24e-14	--	--	--	ens|ENSAPMP00000015323	pep:known group:AMEL2.0:Group5:7668776:7669731:1 gene:ENSAPMG00000008752 transcript:ENSAPMT00000015323	3e-41	3	M
SiJWE11BBK.scf	gnl|Amel|GB11491-PA	2e-43	chr|NC_007077|NC_007077.2 Chromosome LG8; [Apis mellifera] gi:110825772 chromosome 8 complete sequence	6.34e-51	chr|AMe_AADG05003096|AMe_AADG05003096.1	Linkage group 8; [Apis mellifera] draft genome, Amel_4.0.	1e-23	--	--	--	--	M
SiJWH03BCR.scf	gnl|Amel|GB15154-PA	2e-43	chr|NC_007078|NC_007078.2 Chromosome LG9; [Apis mellifera] gi:110825774 chromosome 9 complete sequence	1.1e-48	chr|AMe_AADG05003443|AMe_AADG05003443.1	Linkage group 9; [Apis mellifera] draft genome, Amel_4.0.	7e-13	--	--	--	--	M
SiJWG06ADS.scf	gnl|Amel|GB15475-PA	2e-43	chr|NC_007070|NC_007070.2 Chromosome LG1; [Apis mellifera] gi:110825701 chromosome 1 complete sequence	2.78e-38	--	--	--	--	--	--	--	M
SI.CL.43.cl.4339.Contig1	gnl|Amel|GB14924-PA	2e-43	chr|NC_007073|NC_007073.2 Chromosome LG4; [Apis mellifera] gi:110825768 chromosome 4 complete sequence	9.72e-22	--	--	--	--	--	--	--	M
SiJWD12ADM.scf	gnl|Amel|GB18648-PA	2e-43	--	--	chr|AMe_AADG05010977|AMe_AADG05010977.1	Linkage group Un; [Apis mellifera] draft genome, Amel_4.0.	4e-11	--	--	--	--	M
SI.CL.32.cl.3251.Contig1	gnl|Amel|GB18486-PA	3e-43	chr|NC_007070|NC_007070.2 Chromosome LG1; [Apis mellifera] gi:110825701 chromosome 1 complete sequence	1.2e-38	chr|AMe_AADG05000441|AMe_AADG05000441.1	Linkage group 1; [Apis mellifera] draft genome, Amel_4.0.	7e-27	--	--	--	--	M
SiJWC01CAA.scf	gnl|Amel|GB17854-PA	3e-43	chr|NC_007080|NC_007080.2 Chromosome LG11; [Apis mellifera] gi:110825732 chromosome 11 complete sequence	4.09e-18	--	--	--	ens|ENSAPMP00000012741	pep:novel group:AMEL2.0:Group11:2971698:2972321:-1 gene:ENSAPMG00000007296 transcript:ENSAPMT00000012741	4e-19	4	M
SI.CL.42.cl.4273.Contig1	gnl|Amel|GB10692-PA	3e-43	chr|NC_007077|NC_007077.2 Chromosome LG8; [Apis mellifera] gi:110825772 chromosome 8 complete sequence	7.13e-16	--	--	--	--	--	--	--	M
SiJWE11BAG.scf	gnl|Amel|GB19145-PA	3e-43	--	--	--	--	--	--	--	--	--	M
SI.CL.3.cl.337.SiJWH06ADV.scf	gnl|Amel|GB14908-PA	4e-43	chr|NC_007073|NC_007073.2 Chromosome LG4; [Apis mellifera] gi:110825768 chromosome 4 complete sequence	6e-56	--	--	--	--	--	--	--	M
SI.CL.14.cl.1402.Contig1	gnl|Amel|GB14866-PA	5e-43	chr|NC_007083|NC_007083.2 Chromosome LG14; [Apis mellifera] gi:110825763 chromosome 14 complete sequence	1.8e-23	chr|AMe_AADG05005159|AMe_AADG05005159.1	Linkage group 14; [Apis mellifera] draft genome, Amel_4.0.	2e-18	--	--	--	--	M
SiJWD08AAM.scf	gnl|Amel|GB16855-PA	6e-43	chr|NC_007070|NC_007070.2 Chromosome LG1; [Apis mellifera] gi:110825701 chromosome 1 complete sequence	7.78e-45	--	--	--	ens|ENSAPMP00000017843	pep:novel group:AMEL2.0:Group4:3739056:3744806:-1 gene:ENSAPMG00000006435 transcript:ENSAPMT00000017842	6e-06	6	M
SiJWC10CAW.scf	gnl|Amel|GB14418-PA	9e-43	chr|NC_007083|NC_007083.2 Chromosome LG14; [Apis mellifera] gi:110825763 chromosome 14 complete sequence	7.1e-45	--	--	--	--	--	--	--	M
SiJWB03ADT.scf	gnl|Amel|GB14195-PA	9e-43	--	--	chr|AMe_AADG05007568|AMe_AADG05007568.1	Linkage group Un; [Apis mellifera] draft genome, Amel_4.0.	4e-42	--	--	--	--	M
SI.CL.3.cl.316.Contig1	gnl|Amel|GB15633-PA	1e-42	chr|NC_007081|NC_007081.2 Chromosome LG12; [Apis mellifera] gi:110825756 chromosome 12 complete sequence	8.45e-44	chr|AMe_AADG05004643|AMe_AADG05004643.1	Linkage group 12; [Apis mellifera] draft genome, Amel_4.0.	1e-58	ens|ENSAPMP00000034522	pep:novel group:AMEL2.0:GroupUn:128033377:128034922:-1 gene:ENSAPMG00000011145 transcript:ENSAPMT00000034522	2e-40	9	M
SI.CL.11.cl.1143.Contig1	gnl|Amel|GB19222-PA	1e-42	chr|NC_007070|NC_007070.2 Chromosome LG1; [Apis mellifera] gi:110825701 chromosome 1 complete sequence	7.31e-17	--	--	--	ens|ENSAPMP00000023480	pep:novel group:AMEL2.0:GroupUn:79126103:79128689:1 gene:ENSAPMG00000015118 transcript:ENSAPMT00000023476	6e-23	3	M
SiJWB10AAN.scf	gnl|Amel|GB11604-PA	2e-42	chr|NC_007073|NC_007073.2 Chromosome LG4; [Apis mellifera] gi:110825768 chromosome 4 complete sequence	1.42e-36	--	--	--	--	--	--	--	M
SiJWE01AAJ.scf	gnl|Amel|GB11703-PA	2e-42	chr|NC_007070|NC_007070.2 Chromosome LG1; [Apis mellifera] gi:110825701 chromosome 1 complete sequence	6.46e-28	--	--	--	ens|ENSAPMP00000003682	pep:known group:AMEL2.0:Group1:6685521:6688797:1 gene:ENSAPMG00000002136 transcript:ENSAPMT00000003682	1e-39	3	M
SiJWD04AEA.scf	gnl|Amel|GB10203-PA	2e-42	--	--	chr|AMe_AADG05015805|AMe_AADG05015805.1	Linkage group Un; [Apis mellifera] draft genome, Amel_4.0.	2e-06	ens|ENSAPMP00000011715	pep:known group:AMEL2.0:GroupUn:284369460:284370211:-1 gene:ENSAPMG00000006734 transcript:ENSAPMT00000011715	1e-34	16	M
SiJWF03BAJ.scf	gnl|Amel|GB11230-PA	2e-42	--	--	--	--	--	ens|ENSAPMP00000006417	pep:known group:AMEL2.0:GroupUn:31208479:31208853:1 gene:ENSAPMG00000003665 transcript:ENSAPMT00000006417	2e-11	19	M
SI.CL.36.cl.3625.Contig1	gnl|Amel|GB14982-PA	3e-42	chr|NC_007071|NC_007071.2 Chromosome LG2; [Apis mellifera] gi:110825766 chromosome 2 complete sequence	1.15e-48	chr|AMe_AADG05000785|AMe_AADG05000785.1	Linkage group 2; [Apis mellifera] draft genome, Amel_4.0.	5e-53	--	--	--	--	M
SI.CL.3.cl.320.Contig1	gnl|Amel|GB14372-PA	3e-42	chr|NC_007073|NC_007073.2 Chromosome LG4; [Apis mellifera] gi:110825768 chromosome 4 complete sequence	3.26e-20	--	--	--	ens|ENSAPMP00000035760	pep:novel group:AMEL2.0:GroupUn:92135605:92140849:1 gene:ENSAPMG00000015792 transcript:ENSAPMT00000035760	1e-56	3	M
SI.CL.9.cl.900.Contig1	gnl|Amel|GB15855-PA	4e-42	chr|NC_007075|NC_007075.2 Chromosome LG6; [Apis mellifera] gi:110825770 chromosome 6 complete sequence	1.9e-14	--	--	--	--	--	--	--	M
SiJWE01BBJ2.scf	gnl|Amel|GB12859-PA	6e-42	--	--	--	--	--	ens|ENSAPMP00000021124	pep:novel group:AMEL2.0:GroupUn:233977203:233977752:1 gene:ENSAPMG00000013464 transcript:ENSAPMT00000021118	7e-42	6	M
SI.CL.9.cl.946.SiJWG04ADP.scf	gnl|Amel|GB10690-PA	1e-41	chr|NC_007075|NC_007075.2 Chromosome LG6; [Apis mellifera] gi:110825770 chromosome 6 complete sequence	6.33e-49	--	--	--	--	--	--	--	M
SiJWD12ADC.scf	gnl|Amel|GB19857-PA	1e-41	chr|NC_007081|NC_007081.2 Chromosome LG12; [Apis mellifera] gi:110825756 chromosome 12 complete sequence	2.72e-48	chr|AMe_AADG05004660|AMe_AADG05004660.1	Linkage group 12; [Apis mellifera] draft genome, Amel_4.0.	1e-32	ens|ENSAPMP00000017701	pep:novel group:AMEL2.0:GroupUn:96184155:96185952:1 gene:ENSAPMG00000016568 transcript:ENSAPMT00000017700	6e-39	10	M
SI.CL.2.cl.222.Contig1	gnl|Amel|GB16167-PA	1e-41	chr|NC_007085|NC_007085.2 Chromosome LG16; [Apis mellifera] gi:110825765 chromosome 16 complete sequence	3.18e-41	--	--	--	ens|ENSAPMP00000006861	pep:novel group:AMEL2.0:Group16:4321043:4321538:1 gene:ENSAPMG00000003966 transcript:ENSAPMT00000006861	8e-22	16	M
SI.CL.6.cl.695.Contig1	gnl|Amel|GB14130-PA	1e-41	chr|NC_007071|NC_007071.2 Chromosome LG2; [Apis mellifera] gi:110825766 chromosome 2 complete sequence	3.46e-22	chr|AMe_AADG05007310|AMe_AADG05007310.1	Linkage group 2; [Apis mellifera] draft genome, Amel_4.0.	4e-17	--	--	--	--	M
SI.CL.25.cl.2550.Contig1	gnl|Amel|GB13110-PA	1e-41	--	--	--	--	--	ens|ENSAPMP00000030544	pep:known group:AMEL2.0:GroupUn:30153118:30154289:1 gene:ENSAPMG00000015655 transcript:ENSAPMT00000030543	2e-39	6	M
SI.CL.7.cl.724.Contig1	gnl|Amel|GB15179-PA	1e-41	--	--	--	--	--	ens|ENSAPMP00000010500	pep:known group:AMEL2.0:GroupUn:33970190:33973696:1 gene:ENSAPMG00000006084 transcript:ENSAPMT00000010500	3e-25	3	M
SI.CL.8.cl.855.Contig1	gnl|Amel|GB17800-PA	2e-41	--	--	chr|AMe_AADG05008385|AMe_AADG05008385.1	Linkage group Un; [Apis mellifera] draft genome, Amel_4.0.	4e-36	ens|ENSAPMP00000026937	pep:novel group:AMEL2.0:GroupUn:54053300:54054365:-1 gene:ENSAPMG00000015625 transcript:ENSAPMT00000026936	5e-30	4	M
SiJWC09AAV.scf	gnl|Amel|GB17779-PA	3e-41	chr|NC_007079|NC_007079.2 Chromosome LG10; [Apis mellifera] gi:110825711 chromosome 10 complete sequence	1.41e-49	chr|AMe_AADG05003852|AMe_AADG05003852.1	Linkage group 10; [Apis mellifera] draft genome, Amel_4.0.	8e-28	--	--	--	--	M
SI.CL.16.cl.1612.SiJWB12ADZ.scf	gnl|Amel|GB16155-PA	3e-41	chr|NC_007083|NC_007083.2 Chromosome LG14; [Apis mellifera] gi:110825763 chromosome 14 complete sequence	1.79e-49	--	--	--	--	--	--	--	M
SiJWA08ADH.scf	gnl|Amel|GB12980-PA	3e-41	chr|NC_007073|NC_007073.2 Chromosome LG4; [Apis mellifera] gi:110825768 chromosome 4 complete sequence	2.41e-42	--	--	--	--	--	--	--	M
SI.CL.17.cl.1783.Contig1	gnl|Amel|GB14304-PA	3e-41	chr|NC_007076|NC_007076.2 Chromosome LG7; [Apis mellifera] gi:110825771 chromosome 7 complete sequence	7.99e-36	--	--	--	--	--	--	--	M
SiJWD05ADK.scf	gnl|Amel|GB17715-PA	4e-41	chr|NC_007084|NC_007084.2 Chromosome LG15; [Apis mellifera] gi:110825764 chromosome 15 complete sequence	4.52e-43	chr|AMe_AADG05005468|AMe_AADG05005468.1	Linkage group 15; [Apis mellifera] draft genome, Amel_4.0.	2e-06	--	--	--	--	M
SI.CL.25.cl.2519.Contig1	gnl|Amel|GB19852-PA	5e-41	chr|NC_007077|NC_007077.2 Chromosome LG8; [Apis mellifera] gi:110825772 chromosome 8 complete sequence	2.36e-26	--	--	--	--	--	--	--	M
SiJWH12BBT.scf	gnl|Amel|GB13103-PA	6e-41	chr|NC_007073|NC_007073.2 Chromosome LG4; [Apis mellifera] gi:110825768 chromosome 4 complete sequence	3.89e-44	chr|AMe_AADG05006444|AMe_AADG05006444.1	Linkage group 4; [Apis mellifera] draft genome, Amel_4.0.	1e-60	--	--	--	--	M
SiJWA05BDK2.scf	gnl|Amel|GB14175-PA	6e-41	chr|NC_007083|NC_007083.2 Chromosome LG14; [Apis mellifera] gi:110825763 chromosome 14 complete sequence	1.02e-27	--	--	--	--	--	--	--	M
SI.CL.3.cl.312.Contig1	gnl|Amel|GB14642-PA	7e-41	chr|NC_007076|NC_007076.2 Chromosome LG7; [Apis mellifera] gi:110825771 chromosome 7 complete sequence	3.28e-50	chr|AMe_AADG05002861|AMe_AADG05002861.1	Linkage group 7; [Apis mellifera] draft genome, Amel_4.0.	2e-29	--	--	--	--	M
SI.CL.23.cl.2320.SiJWA11BCMR2E07.scf	gnl|Amel|GB13875-PA	7e-41	chr|NC_007084|NC_007084.2 Chromosome LG15; [Apis mellifera] gi:110825764 chromosome 15 complete sequence	2.41e-43	--	--	--	--	--	--	--	M
SI.CL.18.cl.1835.Contig1	gnl|Amel|GB14160-PA	7e-41	chr|NC_007070|NC_007070.2 Chromosome LG1; [Apis mellifera] gi:110825701 chromosome 1 complete sequence	3.8e-39	--	--	--	ens|ENSAPMP00000035426	pep:novel group:AMEL2.0:GroupUn:2737924:2738903:-1 gene:ENSAPMG00000010300 transcript:ENSAPMT00000035427	3e-35	2	M
SI.CL.1.cl.150.Contig1	gnl|Amel|GB14743-PA	1e-40	chr|NC_007083|NC_007083.2 Chromosome LG14; [Apis mellifera] gi:110825763 chromosome 14 complete sequence	7.47e-49	chr|AMe_AADG05005866|AMe_AADG05005866.1	Linkage group 14; [Apis mellifera] draft genome, Amel_4.0.	3e-11	--	--	--	--	M
SiJWG08BAS.scf	gnl|Amel|GB14775-PA	1e-40	chr|NC_007083|NC_007083.2 Chromosome LG14; [Apis mellifera] gi:110825763 chromosome 14 complete sequence	7.63e-47	chr|AMe_AADG05009278|AMe_AADG05009278.1	Linkage group 14; [Apis mellifera] draft genome, Amel_4.0.	7e-13	--	--	--	--	M
SI.CL.23.cl.2313.SiJWF04BBY.scf	gnl|Amel|GB15418-PA	2e-40	chr|NC_007071|NC_007071.2 Chromosome LG2; [Apis mellifera] gi:110825766 chromosome 2 complete sequence	8.92e-37	chr|AMe_AADG05001085|AMe_AADG05001085.1	Linkage group 2; [Apis mellifera] draft genome, Amel_4.0.	1e-08	--	--	--	--	M
SI.CL.4.cl.402.Contig1	gnl|Amel|GB12988-PA	2e-40	chr|NC_007077|NC_007077.2 Chromosome LG8; [Apis mellifera] gi:110825772 chromosome 8 complete sequence	4.81e-14	--	--	--	--	--	--	--	M
SiJWB02ABK.scf	gnl|Amel|GB18102-PA	3e-40	chr|NC_007082|NC_007082.2 Chromosome LG13; [Apis mellifera] gi:110825762 chromosome 13 complete sequence	6.77e-56	--	--	--	--	--	--	--	M
SiJWD03BBF.scf	gnl|Amel|GB14966-PA	3e-40	chr|NC_007080|NC_007080.2 Chromosome LG11; [Apis mellifera] gi:110825732 chromosome 11 complete sequence	4.56e-48	chr|AMe_AADG05004453|AMe_AADG05004453.1	Linkage group 11; [Apis mellifera] draft genome, Amel_4.0.	1e-05	--	--	--	--	M
SI.CL.20.cl.2078.Contig1	gnl|Amel|GB16959-PA	3e-40	chr|NC_007073|NC_007073.2 Chromosome LG4; [Apis mellifera] gi:110825768 chromosome 4 complete sequence	1.34e-12	--	--	--	ens|ENSAPMP00000035760	pep:novel group:AMEL2.0:GroupUn:92135605:92140849:1 gene:ENSAPMG00000015792 transcript:ENSAPMT00000035760	1e-44	9	M
SiJWG09AAR.scf	gnl|Amel|GB12607-PA	4e-40	chr|NC_007077|NC_007077.2 Chromosome LG8; [Apis mellifera] gi:110825772 chromosome 8 complete sequence	7.34e-51	--	--	--	tr|Q25BT8|Q25BT8_APIME	(hbg1)Alpha-glucosidase (EC 3.2.1.20).[Apis mellifera]	8e-38	6	M
SiJWD01AAJ.scf	gnl|Amel|GB17706-PA	4e-40	chr|NC_007085|NC_007085.2 Chromosome LG16; [Apis mellifera] gi:110825765 chromosome 16 complete sequence	3.8e-40	chr|AMe_AADG05007242|AMe_AADG05007242.1	Linkage group 16; [Apis mellifera] draft genome, Amel_4.0.	7e-10	--	--	--	--	M
SiJWB11ABA.scf	gnl|Amel|GB19319-PA	4e-40	chr|NC_007076|NC_007076.2 Chromosome LG7; [Apis mellifera] gi:110825771 chromosome 7 complete sequence	1.29e-24	chr|AMe_AADG05002942|AMe_AADG05002942.1	Linkage group 7; [Apis mellifera] draft genome, Amel_4.0.	1e-20	--	--	--	--	M
SI.CL.34.cl.3401.Contig1	gnl|Amel|GB14889-PA	4e-40	--	--	--	--	--	--	--	--	--	M
SI.CL.24.cl.2459.SiJWD12ADV.scf	gnl|Amel|GB17585-PA	4e-40	--	--	--	--	--	--	--	--	--	M
SI.CL.8.cl.899.Contig1	gnl|Amel|GB17696-PA	5e-40	chr|NC_007080|NC_007080.2 Chromosome LG11; [Apis mellifera] gi:110825732 chromosome 11 complete sequence	1.13e-45	--	--	--	--	--	--	--	M
SiJWH02ACH.scf	gnl|Amel|GB13641-PA	5e-40	chr|NC_007079|NC_007079.2 Chromosome LG10; [Apis mellifera] gi:110825711 chromosome 10 complete sequence	1.51e-32	--	--	--	ens|ENSAPMP00000026653	pep:novel group:AMEL2.0:Group10:2125903:2126425:-1 gene:ENSAPMG00000016998 transcript:ENSAPMT00000026653	2e-35	7	M
SiJWA05BDX.scf	gnl|Amel|GB12048-PA	5e-40	--	--	chr|AMe_AADG05016730|AMe_AADG05016730.1	Linkage group Un; [Apis mellifera] draft genome, Amel_4.0.	1e-05	ens|ENSAPMP00000033729	pep:novel group:AMEL2.0:GroupUn:241030055:241030716:1 gene:ENSAPMG00000002893 transcript:ENSAPMT00000033729	1e-23	12	M
SiJWE11ACD.scf	gnl|Amel|GB14701-PA	8e-40	chr|NC_007070|NC_007070.2 Chromosome LG1; [Apis mellifera] gi:110825701 chromosome 1 complete sequence	9.34e-43	--	--	--	--	--	--	--	M
SI.CL.33.cl.3369.Contig1	gnl|Amel|GB11509-PA	9e-40	chr|NC_007076|NC_007076.2 Chromosome LG7; [Apis mellifera] gi:110825771 chromosome 7 complete sequence	1.56e-37	chr|AMe_AADG05008330|AMe_AADG05008330.1	Linkage group 7; [Apis mellifera] draft genome, Amel_4.0.	2e-06	ens|ENSAPMP00000012254	pep:novel group:AMEL2.0:GroupUn:198586503:198596579:1 gene:ENSAPMG00000007019 transcript:ENSAPMT00000012254	5e-06	2	M
SiJWG07ACB.scf	gnl|Amel|GB10343-PA	1e-39	chr|NC_007070|NC_007070.2 Chromosome LG1; [Apis mellifera] gi:110825701 chromosome 1 complete sequence	6.58e-23	--	--	--	--	--	--	--	M
SI.CL.19.cl.1908.Contig1	gnl|Amel|GB16895-PA	1e-39	--	--	chr|AMe_AADG05009789|AMe_AADG05009789.1	Linkage group Un; [Apis mellifera] draft genome, Amel_4.0.	1e-10	ens|ENSAPMP00000007809	pep:novel group:AMEL2.0:GroupUn:63680449:63681184:1 gene:ENSAPMG00000004516 transcript:ENSAPMT00000007809	5e-28	3	M
SiJWB03CAA.scf	gnl|Amel|GB12435-PA	2e-39	chr|NC_007078|NC_007078.2 Chromosome LG9; [Apis mellifera] gi:110825774 chromosome 9 complete sequence	1.17e-42	--	--	--	--	--	--	--	M
SI.CL.17.cl.1771.Contig1	gnl|Amel|GB10041-PA	2e-39	chr|NC_007070|NC_007070.2 Chromosome LG1; [Apis mellifera] gi:110825701 chromosome 1 complete sequence	1.15e-40	chr|AMe_AADG05000255|AMe_AADG05000255.1	Linkage group 1; [Apis mellifera] draft genome, Amel_4.0.	6e-07	--	--	--	--	M
SiJWH06BAG.scf	gnl|Amel|GB15633-PA	2e-39	chr|NC_007081|NC_007081.2 Chromosome LG12; [Apis mellifera] gi:110825756 chromosome 12 complete sequence	2.57e-32	chr|AMe_AADG05004643|AMe_AADG05004643.1	Linkage group 12; [Apis mellifera] draft genome, Amel_4.0.	7e-16	--	--	--	--	M
SiJWF09CAB.scf	gnl|Amel|GB16903-PA	2e-39	chr|NC_007077|NC_007077.2 Chromosome LG8; [Apis mellifera] gi:110825772 chromosome 8 complete sequence	5.82e-27	chr|AMe_AADG05006818|AMe_AADG05006818.1	Linkage group 8; [Apis mellifera] draft genome, Amel_4.0.	1e-08	ens|ENSAPMP00000029790	pep:known group:AMEL2.0:GroupUn:30618923:30629064:1 gene:ENSAPMG00000002420 transcript:ENSAPMT00000029792	2e-32	11	M
SI.CL.32.cl.3253.Contig1	gnl|Amel|GB14798-PA	3e-39	chr|NC_007079|NC_007079.2 Chromosome LG10; [Apis mellifera] gi:110825711 chromosome 10 complete sequence	1.62e-61	chr|AMe_AADG05003823|AMe_AADG05003823.1	Linkage group 10; [Apis mellifera] draft genome, Amel_4.0.	2e-12	--	--	--	--	M
SiJWD12AAZ.scf	gnl|Amel|GB13302-PA	3e-39	chr|NC_007078|NC_007078.2 Chromosome LG9; [Apis mellifera] gi:110825774 chromosome 9 complete sequence	3.84e-46	chr|AMe_AADG05003575|AMe_AADG05003575.1	Linkage group 9; [Apis mellifera] draft genome, Amel_4.0.	1e-11	--	--	--	--	M
SiJWB07AAN.scf	gnl|Amel|GB10290-PA	3e-39	chr|NC_007080|NC_007080.2 Chromosome LG11; [Apis mellifera] gi:110825732 chromosome 11 complete sequence	1.97e-39	chr|AMe_AADG05004121|AMe_AADG05004121.1	Linkage group 11; [Apis mellifera] draft genome, Amel_4.0.	1e-41	--	--	--	--	M
SI.CL.27.cl.2754.SiJWH06BBI.scf	gnl|Amel|GB12047-PA	3e-39	--	--	--	--	--	ens|ENSAPMP00000031656	pep:novel group:AMEL2.0:GroupUn:38422076:38427480:-1 gene:ENSAPMG00000012550 transcript:ENSAPMT00000031655	1e-31	3	M
SI.CL.23.cl.2320.SiJWA06ADA.scf	gnl|Amel|GB13875-PA	7e-39	chr|NC_007084|NC_007084.2 Chromosome LG15; [Apis mellifera] gi:110825764 chromosome 15 complete sequence	9.24e-41	chr|AMe_AADG05005369|AMe_AADG05005369.1	Linkage group 15; [Apis mellifera] draft genome, Amel_4.0.	6e-07	--	--	--	--	M
SiJWF11AAR.scf	gnl|Amel|GB15298-PA	1e-38	chr|NC_007075|NC_007075.2 Chromosome LG6; [Apis mellifera] gi:110825770 chromosome 6 complete sequence	5.12e-57	--	--	--	--	--	--	--	M
SI.CL.29.cl.2951.Contig1	gnl|Amel|GB19122-PA	1e-38	chr|NC_007084|NC_007084.2 Chromosome LG15; [Apis mellifera] gi:110825764 chromosome 15 complete sequence	4.4e-44	chr|AMe_AADG05006590|AMe_AADG05006590.1	Linkage group 15; [Apis mellifera] draft genome, Amel_4.0.	3e-06	--	--	--	--	M
SI.CL.33.cl.3336.Contig1	gnl|Amel|GB13769-PA	1e-38	chr|NC_007077|NC_007077.2 Chromosome LG8; [Apis mellifera] gi:110825772 chromosome 8 complete sequence	3.67e-43	--	--	--	ens|ENSAPMP00000014355	pep:novel group:AMEL2.0:Group8:6305524:6306164:-1 gene:ENSAPMG00000008194 transcript:ENSAPMT00000014355	5e-28	10	M
SI.CL.9.cl.970.Contig1	gnl|Amel|GB16568-PA	2e-38	chr|NC_007085|NC_007085.2 Chromosome LG16; [Apis mellifera] gi:110825765 chromosome 16 complete sequence	9.53e-27	--	--	--	ens|ENSAPMP00000007261	pep:novel group:AMEL2.0:GroupUn:92955589:92956821:-1 gene:ENSAPMG00000004190 transcript:ENSAPMT00000007261	2e-36	3	M
SI.CL.40.cl.4037.Contig1	gnl|Amel|GB14287-PA	2e-38	chr|NC_007076|NC_007076.2 Chromosome LG7; [Apis mellifera] gi:110825771 chromosome 7 complete sequence	1.09e-23	--	--	--	ens|ENSAPMP00000004821	pep:novel group:AMEL2.0:GroupUn:14135339:14136224:1 gene:ENSAPMG00000002766 transcript:ENSAPMT00000004821	3e-28	5	M
SiJWE12BBV2.scf	gnl|Amel|GB16100-PA	2e-38	chr|NC_007070|NC_007070.2 Chromosome LG1; [Apis mellifera] gi:110825701 chromosome 1 complete sequence	2.27e-23	chr|AMe_AADG05006797|AMe_AADG05006797.1	Linkage group 1; [Apis mellifera] draft genome, Amel_4.0.	5e-08	--	--	--	--	M
SI.CL.40.cl.4039.Contig1	gnl|Amel|GB18673-PA	2e-38	chr|NC_007070|NC_007070.2 Chromosome LG1; [Apis mellifera] gi:110825701 chromosome 1 complete sequence	3.52e-18	chr|AMe_AADG05000226|AMe_AADG05000226.1	Linkage group 1; [Apis mellifera] draft genome, Amel_4.0.	2e-15	--	--	--	--	M
SI.CL.13.cl.1330.SiJWA04BCB2.scf	gnl|Amel|GB14598-PA	2e-38	--	--	chr|AMe_AADG05006971|AMe_AADG05006971.1	Linkage group Un; [Apis mellifera] draft genome, Amel_4.0.	1e-14	--	--	--	--	M
SiJWE12ACC.scf	gnl|Amel|GB15735-PA	3e-38	chr|NC_007074|NC_007074.2 Chromosome LG5; [Apis mellifera] gi:110825769 chromosome 5 complete sequence	2.45e-19	--	--	--	--	--	--	--	M
SI.CL.12.cl.1222.Contig1	gnl|Amel|GB13139-PA	4e-38	chr|NC_007081|NC_007081.2 Chromosome LG12; [Apis mellifera] gi:110825756 chromosome 12 complete sequence	2.35e-45	--	--	--	--	--	--	--	M
SI.CL.43.cl.4314.SiJWD12BDQR5F10.scf	gnl|Amel|GB11597-PA	4e-38	--	--	--	--	--	ens|ENSAPMP00000021348	pep:novel group:AMEL2.0:GroupUn:77589276:77590550:-1 gene:ENSAPMG00000010316 transcript:ENSAPMT00000021341	2e-16	5	M
SI.CL.28.cl.2890.Contig1	gnl|Amel|GB13006-PA	5e-38	chr|NC_007073|NC_007073.2 Chromosome LG4; [Apis mellifera] gi:110825768 chromosome 4 complete sequence	7.57e-39	chr|AMe_AADG05012415|AMe_AADG05012415.1	Linkage group Un; [Apis mellifera] draft genome, Amel_4.0.	4e-21	--	--	--	--	M
SI.CL.35.cl.3506.Contig1	gnl|Amel|GB12887-PA	6e-38	chr|NC_007072|NC_007072.2 Chromosome LG3; [Apis mellifera] gi:110825767 chromosome 3 complete sequence	2.37e-44	--	--	--	--	--	--	--	M
SiJWE08ACO.scf	gnl|Amel|GB18407-PA	9e-38	chr|NC_007071|NC_007071.2 Chromosome LG2; [Apis mellifera] gi:110825766 chromosome 2 complete sequence	2.83e-31	chr|AMe_AADG05000860|AMe_AADG05000860.1	Linkage group 2; [Apis mellifera] draft genome, Amel_4.0.	9e-15	--	--	--	--	M
SI.CL.9.cl.946.Contig1	gnl|Amel|GB10690-PA	1e-37	chr|NC_007075|NC_007075.2 Chromosome LG6; [Apis mellifera] gi:110825770 chromosome 6 complete sequence	1.39e-43	--	--	--	--	--	--	--	M
SI.CL.23.cl.2300.Contig1	gnl|Amel|GB13870-PA	1e-37	chr|NC_007077|NC_007077.2 Chromosome LG8; [Apis mellifera] gi:110825772 chromosome 8 complete sequence	1.8e-34	--	--	--	ens|ENSAPMP00000017845	pep:novel group:AMEL2.0:Group8:2615502:2616769:1 gene:ENSAPMG00000012306 transcript:ENSAPMT00000017844	1e-29	5	M
SI.CL.2.cl.294.Contig1	gnl|Amel|GB12921-PA	1e-37	chr|NC_007080|NC_007080.2 Chromosome LG11; [Apis mellifera] gi:110825732 chromosome 11 complete sequence	3.94e-07	chr|AMe_AADG05010273|AMe_AADG05010273.1	Linkage group Un; [Apis mellifera] draft genome, Amel_4.0.	5e-08	ens|ENSAPMP00000031953	pep:novel group:AMEL2.0:GroupUn:91660700:91661562:1 gene:ENSAPMG00000015559 transcript:ENSAPMT00000031953	7e-13	3	M
SiJWC05ADM.scf	gnl|Amel|GB19844-PA	2e-37	chr|NC_007071|NC_007071.2 Chromosome LG2; [Apis mellifera] gi:110825766 chromosome 2 complete sequence	5.09e-28	--	--	--	--	--	--	--	M
SiJWA02ADF.scf	gnl|Amel|GB12964-PA	3e-37	chr|NC_007076|NC_007076.2 Chromosome LG7; [Apis mellifera] gi:110825771 chromosome 7 complete sequence	1.18e-44	chr|AMe_AADG05006134|AMe_AADG05006134.1	Linkage group 7; [Apis mellifera] draft genome, Amel_4.0.	1e-45	--	--	--	--	M
SiJWG07ACG.scf	gnl|Amel|GB12321-PA	1e-36	chr|NC_007077|NC_007077.2 Chromosome LG8; [Apis mellifera] gi:110825772 chromosome 8 complete sequence	4.48e-37	chr|AMe_AADG05007888|AMe_AADG05007888.1	Linkage group 8; [Apis mellifera] draft genome, Amel_4.0.	4e-08	--	--	--	--	M
SiJWH08ABO.scf	gnl|Amel|GB16715-PA	1e-36	chr|NC_007083|NC_007083.2 Chromosome LG14; [Apis mellifera] gi:110825763 chromosome 14 complete sequence	2.03e-26	--	--	--	--	--	--	--	M
SI.CL.3.cl.317.Contig1	gnl|Amel|GB10428-PA	2e-36	chr|NC_007071|NC_007071.2 Chromosome LG2; [Apis mellifera] gi:110825766 chromosome 2 complete sequence	6.49e-43	--	--	--	--	--	--	--	M
SiJWH07BAW2.scf	gnl|Amel|GB10989-PA	2e-36	chr|NC_007078|NC_007078.2 Chromosome LG9; [Apis mellifera] gi:110825774 chromosome 9 complete sequence	1.17e-37	chr|AMe_AADG05003443|AMe_AADG05003443.1	Linkage group 9; [Apis mellifera] draft genome, Amel_4.0.	8e-19	ens|ENSAPMP00000025547	pep:novel group:AMEL2.0:Group9:953203:955883:-1 gene:ENSAPMG00000009019 transcript:ENSAPMT00000025548	4e-34	2	M
SiJWH07AAH.scf	gnl|Amel|GB13993-PA	2e-36	chr|NC_007079|NC_007079.2 Chromosome LG10; [Apis mellifera] gi:110825711 chromosome 10 complete sequence	2.94e-33	--	--	--	ens|ENSAPMP00000009932	pep:known group:AMEL2.0:Group10:4890662:4891888:1 gene:ENSAPMG00000005734 transcript:ENSAPMT00000009932	3e-34	12	M
SiJWD09ADC.scf	gnl|Amel|GB10653-PA	3e-36	chr|NC_007078|NC_007078.2 Chromosome LG9; [Apis mellifera] gi:110825774 chromosome 9 complete sequence	3.12e-19	--	--	--	--	--	--	--	M
SI.CL.18.cl.1872.Contig1	gnl|Amel|GB10266-PA	3e-36	chr|NC_007081|NC_007081.2 Chromosome LG12; [Apis mellifera] gi:110825756 chromosome 12 complete sequence	1.9e-09	chr|AMe_AADG05007973|AMe_AADG05007973.1	Linkage group Un; [Apis mellifera] draft genome, Amel_4.0.	1e-11	--	--	--	--	M
SI.CL.6.cl.678.SiJWC11BDI2.scf	gnl|Amel|GB18959-PA	4e-36	chr|NC_007073|NC_007073.2 Chromosome LG4; [Apis mellifera] gi:110825768 chromosome 4 complete sequence	2.49e-43	chr|AMe_AADG05001758|AMe_AADG05001758.1	Linkage group 4; [Apis mellifera] draft genome, Amel_4.0.	3e-40	--	--	--	--	M
SI.CL.25.cl.2590.Contig1	gnl|Amel|GB13765-PA	4e-36	chr|NC_007072|NC_007072.2 Chromosome LG3; [Apis mellifera] gi:110825767 chromosome 3 complete sequence	2.85e-35	chr|AMe_AADG05001346|AMe_AADG05001346.1	Linkage group 3; [Apis mellifera] draft genome, Amel_4.0.	3e-24	--	--	--	--	M
SI.CL.42.cl.4282.Contig1	gnl|Amel|GB17559-PA	4e-36	chr|NC_007079|NC_007079.2 Chromosome LG10; [Apis mellifera] gi:110825711 chromosome 10 complete sequence	8.84e-33	--	--	--	--	--	--	--	M
SI.CL.43.cl.4335.Contig1	gnl|Amel|GB14282-PA	5e-36	chr|NC_007084|NC_007084.2 Chromosome LG15; [Apis mellifera] gi:110825764 chromosome 15 complete sequence	5.36e-31	--	--	--	ens|ENSAPMP00000028273	pep:novel group:AMEL2.0:Group1:5161145:5166412:-1 gene:ENSAPMG00000011352 transcript:ENSAPMT00000028271	1e-09	7	M
SI.CL.34.cl.3435.Contig1	gnl|Amel|GB16371-PA	5e-36	chr|NC_007072|NC_007072.2 Chromosome LG3; [Apis mellifera] gi:110825767 chromosome 3 complete sequence	3.03e-27	--	--	--	--	--	--	--	M
SI.CL.9.cl.992.SiJWE10_pcr3_tag.scf	gnl|Amel|GB11482-PA	5e-36	chr|NC_007074|NC_007074.2 Chromosome LG5; [Apis mellifera] gi:110825769 chromosome 5 complete sequence	1.8e-11	chr|AMe_AADG05008898|AMe_AADG05008898.1	Linkage group Un; [Apis mellifera] draft genome, Amel_4.0.	4e-16	ens|ENSAPMP00000032569	pep:novel group:AMEL2.0:GroupUn:72172362:72173496:-1 gene:ENSAPMG00000000118 transcript:ENSAPMT00000032569	6e-49	2	M
SI.CL.35.cl.3575.Contig1	gnl|Amel|GB18453-PA	6e-36	--	--	--	--	--	--	--	--	--	M
SiJWA10AAT.scf	gnl|Amel|GB10920-PA	9e-36	chr|NC_007077|NC_007077.2 Chromosome LG8; [Apis mellifera] gi:110825772 chromosome 8 complete sequence	7.26e-30	--	--	--	ens|ENSAPMP00000022182	pep:known group:AMEL2.0:GroupUn:1852500:1855680:-1 gene:ENSAPMG00000006903 transcript:ENSAPMT00000022176	2e-33	8	M
SI.CL.8.cl.831.Contig1	gnl|Amel|GB15827-PA	1e-35	chr|NC_007075|NC_007075.2 Chromosome LG6; [Apis mellifera] gi:110825770 chromosome 6 complete sequence	1.44e-35	chr|AMe_AADG05002522|AMe_AADG05002522.1	Linkage group 6; [Apis mellifera] draft genome, Amel_4.0.	9e-09	--	--	--	--	M
SI.CL.31.cl.3176.Contig1	gnl|Amel|GB10109-PA	1e-35	chr|NC_007080|NC_007080.2 Chromosome LG11; [Apis mellifera] gi:110825732 chromosome 11 complete sequence	2.57e-28	--	--	--	--	--	--	--	M
SiJWB08ADZ.scf	gnl|Amel|GB11973-PA	1e-35	chr|NC_007085|NC_007085.2 Chromosome LG16; [Apis mellifera] gi:110825765 chromosome 16 complete sequence	8.75e-28	--	--	--	--	--	--	--	M
SiJWG08BAP.scf	gnl|Amel|GB11617-PA	1e-35	chr|NC_007083|NC_007083.2 Chromosome LG14; [Apis mellifera] gi:110825763 chromosome 14 complete sequence	7.81e-27	--	--	--	--	--	--	--	M
SiJWA07ACG.scf	gnl|Amel|GB10598-PA	1e-35	--	--	--	--	--	--	--	--	--	M
SI.CL.6.cl.678.SiJWF06ACE.SP6.scf	gnl|Amel|GB18959-PA	2e-35	chr|NC_007073|NC_007073.2 Chromosome LG4; [Apis mellifera] gi:110825768 chromosome 4 complete sequence	5.48e-41	chr|AMe_AADG05001758|AMe_AADG05001758.1	Linkage group 4; [Apis mellifera] draft genome, Amel_4.0.	3e-36	--	--	--	--	M
SiJWF11BDS2.scf	gnl|Amel|GB15750-PA	2e-35	chr|NC_007070|NC_007070.2 Chromosome LG1; [Apis mellifera] gi:110825701 chromosome 1 complete sequence	1.46e-40	chr|AMe_AADG05006773|AMe_AADG05006773.1	Linkage group 1; [Apis mellifera] draft genome, Amel_4.0.	3e-12	--	--	--	--	M
SI.CL.22.cl.2257.Contig1	gnl|Amel|GB17730-PA	2e-35	chr|NC_007073|NC_007073.2 Chromosome LG4; [Apis mellifera] gi:110825768 chromosome 4 complete sequence	8.46e-39	--	--	--	--	--	--	--	M
SI.CL.23.cl.2321.Contig1	gnl|Amel|GB19845-PA	2e-35	chr|NC_007077|NC_007077.2 Chromosome LG8; [Apis mellifera] gi:110825772 chromosome 8 complete sequence	1.35e-37	chr|AMe_AADG05006819|AMe_AADG05006819.1	Linkage group 8; [Apis mellifera] draft genome, Amel_4.0.	4e-17	--	--	--	--	M
SI.CL.34.cl.3499.Contig1	gnl|Amel|GB19764-PA	2e-35	chr|NC_007072|NC_007072.2 Chromosome LG3; [Apis mellifera] gi:110825767 chromosome 3 complete sequence	4.28e-24	--	--	--	--	--	--	--	M
SiJWB12ACD.scf	gnl|Amel|GB18531-PA	2e-35	chr|NC_007085|NC_007085.2 Chromosome LG16; [Apis mellifera] gi:110825765 chromosome 16 complete sequence	1.16e-23	chr|AMe_AADG05010158|AMe_AADG05010158.1	Linkage group 16; [Apis mellifera] draft genome, Amel_4.0.	1e-20	--	--	--	--	M
SiJWD05ACV.scf	gnl|Amel|GB14189-PA	2e-35	--	--	chr|AMe_AADG05012241|AMe_AADG05012241.1	Linkage group Un; [Apis mellifera] draft genome, Amel_4.0.	1e-14	--	--	--	--	M
SI.CL.18.cl.1841.Contig1	gnl|Amel|GB12149-PA	3e-35	chr|NC_007081|NC_007081.2 Chromosome LG12; [Apis mellifera] gi:110825756 chromosome 12 complete sequence	1.69e-36	chr|AMe_AADG05004686|AMe_AADG05004686.1	Linkage group 12; [Apis mellifera] draft genome, Amel_4.0.	1e-14	--	--	--	--	M
SI.CL.27.cl.2786.Contig1	gnl|Amel|GB17330-PA	4e-35	chr|NC_007077|NC_007077.2 Chromosome LG8; [Apis mellifera] gi:110825772 chromosome 8 complete sequence	1.11e-37	--	--	--	ens|ENSAPMP00000000216	pep:known group:AMEL2.0:GroupUn:35099903:35100950:-1 gene:ENSAPMG00000000134 transcript:ENSAPMT00000000216	3e-40	6	M
SI.CL.13.cl.1348.Contig1	gnl|Amel|GB10905-PA	4e-35	chr|NC_007085|NC_007085.2 Chromosome LG16; [Apis mellifera] gi:110825765 chromosome 16 complete sequence	1.98e-29	--	--	--	ens|ENSAPMP00000034780	pep:novel group:AMEL2.0:GroupUn:265470783:265471970:1 gene:ENSAPMG00000014714 transcript:ENSAPMT00000034780	4e-33	2	M
SI.CL.37.cl.3714.Contig1	gnl|Amel|GB10695-PA	8e-35	chr|NC_007073|NC_007073.2 Chromosome LG4; [Apis mellifera] gi:110825768 chromosome 4 complete sequence	4.54e-14	--	--	--	ens|ENSAPMP00000018774	pep:novel group:AMEL2.0:GroupUn:216585317:216587739:-1 gene:ENSAPMG00000006659 transcript:ENSAPMT00000018771	1e-31	3	M
SiJWD04BBW.scf	gnl|Amel|GB17745-PA	8e-35	chr|NC_007077|NC_007077.2 Chromosome LG8; [Apis mellifera] gi:110825772 chromosome 8 complete sequence	1.38e-12	--	--	--	--	--	--	--	M
SiJWG09BBF.scf	gnl|Amel|GB11459-PA	1e-34	chr|NC_007070|NC_007070.2 Chromosome LG1; [Apis mellifera] gi:110825701 chromosome 1 complete sequence	1.48e-26	--	--	--	--	--	--	--	M
SI.CL.13.cl.1327.Contig1	gnl|Amel|GB10856-PA	2e-34	chr|NC_007077|NC_007077.2 Chromosome LG8; [Apis mellifera] gi:110825772 chromosome 8 complete sequence	5.61e-36	--	--	--	--	--	--	--	M
SI.CL.12.cl.1291.Contig2	gnl|Amel|GB16889-PA	2e-34	chr|NC_007076|NC_007076.2 Chromosome LG7; [Apis mellifera] gi:110825771 chromosome 7 complete sequence	1.9e-30	--	--	--	ens|ENSAPMP00000017234	pep:known group:AMEL2.0:Group7:7711843:7713917:-1 gene:ENSAPMG00000010197 transcript:ENSAPMT00000017234	7e-33	5	M
SI.CL.3.cl.304.Contig1	gnl|Amel|GB14261-PA	2e-34	chr|NC_007074|NC_007074.2 Chromosome LG5; [Apis mellifera] gi:110825769 chromosome 5 complete sequence	1.48e-24	--	--	--	ens|ENSAPMP00000005170	pep:novel group:AMEL2.0:Group5:6364094:6365041:1 gene:ENSAPMG00000002968 transcript:ENSAPMT00000005170	3e-14	12	M
SI.CL.14.cl.1417.Contig1	gnl|Amel|GB17694-PA	2e-34	chr|NC_007073|NC_007073.2 Chromosome LG4; [Apis mellifera] gi:110825768 chromosome 4 complete sequence	4.09e-19	chr|AMe_AADG05001759|AMe_AADG05001759.1	Linkage group 4; [Apis mellifera] draft genome, Amel_4.0.	2e-25	--	--	--	--	M
SI.CL.39.cl.3930.Contig1	gnl|Amel|GB19831-PA	2e-34	chr|NC_007070|NC_007070.2 Chromosome LG1; [Apis mellifera] gi:110825701 chromosome 1 complete sequence	5.05e-10	chr|AMe_AADG05016120|AMe_AADG05016120.1	Linkage group Un; [Apis mellifera] draft genome, Amel_4.0.	8e-15	ens|ENSAPMP00000023111	pep:novel group:AMEL2.0:Group1:9956287:9979906:1 gene:ENSAPMG00000001145 transcript:ENSAPMT00000023107	1e-14	13	M
SI.CL.29.cl.2993.Contig1	gnl|Amel|GB18275-PA	3e-34	chr|NC_007073|NC_007073.2 Chromosome LG4; [Apis mellifera] gi:110825768 chromosome 4 complete sequence	8.3e-14	--	--	--	ens|ENSAPMP00000019111	pep:novel group:AMEL2.0:GroupUn:30417764:30418674:1 gene:ENSAPMG00000011879 transcript:ENSAPMT00000019107	2e-21	3	M
SI.CL.5.cl.558.Contig1	gnl|Amel|GB11976-PA	4e-34	--	--	--	--	--	--	--	--	--	M
SI.CL.17.cl.1790.Contig1	gnl|Amel|GB17675-PA	6e-34	chr|NC_007074|NC_007074.2 Chromosome LG5; [Apis mellifera] gi:110825769 chromosome 5 complete sequence	2.12e-52	chr|AMe_AADG05001960|AMe_AADG05001960.1	Linkage group 5; [Apis mellifera] draft genome, Amel_4.0.	2e-21	--	--	--	--	M
SiJWC08BCH2.scf	gnl|Amel|GB15195-PA	8e-34	chr|NC_007072|NC_007072.2 Chromosome LG3; [Apis mellifera] gi:110825767 chromosome 3 complete sequence	2.08e-34	--	--	--	--	--	--	--	M
SI.CL.24.cl.2421.SiJWD01ADQ.scf	gnl|Amel|GB10032-PA	9e-34	chr|NC_007070|NC_007070.2 Chromosome LG1; [Apis mellifera] gi:110825701 chromosome 1 complete sequence	3.18e-34	chr|AMe_AADG05007028|AMe_AADG05007028.1	Linkage group 1; [Apis mellifera] draft genome, Amel_4.0.	1e-11	--	--	--	--	M
SiJWE11BDHR4G07.scf	gnl|Amel|GB17000-PA	1e-33	chr|NC_007071|NC_007071.2 Chromosome LG2; [Apis mellifera] gi:110825766 chromosome 2 complete sequence	1.52e-43	chr|AMe_AADG05001113|AMe_AADG05001113.1	Linkage group 2; [Apis mellifera] draft genome, Amel_4.0.	5e-69	ens|ENSAPMP00000007916	pep:novel group:AMEL2.0:Group2:13032158:13039507:-1 gene:ENSAPMG00000012191 transcript:ENSAPMT00000007916	9e-31	3	M
SiJWB04ADH.scf	gnl|Amel|GB15751-PA	1e-33	chr|NC_007071|NC_007071.2 Chromosome LG2; [Apis mellifera] gi:110825766 chromosome 2 complete sequence	6e-40	--	--	--	--	--	--	--	M
SI.CL.12.cl.1297.Contig1	gnl|Amel|GB14937-PA	1e-33	chr|NC_007070|NC_007070.2 Chromosome LG1; [Apis mellifera] gi:110825701 chromosome 1 complete sequence	1.03e-39	chr|AMe_AADG05000555|AMe_AADG05000555.1	Linkage group 1; [Apis mellifera] draft genome, Amel_4.0.	5e-11	--	--	--	--	M
SI.CL.26.cl.2662.Contig1	gnl|Amel|GB14894-PA	1e-33	chr|NC_007073|NC_007073.2 Chromosome LG4; [Apis mellifera] gi:110825768 chromosome 4 complete sequence	3.71e-35	--	--	--	ens|ENSAPMP00000010774	pep:known group:AMEL2.0:GroupUn:30406098:30407389:-1 gene:ENSAPMG00000006231 transcript:ENSAPMT00000010774	3e-32	6	M
SiJWF06ACQ.scf	gnl|Amel|GB19949-PA	2e-33	chr|NC_007072|NC_007072.2 Chromosome LG3; [Apis mellifera] gi:110825767 chromosome 3 complete sequence	6.11e-34	--	--	--	--	--	--	--	M
SI.CL.16.cl.1667.Contig1	gnl|Amel|GB17281-PA	2e-33	chr|NC_007084|NC_007084.2 Chromosome LG15; [Apis mellifera] gi:110825764 chromosome 15 complete sequence	7.54e-34	chr|AMe_AADG05005228|AMe_AADG05005228.1	Linkage group 15; [Apis mellifera] draft genome, Amel_4.0.	2e-16	ens|ENSAPMP00000024815	pep:novel group:AMEL2.0:Group15:244637:245213:1 gene:ENSAPMG00000013711 transcript:ENSAPMT00000024813	2e-25	2	M
SI.CL.30.cl.3034.Contig1	gnl|Amel|GB10216-PA	2e-33	chr|NC_007080|NC_007080.2 Chromosome LG11; [Apis mellifera] gi:110825732 chromosome 11 complete sequence	2.19e-33	chr|AMe_AADG05004221|AMe_AADG05004221.1	Linkage group 11; [Apis mellifera] draft genome, Amel_4.0.	6e-06	ens|ENSAPMP00000020880	pep:novel group:AMEL2.0:Group11:3580606:3582170:1 gene:ENSAPMG00000015107 transcript:ENSAPMT00000020874	2e-31	5	M
SI.CL.4.cl.443.Contig1	gnl|Amel|GB18819-PA	2e-33	chr|NC_007074|NC_007074.2 Chromosome LG5; [Apis mellifera] gi:110825769 chromosome 5 complete sequence	1.26e-17	--	--	--	--	--	--	--	M
SI.CL.4.cl.486.Contig1	gnl|Amel|GB17021-PA	3e-33	chr|NC_007070|NC_007070.2 Chromosome LG1; [Apis mellifera] gi:110825701 chromosome 1 complete sequence	2e-22	--	--	--	--	--	--	--	M
SI.CL.8.cl.829.Contig1	gnl|Amel|GB10284-PA	4e-33	chr|NC_007074|NC_007074.2 Chromosome LG5; [Apis mellifera] gi:110825769 chromosome 5 complete sequence	1.06e-31	--	--	--	ens|ENSAPMP00000000721	pep:known group:AMEL2.0:Group5:13143587:13144439:1 gene:ENSAPMG00000000447 transcript:ENSAPMT00000000721	5e-31	6	M
SI.CL.30.cl.3039.Contig1	gnl|Amel|GB11733-PA	4e-33	chr|NC_007070|NC_007070.2 Chromosome LG1; [Apis mellifera] gi:110825701 chromosome 1 complete sequence	6.96e-31	chr|AMe_AADG05005730|AMe_AADG05005730.1	Linkage group 1; [Apis mellifera] draft genome, Amel_4.0.	2e-12	--	--	--	--	M
SI.CL.24.cl.2495.Contig1	gnl|Amel|GB16730-PA	5e-33	chr|NC_007078|NC_007078.2 Chromosome LG9; [Apis mellifera] gi:110825774 chromosome 9 complete sequence	1e-15	--	--	--	--	--	--	--	M
SI.CL.21.cl.2197.Contig1	gnl|Amel|GB18598-PA	6e-33	chr|NC_007071|NC_007071.2 Chromosome LG2; [Apis mellifera] gi:110825766 chromosome 2 complete sequence	3.82e-28	--	--	--	ens|ENSAPMP00000007659	pep:known group:AMEL2.0:Group2:6068216:6069282:1 gene:ENSAPMG00000004433 transcript:ENSAPMT00000007659	5e-20	2	M
SiJWA08ACO.scf	gnl|Amel|GB11462-PA	7e-33	chr|NC_007076|NC_007076.2 Chromosome LG7; [Apis mellifera] gi:110825771 chromosome 7 complete sequence	1.95e-38	chr|AMe_AADG05006885|AMe_AADG05006885.1	Linkage group 7; [Apis mellifera] draft genome, Amel_4.0.	7e-19	--	--	--	--	M
SI.CL.27.cl.2754.Contig1	gnl|Amel|GB12047-PA	9e-33	--	--	--	--	--	ens|ENSAPMP00000031656	pep:novel group:AMEL2.0:GroupUn:38422076:38427480:-1 gene:ENSAPMG00000012550 transcript:ENSAPMT00000031655	2e-31	4	M
SiJWG07ADM.scf	gnl|Amel|GB17966-PA	1e-32	chr|NC_007075|NC_007075.2 Chromosome LG6; [Apis mellifera] gi:110825770 chromosome 6 complete sequence	3.11e-22	chr|AMe_AADG05002633|AMe_AADG05002633.1	Linkage group 6; [Apis mellifera] draft genome, Amel_4.0.	3e-15	--	--	--	--	M
SiJWF12ABU.scf	gnl|Amel|GB16118-PA	1e-32	chr|NC_007076|NC_007076.2 Chromosome LG7; [Apis mellifera] gi:110825771 chromosome 7 complete sequence	2.73e-10	chr|AMe_AADG05006503|AMe_AADG05006503.1	Linkage group Un; [Apis mellifera] draft genome, Amel_4.0.	9e-06	--	--	--	--	M
SiJWH03ACJ.scf	gnl|Amel|GB10738-PA	1e-32	chr|NC_007072|NC_007072.2 Chromosome LG3; [Apis mellifera] gi:110825767 chromosome 3 complete sequence	2.84e-10	--	--	--	--	--	--	--	M
SI.CL.4.cl.408.Contig1	gnl|Amel|GB10428-PA	2e-32	chr|NC_007071|NC_007071.2 Chromosome LG2; [Apis mellifera] gi:110825766 chromosome 2 complete sequence	5.97e-38	--	--	--	--	--	--	--	M
SiJWB09CAI2.scf	gnl|Amel|GB10949-PA	2e-32	chr|NC_007079|NC_007079.2 Chromosome LG10; [Apis mellifera] gi:110825711 chromosome 10 complete sequence	1.13e-27	--	--	--	--	--	--	--	M
SI.CL.13.cl.1302.Contig1	gnl|Amel|GB12164-PA	2e-32	--	--	--	--	--	--	--	--	--	M
SI.CL.26.cl.2647.Contig1	gnl|Amel|GB19952-PA	3e-32	chr|NC_007073|NC_007073.2 Chromosome LG4; [Apis mellifera] gi:110825768 chromosome 4 complete sequence	1.68e-17	chr|AMe_AADG05008285|AMe_AADG05008285.1	Linkage group Un; [Apis mellifera] draft genome, Amel_4.0.	9e-06	--	--	--	--	M
SI.CL.5.cl.542.Contig1	gnl|Amel|GB10888-PA	3e-32	--	--	chr|AMe_AADG05007983|AMe_AADG05007983.1	Linkage group Un; [Apis mellifera] draft genome, Amel_4.0.	1e-05	ens|ENSAPMP00000035636	pep:novel group:AMEL2.0:GroupUn:42182281:42185642:-1 gene:ENSAPMG00000011317 transcript:ENSAPMT00000035636	1e-30	6	M
SiJWE05BAP.scf	gnl|Amel|GB12147-PA	4e-32	chr|NC_007083|NC_007083.2 Chromosome LG14; [Apis mellifera] gi:110825763 chromosome 14 complete sequence	3.66e-57	--	--	--	--	--	--	--	M
SI.CL.10.cl.1075.Contig1	gnl|Amel|GB16295-PA	4e-32	chr|NC_007072|NC_007072.2 Chromosome LG3; [Apis mellifera] gi:110825767 chromosome 3 complete sequence	1.69e-32	--	--	--	--	--	--	--	M
SI.CL.37.cl.3792.Contig1	gnl|Amel|GB17680-PA	4e-32	--	--	chr|AMe_AADG05016120|AMe_AADG05016120.1	Linkage group Un; [Apis mellifera] draft genome, Amel_4.0.	3e-98	--	--	--	--	M
SiJWE06ACA.scf	gnl|Amel|GB20104-PA	5e-32	chr|NC_007070|NC_007070.2 Chromosome LG1; [Apis mellifera] gi:110825701 chromosome 1 complete sequence	2.11e-37	chr|AMe_AADG05000453|AMe_AADG05000453.1	Linkage group 1; [Apis mellifera] draft genome, Amel_4.0.	9e-18	--	--	--	--	M
SiJWH10BDR.scf	gnl|Amel|GB13067-PA	5e-32	chr|NC_007070|NC_007070.2 Chromosome LG1; [Apis mellifera] gi:110825701 chromosome 1 complete sequence	4.65e-07	chr|AMe_AADG05012395|AMe_AADG05012395.1	Linkage group Un; [Apis mellifera] draft genome, Amel_4.0.	4e-11	--	--	--	--	M
SiJWG05BBI.scf	gnl|Amel|GB17887-PA	8e-32	chr|NC_007074|NC_007074.2 Chromosome LG5; [Apis mellifera] gi:110825769 chromosome 5 complete sequence	3.05e-22	--	--	--	--	--	--	--	M
SI.CL.13.cl.1312.Contig1	gnl|Amel|GB17377-PA	1e-31	chr|NC_007071|NC_007071.2 Chromosome LG2; [Apis mellifera] gi:110825766 chromosome 2 complete sequence	6.69e-32	--	--	--	ens|ENSAPMP00000014711	pep:novel group:AMEL2.0:Group2:6802131:6802946:-1 gene:ENSAPMG00000008387 transcript:ENSAPMT00000014711	6e-38	3	M
SiJWF04BBK.scf	gnl|Amel|GB12629-PA	2e-31	chr|NC_007083|NC_007083.2 Chromosome LG14; [Apis mellifera] gi:110825763 chromosome 14 complete sequence	6.49e-31	--	--	--	--	--	--	--	M
SI.CL.37.cl.3799.Contig1	gnl|Amel|GB11770-PA	2e-31	chr|NC_007075|NC_007075.2 Chromosome LG6; [Apis mellifera] gi:110825770 chromosome 6 complete sequence	2.39e-30	chr|AMe_AADG05002414|AMe_AADG05002414.1	Linkage group 6; [Apis mellifera] draft genome, Amel_4.0.	2e-16	--	--	--	--	M
SiJWB07BDB2.scf	gnl|Amel|GB13722-PA	2e-31	chr|NC_007075|NC_007075.2 Chromosome LG6; [Apis mellifera] gi:110825770 chromosome 6 complete sequence	3.78e-22	--	--	--	ens|ENSAPMP00000018467	pep:known group:AMEL2.0:Group6:12899041:12901894:1 gene:ENSAPMG00000002351 transcript:ENSAPMT00000018464	3e-29	5	M
SI.CL.21.cl.2125.Contig1	gnl|Amel|GB18417-PA	2e-31	--	--	--	--	--	ens|ENSAPMP00000002947	pep:known group:AMEL2.0:GroupUn:56035675:56036974:1 gene:ENSAPMG00000001719 transcript:ENSAPMT00000002947	2e-29	8	M
SI.CL.6.cl.663.Contig2	gnl|Amel|GB12732-PA	4e-31	chr|NC_007070|NC_007070.2 Chromosome LG1; [Apis mellifera] gi:110825701 chromosome 1 complete sequence	1.05e-64	chr|AMe_AADG05000504|AMe_AADG05000504.1	Linkage group 1; [Apis mellifera] draft genome, Amel_4.0.	3e-40	--	--	--	--	M
SI.CL.41.cl.4111.Contig1	gnl|Amel|GB10537-PA	4e-31	chr|NC_007080|NC_007080.2 Chromosome LG11; [Apis mellifera] gi:110825732 chromosome 11 complete sequence	1.33e-26	--	--	--	--	--	--	--	M
SI.CL.5.cl.575.SiJWB10ABF.scf	gnl|Amel|GB11863-PA	4e-31	chr|NC_007084|NC_007084.2 Chromosome LG15; [Apis mellifera] gi:110825764 chromosome 15 complete sequence	8.94e-20	chr|AMe_AADG05005239|AMe_AADG05005239.1	Linkage group 15; [Apis mellifera] draft genome, Amel_4.0.	8e-06	ens|ENSAPMP00000009909	pep:known group:AMEL2.0:Group15:422485:423323:1 gene:ENSAPMG00000005720 transcript:ENSAPMT00000009909	3e-18	5	M
SI.CL.24.cl.2479.Contig1	gnl|Amel|GB19068-PA	4e-31	--	--	--	--	--	--	--	--	--	M
SiJWF01AAH.scf	gnl|Amel|GB17607-PA	5e-31	chr|NC_007074|NC_007074.2 Chromosome LG5; [Apis mellifera] gi:110825769 chromosome 5 complete sequence	7.66e-30	--	--	--	--	--	--	--	M
SiJWH09BDE2.scf	gnl|Amel|GB13121-PA	9e-31	chr|NC_007084|NC_007084.2 Chromosome LG15; [Apis mellifera] gi:110825764 chromosome 15 complete sequence	2.7e-28	--	--	--	ens|ENSAPMP00000026487	pep:novel group:AMEL2.0:Group12:709766:716130:-1 gene:ENSAPMG00000010274 transcript:ENSAPMT00000026488	3e-13	2	M
SI.CL.37.cl.3711.Contig1	gnl|Amel|GB11305-PA	9e-31	--	--	--	--	--	--	--	--	--	M
SI.CL.5.cl.508.SiJWF09ABJ.scf	gnl|Amel|GB14446-PA	1e-30	chr|NC_007080|NC_007080.2 Chromosome LG11; [Apis mellifera] gi:110825732 chromosome 11 complete sequence	1.66e-48	--	--	--	ens|ENSAPMP00000016253	pep:known group:AMEL2.0:Group11:2153436:2159860:1 gene:ENSAPMG00000009294 transcript:ENSAPMT00000016253	1e-28	6	M
SI.CL.30.cl.3036.Contig1	gnl|Amel|GB18886-PA	1e-30	--	--	--	--	--	--	--	--	--	M
SI.CL.17.cl.1713.Contig1	gnl|Amel|GB20065-PA	2e-30	chr|NC_007082|NC_007082.2 Chromosome LG13; [Apis mellifera] gi:110825762 chromosome 13 complete sequence	1.29e-33	chr|AMe_AADG05004837|AMe_AADG05004837.1	Linkage group 13; [Apis mellifera] draft genome, Amel_4.0.	2e-09	--	--	--	--	M
SiJWF02ABT.scf	gnl|Amel|GB19986-PA	2e-30	chr|NC_007070|NC_007070.2 Chromosome LG1; [Apis mellifera] gi:110825701 chromosome 1 complete sequence	1.52e-31	--	--	--	--	--	--	--	M
SI.CL.41.cl.4186.Contig1	gnl|Amel|GB14456-PA	2e-30	chr|NC_007076|NC_007076.2 Chromosome LG7; [Apis mellifera] gi:110825771 chromosome 7 complete sequence	3.25e-13	--	--	--	--	--	--	--	M
SI.CL.26.cl.2644.Contig1	gnl|Amel|GB15236-PA	2e-30	--	--	chr|AMe_AADG05007568|AMe_AADG05007568.1	Linkage group Un; [Apis mellifera] draft genome, Amel_4.0.	3e-15	--	--	--	--	M
SI.CL.2.cl.209.Contig1	gnl|Amel|GB10428-PA	3e-30	chr|NC_007071|NC_007071.2 Chromosome LG2; [Apis mellifera] gi:110825766 chromosome 2 complete sequence	1.67e-35	--	--	--	--	--	--	--	M
SiJWD10BBW.scf	gnl|Amel|GB11735-PA	3e-30	chr|NC_007074|NC_007074.2 Chromosome LG5; [Apis mellifera] gi:110825769 chromosome 5 complete sequence	2.96e-32	--	--	--	ens|ENSAPMP00000004528	pep:known group:AMEL2.0:Group13:3643661:3647930:1 gene:ENSAPMG00000002584 transcript:ENSAPMT00000004528	2e-19	11	M
SI.CL.20.cl.2040.Contig1	gnl|Amel|GB15287-PA	3e-30	chr|NC_007076|NC_007076.2 Chromosome LG7; [Apis mellifera] gi:110825771 chromosome 7 complete sequence	1.08e-06	--	--	--	--	--	--	--	M
SiJWH12AAL.scf	gnl|Amel|GB15622-PA	4e-30	chr|NC_007077|NC_007077.2 Chromosome LG8; [Apis mellifera] gi:110825772 chromosome 8 complete sequence	1.39e-36	--	--	--	ens|ENSAPMP00000034784	pep:novel group:AMEL2.0:GroupUn:30630271:30630899:-1 gene:ENSAPMG00000013835 transcript:ENSAPMT00000034784	1e-17	13	M
SiJWH12BBC2.scf	gnl|Amel|GB15634-PA	4e-30	chr|NC_007076|NC_007076.2 Chromosome LG7; [Apis mellifera] gi:110825771 chromosome 7 complete sequence	5.92e-26	--	--	--	ens|ENSAPMP00000034452	pep:novel group:AMEL2.0:Group9:4914338:4936127:1 gene:ENSAPMG00000011313 transcript:ENSAPMT00000034452	4e-26	6	M
SiJWH05ABW.scf	gnl|Amel|GB10314-PA	5e-30	chr|NC_007084|NC_007084.2 Chromosome LG15; [Apis mellifera] gi:110825764 chromosome 15 complete sequence	1.1e-34	--	--	--	--	--	--	--	M
SI.CL.40.cl.4078.Contig1	gnl|Amel|GB14541-PA	5e-30	chr|NC_007076|NC_007076.2 Chromosome LG7; [Apis mellifera] gi:110825771 chromosome 7 complete sequence	9.16e-28	chr|AMe_AADG05002695|AMe_AADG05002695.1	Linkage group 7; [Apis mellifera] draft genome, Amel_4.0.	1e-05	--	--	--	--	M
SI.CL.3.cl.365.Contig1	gnl|Amel|GB15438-PA	5e-30	--	--	--	--	--	--	--	--	--	M
SiJWA01ADT.scf	gnl|Amel|GB19080-PA	6e-30	chr|NC_007085|NC_007085.2 Chromosome LG16; [Apis mellifera] gi:110825765 chromosome 16 complete sequence	6.96e-21	--	--	--	--	--	--	--	M
SiJWA08CAP.scf	gnl|Amel|GB16844-PA	7e-30	chr|NC_007081|NC_007081.2 Chromosome LG12; [Apis mellifera] gi:110825756 chromosome 12 complete sequence	2.88e-34	chr|AMe_AADG05002189|AMe_AADG05002189.1	Linkage group 5; [Apis mellifera] draft genome, Amel_4.0.	2e-41	tr|O61334|O61334_APIME	Elongation factor-1alpha F2.[Apis mellifera]	5e-27	3	M
SI.CL.35.cl.3583.Contig1	gnl|Amel|GB15552-PA	7e-30	chr|NC_007080|NC_007080.2 Chromosome LG11; [Apis mellifera] gi:110825732 chromosome 11 complete sequence	2.42e-09	--	--	--	--	--	--	--	M
SiJWA07BBU.scf	gnl|Amel|GB13280-PA	8e-30	chr|NC_007077|NC_007077.2 Chromosome LG8; [Apis mellifera] gi:110825772 chromosome 8 complete sequence	4.4e-30	--	--	--	--	--	--	--	M
SiJWH12ADI.scf	gnl|Amel|GB17639-PA	9e-30	chr|NC_007080|NC_007080.2 Chromosome LG11; [Apis mellifera] gi:110825732 chromosome 11 complete sequence	5.61e-30	chr|AMe_AADG05006374|AMe_AADG05006374.1	Linkage group 11; [Apis mellifera] draft genome, Amel_4.0.	6e-07	ens|ENSAPMP00000014272	pep:novel group:AMEL2.0:GroupUn:11613777:11615308:-1 gene:ENSAPMG00000008149 transcript:ENSAPMT00000014272	2e-17	2	M
SI.CL.28.cl.2807.Contig1	gnl|Amel|GB16137-PA	1e-29	--	--	chr|AMe_AADG05014178|AMe_AADG05014178.1	Linkage group Un; [Apis mellifera] draft genome, Amel_4.0.	1e-05	--	--	--	--	M
SiJWB06ADH.scf	gnl|Amel|GB15834-PA	2e-29	chr|NC_007072|NC_007072.2 Chromosome LG3; [Apis mellifera] gi:110825767 chromosome 3 complete sequence	1.23e-25	--	--	--	ens|ENSAPMP00000027642	pep:novel group:AMEL2.0:GroupUn:16583229:16584194:1 gene:ENSAPMG00000016317 transcript:ENSAPMT00000027640	7e-39	6	M
SI.CL.28.cl.2809.Contig1	gnl|Amel|GB10537-PA	2e-29	chr|NC_007080|NC_007080.2 Chromosome LG11; [Apis mellifera] gi:110825732 chromosome 11 complete sequence	4.39e-11	--	--	--	--	--	--	--	M
SiJWD11AAT.scf	gnl|Amel|GB19085-PA	2e-29	chr|NC_007082|NC_007082.2 Chromosome LG13; [Apis mellifera] gi:110825762 chromosome 13 complete sequence	4.24e-10	--	--	--	ens|ENSAPMP00000004529	pep:novel group:AMEL2.0:Group13:3643763:3647836:1 gene:ENSAPMG00000002584 transcript:ENSAPMT00000004529	2e-27	4	M
SiJWG12BCL2.scf	gnl|Amel|GB10965-PA	4e-29	chr|NC_007073|NC_007073.2 Chromosome LG4; [Apis mellifera] gi:110825768 chromosome 4 complete sequence	8.56e-34	chr|AMe_AADG05001675|AMe_AADG05001675.1	Linkage group 4; [Apis mellifera] draft genome, Amel_4.0.	2e-31	--	--	--	--	M
SI.CL.5.cl.523.Contig1	gnl|Amel|GB18045-PA	4e-29	chr|NC_007084|NC_007084.2 Chromosome LG15; [Apis mellifera] gi:110825764 chromosome 15 complete sequence	3.77e-07	chr|AMe_AADG05007185|AMe_AADG05007185.1	Linkage group Un; [Apis mellifera] draft genome, Amel_4.0.	9e-06	--	--	--	--	M
SI.CL.19.cl.1999.SiJWC01BCU2.scf	gnl|Amel|GB17043-PA	7e-29	chr|NC_007083|NC_007083.2 Chromosome LG14; [Apis mellifera] gi:110825763 chromosome 14 complete sequence	4.73e-19	--	--	--	--	--	--	--	M
SiJWB03ACK.scf	gnl|Amel|GB12906-PA	1e-28	chr|NC_007079|NC_007079.2 Chromosome LG10; [Apis mellifera] gi:110825711 chromosome 10 complete sequence	6.5e-33	chr|AMe_AADG05003807|AMe_AADG05003807.1	Linkage group 10; [Apis mellifera] draft genome, Amel_4.0.	1e-38	ens|ENSAPMP00000011624	pep:novel group:AMEL2.0:GroupUn:3265536:3267065:-1 gene:ENSAPMG00000006681 transcript:ENSAPMT00000011624	1e-25	5	M
SI.CL.17.cl.1777.Contig1	gnl|Amel|GB11489-PA	1e-28	chr|NC_007077|NC_007077.2 Chromosome LG8; [Apis mellifera] gi:110825772 chromosome 8 complete sequence	6.63e-29	--	--	--	ens|ENSAPMP00000001586	pep:novel group:AMEL2.0:GroupUn:28016024:28016753:-1 gene:ENSAPMG00000000943 transcript:ENSAPMT00000001586	4e-19	6	M
SiJWB08AEA.scf	gnl|Amel|GB18518-PA	1e-28	chr|NC_007078|NC_007078.2 Chromosome LG9; [Apis mellifera] gi:110825774 chromosome 9 complete sequence	3.1e-12	--	--	--	tr|Q6QHT2|Q6QHT2_APIME	Neuronal nicotinic acetylcholine receptor Apisa2 subunit.[Apis mellifera]	2e-26	11	M
SI.CL.1.cl.160.Contig1	gnl|Amel|GB12985-PA	1e-28	--	--	chr|AMe_AADG05013382|AMe_AADG05013382.1	Linkage group Un; [Apis mellifera] draft genome, Amel_4.0.	2e-10	--	--	--	--	M
SiJWG09BCA2.scf	gnl|Amel|GB17446-PA	2e-28	chr|NC_007070|NC_007070.2 Chromosome LG1; [Apis mellifera] gi:110825701 chromosome 1 complete sequence	3.84e-32	--	--	--	ens|ENSAPMP00000012875	pep:known group:AMEL2.0:Group1:6008605:6011041:1 gene:ENSAPMG00000007369 transcript:ENSAPMT00000012875	2e-25	4	M
SI.CL.19.cl.1996.Contig1	gnl|Amel|GB16453-PA	2e-28	chr|NC_007072|NC_007072.2 Chromosome LG3; [Apis mellifera] gi:110825767 chromosome 3 complete sequence	4.41e-29	--	--	--	ens|ENSAPMP00000017182	pep:novel group:AMEL2.0:GroupUn:15972552:15976940:1 gene:ENSAPMG00000015741 transcript:ENSAPMT00000017182	2e-07	12	M
SiJWB09AAZ.scf	gnl|Amel|GB15383-PA	4e-28	--	--	--	--	--	--	--	--	--	M
SI.CL.17.cl.1741.Contig2	gnl|Amel|GB15754-PA	5e-28	chr|NC_007075|NC_007075.2 Chromosome LG6; [Apis mellifera] gi:110825770 chromosome 6 complete sequence	6.68e-34	--	--	--	ens|ENSAPMP00000006400	pep:known group:AMEL2.0:Group6:2861425:2862965:-1 gene:ENSAPMG00000003658 transcript:ENSAPMT00000006400	2e-14	18	M
SI.CL.23.cl.2365.Contig1	gnl|Amel|GB18221-PA	6e-28	chr|NC_007070|NC_007070.2 Chromosome LG1; [Apis mellifera] gi:110825701 chromosome 1 complete sequence	1.04e-38	chr|AMe_AADG05014446|AMe_AADG05014446.1	Linkage group Un; [Apis mellifera] draft genome, Amel_4.0.	5e-19	--	--	--	--	M
SI.CL.0.cl.043.Contig1	gnl|Amel|GB19891-PA	6e-28	chr|NC_007075|NC_007075.2 Chromosome LG6; [Apis mellifera] gi:110825770 chromosome 6 complete sequence	8.05e-29	--	--	--	ens|ENSAPMP00000032752	pep:novel group:AMEL2.0:Group6:4289167:4292095:-1 gene:ENSAPMG00000005485 transcript:ENSAPMT00000032753	8e-26	3	M
SI.CL.17.cl.1714.Contig1	gnl|Amel|GB20047-PA	8e-28	chr|NC_007073|NC_007073.2 Chromosome LG4; [Apis mellifera] gi:110825768 chromosome 4 complete sequence	1.9e-20	chr|AMe_AADG05008551|AMe_AADG05008551.1	Linkage group Un; [Apis mellifera] draft genome, Amel_4.0.	4e-11	--	--	--	--	M
SiJWC05BCW2.scf	gnl|Amel|GB17845-PA	9e-28	chr|NC_007072|NC_007072.2 Chromosome LG3; [Apis mellifera] gi:110825767 chromosome 3 complete sequence	2.72e-32	--	--	--	--	--	--	--	M
SiJWG06ACD.scf	gnl|Amel|GB12162-PA	1e-27	chr|NC_007070|NC_007070.2 Chromosome LG1; [Apis mellifera] gi:110825701 chromosome 1 complete sequence	3.86e-37	--	--	--	--	--	--	--	M
SI.CL.17.cl.1741.Contig1	gnl|Amel|GB15754-PA	1e-27	chr|NC_007075|NC_007075.2 Chromosome LG6; [Apis mellifera] gi:110825770 chromosome 6 complete sequence	7.43e-36	--	--	--	--	--	--	--	M
SI.CL.9.cl.988.Contig1	gnl|Amel|GB11150-PA	1e-27	chr|NC_007079|NC_007079.2 Chromosome LG10; [Apis mellifera] gi:110825711 chromosome 10 complete sequence	9.5e-20	--	--	--	ens|ENSAPMP00000017976	pep:novel group:AMEL2.0:GroupUn:16763371:16764203:1 gene:ENSAPMG00000013213 transcript:ENSAPMT00000017975	1e-25	10	M
SiJWE08AAU.scf	gnl|Amel|GB14456-PA	1e-27	chr|NC_007076|NC_007076.2 Chromosome LG7; [Apis mellifera] gi:110825771 chromosome 7 complete sequence	9.15e-11	--	--	--	--	--	--	--	M
SiJWB05BCU2.scf	gnl|Amel|GB18080-PA	2e-27	chr|NC_007079|NC_007079.2 Chromosome LG10; [Apis mellifera] gi:110825711 chromosome 10 complete sequence	2.11e-24	--	--	--	--	--	--	--	M
SI.CL.42.cl.4205.Contig1	gnl|Amel|GB11272-PA	2e-27	--	--	chr|AMe_AADG05006536|AMe_AADG05006536.1	Linkage group Un; [Apis mellifera] draft genome, Amel_4.0.	3e-14	--	--	--	--	M
SI.CL.16.cl.1676.Contig1	gnl|Amel|GB15172-PA	2e-27	--	--	--	--	--	ens|ENSAPMP00000029377	pep:novel group:AMEL2.0:GroupUn:43918170:43920369:1 gene:ENSAPMG00000012843 transcript:ENSAPMT00000029378	2e-25	6	M
SI.CL.21.cl.2145.Contig1	gnl|Amel|GB16751-PA	2e-27	--	--	--	--	--	ens|ENSAPMP00000031730	pep:novel group:AMEL2.0:GroupUn:317410139:317410898:1 gene:ENSAPMG00000012685 transcript:ENSAPMT00000031729	1e-25	4	M
SI.CL.26.cl.2649.Contig1	gnl|Amel|GB14354-PA	4e-27	chr|NC_007073|NC_007073.2 Chromosome LG4; [Apis mellifera] gi:110825768 chromosome 4 complete sequence	7.93e-33	--	--	--	--	--	--	--	M
SI.CL.4.cl.488.Contig1	gnl|Amel|GB17244-PA	4e-27	chr|NC_007074|NC_007074.2 Chromosome LG5; [Apis mellifera] gi:110825769 chromosome 5 complete sequence	9.3e-33	--	--	--	--	--	--	--	M
SiJWE07BBX.scf	gnl|Amel|GB14750-PA	4e-27	chr|NC_007070|NC_007070.2 Chromosome LG1; [Apis mellifera] gi:110825701 chromosome 1 complete sequence	3.52e-16	--	--	--	ens|ENSAPMP00000017796	pep:novel group:AMEL2.0:GroupUn:3467787:3468433:1 gene:ENSAPMG00000013932 transcript:ENSAPMT00000017795	4e-15	16	M
SI.CL.26.cl.2640.Contig1	gnl|Amel|GB11627-PA	5e-27	chr|NC_007077|NC_007077.2 Chromosome LG8; [Apis mellifera] gi:110825772 chromosome 8 complete sequence	1.3e-41	--	--	--	ens|ENSAPMP00000025109	pep:known group:AMEL2.0:Group8:5452749:5454791:1 gene:ENSAPMG00000011986 transcript:ENSAPMT00000025108	1e-11	18	M
SI.CL.20.cl.2043.Contig1	gnl|Amel|GB18321-PA	6e-27	chr|NC_007081|NC_007081.2 Chromosome LG12; [Apis mellifera] gi:110825756 chromosome 12 complete sequence	3.02e-32	--	--	--	--	--	--	--	M
SiJWF01BDN2.scf	gnl|Amel|GB11895-PA	6e-27	chr|NC_007074|NC_007074.2 Chromosome LG5; [Apis mellifera] gi:110825769 chromosome 5 complete sequence	1.69e-18	--	--	--	ens|ENSAPMP00000019106	pep:novel group:AMEL2.0:Group5:13241398:13243043:-1 gene:ENSAPMG00000009000 transcript:ENSAPMT00000019102	4e-24	12	M
SI.CL.12.cl.1258.Contig1	gnl|Amel|GB16129-PA	6e-27	chr|NC_007085|NC_007085.2 Chromosome LG16; [Apis mellifera] gi:110825765 chromosome 16 complete sequence	3.51e-17	--	--	--	ens|ENSAPMP00000001473	pep:known group:AMEL2.0:GroupUn:26248079:26248736:-1 gene:ENSAPMG00000000875 transcript:ENSAPMT00000001473	7e-25	4	M
SI.CL.31.cl.3133.Contig1	gnl|Amel|GB18846-PA	8e-27	chr|NC_007074|NC_007074.2 Chromosome LG5; [Apis mellifera] gi:110825769 chromosome 5 complete sequence	2.63e-31	--	--	--	--	--	--	--	M
SI.CL.18.cl.1813.Contig1	gnl|Amel|GB16974-PA	1e-26	chr|NC_007075|NC_007075.2 Chromosome LG6; [Apis mellifera] gi:110825770 chromosome 6 complete sequence	1.78e-25	--	--	--	--	--	--	--	M
SI.CL.16.cl.1672.Contig1	gnl|Amel|GB14262-PA	1e-26	--	--	--	--	--	--	--	--	--	M
SiJWE10CAF2.scf	gnl|Amel|GB15668-PA	2e-26	chr|NC_007074|NC_007074.2 Chromosome LG5; [Apis mellifera] gi:110825769 chromosome 5 complete sequence	8.67e-22	chr|AMe_AADG05002051|AMe_AADG05002051.1	Linkage group 5; [Apis mellifera] draft genome, Amel_4.0.	1e-05	--	--	--	--	M
SI.CL.12.cl.1264.Contig1	gnl|Amel|GB18819-PA	2e-26	chr|NC_007074|NC_007074.2 Chromosome LG5; [Apis mellifera] gi:110825769 chromosome 5 complete sequence	2.24e-13	--	--	--	tr|Q8I6X7|Q8I6X7_APIME	(ASP3c)Antennal-specific protein 3c precursor.[Apis mellifera]	2e-24	6	M
SiJWA12BBU.scf	gnl|Amel|GB13858-PA	3e-26	--	--	--	--	--	--	--	--	--	M
SI.CL.5.cl.578.Contig2	gnl|Amel|GB14463-PA	4e-26	chr|NC_007084|NC_007084.2 Chromosome LG15; [Apis mellifera] gi:110825764 chromosome 15 complete sequence	4.12e-30	--	--	--	--	--	--	--	M
SI.CL.25.cl.2501.Contig1	gnl|Amel|GB17201-PA	4e-26	chr|NC_007080|NC_007080.2 Chromosome LG11; [Apis mellifera] gi:110825732 chromosome 11 complete sequence	1.3e-28	--	--	--	--	--	--	--	M
SiJWD03BDV2.scf	gnl|Amel|GB16953-PA	4e-26	--	--	chr|AMe_AADG05008348|AMe_AADG05008348.1	Linkage group Un; [Apis mellifera] draft genome, Amel_4.0.	8e-22	--	--	--	--	M
SiJWA02CAI2.scf	gnl|Amel|GB15889-PA	5e-26	chr|NC_007079|NC_007079.2 Chromosome LG10; [Apis mellifera] gi:110825711 chromosome 10 complete sequence	1.82e-40	--	--	--	--	--	--	--	M
SiJWC02BDY.scf	gnl|Amel|GB17021-PA	5e-26	chr|NC_007076|NC_007076.2 Chromosome LG7; [Apis mellifera] gi:110825771 chromosome 7 complete sequence	7.31e-28	--	--	--	tr|Q8I8E9|Q8I8E9_APIME	Ammar1 transposase.[Apis mellifera]	4e-31	15	M
SiJWH09ADZ.scf	gnl|Amel|GB15688-PA	5e-26	chr|NC_007079|NC_007079.2 Chromosome LG10; [Apis mellifera] gi:110825711 chromosome 10 complete sequence	7.67e-27	--	--	--	--	--	--	--	M
SI.CL.37.cl.3751.Contig1	gnl|Amel|GB17872-PA	5e-26	--	--	chr|AMe_AADG05009658|AMe_AADG05009658.1	Linkage group Un; [Apis mellifera] draft genome, Amel_4.0.	7e-17	--	--	--	--	M
SI.CL.31.cl.3180.SiJWD04BBU.scf	gnl|Amel|GB18879-PA	6e-26	--	--	--	--	--	--	--	--	--	M
SI.CL.27.cl.2747.Contig1	gnl|Amel|GB19908-PA	8e-26	chr|NC_007077|NC_007077.2 Chromosome LG8; [Apis mellifera] gi:110825772 chromosome 8 complete sequence	3.89e-33	--	--	--	--	--	--	--	M
SI.CL.11.cl.1139.Contig1	gnl|Amel|GB12937-PA	8e-26	chr|NC_007077|NC_007077.2 Chromosome LG8; [Apis mellifera] gi:110825772 chromosome 8 complete sequence	2.55e-30	chr|AMe_AADG05005753|AMe_AADG05005753.1	Linkage group 8; [Apis mellifera] draft genome, Amel_4.0.	6e-44	--	--	--	--	M
SiJWC05ACC.scf	gnl|Amel|GB19012-PA	8e-26	chr|NC_007073|NC_007073.2 Chromosome LG4; [Apis mellifera] gi:110825768 chromosome 4 complete sequence	4.97e-16	--	--	--	ens|ENSAPMP00000034696	pep:novel group:AMEL2.0:GroupUn:27887039:27893297:-1 gene:ENSAPMG00000016005 transcript:ENSAPMT00000034696	1e-24	12	M
SI.CL.25.cl.2528.SiJWA11BAF.scf	gnl|Amel|GB15387-PA	9e-26	chr|NC_007072|NC_007072.2 Chromosome LG3; [Apis mellifera] gi:110825767 chromosome 3 complete sequence	4.64e-13	--	--	--	ens|ENSAPMP00000000578	pep:known group:AMEL2.0:Group3:10320092:10321875:-1 gene:ENSAPMG00000000356 transcript:ENSAPMT00000000578	2e-23	14	M
SI.CL.10.cl.1051.Contig1	gnl|Amel|GB13404-PA	1e-25	chr|NC_007077|NC_007077.2 Chromosome LG8; [Apis mellifera] gi:110825772 chromosome 8 complete sequence	7.26e-31	chr|AMe_AADG05006475|AMe_AADG05006475.1	Linkage group 8; [Apis mellifera] draft genome, Amel_4.0.	9e-07	--	--	--	--	M
SiJWA02AAQ.scf	gnl|Amel|GB11274-PA	1e-25	chr|NC_007083|NC_007083.2 Chromosome LG14; [Apis mellifera] gi:110825763 chromosome 14 complete sequence	2.37e-21	chr|AMe_AADG05006124|AMe_AADG05006124.1	Linkage group 14; [Apis mellifera] draft genome, Amel_4.0.	2e-06	--	--	--	--	M
SI.CL.26.cl.2678.Contig1	gnl|Amel|GB14642-PA	2e-25	chr|NC_007076|NC_007076.2 Chromosome LG7; [Apis mellifera] gi:110825771 chromosome 7 complete sequence	1.58e-25	--	--	--	--	--	--	--	M
SiJWF11ACI.scf	gnl|Amel|GB12274-PA	2e-25	chr|NC_007082|NC_007082.2 Chromosome LG13; [Apis mellifera] gi:110825762 chromosome 13 complete sequence	4.76e-24	--	--	--	ens|ENSAPMP00000029347	pep:known group:AMEL2.0:Group13:1387588:1388386:-1 gene:ENSAPMG00000012375 transcript:ENSAPMT00000029348	5e-23	2	M
SiJWA10CAE.scf	gnl|Amel|GB12223-PA	2e-25	chr|NC_007080|NC_007080.2 Chromosome LG11; [Apis mellifera] gi:110825732 chromosome 11 complete sequence	6.98e-23	chr|AMe_AADG05004459|AMe_AADG05004459.1	Linkage group 11; [Apis mellifera] draft genome, Amel_4.0.	3e-15	--	--	--	--	M
SiJWF09CAK2.scf	gnl|Amel|GB10419-PA	2e-25	chr|NC_007078|NC_007078.2 Chromosome LG9; [Apis mellifera] gi:110825774 chromosome 9 complete sequence	1.71e-10	--	--	--	ens|ENSAPMP00000029509	pep:novel group:AMEL2.0:Group9:4724539:4731489:-1 gene:ENSAPMG00000000192 transcript:ENSAPMT00000029511	2e-23	20	M
SI.CL.0.cl.076.Contig1	gnl|Amel|GB11655-PA	5e-25	chr|NC_007073|NC_007073.2 Chromosome LG4; [Apis mellifera] gi:110825768 chromosome 4 complete sequence	1.18e-29	chr|AMe_AADG05010329|AMe_AADG05010329.1	Linkage group 4; [Apis mellifera] draft genome, Amel_4.0.	3e-21	--	--	--	--	M
SiJWG10ACX.scf	gnl|Amel|GB10364-PA	5e-25	chr|NC_007074|NC_007074.2 Chromosome LG5; [Apis mellifera] gi:110825769 chromosome 5 complete sequence	1.41e-28	chr|AMe_AADG05017616|AMe_AADG05017616.1	Linkage group Un; [Apis mellifera] draft genome, Amel_4.0.	3e-11	--	--	--	--	M
SI.CL.11.cl.1158.Contig1	gnl|Amel|GB11683-PA	8e-25	chr|NC_007083|NC_007083.2 Chromosome LG14; [Apis mellifera] gi:110825763 chromosome 14 complete sequence	4.85e-07	--	--	--	ens|ENSAPMP00000004661	pep:novel group:AMEL2.0:Group14:7719344:7721367:1 gene:ENSAPMG00000002666 transcript:ENSAPMT00000004661	9e-23	7	M
SI.CL.26.cl.2656.SiJWE03BAI.scf	gnl|Amel|GB17972-PA	1e-24	chr|NC_007080|NC_007080.2 Chromosome LG11; [Apis mellifera] gi:110825732 chromosome 11 complete sequence	1.28e-31	chr|AMe_AADG05004091|AMe_AADG05004091.1	Linkage group 11; [Apis mellifera] draft genome, Amel_4.0.	1e-32	--	--	--	--	M
SiJWA04BAE.scf	gnl|Amel|GB19195-PA	1e-24	chr|NC_007080|NC_007080.2 Chromosome LG11; [Apis mellifera] gi:110825732 chromosome 11 complete sequence	6.37e-29	--	--	--	--	--	--	--	M
SiJWB03BAB.scf	gnl|Amel|GB12982-PA	1e-24	chr|NC_007070|NC_007070.2 Chromosome LG1; [Apis mellifera] gi:110825701 chromosome 1 complete sequence	3.56e-23	--	--	--	--	--	--	--	M
SI.CL.27.cl.2746.Contig1	gnl|Amel|GB15948-PA	1e-24	chr|NC_007074|NC_007074.2 Chromosome LG5; [Apis mellifera] gi:110825769 chromosome 5 complete sequence	1.18e-18	--	--	--	--	--	--	--	M
SI.CL.0.cl.038.Contig1	gnl|Amel|GB12231-PA	2e-24	chr|NC_007083|NC_007083.2 Chromosome LG14; [Apis mellifera] gi:110825763 chromosome 14 complete sequence	7.94e-17	chr|AMe_AADG05005111|AMe_AADG05005111.1	Linkage group 14; [Apis mellifera] draft genome, Amel_4.0.	1e-09	ens|ENSAPMP00000015602	pep:novel group:AMEL2.0:Group14:4249098:4252330:-1 gene:ENSAPMG00000008925 transcript:ENSAPMT00000015602	7e-23	19	M
SiJWH02BDE2.scf	gnl|Amel|GB11882-PA	2e-24	chr|NC_007081|NC_007081.2 Chromosome LG12; [Apis mellifera] gi:110825756 chromosome 12 complete sequence	1.17e-16	--	--	--	--	--	--	--	M
SI.CL.23.cl.2344.Contig1	gnl|Amel|GB17736-PA	2e-24	--	--	--	--	--	--	--	--	--	M
SiJWE06ADE.scf	gnl|Amel|GB15276-PA	3e-24	chr|NC_007073|NC_007073.2 Chromosome LG4; [Apis mellifera] gi:110825768 chromosome 4 complete sequence	3.24e-42	chr|AMe_AADG05001567|AMe_AADG05001567.1	Linkage group 4; [Apis mellifera] draft genome, Amel_4.0.	1e-08	--	--	--	--	M
SiJWH06BDP.scf	gnl|Amel|GB10531-PA	3e-24	chr|NC_007079|NC_007079.2 Chromosome LG10; [Apis mellifera] gi:110825711 chromosome 10 complete sequence	2.13e-22	--	--	--	ens|ENSAPMP00000019954	pep:known group:AMEL2.0:Group10:8286185:8290408:1 gene:ENSAPMG00000011906 transcript:ENSAPMT00000019949	8e-22	4	M
SI.CL.2.cl.229.Contig1	gnl|Amel|GB10253-PA	3e-24	chr|NC_007072|NC_007072.2 Chromosome LG3; [Apis mellifera] gi:110825767 chromosome 3 complete sequence	4.71e-21	--	--	--	--	--	--	--	M
SI.CL.17.cl.1757.Contig1	gnl|Amel|GB16162-PA	3e-24	chr|NC_007077|NC_007077.2 Chromosome LG8; [Apis mellifera] gi:110825772 chromosome 8 complete sequence	3.78e-12	--	--	--	ens|ENSAPMP00000024992	pep:known group:AMEL2.0:Group8:5540899:5543012:1 gene:ENSAPMG00000014742 transcript:ENSAPMT00000024991	4e-22	7	M
SiJWE02BDZ.scf	gnl|Amel|GB14203-PA	3e-24	chr|NC_007070|NC_007070.2 Chromosome LG1; [Apis mellifera] gi:110825701 chromosome 1 complete sequence	1.35e-09	--	--	--	--	--	--	--	M
SiJWC01AAE.tag5_C01_05.scf	gnl|Amel|GB18527-PA	4e-24	chr|NC_007074|NC_007074.2 Chromosome LG5; [Apis mellifera] gi:110825769 chromosome 5 complete sequence	1.77e-40	chr|AMe_AADG05002201|AMe_AADG05002201.1	Linkage group 5; [Apis mellifera] draft genome, Amel_4.0.	9e-56	--	--	--	--	M
SI.CL.8.cl.824.Contig1	gnl|Amel|GB13088-PA	4e-24	chr|NC_007085|NC_007085.2 Chromosome LG16; [Apis mellifera] gi:110825765 chromosome 16 complete sequence	2.18e-27	--	--	--	--	--	--	--	M
SI.CL.12.cl.1289.Contig1	gnl|Amel|GB20035-PA	5e-24	chr|NC_007071|NC_007071.2 Chromosome LG2; [Apis mellifera] gi:110825766 chromosome 2 complete sequence	3.9e-28	chr|AMe_AADG05000915|AMe_AADG05000915.1	Linkage group 2; [Apis mellifera] draft genome, Amel_4.0.	1e-13	--	--	--	--	M
SI.CL.14.cl.1463.Contig1	gnl|Amel|GB19739-PA	6e-24	chr|NC_007078|NC_007078.2 Chromosome LG9; [Apis mellifera] gi:110825774 chromosome 9 complete sequence	4.19e-22	--	--	--	--	--	--	--	M
SiJWD01BAE.scf	gnl|Amel|GB20068-PA	6e-24	--	--	chr|AMe_AADG05007498|AMe_AADG05007498.1	Linkage group Un; [Apis mellifera] draft genome, Amel_4.0.	8e-25	--	--	--	--	M
SI.CL.20.cl.2003.SiJWC10ABI.scf	gnl|Amel|GB14589-PA	7e-24	chr|NC_007073|NC_007073.2 Chromosome LG4; [Apis mellifera] gi:110825768 chromosome 4 complete sequence	2.63e-28	--	--	--	ens|ENSAPMP00000013645	pep:novel group:AMEL2.0:GroupUn:86528724:86533937:-1 gene:ENSAPMG00000007800 transcript:ENSAPMT00000013645	9e-22	4	M
SiJWD12CAG.scf	gnl|Amel|GB15805-PA	7e-24	chr|NC_007077|NC_007077.2 Chromosome LG8; [Apis mellifera] gi:110825772 chromosome 8 complete sequence	1.27e-27	chr|AMe_AADG05003046|AMe_AADG05003046.1	Linkage group 8; [Apis mellifera] draft genome, Amel_4.0.	7e-21	--	--	--	--	M
SI.CL.41.cl.4121.Contig1	gnl|Amel|GB18217-PA	7e-24	chr|NC_007075|NC_007075.2 Chromosome LG6; [Apis mellifera] gi:110825770 chromosome 6 complete sequence	1.81e-08	--	--	--	ens|ENSAPMP00000026123	pep:novel group:AMEL2.0:Group6:14168200:14169342:-1 gene:ENSAPMG00000012678 transcript:ENSAPMT00000026124	8e-22	3	M
SI.CL.23.cl.2340.Contig1	gnl|Amel|GB18285-PA	8e-24	chr|NC_007085|NC_007085.2 Chromosome LG16; [Apis mellifera] gi:110825765 chromosome 16 complete sequence	8.16e-28	--	--	--	ens|ENSAPMP00000021953	pep:novel group:AMEL2.0:Group16:5278542:5279315:1 gene:ENSAPMG00000014924 transcript:ENSAPMT00000021947	1e-21	2	M
SI.CL.1.cl.137.Contig1	gnl|Amel|GB16219-PA	9e-24	chr|NC_007083|NC_007083.2 Chromosome LG14; [Apis mellifera] gi:110825763 chromosome 14 complete sequence	3.37e-20	--	--	--	--	--	--	--	M
SI.CL.22.cl.2220.Contig1	gnl|Amel|GB16881-PA	1e-23	chr|NC_007075|NC_007075.2 Chromosome LG6; [Apis mellifera] gi:110825770 chromosome 6 complete sequence	5.43e-16	chr|AMe_AADG05002248|AMe_AADG05002248.1	Linkage group 6; [Apis mellifera] draft genome, Amel_4.0.	8e-29	tr|Q3B714|Q3B714_APIME	(TpnT)Troponin T isoform 3.[Apis mellifera]	6e-21	7	M
SiJWF06BCR.scf	gnl|Amel|GB18492-PA	1e-23	chr|NC_007073|NC_007073.2 Chromosome LG4; [Apis mellifera] gi:110825768 chromosome 4 complete sequence	1.32e-15	--	--	--	--	--	--	--	M
SI.CL.30.cl.3070.Contig1	gnl|Amel|GB10367-PA	1e-23	chr|NC_007075|NC_007075.2 Chromosome LG6; [Apis mellifera] gi:110825770 chromosome 6 complete sequence	3.86e-10	--	--	--	ens|ENSAPMP00000018853	pep:novel group:AMEL2.0:GroupUn:318410276:318414359:1 gene:ENSAPMG00000001300 transcript:ENSAPMT00000018850	1e-21	5	M
SiJWE02AAL.scf	gnl|Amel|GB19396-PA	1e-23	--	--	--	--	--	--	--	--	--	M
SI.CL.31.cl.3185.Contig1	gnl|Amel|GB17785-PA	2e-23	chr|NC_007070|NC_007070.2 Chromosome LG1; [Apis mellifera] gi:110825701 chromosome 1 complete sequence	3.5e-19	chr|AMe_AADG05002206|AMe_AADG05002206.1	Linkage group 5; [Apis mellifera] draft genome, Amel_4.0.	8e-27	--	--	--	--	M
SI.CL.32.cl.3234.Contig1	gnl|Amel|GB12793-PA	2e-23	--	--	--	--	--	--	--	--	--	M
SiJWA05BAX.scf	gnl|Amel|GB15552-PA	2e-23	--	--	--	--	--	--	--	--	--	M
SI.CL.39.cl.3902.Contig1	gnl|Amel|GB19069-PA	3e-23	chr|NC_007074|NC_007074.2 Chromosome LG5; [Apis mellifera] gi:110825769 chromosome 5 complete sequence	2.91e-27	chr|AMe_AADG05001976|AMe_AADG05001976.1	Linkage group 5; [Apis mellifera] draft genome, Amel_4.0.	9e-21	ens|ENSAPMP00000009831	pep:known group:AMEL2.0:Group5:6002903:6004037:-1 gene:ENSAPMG00000005670 transcript:ENSAPMT00000009831	6e-11	9	M
SI.CL.31.cl.3185.SiJWF04BBV2.scf	gnl|Amel|GB17785-PA	3e-23	chr|NC_007070|NC_007070.2 Chromosome LG1; [Apis mellifera] gi:110825701 chromosome 1 complete sequence	6.64e-19	chr|AMe_AADG05002206|AMe_AADG05002206.1	Linkage group 5; [Apis mellifera] draft genome, Amel_4.0.	1e-26	--	--	--	--	M
SI.CL.7.cl.750.Contig2	gnl|Amel|GB14201-PA	3e-23	--	--	--	--	--	ens|ENSAPMP00000025465	pep:novel group:AMEL2.0:GroupUn:131202854:131203780:1 gene:ENSAPMG00000009020 transcript:ENSAPMT00000025465	2e-15	2	M
SiJWH09ACL.scf	gnl|Amel|GB13140-PA	5e-23	chr|NC_007073|NC_007073.2 Chromosome LG4; [Apis mellifera] gi:110825768 chromosome 4 complete sequence	3.32e-25	--	--	--	--	--	--	--	M
SI.CL.5.cl.580.Contig1	gnl|Amel|GB16604-PA	5e-23	chr|NC_007085|NC_007085.2 Chromosome LG16; [Apis mellifera] gi:110825765 chromosome 16 complete sequence	2.12e-21	chr|AMe_AADG05005596|AMe_AADG05005596.1	Linkage group 16; [Apis mellifera] draft genome, Amel_4.0.	5e-15	ens|ENSAPMP00000005352	pep:novel group:AMEL2.0:Group16:2425927:2426609:1 gene:ENSAPMG00000003056 transcript:ENSAPMT00000005352	4e-21	6	M
SI.CL.43.cl.4303.SiJWA12ABP2.scf	gnl|Amel|GB18600-PA	6e-23	--	--	--	--	--	--	--	--	--	M
SI.CL.43.cl.4305.Contig1	gnl|Amel|GB14025-PA	9e-23	chr|NC_007074|NC_007074.2 Chromosome LG5; [Apis mellifera] gi:110825769 chromosome 5 complete sequence	3.15e-18	--	--	--	--	--	--	--	M
SI.CL.8.cl.890.Contig1	gnl|Amel|GB11804-PA	1e-22	chr|NC_007072|NC_007072.2 Chromosome LG3; [Apis mellifera] gi:110825767 chromosome 3 complete sequence	5.38e-07	--	--	--	--	--	--	--	M
SI.CL.1.cl.155.Contig2	gnl|Amel|GB17021-PA	2e-22	chr|NC_007076|NC_007076.2 Chromosome LG7; [Apis mellifera] gi:110825771 chromosome 7 complete sequence	6.9e-18	--	--	--	tr|Q8I8E9|Q8I8E9_APIME	Ammar1 transposase.[Apis mellifera]	5e-25	13	M
SI.CL.29.cl.2989.Contig1	gnl|Amel|GB16494-PA	2e-22	chr|NC_007079|NC_007079.2 Chromosome LG10; [Apis mellifera] gi:110825711 chromosome 10 complete sequence	2.46e-16	--	--	--	ens|ENSAPMP00000035058	pep:known group:AMEL2.0:Group10:4418648:4420074:1 gene:ENSAPMG00000013164 transcript:ENSAPMT00000035058	2e-20	2	M
SI.CL.30.cl.3028.Contig1	gnl|Amel|GB13758-PA	2e-22	chr|NC_007080|NC_007080.2 Chromosome LG11; [Apis mellifera] gi:110825732 chromosome 11 complete sequence	6.4e-14	chr|AMe_AADG05006676|AMe_AADG05006676.1	Linkage group Un; [Apis mellifera] draft genome, Amel_4.0.	2e-16	--	--	--	--	M
SI.CL.5.cl.584.Contig1	gnl|Amel|GB10048-PA	2e-22	--	--	--	--	--	--	--	--	--	M
SI.CL.8.cl.864.Contig1	gnl|Amel|GB13526-PA	4e-22	chr|NC_007077|NC_007077.2 Chromosome LG8; [Apis mellifera] gi:110825772 chromosome 8 complete sequence	1.4e-16	--	--	--	--	--	--	--	M
SI.CL.15.cl.1590.Contig1	gnl|Amel|GB16980-PA	4e-22	chr|NC_007080|NC_007080.2 Chromosome LG11; [Apis mellifera] gi:110825732 chromosome 11 complete sequence	3.37e-10	--	--	--	--	--	--	--	M
SI.CL.21.cl.2158.SiJWD05ADG.scf	gnl|Amel|GB12277-PA	4e-22	--	--	chr|AMe_AADG05006088|AMe_AADG05006088.1	Linkage group Un; [Apis mellifera] draft genome, Amel_4.0.	3e-15	--	--	--	--	M
SiJWE07ACE.SP6.scf	gnl|Amel|GB17367-PA	4e-22	--	--	--	--	--	--	--	--	--	M
SI.CL.0.cl.012.Contig1	gnl|Amel|GB17220-PA	5e-22	chr|NC_007083|NC_007083.2 Chromosome LG14; [Apis mellifera] gi:110825763 chromosome 14 complete sequence	3.28e-12	--	--	--	--	--	--	--	M
SI.CL.13.cl.1319.Contig1	gnl|Amel|GB15252-PA	5e-22	--	--	--	--	--	ens|ENSAPMP00000019376	pep:known group:AMEL2.0:GroupUn:52413509:52414561:1 gene:ENSAPMG00000010816 transcript:ENSAPMT00000019372	6e-20	3	M
SiJWH07ACB.scf	gnl|Amel|GB13783-PA	6e-22	--	--	--	--	--	ens|ENSAPMP00000010093	pep:novel group:AMEL2.0:GroupUn:230088940:230091237:1 gene:ENSAPMG00000013847 transcript:ENSAPMT00000010093	2e-09	10	M
SI.CL.36.cl.3613.Contig1	gnl|Amel|GB11629-PA	7e-22	chr|NC_007076|NC_007076.2 Chromosome LG7; [Apis mellifera] gi:110825771 chromosome 7 complete sequence	6.35e-22	chr|AMe_AADG05002693|AMe_AADG05002693.1	Linkage group 7; [Apis mellifera] draft genome, Amel_4.0.	3e-09	--	--	--	--	M
SI.CL.43.cl.4340.Contig1	gnl|Amel|GB11804-PA	7e-22	chr|NC_007072|NC_007072.2 Chromosome LG3; [Apis mellifera] gi:110825767 chromosome 3 complete sequence	1.74e-21	--	--	--	--	--	--	--	M
SiJWD07BDX.scf	gnl|Amel|GB17876-PA	7e-22	chr|NC_007081|NC_007081.2 Chromosome LG12; [Apis mellifera] gi:110825756 chromosome 12 complete sequence	1.15e-17	chr|AMe_AADG05004626|AMe_AADG05004626.1	Linkage group 12; [Apis mellifera] draft genome, Amel_4.0.	5e-23	ens|ENSAPMP00000030914	pep:novel group:AMEL2.0:Group12:5750697:5775533:-1 gene:ENSAPMG00000009640 transcript:ENSAPMT00000030913	6e-19	2	M
SI.CL.31.cl.3185.SiJWC08BBM2.scf	gnl|Amel|GB17785-PA	7e-22	chr|NC_007070|NC_007070.2 Chromosome LG1; [Apis mellifera] gi:110825701 chromosome 1 complete sequence	2.63e-15	chr|AMe_AADG05002206|AMe_AADG05002206.1	Linkage group 5; [Apis mellifera] draft genome, Amel_4.0.	6e-26	--	--	--	--	M
SI.CL.24.cl.2459.SiJWG09ADT.scf	gnl|Amel|GB17585-PA	7e-22	--	--	--	--	--	--	--	--	--	M
SiJWB04BDV2.scf	gnl|Amel|GB14300-PA	8e-22	chr|NC_007074|NC_007074.2 Chromosome LG5; [Apis mellifera] gi:110825769 chromosome 5 complete sequence	7.85e-26	chr|AMe_AADG05001931|AMe_AADG05001931.1	Linkage group 5; [Apis mellifera] draft genome, Amel_4.0.	2e-31	--	--	--	--	M
SI.CL.20.cl.2048.SiJWH06CAS2.scf	gnl|Amel|GB10334-PA	9e-22	chr|NC_007084|NC_007084.2 Chromosome LG15; [Apis mellifera] gi:110825764 chromosome 15 complete sequence	4.26e-10	--	--	--	--	--	--	--	M
SiJWB03AAP.scf	gnl|Amel|GB15224-PA	1e-21	chr|NC_007072|NC_007072.2 Chromosome LG3; [Apis mellifera] gi:110825767 chromosome 3 complete sequence	4.48e-37	chr|AMe_AADG05001299|AMe_AADG05001299.1	Linkage group 3; [Apis mellifera] draft genome, Amel_4.0.	2e-40	--	--	--	--	M
SI.CL.23.cl.2318.SiJWC01BBA.scf	gnl|Amel|GB18853-PA	1e-21	chr|NC_007076|NC_007076.2 Chromosome LG7; [Apis mellifera] gi:110825771 chromosome 7 complete sequence	7.23e-21	chr|AMe_AADG05001031|AMe_AADG05001031.1	Linkage group 2; [Apis mellifera] draft genome, Amel_4.0.	8e-25	--	--	--	--	M
SI.CL.24.cl.2411.Contig1	gnl|Amel|GB13561-PA	1e-21	chr|NC_007075|NC_007075.2 Chromosome LG6; [Apis mellifera] gi:110825770 chromosome 6 complete sequence	9.85e-15	--	--	--	--	--	--	--	M
SI.CL.24.cl.2439.SiJWG02CAJ2.scf	gnl|Amel|GB11969-PA	1e-21	chr|NC_007081|NC_007081.2 Chromosome LG12; [Apis mellifera] gi:110825756 chromosome 12 complete sequence	2.03e-12	--	--	--	ens|ENSAPMP00000012422	pep:novel group:AMEL2.0:GroupUn:91707147:91709240:1 gene:ENSAPMG00000007123 transcript:ENSAPMT00000012422	5e-19	6	M
SI.CL.20.cl.2048.SiJWC10ADI.scf	gnl|Amel|GB10334-PA	1e-21	chr|NC_007084|NC_007084.2 Chromosome LG15; [Apis mellifera] gi:110825764 chromosome 15 complete sequence	3.79e-10	--	--	--	--	--	--	--	M
SI.CL.20.cl.2048.Contig1	gnl|Amel|GB10334-PA	1e-21	chr|NC_007084|NC_007084.2 Chromosome LG15; [Apis mellifera] gi:110825764 chromosome 15 complete sequence	4.2e-10	--	--	--	--	--	--	--	M
SI.CL.29.cl.2974.SiJWD02BCR.scf	gnl|Amel|GB10076-PA	2e-21	--	--	--	--	--	ens|ENSAPMP00000028163	pep:novel group:AMEL2.0:GroupUn:299978773:299979476:1 gene:ENSAPMG00000016389 transcript:ENSAPMT00000028162	4e-13	2	M
SI.CL.9.cl.972.SiJWE02BAX.scf	gnl|Amel|GB14580-PA	3e-21	chr|NC_007070|NC_007070.2 Chromosome LG1; [Apis mellifera] gi:110825701 chromosome 1 complete sequence	9.6e-25	--	--	--	tr|Q8I8E9|Q8I8E9_APIME	Ammar1 transposase.[Apis mellifera]	2e-22	18	M
SiJWB10ABK.scf	gnl|Amel|GB16844-PA	3e-21	chr|NC_007081|NC_007081.2 Chromosome LG12; [Apis mellifera] gi:110825756 chromosome 12 complete sequence	3.2e-23	chr|AMe_AADG05002189|AMe_AADG05002189.1	Linkage group 5; [Apis mellifera] draft genome, Amel_4.0.	2e-19	tr|O61334|O61334_APIME	Elongation factor-1alpha F2.[Apis mellifera]	2e-18	11	M
SI.CL.35.cl.3588.Contig1	gnl|Amel|GB15094-PA	3e-21	chr|NC_007074|NC_007074.2 Chromosome LG5; [Apis mellifera] gi:110825769 chromosome 5 complete sequence	4.37e-23	--	--	--	--	--	--	--	M
SI.CL.12.cl.1228.Contig1	gnl|Amel|GB13601-PA	4e-21	chr|NC_007084|NC_007084.2 Chromosome LG15; [Apis mellifera] gi:110825764 chromosome 15 complete sequence	1.27e-25	--	--	--	ens|ENSAPMP00000031646	pep:known group:AMEL2.0:Group15:1442484:1443895:-1 gene:ENSAPMG00000013358 transcript:ENSAPMT00000031645	2e-07	8	M
SiJWD09BAG.scf	gnl|Amel|GB10817-PA	5e-21	--	--	--	--	--	--	--	--	--	M
SI.CL.13.cl.1389.Contig1	gnl|Amel|GB13692-PA	6e-21	chr|NC_007073|NC_007073.2 Chromosome LG4; [Apis mellifera] gi:110825768 chromosome 4 complete sequence	1.54e-35	chr|AMe_AADG05001766|AMe_AADG05001766.1	Linkage group 4; [Apis mellifera] draft genome, Amel_4.0.	1e-19	ens|ENSAPMP00000005131	pep:novel group:AMEL2.0:Group4:814329:825881:-1 gene:ENSAPMG00000002943 transcript:ENSAPMT00000005131	4e-17	8	M
SI.CL.11.cl.1108.Contig1	gnl|Amel|GB15825-PA	6e-21	--	--	--	--	--	--	--	--	--	M
SI.CL.22.cl.2256.Contig1	gnl|Amel|GB10169-PA	8e-21	chr|NC_007071|NC_007071.2 Chromosome LG2; [Apis mellifera] gi:110825766 chromosome 2 complete sequence	8.04e-37	--	--	--	--	--	--	--	M
SI.CL.13.cl.1369.SiJWD03ABS.scf	gnl|Amel|GB19161-PA	8e-21	--	--	--	--	--	ens|ENSAPMP00000019432	pep:novel group:AMEL2.0:GroupUn:24943941:24948051:1 gene:ENSAPMG00000009933 transcript:ENSAPMT00000019428	1e-18	5	M
SI.CL.18.cl.1824.Contig1	gnl|Amel|GB17630-PA	9e-21	chr|NC_007074|NC_007074.2 Chromosome LG5; [Apis mellifera] gi:110825769 chromosome 5 complete sequence	7.89e-07	chr|AMe_AADG05002202|AMe_AADG05002202.1	Linkage group 5; [Apis mellifera] draft genome, Amel_4.0.	2e-06	ens|ENSAPMP00000019491	pep:novel group:AMEL2.0:Group5:12737787:12738938:-1 gene:ENSAPMG00000001048 transcript:ENSAPMT00000019487	2e-20	11	M
SI.CL.3.cl.378.Contig2	gnl|Amel|GB10487-PA	1e-20	chr|NC_007082|NC_007082.2 Chromosome LG13; [Apis mellifera] gi:110825762 chromosome 13 complete sequence	3.28e-10	--	--	--	ens|ENSAPMP00000009498	pep:novel group:AMEL2.0:Group13:2117036:2118812:-1 gene:ENSAPMG00000017007 transcript:ENSAPMT00000009498	5e-14	2	M
SiJWF12AAA2.scf	gnl|Amel|GB13433-PA	1e-20	--	--	chr|AMe_AADG05008259|AMe_AADG05008259.1	Linkage group Un; [Apis mellifera] draft genome, Amel_4.0.	3e-52	--	--	--	--	M
SI.CL.4.cl.409.Contig1	gnl|Amel|GB14993-PA	1e-20	--	--	--	--	--	ens|ENSAPMP00000029450	pep:novel group:AMEL2.0:GroupUn:54055238:54056074:1 gene:ENSAPMG00000009930 transcript:ENSAPMT00000029452	2e-07	18	M
SI.CL.38.cl.3863.Contig1	gnl|Amel|GB15746-PA	1e-20	--	--	--	--	--	ens|ENSAPMP00000031460	pep:novel group:AMEL2.0:GroupUn:55076964:55088567:-1 gene:ENSAPMG00000002771 transcript:ENSAPMT00000031459	3e-18	3	M
SiJWB06BAZ2.scf	gnl|Amel|GB11684-PA	1e-20	--	--	--	--	--	--	--	--	--	M
SI.CL.14.cl.1415.Contig1	gnl|Amel|GB12684-PA	2e-20	chr|NC_007071|NC_007071.2 Chromosome LG2; [Apis mellifera] gi:110825766 chromosome 2 complete sequence	2.86e-57	chr|AMe_AADG05001050|AMe_AADG05001050.1	Linkage group 2; [Apis mellifera] draft genome, Amel_4.0.	6e-20	--	--	--	--	M
SiJWF01AAP.scf	gnl|Amel|GB19220-PA	2e-20	chr|NC_007076|NC_007076.2 Chromosome LG7; [Apis mellifera] gi:110825771 chromosome 7 complete sequence	1.16e-42	chr|AMe_AADG05006136|AMe_AADG05006136.1	Linkage group 7; [Apis mellifera] draft genome, Amel_4.0.	5e-29	--	--	--	--	M
SI.CL.15.cl.1537.Contig1	gnl|Amel|GB17021-PA	2e-20	chr|NC_007076|NC_007076.2 Chromosome LG7; [Apis mellifera] gi:110825771 chromosome 7 complete sequence	1.12e-33	--	--	--	--	--	--	--	M
SI.CL.21.cl.2101.Contig1	gnl|Amel|GB16946-PA	2e-20	chr|NC_007070|NC_007070.2 Chromosome LG1; [Apis mellifera] gi:110825701 chromosome 1 complete sequence	1.06e-31	chr|AMe_AADG05000663|AMe_AADG05000663.1	Linkage group 1; [Apis mellifera] draft genome, Amel_4.0.	9e-06	--	--	--	--	M
SI.CL.34.cl.3497.Contig1	gnl|Amel|GB12681-PA	2e-20	chr|NC_007078|NC_007078.2 Chromosome LG9; [Apis mellifera] gi:110825774 chromosome 9 complete sequence	1.51e-24	--	--	--	--	--	--	--	M
SiJWG04ADQ.scf	gnl|Amel|GB16974-PA	2e-20	chr|NC_007075|NC_007075.2 Chromosome LG6; [Apis mellifera] gi:110825770 chromosome 6 complete sequence	1.2e-20	chr|AMe_AADG05006171|AMe_AADG05006171.1	Linkage group 6; [Apis mellifera] draft genome, Amel_4.0.	2e-10	--	--	--	--	M
SiJWB03AAL.scf	gnl|Amel|GB10537-PA	2e-20	chr|NC_007080|NC_007080.2 Chromosome LG11; [Apis mellifera] gi:110825732 chromosome 11 complete sequence	2.21e-18	--	--	--	--	--	--	--	M
SiJWA08ADG.scf	gnl|Amel|GB14553-PA	3e-20	chr|NC_007085|NC_007085.2 Chromosome LG16; [Apis mellifera] gi:110825765 chromosome 16 complete sequence	2.53e-24	chr|AMe_AADG05005682|AMe_AADG05005682.1	Linkage group 16; [Apis mellifera] draft genome, Amel_4.0.	5e-11	ens|ENSAPMP00000006123	pep:known group:AMEL2.0:Group16:4648539:4649250:-1 gene:ENSAPMG00000003488 transcript:ENSAPMT00000006123	9e-18	15	M
SI.CL.3.cl.378.Contig1	gnl|Amel|GB10487-PA	3e-20	chr|NC_007082|NC_007082.2 Chromosome LG13; [Apis mellifera] gi:110825762 chromosome 13 complete sequence	1e-05	--	--	--	ens|ENSAPMP00000009498	pep:novel group:AMEL2.0:Group13:2117036:2118812:-1 gene:ENSAPMG00000017007 transcript:ENSAPMT00000009498	2e-13	5	M
SI.CL.31.cl.3128.Contig1	gnl|Amel|GB19429-PA	4e-20	chr|NC_007073|NC_007073.2 Chromosome LG4; [Apis mellifera] gi:110825768 chromosome 4 complete sequence	3.62e-36	chr|AMe_AADG05001577|AMe_AADG05001577.1	Linkage group 4; [Apis mellifera] draft genome, Amel_4.0.	5e-96	ens|ENSAPMP00000014918	pep:novel group:AMEL2.0:Group4:878118:890741:-1 gene:ENSAPMG00000008517 transcript:ENSAPMT00000014918	4e-18	6	M
SiJWC05AAK.scf	gnl|Amel|GB14168-PA	4e-20	chr|NC_007080|NC_007080.2 Chromosome LG11; [Apis mellifera] gi:110825732 chromosome 11 complete sequence	2.37e-23	--	--	--	--	--	--	--	M
SI.CL.12.cl.1266.Contig1	gnl|Amel|GB19291-PA	4e-20	--	--	--	--	--	--	--	--	--	M
SI.CL.9.cl.906.SiJWB02BCN2.scf	gnl|Amel|GB16412-PA	5e-20	chr|NC_007078|NC_007078.2 Chromosome LG9; [Apis mellifera] gi:110825774 chromosome 9 complete sequence	3.83e-23	chr|AMe_AADG05003575|AMe_AADG05003575.1	Linkage group 9; [Apis mellifera] draft genome, Amel_4.0.	2e-10	ens|ENSAPMP00000001038	pep:novel group:AMEL2.0:Group9:5447361:5450159:1 gene:ENSAPMG00000000643 transcript:ENSAPMT00000001038	1e-17	5	M
SiJWG12ABF.scf	gnl|Amel|GB15825-PA	5e-20	--	--	--	--	--	--	--	--	--	M
SI.CL.10.cl.1029.Contig1	gnl|Amel|GB11864-PA	6e-20	chr|NC_007081|NC_007081.2 Chromosome LG12; [Apis mellifera] gi:110825756 chromosome 12 complete sequence	6.7e-21	--	--	--	--	--	--	--	M
SI.CL.0.cl.062.SiJWC02BBR.scf	gnl|Amel|GB14284-PA	6e-20	chr|NC_007075|NC_007075.2 Chromosome LG6; [Apis mellifera] gi:110825770 chromosome 6 complete sequence	2.38e-11	--	--	--	ens|ENSAPMP00000007479	pep:novel group:AMEL2.0:Group6:13187796:13190398:1 gene:ENSAPMG00000004333 transcript:ENSAPMT00000007479	1e-17	4	M
SiJWG05BBB.scf	gnl|Amel|GB11507-PA	7e-20	chr|NC_007083|NC_007083.2 Chromosome LG14; [Apis mellifera] gi:110825763 chromosome 14 complete sequence	3.13e-19	--	--	--	--	--	--	--	M
SiJWE06BAR.scf	gnl|Amel|GB17751-PA	1e-19	chr|NC_007085|NC_007085.2 Chromosome LG16; [Apis mellifera] gi:110825765 chromosome 16 complete sequence	1.32e-25	--	--	--	--	--	--	--	M
SI.CL.11.cl.1144.SiJWH11BCH2.scf	gnl|Amel|GB16679-PA	1e-19	chr|NC_007085|NC_007085.2 Chromosome LG16; [Apis mellifera] gi:110825765 chromosome 16 complete sequence	1.46e-20	--	--	--	--	--	--	--	M
SiJWB08BDL2.scf	gnl|Amel|GB17401-PA	1e-19	--	--	--	--	--	--	--	--	--	M
SiJWC01BCQ.tag5_C01_05.scf	gnl|Amel|GB10069-PA	2e-19	chr|NC_007077|NC_007077.2 Chromosome LG8; [Apis mellifera] gi:110825772 chromosome 8 complete sequence	1.41e-22	--	--	--	--	--	--	--	M
SiJWD10ADC.scf	gnl|Amel|GB10570-PA	2e-19	chr|NC_007078|NC_007078.2 Chromosome LG9; [Apis mellifera] gi:110825774 chromosome 9 complete sequence	1.38e-13	--	--	--	--	--	--	--	M
SiJWH03BDQ.scf	gnl|Amel|GB10297-PA	2e-19	chr|NC_007071|NC_007071.2 Chromosome LG2; [Apis mellifera] gi:110825766 chromosome 2 complete sequence	2.13e-13	chr|AMe_AADG05006412|AMe_AADG05006412.1	Linkage group 2; [Apis mellifera] draft genome, Amel_4.0.	1e-08	--	--	--	--	M
SiJWE07BAI.scf	gnl|Amel|GB15238-PA	2e-19	chr|NC_007083|NC_007083.2 Chromosome LG14; [Apis mellifera] gi:110825763 chromosome 14 complete sequence	1.65e-08	chr|AMe_AADG05005022|AMe_AADG05005022.1	Linkage group 14; [Apis mellifera] draft genome, Amel_4.0.	1e-11	ens|ENSAPMP00000005742	pep:novel group:AMEL2.0:Group14:1201527:1203806:1 gene:ENSAPMG00000003272 transcript:ENSAPMT00000005742	1e-14	16	M
SiJWB03BCA2.scf	gnl|Amel|GB11194-PA	3e-19	--	--	--	--	--	ens|ENSAPMP00000012960	pep:novel group:AMEL2.0:GroupUn:17044856:17045530:1 gene:ENSAPMG00000007423 transcript:ENSAPMT00000012960	5e-12	20	M
SI.CL.0.cl.071.Contig1	gnl|Amel|GB14050-PA	5e-19	chr|NC_007071|NC_007071.2 Chromosome LG2; [Apis mellifera] gi:110825766 chromosome 2 complete sequence	4.68e-21	chr|AMe_AADG05000796|AMe_AADG05000796.1	Linkage group 2; [Apis mellifera] draft genome, Amel_4.0.	4e-07	--	--	--	--	M
SiJWH04BBA.scf	gnl|Amel|GB16883-PA	6e-19	chr|NC_007077|NC_007077.2 Chromosome LG8; [Apis mellifera] gi:110825772 chromosome 8 complete sequence	1.34e-24	--	--	--	ens|ENSAPMP00000035432	pep:novel group:AMEL2.0:Group8:1580044:1590663:1 gene:ENSAPMG00000008526 transcript:ENSAPMT00000035433	6e-17	4	M
SiJWF11AAP.scf	gnl|Amel|GB13900-PA	6e-19	chr|NC_007075|NC_007075.2 Chromosome LG6; [Apis mellifera] gi:110825770 chromosome 6 complete sequence	3.8e-18	chr|AMe_AADG05002632|AMe_AADG05002632.1	Linkage group 6; [Apis mellifera] draft genome, Amel_4.0.	2e-10	--	--	--	--	M
SI.CL.25.cl.2529.Contig1	gnl|Amel|GB19506-PA	8e-19	chr|NC_007078|NC_007078.2 Chromosome LG9; [Apis mellifera] gi:110825774 chromosome 9 complete sequence	7.03e-34	--	--	--	--	--	--	--	M
SI.CL.18.cl.1810.Contig1	gnl|Amel|GB17670-PA	8e-19	chr|NC_007074|NC_007074.2 Chromosome LG5; [Apis mellifera] gi:110825769 chromosome 5 complete sequence	1.67e-17	--	--	--	--	--	--	--	M
SI.CL.26.cl.2623.Contig1	gnl|Amel|GB15613-PA	9e-19	chr|NC_007078|NC_007078.2 Chromosome LG9; [Apis mellifera] gi:110825774 chromosome 9 complete sequence	7.82e-29	chr|AMe_AADG05003427|AMe_AADG05003427.1	Linkage group 9; [Apis mellifera] draft genome, Amel_4.0.	2e-21	--	--	--	--	M
SI.CL.1.cl.157.SiJWG08BCRR3A04.scf	gnl|Amel|GB17552-PA	9e-19	--	--	chr|AMe_AADG05008510|AMe_AADG05008510.1	Linkage group Un; [Apis mellifera] draft genome, Amel_4.0.	3e-06	--	--	--	--	M
SiJWF11CAC2.scf	gnl|Amel|GB18531-PA	1e-18	chr|NC_007074|NC_007074.2 Chromosome LG5; [Apis mellifera] gi:110825769 chromosome 5 complete sequence	5.47e-21	chr|AMe_AADG05001961|AMe_AADG05001961.1	Linkage group 5; [Apis mellifera] draft genome, Amel_4.0.	4e-11	--	--	--	--	M
SI.CL.16.cl.1692.Contig1	gnl|Amel|GB13620-PA	1e-18	--	--	--	--	--	ens|ENSAPMP00000011763	pep:known group:AMEL2.0:GroupUn:41527792:41530297:1 gene:ENSAPMG00000006760 transcript:ENSAPMT00000011763	1e-16	3	M
SI.CL.6.cl.691.Contig1	gnl|Amel|GB13451-PA	2e-18	chr|NC_007072|NC_007072.2 Chromosome LG3; [Apis mellifera] gi:110825767 chromosome 3 complete sequence	2.49e-40	chr|AMe_AADG05017747|AMe_AADG05017747.1	Linkage group Un; [Apis mellifera] draft genome, Amel_4.0.	7e-32	--	--	--	--	M
SI.CL.1.cl.157.SiJWB05AAD.scf	gnl|Amel|GB17552-PA	2e-18	--	--	chr|AMe_AADG05008510|AMe_AADG05008510.1	Linkage group Un; [Apis mellifera] draft genome, Amel_4.0.	2e-06	--	--	--	--	M
SI.CL.35.cl.3507.Contig1	gnl|Amel|GB12556-PA	3e-18	chr|NC_007076|NC_007076.2 Chromosome LG7; [Apis mellifera] gi:110825771 chromosome 7 complete sequence	1.7e-45	chr|AMe_AADG05002860|AMe_AADG05002860.1	Linkage group 7; [Apis mellifera] draft genome, Amel_4.0.	7e-10	ens|ENSAPMP00000016299	pep:known group:AMEL2.0:Group7:5309500:5315138:-1 gene:ENSAPMG00000009314 transcript:ENSAPMT00000016299	4e-35	4	M
SiJWD04BDY.scf	gnl|Amel|GB10816-PA	3e-18	chr|NC_007072|NC_007072.2 Chromosome LG3; [Apis mellifera] gi:110825767 chromosome 3 complete sequence	1.3e-10	--	--	--	ens|ENSAPMP00000029436	pep:novel group:AMEL2.0:Group3:4322519:4340462:-1 gene:ENSAPMG00000003685 transcript:ENSAPMT00000029438	1e-12	3	M
SiJWD02ABW.scf	gnl|Amel|GB12328-PA	4e-18	chr|NC_007080|NC_007080.2 Chromosome LG11; [Apis mellifera] gi:110825732 chromosome 11 complete sequence	1.87e-17	--	--	--	--	--	--	--	M
SI.CL.8.cl.847.Contig1	gnl|Amel|GB17787-PA	4e-18	chr|NC_007073|NC_007073.2 Chromosome LG4; [Apis mellifera] gi:110825768 chromosome 4 complete sequence	3.2e-13	--	--	--	ens|ENSAPMP00000001504	pep:novel group:AMEL2.0:Group4:1460806:1461551:1 gene:ENSAPMG00000000892 transcript:ENSAPMT00000001504	4e-16	6	M
SiJWD01BBSR2F05.scf	gnl|Amel|GB17826-PA	5e-18	chr|NC_007079|NC_007079.2 Chromosome LG10; [Apis mellifera] gi:110825711 chromosome 10 complete sequence	2.63e-17	chr|AMe_AADG05017334|AMe_AADG05017334.1	Linkage group Un; [Apis mellifera] draft genome, Amel_4.0.	3e-12	--	--	--	--	M
SiJWE02ACV.scf	gnl|Amel|GB18385-PA	6e-18	chr|NC_007070|NC_007070.2 Chromosome LG1; [Apis mellifera] gi:110825701 chromosome 1 complete sequence	1.37e-16	--	--	--	--	--	--	--	M
SI.CL.17.cl.1780.Contig1	gnl|Amel|GB14668-PA	8e-18	chr|NC_007072|NC_007072.2 Chromosome LG3; [Apis mellifera] gi:110825767 chromosome 3 complete sequence	1.31e-15	--	--	--	--	--	--	--	M
SI.CL.3.cl.341.Contig1	gnl|Amel|GB13864-PA	8e-18	chr|NC_007083|NC_007083.2 Chromosome LG14; [Apis mellifera] gi:110825763 chromosome 14 complete sequence	4.59e-10	--	--	--	--	--	--	--	M
SiJWE05CAA.scf	gnl|Amel|GB14303-PA	1e-17	chr|NC_007073|NC_007073.2 Chromosome LG4; [Apis mellifera] gi:110825768 chromosome 4 complete sequence	8.49e-17	--	--	--	--	--	--	--	M
SiJWC03ADE.scf	gnl|Amel|GB13882-PA	1e-17	chr|NC_007076|NC_007076.2 Chromosome LG7; [Apis mellifera] gi:110825771 chromosome 7 complete sequence	5.02e-14	--	--	--	ens|ENSAPMP00000008169	pep:known group:AMEL2.0:Group7:228077:229556:-1 gene:ENSAPMG00000004714 transcript:ENSAPMT00000008169	6e-15	4	M
SiJWD07ADJ.scf	gnl|Amel|GB13222-PA	1e-17	chr|NC_007071|NC_007071.2 Chromosome LG2; [Apis mellifera] gi:110825766 chromosome 2 complete sequence	2.04e-06	--	--	--	--	--	--	--	M
SiJWH11AAC2.scf	gnl|Amel|GB17964-PA	1e-17	--	--	chr|AMe_AADG05011846|AMe_AADG05011846.1	Linkage group Un; [Apis mellifera] draft genome, Amel_4.0.	4e-70	--	--	--	--	M
SiJWC03CAW.scf	gnl|Amel|GB10101-PA	2e-17	chr|NC_007078|NC_007078.2 Chromosome LG9; [Apis mellifera] gi:110825774 chromosome 9 complete sequence	1.22e-13	--	--	--	--	--	--	--	M
SiJWC10AAZ.scf	gnl|Amel|GB15117-PA	2e-17	chr|NC_007076|NC_007076.2 Chromosome LG7; [Apis mellifera] gi:110825771 chromosome 7 complete sequence	3.52e-13	--	--	--	--	--	--	--	M
SI.CL.41.cl.4116.Contig1	gnl|Amel|GB18311-PA	3e-17	chr|NC_007079|NC_007079.2 Chromosome LG10; [Apis mellifera] gi:110825711 chromosome 10 complete sequence	1e-19	chr|AMe_AADG05006313|AMe_AADG05006313.1	Linkage group Un; [Apis mellifera] draft genome, Amel_4.0.	6e-21	ens|ENSAPMP00000032965	pep:novel group:AMEL2.0:Group10:12238:35241:-1 gene:ENSAPMG00000007803 transcript:ENSAPMT00000032965	2e-15	7	M
SiJWB08BBS.scf	gnl|Amel|GB19857-PA	3e-17	chr|NC_007081|NC_007081.2 Chromosome LG12; [Apis mellifera] gi:110825756 chromosome 12 complete sequence	1.21e-19	chr|AMe_AADG05004660|AMe_AADG05004660.1	Linkage group 12; [Apis mellifera] draft genome, Amel_4.0.	1e-17	ens|ENSAPMP00000017701	pep:novel group:AMEL2.0:GroupUn:96184155:96185952:1 gene:ENSAPMG00000016568 transcript:ENSAPMT00000017700	1e-14	8	M
SI.CL.21.cl.2183.Contig1	gnl|Amel|GB12980-PA	3e-17	chr|NC_007073|NC_007073.2 Chromosome LG4; [Apis mellifera] gi:110825768 chromosome 4 complete sequence	7.03e-18	--	--	--	--	--	--	--	M
SI.CL.8.cl.811.Contig1	gnl|Amel|GB17561-PA	4e-17	chr|NC_007078|NC_007078.2 Chromosome LG9; [Apis mellifera] gi:110825774 chromosome 9 complete sequence	1.61e-25	--	--	--	--	--	--	--	M
SiJWC06BBU.scf	gnl|Amel|GB18379-PA	4e-17	chr|NC_007075|NC_007075.2 Chromosome LG6; [Apis mellifera] gi:110825770 chromosome 6 complete sequence	1.4e-20	--	--	--	--	--	--	--	M
SI.CL.22.cl.2260.Contig1	gnl|Amel|GB11696-PA	4e-17	chr|NC_007074|NC_007074.2 Chromosome LG5; [Apis mellifera] gi:110825769 chromosome 5 complete sequence	5.42e-14	--	--	--	--	--	--	--	M
SI.CL.27.cl.2722.Contig1	gnl|Amel|GB17021-PA	4e-17	chr|NC_007071|NC_007071.2 Chromosome LG2; [Apis mellifera] gi:110825766 chromosome 2 complete sequence	7.28e-14	--	--	--	--	--	--	--	M
SI.CL.4.cl.495.Contig1	gnl|Amel|GB19224-PA	4e-17	chr|NC_007074|NC_007074.2 Chromosome LG5; [Apis mellifera] gi:110825769 chromosome 5 complete sequence	4.62e-13	--	--	--	ens|ENSAPMP00000003316	pep:novel group:AMEL2.0:Group5:9143721:9144864:-1 gene:ENSAPMG00000001935 transcript:ENSAPMT00000003316	4e-15	2	M
SiJWD06BDP.scf	gnl|Amel|GB11068-PA	4e-17	chr|NC_007077|NC_007077.2 Chromosome LG8; [Apis mellifera] gi:110825772 chromosome 8 complete sequence	3.68e-11	--	--	--	--	--	--	--	M
SI.CL.5.cl.515.SiJWA08AEA.scf	gnl|Amel|GB17745-PA	5e-17	chr|NC_007077|NC_007077.2 Chromosome LG8; [Apis mellifera] gi:110825772 chromosome 8 complete sequence	1.53e-19	--	--	--	--	--	--	--	M
SI.CL.10.cl.1075.SiJWE01BBF.scf	gnl|Amel|GB16295-PA	6e-17	chr|NC_007072|NC_007072.2 Chromosome LG3; [Apis mellifera] gi:110825767 chromosome 3 complete sequence	1.61e-15	--	--	--	ens|ENSAPMP00000008629	pep:known group:AMEL2.0:Group3:1531644:1532307:-1 gene:ENSAPMG00000004987 transcript:ENSAPMT00000008629	7e-15	6	M
SI.CL.21.cl.2136.Contig1	gnl|Amel|GB19975-PA	7e-17	chr|NC_007080|NC_007080.2 Chromosome LG11; [Apis mellifera] gi:110825732 chromosome 11 complete sequence	4.25e-20	chr|AMe_AADG05004297|AMe_AADG05004297.1	Linkage group 11; [Apis mellifera] draft genome, Amel_4.0.	6e-09	--	--	--	--	M
SI.CL.19.cl.1916.SiJWA06ADR.scf	gnl|Amel|GB18516-PA	7e-17	chr|NC_007077|NC_007077.2 Chromosome LG8; [Apis mellifera] gi:110825772 chromosome 8 complete sequence	2.26e-12	--	--	--	ens|ENSAPMP00000023281	pep:novel group:AMEL2.0:GroupUn:25375081:25375667:-1 gene:ENSAPMG00000015359 transcript:ENSAPMT00000023277	2e-15	6	M
SI.CL.19.cl.1916.SiJWA01ABU.scf	gnl|Amel|GB18516-PA	7e-17	chr|NC_007077|NC_007077.2 Chromosome LG8; [Apis mellifera] gi:110825772 chromosome 8 complete sequence	2.35e-12	--	--	--	ens|ENSAPMP00000023281	pep:novel group:AMEL2.0:GroupUn:25375081:25375667:-1 gene:ENSAPMG00000015359 transcript:ENSAPMT00000023277	2e-15	6	M
SI.CL.19.cl.1916.SiJWC01BAT.scf	gnl|Amel|GB18516-PA	8e-17	chr|NC_007077|NC_007077.2 Chromosome LG8; [Apis mellifera] gi:110825772 chromosome 8 complete sequence	2.35e-12	--	--	--	ens|ENSAPMP00000023281	pep:novel group:AMEL2.0:GroupUn:25375081:25375667:-1 gene:ENSAPMG00000015359 transcript:ENSAPMT00000023277	1e-15	5	M
SI.CL.19.cl.1916.SiJWD09BDW.scf	gnl|Amel|GB18516-PA	9e-17	chr|NC_007077|NC_007077.2 Chromosome LG8; [Apis mellifera] gi:110825772 chromosome 8 complete sequence	2.93e-12	--	--	--	ens|ENSAPMP00000023281	pep:novel group:AMEL2.0:GroupUn:25375081:25375667:-1 gene:ENSAPMG00000015359 transcript:ENSAPMT00000023277	3e-15	9	M
SiJWA02ACN.scf	gnl|Amel|GB15050-PA	9e-17	--	--	chr|AMe_AADG05006505|AMe_AADG05006505.1	Linkage group Un; [Apis mellifera] draft genome, Amel_4.0.	2e-16	ens|ENSAPMP00000026173	pep:novel group:AMEL2.0:GroupUn:74287974:74289932:1 gene:ENSAPMG00000001417 transcript:ENSAPMT00000026174	4e-12	3	M
SI.CL.14.cl.1454.Contig1	gnl|Amel|GB12365-PA	1e-16	chr|NC_007074|NC_007074.2 Chromosome LG5; [Apis mellifera] gi:110825769 chromosome 5 complete sequence	2.88e-20	--	--	--	--	--	--	--	M
SI.CL.19.cl.1916.Contig1	gnl|Amel|GB18516-PA	1e-16	chr|NC_007077|NC_007077.2 Chromosome LG8; [Apis mellifera] gi:110825772 chromosome 8 complete sequence	2.69e-12	--	--	--	ens|ENSAPMP00000023281	pep:novel group:AMEL2.0:GroupUn:25375081:25375667:-1 gene:ENSAPMG00000015359 transcript:ENSAPMT00000023277	3e-15	9	M
SI.CL.15.cl.1517.Contig1	gnl|Amel|GB18363-PA	1e-16	--	--	--	--	--	--	--	--	--	M
SI.CL.28.cl.2881.Contig1	gnl|Amel|GB10474-PA	1e-16	--	--	--	--	--	ens|ENSAPMP00000022092	pep:novel group:AMEL2.0:GroupUn:7378144:7379565:-1 gene:ENSAPMG00000016281 transcript:ENSAPMT00000022086	1e-14	2	M
SI.CL.9.cl.976.Contig2	gnl|Amel|GB10891-PA	2e-16	chr|NC_007078|NC_007078.2 Chromosome LG9; [Apis mellifera] gi:110825774 chromosome 9 complete sequence	1.45e-38	--	--	--	ens|ENSAPMP00000020717	pep:known group:AMEL2.0:Group9:1014065:1018493:-1 gene:ENSAPMG00000004332 transcript:ENSAPMT00000020711	2e-14	20	M
SI.CL.38.cl.3817.Contig1	gnl|Amel|GB12228-PA	2e-16	chr|NC_007071|NC_007071.2 Chromosome LG2; [Apis mellifera] gi:110825766 chromosome 2 complete sequence	5.49e-19	--	--	--	--	--	--	--	M
SiJWB10BAG.scf	gnl|Amel|GB14023-PA	2e-16	chr|NC_007071|NC_007071.2 Chromosome LG2; [Apis mellifera] gi:110825766 chromosome 2 complete sequence	8.88e-08	--	--	--	ens|ENSAPMP00000024801	pep:known group:AMEL2.0:Group2:4488197:4489000:1 gene:ENSAPMG00000012605 transcript:ENSAPMT00000024799	1e-14	6	M
SI.CL.7.cl.782.Contig1	gnl|Amel|GB10014-PA	3e-16	chr|NC_007078|NC_007078.2 Chromosome LG9; [Apis mellifera] gi:110825774 chromosome 9 complete sequence	1.05e-19	--	--	--	--	--	--	--	M
SI.CL.12.cl.1297.SiJWA04AAP.scf	gnl|Amel|GB14937-PA	3e-16	chr|NC_007070|NC_007070.2 Chromosome LG1; [Apis mellifera] gi:110825701 chromosome 1 complete sequence	1.04e-18	--	--	--	--	--	--	--	M
SI.CL.17.cl.1779.Contig1	gnl|Amel|GB11040-PA	4e-16	chr|NC_007076|NC_007076.2 Chromosome LG7; [Apis mellifera] gi:110825771 chromosome 7 complete sequence	1.02e-20	--	--	--	--	--	--	--	M
SI.CL.28.cl.2834.Contig2	gnl|Amel|GB10191-PA	4e-16	chr|NC_007074|NC_007074.2 Chromosome LG5; [Apis mellifera] gi:110825769 chromosome 5 complete sequence	9.09e-19	--	--	--	--	--	--	--	M
SiJWA09ACL.scf	gnl|Amel|GB14642-PA	5e-16	chr|NC_007076|NC_007076.2 Chromosome LG7; [Apis mellifera] gi:110825771 chromosome 7 complete sequence	2.15e-19	--	--	--	--	--	--	--	M
SI.CL.21.cl.2140.Contig1	gnl|Amel|GB12198-PA	5e-16	chr|NC_007078|NC_007078.2 Chromosome LG9; [Apis mellifera] gi:110825774 chromosome 9 complete sequence	1.67e-18	--	--	--	ens|ENSAPMP00000022253	pep:novel group:AMEL2.0:Group9:912019:919093:1 gene:ENSAPMG00000005653 transcript:ENSAPMT00000022247	6e-14	2	M
SI.CL.42.cl.4232.SiJWF05BDM2.scf	gnl|Amel|GB16474-PA	7e-16	chr|NC_007079|NC_007079.2 Chromosome LG10; [Apis mellifera] gi:110825711 chromosome 10 complete sequence	6.47e-19	--	--	--	--	--	--	--	M
SI.CL.6.cl.675.Contig1	gnl|Amel|GB15684-PA	8e-16	chr|NC_007077|NC_007077.2 Chromosome LG8; [Apis mellifera] gi:110825772 chromosome 8 complete sequence	8.23e-16	--	--	--	--	--	--	--	M
SiJWD11BCR.scf	gnl|Amel|GB10131-PA	1e-15	chr|NC_007080|NC_007080.2 Chromosome LG11; [Apis mellifera] gi:110825732 chromosome 11 complete sequence	1.06e-17	--	--	--	--	--	--	--	M
SI.CL.4.cl.421.Contig1	gnl|Amel|GB19242-PA	1e-15	chr|NC_007074|NC_007074.2 Chromosome LG5; [Apis mellifera] gi:110825769 chromosome 5 complete sequence	1.81e-09	--	--	--	--	--	--	--	M
SI.CL.28.cl.2851.SiJWA07BCL2.scf	gnl|Amel|GB16793-PA	1e-15	--	--	--	--	--	--	--	--	--	M
SI.CL.9.cl.972.SiJWH01ACS.scf	gnl|Amel|GB14580-PA	2e-15	chr|NC_007082|NC_007082.2 Chromosome LG13; [Apis mellifera] gi:110825762 chromosome 13 complete sequence	1.4e-17	--	--	--	--	--	--	--	M
SI.CL.5.cl.523.SiJWE12AAB.scf	gnl|Amel|GB18045-PA	2e-15	--	--	--	--	--	--	--	--	--	M
SiJWA06AAT.scf	gnl|Amel|GB16914-PA	2e-15	--	--	--	--	--	--	--	--	--	M
SiJWG07CAT2.scf	gnl|Amel|GB14747-PA	2e-15	--	--	--	--	--	--	--	--	--	M
SI.CL.5.cl.569.Contig1	gnl|Amel|GB18086-PA	3e-15	chr|NC_007074|NC_007074.2 Chromosome LG5; [Apis mellifera] gi:110825769 chromosome 5 complete sequence	2.96e-19	--	--	--	ens|ENSAPMP00000022424	pep:novel group:AMEL2.0:Group5:13275241:13276013:-1 gene:ENSAPMG00000014642 transcript:ENSAPMT00000022420	3e-13	6	M
SiJWG10ADZ.scf	gnl|Amel|GB13432-PA	3e-15	chr|NC_007080|NC_007080.2 Chromosome LG11; [Apis mellifera] gi:110825732 chromosome 11 complete sequence	6.89e-12	--	--	--	--	--	--	--	M
SiJWF04ACO.scf	gnl|Amel|GB10692-PA	3e-15	chr|NC_007077|NC_007077.2 Chromosome LG8; [Apis mellifera] gi:110825772 chromosome 8 complete sequence	7.9e-09	--	--	--	ens|ENSAPMP00000006909	pep:known group:AMEL2.0:GroupUn:27231574:27233927:1 gene:ENSAPMG00000003998 transcript:ENSAPMT00000006909	2e-15	11	M
SI.CL.7.cl.750.Contig1	gnl|Amel|GB14201-PA	4e-15	--	--	--	--	--	ens|ENSAPMP00000025465	pep:novel group:AMEL2.0:GroupUn:131202854:131203780:1 gene:ENSAPMG00000009020 transcript:ENSAPMT00000025465	2e-09	6	M
SiJWD09CAP.scf	gnl|Amel|GB18114-PA	5e-15	chr|NC_007085|NC_007085.2 Chromosome LG16; [Apis mellifera] gi:110825765 chromosome 16 complete sequence	3.6e-16	chr|AMe_AADG05010977|AMe_AADG05010977.1	Linkage group Un; [Apis mellifera] draft genome, Amel_4.0.	1e-05	--	--	--	--	M
SI.CL.3.cl.300.SiJWE06BDE2.scf	gnl|Amel|GB17021-PA	5e-15	chr|NC_007076|NC_007076.2 Chromosome LG7; [Apis mellifera] gi:110825771 chromosome 7 complete sequence	2.71e-09	--	--	--	tr|Q8T0Y0|Q8T0Y0_APICE	Mariner transposase.[Apis cerana]	3e-13	19	M
SI.CL.42.cl.4214.Contig1	gnl|Amel|GB10538-PA	5e-15	--	--	chr|AMe_AADG05007029|AMe_AADG05007029.1	Linkage group Un; [Apis mellifera] draft genome, Amel_4.0.	3e-12	--	--	--	--	M
SiJWH04BCW2.scf	gnl|Amel|GB17883-PA	6e-15	--	--	--	--	--	--	--	--	--	M
SiJWG12AAK.scf	gnl|Amel|GB10634-PA	1e-14	chr|NC_007085|NC_007085.2 Chromosome LG16; [Apis mellifera] gi:110825765 chromosome 16 complete sequence	3.13e-17	chr|AMe_AADG05005668|AMe_AADG05005668.1	Linkage group 16; [Apis mellifera] draft genome, Amel_4.0.	2e-13	--	--	--	--	M
SI.CL.10.cl.1075.Contig2	gnl|Amel|GB16295-PA	1e-14	chr|NC_007072|NC_007072.2 Chromosome LG3; [Apis mellifera] gi:110825767 chromosome 3 complete sequence	7.94e-16	--	--	--	ens|ENSAPMP00000008629	pep:known group:AMEL2.0:Group3:1531644:1532307:-1 gene:ENSAPMG00000004987 transcript:ENSAPMT00000008629	2e-13	6	M
SI.CL.2.cl.253.Contig1	gnl|Amel|GB16757-PA	1e-14	--	--	--	--	--	--	--	--	--	M
SI.CL.32.cl.3214.Contig1	gnl|Amel|GB18533-PA	2e-14	chr|NC_007071|NC_007071.2 Chromosome LG2; [Apis mellifera] gi:110825766 chromosome 2 complete sequence	7.87e-17	--	--	--	--	--	--	--	M
SI.CL.15.cl.1537.Contig2	gnl|Amel|GB17021-PA	3e-14	chr|NC_007076|NC_007076.2 Chromosome LG7; [Apis mellifera] gi:110825771 chromosome 7 complete sequence	5.06e-29	--	--	--	--	--	--	--	M
SiJWH12BBL.scf	gnl|Amel|GB18717-PA	3e-14	chr|NC_007083|NC_007083.2 Chromosome LG14; [Apis mellifera] gi:110825763 chromosome 14 complete sequence	5.8e-15	--	--	--	--	--	--	--	M
SiJWB03ABV.scf	gnl|Amel|GB10788-PA	3e-14	--	--	--	--	--	ens|ENSAPMP00000030318	pep:novel group:AMEL2.0:GroupUn:63397749:63398923:1 gene:ENSAPMG00000010075 transcript:ENSAPMT00000030318	1e-20	20	M
SI.CL.1.cl.125.Contig1	gnl|Amel|GB17749-PA	3e-14	--	--	--	--	--	--	--	--	--	M
SI.CL.2.cl.264.Contig1	gnl|Amel|GB10487-PA	4e-14	chr|NC_007082|NC_007082.2 Chromosome LG13; [Apis mellifera] gi:110825762 chromosome 13 complete sequence	2.64e-08	--	--	--	ens|ENSAPMP00000009498	pep:novel group:AMEL2.0:Group13:2117036:2118812:-1 gene:ENSAPMG00000017007 transcript:ENSAPMT00000009498	2e-10	4	M
SI.CL.22.cl.2215.Contig1	gnl|Amel|GB11160-PA	5e-14	--	--	chr|AMe_AADG05016496|AMe_AADG05016496.1	Linkage group Un; [Apis mellifera] draft genome, Amel_4.0.	4e-06	--	--	--	--	M
SiJWH01BBX.scf	gnl|Amel|GB14120-PA	6e-14	chr|NC_007073|NC_007073.2 Chromosome LG4; [Apis mellifera] gi:110825768 chromosome 4 complete sequence	4.36e-27	chr|AMe_AADG05001730|AMe_AADG05001730.1	Linkage group 4; [Apis mellifera] draft genome, Amel_4.0.	7e-10	--	--	--	--	M
SiJWA07AAS.scf	gnl|Amel|GB19987-PA	8e-14	chr|NC_007079|NC_007079.2 Chromosome LG10; [Apis mellifera] gi:110825711 chromosome 10 complete sequence	3.97e-18	--	--	--	--	--	--	--	M
SI.CL.1.cl.153.Contig1	gnl|Amel|GB15018-PA	8e-14	chr|NC_007084|NC_007084.2 Chromosome LG15; [Apis mellifera] gi:110825764 chromosome 15 complete sequence	3.05e-11	--	--	--	ens|ENSAPMP00000026266	pep:known group:AMEL2.0:Group15:3885061:3886106:-1 gene:ENSAPMG00000012912 transcript:ENSAPMT00000026267	5e-12	2	M
SI.CL.29.cl.2926.Contig1	gnl|Amel|GB12198-PA	2e-13	chr|NC_007078|NC_007078.2 Chromosome LG9; [Apis mellifera] gi:110825774 chromosome 9 complete sequence	1.32e-20	--	--	--	ens|ENSAPMP00000035624	pep:novel group:AMEL2.0:Group9:902427:919555:1 gene:ENSAPMG00000005653 transcript:ENSAPMT00000035624	5e-17	10	M
SI.CL.35.cl.3528.Contig1	gnl|Amel|GB14823-PA	2e-13	chr|NC_007075|NC_007075.2 Chromosome LG6; [Apis mellifera] gi:110825770 chromosome 6 complete sequence	1.57e-15	chr|AMe_AADG05002584|AMe_AADG05002584.1	Linkage group 6; [Apis mellifera] draft genome, Amel_4.0.	1e-16	ens|ENSAPMP00000004010	pep:known group:AMEL2.0:Group6:12839095:12850911:1 gene:ENSAPMG00000002327 transcript:ENSAPMT00000004010	2e-17	3	M
SiJWE05BBC2.scf	gnl|Amel|GB17021-PA	2e-13	chr|NC_007071|NC_007071.2 Chromosome LG2; [Apis mellifera] gi:110825766 chromosome 2 complete sequence	4.54e-06	--	--	--	--	--	--	--	M
SiJWH06AAY.scf	gnl|Amel|GB18360-PA	3e-13	chr|NC_007072|NC_007072.2 Chromosome LG3; [Apis mellifera] gi:110825767 chromosome 3 complete sequence	1.62e-15	--	--	--	--	--	--	--	M
SI.CL.5.cl.515.Contig1	gnl|Amel|GB17745-PA	3e-13	chr|NC_007077|NC_007077.2 Chromosome LG8; [Apis mellifera] gi:110825772 chromosome 8 complete sequence	2.03e-15	--	--	--	--	--	--	--	M
SiJWD04AAX.scf	gnl|Amel|GB17861-PA	3e-13	chr|NC_007073|NC_007073.2 Chromosome LG4; [Apis mellifera] gi:110825768 chromosome 4 complete sequence	1e-13	--	--	--	ens|ENSAPMP00000029609	pep:novel group:AMEL2.0:Group4:5878521:5879794:1 gene:ENSAPMG00000011981 transcript:ENSAPMT00000029611	1e-09	4	M
SI.CL.11.cl.1106.Contig1	gnl|Amel|GB13512-PA	3e-13	chr|NC_007070|NC_007070.2 Chromosome LG1; [Apis mellifera] gi:110825701 chromosome 1 complete sequence	1.83e-13	--	--	--	ens|ENSAPMP00000019539	pep:novel group:AMEL2.0:GroupUn:3899255:3899829:-1 gene:ENSAPMG00000004489 transcript:ENSAPMT00000019535	1e-21	5	M
SI.CL.4.cl.430.Contig2	gnl|Amel|GB15018-PA	3e-13	chr|NC_007084|NC_007084.2 Chromosome LG15; [Apis mellifera] gi:110825764 chromosome 15 complete sequence	1.67e-10	--	--	--	ens|ENSAPMP00000026266	pep:known group:AMEL2.0:Group15:3885061:3886106:-1 gene:ENSAPMG00000012912 transcript:ENSAPMT00000026267	3e-11	2	M
SiJWG03CAD.scf	gnl|Amel|GB13219-PA	5e-13	chr|NC_007084|NC_007084.2 Chromosome LG15; [Apis mellifera] gi:110825764 chromosome 15 complete sequence	9.97e-13	chr|AMe_AADG05008336|AMe_AADG05008336.1	Linkage group Un; [Apis mellifera] draft genome, Amel_4.0.	6e-32	--	--	--	--	M
SI.CL.30.cl.3028.Contig2	gnl|Amel|GB13758-PA	7e-13	chr|NC_007080|NC_007080.2 Chromosome LG11; [Apis mellifera] gi:110825732 chromosome 11 complete sequence	5.8e-15	chr|AMe_AADG05006676|AMe_AADG05006676.1	Linkage group Un; [Apis mellifera] draft genome, Amel_4.0.	2e-16	--	--	--	--	M
SI.CL.4.cl.430.SiJWH03BAB.scf	gnl|Amel|GB15018-PA	8e-13	chr|NC_007084|NC_007084.2 Chromosome LG15; [Apis mellifera] gi:110825764 chromosome 15 complete sequence	3.91e-06	--	--	--	ens|ENSAPMP00000033359	pep:novel group:AMEL2.0:Group16:1238165:1238573:1 gene:ENSAPMG00000016780 transcript:ENSAPMT00000033360	1e-11	2	M
SiJWH07AAY.scf	gnl|Amel|GB13442-PA	1e-12	chr|NC_007079|NC_007079.2 Chromosome LG10; [Apis mellifera] gi:110825711 chromosome 10 complete sequence	9.03e-89	chr|AMe_AADG05003737|AMe_AADG05003737.1	Linkage group 10; [Apis mellifera] draft genome, Amel_4.0.	3e-15	ens|ENSAPMP00000020907	pep:novel group:AMEL2.0:Group10:435907:436761:-1 gene:ENSAPMG00000015508 transcript:ENSAPMT00000020901	2e-49	5	M
SiJWD03CAR2.scf	gnl|Amel|GB12894-PA	1e-12	chr|NC_007072|NC_007072.2 Chromosome LG3; [Apis mellifera] gi:110825767 chromosome 3 complete sequence	3.09e-14	--	--	--	ens|ENSAPMP00000014767	pep:novel group:AMEL2.0:Group3:11161791:11163741:-1 gene:ENSAPMG00000008422 transcript:ENSAPMT00000014767	2e-08	3	M
SI.CL.16.cl.1633.Contig1	gnl|Amel|GB17021-PA	1e-12	chr|NC_007074|NC_007074.2 Chromosome LG5; [Apis mellifera] gi:110825769 chromosome 5 complete sequence	1.83e-12	--	--	--	--	--	--	--	M
SI.CL.4.cl.430.Contig1	gnl|Amel|GB15018-PA	1e-12	chr|NC_007084|NC_007084.2 Chromosome LG15; [Apis mellifera] gi:110825764 chromosome 15 complete sequence	6.52e-06	--	--	--	ens|ENSAPMP00000033359	pep:novel group:AMEL2.0:Group16:1238165:1238573:1 gene:ENSAPMG00000016780 transcript:ENSAPMT00000033360	1e-11	2	M
SI.CL.7.cl.750.Contig3	gnl|Amel|GB14201-PA	1e-12	--	--	--	--	--	ens|ENSAPMP00000034206	pep:novel group:AMEL2.0:GroupUn:131201101:131203780:1 gene:ENSAPMG00000009020 transcript:ENSAPMT00000034205	2e-12	6	M
SI.CL.27.cl.2728.Contig1	gnl|Amel|GB14124-PA	2e-12	chr|NC_007084|NC_007084.2 Chromosome LG15; [Apis mellifera] gi:110825764 chromosome 15 complete sequence	1.67e-32	--	--	--	ens|ENSAPMP00000029785	pep:novel group:AMEL2.0:GroupUn:31306156:31309926:1 gene:ENSAPMG00000013607 transcript:ENSAPMT00000029787	2e-10	2	M
SI.CL.4.cl.430.SiJWB05BDS2.scf	gnl|Amel|GB15018-PA	2e-12	chr|NC_007084|NC_007084.2 Chromosome LG15; [Apis mellifera] gi:110825764 chromosome 15 complete sequence	3.25e-06	--	--	--	ens|ENSAPMP00000033359	pep:novel group:AMEL2.0:Group16:1238165:1238573:1 gene:ENSAPMG00000016780 transcript:ENSAPMT00000033360	9e-12	2	M
SI.CL.4.cl.430.SiJWH08ADC.scf	gnl|Amel|GB15018-PA	2e-12	chr|NC_007084|NC_007084.2 Chromosome LG15; [Apis mellifera] gi:110825764 chromosome 15 complete sequence	8.1e-06	--	--	--	ens|ENSAPMP00000033359	pep:novel group:AMEL2.0:Group16:1238165:1238573:1 gene:ENSAPMG00000016780 transcript:ENSAPMT00000033360	2e-11	2	M
SiJWC10CAD.scf	gnl|Amel|GB20084-PA	2e-12	--	--	chr|AMe_AADG05008219|AMe_AADG05008219.1	Linkage group Un; [Apis mellifera] draft genome, Amel_4.0.	4e-08	--	--	--	--	M
SiJWD05BDT2.scf	gnl|Amel|GB17221-PA	2e-12	--	--	chr|AMe_AADG05013435|AMe_AADG05013435.1	Linkage group Un; [Apis mellifera] draft genome, Amel_4.0.	1e-05	ens|ENSAPMP00000013488	pep:novel group:AMEL2.0:GroupUn:240359938:240364015:1 gene:ENSAPMG00000007710 transcript:ENSAPMT00000013488	4e-10	19	M
SI.CL.11.cl.1121.Contig1	gnl|Amel|GB17614-PA	2e-12	--	--	--	--	--	ens|ENSAPMP00000027148	pep:novel group:AMEL2.0:GroupUn:196426410:196427535:1 gene:ENSAPMG00000010281 transcript:ENSAPMT00000027146	2e-10	6	M
SiJWE02ADN.scf	gnl|Amel|GB16124-PA	2e-12	--	--	--	--	--	ens|ENSAPMP00000023037	pep:novel group:AMEL2.0:GroupUn:147339337:147341120:-1 gene:ENSAPMG00000011926 transcript:ENSAPMT00000023033	1e-06	3	M
SI.CL.38.cl.3865.Contig1	gnl|Amel|GB11966-PA	2e-12	--	--	--	--	--	ens|ENSAPMP00000019666	pep:novel group:AMEL2.0:GroupUn:56179816:56187810:1 gene:ENSAPMG00000013406 transcript:ENSAPMT00000019662	2e-10	2	M
SI.CL.42.cl.4207.Contig1	gnl|Amel|GB10406-PA	2e-12	--	--	--	--	--	ens|ENSAPMP00000008532	pep:known group:AMEL2.0:GroupUn:30168270:30170387:1 gene:ENSAPMG00000004933 transcript:ENSAPMT00000008532	2e-10	6	M
SiJWF11BAR.scf	gnl|Amel|GB18114-PA	3e-12	chr|NC_007085|NC_007085.2 Chromosome LG16; [Apis mellifera] gi:110825765 chromosome 16 complete sequence	2.15e-16	chr|AMe_AADG05007424|AMe_AADG05007424.1	Linkage group 16; [Apis mellifera] draft genome, Amel_4.0.	3e-18	--	--	--	--	M
SiJWH09BAF.scf	gnl|Amel|GB10947-PA	3e-12	chr|NC_007073|NC_007073.2 Chromosome LG4; [Apis mellifera] gi:110825768 chromosome 4 complete sequence	7.01e-06	--	--	--	--	--	--	--	M
SI.CL.2.cl.230.SiJWC12BDN2.scf	gnl|Amel|GB17267-PA	3e-12	--	--	--	--	--	ens|ENSAPMP00000018003	pep:novel group:AMEL2.0:Group1:6448868:6450188:1 gene:ENSAPMG00000011769 transcript:ENSAPMT00000018002	5e-10	6	M
SI.CL.2.cl.230.Contig4	gnl|Amel|GB17267-PA	3e-12	--	--	--	--	--	ens|ENSAPMP00000018003	pep:novel group:AMEL2.0:Group1:6448868:6450188:1 gene:ENSAPMG00000011769 transcript:ENSAPMT00000018002	4e-10	6	M
SiJWD06ABW.scf	gnl|Amel|GB10419-PA	4e-12	chr|NC_007080|NC_007080.2 Chromosome LG11; [Apis mellifera] gi:110825732 chromosome 11 complete sequence	1.15e-07	--	--	--	ens|ENSAPMP00000029509	pep:novel group:AMEL2.0:Group9:4724539:4731489:-1 gene:ENSAPMG00000000192 transcript:ENSAPMT00000029511	2e-09	3	M
SI.CL.4.cl.430.SiJWB01BAS.scf	gnl|Amel|GB15018-PA	4e-12	chr|NC_007084|NC_007084.2 Chromosome LG15; [Apis mellifera] gi:110825764 chromosome 15 complete sequence	2.96e-06	--	--	--	ens|ENSAPMP00000033359	pep:novel group:AMEL2.0:Group16:1238165:1238573:1 gene:ENSAPMG00000016780 transcript:ENSAPMT00000033360	8e-12	2	M
SiJWG02BBM2.scf	gnl|Amel|GB12367-PA	4e-12	--	--	--	--	--	--	--	--	--	M
SI.CL.11.cl.1159.Contig1	gnl|Amel|GB15440-PA	5e-12	--	--	--	--	--	ens|ENSAPMP00000017346	pep:novel group:AMEL2.0:GroupUn:47175179:47177464:-1 gene:ENSAPMG00000007144 transcript:ENSAPMT00000017345	6e-10	4	M
SI.CL.16.cl.1644.Contig2	gnl|Amel|GB16225-PA	6e-12	chr|NC_007073|NC_007073.2 Chromosome LG4; [Apis mellifera] gi:110825768 chromosome 4 complete sequence	5.14e-19	chr|AMe_AADG05001803|AMe_AADG05001803.1	Linkage group 4; [Apis mellifera] draft genome, Amel_4.0.	3e-09	--	--	--	--	M
SI.CL.4.cl.430.SiJWH04ACE.scf	gnl|Amel|GB15018-PA	6e-12	chr|NC_007084|NC_007084.2 Chromosome LG15; [Apis mellifera] gi:110825764 chromosome 15 complete sequence	7.01e-06	--	--	--	ens|ENSAPMP00000033359	pep:novel group:AMEL2.0:Group16:1238165:1238573:1 gene:ENSAPMG00000016780 transcript:ENSAPMT00000033360	2e-11	2	M
SI.CL.4.cl.430.Contig3	gnl|Amel|GB15018-PA	7e-12	chr|NC_007084|NC_007084.2 Chromosome LG15; [Apis mellifera] gi:110825764 chromosome 15 complete sequence	1.77e-09	--	--	--	ens|ENSAPMP00000033359	pep:novel group:AMEL2.0:Group16:1238165:1238573:1 gene:ENSAPMG00000016780 transcript:ENSAPMT00000033360	8e-11	2	M
SiJWH11ACV.scf	gnl|Amel|GB10905-PA	9e-12	--	--	--	--	--	--	--	--	--	M
SiJWC12BCK2.scf	gnl|Amel|GB10537-PA	1e-11	chr|NC_007080|NC_007080.2 Chromosome LG11; [Apis mellifera] gi:110825732 chromosome 11 complete sequence	4.29e-14	--	--	--	--	--	--	--	M
SI.CL.4.cl.412.Contig1	gnl|Amel|GB16153-PA	1e-11	chr|NC_007074|NC_007074.2 Chromosome LG5; [Apis mellifera] gi:110825769 chromosome 5 complete sequence	2.09e-13	--	--	--	--	--	--	--	M
SI.CL.0.cl.009.Contig1	gnl|Amel|GB20149-PA	1e-11	chr|NC_007071|NC_007071.2 Chromosome LG2; [Apis mellifera] gi:110825766 chromosome 2 complete sequence	2.97e-07	--	--	--	--	--	--	--	M
SI.CL.20.cl.2035.SiJWF08ADA.scf	gnl|Amel|GB18848-PA	2e-11	chr|NC_007071|NC_007071.2 Chromosome LG2; [Apis mellifera] gi:110825766 chromosome 2 complete sequence	9.42e-22	--	--	--	--	--	--	--	M
SI.CL.9.cl.929.Contig1	gnl|Amel|GB14201-PA	2e-11	--	--	--	--	--	ens|ENSAPMP00000032520	pep:novel group:AMEL2.0:GroupUn:131203782:131204424:1 gene:ENSAPMG00000015410 transcript:ENSAPMT00000032520	3e-09	14	M
SiJWD06ADT.scf	gnl|Amel|GB18532-PA	3e-11	chr|NC_007084|NC_007084.2 Chromosome LG15; [Apis mellifera] gi:110825764 chromosome 15 complete sequence	1.07e-06	--	--	--	ens|ENSAPMP00000014060	pep:known group:AMEL2.0:GroupUn:77601132:77611356:-1 gene:ENSAPMG00000008027 transcript:ENSAPMT00000014060	4e-09	13	M
SiJWC03AAP.scf	gnl|Amel|GB18926-PA	3e-11	--	--	--	--	--	--	--	--	--	M
SI.CL.26.cl.2634.Contig1	gnl|Amel|GB13424-PA	5e-11	chr|NC_007084|NC_007084.2 Chromosome LG15; [Apis mellifera] gi:110825764 chromosome 15 complete sequence	2.41e-15	--	--	--	ens|ENSAPMP00000024612	pep:novel group:AMEL2.0:GroupUn:8041231:8044348:-1 gene:ENSAPMG00000000441 transcript:ENSAPMT00000024607	2e-11	10	M
SI.CL.33.cl.3344.SiJWE10BCW2.scf	gnl|Amel|GB12386-PA	7e-11	chr|NC_007072|NC_007072.2 Chromosome LG3; [Apis mellifera] gi:110825767 chromosome 3 complete sequence	1.99e-12	chr|AMe_AADG05001250|AMe_AADG05001250.1	Linkage group 3; [Apis mellifera] draft genome, Amel_4.0.	4e-08	ens|ENSAPMP00000029822	pep:novel group:AMEL2.0:GroupUn:177625243:177626570:1 gene:ENSAPMG00000016734 transcript:ENSAPMT00000029824	1e-18	15	M
SI.CL.22.cl.2216.Contig1	gnl|Amel|GB16452-PA	7e-11	--	--	chr|AMe_AADG05010080|AMe_AADG05010080.1	Linkage group Un; [Apis mellifera] draft genome, Amel_4.0.	4e-06	ens|ENSAPMP00000008333	pep:novel group:AMEL2.0:GroupUn:283714639:283717267:-1 gene:ENSAPMG00000004820 transcript:ENSAPMT00000008333	1e-08	4	M
SI.CL.4.cl.486.SiJWA09BDX.scf	gnl|Amel|GB17021-PA	8e-11	chr|NC_007085|NC_007085.2 Chromosome LG16; [Apis mellifera] gi:110825765 chromosome 16 complete sequence	6.39e-14	--	--	--	tr|Q8I8E9|Q8I8E9_APIME	Ammar1 transposase.[Apis mellifera]	6e-16	12	M
SiJWF02CAU2.scf	gnl|Amel|GB17021-PA	8e-11	chr|NC_007076|NC_007076.2 Chromosome LG7; [Apis mellifera] gi:110825771 chromosome 7 complete sequence	1.14e-12	--	--	--	tr|Q8I8E9|Q8I8E9_APIME	Ammar1 transposase.[Apis mellifera]	6e-12	19	M
SI.CL.12.cl.1286.Contig1	gnl|Amel|GB13791-PA	8e-11	--	--	--	--	--	--	--	--	--	M
SI.CL.15.cl.1561.SiJWF05BCJ2.scf	gnl|Amel|GB16842-PA	9e-11	--	--	chr|AMe_AADG05009752|AMe_AADG05009752.1	Linkage group Un; [Apis mellifera] draft genome, Amel_4.0.	6e-26	--	--	--	--	M
SI.CL.11.cl.1106.SiJWG03CAQ2.scf	gnl|Amel|GB13512-PA	1e-10	chr|NC_007070|NC_007070.2 Chromosome LG1; [Apis mellifera] gi:110825701 chromosome 1 complete sequence	7.37e-16	--	--	--	ens|ENSAPMP00000019539	pep:novel group:AMEL2.0:GroupUn:3899255:3899829:-1 gene:ENSAPMG00000004489 transcript:ENSAPMT00000019535	5e-10	5	M
SI.CL.27.cl.2759.Contig1	gnl|Amel|GB19973-PA	1e-10	--	--	chr|AMe_AADG05017399|AMe_AADG05017399.1	Linkage group Un; [Apis mellifera] draft genome, Amel_4.0.	4e-14	--	--	--	--	M
SiJWB07BCA2.scf	gnl|Amel|GB18864-PA	2e-10	chr|NC_007073|NC_007073.2 Chromosome LG4; [Apis mellifera] gi:110825768 chromosome 4 complete sequence	5.91e-13	--	--	--	--	--	--	--	M
SI.CL.21.cl.2140.SiJWB10ADN.scf	gnl|Amel|GB12198-PA	2e-10	chr|NC_007078|NC_007078.2 Chromosome LG9; [Apis mellifera] gi:110825774 chromosome 9 complete sequence	1.12e-11	--	--	--	ens|ENSAPMP00000022253	pep:novel group:AMEL2.0:Group9:912019:919093:1 gene:ENSAPMG00000005653 transcript:ENSAPMT00000022247	4e-08	2	M
SI.CL.2.cl.241.Contig1	gnl|Amel|GB13546-PA	2e-10	chr|NC_007070|NC_007070.2 Chromosome LG1; [Apis mellifera] gi:110825701 chromosome 1 complete sequence	1.92e-10	--	--	--	ens|ENSAPMP00000007587	pep:novel group:AMEL2.0:Group1:23994763:23995765:-1 gene:ENSAPMG00000004397 transcript:ENSAPMT00000007587	2e-08	9	M
SiJWB12ADC.scf	gnl|Amel|GB18737-PA	2e-10	chr|NC_007079|NC_007079.2 Chromosome LG10; [Apis mellifera] gi:110825711 chromosome 10 complete sequence	2.49e-07	--	--	--	ens|ENSAPMP00000025982	pep:known group:AMEL2.0:Group10:8486869:8490055:-1 gene:ENSAPMG00000003373 transcript:ENSAPMT00000025982	1e-07	2	M
SI.CL.43.cl.4315.Contig1	gnl|Amel|GB17608-PA	3e-10	chr|NC_007070|NC_007070.2 Chromosome LG1; [Apis mellifera] gi:110825701 chromosome 1 complete sequence	7.17e-22	chr|AMe_AADG05000487|AMe_AADG05000487.1	Linkage group 1; [Apis mellifera] draft genome, Amel_4.0.	9e-30	ens|ENSAPMP00000000007	pep:novel group:AMEL2.0:Group1:15141555:15168530:-1 gene:ENSAPMG00000000001 transcript:ENSAPMT00000000007	3e-08	14	M
SiJWF05ADQ.scf	gnl|Amel|GB10372-PA	3e-10	chr|NC_007074|NC_007074.2 Chromosome LG5; [Apis mellifera] gi:110825769 chromosome 5 complete sequence	3.14e-08	--	--	--	--	--	--	--	M
SiJWE04BDX.scf	gnl|Amel|GB11596-PA	3e-10	chr|NC_007081|NC_007081.2 Chromosome LG12; [Apis mellifera] gi:110825756 chromosome 12 complete sequence	1.31e-06	--	--	--	--	--	--	--	M
SI.CL.22.cl.2289.Contig1	gnl|Amel|GB19189-PA	3e-10	--	--	--	--	--	ens|ENSAPMP00000006266	pep:novel group:AMEL2.0:GroupUn:47182433:47183346:-1 gene:ENSAPMG00000003567 transcript:ENSAPMT00000006266	2e-08	3	M
SiJWC12ACT.scf	gnl|Amel|GB11652-PA	3e-10	--	--	--	--	--	--	--	--	--	M
SI.CL.14.cl.1445.Contig1	gnl|Amel|GB12937-PA	4e-10	chr|NC_007077|NC_007077.2 Chromosome LG8; [Apis mellifera] gi:110825772 chromosome 8 complete sequence	2.27e-14	chr|AMe_AADG05005753|AMe_AADG05005753.1	Linkage group 8; [Apis mellifera] draft genome, Amel_4.0.	4e-12	--	--	--	--	M
SI.CL.11.cl.1196.Contig1	gnl|Amel|GB10026-PA	5e-10	chr|NC_007078|NC_007078.2 Chromosome LG9; [Apis mellifera] gi:110825774 chromosome 9 complete sequence	4.38e-51	--	--	--	--	--	--	--	M
SI.CL.25.cl.2515.Contig1	gnl|Amel|GB11438-PA	5e-10	chr|NC_007080|NC_007080.2 Chromosome LG11; [Apis mellifera] gi:110825732 chromosome 11 complete sequence	1.73e-09	--	--	--	--	--	--	--	M
SiJWB11ABT.scf	gnl|Amel|GB12841-PA	5e-10	chr|NC_007075|NC_007075.2 Chromosome LG6; [Apis mellifera] gi:110825770 chromosome 6 complete sequence	8.55e-08	--	--	--	ens|ENSAPMP00000007617	pep:novel group:AMEL2.0:Group2:6220336:6220730:1 gene:ENSAPMG00000004412 transcript:ENSAPMT00000007617	6e-08	20	M
SI.CL.22.cl.2255.Contig1	gnl|Amel|GB19016-PA	7e-10	chr|NC_007070|NC_007070.2 Chromosome LG1; [Apis mellifera] gi:110825701 chromosome 1 complete sequence	3.11e-25	chr|AMe_AADG05005884|AMe_AADG05005884.1	Linkage group 1; [Apis mellifera] draft genome, Amel_4.0.	4e-12	--	--	--	--	M
SiJWA11AAL.scf	gnl|Amel|GB10850-PA	8e-10	chr|NC_007079|NC_007079.2 Chromosome LG10; [Apis mellifera] gi:110825711 chromosome 10 complete sequence	2.05e-13	--	--	--	--	--	--	--	M
SI.CL.23.cl.2380.Contig1	gnl|Amel|GB10857-PA	1e-09	chr|NC_007074|NC_007074.2 Chromosome LG5; [Apis mellifera] gi:110825769 chromosome 5 complete sequence	1.94e-07	--	--	--	ens|ENSAPMP00000004327	pep:known group:AMEL2.0:Group5:13278768:13279494:1 gene:ENSAPMG00000002483 transcript:ENSAPMT00000004327	4e-09	7	M
SiJWA01ADS.scf	gnl|Amel|GB17787-PA	1e-09	chr|NC_007073|NC_007073.2 Chromosome LG4; [Apis mellifera] gi:110825768 chromosome 4 complete sequence	3.83e-06	--	--	--	ens|ENSAPMP00000001504	pep:novel group:AMEL2.0:Group4:1460806:1461551:1 gene:ENSAPMG00000000892 transcript:ENSAPMT00000001504	4e-08	5	M
SiJWG09ABL.scf	gnl|Amel|GB18848-PA	2e-09	chr|NC_007084|NC_007084.2 Chromosome LG15; [Apis mellifera] gi:110825764 chromosome 15 complete sequence	5.18e-18	--	--	--	--	--	--	--	M
SiJWG09AAG.scf	gnl|Amel|GB13597-PA	2e-09	chr|NC_007077|NC_007077.2 Chromosome LG8; [Apis mellifera] gi:110825772 chromosome 8 complete sequence	1.03e-09	--	--	--	ens|ENSAPMP00000006905	pep:known group:AMEL2.0:Group5:8765700:8774937:-1 gene:ENSAPMG00000003995 transcript:ENSAPMT00000006905	2e-06	10	M
SiJWC09ACN.scf	gnl|Amel|GB11758-PA	3e-09	chr|NC_007071|NC_007071.2 Chromosome LG2; [Apis mellifera] gi:110825766 chromosome 2 complete sequence	7.97e-11	chr|AMe_AADG05001054|AMe_AADG05001054.1	Linkage group 2; [Apis mellifera] draft genome, Amel_4.0.	7e-13	ens|ENSAPMP00000015225	pep:known group:AMEL2.0:GroupUn:29702757:29703912:1 gene:ENSAPMG00000008696 transcript:ENSAPMT00000015225	1e-07	3	M
SiJWE03BCK2.scf	gnl|Amel|GB15901-PA	3e-09	chr|NC_007080|NC_007080.2 Chromosome LG11; [Apis mellifera] gi:110825732 chromosome 11 complete sequence	3.06e-10	--	--	--	--	--	--	--	M
SI.CL.9.cl.942.SiJWG03ADZ.scf	gnl|Amel|GB16815-PA	3e-09	--	--	--	--	--	ens|ENSAPMP00000034093	pep:novel group:AMEL2.0:GroupUn:278160590:278161807:1 gene:ENSAPMG00000017001 transcript:ENSAPMT00000034092	5e-07	12	M
SI.CL.31.cl.3185.SiJWA08BBU.scf	gnl|Amel|GB17785-PA	4e-09	chr|NC_007074|NC_007074.2 Chromosome LG5; [Apis mellifera] gi:110825769 chromosome 5 complete sequence	1.75e-10	chr|AMe_AADG05002206|AMe_AADG05002206.1	Linkage group 5; [Apis mellifera] draft genome, Amel_4.0.	4e-29	--	--	--	--	M
SiJWG12BBU.scf	gnl|Amel|GB11669-PA	4e-09	--	--	--	--	--	ens|ENSAPMP00000009215	pep:novel group:AMEL2.0:Group4:656885:657395:1 gene:ENSAPMG00000005313 transcript:ENSAPMT00000009215	1e-06	7	M
SI.CL.9.cl.942.SiJWC09ADD.scf	gnl|Amel|GB16815-PA	4e-09	--	--	--	--	--	ens|ENSAPMP00000034093	pep:novel group:AMEL2.0:GroupUn:278160590:278161807:1 gene:ENSAPMG00000017001 transcript:ENSAPMT00000034092	8e-07	11	M
SI.CL.9.cl.942.Contig1	gnl|Amel|GB16815-PA	4e-09	--	--	--	--	--	ens|ENSAPMP00000034093	pep:novel group:AMEL2.0:GroupUn:278160590:278161807:1 gene:ENSAPMG00000017001 transcript:ENSAPMT00000034092	5e-07	11	M
SI.CL.9.cl.942.SiJWH10ACR.scf	gnl|Amel|GB16815-PA	4e-09	--	--	--	--	--	ens|ENSAPMP00000034093	pep:novel group:AMEL2.0:GroupUn:278160590:278161807:1 gene:ENSAPMG00000017001 transcript:ENSAPMT00000034092	8e-07	10	M
SI.CL.5.cl.523.SiJWF06ADI.scf	gnl|Amel|GB18045-PA	5e-09	--	--	--	--	--	--	--	--	--	M
SiJWA01AAP.scf	gnl|Amel|GB19563-PA	9e-09	chr|NC_007082|NC_007082.2 Chromosome LG13; [Apis mellifera] gi:110825762 chromosome 13 complete sequence	1.14e-15	--	--	--	ens|ENSAPMP00000000664	pep:novel group:AMEL2.0:GroupUn:69944029:69944687:-1 gene:ENSAPMG00000000410 transcript:ENSAPMT00000000664	2e-12	2	M
SiJWE11ABS.scf	gnl|Amel|GB17021-PA	1e-08	chr|NC_007076|NC_007076.2 Chromosome LG7; [Apis mellifera] gi:110825771 chromosome 7 complete sequence	4.22e-07	--	--	--	tr|Q8T0Y0|Q8T0Y0_APICE	Mariner transposase.[Apis cerana]	1e-06	3	M
SiJWD09ABR.scf	gnl|Amel|GB19317-PA	1e-08	--	--	--	--	--	--	--	--	--	M
SI.CL.9.cl.934.Contig1	gnl|Amel|GB16883-PA	2e-08	chr|NC_007077|NC_007077.2 Chromosome LG8; [Apis mellifera] gi:110825772 chromosome 8 complete sequence	4.14e-09	--	--	--	ens|ENSAPMP00000014931	pep:known group:AMEL2.0:Group8:1579908:1590715:1 gene:ENSAPMG00000008526 transcript:ENSAPMT00000014931	3e-06	3	M
SI.CL.13.cl.1330.Contig1	gnl|Amel|GB18712-PA	2e-08	--	--	--	--	--	--	--	--	--	M
SiJWH12CAL2.scf	gnl|Amel|GB16026-PA	3e-08	chr|NC_007083|NC_007083.2 Chromosome LG14; [Apis mellifera] gi:110825763 chromosome 14 complete sequence	2.55e-35	chr|AMe_AADG05005132|AMe_AADG05005132.1	Linkage group 14; [Apis mellifera] draft genome, Amel_4.0.	8e-13	--	--	--	--	M
SiJWH05BAF.scf	gnl|Amel|GB18193-PA	3e-08	chr|NC_007083|NC_007083.2 Chromosome LG14; [Apis mellifera] gi:110825763 chromosome 14 complete sequence	6.44e-09	--	--	--	ens|ENSAPMP00000018402	pep:novel group:AMEL2.0:Group14:7119510:7121307:-1 gene:ENSAPMG00000011345 transcript:ENSAPMT00000018400	6e-06	9	M
SI.CL.6.cl.692.Contig1	gnl|Amel|GB14982-PA	3e-08	chr|NC_007084|NC_007084.2 Chromosome LG15; [Apis mellifera] gi:110825764 chromosome 15 complete sequence	2.1e-07	--	--	--	--	--	--	--	M
SI.CL.7.cl.765.Contig1	gnl|Amel|GB11969-PA	3e-08	--	--	--	--	--	ens|ENSAPMP00000012422	pep:novel group:AMEL2.0:GroupUn:91707147:91709240:1 gene:ENSAPMG00000007123 transcript:ENSAPMT00000012422	3e-06	2	M
SI.CL.28.cl.2836.SiJWC04AAG.scf	gnl|Amel|GB14176-PA	3e-08	--	--	--	--	--	--	--	--	--	M
SiJWF08BAI.scf	gnl|Amel|GB12210-PA	3e-08	--	--	--	--	--	--	--	--	--	M
SI.CL.2.cl.247.Contig1	gnl|Amel|GB12210-PA	3e-08	--	--	--	--	--	--	--	--	--	M
SI.CL.8.cl.815.Contig1	gnl|Amel|GB17021-PA	1e-07	chr|NC_007076|NC_007076.2 Chromosome LG7; [Apis mellifera] gi:110825771 chromosome 7 complete sequence	2.35e-13	chr|AMe_AADG05017568|AMe_AADG05017568.1	Linkage group Un; [Apis mellifera] draft genome, Amel_4.0.	9e-06	tr|Q8I8E9|Q8I8E9_APIME	Ammar1 transposase.[Apis mellifera]	4e-19	5	M
SiJWB02AAW.scf	gnl|Amel|GB12745-PA	1e-07	--	--	--	--	--	--	--	--	--	M
SI.CL.42.cl.4215.Contig1	gnl|Amel|GB16432-PA	2e-07	chr|NC_007080|NC_007080.2 Chromosome LG11; [Apis mellifera] gi:110825732 chromosome 11 complete sequence	3.77e-16	chr|AMe_AADG05004433|AMe_AADG05004433.1	Linkage group 11; [Apis mellifera] draft genome, Amel_4.0.	6e-06	--	--	--	--	M
SI.CL.4.cl.463.Contig3	gnl|Amel|GB17021-PA	2e-07	chr|NC_007076|NC_007076.2 Chromosome LG7; [Apis mellifera] gi:110825771 chromosome 7 complete sequence	5.98e-06	--	--	--	tr|Q8T0Y0|Q8T0Y0_APICE	Mariner transposase.[Apis cerana]	8e-06	17	M
SI.CL.31.cl.3119.Contig1	gnl|Amel|GB20072-PA	3e-07	chr|NC_007070|NC_007070.2 Chromosome LG1; [Apis mellifera] gi:110825701 chromosome 1 complete sequence	1.31e-09	--	--	--	--	--	--	--	M
SI.CL.36.cl.3615.Contig1	gnl|Amel|GB16239-PA	3e-07	--	--	--	--	--	--	--	--	--	M
SI.CL.33.cl.3319.Contig1	gnl|Amel|GB19102-PA	4e-07	chr|NC_007074|NC_007074.2 Chromosome LG5; [Apis mellifera] gi:110825769 chromosome 5 complete sequence	4.7e-20	--	--	--	--	--	--	--	M
SI.CL.42.cl.4242.Contig1	gnl|Amel|GB19226-PA	4e-07	--	--	--	--	--	--	--	--	--	M
SiJWA09CAB.scf	gnl|Amel|GB13770-PA	4e-07	--	--	--	--	--	--	--	--	--	M
SI.CL.3.cl.300.Contig1	gnl|Amel|GB17021-PA	5e-07	chr|NC_007071|NC_007071.2 Chromosome LG2; [Apis mellifera] gi:110825766 chromosome 2 complete sequence	3.72e-06	--	--	--	--	--	--	--	M
SiJWC06ADJ.scf	gnl|Amel|GB10419-PA	5e-07	--	--	--	--	--	--	--	--	--	M
SI.CL.33.cl.3378.Contig1	gnl|Amel|GB17021-PA	6e-07	chr|NC_007076|NC_007076.2 Chromosome LG7; [Apis mellifera] gi:110825771 chromosome 7 complete sequence	8.95e-14	--	--	--	--	--	--	--	M
SI.CL.7.cl.754.Contig1	gnl|Amel|GB18871-PA	6e-07	--	--	--	--	--	--	--	--	--	M
SiJWD11ADQ.scf	gnl|Amel|GB17021-PA	9e-07	chr|NC_007071|NC_007071.2 Chromosome LG2; [Apis mellifera] gi:110825766 chromosome 2 complete sequence	9.38e-14	--	--	--	--	--	--	--	M
SI.CL.5.cl.565.Contig1	gnl|Amel|GB12139-PA	1e-06	chr|NC_007070|NC_007070.2 Chromosome LG1; [Apis mellifera] gi:110825701 chromosome 1 complete sequence	4.18e-17	--	--	--	--	--	--	--	M
SiJWF12CAX.scf	gnl|Amel|GB13481-PA	1e-06	chr|NC_007072|NC_007072.2 Chromosome LG3; [Apis mellifera] gi:110825767 chromosome 3 complete sequence	8.64e-08	--	--	--	--	--	--	--	M
SiJWB03AAH.scf	gnl|Amel|GB14580-PA	1e-06	chr|NC_007071|NC_007071.2 Chromosome LG2; [Apis mellifera] gi:110825766 chromosome 2 complete sequence	2.36e-07	--	--	--	--	--	--	--	M
SI.CL.19.cl.1926.Contig1	gnl|Amel|GB15018-PA	1e-06	--	--	--	--	--	--	--	--	--	M
SI.CL.2.cl.296.SiJWF01BCG1.scf	gnl|Amel|GB13920-PA	2e-06	chr|NC_007070|NC_007070.2 Chromosome LG1; [Apis mellifera] gi:110825701 chromosome 1 complete sequence	6.44e-23	--	--	--	--	--	--	--	M
SiJWD04ABB.scf	gnl|Amel|GB11973-PA	2e-06	chr|NC_007085|NC_007085.2 Chromosome LG16; [Apis mellifera] gi:110825765 chromosome 16 complete sequence	1.76e-07	--	--	--	--	--	--	--	M
SI.CL.24.cl.2430.Contig1	gnl|Amel|GB13465-PA	2e-06	chr|NC_007072|NC_007072.2 Chromosome LG3; [Apis mellifera] gi:110825767 chromosome 3 complete sequence	3.95e-07	--	--	--	--	--	--	--	M
SiJWH12BBD2.scf	gnl|Amel|GB17021-PA	2e-06	--	--	--	--	--	--	--	--	--	M
SI.CL.2.cl.296.Contig2	gnl|Amel|GB13920-PA	3e-06	chr|NC_007070|NC_007070.2 Chromosome LG1; [Apis mellifera] gi:110825701 chromosome 1 complete sequence	4.42e-23	--	--	--	--	--	--	--	M
SI.CL.2.cl.296.Contig1	gnl|Amel|GB13920-PA	3e-06	chr|NC_007070|NC_007070.2 Chromosome LG1; [Apis mellifera] gi:110825701 chromosome 1 complete sequence	4.45e-23	--	--	--	--	--	--	--	M
SI.CL.2.cl.296.SiJWE04BDA2.scf	gnl|Amel|GB13920-PA	3e-06	chr|NC_007070|NC_007070.2 Chromosome LG1; [Apis mellifera] gi:110825701 chromosome 1 complete sequence	6.67e-23	--	--	--	--	--	--	--	M
SI.CL.15.cl.1537.Contig3	gnl|Amel|GB17021-PA	3e-06	chr|NC_007076|NC_007076.2 Chromosome LG7; [Apis mellifera] gi:110825771 chromosome 7 complete sequence	1.43e-10	--	--	--	--	--	--	--	M
SiJWC01BAZ2.scf	gnl|Amel|GB17021-PA	3e-06	chr|NC_007071|NC_007071.2 Chromosome LG2; [Apis mellifera] gi:110825766 chromosome 2 complete sequence	1.85e-06	--	--	--	--	--	--	--	M
SiJWH05BAM.scf	gnl|Amel|GB18925-PA	3e-06	--	--	--	--	--	--	--	--	--	M
SiJWF04BBP.scf	gnl|Amel|GB10086-PA	4e-06	chr|NC_007071|NC_007071.2 Chromosome LG2; [Apis mellifera] gi:110825766 chromosome 2 complete sequence	5.62e-10	chr|AMe_AADG05000887|AMe_AADG05000887.1	Linkage group 2; [Apis mellifera] draft genome, Amel_4.0.	7e-16	--	--	--	--	M
SI.CL.4.cl.412.SiJWF06ADC.scf	gnl|Amel|GB16153-PA	4e-06	--	--	--	--	--	--	--	--	--	M
SI.CL.2.cl.296.SiJWF06AAF2.scf	gnl|Amel|GB13920-PA	5e-06	chr|NC_007070|NC_007070.2 Chromosome LG1; [Apis mellifera] gi:110825701 chromosome 1 complete sequence	1.88e-21	--	--	--	--	--	--	--	M
SI.CL.31.cl.3168.Contig1	gnl|Amel|GB18363-PA	5e-06	--	--	--	--	--	--	--	--	--	M
SI.CL.29.cl.2929.Contig1	gnl|Amel|GB11247-PA	5e-06	--	--	--	--	--	--	--	--	--	M
SiJWD03CAI2.scf	gnl|Amel|GB13786-PA	6e-06	--	--	--	--	--	--	--	--	--	M
SI.CL.30.cl.3010.Contig1	gnl|Amel|GB17247-PA	7e-06	chr|NC_007082|NC_007082.2 Chromosome LG13; [Apis mellifera] gi:110825762 chromosome 13 complete sequence	1.64e-07	--	--	--	--	--	--	--	M
SiJWE08AAO.scf	gnl|Amel|GB12303-PA	9e-06	--	--	--	--	--	--	--	--	--	M
SiJWF01CAO2.scf	--	--	chr|NC_007080|NC_007080.2 Chromosome LG11; [Apis mellifera] gi:110825732 chromosome 11 complete sequence	2.02e-97	chr|AMe_AADG05004101|AMe_AADG05004101.1	Linkage group 11; [Apis mellifera] draft genome, Amel_4.0.	3e-09	--	--	--	--	M
SiJWD10BDQ.scf	--	--	chr|NC_007070|NC_007070.2 Chromosome LG1; [Apis mellifera] gi:110825701 chromosome 1 complete sequence	4.72e-71	--	--	--	ens|ENSAPMP00000012024	pep:novel group:AMEL2.0:Group1:2346843:2354182:1 gene:ENSAPMG00000006901 transcript:ENSAPMT00000012024	2e-58	5	M
SiJWB04BCK2.scf	--	--	chr|NC_007070|NC_007070.2 Chromosome LG1; [Apis mellifera] gi:110825701 chromosome 1 complete sequence	1.33e-69	chr|AMe_AADG05006469|AMe_AADG05006469.1	Linkage group 1; [Apis mellifera] draft genome, Amel_4.0.	7e-13	--	--	--	--	M
SI.CL.24.cl.2440.Contig1	--	--	chr|NC_007070|NC_007070.2 Chromosome LG1; [Apis mellifera] gi:110825701 chromosome 1 complete sequence	2.98e-60	--	--	--	--	--	--	--	M
SI.CL.8.cl.850.Contig1	--	--	chr|NC_007079|NC_007079.2 Chromosome LG10; [Apis mellifera] gi:110825711 chromosome 10 complete sequence	5.37e-58	chr|AMe_AADG05004014|AMe_AADG05004014.1	Linkage group 10; [Apis mellifera] draft genome, Amel_4.0.	1e-20	--	--	--	--	M
SI.CL.14.cl.1419.Contig1	--	--	chr|NC_007073|NC_007073.2 Chromosome LG4; [Apis mellifera] gi:110825768 chromosome 4 complete sequence	6.01e-54	chr|AMe_AADG05001759|AMe_AADG05001759.1	Linkage group 4; [Apis mellifera] draft genome, Amel_4.0.	3e-08	--	--	--	--	M
SiJWF07BDR2.scf	--	--	chr|NC_007076|NC_007076.2 Chromosome LG7; [Apis mellifera] gi:110825771 chromosome 7 complete sequence	1.71e-51	chr|AMe_AADG05002759|AMe_AADG05002759.1	Linkage group 7; [Apis mellifera] draft genome, Amel_4.0.	7e-07	--	--	--	--	M
SI.CL.22.cl.2213.Contig3	--	--	chr|NC_001566|NC_001566.1 Chromosome Mt; [Apis mellifera] gi:5834925, complete sequence mitochondrion, complete genome	2.39e-51	chr|AMe_AADG05001730|AMe_AADG05001730.1	Linkage group 4; [Apis mellifera] draft genome, Amel_4.0.	1e-05	--	--	--	--	M
SI.CL.22.cl.2213.Contig1	--	--	chr|NC_001566|NC_001566.1 Chromosome Mt; [Apis mellifera] gi:5834925, complete sequence mitochondrion, complete genome	3.39e-44	--	--	--	--	--	--	--	M
SI.CL.22.cl.2213.SiJWE07ADJ.scf	--	--	chr|NC_001566|NC_001566.1 Chromosome Mt; [Apis mellifera] gi:5834925, complete sequence mitochondrion, complete genome	3.86e-44	--	--	--	--	--	--	--	M
SI.CL.0.cl.017.Contig2	--	--	chr|NC_001566|NC_001566.1 Chromosome Mt; [Apis mellifera] gi:5834925, complete sequence mitochondrion, complete genome	4.11e-43	--	--	--	--	--	--	--	M
SiJWH11BAP.scf	--	--	chr|NC_007083|NC_007083.2 Chromosome LG14; [Apis mellifera] gi:110825763 chromosome 14 complete sequence	2.94e-41	--	--	--	--	--	--	--	M
SiJWG01BDX.scf	--	--	chr|NC_007075|NC_007075.2 Chromosome LG6; [Apis mellifera] gi:110825770 chromosome 6 complete sequence	7.1e-41	chr|AMe_AADG05006552|AMe_AADG05006552.1	Linkage group 6; [Apis mellifera] draft genome, Amel_4.0.	3e-06	--	--	--	--	M
SI.CL.26.cl.2603.Contig1	--	--	chr|NC_007079|NC_007079.2 Chromosome LG10; [Apis mellifera] gi:110825711 chromosome 10 complete sequence	2.04e-36	--	--	--	--	--	--	--	M
SI.CL.0.cl.017.Contig1	--	--	chr|NC_001566|NC_001566.1 Chromosome Mt; [Apis mellifera] gi:5834925, complete sequence mitochondrion, complete genome	1.27e-35	chr|AMe_AADG05002489|AMe_AADG05002489.1	Linkage group 6; [Apis mellifera] draft genome, Amel_4.0.	2e-06	--	--	--	--	M
SiJWF11ACL.scf	--	--	chr|NC_007073|NC_007073.2 Chromosome LG4; [Apis mellifera] gi:110825768 chromosome 4 complete sequence	3.42e-35	--	--	--	--	--	--	--	M
SiJWF03BDI2.scf	--	--	chr|NC_007084|NC_007084.2 Chromosome LG15; [Apis mellifera] gi:110825764 chromosome 15 complete sequence	5.04e-34	--	--	--	--	--	--	--	M
SiJWH09CAL2.scf	--	--	chr|NC_007072|NC_007072.2 Chromosome LG3; [Apis mellifera] gi:110825767 chromosome 3 complete sequence	2.66e-31	chr|AMe_AADG05005749|AMe_AADG05005749.1	Linkage group 3; [Apis mellifera] draft genome, Amel_4.0.	6e-69	--	--	--	--	M
SI.CL.1.cl.116.Contig2	--	--	chr|NC_007077|NC_007077.2 Chromosome LG8; [Apis mellifera] gi:110825772 chromosome 8 complete sequence	3.9e-30	--	--	--	--	--	--	--	M
SiJWG10ABC.scf	--	--	chr|NC_007079|NC_007079.2 Chromosome LG10; [Apis mellifera] gi:110825711 chromosome 10 complete sequence	9.33e-30	--	--	--	--	--	--	--	M
SI.CL.15.cl.1572.Contig1	--	--	chr|NC_007071|NC_007071.2 Chromosome LG2; [Apis mellifera] gi:110825766 chromosome 2 complete sequence	1.94e-28	chr|AMe_AADG05000966|AMe_AADG05000966.1	Linkage group 2; [Apis mellifera] draft genome, Amel_4.0.	7e-07	--	--	--	--	M
SiJWD02ACW.scf	--	--	chr|NC_007070|NC_007070.2 Chromosome LG1; [Apis mellifera] gi:110825701 chromosome 1 complete sequence	4.08e-27	--	--	--	--	--	--	--	M
SiJWA04BDW.scf	--	--	chr|NC_007076|NC_007076.2 Chromosome LG7; [Apis mellifera] gi:110825771 chromosome 7 complete sequence	7.18e-27	chr|AMe_AADG05002860|AMe_AADG05002860.1	Linkage group 7; [Apis mellifera] draft genome, Amel_4.0.	3e-18	--	--	--	--	M
SiJWD05ACT.scf	--	--	chr|NC_007082|NC_007082.2 Chromosome LG13; [Apis mellifera] gi:110825762 chromosome 13 complete sequence	1.28e-24	chr|AMe_AADG05004820|AMe_AADG05004820.1	Linkage group 13; [Apis mellifera] draft genome, Amel_4.0.	4e-11	--	--	--	--	M
SI.CL.33.cl.3376.Contig1	--	--	chr|NC_007074|NC_007074.2 Chromosome LG5; [Apis mellifera] gi:110825769 chromosome 5 complete sequence	2.26e-23	chr|AMe_AADG05005401|AMe_AADG05005401.1	Linkage group 15; [Apis mellifera] draft genome, Amel_4.0.	4e-10	--	--	--	--	M
SiJWG10BCK2.scf	--	--	chr|NC_001566|NC_001566.1 Chromosome Mt; [Apis mellifera] gi:5834925, complete sequence mitochondrion, complete genome	1.68e-22	--	--	--	sp|P34855|NU5M_APILI	(ND5)NADH-ubiquinone oxidoreductase chain 5 (EC 1.6.5.3) (NADH dehydrogenase subunit 5).[Apis mellifera ligustica]	5e-18	7	M
SI.CL.9.cl.976.Contig1	--	--	chr|NC_007078|NC_007078.2 Chromosome LG9; [Apis mellifera] gi:110825774 chromosome 9 complete sequence	5.26e-22	--	--	--	--	--	--	--	M
SI.CL.35.cl.3517.Contig1	--	--	chr|NC_007077|NC_007077.2 Chromosome LG8; [Apis mellifera] gi:110825772 chromosome 8 complete sequence	1.33e-17	--	--	--	ens|ENSAPMP00000035915	pep:novel group:AMEL2.0:GroupUn:297222220:297222573:1 gene:ENSAPMG00000016144 transcript:ENSAPMT00000035915	2e-15	6	M
SiJWH08ADA.scf	--	--	chr|NC_007076|NC_007076.2 Chromosome LG7; [Apis mellifera] gi:110825771 chromosome 7 complete sequence	1.64e-17	--	--	--	--	--	--	--	M
SiJWE05ACH.scf	--	--	chr|NC_007077|NC_007077.2 Chromosome LG8; [Apis mellifera] gi:110825772 chromosome 8 complete sequence	2.47e-16	--	--	--	--	--	--	--	M
SI.CL.18.cl.1860.Contig1	--	--	chr|NC_007074|NC_007074.2 Chromosome LG5; [Apis mellifera] gi:110825769 chromosome 5 complete sequence	4.85e-15	chr|AMe_AADG05001997|AMe_AADG05001997.1	Linkage group 5; [Apis mellifera] draft genome, Amel_4.0.	3e-08	--	--	--	--	M
SI.CL.17.cl.1794.Contig1	--	--	chr|NC_007083|NC_007083.2 Chromosome LG14; [Apis mellifera] gi:110825763 chromosome 14 complete sequence	1.51e-13	--	--	--	--	--	--	--	M
SI.CL.3.cl.377.Contig1	--	--	chr|NC_007076|NC_007076.2 Chromosome LG7; [Apis mellifera] gi:110825771 chromosome 7 complete sequence	1.68e-13	--	--	--	--	--	--	--	M
SI.CL.4.cl.430.SiJWG01AEA.scf	--	--	chr|NC_007084|NC_007084.2 Chromosome LG15; [Apis mellifera] gi:110825764 chromosome 15 complete sequence	2.84e-12	--	--	--	--	--	--	--	M
SiJWH05CAW.scf	--	--	chr|NC_007070|NC_007070.2 Chromosome LG1; [Apis mellifera] gi:110825701 chromosome 1 complete sequence	4.13e-12	--	--	--	--	--	--	--	M
SI.CL.40.cl.4044.Contig1	--	--	chr|NC_007081|NC_007081.2 Chromosome LG12; [Apis mellifera] gi:110825756 chromosome 12 complete sequence	1.88e-11	--	--	--	--	--	--	--	M
SI.CL.29.cl.2905.Contig1	--	--	chr|NC_007070|NC_007070.2 Chromosome LG1; [Apis mellifera] gi:110825701 chromosome 1 complete sequence	2.64e-11	--	--	--	--	--	--	--	M
SI.CL.6.cl.654.SiJWA04AAT.scf	--	--	chr|NC_007085|NC_007085.2 Chromosome LG16; [Apis mellifera] gi:110825765 chromosome 16 complete sequence	1.75e-10	--	--	--	--	--	--	--	M
SiJWC08ABY.scf	--	--	chr|NC_007082|NC_007082.2 Chromosome LG13; [Apis mellifera] gi:110825762 chromosome 13 complete sequence	1.35e-09	--	--	--	--	--	--	--	M
SiJWA10BCR.scf	--	--	chr|NC_007079|NC_007079.2 Chromosome LG10; [Apis mellifera] gi:110825711 chromosome 10 complete sequence	9.93e-09	--	--	--	--	--	--	--	M
SiJWD05ABX.scf	--	--	chr|NC_007082|NC_007082.2 Chromosome LG13; [Apis mellifera] gi:110825762 chromosome 13 complete sequence	1.21e-08	--	--	--	--	--	--	--	M
SiJWH08ABI.scf	--	--	chr|NC_007075|NC_007075.2 Chromosome LG6; [Apis mellifera] gi:110825770 chromosome 6 complete sequence	5.01e-08	--	--	--	--	--	--	--	M
SI.CL.4.cl.499.Contig1	--	--	chr|NC_001566|NC_001566.1 Chromosome Mt; [Apis mellifera] gi:5834925, complete sequence mitochondrion, complete genome	5.71e-08	--	--	--	--	--	--	--	M
SI.CL.15.cl.1500.Contig1	--	--	chr|NC_007074|NC_007074.2 Chromosome LG5; [Apis mellifera] gi:110825769 chromosome 5 complete sequence	9.41e-08	--	--	--	--	--	--	--	M
SiJWH05ADF.scf	--	--	chr|NC_007080|NC_007080.2 Chromosome LG11; [Apis mellifera] gi:110825732 chromosome 11 complete sequence	1.61e-07	--	--	--	--	--	--	--	M
SI.CL.4.cl.499.SiJWG11AAM.scf	--	--	chr|NC_001566|NC_001566.1 Chromosome Mt; [Apis mellifera] gi:5834925, complete sequence mitochondrion, complete genome	4.84e-07	--	--	--	--	--	--	--	M
SI.CL.38.cl.3856.Contig1	--	--	chr|NC_007080|NC_007080.2 Chromosome LG11; [Apis mellifera] gi:110825732 chromosome 11 complete sequence	8.32e-07	--	--	--	--	--	--	--	M
SI.CL.0.cl.037.SiJWH03BDO2.scf	--	--	chr|NC_001566|NC_001566.1 Chromosome Mt; [Apis mellifera] gi:5834925, complete sequence mitochondrion, complete genome	1.54e-06	chr|AMe_AADG05015066|AMe_AADG05015066.1	Linkage group Un; [Apis mellifera] draft genome, Amel_4.0.	1e-05	--	--	--	--	M
SI.CL.36.cl.3635.Contig1	--	--	chr|NC_007075|NC_007075.2 Chromosome LG6; [Apis mellifera] gi:110825770 chromosome 6 complete sequence	2.43e-06	--	--	--	--	--	--	--	M
SI.CL.38.cl.3859.Contig1	--	--	chr|NC_007074|NC_007074.2 Chromosome LG5; [Apis mellifera] gi:110825769 chromosome 5 complete sequence	2.98e-06	--	--	--	--	--	--	--	M
SI.CL.13.cl.1352.Contig1	--	--	chr|NC_007075|NC_007075.2 Chromosome LG6; [Apis mellifera] gi:110825770 chromosome 6 complete sequence	8.95e-06	--	--	--	--	--	--	--	M
SI.CL.4.cl.485.Contig2	--	--	--	--	chr|AMe_AADG05007704|AMe_AADG05007704.1	Linkage group Un; [Apis mellifera] draft genome, Amel_4.0.	7e-90	--	--	--	--	M
SI.CL.4.cl.433.Contig2	--	--	--	--	chr|AMe_AADG05013938|AMe_AADG05013938.1	Linkage group Un; [Apis mellifera] draft genome, Amel_4.0.	2e-83	--	--	--	--	M
SI.CL.4.cl.485.SiJWF03ADG.scf	--	--	--	--	chr|AMe_AADG05007704|AMe_AADG05007704.1	Linkage group Un; [Apis mellifera] draft genome, Amel_4.0.	1e-57	--	--	--	--	M
SI.CL.22.cl.2200.Contig1	--	--	--	--	chr|AMe_AADG05016764|AMe_AADG05016764.1	Linkage group Un; [Apis mellifera] draft genome, Amel_4.0.	6e-29	--	--	--	--	M
SiJWA06ABL.scf	--	--	--	--	chr|AMe_AADG05007682|AMe_AADG05007682.1	Linkage group Un; [Apis mellifera] draft genome, Amel_4.0.	4e-26	--	--	--	--	M
SI.CL.6.cl.650.Contig1	--	--	--	--	chr|AMe_AADG05017260|AMe_AADG05017260.1	Linkage group Un; [Apis mellifera] draft genome, Amel_4.0.	2e-16	ens|ENSAPMP00000018284	pep:novel group:AMEL2.0:GroupUn:271095211:271095935:1 gene:ENSAPMG00000010569 transcript:ENSAPMT00000018282	9e-41	2	M
SI.CL.6.cl.650.Contig2	--	--	--	--	chr|AMe_AADG05017260|AMe_AADG05017260.1	Linkage group Un; [Apis mellifera] draft genome, Amel_4.0.	2e-16	ens|ENSAPMP00000018284	pep:novel group:AMEL2.0:GroupUn:271095211:271095935:1 gene:ENSAPMG00000010569 transcript:ENSAPMT00000018282	2e-30	2	M
SI.CL.6.cl.650.SiJWA12BDJR4G11.scf	--	--	--	--	chr|AMe_AADG05017260|AMe_AADG05017260.1	Linkage group Un; [Apis mellifera] draft genome, Amel_4.0.	3e-15	ens|ENSAPMP00000018284	pep:novel group:AMEL2.0:GroupUn:271095211:271095935:1 gene:ENSAPMG00000010569 transcript:ENSAPMT00000018282	3e-40	2	M
SI.CL.8.cl.839.Contig1	--	--	--	--	chr|AMe_AADG05007276|AMe_AADG05007276.1	Linkage group Un; [Apis mellifera] draft genome, Amel_4.0.	1e-12	ens|ENSAPMP00000010283	pep:novel group:AMEL2.0:GroupUn:279107216:279107494:-1 gene:ENSAPMG00000005952 transcript:ENSAPMT00000010283	8e-17	14	M
SI.CL.16.cl.1624.Contig1	--	--	--	--	chr|AMe_AADG05009648|AMe_AADG05009648.1	Linkage group Un; [Apis mellifera] draft genome, Amel_4.0.	4e-11	--	--	--	--	M
SI.CL.17.cl.1764.Contig1	--	--	--	--	chr|AMe_AADG05008091|AMe_AADG05008091.1	Linkage group Un; [Apis mellifera] draft genome, Amel_4.0.	2e-09	--	--	--	--	M
SiJWF05ABM.scf	--	--	--	--	chr|AMe_AADG05005784|AMe_AADG05005784.1	Linkage group Un; [Apis mellifera] draft genome, Amel_4.0.	6e-07	--	--	--	--	M
SI.CL.19.cl.1912.Contig1	--	--	--	--	chr|AMe_AADG05014001|AMe_AADG05014001.1	Linkage group Un; [Apis mellifera] draft genome, Amel_4.0.	2e-06	--	--	--	--	M
SI.CL.2.cl.240.Contig1	--	--	--	--	chr|AMe_AADG05008947|AMe_AADG05008947.1	Linkage group Un; [Apis mellifera] draft genome, Amel_4.0.	5e-06	--	--	--	--	M
SI.CL.15.cl.1512.Contig1	--	--	--	--	chr|AMe_AADG05007308|AMe_AADG05007308.1	Linkage group Un; [Apis mellifera] draft genome, Amel_4.0.	7e-06	--	--	--	--	M
SiJWB04AAL.scf	--	--	--	--	--	--	--	ens|ENSAPMP00000020699	pep:novel group:AMEL2.0:GroupUn:94530467:94531340:-1 gene:ENSAPMG00000011972 transcript:ENSAPMT00000020693	5e-28	3	M
SiJWB06AAH.scf	--	--	--	--	--	--	--	ens|ENSAPMP00000020074	pep:novel group:AMEL2.0:GroupUn:57044032:57044933:-1 gene:ENSAPMG00000012249 transcript:ENSAPMT00000020069	7e-25	6	M
SI.CL.14.cl.1418.Contig1	--	--	--	--	--	--	--	ens|ENSAPMP00000031009	pep:novel group:AMEL2.0:GroupUn:247670435:247671593:1 gene:ENSAPMG00000012897 transcript:ENSAPMT00000031008	5e-12	13	M
SI.CL.24.cl.2493.Contig1	--	--	--	--	--	--	--	--	--	--	--	M
SiJWC03CAK2.scf	--	--	--	--	--	--	--	--	--	--	--	M
SI.CL.32.cl.3245.Contig1	--	--	--	--	--	--	--	--	--	--	--	M
SiJWB08BCR.scf	--	--	--	--	--	--	--	--	--	--	--	M
SiJWE12BDX.scf	--	--	--	--	--	--	--	--	--	--	--	M
SI.CL.43.cl.4330.Contig1	--	--	--	--	--	--	--	--	--	--	--	M
SiJWC04AAC2.scf	--	--	--	--	--	--	--	--	--	--	--	M
SiJWE01AAB.scf	--	--	--	--	--	--	--	--	--	--	--	M
SiJWA12BAL.scf	--	--	--	--	--	--	--	--	--	--	--	M
SiJWG12AAB.scf	--	--	--	--	--	--	--	--	--	--	--	M
SiJWB12CAO2.scf	--	--	--	--	--	--	--	--	--	--	--	M
SiJWA11ADN.scf	--	--	--	--	--	--	--	--	--	--	--	M
SiJWG01BCT3.scf	--	--	--	--	--	--	--	--	--	--	--	M
SI.CL.15.cl.1523.Contig1	--	--	--	--	--	--	--	--	--	--	--	M
SI.CL.34.cl.3444.Contig1	--	--	--	--	--	--	--	--	--	--	--	M
SI.CL.16.cl.1618.SiJWA07ABZ.scf	--	--	--	--	--	--	--	--	--	--	--	M
SI.CL.0.cl.065.Contig2	--	--	--	--	--	--	--	--	--	--	--	M
SI.CL.39.cl.3919.Contig1	--	--	--	--	--	--	--	--	--	--	--	M
SI.CL.22.cl.2297.Contig1	--	--	--	--	--	--	--	--	--	--	--	M
SI.CL.18.cl.1862.Contig1	--	--	--	--	--	--	--	--	--	--	--	M
SI.CL.0.cl.065.Contig4	--	--	--	--	--	--	--	--	--	--	--	M
SiJWH07BAA2.scf	--	--	--	--	--	--	--	--	--	--	--	M
SI.CL.0.cl.054.Contig1	--	--	--	--	--	--	--	--	--	--	--	M
SI.CL.4.cl.475.Contig1	--	--	--	--	--	--	--	--	--	--	--	M
SI.CL.16.cl.1618.Contig1	--	--	--	--	--	--	--	--	--	--	--	M
SiJWD09ACH.scf	--	--	--	--	--	--	--	--	--	--	--	M
SiJWC12ADR.scf	--	--	--	--	--	--	--	--	--	--	--	M
SiJWA06CAT2.scf	--	--	--	--	--	--	--	--	--	--	--	M
SI.CL.11.cl.1133.SiJWC07BDY.scf	--	--	--	--	--	--	--	--	--	--	--	M
SI.CL.29.cl.2960.Contig1	--	--	--	--	--	--	--	--	--	--	--	M
SiJWA04ACY.scf	--	--	--	--	--	--	--	--	--	--	--	M
SiJWH02ADS.scf	--	--	--	--	--	--	--	--	--	--	--	M
SI.CL.13.cl.1352.SiJWE11ABR.scf	--	--	--	--	--	--	--	--	--	--	--	M
SI.CL.32.cl.3245.SiJWG12BDS2.scf	--	--	--	--	--	--	--	--	--	--	--	M
SiJWG09BBS.scf	--	--	--	--	--	--	--	--	--	--	--	M
SiJWG10ADC.scf	--	--	--	--	--	--	--	--	--	--	--	M
SiJWG05BDV2.scf	--	--	--	--	--	--	--	--	--	--	--	M
SiJWH11AA1_evro_pl7_Sp6.scf	--	--	--	--	--	--	--	--	--	--	--	M
SiJWF06CAD.scf	--	--	--	--	--	--	--	--	--	--	--	M
SI.CL.16.cl.1613.Contig1	--	--	--	--	--	--	--	--	--	--	--	M
SiJWG07AAE.tag5_G07_13.scf	--	--	--	--	--	--	--	--	--	--	--	M
SI.CL.41.cl.4117.Contig1	--	--	--	--	--	--	--	--	--	--	--	M
SI.CL.0.cl.065.SiJWD01ACH.scf	--	--	--	--	--	--	--	--	--	--	--	M
SI.CL.38.cl.3808.Contig1	--	--	--	--	--	--	--	--	--	--	--	M
SI.CL.31.cl.3192.Contig1	--	--	--	--	--	--	--	--	--	--	--	M
SiJWB04AA1.tag5_B04_04.scf	--	--	--	--	--	--	--	--	--	--	--	M
SiJWH07ACH.scf	--	--	--	--	--	--	--	--	--	--	--	M
SI.CL.15.cl.1513.SiJWC07CAF2.scf	--	--	--	--	--	--	--	--	--	--	--	M
SI.CL.0.cl.065.Contig6	--	--	--	--	--	--	--	--	--	--	--	M
SiJWE06BAQ.scf	--	--	--	--	--	--	--	--	--	--	--	M
SiJWC03ACJ.scf	--	--	--	--	--	--	--	--	--	--	--	M
SiJWE09CAF2.scf	--	--	--	--	--	--	--	--	--	--	--	M
SI.CL.9.cl.945.Contig5	--	--	--	--	--	--	--	--	--	--	--	M
SI.CL.39.cl.3945.Contig1	--	--	--	--	--	--	--	--	--	--	--	M
SI.CL.17.cl.1787.Contig1	--	--	--	--	--	--	--	--	--	--	--	M
SiJWH02ADF.scf	--	--	--	--	--	--	--	--	--	--	--	M
SiJWB12BAD.scf	--	--	--	--	--	--	--	--	--	--	--	M
SiJWE12CAN2.scf	--	--	--	--	--	--	--	--	--	--	--	M
SI.CL.17.cl.1715.Contig1	--	--	--	--	--	--	--	--	--	--	--	M
SI.CL.10.cl.1060.Contig1	--	--	--	--	--	--	--	--	--	--	--	M
SiJWG10BAQ.scf	--	--	--	--	--	--	--	--	--	--	--	M
SI.CL.31.cl.3168.SiJWB11BDJ.scf	--	--	--	--	--	--	--	--	--	--	--	M
SiJWC05ADA.scf	--	--	--	--	--	--	--	--	--	--	--	M
SI.CL.0.cl.015.Contig1	--	--	--	--	--	--	--	--	--	--	--	M
SiJWD09ACI.scf	--	--	--	--	--	--	--	--	--	--	--	M
SiJWC10ABS.scf	--	--	--	--	--	--	--	--	--	--	--	M
SiJWG04BAX.scf	--	--	--	--	--	--	--	--	--	--	--	M
SiJWF08ACP.scf	--	--	--	--	--	--	--	--	--	--	--	M
SI.CL.8.cl.821.Contig1	--	--	--	--	--	--	--	--	--	--	--	M
SI.CL.35.cl.3553.Contig1	--	--	--	--	--	--	--	--	--	--	--	M
SI.CL.3.cl.378.SiJWC02BAL.scf	--	--	--	--	--	--	--	--	--	--	--	M
SI.CL.1.cl.175.Contig2	--	--	--	--	--	--	--	--	--	--	--	M
SiJWB03BDHR4G04.scf	--	--	--	--	--	--	--	--	--	--	--	M
SiJWB01BAE.scf	--	--	--	--	--	--	--	--	--	--	--	M
SI.CL.11.cl.1131.Contig1	--	--	--	--	--	--	--	--	--	--	--	M
SI.CL.2.cl.293.Contig1	--	--	--	--	--	--	--	--	--	--	--	M
SI.CL.19.cl.1904.Contig1	--	--	--	--	--	--	--	--	--	--	--	M
SiJWH08ACT.scf	--	--	--	--	--	--	--	--	--	--	--	M
SiJWA12BCK2.scf	--	--	--	--	--	--	--	--	--	--	--	M
SiJWB07BAA2.scf	--	--	--	--	--	--	--	--	--	--	--	M
SiJWE08BDF.scf	--	--	--	--	--	--	--	--	--	--	--	M
SiJWF01BBI.scf	--	--	--	--	--	--	--	--	--	--	--	M
SiJWF12AAD.scf	--	--	--	--	--	--	--	--	--	--	--	M
SiJWD03AEA.scf	--	--	--	--	--	--	--	--	--	--	--	M
SiJWH08ADB.scf	--	--	--	--	--	--	--	--	--	--	--	M
SI.CL.40.cl.4007.Contig1	--	--	--	--	--	--	--	--	--	--	--	M
SiJWC02CAS2.scf	--	--	--	--	--	--	--	--	--	--	--	M
SI.CL.15.cl.1513.Contig1	--	--	--	--	--	--	--	--	--	--	--	M
SiJWH04BBD2.scf	--	--	--	--	--	--	--	--	--	--	--	M
SI.CL.27.cl.2702.Contig1	--	--	--	--	--	--	--	--	--	--	--	M
SI.CL.26.cl.2690.Contig1	--	--	--	--	--	--	--	--	--	--	--	M
SI.CL.20.cl.2002.Contig1	--	--	--	--	--	--	--	--	--	--	--	M
SI.CL.0.cl.065.Contig9	--	--	--	--	--	--	--	--	--	--	--	M
SiJWB11ABK.scf	--	--	--	--	--	--	--	--	--	--	--	M
SI.CL.1.cl.147.Contig1	--	--	--	--	--	--	--	--	--	--	--	M
SiJWH01CAP.scf	--	--	--	--	--	--	--	--	--	--	--	M
SiJWA08ABX.scf	--	--	--	--	--	--	--	--	--	--	--	M
SI.CL.30.cl.3089.Contig1	--	--	--	--	--	--	--	--	--	--	--	M
SiJWH08BDZ.scf	--	--	--	--	--	--	--	--	--	--	--	M
SI.CL.10.cl.1072.Contig1	--	--	--	--	--	--	--	--	--	--	--	M
SiJWF07AEA.scf	--	--	--	--	--	--	--	--	--	--	--	M
SI.CL.0.cl.065.Contig3	--	--	--	--	--	--	--	--	--	--	--	M
SiJWD11AAU.scf	--	--	--	--	--	--	--	--	--	--	--	M
SiJWE07AAC2.scf	--	--	--	--	--	--	--	--	--	--	--	M
SiJWD09ADV.scf	--	--	--	--	--	--	--	--	--	--	--	M
SI.CL.0.cl.065.Contig5	--	--	--	--	--	--	--	--	--	--	--	M
SI.CL.42.cl.4248.Contig1	--	--	--	--	--	--	--	--	--	--	--	M
SI.CL.17.cl.1742.Contig1	--	--	--	--	--	--	--	--	--	--	--	M
SiJWG06BBR.scf	--	--	--	--	--	--	--	--	--	--	--	M
SiJWF04BEA.scf	--	--	--	--	--	--	--	--	--	--	--	M
SI.CL.8.cl.869.Contig1	--	--	--	--	--	--	--	--	--	--	--	M
SI.CL.9.cl.942.SiJWF05AAF2.scf	--	--	--	--	--	--	--	--	--	--	--	M
SiJWG11BDS2.scf	--	--	--	--	--	--	--	--	--	--	--	M
SI.CL.30.cl.3013.SiJWH12BAT.scf	--	--	--	--	--	--	--	--	--	--	--	M
SI.CL.35.cl.3559.Contig1	--	--	--	--	--	--	--	--	--	--	--	M
SiJWC02CAL2.scf	--	--	--	--	--	--	--	--	--	--	--	M
SiJWB08BAE.scf	--	--	--	--	--	--	--	--	--	--	--	M
SiJWH07AAQ.scf	--	--	--	--	--	--	--	--	--	--	--	M
SiJWC07CAD.scf	--	--	--	--	--	--	--	--	--	--	--	M
SI.CL.29.cl.2932.Contig1	--	--	--	--	--	--	--	--	--	--	--	M
SiJWG11AAA2.scf	--	--	--	--	--	--	--	--	--	--	--	M
SI.CL.1.cl.113.Contig1	--	--	--	--	--	--	--	--	--	--	--	M
SI.CL.34.cl.3474.Contig1	--	--	--	--	--	--	--	--	--	--	--	M
SiJWH01AAA.scf	--	--	--	--	--	--	--	--	--	--	--	M
SI.CL.11.cl.1133.Contig1	--	--	--	--	--	--	--	--	--	--	--	M
SiJWC08ABA.scf	--	--	--	--	--	--	--	--	--	--	--	M
SI.CL.36.cl.3693.Contig1	--	--	--	--	--	--	--	--	--	--	--	M
SiJWD06ABF.scf	--	--	--	--	--	--	--	--	--	--	--	M
SI.CL.29.cl.2968.Contig1	--	--	--	--	--	--	--	--	--	--	--	M
SiJWA04ADW.scf	--	--	--	--	--	--	--	--	--	--	--	M
SI.CL.8.cl.895.Contig1	--	--	--	--	--	--	--	--	--	--	--	M
SiJWB11BBY.scf	--	--	--	--	--	--	--	--	--	--	--	M
SiJWG06ACG.scf	--	--	--	--	--	--	--	--	--	--	--	M
SiJWF05BBW.scf	--	--	--	--	--	--	--	--	--	--	--	M
SiJWG12BAW2.scf	--	--	--	--	--	--	--	--	--	--	--	M
SI.CL.35.cl.3519.Contig1	--	--	--	--	--	--	--	--	--	--	--	M
SI.CL.29.cl.2914.Contig1	--	--	--	--	--	--	--	--	--	--	--	M
SI.CL.40.cl.4055.Contig1	--	--	--	--	--	--	--	--	--	--	--	M
SI.CL.28.cl.2816.Contig1	--	--	--	--	--	--	--	--	--	--	--	M
SiJWF04ADJ.scf	--	--	--	--	--	--	--	--	--	--	--	M
SI.CL.10.cl.1037.Contig1	--	--	--	--	--	--	--	--	--	--	--	M
SI.CL.11.cl.1116.Contig1	--	--	--	--	--	--	--	--	--	--	--	M
SiJWB12ADI.scf	--	--	--	--	--	--	--	--	--	--	--	M
SI.CL.5.cl.539.Contig1	--	--	--	--	--	--	--	--	--	--	--	M
SiJWG02BAM.scf	--	--	--	--	--	--	--	--	--	--	--	M
SiJWB01ACT.scf	--	--	--	--	--	--	--	--	--	--	--	M
SI.CL.20.cl.2088.Contig1	--	--	--	--	--	--	--	--	--	--	--	M
SI.CL.41.cl.4139.Contig1	--	--	--	--	--	--	--	--	--	--	--	M
SI.CL.0.cl.065.Contig8	--	--	--	--	--	--	--	--	--	--	--	M
SI.CL.37.cl.3712.Contig1	--	--	--	--	--	--	--	--	--	--	--	M
SI.CL.6.cl.635.Contig1	--	--	--	--	--	--	--	--	--	--	--	M
SiJWC12ABL.scf	--	--	--	--	--	--	--	--	--	--	--	M
SI.CL.1.cl.198.Contig1	--	--	--	--	--	--	--	--	--	--	--	M
SI.CL.17.cl.1754.Contig1	--	--	--	--	--	--	--	--	--	--	--	M
SI.CL.8.cl.856.Contig1	--	--	--	--	--	--	--	--	--	--	--	M
SiJWC04ACT.scf	--	--	--	--	--	--	--	--	--	--	--	M
SI.CL.33.cl.3314.Contig1	--	--	--	--	--	--	--	--	--	--	--	M
SiJWC08CAI2.scf	--	--	--	--	--	--	--	--	--	--	--	M
SiJWC05ACW.scf	--	--	--	--	--	--	--	--	--	--	--	M
SiJWC06ABB.scf	--	--	--	--	--	--	--	--	--	--	--	M
SiJWB01ABS.scf	--	--	--	--	--	--	--	--	--	--	--	M
SiJWH02BAK.scf	--	--	--	--	--	--	--	--	--	--	--	M
SI.CL.39.cl.3929.Contig1	--	--	--	--	--	--	--	--	--	--	--	M
SiJWG05BBE.scf	--	--	--	--	--	--	--	--	--	--	--	M
SiJWC11AAE.tag5_C11_05.scf	--	--	--	--	--	--	--	--	--	--	--	M
SI.CL.16.cl.1618.SiJWD03CAN2.scf	--	--	--	--	--	--	--	--	--	--	--	M
SI.CL.30.cl.3013.Contig1	--	--	--	--	--	--	--	--	--	--	--	M
SiJWC02ADU.scf	--	--	--	--	--	--	--	--	--	--	--	M
SiJWF04BDPR5H06.scf	--	--	--	--	--	--	--	--	--	--	--	M
SiJWB04AA1_evro_B05_3prime.scf	--	--	--	--	--	--	--	--	--	--	--	M
SI.CL.0.cl.065.Contig1	--	--	--	--	--	--	--	--	--	--	--	M
SI.CL.38.cl.3857.Contig1	--	--	--	--	--	--	--	--	--	--	--	M
SI.CL.1.cl.155.Contig1	--	--	--	--	--	--	--	--	--	--	--	M
SiJWB09BCA2.scf	--	--	--	--	--	--	--	--	--	--	--	M
SI.CL.6.cl.698.Contig1	--	--	--	--	--	--	--	--	--	--	--	M
SiJWE09AAZ.scf	--	--	--	--	--	--	--	--	--	--	--	M
SiJWF04BBI.scf	--	--	--	--	--	--	--	--	--	--	--	M
SiJWG09CAP.scf	--	--	--	--	--	--	--	--	--	--	--	M
SI.CL.12.cl.1299.Contig1	--	--	--	--	--	--	--	--	--	--	--	M
SiJWG07CAA.scf	--	--	--	--	--	--	--	--	--	--	--	M
SI.CL.30.cl.3077.Contig1	--	--	--	--	--	--	--	--	--	--	--	M
SiJWE03AAO.scf	--	--	--	--	--	--	--	--	--	--	--	M
SiJWG10BAZ2.scf	--	--	--	--	--	--	--	--	--	--	--	M
SI.CL.16.cl.1618.SiJWB11ADE.scf	--	--	--	--	--	--	--	--	--	--	--	M
SiJWF01ACL.scf	--	--	--	--	--	--	--	--	--	--	--	M
SiJWG05AAH.scf	--	--	--	--	--	--	--	--	--	--	--	M
SI.CL.8.cl.821.Contig2	--	--	--	--	--	--	--	--	--	--	--	M
SiJWE04BBF.scf	--	--	--	--	--	--	--	--	--	--	--	M
SI.CL.14.cl.1498.Contig1	--	--	--	--	--	--	--	--	--	--	--	M
SiJWC07BAK.scf	--	--	--	--	--	--	--	--	--	--	--	M
SiJWD08AAL.scf	--	--	--	--	--	--	--	--	--	--	--	M
SI.CL.40.cl.4048.Contig1	--	--	--	--	--	--	--	--	--	--	--	M
SI.CL.6.cl.651.Contig1	gnl|Amel|GB10842-PA	1e-146	chr|NC_007080|NC_007080.2 Chromosome LG11; [Apis mellifera] gi:110825732 chromosome 11 complete sequence	1.87e-51	chr|AMe_AADG05004392|AMe_AADG05004392.1	Linkage group 11; [Apis mellifera] draft genome, Amel_4.0.	2e-17	ens|ENSAPMP00000012466	pep:known group:AMEL2.0:Group11:10557473:10560073:-1 gene:ENSAPMG00000007149 transcript:ENSAPMT00000012466	1e-143	2	A
SI.CL.18.cl.1809.Contig1	gnl|Amel|GB13594-PA	7e-79	chr|NC_007081|NC_007081.2 Chromosome LG12; [Apis mellifera] gi:110825756 chromosome 12 complete sequence	1.04e-48	chr|AMe_AADG05004607|AMe_AADG05004607.1	Linkage group 12; [Apis mellifera] draft genome, Amel_4.0.	2e-23	ens|ENSAPMP00000006184	pep:novel group:AMEL2.0:Group12:5082006:5085406:-1 gene:ENSAPMG00000003520 transcript:ENSAPMT00000006184	4e-70	2	A
SiJWC10BBX.scf	gnl|Amel|GB13613-PA	3e-77	chr|NC_007080|NC_007080.2 Chromosome LG11; [Apis mellifera] gi:110825732 chromosome 11 complete sequence	1.74e-11	--	--	--	ens|ENSAPMP00000002356	pep:novel group:AMEL2.0:GroupUn:12084307:12096957:-1 gene:ENSAPMG00000001377 transcript:ENSAPMT00000002356	6e-63	2	A
SI.CL.3.cl.349.Contig1	gnl|Amel|GB18441-PA	1e-72	chr|NC_007081|NC_007081.2 Chromosome LG12; [Apis mellifera] gi:110825756 chromosome 12 complete sequence	2.59e-74	chr|AMe_AADG05004626|AMe_AADG05004626.1	Linkage group 12; [Apis mellifera] draft genome, Amel_4.0.	3e-15	ens|ENSAPMP00000016887	pep:known group:AMEL2.0:Group12:5735052:5737926:1 gene:ENSAPMG00000009637 transcript:ENSAPMT00000016887	1e-70	2	A
SI.CL.18.cl.1875.Contig1	gnl|Amel|GB10905-PA	3e-72	chr|NC_007083|NC_007083.2 Chromosome LG14; [Apis mellifera] gi:110825763 chromosome 14 complete sequence	6.6e-40	chr|AMe_AADG05012437|AMe_AADG05012437.1	Linkage group Un; [Apis mellifera] draft genome, Amel_4.0.	1e-05	--	--	--	--	A
SiJWE11ABE.tag5_E11_09.scf	gnl|Amel|GB10905-PA	2e-71	chr|NC_007085|NC_007085.2 Chromosome LG16; [Apis mellifera] gi:110825765 chromosome 16 complete sequence	2.17e-31	--	--	--	tr|Q306I1|Q306I1_APIME	(CYP4G11)Cytochrome P450 monooxygenase.[Apis mellifera]	6e-48	19	A
SI.CL.22.cl.2206.Contig1	gnl|Amel|GB16959-PA	2e-68	chr|NC_007073|NC_007073.2 Chromosome LG4; [Apis mellifera] gi:110825768 chromosome 4 complete sequence	2.68e-18	--	--	--	ens|ENSAPMP00000021201	pep:novel group:AMEL2.0:GroupUn:92140709:92142412:1 gene:ENSAPMG00000015792 transcript:ENSAPMT00000021194	2e-66	3	A
SI.CL.3.cl.379.Contig1	gnl|Amel|GB10133-PA	3e-67	chr|NC_007077|NC_007077.2 Chromosome LG8; [Apis mellifera] gi:110825772 chromosome 8 complete sequence	1.91e-45	chr|AMe_AADG05003013|AMe_AADG05003013.1	Linkage group 8; [Apis mellifera] draft genome, Amel_4.0.	5e-08	tr|Q7YXM6|Q7YXM6_APILI	(Sod1)CuZn superoxide dismutase.[Apis mellifera ligustica]	4e-65	2	A
SI.CL.3.cl.356.Contig2	gnl|Amel|GB13999-PA	2e-62	chr|NC_007073|NC_007073.2 Chromosome LG4; [Apis mellifera] gi:110825768 chromosome 4 complete sequence	2.57e-65	--	--	--	ens|ENSAPMP00000014368	pep:known group:AMEL2.0:Group4:8022475:8028571:1 gene:ENSAPMG00000008204 transcript:ENSAPMT00000014368	8e-61	4	A
SI.CL.29.cl.2953.Contig1	gnl|Amel|GB19846-PA	1e-61	chr|NC_007074|NC_007074.2 Chromosome LG5; [Apis mellifera] gi:110825769 chromosome 5 complete sequence	5.94e-11	--	--	--	ens|ENSAPMP00000018141	pep:novel group:AMEL2.0:Group2:10969466:10971482:1 gene:ENSAPMG00000008333 transcript:ENSAPMT00000018140	1e-58	2	A
SI.CL.27.cl.2709.Contig1	gnl|Amel|GB19405-PA	2e-59	chr|NC_007075|NC_007075.2 Chromosome LG6; [Apis mellifera] gi:110825770 chromosome 6 complete sequence	1.34e-36	chr|AMe_AADG05002522|AMe_AADG05002522.1	Linkage group 6; [Apis mellifera] draft genome, Amel_4.0.	2e-28	tr|Q7YU97|Q7YU97_APIME	(vha16)Vacuolar H+ ATP synthase 16 kDa proteolipid subunit.[Apis mellifera]	3e-58	10	A
SiJWG01BBU.scf	gnl|Amel|GB19657-PA	8e-59	chr|NC_007084|NC_007084.2 Chromosome LG15; [Apis mellifera] gi:110825764 chromosome 15 complete sequence	2.31e-60	chr|AMe_AADG05005335|AMe_AADG05005335.1	Linkage group 15; [Apis mellifera] draft genome, Amel_4.0.	3e-12	--	--	--	--	A
SI.CL.17.cl.1774.Contig1	gnl|Amel|GB13999-PA	4e-58	chr|NC_007073|NC_007073.2 Chromosome LG4; [Apis mellifera] gi:110825768 chromosome 4 complete sequence	6.83e-65	--	--	--	ens|ENSAPMP00000014368	pep:known group:AMEL2.0:Group4:8022475:8028571:1 gene:ENSAPMG00000008204 transcript:ENSAPMT00000014368	1e-63	3	A
SI.CL.2.cl.249.Contig1	gnl|Amel|GB10905-PA	1e-51	chr|NC_007085|NC_007085.2 Chromosome LG16; [Apis mellifera] gi:110825765 chromosome 16 complete sequence	1.43e-37	--	--	--	ens|ENSAPMP00000034780	pep:novel group:AMEL2.0:GroupUn:265470783:265471970:1 gene:ENSAPMG00000014714 transcript:ENSAPMT00000034780	2e-49	3	A
SI.CL.19.cl.1982.Contig1	gnl|Amel|GB13613-PA	5e-51	chr|NC_007080|NC_007080.2 Chromosome LG11; [Apis mellifera] gi:110825732 chromosome 11 complete sequence	5.3e-06	--	--	--	tr|Q6J4Q1|Q6J4Q1_APIME	Hexamerin 70b.[Apis mellifera]	6e-31	2	A
SiJWB07BBM2.scf	gnl|Amel|GB19846-PA	3e-47	chr|NC_007074|NC_007074.2 Chromosome LG5; [Apis mellifera] gi:110825769 chromosome 5 complete sequence	1.03e-15	--	--	--	ens|ENSAPMP00000027167	pep:novel group:AMEL2.0:Group2:10968472:10971346:1 gene:ENSAPMG00000008333 transcript:ENSAPMT00000027165	4e-45	2	A
SI.CL.35.cl.3594.Contig1	gnl|Amel|GB19846-PA	4e-47	chr|NC_007071|NC_007071.2 Chromosome LG2; [Apis mellifera] gi:110825766 chromosome 2 complete sequence	1.22e-16	--	--	--	ens|ENSAPMP00000018141	pep:novel group:AMEL2.0:Group2:10969466:10971482:1 gene:ENSAPMG00000008333 transcript:ENSAPMT00000018140	6e-45	2	A
SiJWD12ADW.scf	gnl|Amel|GB13999-PA	1e-43	chr|NC_007073|NC_007073.2 Chromosome LG4; [Apis mellifera] gi:110825768 chromosome 4 complete sequence	1.16e-36	--	--	--	tr|Q868N5|Q868N5_APIME	(vg)Vitellogenin precursor.[Apis mellifera]	2e-41	4	A
SI.CL.34.cl.3456.Contig1	gnl|Amel|GB19846-PA	1e-43	chr|NC_007074|NC_007074.2 Chromosome LG5; [Apis mellifera] gi:110825769 chromosome 5 complete sequence	1.2e-06	--	--	--	ens|ENSAPMP00000027167	pep:novel group:AMEL2.0:Group2:10968472:10971346:1 gene:ENSAPMG00000008333 transcript:ENSAPMT00000027165	3e-41	2	A
SI.CL.42.cl.4218.Contig1	gnl|Amel|GB10133-PA	2e-43	chr|NC_007077|NC_007077.2 Chromosome LG8; [Apis mellifera] gi:110825772 chromosome 8 complete sequence	2e-33	--	--	--	--	--	--	--	A
SiJWH12BDI2.scf	gnl|Amel|GB13613-PA	5e-42	--	--	--	--	--	ens|ENSAPMP00000002356	pep:novel group:AMEL2.0:GroupUn:12084307:12096957:-1 gene:ENSAPMG00000001377 transcript:ENSAPMT00000002356	2e-29	2	A
SI.CL.9.cl.912.Contig1	gnl|Amel|GB19745-PA	3e-41	chr|NC_007084|NC_007084.2 Chromosome LG15; [Apis mellifera] gi:110825764 chromosome 15 complete sequence	1.38e-40	--	--	--	tr|Q86PH6|Q86PH6_APIME	(trf)Transferrin.[Apis mellifera]	4e-39	2	A
SiJWC09BBS.scf	gnl|Amel|GB10905-PA	3e-41	chr|NC_007085|NC_007085.2 Chromosome LG16; [Apis mellifera] gi:110825765 chromosome 16 complete sequence	2.3e-14	--	--	--	tr|Q306I1|Q306I1_APIME	(CYP4G11)Cytochrome P450 monooxygenase.[Apis mellifera]	5e-21	17	A
SI.CL.3.cl.331.Contig1	gnl|Amel|GB20117-PA	1e-40	chr|NC_007070|NC_007070.2 Chromosome LG1; [Apis mellifera] gi:110825701 chromosome 1 complete sequence	7.18e-22	--	--	--	--	--	--	--	A
SI.CL.3.cl.356.Contig1	gnl|Amel|GB13999-PA	3e-35	chr|NC_007073|NC_007073.2 Chromosome LG4; [Apis mellifera] gi:110825768 chromosome 4 complete sequence	2.14e-56	--	--	--	ens|ENSAPMP00000014368	pep:known group:AMEL2.0:Group4:8022475:8028571:1 gene:ENSAPMG00000008204 transcript:ENSAPMT00000014368	2e-53	5	A
SiJWH05BCA2.scf	gnl|Amel|GB10905-PA	2e-32	chr|NC_007085|NC_007085.2 Chromosome LG16; [Apis mellifera] gi:110825765 chromosome 16 complete sequence	5.37e-08	--	--	--	tr|Q306I1|Q306I1_APIME	(CYP4G11)Cytochrome P450 monooxygenase.[Apis mellifera]	2e-24	20	A
SI.CL.28.cl.2831.SiJWA11BBV2.scf	gnl|Amel|GB10905-PA	9e-32	chr|NC_007085|NC_007085.2 Chromosome LG16; [Apis mellifera] gi:110825765 chromosome 16 complete sequence	1.26e-18	--	--	--	ens|ENSAPMP00000034780	pep:novel group:AMEL2.0:GroupUn:265470783:265471970:1 gene:ENSAPMG00000014714 transcript:ENSAPMT00000034780	4e-29	3	A
SiJWF04ABD.scf	gnl|Amel|GB19846-PA	1e-30	chr|NC_007074|NC_007074.2 Chromosome LG5; [Apis mellifera] gi:110825769 chromosome 5 complete sequence	9.5e-20	--	--	--	ens|ENSAPMP00000014616	pep:known group:AMEL2.0:Group2:10969642:10971349:1 gene:ENSAPMG00000008333 transcript:ENSAPMT00000014616	2e-27	2	A
SI.CL.32.cl.3224.Contig1	gnl|Amel|GB10905-PA	1e-29	chr|NC_007074|NC_007074.2 Chromosome LG5; [Apis mellifera] gi:110825769 chromosome 5 complete sequence	3.2e-07	chr|AMe_AADG05005195|AMe_AADG05005195.1	Linkage group 14; [Apis mellifera] draft genome, Amel_4.0.	2e-06	--	--	--	--	A
SiJWB07ACS.scf	gnl|Amel|GB10905-PA	2e-25	chr|NC_007085|NC_007085.2 Chromosome LG16; [Apis mellifera] gi:110825765 chromosome 16 complete sequence	1e-12	--	--	--	--	--	--	--	A
SI.CL.12.cl.1214.Contig1	gnl|Amel|GB17875-PA	4e-23	chr|NC_007077|NC_007077.2 Chromosome LG8; [Apis mellifera] gi:110825772 chromosome 8 complete sequence	2.09e-22	--	--	--	tr|Q3LBA7|Q3LBA7_APIME	Hypothetical protein.[Apis mellifera]	4e-21	3	A
SI.CL.12.cl.1214.SiJWE03BDJ.scf	gnl|Amel|GB17875-PA	5e-23	chr|NC_007077|NC_007077.2 Chromosome LG8; [Apis mellifera] gi:110825772 chromosome 8 complete sequence	9.76e-23	--	--	--	tr|Q3LBA7|Q3LBA7_APIME	Hypothetical protein.[Apis mellifera]	1e-20	3	A
SI.CL.3.cl.356.Contig3	gnl|Amel|GB13999-PA	5e-23	chr|NC_007073|NC_007073.2 Chromosome LG4; [Apis mellifera] gi:110825768 chromosome 4 complete sequence	5.59e-16	--	--	--	tr|Q868N5|Q868N5_APIME	(vg)Vitellogenin precursor.[Apis mellifera]	7e-21	6	A
SI.CL.29.cl.2901.Contig1	gnl|Amel|GB17875-PA	9e-23	chr|NC_007077|NC_007077.2 Chromosome LG8; [Apis mellifera] gi:110825772 chromosome 8 complete sequence	9.79e-22	--	--	--	tr|Q3LBA7|Q3LBA7_APIME	Hypothetical protein.[Apis mellifera]	9e-21	2	A
SiJWH09ACV.scf	gnl|Amel|GB10905-PA	1e-22	--	--	--	--	--	--	--	--	--	A
SiJWA07ABP2.scf	gnl|Amel|GB13999-PA	5e-21	chr|NC_007073|NC_007073.2 Chromosome LG4; [Apis mellifera] gi:110825768 chromosome 4 complete sequence	3.16e-18	--	--	--	ens|ENSAPMP00000024878	pep:novel group:AMEL2.0:Group4:8022875:8028571:1 gene:ENSAPMG00000008204 transcript:ENSAPMT00000024876	1e-18	6	A
SiJWC09ADP.scf	gnl|Amel|GB14820-PA	9e-21	chr|NC_007085|NC_007085.2 Chromosome LG16; [Apis mellifera] gi:110825765 chromosome 16 complete sequence	4.22e-24	--	--	--	--	--	--	--	A
SiJWG04ABQ.scf	gnl|Amel|GB17780-PA	2e-20	chr|NC_007070|NC_007070.2 Chromosome LG1; [Apis mellifera] gi:110825701 chromosome 1 complete sequence	7.22e-06	--	--	--	--	--	--	--	A
SI.CL.40.cl.4070.Contig1	gnl|Amel|GB17780-PA	3e-20	--	--	--	--	--	--	--	--	--	A
SI.CL.29.cl.2953.SiJWB05CAX.scf	gnl|Amel|GB19846-PA	6e-20	chr|NC_007071|NC_007071.2 Chromosome LG2; [Apis mellifera] gi:110825766 chromosome 2 complete sequence	4.16e-13	--	--	--	ens|ENSAPMP00000028405	pep:novel group:AMEL2.0:Group2:10969961:10971358:1 gene:ENSAPMG00000008333 transcript:ENSAPMT00000028403	2e-17	4	A
SI.CL.12.cl.1214.Contig2	gnl|Amel|GB17875-PA	9e-19	chr|NC_007077|NC_007077.2 Chromosome LG8; [Apis mellifera] gi:110825772 chromosome 8 complete sequence	3.81e-10	--	--	--	tr|Q3LBA7|Q3LBA7_APIME	Hypothetical protein.[Apis mellifera]	4e-17	3	A
SI.CL.28.cl.2831.SiJWC06BAB.scf	gnl|Amel|GB10905-PA	1e-16	chr|NC_007085|NC_007085.2 Chromosome LG16; [Apis mellifera] gi:110825765 chromosome 16 complete sequence	2.57e-20	--	--	--	ens|ENSAPMP00000034780	pep:novel group:AMEL2.0:GroupUn:265470783:265471970:1 gene:ENSAPMG00000014714 transcript:ENSAPMT00000034780	2e-14	3	A
SI.CL.40.cl.4011.Contig1	gnl|Amel|GB10905-PA	9e-14	--	--	--	--	--	--	--	--	--	A
SiJWD07ABB.scf	gnl|Amel|GB14820-PA	2e-12	--	--	--	--	--	--	--	--	--	A
SI.CL.1.cl.182.Contig1	gnl|Amel|GB13325-PA	2e-12	--	--	--	--	--	tr|Q3LBA4|Q3LBA4_APIME	Hypothetical protein.[Apis mellifera]	2e-10	2	A
SI.CL.3.cl.331.Contig3	gnl|Amel|GB20117-PA	5e-12	chr|NC_007070|NC_007070.2 Chromosome LG1; [Apis mellifera] gi:110825701 chromosome 1 complete sequence	9.04e-14	--	--	--	--	--	--	--	A
SI.CL.1.cl.162.Contig1	gnl|Amel|GB13325-PA	5e-12	--	--	--	--	--	ens|ENSAPMP00000028441	pep:novel group:AMEL2.0:GroupUn:41017862:41021906:1 gene:ENSAPMG00000011321 transcript:ENSAPMT00000028439	4e-10	2	A
SiJWD10CAM2.scf	gnl|Amel|GB10905-PA	6e-11	chr|NC_007085|NC_007085.2 Chromosome LG16; [Apis mellifera] gi:110825765 chromosome 16 complete sequence	3.08e-09	--	--	--	ens|ENSAPMP00000034780	pep:novel group:AMEL2.0:GroupUn:265470783:265471970:1 gene:ENSAPMG00000014714 transcript:ENSAPMT00000034780	5e-08	4	A
SI.CL.1.cl.162.Contig2	gnl|Amel|GB13325-PA	9e-11	--	--	--	--	--	ens|ENSAPMP00000028441	pep:novel group:AMEL2.0:GroupUn:41017862:41021906:1 gene:ENSAPMG00000011321 transcript:ENSAPMT00000028439	8e-09	2	A
SI.CL.1.cl.162.SiJWG04ADC.scf	gnl|Amel|GB13325-PA	9e-11	--	--	--	--	--	tr|Q3LBA4|Q3LBA4_APIME	Hypothetical protein.[Apis mellifera]	2e-08	2	A
SI.CL.8.cl.863.Contig1	gnl|Amel|GB19392-PA	9e-10	--	--	--	--	--	--	--	--	--	A
SI.CL.1.cl.162.Contig3	gnl|Amel|GB17875-PA	3e-09	--	--	--	--	--	tr|Q3LBA7|Q3LBA7_APIME	Hypothetical protein.[Apis mellifera]	2e-07	8	A
SI.CL.29.cl.2901.SiJWG05BDP.scf	gnl|Amel|GB17875-PA	3e-08	chr|NC_007077|NC_007077.2 Chromosome LG8; [Apis mellifera] gi:110825772 chromosome 8 complete sequence	1.32e-08	--	--	--	--	--	--	--	A
SI.CL.1.cl.199.Contig3	gnl|Amel|GB17875-PA	3e-08	--	--	--	--	--	tr|Q3LBA7|Q3LBA7_APIME	Hypothetical protein.[Apis mellifera]	4e-06	7	A
SI.CL.1.cl.199.Contig2	gnl|Amel|GB17875-PA	1e-07	--	--	--	--	--	--	--	--	--	A
SI.CL.5.cl.577.Contig1	gnl|Amel|GB13587-PA	5e-07	--	--	--	--	--	--	--	--	--	A
SiJWH07ADS.scf	gnl|Amel|GB13999-PA	5e-07	--	--	--	--	--	--	--	--	--	A
SiJWD06AAH.scf	gnl|Amel|GB13999-PA	2e-06	--	--	--	--	--	--	--	--	--	A
SI.CL.0.cl.041.Contig1	--	--	chr|NC_001566|NC_001566.1 Chromosome Mt; [Apis mellifera] gi:5834925, complete sequence mitochondrion, complete genome	7.81e-152	chr|AMe_AADG05002787|AMe_AADG05002787.1	Linkage group 7; [Apis mellifera] draft genome, Amel_4.0.	7e-33	--	--	--	--	A
SI.CL.4.cl.464.Contig2	--	--	chr|NC_001566|NC_001566.1 Chromosome Mt; [Apis mellifera] gi:5834925, complete sequence mitochondrion, complete genome	5.23e-100	chr|AMe_AADG05003565|AMe_AADG05003565.1	Linkage group 9; [Apis mellifera] draft genome, Amel_4.0.	4e-07	--	--	--	--	A
SI.CL.0.cl.041.SiJWH03BDX.scf	--	--	chr|NC_001566|NC_001566.1 Chromosome Mt; [Apis mellifera] gi:5834925, complete sequence mitochondrion, complete genome	7.37e-69	chr|AMe_AADG05007360|AMe_AADG05007360.1	Linkage group 2; [Apis mellifera] draft genome, Amel_4.0.	2e-34	--	--	--	--	A
SI.CL.1.cl.121.Contig1	--	--	chr|NC_001566|NC_001566.1 Chromosome Mt; [Apis mellifera] gi:5834925, complete sequence mitochondrion, complete genome	1.79e-64	chr|AMe_AADG05016388|AMe_AADG05016388.1	Linkage group Un; [Apis mellifera] draft genome, Amel_4.0.	6e-10	--	--	--	--	A
SI.CL.1.cl.121.Contig2	--	--	chr|NC_001566|NC_001566.1 Chromosome Mt; [Apis mellifera] gi:5834925, complete sequence mitochondrion, complete genome	1.55e-52	chr|AMe_AADG05016388|AMe_AADG05016388.1	Linkage group Un; [Apis mellifera] draft genome, Amel_4.0.	2e-12	--	--	--	--	A
SI.CL.4.cl.464.SiJWC10BAB.scf	--	--	chr|NC_001566|NC_001566.1 Chromosome Mt; [Apis mellifera] gi:5834925, complete sequence mitochondrion, complete genome	8.53e-52	chr|AMe_AADG05003565|AMe_AADG05003565.1	Linkage group 9; [Apis mellifera] draft genome, Amel_4.0.	2e-16	--	--	--	--	A
SI.CL.0.cl.041.SiJWB03ADA.scf	--	--	chr|NC_001566|NC_001566.1 Chromosome Mt; [Apis mellifera] gi:5834925, complete sequence mitochondrion, complete genome	1.96e-51	chr|AMe_AADG05004454|AMe_AADG05004454.1	Linkage group 11; [Apis mellifera] draft genome, Amel_4.0.	5e-32	--	--	--	--	A
SI.CL.4.cl.466.Contig1	--	--	chr|NC_001566|NC_001566.1 Chromosome Mt; [Apis mellifera] gi:5834925, complete sequence mitochondrion, complete genome	4.3e-40	chr|AMe_AADG05003743|AMe_AADG05003743.1	Linkage group 10; [Apis mellifera] draft genome, Amel_4.0.	2e-13	--	--	--	--	A
SI.CL.22.cl.2213.SiJWD12AAW.scf	--	--	chr|NC_001566|NC_001566.1 Chromosome Mt; [Apis mellifera] gi:5834925, complete sequence mitochondrion, complete genome	5.26e-38	--	--	--	--	--	--	--	A
SI.CL.22.cl.2213.Contig2	--	--	chr|NC_001566|NC_001566.1 Chromosome Mt; [Apis mellifera] gi:5834925, complete sequence mitochondrion, complete genome	3.07e-30	--	--	--	--	--	--	--	A
SI.CL.0.cl.041.SiJWG12CAW.scf	--	--	chr|NC_007072|NC_007072.2 Chromosome LG3; [Apis mellifera] gi:110825767 chromosome 3 complete sequence	3.64e-21	--	--	--	--	--	--	--	A
SI.CL.4.cl.466.Contig2	--	--	chr|NC_001566|NC_001566.1 Chromosome Mt; [Apis mellifera] gi:5834925, complete sequence mitochondrion, complete genome	1.79e-20	chr|AMe_AADG05003743|AMe_AADG05003743.1	Linkage group 10; [Apis mellifera] draft genome, Amel_4.0.	1e-15	--	--	--	--	A
SI.CL.1.cl.194.SiJWH11ACB.scf	--	--	chr|NC_001566|NC_001566.1 Chromosome Mt; [Apis mellifera] gi:5834925, complete sequence mitochondrion, complete genome	1.24e-13	--	--	--	--	--	--	--	A
SI.CL.1.cl.194.Contig2	--	--	chr|NC_001566|NC_001566.1 Chromosome Mt; [Apis mellifera] gi:5834925, complete sequence mitochondrion, complete genome	3.01e-11	--	--	--	--	--	--	--	A
SI.CL.1.cl.194.SiJWB06AAN.scf	--	--	chr|NC_001566|NC_001566.1 Chromosome Mt; [Apis mellifera] gi:5834925, complete sequence mitochondrion, complete genome	3.1e-11	--	--	--	--	--	--	--	A
SI.CL.1.cl.194.Contig1	--	--	chr|NC_001566|NC_001566.1 Chromosome Mt; [Apis mellifera] gi:5834925, complete sequence mitochondrion, complete genome	7.02e-11	--	--	--	--	--	--	--	A
SI.CL.1.cl.194.SiJWC10CAE.scf	--	--	chr|NC_001566|NC_001566.1 Chromosome Mt; [Apis mellifera] gi:5834925, complete sequence mitochondrion, complete genome	1.21e-10	--	--	--	--	--	--	--	A
SI.CL.1.cl.194.SiJWB08ABQ.scf	--	--	chr|NC_001566|NC_001566.1 Chromosome Mt; [Apis mellifera] gi:5834925, complete sequence mitochondrion, complete genome	3.77e-10	--	--	--	--	--	--	--	A
SI.CL.1.cl.194.SiJWE06ACT.scf	--	--	chr|NC_001566|NC_001566.1 Chromosome Mt; [Apis mellifera] gi:5834925, complete sequence mitochondrion, complete genome	4.03e-10	--	--	--	--	--	--	--	A
SI.CL.1.cl.194.SiJWA02BCF2.scf	--	--	chr|NC_001566|NC_001566.1 Chromosome Mt; [Apis mellifera] gi:5834925, complete sequence mitochondrion, complete genome	5.83e-10	--	--	--	--	--	--	--	A
SI.CL.1.cl.194.Contig4	--	--	chr|NC_001566|NC_001566.1 Chromosome Mt; [Apis mellifera] gi:5834925, complete sequence mitochondrion, complete genome	8.35e-09	--	--	--	--	--	--	--	A
SI.CL.1.cl.162.SiJWG05BAQ.scf	--	--	chr|NC_007077|NC_007077.2 Chromosome LG8; [Apis mellifera] gi:110825772 chromosome 8 complete sequence	3.84e-06	--	--	--	--	--	--	--	A
SI.CL.1.cl.162.SiJWC08BCZ2.scf	--	--	chr|NC_007077|NC_007077.2 Chromosome LG8; [Apis mellifera] gi:110825772 chromosome 8 complete sequence	4.11e-06	--	--	--	--	--	--	--	A
SI.CL.1.cl.162.SiJWB07CAO2.scf	--	--	chr|NC_007077|NC_007077.2 Chromosome LG8; [Apis mellifera] gi:110825772 chromosome 8 complete sequence	4.2e-06	--	--	--	--	--	--	--	A
SI.CL.1.cl.199.SiJWC11AAN.scf	--	--	--	--	--	--	--	--	--	--	--	A
SI.CL.5.cl.577.Contig2	--	--	--	--	--	--	--	--	--	--	--	A
SI.CL.21.cl.2188.Contig1	--	--	--	--	--	--	--	--	--	--	--	A
SI.CL.1.cl.199.SiJWA02BDO2.scf	--	--	--	--	--	--	--	--	--	--	--	A
SI.CL.1.cl.199.SiJWD01BAQ.scf	--	--	--	--	--	--	--	--	--	--	--	A
SiJWH07ADL.scf	--	--	--	--	--	--	--	--	--	--	--	A
SI.CL.1.cl.162.SiJWA03BCG2.scf	--	--	--	--	--	--	--	--	--	--	--	A
SI.CL.18.cl.1888.Contig1	--	--	--	--	--	--	--	--	--	--	--	A
SI.CL.5.cl.577.SiJWC07ADR.scf	--	--	--	--	--	--	--	--	--	--	--	A
SI.CL.1.cl.199.SiJWD02BDQC.scf	--	--	--	--	--	--	--	--	--	--	--	A
SI.CL.1.cl.199.SiJWH08BAA2.scf	--	--	--	--	--	--	--	--	--	--	--	A
SI.CL.0.cl.051.Contig2	--	--	--	--	--	--	--	--	--	--	--	A
SI.CL.1.cl.162.SiJWA03BCG1.scf	--	--	--	--	--	--	--	--	--	--	--	A
SI.CL.1.cl.199.Contig1	--	--	--	--	--	--	--	--	--	--	--	A
SI.CL.1.cl.199.SiJWE10CAL2.scf	--	--	--	--	--	--	--	--	--	--	--	A
SI.CL.1.cl.194.SiJWB10BDG.scf	--	--	--	--	--	--	--	--	--	--	--	A
SI.CL.3.cl.385.Contig1	--	--	--	--	--	--	--	--	--	--	--	A
SiJWA10ABC.scf	--	--	--	--	--	--	--	--	--	--	--	A
SI.CL.1.cl.199.SiJWH11ABP2.scf	--	--	--	--	--	--	--	--	--	--	--	A
SI.CL.18.cl.1888.SiJWD11ADI.scf	--	--	--	--	--	--	--	--	--	--	--	A
SI.CL.13.cl.1304.Contig1	--	--	--	--	--	--	--	--	--	--	--	A
SiJWF12CAI2.scf	--	--	--	--	--	--	--	--	--	--	--	A
SI.CL.3.cl.385.SiJWD02ACB.scf	--	--	--	--	--	--	--	--	--	--	--	A
SI.CL.15.cl.1549.SiJWE04ABQ.scf	--	--	--	--	--	--	--	--	--	--	--	A
SI.CL.3.cl.345.Contig1	gnl|Amel|GB14832-PA	1e-129	chr|NC_007072|NC_007072.2 Chromosome LG3; [Apis mellifera] gi:110825767 chromosome 3 complete sequence	1.7e-127	chr|AMe_AADG05001393|AMe_AADG05001393.1	Linkage group 3; [Apis mellifera] draft genome, Amel_4.0.	9e-38	ens|ENSAPMP00000018948	pep:novel group:AMEL2.0:Group3:5406695:5408318:-1 gene:ENSAPMG00000014453 transcript:ENSAPMT00000018944	1e-127	2	H
SI.CL.4.cl.493.Contig1	gnl|Amel|GB13680-PA	1e-96	chr|NC_007080|NC_007080.2 Chromosome LG11; [Apis mellifera] gi:110825732 chromosome 11 complete sequence	5.46e-86	--	--	--	ens|ENSAPMP00000021083	pep:known group:AMEL2.0:Group11:9941956:9943449:-1 gene:ENSAPMG00000015843 transcript:ENSAPMT00000021077	9e-94	9	H
SI.CL.0.cl.098.Contig1	gnl|Amel|GB15225-PA	5e-85	chr|NC_007085|NC_007085.2 Chromosome LG16; [Apis mellifera] gi:110825765 chromosome 16 complete sequence	1.24e-26	--	--	--	ens|ENSAPMP00000034140	pep:novel group:AMEL2.0:GroupUn:92945728:92947296:1 gene:ENSAPMG00000012233 transcript:ENSAPMT00000034139	3e-80	2	H
SiJWF03ADB.scf	gnl|Amel|GB12182-PA	2e-71	chr|NC_007073|NC_007073.2 Chromosome LG4; [Apis mellifera] gi:110825768 chromosome 4 complete sequence	6.92e-58	chr|AMe_AADG05001802|AMe_AADG05001802.1	Linkage group 4; [Apis mellifera] draft genome, Amel_4.0.	7e-22	ens|ENSAPMP00000017014	pep:novel group:AMEL2.0:Group4:9430456:9431868:1 gene:ENSAPMG00000016820 transcript:ENSAPMT00000017014	5e-54	6	H
SI.CL.40.cl.4079.Contig1	gnl|Amel|GB10903-PA	2e-70	chr|NC_007080|NC_007080.2 Chromosome LG11; [Apis mellifera] gi:110825732 chromosome 11 complete sequence	5.22e-30	chr|AMe_AADG05004285|AMe_AADG05004285.1	Linkage group 11; [Apis mellifera] draft genome, Amel_4.0.	2e-15	ens|ENSAPMP00000030340	pep:known group:AMEL2.0:Group11:6373169:6374000:1 gene:ENSAPMG00000013352 transcript:ENSAPMT00000030340	6e-68	2	H
SI.CL.42.cl.4209.Contig1	gnl|Amel|GB16889-PA	9e-69	chr|NC_007076|NC_007076.2 Chromosome LG7; [Apis mellifera] gi:110825771 chromosome 7 complete sequence	8.28e-12	--	--	--	ens|ENSAPMP00000023733	pep:novel group:AMEL2.0:Group12:8305230:8310884:-1 gene:ENSAPMG00000006391 transcript:ENSAPMT00000023729	3e-24	9	H
SI.CL.0.cl.033.Contig1	gnl|Amel|GB12633-PA	1e-64	--	--	chr|AMe_AADG05010080|AMe_AADG05010080.1	Linkage group Un; [Apis mellifera] draft genome, Amel_4.0.	7e-30	ens|ENSAPMP00000012613	pep:known group:AMEL2.0:GroupUn:283737526:283739161:1 gene:ENSAPMG00000007225 transcript:ENSAPMT00000012613	7e-63	2	H
SI.CL.22.cl.2254.Contig1	gnl|Amel|GB19567-PA	1e-62	chr|NC_007074|NC_007074.2 Chromosome LG5; [Apis mellifera] gi:110825769 chromosome 5 complete sequence	3.77e-62	--	--	--	--	--	--	--	H
SI.CL.19.cl.1910.Contig1	gnl|Amel|GB12284-PA	2e-50	--	--	chr|AMe_AADG05010010|AMe_AADG05010010.1	Linkage group Un; [Apis mellifera] draft genome, Amel_4.0.	7e-18	ens|ENSAPMP00000035778	pep:known group:AMEL2.0:GroupUn:178436642:178437548:1 gene:ENSAPMG00000001984 transcript:ENSAPMT00000035778	5e-49	2	H
SI.CL.17.cl.1739.Contig1	gnl|Amel|GB15006-PA	2e-50	--	--	--	--	--	ens|ENSAPMP00000020451	pep:novel group:AMEL2.0:GroupUn:41810846:41811460:1 gene:ENSAPMG00000015698 transcript:ENSAPMT00000020446	6e-36	7	H
SiJWD06BAR.scf	gnl|Amel|GB13602-PA	3e-46	chr|NC_007076|NC_007076.2 Chromosome LG7; [Apis mellifera] gi:110825771 chromosome 7 complete sequence	8.83e-20	--	--	--	ens|ENSAPMP00000013025	pep:novel group:AMEL2.0:Group1:11382732:11386304:1 gene:ENSAPMG00000007464 transcript:ENSAPMT00000013025	2e-34	19	H
SiJWA12CAD.scf	gnl|Amel|GB10771-PA	1e-43	--	--	--	--	--	--	--	--	--	H
SI.CL.10.cl.1043.Contig1	gnl|Amel|GB13000-PA	3e-42	chr|NC_007072|NC_007072.2 Chromosome LG3; [Apis mellifera] gi:110825767 chromosome 3 complete sequence	6.21e-38	--	--	--	ens|ENSAPMP00000009504	pep:known group:AMEL2.0:Group3:11751621:11752279:1 gene:ENSAPMG00000005467 transcript:ENSAPMT00000009504	2e-35	2	H
SI.CL.0.cl.044.Contig1	gnl|Amel|GB16664-PA	6e-40	chr|NC_007077|NC_007077.2 Chromosome LG8; [Apis mellifera] gi:110825772 chromosome 8 complete sequence	2.27e-24	chr|AMe_AADG05007888|AMe_AADG05007888.1	Linkage group 8; [Apis mellifera] draft genome, Amel_4.0.	1e-09	ens|ENSAPMP00000028392	pep:novel group:AMEL2.0:GroupUn:28002578:28003689:-1 gene:ENSAPMG00000015787 transcript:ENSAPMT00000028390	3e-38	2	H
SI.CL.1.cl.139.SiJWD04BCZ2.scf	gnl|Amel|GB17325-PA	8e-39	--	--	chr|AMe_AADG05008065|AMe_AADG05008065.1	Linkage group Un; [Apis mellifera] draft genome, Amel_4.0.	8e-16	ens|ENSAPMP00000004712	pep:novel group:AMEL2.0:GroupUn:56176769:56178782:-1 gene:ENSAPMG00000002691 transcript:ENSAPMT00000004712	2e-36	2	H
SI.CL.6.cl.636.Contig1	gnl|Amel|GB17488-PA	3e-38	--	--	chr|AMe_AADG05008400|AMe_AADG05008400.1	Linkage group Un; [Apis mellifera] draft genome, Amel_4.0.	6e-18	ens|ENSAPMP00000032601	pep:novel group:AMEL2.0:GroupUn:51824248:51825040:-1 gene:ENSAPMG00000012841 transcript:ENSAPMT00000032601	2e-36	2	H
SI.CL.10.cl.1028.Contig1	gnl|Amel|GB10329-PA	6e-36	chr|NC_007084|NC_007084.2 Chromosome LG15; [Apis mellifera] gi:110825764 chromosome 15 complete sequence	3.7e-26	chr|AMe_AADG05005340|AMe_AADG05005340.1	Linkage group 15; [Apis mellifera] draft genome, Amel_4.0.	5e-18	ens|ENSAPMP00000034622	pep:novel group:AMEL2.0:Group15:2241487:2242044:1 gene:ENSAPMG00000013070 transcript:ENSAPMT00000034622	6e-27	5	H
SI.CL.12.cl.1260.Contig1	gnl|Amel|GB19856-PA	1e-33	chr|NC_007074|NC_007074.2 Chromosome LG5; [Apis mellifera] gi:110825769 chromosome 5 complete sequence	3.15e-09	--	--	--	ens|ENSAPMP00000018141	pep:novel group:AMEL2.0:Group2:10969466:10971482:1 gene:ENSAPMG00000008333 transcript:ENSAPMT00000018140	7e-32	3	H
SiJWC05CAA.scf	gnl|Amel|GB10776-PA	4e-33	--	--	--	--	--	tr|O61368|O61368_APIME	(Gpdh)Sn-glycerol-3-phosphate dehydrogenase (EC 1.1.1.8).[Apis mellifera]	2e-55	6	H
SI.CL.1.cl.139.Contig1	gnl|Amel|GB17325-PA	6e-32	--	--	chr|AMe_AADG05008065|AMe_AADG05008065.1	Linkage group Un; [Apis mellifera] draft genome, Amel_4.0.	4e-16	ens|ENSAPMP00000004712	pep:novel group:AMEL2.0:GroupUn:56176769:56178782:-1 gene:ENSAPMG00000002691 transcript:ENSAPMT00000004712	2e-30	2	H
SI.CL.8.cl.854.SiJWA02BBR.scf	gnl|Amel|GB12230-PA	6e-28	chr|NC_007079|NC_007079.2 Chromosome LG10; [Apis mellifera] gi:110825711 chromosome 10 complete sequence	7.79e-18	chr|AMe_AADG05003808|AMe_AADG05003808.1	Linkage group 10; [Apis mellifera] draft genome, Amel_4.0.	3e-12	ens|ENSAPMP00000031420	pep:novel group:AMEL2.0:GroupUn:3254210:3255642:1 gene:ENSAPMG00000014916 transcript:ENSAPMT00000031419	2e-26	5	H
SI.CL.8.cl.854.Contig1	gnl|Amel|GB12230-PA	1e-27	chr|NC_007079|NC_007079.2 Chromosome LG10; [Apis mellifera] gi:110825711 chromosome 10 complete sequence	5.97e-18	chr|AMe_AADG05003808|AMe_AADG05003808.1	Linkage group 10; [Apis mellifera] draft genome, Amel_4.0.	2e-12	ens|ENSAPMP00000031420	pep:novel group:AMEL2.0:GroupUn:3254210:3255642:1 gene:ENSAPMG00000014916 transcript:ENSAPMT00000031419	1e-26	5	H
SI.CL.8.cl.854.SiJWA07BCO2.scf	gnl|Amel|GB12230-PA	1e-27	chr|NC_007079|NC_007079.2 Chromosome LG10; [Apis mellifera] gi:110825711 chromosome 10 complete sequence	1.94e-17	chr|AMe_AADG05003808|AMe_AADG05003808.1	Linkage group 10; [Apis mellifera] draft genome, Amel_4.0.	3e-12	ens|ENSAPMP00000031420	pep:novel group:AMEL2.0:GroupUn:3254210:3255642:1 gene:ENSAPMG00000014916 transcript:ENSAPMT00000031419	3e-26	5	H
SiJWA04ACE.scf	gnl|Amel|GB10420-PA	7e-25	--	--	--	--	--	--	--	--	--	H
SI.CL.38.cl.3880.Contig1	gnl|Amel|GB16464-PA	1e-19	chr|NC_007076|NC_007076.2 Chromosome LG7; [Apis mellifera] gi:110825771 chromosome 7 complete sequence	1.23e-14	chr|AMe_AADG05002952|AMe_AADG05002952.1	Linkage group 7; [Apis mellifera] draft genome, Amel_4.0.	8e-06	ens|ENSAPMP00000024456	pep:novel group:AMEL2.0:Group7:8434142:8435333:1 gene:ENSAPMG00000008015 transcript:ENSAPMT00000024452	9e-18	6	H
SI.CL.1.cl.184.Contig1	gnl|Amel|GB10339-PA	1e-17	chr|NC_007071|NC_007071.2 Chromosome LG2; [Apis mellifera] gi:110825766 chromosome 2 complete sequence	1.76e-21	chr|AMe_AADG05000922|AMe_AADG05000922.1	Linkage group 2; [Apis mellifera] draft genome, Amel_4.0.	1e-17	ens|ENSAPMP00000009947	pep:novel group:AMEL2.0:Group2:4494834:4500857:-1 gene:ENSAPMG00000005745 transcript:ENSAPMT00000009947	2e-15	2	H
SiJWC04CAC2.scf	gnl|Amel|GB13719-PA	6e-16	chr|NC_007071|NC_007071.2 Chromosome LG2; [Apis mellifera] gi:110825766 chromosome 2 complete sequence	2.55e-07	--	--	--	--	--	--	--	H
SI.CL.7.cl.793.Contig1	gnl|Amel|GB11029-PA	3e-15	chr|NC_007071|NC_007071.2 Chromosome LG2; [Apis mellifera] gi:110825766 chromosome 2 complete sequence	9.86e-18	--	--	--	ens|ENSAPMP00000019762	pep:novel group:AMEL2.0:Group2:9970331:9990340:1 gene:ENSAPMG00000002525 transcript:ENSAPMT00000019757	6e-16	4	H
SI.CL.38.cl.3822.Contig1	gnl|Amel|GB16628-PA	1e-13	chr|NC_007070|NC_007070.2 Chromosome LG1; [Apis mellifera] gi:110825701 chromosome 1 complete sequence	1.75e-16	--	--	--	ens|ENSAPMP00000012916	pep:known group:AMEL2.0:GroupUn:28696475:28698263:1 gene:ENSAPMG00000007396 transcript:ENSAPMT00000012916	1e-11	2	H
SI.CL.0.cl.024.Contig1	gnl|Amel|GB18323-PA	4e-10	chr|NC_007079|NC_007079.2 Chromosome LG10; [Apis mellifera] gi:110825711 chromosome 10 complete sequence	3.88e-09	--	--	--	sp|P15450|ABAE_APIME	Abaecin precursor.[Apis mellifera]	6e-08	2	H
SiJWH04BDU2.scf	gnl|Amel|GB12332-PA	6e-08	--	--	--	--	--	--	--	--	--	H
SI.CL.20.cl.2035.SiJWH03ACH.scf	gnl|Amel|GB18848-PA	8e-08	chr|NC_007071|NC_007071.2 Chromosome LG2; [Apis mellifera] gi:110825766 chromosome 2 complete sequence	4.99e-12	--	--	--	--	--	--	--	H
SiJWF01BBH.scf	gnl|Amel|GB16579-PA	5e-07	chr|NC_007070|NC_007070.2 Chromosome LG1; [Apis mellifera] gi:110825701 chromosome 1 complete sequence	4.4e-07	chr|AMe_AADG05006620|AMe_AADG05006620.1	Linkage group Un; [Apis mellifera] draft genome, Amel_4.0.	5e-07	--	--	--	--	H
SI.CL.27.cl.2722.SiJWE12BAS.scf	gnl|Amel|GB18848-PA	3e-06	chr|NC_007076|NC_007076.2 Chromosome LG7; [Apis mellifera] gi:110825771 chromosome 7 complete sequence	2.91e-22	--	--	--	--	--	--	--	H
SI.CL.8.cl.846.Contig1	--	--	--	--	--	--	--	--	--	--	--	H
SI.CL.38.cl.3880.SiJWH03BDD2.scf	--	--	--	--	--	--	--	--	--	--	--	H
