# Supplementary material for: An annotated cDNA library and microarray for large-scale gene-expression studies in the ant Solenopsis invicta
Source: Genome Biol. 2007 Jan 15;8(1):R9. doi: 10.1186/gb-2007-8-1-r9 (PMC1839134; doi:10.1186/gb-2007-8-1-r9)
Supplement: Additional data file 2 — All fire ant assembled transcripts with a significant blastn hit to the honey bee genome and no other blastx or blastn hit [file gb-2007-8-1-r9-S2.xls]

## Sheet: Sheet1
Additional data file 2: Putative non protein-coding fire ant assembled sequences exhibiting nucleotide similarity exclusively to Apis mellifera
This list includes all fire ant assembled sequences that fulfilled the following conditions: no blast X hit (E>10e-5), a significant blastn hit to the honey bee genome (E<=10e-5), no blastn hit to any other organism (E>10e-5)
Fire Ant Assembled Sequence	Hit-ID	Hit Description	E-value
SiJWH02AAN.scf	chr|AMe_AADG05004469|AMe_AADG05004469.1	Linkage group 12; [Apis mellifera] draft genome, Amel_4.0.	6e-90
SI.CL.24.cl.2458.SiJWA07BBX.scf	chr|AMe_AADG05006699|AMe_AADG05006699.1	Linkage group Un; [Apis mellifera] draft genome, Amel_4.0.	7e-81
SI.CL.24.cl.2458.Contig1	chr|AMe_AADG05006699|AMe_AADG05006699.1	Linkage group Un; [Apis mellifera] draft genome, Amel_4.0.	3e-77
SiJWE02BBB.scf	chr|AMe_AADG05005010|AMe_AADG05005010.1	Linkage group 14; [Apis mellifera] draft genome, Amel_4.0.	1e-75
SiJWG08CAC2.scf	chr|AMe_AADG05001400|AMe_AADG05001400.1	Linkage group 3; [Apis mellifera] draft genome, Amel_4.0.	2e-75
SiJWF10BDU2.scf	chr|AMe_AADG05000403|AMe_AADG05000403.1	Linkage group 1; [Apis mellifera] draft genome, Amel_4.0.	4e-73
SI.CL.17.cl.1770.Contig1	chr|AMe_AADG05001775|AMe_AADG05001775.1	Linkage group 4; [Apis mellifera] draft genome, Amel_4.0.	5e-72
SiJWE12BDU2.scf	chr|AMe_AADG05002892|AMe_AADG05002892.1	Linkage group 7; [Apis mellifera] draft genome, Amel_4.0.	6e-72
SiJWD08AAA2.scf	chr|AMe_AADG05000202|AMe_AADG05000202.1	Linkage group 1; [Apis mellifera] draft genome, Amel_4.0.	2e-71
SI.CL.40.cl.4003.Contig1	chr|AMe_AADG05000657|AMe_AADG05000657.1	Linkage group 1; [Apis mellifera] draft genome, Amel_4.0.	1e-69
SiJWE12BAM.scf	chr|AMe_AADG05001256|AMe_AADG05001256.1	Linkage group 3; [Apis mellifera] draft genome, Amel_4.0.	2e-68
SiJWG01BDU2.scf	chr|AMe_AADG05011658|AMe_AADG05011658.1	Linkage group 2; [Apis mellifera] draft genome, Amel_4.0.	3e-68
SiJWD04CAQ2.scf	chr|AMe_AADG05001804|AMe_AADG05001804.1	Linkage group 4; [Apis mellifera] draft genome, Amel_4.0.	2e-65
SI.CL.18.cl.1890.Contig1	chr|AMe_AADG05004573|AMe_AADG05004573.1	Linkage group 12; [Apis mellifera] draft genome, Amel_4.0.	7e-63
SiJWB09ADJ.scf	chr|AMe_AADG05008155|AMe_AADG05008155.1	Linkage group Un; [Apis mellifera] draft genome, Amel_4.0.	3e-61
SiJWH12AAZ.scf	chr|AMe_AADG05001775|AMe_AADG05001775.1	Linkage group 4; [Apis mellifera] draft genome, Amel_4.0.	3e-61
SI.CL.33.cl.3311.Contig1	chr|AMe_AADG05005022|AMe_AADG05005022.1	Linkage group 14; [Apis mellifera] draft genome, Amel_4.0.	3e-61
SiJWH09ACX.scf	chr|AMe_AADG05000607|AMe_AADG05000607.1	Linkage group 1; [Apis mellifera] draft genome, Amel_4.0.	3e-61
SI.CL.15.cl.1536.Contig1	chr|AMe_AADG05004520|AMe_AADG05004520.1	Linkage group 12; [Apis mellifera] draft genome, Amel_4.0.	3e-60
SiJWF01ABX.scf	chr|AMe_AADG05016120|AMe_AADG05016120.1	Linkage group Un; [Apis mellifera] draft genome, Amel_4.0.	5e-60
SI.CL.12.cl.1268.Contig1	chr|AMe_AADG05001575|AMe_AADG05001575.1	Linkage group 4; [Apis mellifera] draft genome, Amel_4.0.	3e-58
SiJWA12ACK.scf	chr|AMe_AADG05001441|AMe_AADG05001441.1	Linkage group 3; [Apis mellifera] draft genome, Amel_4.0.	3e-58
SiJWC11BAT.scf	chr|AMe_AADG05005022|AMe_AADG05005022.1	Linkage group 14; [Apis mellifera] draft genome, Amel_4.0.	5e-57
SI.CL.5.cl.597.Contig1	chr|AMe_AADG05001621|AMe_AADG05001621.1	Linkage group 4; [Apis mellifera] draft genome, Amel_4.0.	1e-56
SI.CL.23.cl.2326.Contig1	chr|AMe_AADG05004279|AMe_AADG05004279.1	Linkage group 11; [Apis mellifera] draft genome, Amel_4.0.	6e-56
SiJWE01ACB.scf	chr|AMe_AADG05004464|AMe_AADG05004464.1	Linkage group 12; [Apis mellifera] draft genome, Amel_4.0.	1e-54
SiJWE06BBE.scf	chr|AMe_AADG05004820|AMe_AADG05004820.1	Linkage group 13; [Apis mellifera] draft genome, Amel_4.0.	4e-54
SiJWD05ACQ.scf	chr|AMe_AADG05002448|AMe_AADG05002448.1	Linkage group 6; [Apis mellifera] draft genome, Amel_4.0.	2e-53
SI.CL.2.cl.261.Contig1	chr|AMe_AADG05000361|AMe_AADG05000361.1	Linkage group 1; [Apis mellifera] draft genome, Amel_4.0.	8e-53
SiJWD01ABF.scf	chr|AMe_AADG05001575|AMe_AADG05001575.1	Linkage group 4; [Apis mellifera] draft genome, Amel_4.0.	2e-52
SI.CL.34.cl.3488.Contig1	chr|AMe_AADG05005010|AMe_AADG05005010.1	Linkage group 14; [Apis mellifera] draft genome, Amel_4.0.	3e-51
SiJWF08BBW.scf	chr|AMe_AADG05001621|AMe_AADG05001621.1	Linkage group 4; [Apis mellifera] draft genome, Amel_4.0.	5e-51
SI.CL.14.cl.1448.Contig1	chr|AMe_AADG05014890|AMe_AADG05014890.1	Linkage group Un; [Apis mellifera] draft genome, Amel_4.0.	1e-50
SI.CL.3.cl.327.Contig1	chr|AMe_AADG05000984|AMe_AADG05000984.1	Linkage group 2; [Apis mellifera] draft genome, Amel_4.0.	1e-50
SI.CL.25.cl.2576.Contig1	chr|AMe_AADG05000083|AMe_AADG05000083.1	Linkage group 1; [Apis mellifera] draft genome, Amel_4.0.	2e-50
SiJWH02BBF.scf	chr|AMe_AADG05001880|AMe_AADG05001880.1	Linkage group 5; [Apis mellifera] draft genome, Amel_4.0.	7e-50
SiJWH07CAI2.scf	chr|AMe_AADG05002221|AMe_AADG05002221.1	Linkage group 5; [Apis mellifera] draft genome, Amel_4.0.	8e-50
SiJWA10ADI.scf	chr|AMe_AADG05003717|AMe_AADG05003717.1	Linkage group 10; [Apis mellifera] draft genome, Amel_4.0.	3e-49
SiJWB02CAW.scf	chr|AMe_AADG05005502|AMe_AADG05005502.1	Linkage group 16; [Apis mellifera] draft genome, Amel_4.0.	3e-49
SiJWD09BCO2.scf	chr|AMe_AADG05001442|AMe_AADG05001442.1	Linkage group 3; [Apis mellifera] draft genome, Amel_4.0.	1e-48
SiJWD06BAS.scf	chr|AMe_AADG05000645|AMe_AADG05000645.1	Linkage group 1; [Apis mellifera] draft genome, Amel_4.0.	1e-48
SI.CL.12.cl.1233.Contig1	chr|AMe_AADG05000361|AMe_AADG05000361.1	Linkage group 1; [Apis mellifera] draft genome, Amel_4.0.	1e-47
SiJWA01BCY2.scf	chr|AMe_AADG05006105|AMe_AADG05006105.1	Linkage group Un; [Apis mellifera] draft genome, Amel_4.0.	2e-47
SI.CL.15.cl.1529.SiJWG04AAZ.scf	chr|AMe_AADG05002911|AMe_AADG05002911.1	Linkage group 7; [Apis mellifera] draft genome, Amel_4.0.	2e-46
SiJWA02BAZ2.scf	chr|AMe_AADG05002056|AMe_AADG05002056.1	Linkage group 5; [Apis mellifera] draft genome, Amel_4.0.	3e-46
SI.CL.15.cl.1529.SiJWA10BDF.scf	chr|AMe_AADG05002911|AMe_AADG05002911.1	Linkage group 7; [Apis mellifera] draft genome, Amel_4.0.	3e-46
SI.CL.15.cl.1529.SiJWA11CAU2.scf	chr|AMe_AADG05002911|AMe_AADG05002911.1	Linkage group 7; [Apis mellifera] draft genome, Amel_4.0.	3e-46
SiJWB08ABA.scf	chr|AMe_AADG05017804|AMe_AADG05017804.1	Linkage group Un; [Apis mellifera] draft genome, Amel_4.0.	3e-46
SiJWH01CAM2.scf	chr|AMe_AADG05002541|AMe_AADG05002541.1	Linkage group 6; [Apis mellifera] draft genome, Amel_4.0.	1e-45
SI.CL.31.cl.3146.Contig1	chr|AMe_AADG05002892|AMe_AADG05002892.1	Linkage group 7; [Apis mellifera] draft genome, Amel_4.0.	1e-45
SiJWA10BCI2.scf	chr|AMe_AADG05004186|AMe_AADG05004186.1	Linkage group 11; [Apis mellifera] draft genome, Amel_4.0.	1e-45
SiJWD11BBX.scf	chr|AMe_AADG05000536|AMe_AADG05000536.1	Linkage group 1; [Apis mellifera] draft genome, Amel_4.0.	2e-44
SI.CL.3.cl.359.Contig1	chr|AMe_AADG05003719|AMe_AADG05003719.1	Linkage group 10; [Apis mellifera] draft genome, Amel_4.0.	3e-42
SI.CL.36.cl.3694.Contig1	chr|AMe_AADG05001268|AMe_AADG05001268.1	Linkage group 3; [Apis mellifera] draft genome, Amel_4.0.	3e-42
SI.CL.12.cl.1202.Contig1	chr|AMe_AADG05003587|AMe_AADG05003587.1	Linkage group 9; [Apis mellifera] draft genome, Amel_4.0.	6e-42
SI.CL.4.cl.476.Contig1	chr|AMe_AADG05006048|AMe_AADG05006048.1	Linkage group Un; [Apis mellifera] draft genome, Amel_4.0.	3e-41
SiJWD02ABG.scf	chr|AMe_AADG05005754|AMe_AADG05005754.1	Linkage group 8; [Apis mellifera] draft genome, Amel_4.0.	6e-41
SI.CL.7.cl.756.Contig1	chr|AMe_AADG05000377|AMe_AADG05000377.1	Linkage group 1; [Apis mellifera] draft genome, Amel_4.0.	6e-41
SI.CL.4.cl.469.Contig1	chr|AMe_AADG05002878|AMe_AADG05002878.1	Linkage group 7; [Apis mellifera] draft genome, Amel_4.0.	1e-40
SiJWD10BBI.scf	chr|AMe_AADG05004925|AMe_AADG05004925.1	Linkage group 13; [Apis mellifera] draft genome, Amel_4.0.	2e-40
SiJWE02BBO2.scf	chr|AMe_AADG05002322|AMe_AADG05002322.1	Linkage group 6; [Apis mellifera] draft genome, Amel_4.0.	1e-39
SI.CL.17.cl.1708.Contig1	chr|AMe_AADG05005637|AMe_AADG05005637.1	Linkage group 16; [Apis mellifera] draft genome, Amel_4.0.	3e-39
SiJWE01AAI.scf	chr|AMe_AADG05005010|AMe_AADG05005010.1	Linkage group 14; [Apis mellifera] draft genome, Amel_4.0.	4e-39
SI.CL.19.cl.1922.SiJWB11ABU.scf	chr|AMe_AADG05003867|AMe_AADG05003867.1	Linkage group 10; [Apis mellifera] draft genome, Amel_4.0.	1e-38
SI.CL.37.cl.3766.Contig1	chr|AMe_AADG05001085|AMe_AADG05001085.1	Linkage group 2; [Apis mellifera] draft genome, Amel_4.0.	1e-38
SI.CL.16.cl.1616.Contig1	chr|AMe_AADG05000081|AMe_AADG05000081.1	Linkage group 1; [Apis mellifera] draft genome, Amel_4.0.	3e-38
SiJWA07ACF.scf	chr|AMe_AADG05000770|AMe_AADG05000770.1	Linkage group 2; [Apis mellifera] draft genome, Amel_4.0.	5e-38
SiJWA05ADM.scf	chr|AMe_AADG05001163|AMe_AADG05001163.1	Linkage group 3; [Apis mellifera] draft genome, Amel_4.0.	6e-38
SiJWC01ADK.scf	chr|AMe_AADG05004196|AMe_AADG05004196.1	Linkage group 11; [Apis mellifera] draft genome, Amel_4.0.	6e-38
SiJWH07CAL2.scf	chr|AMe_AADG05007110|AMe_AADG05007110.1	Linkage group Un; [Apis mellifera] draft genome, Amel_4.0.	7e-38
SI.CL.10.cl.1019.Contig2	chr|AMe_AADG05001575|AMe_AADG05001575.1	Linkage group 4; [Apis mellifera] draft genome, Amel_4.0.	2e-37
SI.CL.39.cl.3999.Contig1	chr|AMe_AADG05005003|AMe_AADG05005003.1	Linkage group 14; [Apis mellifera] draft genome, Amel_4.0.	2e-37
SiJWA07ADS.scf	chr|AMe_AADG05005524|AMe_AADG05005524.1	Linkage group 16; [Apis mellifera] draft genome, Amel_4.0.	2e-37
SI.CL.22.cl.2209.Contig1	chr|AMe_AADG05005306|AMe_AADG05005306.1	Linkage group 15; [Apis mellifera] draft genome, Amel_4.0.	2e-37
SI.CL.4.cl.403.Contig1	chr|AMe_AADG05002311|AMe_AADG05002311.1	Linkage group 6; [Apis mellifera] draft genome, Amel_4.0.	1e-36
SiJWC10BDY.scf	chr|AMe_AADG05006134|AMe_AADG05006134.1	Linkage group 7; [Apis mellifera] draft genome, Amel_4.0.	1e-36
SI.CL.42.cl.4255.Contig1	chr|AMe_AADG05003587|AMe_AADG05003587.1	Linkage group 9; [Apis mellifera] draft genome, Amel_4.0.	2e-36
SI.CL.14.cl.1451.Contig1	chr|AMe_AADG05004368|AMe_AADG05004368.1	Linkage group 11; [Apis mellifera] draft genome, Amel_4.0.	3e-36
SiJWD03BBC2.scf	chr|AMe_AADG05005159|AMe_AADG05005159.1	Linkage group 14; [Apis mellifera] draft genome, Amel_4.0.	4e-36
SiJWA05BAO.scf	chr|AMe_AADG05001696|AMe_AADG05001696.1	Linkage group 4; [Apis mellifera] draft genome, Amel_4.0.	4e-36
SiJWG10BBI.scf	chr|AMe_AADG05000602|AMe_AADG05000602.1	Linkage group 1; [Apis mellifera] draft genome, Amel_4.0.	4e-36
SiJWF01ABP2.scf	chr|AMe_AADG05003463|AMe_AADG05003463.1	Linkage group 9; [Apis mellifera] draft genome, Amel_4.0.	4e-36
SiJWC09BAI.scf	chr|AMe_AADG05004851|AMe_AADG05004851.1	Linkage group 13; [Apis mellifera] draft genome, Amel_4.0.	4e-36
SiJWC08ADP.scf	chr|AMe_AADG05003894|AMe_AADG05003894.1	Linkage group 10; [Apis mellifera] draft genome, Amel_4.0.	1e-35
SI.CL.19.cl.1922.Contig1	chr|AMe_AADG05003867|AMe_AADG05003867.1	Linkage group 10; [Apis mellifera] draft genome, Amel_4.0.	2e-35
SiJWH08AAT.scf	chr|AMe_AADG05001853|AMe_AADG05001853.1	Linkage group 5; [Apis mellifera] draft genome, Amel_4.0.	5e-35
SiJWD05ADQ.scf	chr|AMe_AADG05004960|AMe_AADG05004960.1	Linkage group 13; [Apis mellifera] draft genome, Amel_4.0.	2e-34
SiJWE09BCV.scf	chr|AMe_AADG05000915|AMe_AADG05000915.1	Linkage group 2; [Apis mellifera] draft genome, Amel_4.0.	2e-34
SI.CL.20.cl.2008.Contig1	chr|AMe_AADG05002292|AMe_AADG05002292.1	Linkage group 6; [Apis mellifera] draft genome, Amel_4.0.	2e-34
SiJWA03AAW.scf	chr|AMe_AADG05000194|AMe_AADG05000194.1	Linkage group 1; [Apis mellifera] draft genome, Amel_4.0.	2e-34
SiJWA04ADR.scf	chr|AMe_AADG05004245|AMe_AADG05004245.1	Linkage group 11; [Apis mellifera] draft genome, Amel_4.0.	2e-34
SI.CL.15.cl.1522.Contig1	chr|AMe_AADG05005341|AMe_AADG05005341.1	Linkage group 15; [Apis mellifera] draft genome, Amel_4.0.	4e-34
SI.CL.1.cl.166.Contig1	chr|AMe_AADG05003856|AMe_AADG05003856.1	Linkage group 10; [Apis mellifera] draft genome, Amel_4.0.	5e-34
SiJWG09BAI.scf	chr|AMe_AADG05006570|AMe_AADG05006570.1	Linkage group Un; [Apis mellifera] draft genome, Amel_4.0.	8e-34
SiJWD05AAX.scf	chr|AMe_AADG05000942|AMe_AADG05000942.1	Linkage group 2; [Apis mellifera] draft genome, Amel_4.0.	9e-34
SiJWE05ADM.scf	chr|AMe_AADG05004493|AMe_AADG05004493.1	Linkage group 12; [Apis mellifera] draft genome, Amel_4.0.	1e-33
SI.CL.16.cl.1614.Contig1	chr|AMe_AADG05000645|AMe_AADG05000645.1	Linkage group 1; [Apis mellifera] draft genome, Amel_4.0.	3e-33
SiJWC01AAU.scf	chr|AMe_AADG05000607|AMe_AADG05000607.1	Linkage group 1; [Apis mellifera] draft genome, Amel_4.0.	3e-33
SI.CL.35.cl.3521.Contig1	chr|AMe_AADG05000506|AMe_AADG05000506.1	Linkage group 1; [Apis mellifera] draft genome, Amel_4.0.	3e-33
SI.CL.32.cl.3236.Contig1	chr|AMe_AADG05002616|AMe_AADG05002616.1	Linkage group 6; [Apis mellifera] draft genome, Amel_4.0.	4e-33
SiJWA12CAG2.scf	chr|AMe_AADG05005022|AMe_AADG05005022.1	Linkage group 14; [Apis mellifera] draft genome, Amel_4.0.	4e-33
SiJWE05AAK.scf	chr|AMe_AADG05001036|AMe_AADG05001036.1	Linkage group 2; [Apis mellifera] draft genome, Amel_4.0.	1e-32
SiJWB12BCW2.scf	chr|AMe_AADG05005118|AMe_AADG05005118.1	Linkage group 14; [Apis mellifera] draft genome, Amel_4.0.	6e-32
SI.CL.39.cl.3939.Contig1	chr|AMe_AADG05003638|AMe_AADG05003638.1	Linkage group 9; [Apis mellifera] draft genome, Amel_4.0.	2e-31
SI.CL.17.cl.1716.SiJWD12AAY.scf	chr|AMe_AADG05014075|AMe_AADG05014075.1	Linkage group Un; [Apis mellifera] draft genome, Amel_4.0.	2e-31
SI.CL.33.cl.3366.Contig1	chr|AMe_AADG05000550|AMe_AADG05000550.1	Linkage group 1; [Apis mellifera] draft genome, Amel_4.0.	2e-31
SI.CL.17.cl.1707.Contig1	chr|AMe_AADG05002331|AMe_AADG05002331.1	Linkage group 6; [Apis mellifera] draft genome, Amel_4.0.	3e-31
SI.CL.30.cl.3030.Contig1	chr|AMe_AADG05004638|AMe_AADG05004638.1	Linkage group 12; [Apis mellifera] draft genome, Amel_4.0.	6e-31
SiJWH05BDPR5A08.scf	chr|AMe_AADG05006158|AMe_AADG05006158.1	Linkage group 10; [Apis mellifera] draft genome, Amel_4.0.	8e-31
SI.CL.13.cl.1342.Contig1	chr|AMe_AADG05004297|AMe_AADG05004297.1	Linkage group 11; [Apis mellifera] draft genome, Amel_4.0.	8e-31
SiJWC11CAH2.scf	chr|AMe_AADG05004919|AMe_AADG05004919.1	Linkage group 13; [Apis mellifera] draft genome, Amel_4.0.	9e-31
SI.CL.28.cl.2800.Contig1	chr|AMe_AADG05003630|AMe_AADG05003630.1	Linkage group 9; [Apis mellifera] draft genome, Amel_4.0.	4e-30
SI.CL.12.cl.1218.SiJWG03BDA2.scf	chr|AMe_AADG05007408|AMe_AADG05007408.1	Linkage group Un; [Apis mellifera] draft genome, Amel_4.0.	1e-29
SI.CL.10.cl.1001.Contig1	chr|AMe_AADG05006248|AMe_AADG05006248.1	Linkage group 8; [Apis mellifera] draft genome, Amel_4.0.	1e-29
SI.CL.28.cl.2800.SiJWF06BAQ.scf	chr|AMe_AADG05003630|AMe_AADG05003630.1	Linkage group 9; [Apis mellifera] draft genome, Amel_4.0.	1e-29
SI.CL.23.cl.2341.Contig1	chr|AMe_AADG05003852|AMe_AADG05003852.1	Linkage group 10; [Apis mellifera] draft genome, Amel_4.0.	1e-29
SI.CL.27.cl.2721.Contig1	chr|AMe_AADG05005013|AMe_AADG05005013.1	Linkage group 14; [Apis mellifera] draft genome, Amel_4.0.	5e-29
SiJWC11ACR.scf	chr|AMe_AADG05007691|AMe_AADG05007691.1	Linkage group 2; [Apis mellifera] draft genome, Amel_4.0.	5e-29
SI.CL.27.cl.2739.Contig1	chr|AMe_AADG05005022|AMe_AADG05005022.1	Linkage group 14; [Apis mellifera] draft genome, Amel_4.0.	5e-29
SI.CL.7.cl.766.Contig1	chr|AMe_AADG05001562|AMe_AADG05001562.1	Linkage group 4; [Apis mellifera] draft genome, Amel_4.0.	6e-29
SiJWA03CAN2.scf	chr|AMe_AADG05005420|AMe_AADG05005420.1	Linkage group 15; [Apis mellifera] draft genome, Amel_4.0.	6e-29
SI.CL.20.cl.2086.Contig1	chr|AMe_AADG05005397|AMe_AADG05005397.1	Linkage group 15; [Apis mellifera] draft genome, Amel_4.0.	1e-28
SI.CL.27.cl.2744.Contig1	chr|AMe_AADG05005397|AMe_AADG05005397.1	Linkage group 15; [Apis mellifera] draft genome, Amel_4.0.	2e-28
SiJWD10BDI2.scf	chr|AMe_AADG05004386|AMe_AADG05004386.1	Linkage group 11; [Apis mellifera] draft genome, Amel_4.0.	2e-28
SI.CL.25.cl.2535.Contig1	chr|AMe_AADG05006965|AMe_AADG05006965.1	Linkage group Un; [Apis mellifera] draft genome, Amel_4.0.	2e-28
SiJWC06BDW.scf	chr|AMe_AADG05003206|AMe_AADG05003206.1	Linkage group 8; [Apis mellifera] draft genome, Amel_4.0.	2e-28
SiJWC04ABT.scf	chr|AMe_AADG05004814|AMe_AADG05004814.1	Linkage group 13; [Apis mellifera] draft genome, Amel_4.0.	2e-28
SI.CL.37.cl.3774.Contig1	chr|AMe_AADG05002093|AMe_AADG05002093.1	Linkage group 5; [Apis mellifera] draft genome, Amel_4.0.	2e-28
SiJWA04BCD2.scf	chr|AMe_AADG05002429|AMe_AADG05002429.1	Linkage group 6; [Apis mellifera] draft genome, Amel_4.0.	2e-28
SI.CL.27.cl.2795.Contig1	chr|AMe_AADG05002359|AMe_AADG05002359.1	Linkage group 6; [Apis mellifera] draft genome, Amel_4.0.	3e-28
SI.CL.19.cl.1985.SiJWH05ADJ.scf	chr|AMe_AADG05004990|AMe_AADG05004990.1	Linkage group 14; [Apis mellifera] draft genome, Amel_4.0.	8e-28
SiJWD09ABH.scf	chr|AMe_AADG05016364|AMe_AADG05016364.1	Linkage group Un; [Apis mellifera] draft genome, Amel_4.0.	8e-28
SiJWE04BAD.scf	chr|AMe_AADG05002091|AMe_AADG05002091.1	Linkage group 5; [Apis mellifera] draft genome, Amel_4.0.	8e-28
SiJWH06AAQ.scf	chr|AMe_AADG05004101|AMe_AADG05004101.1	Linkage group 11; [Apis mellifera] draft genome, Amel_4.0.	8e-28
SiJWG08CAE.scf	chr|AMe_AADG05005009|AMe_AADG05005009.1	Linkage group 14; [Apis mellifera] draft genome, Amel_4.0.	9e-28
SiJWH06ADY.scf	chr|AMe_AADG05007429|AMe_AADG05007429.1	Linkage group Un; [Apis mellifera] draft genome, Amel_4.0.	3e-27
SI.CL.38.cl.3871.Contig1	chr|AMe_AADG05000586|AMe_AADG05000586.1	Linkage group 1; [Apis mellifera] draft genome, Amel_4.0.	3e-27
SiJWD02ABK.scf	chr|AMe_AADG05003380|AMe_AADG05003380.1	Linkage group 8; [Apis mellifera] draft genome, Amel_4.0.	3e-27
SiJWC06BDT2.scf	chr|AMe_AADG05000586|AMe_AADG05000586.1	Linkage group 1; [Apis mellifera] draft genome, Amel_4.0.	4e-27
SiJWB08BAZ2.scf	chr|AMe_AADG05001380|AMe_AADG05001380.1	Linkage group 3; [Apis mellifera] draft genome, Amel_4.0.	4e-27
SI.CL.39.cl.3912.Contig1	chr|AMe_AADG05003981|AMe_AADG05003981.1	Linkage group 10; [Apis mellifera] draft genome, Amel_4.0.	7e-27
SI.CL.28.cl.2810.Contig1	chr|AMe_AADG05000013|AMe_AADG05000013.1	Linkage group 1; [Apis mellifera] draft genome, Amel_4.0.	9e-27
SiJWH10ABI.scf	chr|AMe_AADG05002051|AMe_AADG05002051.1	Linkage group 5; [Apis mellifera] draft genome, Amel_4.0.	1e-26
SiJWE12ABT.scf	chr|AMe_AADG05007340|AMe_AADG05007340.1	Linkage group 5; [Apis mellifera] draft genome, Amel_4.0.	1e-26
SiJWC12BBM2.scf	chr|AMe_AADG05003513|AMe_AADG05003513.1	Linkage group 9; [Apis mellifera] draft genome, Amel_4.0.	1e-26
SiJWH09BAC.scf	chr|AMe_AADG05001313|AMe_AADG05001313.1	Linkage group 3; [Apis mellifera] draft genome, Amel_4.0.	1e-26
SiJWF03ACX.scf	chr|AMe_AADG05000536|AMe_AADG05000536.1	Linkage group 1; [Apis mellifera] draft genome, Amel_4.0.	1e-26
SI.CL.43.cl.4302.SiJWG09AAC2.scf	chr|AMe_AADG05008784|AMe_AADG05008784.1	Linkage group Un; [Apis mellifera] draft genome, Amel_4.0.	1e-26
SI.CL.38.cl.3866.Contig1	chr|AMe_AADG05002016|AMe_AADG05002016.1	Linkage group 5; [Apis mellifera] draft genome, Amel_4.0.	2e-26
SI.CL.18.cl.1833.SiJWB05BDT2.scf	chr|AMe_AADG05014028|AMe_AADG05014028.1	Linkage group Un; [Apis mellifera] draft genome, Amel_4.0.	5e-26
SiJWB02ADC.scf	chr|AMe_AADG05001090|AMe_AADG05001090.1	Linkage group 2; [Apis mellifera] draft genome, Amel_4.0.	5e-26
SI.CL.7.cl.767.Contig1	chr|AMe_AADG05004196|AMe_AADG05004196.1	Linkage group 11; [Apis mellifera] draft genome, Amel_4.0.	5e-26
SI.CL.28.cl.2810.SiJWE01CAA.scf	chr|AMe_AADG05000013|AMe_AADG05000013.1	Linkage group 1; [Apis mellifera] draft genome, Amel_4.0.	5e-26
SiJWH08ADU.scf	chr|AMe_AADG05002056|AMe_AADG05002056.1	Linkage group 5; [Apis mellifera] draft genome, Amel_4.0.	5e-26
SI.CL.34.cl.3486.SiJWC03AAE.tag5_C03_05.scf	chr|AMe_AADG05013759|AMe_AADG05013759.1	Linkage group Un; [Apis mellifera] draft genome, Amel_4.0.	6e-26
SI.CL.31.cl.3173.Contig1	chr|AMe_AADG05003527|AMe_AADG05003527.1	Linkage group 9; [Apis mellifera] draft genome, Amel_4.0.	6e-26
SI.CL.39.cl.3984.Contig1	chr|AMe_AADG05000423|AMe_AADG05000423.1	Linkage group 1; [Apis mellifera] draft genome, Amel_4.0.	1e-25
SI.CL.36.cl.3634.Contig1	chr|AMe_AADG05004888|AMe_AADG05004888.1	Linkage group 13; [Apis mellifera] draft genome, Amel_4.0.	2e-25
SiJWG10CAX.scf	chr|AMe_AADG05001071|AMe_AADG05001071.1	Linkage group 2; [Apis mellifera] draft genome, Amel_4.0.	2e-25
SiJWF02AEA.scf	chr|AMe_AADG05002398|AMe_AADG05002398.1	Linkage group 6; [Apis mellifera] draft genome, Amel_4.0.	2e-25
SiJWF01BDT2.scf	chr|AMe_AADG05001502|AMe_AADG05001502.1	Linkage group 3; [Apis mellifera] draft genome, Amel_4.0.	2e-25
SI.CL.28.cl.2805.Contig1	chr|AMe_AADG05005080|AMe_AADG05005080.1	Linkage group 14; [Apis mellifera] draft genome, Amel_4.0.	3e-25
SI.CL.3.cl.331.SiJWF10ACA.scf	chr|AMe_AADG05013554|AMe_AADG05013554.1	Linkage group Un; [Apis mellifera] draft genome, Amel_4.0.	6e-25
SI.CL.34.cl.3486.Contig1	chr|AMe_AADG05013759|AMe_AADG05013759.1	Linkage group Un; [Apis mellifera] draft genome, Amel_4.0.	6e-25
SiJWG02ACQ.scf	chr|AMe_AADG05002071|AMe_AADG05002071.1	Linkage group 5; [Apis mellifera] draft genome, Amel_4.0.	7e-25
SiJWB12BCA2.scf	chr|AMe_AADG05002665|AMe_AADG05002665.1	Linkage group 6; [Apis mellifera] draft genome, Amel_4.0.	8e-25
SiJWB02ADI.scf	chr|AMe_AADG05003512|AMe_AADG05003512.1	Linkage group 9; [Apis mellifera] draft genome, Amel_4.0.	8e-25
SiJWH09ABX.scf	chr|AMe_AADG05001909|AMe_AADG05001909.1	Linkage group 5; [Apis mellifera] draft genome, Amel_4.0.	8e-25
SiJWA09BAL.scf	chr|AMe_AADG05007462|AMe_AADG05007462.1	Linkage group Un; [Apis mellifera] draft genome, Amel_4.0.	3e-24
SiJWA04BDX.scf	chr|AMe_AADG05005613|AMe_AADG05005613.1	Linkage group 16; [Apis mellifera] draft genome, Amel_4.0.	4e-24
SI.CL.4.cl.446.SiJWC02CAER7E02.scf	chr|AMe_AADG05010329|AMe_AADG05010329.1	Linkage group 4; [Apis mellifera] draft genome, Amel_4.0.	4e-24
SI.CL.7.cl.739.Contig1	chr|AMe_AADG05013674|AMe_AADG05013674.1	Linkage group 6; [Apis mellifera] draft genome, Amel_4.0.	5e-24
SI.CL.15.cl.1518.Contig1	chr|AMe_AADG05004199|AMe_AADG05004199.1	Linkage group 11; [Apis mellifera] draft genome, Amel_4.0.	7e-24
SI.CL.15.cl.1548.SiJWB02BCXC.tag5_B06_04.scf	chr|AMe_AADG05002842|AMe_AADG05002842.1	Linkage group 7; [Apis mellifera] draft genome, Amel_4.0.	1e-23
SiJWD05BBT.scf	chr|AMe_AADG05002049|AMe_AADG05002049.1	Linkage group 5; [Apis mellifera] draft genome, Amel_4.0.	1e-23
SI.CL.7.cl.766.SiJWA11ACM.scf	chr|AMe_AADG05001562|AMe_AADG05001562.1	Linkage group 4; [Apis mellifera] draft genome, Amel_4.0.	1e-23
SiJWD04ADO.scf	chr|AMe_AADG05002004|AMe_AADG05002004.1	Linkage group 5; [Apis mellifera] draft genome, Amel_4.0.	1e-23
SiJWH03BCP2.scf	chr|AMe_AADG05004808|AMe_AADG05004808.1	Linkage group 13; [Apis mellifera] draft genome, Amel_4.0.	1e-23
SiJWG06CAX.scf	chr|AMe_AADG05000450|AMe_AADG05000450.1	Linkage group 1; [Apis mellifera] draft genome, Amel_4.0.	1e-23
SiJWA05BAP.scf	chr|AMe_AADG05002014|AMe_AADG05002014.1	Linkage group 5; [Apis mellifera] draft genome, Amel_4.0.	1e-23
SiJWH12BDN2.scf	chr|AMe_AADG05005511|AMe_AADG05005511.1	Linkage group 16; [Apis mellifera] draft genome, Amel_4.0.	1e-23
SiJWB05ACL.scf	chr|AMe_AADG05017985|AMe_AADG05017985.1	Linkage group Un; [Apis mellifera] draft genome, Amel_4.0.	4e-23
SI.CL.19.cl.1985.SiJWE03ABG.scf	chr|AMe_AADG05004990|AMe_AADG05004990.1	Linkage group 14; [Apis mellifera] draft genome, Amel_4.0.	5e-23
SiJWE08BAL.scf	chr|AMe_AADG05004347|AMe_AADG05004347.1	Linkage group 11; [Apis mellifera] draft genome, Amel_4.0.	5e-23
SiJWF01ABK.scf	chr|AMe_AADG05001419|AMe_AADG05001419.1	Linkage group 3; [Apis mellifera] draft genome, Amel_4.0.	5e-23
SI.CL.28.cl.2837.Contig1	chr|AMe_AADG05004379|AMe_AADG05004379.1	Linkage group 11; [Apis mellifera] draft genome, Amel_4.0.	1e-22
SI.CL.43.cl.4312.Contig1	chr|AMe_AADG05004919|AMe_AADG05004919.1	Linkage group 13; [Apis mellifera] draft genome, Amel_4.0.	2e-22
SI.CL.13.cl.1328.Contig1	chr|AMe_AADG05004808|AMe_AADG05004808.1	Linkage group 13; [Apis mellifera] draft genome, Amel_4.0.	2e-22
SI.CL.13.cl.1328.SiJWA08AAZ.scf	chr|AMe_AADG05004808|AMe_AADG05004808.1	Linkage group 13; [Apis mellifera] draft genome, Amel_4.0.	2e-22
SiJWH02BBJ2.scf	chr|AMe_AADG05001006|AMe_AADG05001006.1	Linkage group 2; [Apis mellifera] draft genome, Amel_4.0.	2e-22
SiJWG03BDO2.scf	chr|AMe_AADG05006861|AMe_AADG05006861.1	Linkage group Un; [Apis mellifera] draft genome, Amel_4.0.	2e-22
SI.CL.16.cl.1670.SiJWB04CAQ2.scf	chr|AMe_AADG05008294|AMe_AADG05008294.1	Linkage group Un; [Apis mellifera] draft genome, Amel_4.0.	2e-22
SI.CL.16.cl.1670.SiJWE04ABZII.scf	chr|AMe_AADG05008294|AMe_AADG05008294.1	Linkage group Un; [Apis mellifera] draft genome, Amel_4.0.	2e-22
SiJWH12BCL2.scf	chr|AMe_AADG05005045|AMe_AADG05005045.1	Linkage group 14; [Apis mellifera] draft genome, Amel_4.0.	2e-22
SI.CL.16.cl.1670.SiJWF05BBB.scf	chr|AMe_AADG05008294|AMe_AADG05008294.1	Linkage group Un; [Apis mellifera] draft genome, Amel_4.0.	2e-22
SiJWG06ABC.scf	chr|AMe_AADG05001621|AMe_AADG05001621.1	Linkage group 4; [Apis mellifera] draft genome, Amel_4.0.	6e-22
SiJWE05ABF.scf	chr|AMe_AADG05002243|AMe_AADG05002243.1	Linkage group 6; [Apis mellifera] draft genome, Amel_4.0.	6e-22
SiJWF12ADI.scf	chr|AMe_AADG05004717|AMe_AADG05004717.1	Linkage group 12; [Apis mellifera] draft genome, Amel_4.0.	7e-22
SiJWE07AAY.scf	chr|AMe_AADG05006073|AMe_AADG05006073.1	Linkage group 15; [Apis mellifera] draft genome, Amel_4.0.	7e-22
SiJWF03BBA.scf	chr|AMe_AADG05000399|AMe_AADG05000399.1	Linkage group 1; [Apis mellifera] draft genome, Amel_4.0.	8e-22
SiJWE01BBY.scf	chr|AMe_AADG05001895|AMe_AADG05001895.1	Linkage group 5; [Apis mellifera] draft genome, Amel_4.0.	8e-22
SiJWF09AAA2.scf	chr|AMe_AADG05001823|AMe_AADG05001823.1	Linkage group 4; [Apis mellifera] draft genome, Amel_4.0.	9e-22
SI.CL.28.cl.2837.SiJWD08CAI2.scf	chr|AMe_AADG05004379|AMe_AADG05004379.1	Linkage group 11; [Apis mellifera] draft genome, Amel_4.0.	9e-22
SI.CL.6.cl.676.Contig1	chr|AMe_AADG05012489|AMe_AADG05012489.1	Linkage group Un; [Apis mellifera] draft genome, Amel_4.0.	1e-21
SiJWB05ABB.scf	chr|AMe_AADG05004721|AMe_AADG05004721.1	Linkage group 12; [Apis mellifera] draft genome, Amel_4.0.	2e-21
SiJWE08ACC.scf	chr|AMe_AADG05001790|AMe_AADG05001790.1	Linkage group 4; [Apis mellifera] draft genome, Amel_4.0.	3e-21
SI.CL.21.cl.2122.SiJWE02ADE.scf	chr|AMe_AADG05002723|AMe_AADG05002723.1	Linkage group 7; [Apis mellifera] draft genome, Amel_4.0.	3e-21
SiJWD01ADF.scf	chr|AMe_AADG05001600|AMe_AADG05001600.1	Linkage group 4; [Apis mellifera] draft genome, Amel_4.0.	3e-21
SiJWB11AAN.scf	chr|AMe_AADG05001267|AMe_AADG05001267.1	Linkage group 3; [Apis mellifera] draft genome, Amel_4.0.	3e-21
SI.CL.33.cl.3333.Contig1	chr|AMe_AADG05000993|AMe_AADG05000993.1	Linkage group 2; [Apis mellifera] draft genome, Amel_4.0.	3e-21
SiJWG04BDP.scf	chr|AMe_AADG05004869|AMe_AADG05004869.1	Linkage group 13; [Apis mellifera] draft genome, Amel_4.0.	3e-21
SiJWH05ABM.scf	chr|AMe_AADG05003247|AMe_AADG05003247.1	Linkage group 8; [Apis mellifera] draft genome, Amel_4.0.	3e-21
SI.CL.21.cl.2122.SiJWB01AEA.scf	chr|AMe_AADG05002723|AMe_AADG05002723.1	Linkage group 7; [Apis mellifera] draft genome, Amel_4.0.	3e-21
SI.CL.41.cl.4198.SiJWF11CAN2.scf	chr|AMe_AADG05000108|AMe_AADG05000108.1	Linkage group 1; [Apis mellifera] draft genome, Amel_4.0.	3e-21
SiJWG02BDH.scf	chr|AMe_AADG05006196|AMe_AADG05006196.1	Linkage group 3; [Apis mellifera] draft genome, Amel_4.0.	3e-21
SI.CL.31.cl.3120.Contig1	chr|AMe_AADG05011781|AMe_AADG05011781.1	Linkage group Un; [Apis mellifera] draft genome, Amel_4.0.	4e-21
SI.CL.40.cl.4086.Contig1	chr|AMe_AADG05000367|AMe_AADG05000367.1	Linkage group 1; [Apis mellifera] draft genome, Amel_4.0.	6e-21
SI.CL.4.cl.481.Contig1	chr|AMe_AADG05005816|AMe_AADG05005816.1	Linkage group 12; [Apis mellifera] draft genome, Amel_4.0.	8e-21
SI.CL.35.cl.3505.Contig1	chr|AMe_AADG05010905|AMe_AADG05010905.1	Linkage group Un; [Apis mellifera] draft genome, Amel_4.0.	1e-20
SI.CL.10.cl.1098.Contig1	chr|AMe_AADG05001755|AMe_AADG05001755.1	Linkage group 4; [Apis mellifera] draft genome, Amel_4.0.	1e-20
SiJWG09ABP2.scf	chr|AMe_AADG05000400|AMe_AADG05000400.1	Linkage group 1; [Apis mellifera] draft genome, Amel_4.0.	1e-20
SiJWC08ADN.scf	chr|AMe_AADG05003599|AMe_AADG05003599.1	Linkage group 9; [Apis mellifera] draft genome, Amel_4.0.	1e-20
SiJWD04BCH2.scf	chr|AMe_AADG05001586|AMe_AADG05001586.1	Linkage group 4; [Apis mellifera] draft genome, Amel_4.0.	1e-20
SiJWA10BAC.scf	chr|AMe_AADG05000923|AMe_AADG05000923.1	Linkage group 2; [Apis mellifera] draft genome, Amel_4.0.	1e-20
SiJWC02BAY2.scf	chr|AMe_AADG05002981|AMe_AADG05002981.1	Linkage group 7; [Apis mellifera] draft genome, Amel_4.0.	1e-20
SI.CL.32.cl.3242.Contig1	chr|AMe_AADG05000204|AMe_AADG05000204.1	Linkage group 1; [Apis mellifera] draft genome, Amel_4.0.	2e-20
SiJWH01ADN.scf	chr|AMe_AADG05003298|AMe_AADG05003298.1	Linkage group 8; [Apis mellifera] draft genome, Amel_4.0.	4e-20
SiJWA05ACM.scf	chr|AMe_AADG05006659|AMe_AADG05006659.1	Linkage group Un; [Apis mellifera] draft genome, Amel_4.0.	4e-20
SI.CL.43.cl.4313.Contig1	chr|AMe_AADG05017068|AMe_AADG05017068.1	Linkage group Un; [Apis mellifera] draft genome, Amel_4.0.	4e-20
SI.CL.28.cl.2815.Contig1	chr|AMe_AADG05005972|AMe_AADG05005972.1	Linkage group 16; [Apis mellifera] draft genome, Amel_4.0.	4e-20
SiJWF01CAT2.scf	chr|AMe_AADG05004140|AMe_AADG05004140.1	Linkage group 11; [Apis mellifera] draft genome, Amel_4.0.	5e-20
SI.CL.23.cl.2390.Contig1	chr|AMe_AADG05001728|AMe_AADG05001728.1	Linkage group 4; [Apis mellifera] draft genome, Amel_4.0.	6e-20
SI.CL.22.cl.2267.Contig1	chr|AMe_AADG05005035|AMe_AADG05005035.1	Linkage group 14; [Apis mellifera] draft genome, Amel_4.0.	1e-19
SI.CL.14.cl.1485.SiJWF02BBR.scf	chr|AMe_AADG05011362|AMe_AADG05011362.1	Linkage group Un; [Apis mellifera] draft genome, Amel_4.0.	2e-19
SI.CL.14.cl.1496.Contig1	chr|AMe_AADG05002303|AMe_AADG05002303.1	Linkage group 6; [Apis mellifera] draft genome, Amel_4.0.	2e-19
SiJWH05BAS.scf	chr|AMe_AADG05001515|AMe_AADG05001515.1	Linkage group 3; [Apis mellifera] draft genome, Amel_4.0.	2e-19
SI.CL.3.cl.348.Contig1	chr|AMe_AADG05000853|AMe_AADG05000853.1	Linkage group 2; [Apis mellifera] draft genome, Amel_4.0.	2e-19
SiJWE09BCN2.scf	chr|AMe_AADG05005514|AMe_AADG05005514.1	Linkage group 16; [Apis mellifera] draft genome, Amel_4.0.	2e-19
SiJWC10CAV.scf	chr|AMe_AADG05008630|AMe_AADG05008630.1	Linkage group 11; [Apis mellifera] draft genome, Amel_4.0.	2e-19
SiJWD02ADK.scf	chr|AMe_AADG05000447|AMe_AADG05000447.1	Linkage group 1; [Apis mellifera] draft genome, Amel_4.0.	2e-19
SI.CL.18.cl.1831.Contig1	chr|AMe_AADG05005026|AMe_AADG05005026.1	Linkage group 14; [Apis mellifera] draft genome, Amel_4.0.	3e-19
SI.CL.41.cl.4107.Contig1	chr|AMe_AADG05005500|AMe_AADG05005500.1	Linkage group 16; [Apis mellifera] draft genome, Amel_4.0.	5e-19
SiJWH04BAM.scf	chr|AMe_AADG05004518|AMe_AADG05004518.1	Linkage group 12; [Apis mellifera] draft genome, Amel_4.0.	7e-19
SiJWD09BAQ.scf	chr|AMe_AADG05004658|AMe_AADG05004658.1	Linkage group 12; [Apis mellifera] draft genome, Amel_4.0.	7e-19
SI.CL.7.cl.762.Contig1	chr|AMe_AADG05005974|AMe_AADG05005974.1	Linkage group 16; [Apis mellifera] draft genome, Amel_4.0.	7e-19
SiJWC10CAT2.scf	chr|AMe_AADG05000994|AMe_AADG05000994.1	Linkage group 2; [Apis mellifera] draft genome, Amel_4.0.	8e-19
SiJWC12CAN2.scf	chr|AMe_AADG05000107|AMe_AADG05000107.1	Linkage group 1; [Apis mellifera] draft genome, Amel_4.0.	8e-19
SiJWF01BBC2.scf	chr|AMe_AADG05002385|AMe_AADG05002385.1	Linkage group 6; [Apis mellifera] draft genome, Amel_4.0.	8e-19
SiJWC09AAM.scf	chr|AMe_AADG05001015|AMe_AADG05001015.1	Linkage group 2; [Apis mellifera] draft genome, Amel_4.0.	8e-19
SiJWG07CAER7F02.scf	chr|AMe_AADG05005651|AMe_AADG05005651.1	Linkage group 16; [Apis mellifera] draft genome, Amel_4.0.	8e-19
SiJWG12ABI.scf	chr|AMe_AADG05006372|AMe_AADG05006372.1	Linkage group 11; [Apis mellifera] draft genome, Amel_4.0.	8e-19
SI.CL.42.cl.4231.Contig1	chr|AMe_AADG05000192|AMe_AADG05000192.1	Linkage group 1; [Apis mellifera] draft genome, Amel_4.0.	9e-19
SI.CL.25.cl.2530.Contig1	chr|AMe_AADG05003503|AMe_AADG05003503.1	Linkage group 9; [Apis mellifera] draft genome, Amel_4.0.	9e-19
SI.CL.30.cl.3042.Contig1	chr|AMe_AADG05003629|AMe_AADG05003629.1	Linkage group 9; [Apis mellifera] draft genome, Amel_4.0.	2e-18
SI.CL.3.cl.321.Contig1	chr|AMe_AADG05000760|AMe_AADG05000760.1	Linkage group 1; [Apis mellifera] draft genome, Amel_4.0.	2e-18
SI.CL.15.cl.1553.SiJWA01BDOC.scf	chr|AMe_AADG05002063|AMe_AADG05002063.1	Linkage group 5; [Apis mellifera] draft genome, Amel_4.0.	3e-18
SI.CL.15.cl.1553.SiJWA01BDO2.scf	chr|AMe_AADG05002063|AMe_AADG05002063.1	Linkage group 5; [Apis mellifera] draft genome, Amel_4.0.	3e-18
SI.CL.20.cl.2060.Contig1	chr|AMe_AADG05003042|AMe_AADG05003042.1	Linkage group 8; [Apis mellifera] draft genome, Amel_4.0.	3e-18
SiJWF12BBX.scf	chr|AMe_AADG05004727|AMe_AADG05004727.1	Linkage group 12; [Apis mellifera] draft genome, Amel_4.0.	3e-18
SI.CL.15.cl.1553.SiJWD07ACY.scf	chr|AMe_AADG05002063|AMe_AADG05002063.1	Linkage group 5; [Apis mellifera] draft genome, Amel_4.0.	3e-18
SiJWD03AAT.scf	chr|AMe_AADG05003206|AMe_AADG05003206.1	Linkage group 8; [Apis mellifera] draft genome, Amel_4.0.	3e-18
SiJWE04CAA.scf	chr|AMe_AADG05004535|AMe_AADG05004535.1	Linkage group 12; [Apis mellifera] draft genome, Amel_4.0.	3e-18
SiJWD12AAA2.scf	chr|AMe_AADG05010581|AMe_AADG05010581.1	Linkage group Un; [Apis mellifera] draft genome, Amel_4.0.	3e-18
SI.CL.18.cl.1844.SiJWE12BCT3.scf	chr|AMe_AADG05000773|AMe_AADG05000773.1	Linkage group 2; [Apis mellifera] draft genome, Amel_4.0.	3e-18
SI.CL.15.cl.1550.Contig1	chr|AMe_AADG05001986|AMe_AADG05001986.1	Linkage group 5; [Apis mellifera] draft genome, Amel_4.0.	5e-18
SI.CL.37.cl.3765.Contig1	chr|AMe_AADG05001815|AMe_AADG05001815.1	Linkage group 4; [Apis mellifera] draft genome, Amel_4.0.	7e-18
SiJWF09BDI2.scf	chr|AMe_AADG05007297|AMe_AADG05007297.1	Linkage group 12; [Apis mellifera] draft genome, Amel_4.0.	1e-17
SiJWB03ABM.scf	chr|AMe_AADG05000024|AMe_AADG05000024.1	Linkage group 1; [Apis mellifera] draft genome, Amel_4.0.	1e-17
SiJWE07BCO2.scf	chr|AMe_AADG05009413|AMe_AADG05009413.1	Linkage group Un; [Apis mellifera] draft genome, Amel_4.0.	1e-17
SiJWC12ABV.scf	chr|AMe_AADG05003201|AMe_AADG05003201.1	Linkage group 8; [Apis mellifera] draft genome, Amel_4.0.	1e-17
SI.CL.0.cl.061.Contig1	chr|AMe_AADG05002952|AMe_AADG05002952.1	Linkage group 7; [Apis mellifera] draft genome, Amel_4.0.	1e-17
SI.CL.6.cl.665.Contig1	chr|AMe_AADG05003205|AMe_AADG05003205.1	Linkage group 8; [Apis mellifera] draft genome, Amel_4.0.	1e-17
SI.CL.21.cl.2175.SiJWE04ADH.scf	chr|AMe_AADG05001754|AMe_AADG05001754.1	Linkage group 4; [Apis mellifera] draft genome, Amel_4.0.	4e-17
SI.CL.41.cl.4125.Contig1	chr|AMe_AADG05005015|AMe_AADG05005015.1	Linkage group 14; [Apis mellifera] draft genome, Amel_4.0.	4e-17
SiJWB06BCZ2.scf	chr|AMe_AADG05004925|AMe_AADG05004925.1	Linkage group 13; [Apis mellifera] draft genome, Amel_4.0.	5e-17
SiJWE05BCC.tag5_E05_09.scf	chr|AMe_AADG05001575|AMe_AADG05001575.1	Linkage group 4; [Apis mellifera] draft genome, Amel_4.0.	5e-17
SiJWF04BDW.scf	chr|AMe_AADG05005777|AMe_AADG05005777.1	Linkage group 13; [Apis mellifera] draft genome, Amel_4.0.	6e-17
SI.CL.24.cl.2481.Contig1	chr|AMe_AADG05002323|AMe_AADG05002323.1	Linkage group 6; [Apis mellifera] draft genome, Amel_4.0.	6e-17
SI.CL.41.cl.4114.Contig1	chr|AMe_AADG05000824|AMe_AADG05000824.1	Linkage group 2; [Apis mellifera] draft genome, Amel_4.0.	7e-17
SiJWC07AA1_evro_C10_3prime.scf	chr|AMe_AADG05002063|AMe_AADG05002063.1	Linkage group 5; [Apis mellifera] draft genome, Amel_4.0.	9e-17
SI.CL.28.cl.2899.Contig1	chr|AMe_AADG05000455|AMe_AADG05000455.1	Linkage group 1; [Apis mellifera] draft genome, Amel_4.0.	2e-16
SI.CL.36.cl.3656.Contig1	chr|AMe_AADG05004258|AMe_AADG05004258.1	Linkage group 11; [Apis mellifera] draft genome, Amel_4.0.	2e-16
SiJWE12AAT.scf	chr|AMe_AADG05007028|AMe_AADG05007028.1	Linkage group 1; [Apis mellifera] draft genome, Amel_4.0.	2e-16
SI.CL.15.cl.1522.SiJWD08AAZ.scf	chr|AMe_AADG05005341|AMe_AADG05005341.1	Linkage group 15; [Apis mellifera] draft genome, Amel_4.0.	2e-16
SiJWE11BCZ2.scf	chr|AMe_AADG05004772|AMe_AADG05004772.1	Linkage group 13; [Apis mellifera] draft genome, Amel_4.0.	2e-16
SiJWB06CAJ2.scf	chr|AMe_AADG05000107|AMe_AADG05000107.1	Linkage group 1; [Apis mellifera] draft genome, Amel_4.0.	2e-16
SiJWH07BEA.scf	chr|AMe_AADG05003705|AMe_AADG05003705.1	Linkage group 9; [Apis mellifera] draft genome, Amel_4.0.	2e-16
SiJWA07ABH.scf	chr|AMe_AADG05003065|AMe_AADG05003065.1	Linkage group 8; [Apis mellifera] draft genome, Amel_4.0.	2e-16
SI.CL.17.cl.1769.Contig1	chr|AMe_AADG05007562|AMe_AADG05007562.1	Linkage group Un; [Apis mellifera] draft genome, Amel_4.0.	4e-16
SiJWF09AAN.scf	chr|AMe_AADG05001896|AMe_AADG05001896.1	Linkage group 5; [Apis mellifera] draft genome, Amel_4.0.	6e-16
SiJWC08ADQ.scf	chr|AMe_AADG05003448|AMe_AADG05003448.1	Linkage group 9; [Apis mellifera] draft genome, Amel_4.0.	6e-16
SI.CL.36.cl.3690.Contig1	chr|AMe_AADG05002303|AMe_AADG05002303.1	Linkage group 6; [Apis mellifera] draft genome, Amel_4.0.	6e-16
SiJWC03ACL.scf	chr|AMe_AADG05004768|AMe_AADG05004768.1	Linkage group 13; [Apis mellifera] draft genome, Amel_4.0.	6e-16
SiJWF03ACC.scf	chr|AMe_AADG05004380|AMe_AADG05004380.1	Linkage group 11; [Apis mellifera] draft genome, Amel_4.0.	6e-16
SiJWE08AAN.scf	chr|AMe_AADG05006773|AMe_AADG05006773.1	Linkage group 1; [Apis mellifera] draft genome, Amel_4.0.	6e-16
SiJWD06ABR.scf	chr|AMe_AADG05006723|AMe_AADG05006723.1	Linkage group Un; [Apis mellifera] draft genome, Amel_4.0.	7e-16
SI.CL.14.cl.1441.Contig1	chr|AMe_AADG05001256|AMe_AADG05001256.1	Linkage group 3; [Apis mellifera] draft genome, Amel_4.0.	7e-16
SiJWD03BCL2.scf	chr|AMe_AADG05004173|AMe_AADG05004173.1	Linkage group 11; [Apis mellifera] draft genome, Amel_4.0.	8e-16
SiJWA09BCC.tag5_A09_01.scf	chr|AMe_AADG05003867|AMe_AADG05003867.1	Linkage group 10; [Apis mellifera] draft genome, Amel_4.0.	8e-16
SiJWG03BDM2.scf	chr|AMe_AADG05005007|AMe_AADG05005007.1	Linkage group 14; [Apis mellifera] draft genome, Amel_4.0.	8e-16
SiJWH05BDV2.scf	chr|AMe_AADG05001985|AMe_AADG05001985.1	Linkage group 5; [Apis mellifera] draft genome, Amel_4.0.	8e-16
SI.CL.30.cl.3065.Contig1	chr|AMe_AADG05003901|AMe_AADG05003901.1	Linkage group 10; [Apis mellifera] draft genome, Amel_4.0.	1e-15
SI.CL.32.cl.3225.Contig1	chr|AMe_AADG05002016|AMe_AADG05002016.1	Linkage group 5; [Apis mellifera] draft genome, Amel_4.0.	2e-15
SI.CL.42.cl.4251.Contig1	chr|AMe_AADG05001498|AMe_AADG05001498.1	Linkage group 3; [Apis mellifera] draft genome, Amel_4.0.	2e-15
SI.CL.16.cl.1635.Contig1	chr|AMe_AADG05004570|AMe_AADG05004570.1	Linkage group 12; [Apis mellifera] draft genome, Amel_4.0.	2e-15
SI.CL.33.cl.3373.Contig1	chr|AMe_AADG05006048|AMe_AADG05006048.1	Linkage group Un; [Apis mellifera] draft genome, Amel_4.0.	2e-15
SiJWH03AAN.scf	chr|AMe_AADG05000500|AMe_AADG05000500.1	Linkage group 1; [Apis mellifera] draft genome, Amel_4.0.	2e-15
SI.CL.23.cl.2382.Contig1	chr|AMe_AADG05001380|AMe_AADG05001380.1	Linkage group 3; [Apis mellifera] draft genome, Amel_4.0.	2e-15
SI.CL.30.cl.3099.Contig1	chr|AMe_AADG05000310|AMe_AADG05000310.1	Linkage group 1; [Apis mellifera] draft genome, Amel_4.0.	2e-15
SI.CL.42.cl.4292.SiJWG01BDHR4D08.scf	chr|AMe_AADG05003473|AMe_AADG05003473.1	Linkage group 9; [Apis mellifera] draft genome, Amel_4.0.	3e-15
SiJWC11BBZ.scf	chr|AMe_AADG05000535|AMe_AADG05000535.1	Linkage group 1; [Apis mellifera] draft genome, Amel_4.0.	3e-15
SI.CL.23.cl.2382.SiJWB05ADN.scf	chr|AMe_AADG05001380|AMe_AADG05001380.1	Linkage group 3; [Apis mellifera] draft genome, Amel_4.0.	3e-15
SiJWG07ADL.scf	chr|AMe_AADG05001809|AMe_AADG05001809.1	Linkage group 4; [Apis mellifera] draft genome, Amel_4.0.	3e-15
SI.CL.30.cl.3099.SiJWG08BAZ2.scf	chr|AMe_AADG05000310|AMe_AADG05000310.1	Linkage group 1; [Apis mellifera] draft genome, Amel_4.0.	3e-15
SiJWC06BBR.scf	chr|AMe_AADG05016120|AMe_AADG05016120.1	Linkage group Un; [Apis mellifera] draft genome, Amel_4.0.	3e-15
SiJWG10CAJ2.scf	chr|AMe_AADG05006869|AMe_AADG05006869.1	Linkage group Un; [Apis mellifera] draft genome, Amel_4.0.	3e-15
SiJWE04BAA2.scf	chr|AMe_AADG05000600|AMe_AADG05000600.1	Linkage group 1; [Apis mellifera] draft genome, Amel_4.0.	3e-15
SiJWB11BCH2.scf	chr|AMe_AADG05000098|AMe_AADG05000098.1	Linkage group 1; [Apis mellifera] draft genome, Amel_4.0.	3e-15
SI.CL.31.cl.3152.SiJWG10BBR.scf	chr|AMe_AADG05001106|AMe_AADG05001106.1	Linkage group 2; [Apis mellifera] draft genome, Amel_4.0.	3e-15
SI.CL.20.cl.2095.Contig1	chr|AMe_AADG05001495|AMe_AADG05001495.1	Linkage group 3; [Apis mellifera] draft genome, Amel_4.0.	5e-15
SI.CL.23.cl.2315.Contig1	chr|AMe_AADG05005447|AMe_AADG05005447.1	Linkage group 15; [Apis mellifera] draft genome, Amel_4.0.	6e-15
SI.CL.29.cl.2916.Contig1	chr|AMe_AADG05003023|AMe_AADG05003023.1	Linkage group 8; [Apis mellifera] draft genome, Amel_4.0.	8e-15
SI.CL.24.cl.2432.Contig1	chr|AMe_AADG05008400|AMe_AADG05008400.1	Linkage group Un; [Apis mellifera] draft genome, Amel_4.0.	8e-15
SI.CL.40.cl.4020.Contig1	chr|AMe_AADG05001192|AMe_AADG05001192.1	Linkage group 3; [Apis mellifera] draft genome, Amel_4.0.	8e-15
SiJWB10CAM2.scf	chr|AMe_AADG05002323|AMe_AADG05002323.1	Linkage group 6; [Apis mellifera] draft genome, Amel_4.0.	1e-14
SI.CL.11.cl.1180.Contig1	chr|AMe_AADG05006241|AMe_AADG05006241.1	Linkage group 7; [Apis mellifera] draft genome, Amel_4.0.	1e-14
SiJWC01ACT.scf	chr|AMe_AADG05004884|AMe_AADG05004884.1	Linkage group 13; [Apis mellifera] draft genome, Amel_4.0.	1e-14
SiJWF01BBU.scf	chr|AMe_AADG05001494|AMe_AADG05001494.1	Linkage group 3; [Apis mellifera] draft genome, Amel_4.0.	1e-14
SI.CL.1.cl.108.SiJWC10ADB.scf	chr|AMe_AADG05003971|AMe_AADG05003971.1	Linkage group 10; [Apis mellifera] draft genome, Amel_4.0.	1e-14
SiJWC12BBT.scf	chr|AMe_AADG05005445|AMe_AADG05005445.1	Linkage group 15; [Apis mellifera] draft genome, Amel_4.0.	1e-14
SI.CL.40.cl.4004.Contig1	chr|AMe_AADG05010329|AMe_AADG05010329.1	Linkage group 4; [Apis mellifera] draft genome, Amel_4.0.	1e-14
SiJWC12ADM.scf	chr|AMe_AADG05004723|AMe_AADG05004723.1	Linkage group 12; [Apis mellifera] draft genome, Amel_4.0.	1e-14
SiJWH12CAQ2.scf	chr|AMe_AADG05001905|AMe_AADG05001905.1	Linkage group 5; [Apis mellifera] draft genome, Amel_4.0.	1e-14
SiJWH01BDB2.scf	chr|AMe_AADG05006197|AMe_AADG05006197.1	Linkage group 3; [Apis mellifera] draft genome, Amel_4.0.	1e-14
SI.CL.2.cl.286.Contig1	chr|AMe_AADG05007627|AMe_AADG05007627.1	Linkage group Un; [Apis mellifera] draft genome, Amel_4.0.	1e-14
SI.CL.40.cl.4087.Contig1	chr|AMe_AADG05005612|AMe_AADG05005612.1	Linkage group 16; [Apis mellifera] draft genome, Amel_4.0.	2e-14
SI.CL.3.cl.397.Contig1	chr|AMe_AADG05007568|AMe_AADG05007568.1	Linkage group Un; [Apis mellifera] draft genome, Amel_4.0.	3e-14
SI.CL.34.cl.3436.Contig1	chr|AMe_AADG05004368|AMe_AADG05004368.1	Linkage group 11; [Apis mellifera] draft genome, Amel_4.0.	4e-14
SiJWB01ACV.scf	chr|AMe_AADG05007124|AMe_AADG05007124.1	Linkage group Un; [Apis mellifera] draft genome, Amel_4.0.	4e-14
SiJWC09ACY.scf	chr|AMe_AADG05000764|AMe_AADG05000764.1	Linkage group 1; [Apis mellifera] draft genome, Amel_4.0.	4e-14
SiJWE12BAP.scf	chr|AMe_AADG05001573|AMe_AADG05001573.1	Linkage group 4; [Apis mellifera] draft genome, Amel_4.0.	4e-14
SI.CL.6.cl.669.SiJWC02ACR.scf	chr|AMe_AADG05003581|AMe_AADG05003581.1	Linkage group 9; [Apis mellifera] draft genome, Amel_4.0.	4e-14
SiJWC12ACA.scf	chr|AMe_AADG05001267|AMe_AADG05001267.1	Linkage group 3; [Apis mellifera] draft genome, Amel_4.0.	4e-14
SI.CL.22.cl.2263.SiJWH10BCA2.scf	chr|AMe_AADG05002638|AMe_AADG05002638.1	Linkage group 6; [Apis mellifera] draft genome, Amel_4.0.	5e-14
SiJWC06CAW.scf	chr|AMe_AADG05006830|AMe_AADG05006830.1	Linkage group 6; [Apis mellifera] draft genome, Amel_4.0.	5e-14
SiJWE02CACC.tag5_E10_10.scf	chr|AMe_AADG05006088|AMe_AADG05006088.1	Linkage group Un; [Apis mellifera] draft genome, Amel_4.0.	5e-14
SiJWC04BDW.scf	chr|AMe_AADG05012371|AMe_AADG05012371.1	Linkage group Un; [Apis mellifera] draft genome, Amel_4.0.	5e-14
SI.CL.41.cl.4171.SiJWD12BDE2.scf	chr|AMe_AADG05003997|AMe_AADG05003997.1	Linkage group 10; [Apis mellifera] draft genome, Amel_4.0.	5e-14
SiJWH02BDW.scf	chr|AMe_AADG05000740|AMe_AADG05000740.1	Linkage group 1; [Apis mellifera] draft genome, Amel_4.0.	5e-14
SiJWF03BAH.scf	chr|AMe_AADG05000740|AMe_AADG05000740.1	Linkage group 1; [Apis mellifera] draft genome, Amel_4.0.	5e-14
SI.CL.31.cl.3146.SiJWH11BBX.scf	chr|AMe_AADG05002892|AMe_AADG05002892.1	Linkage group 7; [Apis mellifera] draft genome, Amel_4.0.	5e-14
SI.CL.27.cl.2756.Contig1	chr|AMe_AADG05000993|AMe_AADG05000993.1	Linkage group 2; [Apis mellifera] draft genome, Amel_4.0.	7e-14
SI.CL.26.cl.2684.Contig1	chr|AMe_AADG05005467|AMe_AADG05005467.1	Linkage group 15; [Apis mellifera] draft genome, Amel_4.0.	7e-14
SI.CL.27.cl.2787.Contig1	chr|AMe_AADG05007580|AMe_AADG05007580.1	Linkage group Un; [Apis mellifera] draft genome, Amel_4.0.	1e-13
SI.CL.20.cl.2082.Contig1	chr|AMe_AADG05004771|AMe_AADG05004771.1	Linkage group 13; [Apis mellifera] draft genome, Amel_4.0.	1e-13
SI.CL.23.cl.2366.Contig1	chr|AMe_AADG05000824|AMe_AADG05000824.1	Linkage group 2; [Apis mellifera] draft genome, Amel_4.0.	1e-13
SI.CL.7.cl.730.Contig1	chr|AMe_AADG05005757|AMe_AADG05005757.1	Linkage group 8; [Apis mellifera] draft genome, Amel_4.0.	1e-13
SI.CL.19.cl.1948.Contig1	chr|AMe_AADG05004962|AMe_AADG05004962.1	Linkage group 13; [Apis mellifera] draft genome, Amel_4.0.	2e-13
SiJWG04ABN.scf	chr|AMe_AADG05002835|AMe_AADG05002835.1	Linkage group 7; [Apis mellifera] draft genome, Amel_4.0.	2e-13
SiJWB05BDM2.scf	chr|AMe_AADG05006128|AMe_AADG05006128.1	Linkage group 14; [Apis mellifera] draft genome, Amel_4.0.	2e-13
SI.CL.10.cl.1008.Contig1	chr|AMe_AADG05003973|AMe_AADG05003973.1	Linkage group 10; [Apis mellifera] draft genome, Amel_4.0.	2e-13
SiJWB10ADV.scf	chr|AMe_AADG05007222|AMe_AADG05007222.1	Linkage group Un; [Apis mellifera] draft genome, Amel_4.0.	2e-13
SiJWB08BAVR1A06.scf	chr|AMe_AADG05001309|AMe_AADG05001309.1	Linkage group 3; [Apis mellifera] draft genome, Amel_4.0.	2e-13
SiJWA05BDA2.scf	chr|AMe_AADG05004330|AMe_AADG05004330.1	Linkage group 11; [Apis mellifera] draft genome, Amel_4.0.	2e-13
SiJWC04AAZ.scf	chr|AMe_AADG05003730|AMe_AADG05003730.1	Linkage group 10; [Apis mellifera] draft genome, Amel_4.0.	2e-13
SI.CL.40.cl.4083.Contig1	chr|AMe_AADG05003852|AMe_AADG05003852.1	Linkage group 10; [Apis mellifera] draft genome, Amel_4.0.	3e-13
SI.CL.0.cl.011.Contig1	chr|AMe_AADG05000522|AMe_AADG05000522.1	Linkage group 1; [Apis mellifera] draft genome, Amel_4.0.	3e-13
SI.CL.37.cl.3787.Contig1	chr|AMe_AADG05004071|AMe_AADG05004071.1	Linkage group 11; [Apis mellifera] draft genome, Amel_4.0.	5e-13
SI.CL.30.cl.3078.Contig1	chr|AMe_AADG05000550|AMe_AADG05000550.1	Linkage group 1; [Apis mellifera] draft genome, Amel_4.0.	6e-13
SiJWE05BDL2.scf	chr|AMe_AADG05001020|AMe_AADG05001020.1	Linkage group 2; [Apis mellifera] draft genome, Amel_4.0.	6e-13
SiJWE06CAK2.scf	chr|AMe_AADG05005410|AMe_AADG05005410.1	Linkage group 15; [Apis mellifera] draft genome, Amel_4.0.	7e-13
SiJWF07ABQ.scf	chr|AMe_AADG05001016|AMe_AADG05001016.1	Linkage group 2; [Apis mellifera] draft genome, Amel_4.0.	7e-13
SI.CL.25.cl.2524.Contig1	chr|AMe_AADG05002316|AMe_AADG05002316.1	Linkage group 6; [Apis mellifera] draft genome, Amel_4.0.	7e-13
SI.CL.31.cl.3196.Contig1	chr|AMe_AADG05003160|AMe_AADG05003160.1	Linkage group 8; [Apis mellifera] draft genome, Amel_4.0.	7e-13
SiJWE10BBP.scf	chr|AMe_AADG05001001|AMe_AADG05001001.1	Linkage group 2; [Apis mellifera] draft genome, Amel_4.0.	7e-13
SiJWD10BBZ.scf	chr|AMe_AADG05004684|AMe_AADG05004684.1	Linkage group 12; [Apis mellifera] draft genome, Amel_4.0.	7e-13
SiJWC05BAE.scf	chr|AMe_AADG05004972|AMe_AADG05004972.1	Linkage group 13; [Apis mellifera] draft genome, Amel_4.0.	7e-13
SiJWG04CAO2.scf	chr|AMe_AADG05003955|AMe_AADG05003955.1	Linkage group 10; [Apis mellifera] draft genome, Amel_4.0.	7e-13
SI.CL.9.cl.948.Contig1	chr|AMe_AADG05006114|AMe_AADG05006114.1	Linkage group 15; [Apis mellifera] draft genome, Amel_4.0.	8e-13
SI.CL.27.cl.2740.Contig1	chr|AMe_AADG05004820|AMe_AADG05004820.1	Linkage group 13; [Apis mellifera] draft genome, Amel_4.0.	1e-12
SI.CL.17.cl.1729.Contig1	chr|AMe_AADG05001521|AMe_AADG05001521.1	Linkage group 3; [Apis mellifera] draft genome, Amel_4.0.	2e-12
SI.CL.5.cl.561.SiJWC08ABC.scf	chr|AMe_AADG05011227|AMe_AADG05011227.1	Linkage group Un; [Apis mellifera] draft genome, Amel_4.0.	2e-12
SI.CL.13.cl.1380.SiJWE06BDM2.scf	chr|AMe_AADG05003521|AMe_AADG05003521.1	Linkage group 9; [Apis mellifera] draft genome, Amel_4.0.	3e-12
SiJWD09AAQ.scf	chr|AMe_AADG05006641|AMe_AADG05006641.1	Linkage group 15; [Apis mellifera] draft genome, Amel_4.0.	3e-12
SiJWF11ACS.scf	chr|AMe_AADG05002062|AMe_AADG05002062.1	Linkage group 5; [Apis mellifera] draft genome, Amel_4.0.	3e-12
SI.CL.3.cl.325.Contig1	chr|AMe_AADG05006248|AMe_AADG05006248.1	Linkage group 8; [Apis mellifera] draft genome, Amel_4.0.	3e-12
SiJWE10ABP2.scf	chr|AMe_AADG05002204|AMe_AADG05002204.1	Linkage group 5; [Apis mellifera] draft genome, Amel_4.0.	3e-12
SiJWD09ABP2.scf	chr|AMe_AADG05001810|AMe_AADG05001810.1	Linkage group 4; [Apis mellifera] draft genome, Amel_4.0.	3e-12
SiJWF11ACO.scf	chr|AMe_AADG05005730|AMe_AADG05005730.1	Linkage group 1; [Apis mellifera] draft genome, Amel_4.0.	3e-12
SI.CL.30.cl.3015.SiJWB01CAF2.scf	chr|AMe_AADG05001955|AMe_AADG05001955.1	Linkage group 5; [Apis mellifera] draft genome, Amel_4.0.	3e-12
SI.CL.5.cl.561.SiJWG02BDJ.scf	chr|AMe_AADG05011227|AMe_AADG05011227.1	Linkage group Un; [Apis mellifera] draft genome, Amel_4.0.	3e-12
SI.CL.29.cl.2964.Contig1	chr|AMe_AADG05002930|AMe_AADG05002930.1	Linkage group 7; [Apis mellifera] draft genome, Amel_4.0.	4e-12
SI.CL.25.cl.2567.Contig1	chr|AMe_AADG05006138|AMe_AADG05006138.1	Linkage group 7; [Apis mellifera] draft genome, Amel_4.0.	7e-12
SI.CL.3.cl.303.Contig1	chr|AMe_AADG05005649|AMe_AADG05005649.1	Linkage group 16; [Apis mellifera] draft genome, Amel_4.0.	8e-12
SI.CL.2.cl.251.Contig1	chr|AMe_AADG05003839|AMe_AADG05003839.1	Linkage group 10; [Apis mellifera] draft genome, Amel_4.0.	8e-12
SI.CL.29.cl.2908.Contig1	chr|AMe_AADG05007409|AMe_AADG05007409.1	Linkage group Un; [Apis mellifera] draft genome, Amel_4.0.	9e-12
SI.CL.22.cl.2269.Contig1	chr|AMe_AADG05001049|AMe_AADG05001049.1	Linkage group 2; [Apis mellifera] draft genome, Amel_4.0.	9e-12
SI.CL.33.cl.3377.Contig1	chr|AMe_AADG05005128|AMe_AADG05005128.1	Linkage group 14; [Apis mellifera] draft genome, Amel_4.0.	9e-12
SiJWB12ACF.scf	chr|AMe_AADG05006068|AMe_AADG05006068.1	Linkage group 15; [Apis mellifera] draft genome, Amel_4.0.	1e-11
SI.CL.22.cl.2269.SiJWE02ADX.scf	chr|AMe_AADG05001049|AMe_AADG05001049.1	Linkage group 2; [Apis mellifera] draft genome, Amel_4.0.	1e-11
SiJWC02BBU.scf	chr|AMe_AADG05009582|AMe_AADG05009582.1	Linkage group Un; [Apis mellifera] draft genome, Amel_4.0.	1e-11
SI.CL.9.cl.926.SiJWA11BCV.scf	chr|AMe_AADG05000441|AMe_AADG05000441.1	Linkage group 1; [Apis mellifera] draft genome, Amel_4.0.	1e-11
SiJWB09ABX.scf	chr|AMe_AADG05002357|AMe_AADG05002357.1	Linkage group 6; [Apis mellifera] draft genome, Amel_4.0.	1e-11
SiJWH07ACQ.scf	chr|AMe_AADG05002466|AMe_AADG05002466.1	Linkage group 6; [Apis mellifera] draft genome, Amel_4.0.	1e-11
SiJWF03CAJ2.scf	chr|AMe_AADG05004225|AMe_AADG05004225.1	Linkage group 11; [Apis mellifera] draft genome, Amel_4.0.	1e-11
SiJWH09AAE.tag5_H09_15.scf	chr|AMe_AADG05001018|AMe_AADG05001018.1	Linkage group 2; [Apis mellifera] draft genome, Amel_4.0.	1e-11
SI.CL.40.cl.4081.Contig1	chr|AMe_AADG05005010|AMe_AADG05005010.1	Linkage group 14; [Apis mellifera] draft genome, Amel_4.0.	1e-11
SiJWD09ABA.scf	chr|AMe_AADG05004675|AMe_AADG05004675.1	Linkage group 12; [Apis mellifera] draft genome, Amel_4.0.	1e-11
SiJWD09BCG2.scf	chr|AMe_AADG05002701|AMe_AADG05002701.1	Linkage group 7; [Apis mellifera] draft genome, Amel_4.0.	1e-11
SiJWE06ABM.scf	chr|AMe_AADG05005989|AMe_AADG05005989.1	Linkage group 6; [Apis mellifera] draft genome, Amel_4.0.	1e-11
SI.CL.7.cl.778.Contig3	chr|AMe_AADG05000838|AMe_AADG05000838.1	Linkage group 2; [Apis mellifera] draft genome, Amel_4.0.	2e-11
SI.CL.24.cl.2461.Contig1	chr|AMe_AADG05003521|AMe_AADG05003521.1	Linkage group 9; [Apis mellifera] draft genome, Amel_4.0.	3e-11
SI.CL.30.cl.3015.Contig1	chr|AMe_AADG05001955|AMe_AADG05001955.1	Linkage group 5; [Apis mellifera] draft genome, Amel_4.0.	3e-11
SI.CL.13.cl.1303.Contig1	chr|AMe_AADG05001380|AMe_AADG05001380.1	Linkage group 3; [Apis mellifera] draft genome, Amel_4.0.	3e-11
SiJWG03ADN.scf	chr|AMe_AADG05005305|AMe_AADG05005305.1	Linkage group 15; [Apis mellifera] draft genome, Amel_4.0.	4e-11
SiJWF03ADE.scf	chr|AMe_AADG05001423|AMe_AADG05001423.1	Linkage group 3; [Apis mellifera] draft genome, Amel_4.0.	4e-11
SiJWE09ABT.scf	chr|AMe_AADG05003807|AMe_AADG05003807.1	Linkage group 10; [Apis mellifera] draft genome, Amel_4.0.	4e-11
SiJWC07CAO2.scf	chr|AMe_AADG05007219|AMe_AADG05007219.1	Linkage group Un; [Apis mellifera] draft genome, Amel_4.0.	4e-11
SI.CL.15.cl.1553.Contig1	chr|AMe_AADG05002063|AMe_AADG05002063.1	Linkage group 5; [Apis mellifera] draft genome, Amel_4.0.	4e-11
SiJWD04BAJ.scf	chr|AMe_AADG05007891|AMe_AADG05007891.1	Linkage group Un; [Apis mellifera] draft genome, Amel_4.0.	4e-11
SiJWA06BBU.scf	chr|AMe_AADG05005628|AMe_AADG05005628.1	Linkage group 12; [Apis mellifera] draft genome, Amel_4.0.	4e-11
SI.CL.24.cl.2444.Contig1	chr|AMe_AADG05005715|AMe_AADG05005715.1	Linkage group 16; [Apis mellifera] draft genome, Amel_4.0.	5e-11
SiJWE07ADM.scf	chr|AMe_AADG05001426|AMe_AADG05001426.1	Linkage group 3; [Apis mellifera] draft genome, Amel_4.0.	5e-11
SI.CL.1.cl.172.Contig1	chr|AMe_AADG05004710|AMe_AADG05004710.1	Linkage group 12; [Apis mellifera] draft genome, Amel_4.0.	5e-11
SI.CL.43.cl.4302.SiJWC11AAC2.scf	chr|AMe_AADG05008784|AMe_AADG05008784.1	Linkage group Un; [Apis mellifera] draft genome, Amel_4.0.	5e-11
SI.CL.13.cl.1380.Contig1	chr|AMe_AADG05003521|AMe_AADG05003521.1	Linkage group 9; [Apis mellifera] draft genome, Amel_4.0.	5e-11
SiJWB03ADF.scf	chr|AMe_AADG05005883|AMe_AADG05005883.1	Linkage group 1; [Apis mellifera] draft genome, Amel_4.0.	5e-11
SI.CL.34.cl.3487.Contig1	chr|AMe_AADG05000470|AMe_AADG05000470.1	Linkage group 1; [Apis mellifera] draft genome, Amel_4.0.	5e-11
SiJWG08ADC.scf	chr|AMe_AADG05006904|AMe_AADG05006904.1	Linkage group 6; [Apis mellifera] draft genome, Amel_4.0.	5e-11
SI.CL.14.cl.1491.Contig1	chr|AMe_AADG05002430|AMe_AADG05002430.1	Linkage group 6; [Apis mellifera] draft genome, Amel_4.0.	6e-11
SI.CL.21.cl.2156.Contig1	chr|AMe_AADG05003997|AMe_AADG05003997.1	Linkage group 10; [Apis mellifera] draft genome, Amel_4.0.	6e-11
SI.CL.33.cl.3371.Contig1	chr|AMe_AADG05004372|AMe_AADG05004372.1	Linkage group 11; [Apis mellifera] draft genome, Amel_4.0.	9e-11
SI.CL.27.cl.2707.Contig1	chr|AMe_AADG05006385|AMe_AADG05006385.1	Linkage group 1; [Apis mellifera] draft genome, Amel_4.0.	1e-10
SI.CL.35.cl.3584.Contig1	chr|AMe_AADG05000657|AMe_AADG05000657.1	Linkage group 1; [Apis mellifera] draft genome, Amel_4.0.	1e-10
SI.CL.14.cl.1428.Contig1	chr|AMe_AADG05000293|AMe_AADG05000293.1	Linkage group 1; [Apis mellifera] draft genome, Amel_4.0.	1e-10
SI.CL.37.cl.3773.Contig1	chr|AMe_AADG05004719|AMe_AADG05004719.1	Linkage group 12; [Apis mellifera] draft genome, Amel_4.0.	1e-10
SiJWF04ABB.scf	chr|AMe_AADG05004518|AMe_AADG05004518.1	Linkage group 12; [Apis mellifera] draft genome, Amel_4.0.	1e-10
SiJWB04ADO.scf	chr|AMe_AADG05001252|AMe_AADG05001252.1	Linkage group 3; [Apis mellifera] draft genome, Amel_4.0.	1e-10
SI.CL.18.cl.1879.Contig1	chr|AMe_AADG05002860|AMe_AADG05002860.1	Linkage group 7; [Apis mellifera] draft genome, Amel_4.0.	1e-10
SI.CL.8.cl.817.Contig1	chr|AMe_AADG05001571|AMe_AADG05001571.1	Linkage group 4; [Apis mellifera] draft genome, Amel_4.0.	1e-10
SiJWE06CAI2.scf	chr|AMe_AADG05003733|AMe_AADG05003733.1	Linkage group 10; [Apis mellifera] draft genome, Amel_4.0.	2e-10
SiJWE07AAZ.scf	chr|AMe_AADG05004324|AMe_AADG05004324.1	Linkage group 11; [Apis mellifera] draft genome, Amel_4.0.	2e-10
SiJWB12BCQ.tag5_B12_04.scf	chr|AMe_AADG05002900|AMe_AADG05002900.1	Linkage group 7; [Apis mellifera] draft genome, Amel_4.0.	2e-10
SI.CL.22.cl.2273.Contig1	chr|AMe_AADG05010581|AMe_AADG05010581.1	Linkage group Un; [Apis mellifera] draft genome, Amel_4.0.	2e-10
SI.CL.1.cl.104.Contig1	chr|AMe_AADG05008259|AMe_AADG05008259.1	Linkage group Un; [Apis mellifera] draft genome, Amel_4.0.	2e-10
SiJWE03ACS.scf	chr|AMe_AADG05005060|AMe_AADG05005060.1	Linkage group 14; [Apis mellifera] draft genome, Amel_4.0.	2e-10
SiJWG06ADD.scf	chr|AMe_AADG05001806|AMe_AADG05001806.1	Linkage group 4; [Apis mellifera] draft genome, Amel_4.0.	2e-10
SI.CL.15.cl.1586.Contig1	chr|AMe_AADG05006830|AMe_AADG05006830.1	Linkage group 6; [Apis mellifera] draft genome, Amel_4.0.	2e-10
SI.CL.20.cl.2024.SiJWB08ACH.scf	chr|AMe_AADG05003211|AMe_AADG05003211.1	Linkage group 8; [Apis mellifera] draft genome, Amel_4.0.	2e-10
SiJWA03BDI2.scf	chr|AMe_AADG05000834|AMe_AADG05000834.1	Linkage group 2; [Apis mellifera] draft genome, Amel_4.0.	2e-10
SiJWF02ACB.scf	chr|AMe_AADG05010273|AMe_AADG05010273.1	Linkage group Un; [Apis mellifera] draft genome, Amel_4.0.	2e-10
SiJWC03BBP.scf	chr|AMe_AADG05002869|AMe_AADG05002869.1	Linkage group 7; [Apis mellifera] draft genome, Amel_4.0.	2e-10
SiJWE05BCR.scf	chr|AMe_AADG05004675|AMe_AADG05004675.1	Linkage group 12; [Apis mellifera] draft genome, Amel_4.0.	2e-10
SiJWF10AAE.tag5_F10_12.scf	chr|AMe_AADG05001801|AMe_AADG05001801.1	Linkage group 4; [Apis mellifera] draft genome, Amel_4.0.	2e-10
SiJWF07BCE.scf	chr|AMe_AADG05001085|AMe_AADG05001085.1	Linkage group 2; [Apis mellifera] draft genome, Amel_4.0.	2e-10
SI.CL.4.cl.450.Contig1	chr|AMe_AADG05003176|AMe_AADG05003176.1	Linkage group 8; [Apis mellifera] draft genome, Amel_4.0.	3e-10
SI.CL.18.cl.1839.Contig2	chr|AMe_AADG05007029|AMe_AADG05007029.1	Linkage group Un; [Apis mellifera] draft genome, Amel_4.0.	3e-10
SI.CL.36.cl.3684.Contig1	chr|AMe_AADG05002071|AMe_AADG05002071.1	Linkage group 5; [Apis mellifera] draft genome, Amel_4.0.	4e-10
SI.CL.31.cl.3131.Contig1	chr|AMe_AADG05004752|AMe_AADG05004752.1	Linkage group 13; [Apis mellifera] draft genome, Amel_4.0.	4e-10
SI.CL.41.cl.4177.Contig1	chr|AMe_AADG05000528|AMe_AADG05000528.1	Linkage group 1; [Apis mellifera] draft genome, Amel_4.0.	4e-10
SI.CL.34.cl.3465.Contig1	chr|AMe_AADG05004205|AMe_AADG05004205.1	Linkage group 11; [Apis mellifera] draft genome, Amel_4.0.	5e-10
SiJWH03BAF.scf	chr|AMe_AADG05007498|AMe_AADG05007498.1	Linkage group Un; [Apis mellifera] draft genome, Amel_4.0.	6e-10
SiJWH10ADN.scf	chr|AMe_AADG05003998|AMe_AADG05003998.1	Linkage group 10; [Apis mellifera] draft genome, Amel_4.0.	6e-10
SiJWG05ABS.scf	chr|AMe_AADG05001617|AMe_AADG05001617.1	Linkage group 4; [Apis mellifera] draft genome, Amel_4.0.	6e-10
SiJWC06ACK.scf	chr|AMe_AADG05001493|AMe_AADG05001493.1	Linkage group 3; [Apis mellifera] draft genome, Amel_4.0.	6e-10
SI.CL.17.cl.1765.Contig1	chr|AMe_AADG05004725|AMe_AADG05004725.1	Linkage group 12; [Apis mellifera] draft genome, Amel_4.0.	6e-10
SiJWD06ADQ.scf	chr|AMe_AADG05016717|AMe_AADG05016717.1	Linkage group Un; [Apis mellifera] draft genome, Amel_4.0.	6e-10
SiJWG01BCW2.scf	chr|AMe_AADG05000475|AMe_AADG05000475.1	Linkage group 1; [Apis mellifera] draft genome, Amel_4.0.	7e-10
SiJWD07ABI.scf	chr|AMe_AADG05003076|AMe_AADG05003076.1	Linkage group 8; [Apis mellifera] draft genome, Amel_4.0.	7e-10
SI.CL.31.cl.3131.SiJWE10BBY.scf	chr|AMe_AADG05004752|AMe_AADG05004752.1	Linkage group 13; [Apis mellifera] draft genome, Amel_4.0.	7e-10
SiJWA11CAJ2.scf	chr|AMe_AADG05001695|AMe_AADG05001695.1	Linkage group 4; [Apis mellifera] draft genome, Amel_4.0.	7e-10
SI.CL.18.cl.1839.SiJWB10CAU2.scf	chr|AMe_AADG05007029|AMe_AADG05007029.1	Linkage group Un; [Apis mellifera] draft genome, Amel_4.0.	7e-10
SiJWB12BBP.scf	chr|AMe_AADG05008330|AMe_AADG05008330.1	Linkage group 7; [Apis mellifera] draft genome, Amel_4.0.	7e-10
SiJWE05AAL.scf	chr|AMe_AADG05001039|AMe_AADG05001039.1	Linkage group 2; [Apis mellifera] draft genome, Amel_4.0.	7e-10
SiJWA01CAV.scf	chr|AMe_AADG05004248|AMe_AADG05004248.1	Linkage group 11; [Apis mellifera] draft genome, Amel_4.0.	8e-10
SI.CL.31.cl.3152.SiJWH11CAI2.scf	chr|AMe_AADG05001106|AMe_AADG05001106.1	Linkage group 2; [Apis mellifera] draft genome, Amel_4.0.	8e-10
SI.CL.0.cl.007.Contig1	chr|AMe_AADG05002929|AMe_AADG05002929.1	Linkage group 7; [Apis mellifera] draft genome, Amel_4.0.	1e-09
SI.CL.18.cl.1839.Contig1	chr|AMe_AADG05007029|AMe_AADG05007029.1	Linkage group Un; [Apis mellifera] draft genome, Amel_4.0.	1e-09
SI.CL.2.cl.268.Contig1	chr|AMe_AADG05004643|AMe_AADG05004643.1	Linkage group 12; [Apis mellifera] draft genome, Amel_4.0.	1e-09
SiJWB01ADX.scf	chr|AMe_AADG05000761|AMe_AADG05000761.1	Linkage group 1; [Apis mellifera] draft genome, Amel_4.0.	2e-09
SI.CL.37.cl.3748.Contig1	chr|AMe_AADG05001232|AMe_AADG05001232.1	Linkage group 3; [Apis mellifera] draft genome, Amel_4.0.	2e-09
SI.CL.22.cl.2263.SiJWC03ADX.scf	chr|AMe_AADG05002638|AMe_AADG05002638.1	Linkage group 6; [Apis mellifera] draft genome, Amel_4.0.	2e-09
SI.CL.33.cl.3359.Contig1	chr|AMe_AADG05001985|AMe_AADG05001985.1	Linkage group 5; [Apis mellifera] draft genome, Amel_4.0.	2e-09
SI.CL.8.cl.874.Contig1	chr|AMe_AADG05001679|AMe_AADG05001679.1	Linkage group 4; [Apis mellifera] draft genome, Amel_4.0.	2e-09
SI.CL.11.cl.1122.Contig1	chr|AMe_AADG05000971|AMe_AADG05000971.1	Linkage group 2; [Apis mellifera] draft genome, Amel_4.0.	2e-09
SiJWA10BAO.scf	chr|AMe_AADG05002860|AMe_AADG05002860.1	Linkage group 7; [Apis mellifera] draft genome, Amel_4.0.	2e-09
SiJWF11ABC.scf	chr|AMe_AADG05000923|AMe_AADG05000923.1	Linkage group 2; [Apis mellifera] draft genome, Amel_4.0.	2e-09
SiJWB01AAQ.scf	chr|AMe_AADG05003636|AMe_AADG05003636.1	Linkage group 9; [Apis mellifera] draft genome, Amel_4.0.	2e-09
SiJWG05BBK.scf	chr|AMe_AADG05000377|AMe_AADG05000377.1	Linkage group 1; [Apis mellifera] draft genome, Amel_4.0.	2e-09
SiJWA08BAB.scf	chr|AMe_AADG05001794|AMe_AADG05001794.1	Linkage group 4; [Apis mellifera] draft genome, Amel_4.0.	2e-09
SiJWG12ACW.scf	chr|AMe_AADG05000881|AMe_AADG05000881.1	Linkage group 2; [Apis mellifera] draft genome, Amel_4.0.	2e-09
SI.CL.14.cl.1461.Contig1	chr|AMe_AADG05012220|AMe_AADG05012220.1	Linkage group Un; [Apis mellifera] draft genome, Amel_4.0.	2e-09
SiJWC12ADW.scf	chr|AMe_AADG05001553|AMe_AADG05001553.1	Linkage group 4; [Apis mellifera] draft genome, Amel_4.0.	2e-09
SI.CL.12.cl.1211.Contig1	chr|AMe_AADG05001679|AMe_AADG05001679.1	Linkage group 4; [Apis mellifera] draft genome, Amel_4.0.	2e-09
SI.CL.26.cl.2658.Contig1	chr|AMe_AADG05005453|AMe_AADG05005453.1	Linkage group 15; [Apis mellifera] draft genome, Amel_4.0.	2e-09
SiJWA11ABG.scf	chr|AMe_AADG05012489|AMe_AADG05012489.1	Linkage group Un; [Apis mellifera] draft genome, Amel_4.0.	3e-09
SiJWE10BCK2.scf	chr|AMe_AADG05000549|AMe_AADG05000549.1	Linkage group 1; [Apis mellifera] draft genome, Amel_4.0.	3e-09
SiJWC12BBA.scf	chr|AMe_AADG05002060|AMe_AADG05002060.1	Linkage group 5; [Apis mellifera] draft genome, Amel_4.0.	3e-09
SiJWA05CAB.scf	chr|AMe_AADG05002338|AMe_AADG05002338.1	Linkage group 6; [Apis mellifera] draft genome, Amel_4.0.	3e-09
SiJWB09ACD.scf	chr|AMe_AADG05004245|AMe_AADG05004245.1	Linkage group 11; [Apis mellifera] draft genome, Amel_4.0.	3e-09
SiJWE09AAV.scf	chr|AMe_AADG05005022|AMe_AADG05005022.1	Linkage group 14; [Apis mellifera] draft genome, Amel_4.0.	3e-09
SiJWE03CAL2.scf	chr|AMe_AADG05003144|AMe_AADG05003144.1	Linkage group 8; [Apis mellifera] draft genome, Amel_4.0.	3e-09
SI.CL.5.cl.514.Contig1	chr|AMe_AADG05003588|AMe_AADG05003588.1	Linkage group 9; [Apis mellifera] draft genome, Amel_4.0.	3e-09
SiJWF04BCG2.scf	chr|AMe_AADG05003856|AMe_AADG05003856.1	Linkage group 10; [Apis mellifera] draft genome, Amel_4.0.	3e-09
SiJWB03ACG.scf	chr|AMe_AADG05002331|AMe_AADG05002331.1	Linkage group 6; [Apis mellifera] draft genome, Amel_4.0.	3e-09
SiJWC02BDV2.scf	chr|AMe_AADG05001696|AMe_AADG05001696.1	Linkage group 4; [Apis mellifera] draft genome, Amel_4.0.	3e-09
SI.CL.3.cl.332.Contig1	chr|AMe_AADG05004686|AMe_AADG05004686.1	Linkage group 12; [Apis mellifera] draft genome, Amel_4.0.	3e-09
SI.CL.27.cl.2729.Contig1	chr|AMe_AADG05000777|AMe_AADG05000777.1	Linkage group 2; [Apis mellifera] draft genome, Amel_4.0.	3e-09
SiJWF01BDY.scf	chr|AMe_AADG05006134|AMe_AADG05006134.1	Linkage group 7; [Apis mellifera] draft genome, Amel_4.0.	3e-09
SiJWB03ADD.scf	chr|AMe_AADG05005928|AMe_AADG05005928.1	Linkage group 6; [Apis mellifera] draft genome, Amel_4.0.	3e-09
SI.CL.14.cl.1461.SiJWF10BBJ2.scf	chr|AMe_AADG05012220|AMe_AADG05012220.1	Linkage group Un; [Apis mellifera] draft genome, Amel_4.0.	3e-09
SI.CL.34.cl.3449.Contig1	chr|AMe_AADG05014075|AMe_AADG05014075.1	Linkage group Un; [Apis mellifera] draft genome, Amel_4.0.	4e-09
SI.CL.32.cl.3210.Contig1	chr|AMe_AADG05001909|AMe_AADG05001909.1	Linkage group 5; [Apis mellifera] draft genome, Amel_4.0.	4e-09
SI.CL.26.cl.2667.Contig1	chr|AMe_AADG05004709|AMe_AADG05004709.1	Linkage group 12; [Apis mellifera] draft genome, Amel_4.0.	6e-09
SiJWH07ACA.scf	chr|AMe_AADG05006300|AMe_AADG05006300.1	Linkage group Un; [Apis mellifera] draft genome, Amel_4.0.	7e-09
SI.CL.35.cl.3516.Contig1	chr|AMe_AADG05017864|AMe_AADG05017864.1	Linkage group Un; [Apis mellifera] draft genome, Amel_4.0.	7e-09
SI.CL.31.cl.3139.Contig1	chr|AMe_AADG05001006|AMe_AADG05001006.1	Linkage group 2; [Apis mellifera] draft genome, Amel_4.0.	7e-09
SI.CL.42.cl.4238.Contig1	chr|AMe_AADG05001535|AMe_AADG05001535.1	Linkage group 3; [Apis mellifera] draft genome, Amel_4.0.	8e-09
SI.CL.42.cl.4281.Contig1	chr|AMe_AADG05005811|AMe_AADG05005811.1	Linkage group 1; [Apis mellifera] draft genome, Amel_4.0.	8e-09
SI.CL.28.cl.2858.Contig1	chr|AMe_AADG05003503|AMe_AADG05003503.1	Linkage group 9; [Apis mellifera] draft genome, Amel_4.0.	8e-09
SI.CL.21.cl.2108.Contig1	chr|AMe_AADG05003636|AMe_AADG05003636.1	Linkage group 9; [Apis mellifera] draft genome, Amel_4.0.	9e-09
SI.CL.32.cl.3219.Contig1	chr|AMe_AADG05002410|AMe_AADG05002410.1	Linkage group 6; [Apis mellifera] draft genome, Amel_4.0.	9e-09
SiJWA04ADB.scf	chr|AMe_AADG05008379|AMe_AADG05008379.1	Linkage group Un; [Apis mellifera] draft genome, Amel_4.0.	9e-09
SI.CL.8.cl.881.Contig1	chr|AMe_AADG05015937|AMe_AADG05015937.1	Linkage group Un; [Apis mellifera] draft genome, Amel_4.0.	9e-09
SiJWB03ACM.scf	chr|AMe_AADG05002268|AMe_AADG05002268.1	Linkage group 6; [Apis mellifera] draft genome, Amel_4.0.	1e-08
SI.CL.29.cl.2955.SiJWD08BAY2.scf	chr|AMe_AADG05002795|AMe_AADG05002795.1	Linkage group 7; [Apis mellifera] draft genome, Amel_4.0.	1e-08
SiJWB11ADK.scf	chr|AMe_AADG05007319|AMe_AADG05007319.1	Linkage group 10; [Apis mellifera] draft genome, Amel_4.0.	1e-08
SiJWF12AAQ.scf	chr|AMe_AADG05002202|AMe_AADG05002202.1	Linkage group 5; [Apis mellifera] draft genome, Amel_4.0.	1e-08
SI.CL.19.cl.1942.Contig1	chr|AMe_AADG05005470|AMe_AADG05005470.1	Linkage group 15; [Apis mellifera] draft genome, Amel_4.0.	1e-08
SI.CL.1.cl.142.Contig1	chr|AMe_AADG05001307|AMe_AADG05001307.1	Linkage group 3; [Apis mellifera] draft genome, Amel_4.0.	1e-08
SiJWD02BBX.scf	chr|AMe_AADG05001781|AMe_AADG05001781.1	Linkage group 4; [Apis mellifera] draft genome, Amel_4.0.	1e-08
SiJWE05CAK2.scf	chr|AMe_AADG05005691|AMe_AADG05005691.1	Linkage group 16; [Apis mellifera] draft genome, Amel_4.0.	1e-08
SiJWG09ACB.scf	chr|AMe_AADG05000622|AMe_AADG05000622.1	Linkage group 1; [Apis mellifera] draft genome, Amel_4.0.	1e-08
SiJWD10BDD2.scf	chr|AMe_AADG05017501|AMe_AADG05017501.1	Linkage group Un; [Apis mellifera] draft genome, Amel_4.0.	1e-08
SI.CL.41.cl.4198.SiJWB06BCU2.scf	chr|AMe_AADG05000108|AMe_AADG05000108.1	Linkage group 1; [Apis mellifera] draft genome, Amel_4.0.	1e-08
SiJWA12BBC2.scf	chr|AMe_AADG05004226|AMe_AADG05004226.1	Linkage group 11; [Apis mellifera] draft genome, Amel_4.0.	1e-08
SiJWG11ABU.scf	chr|AMe_AADG05006773|AMe_AADG05006773.1	Linkage group 1; [Apis mellifera] draft genome, Amel_4.0.	1e-08
SiJWC03BAP.scf	chr|AMe_AADG05002878|AMe_AADG05002878.1	Linkage group 7; [Apis mellifera] draft genome, Amel_4.0.	1e-08
SI.CL.41.cl.4198.SiJWD02BCLC.tag5_D05_07.scf	chr|AMe_AADG05000108|AMe_AADG05000108.1	Linkage group 1; [Apis mellifera] draft genome, Amel_4.0.	1e-08
SiJWG07ADQ.scf	chr|AMe_AADG05001988|AMe_AADG05001988.1	Linkage group 5; [Apis mellifera] draft genome, Amel_4.0.	1e-08
SiJWB10ADD.scf	chr|AMe_AADG05003548|AMe_AADG05003548.1	Linkage group 9; [Apis mellifera] draft genome, Amel_4.0.	1e-08
SiJWH01BDE2.scf	chr|AMe_AADG05013189|AMe_AADG05013189.1	Linkage group Un; [Apis mellifera] draft genome, Amel_4.0.	1e-08
SiJWB11ADR.scf	chr|AMe_AADG05017768|AMe_AADG05017768.1	Linkage group Un; [Apis mellifera] draft genome, Amel_4.0.	1e-08
SI.CL.24.cl.2447.SiJWD10BCU2.scf	chr|AMe_AADG05003843|AMe_AADG05003843.1	Linkage group 10; [Apis mellifera] draft genome, Amel_4.0.	1e-08
SiJWB11AA1_evro_B12_3prime.scf	chr|AMe_AADG05003532|AMe_AADG05003532.1	Linkage group 9; [Apis mellifera] draft genome, Amel_4.0.	2e-08
SiJWB04BBE.scf	chr|AMe_AADG05004520|AMe_AADG05004520.1	Linkage group 12; [Apis mellifera] draft genome, Amel_4.0.	3e-08
SI.CL.26.cl.2669.Contig1	chr|AMe_AADG05000312|AMe_AADG05000312.1	Linkage group 1; [Apis mellifera] draft genome, Amel_4.0.	3e-08
SiJWF07BAK.scf	chr|AMe_AADG05002101|AMe_AADG05002101.1	Linkage group 5; [Apis mellifera] draft genome, Amel_4.0.	4e-08
SiJWC04ADY.scf	chr|AMe_AADG05005628|AMe_AADG05005628.1	Linkage group 12; [Apis mellifera] draft genome, Amel_4.0.	4e-08
SiJWA10BBX.scf	chr|AMe_AADG05016447|AMe_AADG05016447.1	Linkage group Un; [Apis mellifera] draft genome, Amel_4.0.	4e-08
SiJWC05ACN.scf	chr|AMe_AADG05004925|AMe_AADG05004925.1	Linkage group 13; [Apis mellifera] draft genome, Amel_4.0.	4e-08
SiJWB04ACG.scf	chr|AMe_AADG05004758|AMe_AADG05004758.1	Linkage group 13; [Apis mellifera] draft genome, Amel_4.0.	4e-08
SI.CL.24.cl.2470.SiJWB03ADZ.scf	chr|AMe_AADG05005015|AMe_AADG05005015.1	Linkage group 14; [Apis mellifera] draft genome, Amel_4.0.	4e-08
SiJWF11BDM2.scf	chr|AMe_AADG05003646|AMe_AADG05003646.1	Linkage group 9; [Apis mellifera] draft genome, Amel_4.0.	4e-08
SiJWH03BAS.scf	chr|AMe_AADG05002468|AMe_AADG05002468.1	Linkage group 6; [Apis mellifera] draft genome, Amel_4.0.	4e-08
SiJWH09BBL.scf	chr|AMe_AADG05017252|AMe_AADG05017252.1	Linkage group Un; [Apis mellifera] draft genome, Amel_4.0.	4e-08
SiJWA07BAR.scf	chr|AMe_AADG05015642|AMe_AADG05015642.1	Linkage group Un; [Apis mellifera] draft genome, Amel_4.0.	4e-08
SiJWF01ACT.scf	chr|AMe_AADG05006846|AMe_AADG05006846.1	Linkage group Un; [Apis mellifera] draft genome, Amel_4.0.	4e-08
SiJWB02AAX.scf	chr|AMe_AADG05000595|AMe_AADG05000595.1	Linkage group 1; [Apis mellifera] draft genome, Amel_4.0.	4e-08
SiJWG03BBS.scf	chr|AMe_AADG05003842|AMe_AADG05003842.1	Linkage group 10; [Apis mellifera] draft genome, Amel_4.0.	4e-08
SI.CL.24.cl.2470.SiJWF03CAU2.scf	chr|AMe_AADG05005015|AMe_AADG05005015.1	Linkage group 14; [Apis mellifera] draft genome, Amel_4.0.	5e-08
SiJWB01BAZ2.scf	chr|AMe_AADG05000011|AMe_AADG05000011.1	Linkage group 1; [Apis mellifera] draft genome, Amel_4.0.	5e-08
SiJWE02CAU2.scf	chr|AMe_AADG05002930|AMe_AADG05002930.1	Linkage group 7; [Apis mellifera] draft genome, Amel_4.0.	5e-08
SI.CL.42.cl.4246.SiJWH11BAA2.scf	chr|AMe_AADG05017250|AMe_AADG05017250.1	Linkage group Un; [Apis mellifera] draft genome, Amel_4.0.	5e-08
SiJWC03AAO.scf	chr|AMe_AADG05003532|AMe_AADG05003532.1	Linkage group 9; [Apis mellifera] draft genome, Amel_4.0.	5e-08
SiJWH10CAU2.scf	chr|AMe_AADG05006982|AMe_AADG05006982.1	Linkage group Un; [Apis mellifera] draft genome, Amel_4.0.	5e-08
SI.CL.9.cl.987.Contig1	chr|AMe_AADG05003297|AMe_AADG05003297.1	Linkage group 8; [Apis mellifera] draft genome, Amel_4.0.	5e-08
SI.CL.32.cl.3295.Contig1	chr|AMe_AADG05004748|AMe_AADG05004748.1	Linkage group 13; [Apis mellifera] draft genome, Amel_4.0.	6e-08
SI.CL.38.cl.3898.Contig1	chr|AMe_AADG05010317|AMe_AADG05010317.1	Linkage group Un; [Apis mellifera] draft genome, Amel_4.0.	6e-08
SI.CL.35.cl.3504.Contig1	chr|AMe_AADG05002515|AMe_AADG05002515.1	Linkage group 6; [Apis mellifera] draft genome, Amel_4.0.	9e-08
SI.CL.3.cl.384.Contig1	chr|AMe_AADG05009563|AMe_AADG05009563.1	Linkage group Un; [Apis mellifera] draft genome, Amel_4.0.	9e-08
SI.CL.36.cl.3652.Contig1	chr|AMe_AADG05000592|AMe_AADG05000592.1	Linkage group 1; [Apis mellifera] draft genome, Amel_4.0.	1e-07
SiJWA11ACL.scf	chr|AMe_AADG05006280|AMe_AADG05006280.1	Linkage group 14; [Apis mellifera] draft genome, Amel_4.0.	1e-07
SiJWA06AEA.scf	chr|AMe_AADG05004763|AMe_AADG05004763.1	Linkage group 13; [Apis mellifera] draft genome, Amel_4.0.	1e-07
SI.CL.21.cl.2168.Contig1	chr|AMe_AADG05004763|AMe_AADG05004763.1	Linkage group 13; [Apis mellifera] draft genome, Amel_4.0.	1e-07
SI.CL.13.cl.1391.Contig1	chr|AMe_AADG05006002|AMe_AADG05006002.1	Linkage group 4; [Apis mellifera] draft genome, Amel_4.0.	1e-07
SiJWD06ADV.scf	chr|AMe_AADG05002322|AMe_AADG05002322.1	Linkage group 6; [Apis mellifera] draft genome, Amel_4.0.	1e-07
SI.CL.21.cl.2127.Contig1	chr|AMe_AADG05003907|AMe_AADG05003907.1	Linkage group 10; [Apis mellifera] draft genome, Amel_4.0.	1e-07
SI.CL.37.cl.3768.Contig1	chr|AMe_AADG05008836|AMe_AADG05008836.1	Linkage group Un; [Apis mellifera] draft genome, Amel_4.0.	1e-07
SI.CL.1.cl.119.Contig1	chr|AMe_AADG05004721|AMe_AADG05004721.1	Linkage group 12; [Apis mellifera] draft genome, Amel_4.0.	1e-07
SI.CL.7.cl.720.Contig1	chr|AMe_AADG05001302|AMe_AADG05001302.1	Linkage group 3; [Apis mellifera] draft genome, Amel_4.0.	1e-07
SI.CL.1.cl.164.Contig1	chr|AMe_AADG05005974|AMe_AADG05005974.1	Linkage group 16; [Apis mellifera] draft genome, Amel_4.0.	1e-07
SI.CL.9.cl.950.Contig1	chr|AMe_AADG05004742|AMe_AADG05004742.1	Linkage group 13; [Apis mellifera] draft genome, Amel_4.0.	1e-07
SI.CL.35.cl.3579.Contig1	chr|AMe_AADG05004320|AMe_AADG05004320.1	Linkage group 11; [Apis mellifera] draft genome, Amel_4.0.	1e-07
SiJWC10BBB.scf	chr|AMe_AADG05003233|AMe_AADG05003233.1	Linkage group 8; [Apis mellifera] draft genome, Amel_4.0.	1e-07
SI.CL.41.cl.4115.Contig1	chr|AMe_AADG05004654|AMe_AADG05004654.1	Linkage group 12; [Apis mellifera] draft genome, Amel_4.0.	1e-07
SiJWE07BBB.scf	chr|AMe_AADG05001366|AMe_AADG05001366.1	Linkage group 3; [Apis mellifera] draft genome, Amel_4.0.	2e-07
SiJWD03ABU.scf	chr|AMe_AADG05005460|AMe_AADG05005460.1	Linkage group 15; [Apis mellifera] draft genome, Amel_4.0.	2e-07
SiJWH08BBZ.scf	chr|AMe_AADG05004809|AMe_AADG05004809.1	Linkage group 13; [Apis mellifera] draft genome, Amel_4.0.	2e-07
SI.CL.41.cl.4104.Contig1	chr|AMe_AADG05004777|AMe_AADG05004777.1	Linkage group 13; [Apis mellifera] draft genome, Amel_4.0.	2e-07
SiJWG01ACW.scf	chr|AMe_AADG05005003|AMe_AADG05005003.1	Linkage group 14; [Apis mellifera] draft genome, Amel_4.0.	2e-07
SiJWD08BCC.tag5_D08_08.scf	chr|AMe_AADG05001120|AMe_AADG05001120.1	Linkage group 2; [Apis mellifera] draft genome, Amel_4.0.	2e-07
SiJWB09AAQ.scf	chr|AMe_AADG05006671|AMe_AADG05006671.1	Linkage group Un; [Apis mellifera] draft genome, Amel_4.0.	2e-07
SI.CL.32.cl.3203.Contig1	chr|AMe_AADG05002962|AMe_AADG05002962.1	Linkage group 7; [Apis mellifera] draft genome, Amel_4.0.	2e-07
SiJWA02BAJ.scf	chr|AMe_AADG05005027|AMe_AADG05005027.1	Linkage group 14; [Apis mellifera] draft genome, Amel_4.0.	2e-07
SiJWD04BDI2.scf	chr|AMe_AADG05000207|AMe_AADG05000207.1	Linkage group 1; [Apis mellifera] draft genome, Amel_4.0.	2e-07
SiJWH05ADK.scf	chr|AMe_AADG05007293|AMe_AADG05007293.1	Linkage group Un; [Apis mellifera] draft genome, Amel_4.0.	2e-07
SiJWB05BCZ2.scf	chr|AMe_AADG05001074|AMe_AADG05001074.1	Linkage group 2; [Apis mellifera] draft genome, Amel_4.0.	2e-07
SI.CL.30.cl.3006.Contig1	chr|AMe_AADG05005878|AMe_AADG05005878.1	Linkage group 6; [Apis mellifera] draft genome, Amel_4.0.	2e-07
SI.CL.37.cl.3708.Contig1	chr|AMe_AADG05001614|AMe_AADG05001614.1	Linkage group 4; [Apis mellifera] draft genome, Amel_4.0.	2e-07
SiJWG05CAW.scf	chr|AMe_AADG05009269|AMe_AADG05009269.1	Linkage group Un; [Apis mellifera] draft genome, Amel_4.0.	2e-07
SiJWB09BCV.scf	chr|AMe_AADG05002693|AMe_AADG05002693.1	Linkage group 7; [Apis mellifera] draft genome, Amel_4.0.	2e-07
SI.CL.4.cl.461.Contig1	chr|AMe_AADG05007330|AMe_AADG05007330.1	Linkage group 15; [Apis mellifera] draft genome, Amel_4.0.	2e-07
SiJWB12BDB2.scf	chr|AMe_AADG05002395|AMe_AADG05002395.1	Linkage group 6; [Apis mellifera] draft genome, Amel_4.0.	2e-07
SiJWG05ADF.scf	chr|AMe_AADG05005486|AMe_AADG05005486.1	Linkage group 15; [Apis mellifera] draft genome, Amel_4.0.	2e-07
SiJWE08ACT.scf	chr|AMe_AADG05006817|AMe_AADG05006817.1	Linkage group 8; [Apis mellifera] draft genome, Amel_4.0.	2e-07
SiJWE11AAE.tag5_E11_09.scf	chr|AMe_AADG05005052|AMe_AADG05005052.1	Linkage group 14; [Apis mellifera] draft genome, Amel_4.0.	2e-07
SI.CL.22.cl.2204.Contig1	chr|AMe_AADG05003749|AMe_AADG05003749.1	Linkage group 10; [Apis mellifera] draft genome, Amel_4.0.	3e-07
SI.CL.7.cl.756.Contig2	chr|AMe_AADG05000377|AMe_AADG05000377.1	Linkage group 1; [Apis mellifera] draft genome, Amel_4.0.	4e-07
SiJWF03ABD.scf	chr|AMe_AADG05007952|AMe_AADG05007952.1	Linkage group 7; [Apis mellifera] draft genome, Amel_4.0.	5e-07
SiJWF08ACC.scf	chr|AMe_AADG05006526|AMe_AADG05006526.1	Linkage group Un; [Apis mellifera] draft genome, Amel_4.0.	5e-07
SiJWF01ABM.scf	chr|AMe_AADG05005910|AMe_AADG05005910.1	Linkage group 13; [Apis mellifera] draft genome, Amel_4.0.	6e-07
SiJWE05BBZ.scf	chr|AMe_AADG05000680|AMe_AADG05000680.1	Linkage group 1; [Apis mellifera] draft genome, Amel_4.0.	6e-07
SI.CL.13.cl.1335.Contig1	chr|AMe_AADG05010587|AMe_AADG05010587.1	Linkage group Un; [Apis mellifera] draft genome, Amel_4.0.	6e-07
SiJWD07BAH.scf	chr|AMe_AADG05001085|AMe_AADG05001085.1	Linkage group 2; [Apis mellifera] draft genome, Amel_4.0.	6e-07
SiJWD08ADY.scf	chr|AMe_AADG05004453|AMe_AADG05004453.1	Linkage group 11; [Apis mellifera] draft genome, Amel_4.0.	6e-07
SiJWC06ACB.scf	chr|AMe_AADG05015366|AMe_AADG05015366.1	Linkage group Un; [Apis mellifera] draft genome, Amel_4.0.	6e-07
SiJWA12ADZ.scf	chr|AMe_AADG05001840|AMe_AADG05001840.1	Linkage group 5; [Apis mellifera] draft genome, Amel_4.0.	6e-07
SiJWF07BAN.scf	chr|AMe_AADG05000484|AMe_AADG05000484.1	Linkage group 1; [Apis mellifera] draft genome, Amel_4.0.	6e-07
SI.CL.5.cl.513.Contig1	chr|AMe_AADG05003222|AMe_AADG05003222.1	Linkage group 8; [Apis mellifera] draft genome, Amel_4.0.	6e-07
SiJWG01AAU.scf	chr|AMe_AADG05003600|AMe_AADG05003600.1	Linkage group 9; [Apis mellifera] draft genome, Amel_4.0.	6e-07
SiJWA11ABT.scf	chr|AMe_AADG05001085|AMe_AADG05001085.1	Linkage group 2; [Apis mellifera] draft genome, Amel_4.0.	6e-07
SI.CL.2.cl.268.SiJWE08ACZ.scf	chr|AMe_AADG05004644|AMe_AADG05004644.1	Linkage group 12; [Apis mellifera] draft genome, Amel_4.0.	6e-07
SI.CL.20.cl.2006.Contig1	chr|AMe_AADG05006665|AMe_AADG05006665.1	Linkage group 11; [Apis mellifera] draft genome, Amel_4.0.	6e-07
SiJWC03ABU.scf	chr|AMe_AADG05002316|AMe_AADG05002316.1	Linkage group 6; [Apis mellifera] draft genome, Amel_4.0.	6e-07
SI.CL.5.cl.544.SiJWF10AAU.scf	chr|AMe_AADG05006193|AMe_AADG05006193.1	Linkage group 3; [Apis mellifera] draft genome, Amel_4.0.	6e-07
SiJWD06ACF.scf	chr|AMe_AADG05002200|AMe_AADG05002200.1	Linkage group 5; [Apis mellifera] draft genome, Amel_4.0.	6e-07
SI.CL.39.cl.3955.Contig1	chr|AMe_AADG05002480|AMe_AADG05002480.1	Linkage group 6; [Apis mellifera] draft genome, Amel_4.0.	6e-07
SiJWG07BDO2.scf	chr|AMe_AADG05005088|AMe_AADG05005088.1	Linkage group 14; [Apis mellifera] draft genome, Amel_4.0.	6e-07
SI.CL.0.cl.085.SiJWH05BCS2.scf	chr|AMe_AADG05000483|AMe_AADG05000483.1	Linkage group 1; [Apis mellifera] draft genome, Amel_4.0.	6e-07
SiJWA10ADY.scf	chr|AMe_AADG05000436|AMe_AADG05000436.1	Linkage group 1; [Apis mellifera] draft genome, Amel_4.0.	6e-07
SiJWD01AAP.scf	chr|AMe_AADG05003654|AMe_AADG05003654.1	Linkage group 9; [Apis mellifera] draft genome, Amel_4.0.	6e-07
SiJWF07BCC.tag5_F07_11.scf	chr|AMe_AADG05001422|AMe_AADG05001422.1	Linkage group 3; [Apis mellifera] draft genome, Amel_4.0.	7e-07
SiJWD02ADC.scf	chr|AMe_AADG05018057|AMe_AADG05018057.1	Linkage group Un; [Apis mellifera] draft genome, Amel_4.0.	7e-07
SiJWC06BDM2.scf	chr|AMe_AADG05006629|AMe_AADG05006629.1	Linkage group Un; [Apis mellifera] draft genome, Amel_4.0.	7e-07
SI.CL.13.cl.1380.SiJWG04BBM2.scf	chr|AMe_AADG05003521|AMe_AADG05003521.1	Linkage group 9; [Apis mellifera] draft genome, Amel_4.0.	7e-07
SI.CL.12.cl.1255.Contig1	chr|AMe_AADG05006560|AMe_AADG05006560.1	Linkage group Un; [Apis mellifera] draft genome, Amel_4.0.	7e-07
SI.CL.1.cl.174.Contig1	chr|AMe_AADG05000681|AMe_AADG05000681.1	Linkage group 1; [Apis mellifera] draft genome, Amel_4.0.	7e-07
SiJWB01BBV2.scf	chr|AMe_AADG05000602|AMe_AADG05000602.1	Linkage group 1; [Apis mellifera] draft genome, Amel_4.0.	7e-07
SiJWB09CAV.scf	chr|AMe_AADG05004727|AMe_AADG05004727.1	Linkage group 12; [Apis mellifera] draft genome, Amel_4.0.	7e-07
SI.CL.19.cl.1967.Contig1	chr|AMe_AADG05005354|AMe_AADG05005354.1	Linkage group 15; [Apis mellifera] draft genome, Amel_4.0.	8e-07
SI.CL.0.cl.085.Contig1	chr|AMe_AADG05000483|AMe_AADG05000483.1	Linkage group 1; [Apis mellifera] draft genome, Amel_4.0.	8e-07
SiJWC11AAF2.scf	chr|AMe_AADG05003205|AMe_AADG05003205.1	Linkage group 8; [Apis mellifera] draft genome, Amel_4.0.	8e-07
SI.CL.42.cl.4222.Contig1	chr|AMe_AADG05004710|AMe_AADG05004710.1	Linkage group 12; [Apis mellifera] draft genome, Amel_4.0.	8e-07
SI.CL.41.cl.4150.Contig1	chr|AMe_AADG05003761|AMe_AADG05003761.1	Linkage group 10; [Apis mellifera] draft genome, Amel_4.0.	9e-07
SI.CL.41.cl.4168.Contig1	chr|AMe_AADG05007951|AMe_AADG05007951.1	Linkage group 7; [Apis mellifera] draft genome, Amel_4.0.	1e-06
SI.CL.37.cl.3700.Contig1	chr|AMe_AADG05001575|AMe_AADG05001575.1	Linkage group 4; [Apis mellifera] draft genome, Amel_4.0.	1e-06
SI.CL.13.cl.1332.Contig1	chr|AMe_AADG05000638|AMe_AADG05000638.1	Linkage group 1; [Apis mellifera] draft genome, Amel_4.0.	1e-06
SI.CL.29.cl.2936.Contig1	chr|AMe_AADG05003965|AMe_AADG05003965.1	Linkage group 10; [Apis mellifera] draft genome, Amel_4.0.	2e-06
SI.CL.34.cl.3421.Contig1	chr|AMe_AADG05005401|AMe_AADG05005401.1	Linkage group 15; [Apis mellifera] draft genome, Amel_4.0.	2e-06
SI.CL.1.cl.173.Contig2	chr|AMe_AADG05006082|AMe_AADG05006082.1	Linkage group 11; [Apis mellifera] draft genome, Amel_4.0.	2e-06
SI.CL.4.cl.424.Contig1	chr|AMe_AADG05009185|AMe_AADG05009185.1	Linkage group Un; [Apis mellifera] draft genome, Amel_4.0.	2e-06
SiJWB03ABU.scf	chr|AMe_AADG05004638|AMe_AADG05004638.1	Linkage group 12; [Apis mellifera] draft genome, Amel_4.0.	2e-06
SiJWA08BBX.scf	chr|AMe_AADG05010840|AMe_AADG05010840.1	Linkage group Un; [Apis mellifera] draft genome, Amel_4.0.	2e-06
SiJWF08ADL.scf	chr|AMe_AADG05005928|AMe_AADG05005928.1	Linkage group 6; [Apis mellifera] draft genome, Amel_4.0.	2e-06
SI.CL.11.cl.1141.Contig1	chr|AMe_AADG05003343|AMe_AADG05003343.1	Linkage group 8; [Apis mellifera] draft genome, Amel_4.0.	2e-06
SiJWF11ABH.scf	chr|AMe_AADG05015071|AMe_AADG05015071.1	Linkage group Un; [Apis mellifera] draft genome, Amel_4.0.	2e-06
SiJWA05AAH.scf	chr|AMe_AADG05005199|AMe_AADG05005199.1	Linkage group 14; [Apis mellifera] draft genome, Amel_4.0.	2e-06
SiJWB07BAR.scf	chr|AMe_AADG05005470|AMe_AADG05005470.1	Linkage group 15; [Apis mellifera] draft genome, Amel_4.0.	2e-06
SiJWD12AAD.scf	chr|AMe_AADG05001252|AMe_AADG05001252.1	Linkage group 3; [Apis mellifera] draft genome, Amel_4.0.	2e-06
SiJWE05BBG.scf	chr|AMe_AADG05000106|AMe_AADG05000106.1	Linkage group 1; [Apis mellifera] draft genome, Amel_4.0.	2e-06
SiJWC04AAS.scf	chr|AMe_AADG05001298|AMe_AADG05001298.1	Linkage group 3; [Apis mellifera] draft genome, Amel_4.0.	2e-06
SiJWC06AEA.scf	chr|AMe_AADG05002900|AMe_AADG05002900.1	Linkage group 7; [Apis mellifera] draft genome, Amel_4.0.	2e-06
SiJWA12AAW.scf	chr|AMe_AADG05007740|AMe_AADG05007740.1	Linkage group 1; [Apis mellifera] draft genome, Amel_4.0.	2e-06
SiJWC11ACA.scf	chr|AMe_AADG05000008|AMe_AADG05000008.1	Linkage group 1; [Apis mellifera] draft genome, Amel_4.0.	2e-06
SI.CL.41.cl.4158.Contig1	chr|AMe_AADG05001469|AMe_AADG05001469.1	Linkage group 3; [Apis mellifera] draft genome, Amel_4.0.	2e-06
SiJWB08BAG.scf	chr|AMe_AADG05006080|AMe_AADG05006080.1	Linkage group 11; [Apis mellifera] draft genome, Amel_4.0.	2e-06
SI.CL.32.cl.3297.Contig1	chr|AMe_AADG05000021|AMe_AADG05000021.1	Linkage group 1; [Apis mellifera] draft genome, Amel_4.0.	2e-06
SiJWB04ADB.scf	chr|AMe_AADG05007768|AMe_AADG05007768.1	Linkage group Un; [Apis mellifera] draft genome, Amel_4.0.	2e-06
SiJWA10AAQ.scf	chr|AMe_AADG05000832|AMe_AADG05000832.1	Linkage group 2; [Apis mellifera] draft genome, Amel_4.0.	2e-06
SiJWB07ADV.scf	chr|AMe_AADG05003035|AMe_AADG05003035.1	Linkage group 8; [Apis mellifera] draft genome, Amel_4.0.	2e-06
SiJWB04ABN.scf	chr|AMe_AADG05002981|AMe_AADG05002981.1	Linkage group 7; [Apis mellifera] draft genome, Amel_4.0.	2e-06
SI.CL.29.cl.2950.Contig1	chr|AMe_AADG05003668|AMe_AADG05003668.1	Linkage group 9; [Apis mellifera] draft genome, Amel_4.0.	2e-06
SI.CL.5.cl.568.Contig1	chr|AMe_AADG05004196|AMe_AADG05004196.1	Linkage group 11; [Apis mellifera] draft genome, Amel_4.0.	2e-06
SiJWF11BBH.scf	chr|AMe_AADG05004919|AMe_AADG05004919.1	Linkage group 13; [Apis mellifera] draft genome, Amel_4.0.	2e-06
SI.CL.39.cl.3944.Contig1	chr|AMe_AADG05007028|AMe_AADG05007028.1	Linkage group 1; [Apis mellifera] draft genome, Amel_4.0.	2e-06
SI.CL.32.cl.3238.Contig1	chr|AMe_AADG05003899|AMe_AADG05003899.1	Linkage group 10; [Apis mellifera] draft genome, Amel_4.0.	2e-06
SiJWB11ACG.scf	chr|AMe_AADG05000955|AMe_AADG05000955.1	Linkage group 2; [Apis mellifera] draft genome, Amel_4.0.	2e-06
SI.CL.19.cl.1978.Contig1	chr|AMe_AADG05006069|AMe_AADG05006069.1	Linkage group 15; [Apis mellifera] draft genome, Amel_4.0.	3e-06
SI.CL.4.cl.424.Contig2	chr|AMe_AADG05009185|AMe_AADG05009185.1	Linkage group Un; [Apis mellifera] draft genome, Amel_4.0.	3e-06
SiJWB02CAR2.scf	chr|AMe_AADG05004380|AMe_AADG05004380.1	Linkage group 11; [Apis mellifera] draft genome, Amel_4.0.	3e-06
SiJWA01BBP.scf	chr|AMe_AADG05006126|AMe_AADG05006126.1	Linkage group 14; [Apis mellifera] draft genome, Amel_4.0.	3e-06
SiJWC06BBY.scf	chr|AMe_AADG05007408|AMe_AADG05007408.1	Linkage group Un; [Apis mellifera] draft genome, Amel_4.0.	3e-06
SiJWB01CAK2.scf	chr|AMe_AADG05002375|AMe_AADG05002375.1	Linkage group 6; [Apis mellifera] draft genome, Amel_4.0.	3e-06
SiJWC04CAD.scf	chr|AMe_AADG05008776|AMe_AADG05008776.1	Linkage group 3; [Apis mellifera] draft genome, Amel_4.0.	3e-06
SI.CL.28.cl.2806.Contig1	chr|AMe_AADG05004466|AMe_AADG05004466.1	Linkage group 12; [Apis mellifera] draft genome, Amel_4.0.	3e-06
SiJWH04BBW.scf	chr|AMe_AADG05005052|AMe_AADG05005052.1	Linkage group 14; [Apis mellifera] draft genome, Amel_4.0.	3e-06
SiJWG07ADG.scf	chr|AMe_AADG05008670|AMe_AADG05008670.1	Linkage group Un; [Apis mellifera] draft genome, Amel_4.0.	3e-06
SiJWG11BCV.scf	chr|AMe_AADG05004821|AMe_AADG05004821.1	Linkage group 13; [Apis mellifera] draft genome, Amel_4.0.	3e-06
SiJWE08CAB.scf	chr|AMe_AADG05011388|AMe_AADG05011388.1	Linkage group Un; [Apis mellifera] draft genome, Amel_4.0.	3e-06
SI.CL.17.cl.1758.SiJWE06CAE.scf	chr|AMe_AADG05006665|AMe_AADG05006665.1	Linkage group 11; [Apis mellifera] draft genome, Amel_4.0.	3e-06
SI.CL.24.cl.2428.Contig1	chr|AMe_AADG05005159|AMe_AADG05005159.1	Linkage group 14; [Apis mellifera] draft genome, Amel_4.0.	3e-06
SI.CL.7.cl.785.Contig1	chr|AMe_AADG05007616|AMe_AADG05007616.1	Linkage group Un; [Apis mellifera] draft genome, Amel_4.0.	3e-06
SI.CL.10.cl.1034.Contig1	chr|AMe_AADG05003967|AMe_AADG05003967.1	Linkage group 10; [Apis mellifera] draft genome, Amel_4.0.	3e-06
SiJWA10BAZ2.scf	chr|AMe_AADG05010295|AMe_AADG05010295.1	Linkage group Un; [Apis mellifera] draft genome, Amel_4.0.	3e-06
SiJWC05AAF2.scf	chr|AMe_AADG05000273|AMe_AADG05000273.1	Linkage group 1; [Apis mellifera] draft genome, Amel_4.0.	3e-06
SI.CL.34.cl.3400.Contig1	chr|AMe_AADG05005873|AMe_AADG05005873.1	Linkage group 6; [Apis mellifera] draft genome, Amel_4.0.	3e-06
SI.CL.10.cl.1034.SiJWD02BDI2.scf	chr|AMe_AADG05003967|AMe_AADG05003967.1	Linkage group 10; [Apis mellifera] draft genome, Amel_4.0.	3e-06
SiJWA09BCW2.scf	chr|AMe_AADG05006814|AMe_AADG05006814.1	Linkage group Un; [Apis mellifera] draft genome, Amel_4.0.	3e-06
SiJWF10BBM2.scf	chr|AMe_AADG05014651|AMe_AADG05014651.1	Linkage group Un; [Apis mellifera] draft genome, Amel_4.0.	3e-06
SiJWF10BCH2.scf	chr|AMe_AADG05001046|AMe_AADG05001046.1	Linkage group 2; [Apis mellifera] draft genome, Amel_4.0.	3e-06
SiJWG12BBT.scf	chr|AMe_AADG05003736|AMe_AADG05003736.1	Linkage group 10; [Apis mellifera] draft genome, Amel_4.0.	3e-06
SI.CL.17.cl.1758.Contig1	chr|AMe_AADG05006665|AMe_AADG05006665.1	Linkage group 11; [Apis mellifera] draft genome, Amel_4.0.	4e-06
SI.CL.28.cl.2843.Contig1	chr|AMe_AADG05008313|AMe_AADG05008313.1	Linkage group Un; [Apis mellifera] draft genome, Amel_4.0.	4e-06
SI.CL.13.cl.1374.Contig1	chr|AMe_AADG05002248|AMe_AADG05002248.1	Linkage group 6; [Apis mellifera] draft genome, Amel_4.0.	4e-06
SI.CL.28.cl.2806.Contig2	chr|AMe_AADG05004466|AMe_AADG05004466.1	Linkage group 12; [Apis mellifera] draft genome, Amel_4.0.	4e-06
SI.CL.31.cl.3159.Contig1	chr|AMe_AADG05003955|AMe_AADG05003955.1	Linkage group 10; [Apis mellifera] draft genome, Amel_4.0.	5e-06
SI.CL.24.cl.2462.Contig1	chr|AMe_AADG05005447|AMe_AADG05005447.1	Linkage group 15; [Apis mellifera] draft genome, Amel_4.0.	5e-06
SI.CL.4.cl.401.Contig1	chr|AMe_AADG05001675|AMe_AADG05001675.1	Linkage group 4; [Apis mellifera] draft genome, Amel_4.0.	5e-06
SI.CL.31.cl.3112.Contig1	chr|AMe_AADG05004975|AMe_AADG05004975.1	Linkage group 13; [Apis mellifera] draft genome, Amel_4.0.	5e-06
SI.CL.24.cl.2476.Contig1	chr|AMe_AADG05002322|AMe_AADG05002322.1	Linkage group 6; [Apis mellifera] draft genome, Amel_4.0.	5e-06
SI.CL.29.cl.2925.Contig1	chr|AMe_AADG05014789|AMe_AADG05014789.1	Linkage group Un; [Apis mellifera] draft genome, Amel_4.0.	5e-06
SI.CL.31.cl.3198.Contig1	chr|AMe_AADG05002898|AMe_AADG05002898.1	Linkage group 7; [Apis mellifera] draft genome, Amel_4.0.	5e-06
SI.CL.35.cl.3500.Contig1	chr|AMe_AADG05015735|AMe_AADG05015735.1	Linkage group Un; [Apis mellifera] draft genome, Amel_4.0.	5e-06
SI.CL.30.cl.3093.Contig1	chr|AMe_AADG05007409|AMe_AADG05007409.1	Linkage group Un; [Apis mellifera] draft genome, Amel_4.0.	6e-06
SI.CL.41.cl.4123.Contig1	chr|AMe_AADG05008748|AMe_AADG05008748.1	Linkage group Un; [Apis mellifera] draft genome, Amel_4.0.	6e-06
SI.CL.20.cl.2012.Contig1	chr|AMe_AADG05006460|AMe_AADG05006460.1	Linkage group 11; [Apis mellifera] draft genome, Amel_4.0.	7e-06
SI.CL.1.cl.170.Contig1	chr|AMe_AADG05002337|AMe_AADG05002337.1	Linkage group 6; [Apis mellifera] draft genome, Amel_4.0.	7e-06
SI.CL.12.cl.1283.Contig1	chr|AMe_AADG05003900|AMe_AADG05003900.1	Linkage group 10; [Apis mellifera] draft genome, Amel_4.0.	8e-06
SI.CL.7.cl.703.Contig1	chr|AMe_AADG05016711|AMe_AADG05016711.1	Linkage group Un; [Apis mellifera] draft genome, Amel_4.0.	8e-06
SI.CL.37.cl.3736.Contig1	chr|AMe_AADG05005080|AMe_AADG05005080.1	Linkage group 14; [Apis mellifera] draft genome, Amel_4.0.	8e-06
SI.CL.36.cl.3659.Contig1	chr|AMe_AADG05003365|AMe_AADG05003365.1	Linkage group 8; [Apis mellifera] draft genome, Amel_4.0.	8e-06
SI.CL.5.cl.550.Contig1	chr|AMe_AADG05006167|AMe_AADG05006167.1	Linkage group 6; [Apis mellifera] draft genome, Amel_4.0.	8e-06
SI.CL.31.cl.3165.SiJWA07BBSR2G04.scf	chr|AMe_AADG05010078|AMe_AADG05010078.1	Linkage group Un; [Apis mellifera] draft genome, Amel_4.0.	9e-06
SI.CL.2.cl.256.Contig1	chr|AMe_AADG05003298|AMe_AADG05003298.1	Linkage group 8; [Apis mellifera] draft genome, Amel_4.0.	9e-06
SiJWA02CAD.scf	chr|AMe_AADG05007354|AMe_AADG05007354.1	Linkage group Un; [Apis mellifera] draft genome, Amel_4.0.	9e-06
SiJWD12ADA.scf	chr|AMe_AADG05004379|AMe_AADG05004379.1	Linkage group 11; [Apis mellifera] draft genome, Amel_4.0.	9e-06
SI.CL.13.cl.1325.Contig1	chr|AMe_AADG05001513|AMe_AADG05001513.1	Linkage group 3; [Apis mellifera] draft genome, Amel_4.0.	9e-06
SiJWE02AAR.scf	chr|AMe_AADG05007743|AMe_AADG05007743.1	Linkage group Un; [Apis mellifera] draft genome, Amel_4.0.	9e-06
SiJWC01ADB.scf	chr|AMe_AADG05005784|AMe_AADG05005784.1	Linkage group Un; [Apis mellifera] draft genome, Amel_4.0.	9e-06
SiJWA01ADL.scf	chr|AMe_AADG05000399|AMe_AADG05000399.1	Linkage group 1; [Apis mellifera] draft genome, Amel_4.0.	9e-06
SI.CL.42.cl.4258.Contig1	chr|AMe_AADG05012846|AMe_AADG05012846.1	Linkage group Un; [Apis mellifera] draft genome, Amel_4.0.	9e-06
SiJWB04ACY.scf	chr|AMe_AADG05008657|AMe_AADG05008657.1	Linkage group Un; [Apis mellifera] draft genome, Amel_4.0.	9e-06
SiJWF12AAY.scf	chr|AMe_AADG05000588|AMe_AADG05000588.1	Linkage group 1; [Apis mellifera] draft genome, Amel_4.0.	9e-06
SI.CL.31.cl.3165.Contig1	chr|AMe_AADG05010078|AMe_AADG05010078.1	Linkage group Un; [Apis mellifera] draft genome, Amel_4.0.	9e-06
SI.CL.24.cl.2473.Contig1	chr|AMe_AADG05006048|AMe_AADG05006048.1	Linkage group Un; [Apis mellifera] draft genome, Amel_4.0.	9e-06
SI.CL.25.cl.2580.SiJWE07ADS.scf	chr|AMe_AADG05015571|AMe_AADG05015571.1	Linkage group Un; [Apis mellifera] draft genome, Amel_4.0.	9e-06
SI.CL.12.cl.1227.SiJWB08BBN2.scf	chr|AMe_AADG05000450|AMe_AADG05000450.1	Linkage group 1; [Apis mellifera] draft genome, Amel_4.0.	9e-06
SiJWA03AAK.scf	chr|AMe_AADG05004755|AMe_AADG05004755.1	Linkage group 13; [Apis mellifera] draft genome, Amel_4.0.	9e-06
SiJWB11ACK.scf	chr|AMe_AADG05001421|AMe_AADG05001421.1	Linkage group 3; [Apis mellifera] draft genome, Amel_4.0.	9e-06
SiJWD04CAN2.scf	chr|AMe_AADG05000488|AMe_AADG05000488.1	Linkage group 1; [Apis mellifera] draft genome, Amel_4.0.	1e-05
SiJWA01CAO2.scf	chr|AMe_AADG05000149|AMe_AADG05000149.1	Linkage group 1; [Apis mellifera] draft genome, Amel_4.0.	1e-05
SI.CL.32.cl.3270.SiJWC08BDM2.scf	chr|AMe_AADG05006385|AMe_AADG05006385.1	Linkage group 1; [Apis mellifera] draft genome, Amel_4.0.	1e-05
SI.CL.30.cl.3018.Contig1	chr|AMe_AADG05002346|AMe_AADG05002346.1	Linkage group 6; [Apis mellifera] draft genome, Amel_4.0.	1e-05
SiJWD11AAO.scf	chr|AMe_AADG05001354|AMe_AADG05001354.1	Linkage group 3; [Apis mellifera] draft genome, Amel_4.0.	1e-05
SiJWC08AA1.tag5_C08_06.scf	chr|AMe_AADG05005713|AMe_AADG05005713.1	Linkage group 16; [Apis mellifera] draft genome, Amel_4.0.	1e-05
SiJWD06AAO.scf	chr|AMe_AADG05000836|AMe_AADG05000836.1	Linkage group 2; [Apis mellifera] draft genome, Amel_4.0.	1e-05
SiJWC09CAH2.scf	chr|AMe_AADG05001562|AMe_AADG05001562.1	Linkage group 4; [Apis mellifera] draft genome, Amel_4.0.	1e-05
SiJWH09BCR.scf	chr|AMe_AADG05006741|AMe_AADG05006741.1	Linkage group 3; [Apis mellifera] draft genome, Amel_4.0.	1e-05
SI.CL.40.cl.4077.Contig1	chr|AMe_AADG05004773|AMe_AADG05004773.1	Linkage group 13; [Apis mellifera] draft genome, Amel_4.0.	1e-05
SiJWF03ADH.scf	chr|AMe_AADG05006454|AMe_AADG05006454.1	Linkage group Un; [Apis mellifera] draft genome, Amel_4.0.	1e-05
SI.CL.2.cl.299.Contig1	chr|AMe_AADG05001890|AMe_AADG05001890.1	Linkage group 5; [Apis mellifera] draft genome, Amel_4.0.	1e-05
SiJWE06AAL.scf	chr|AMe_AADG05003786|AMe_AADG05003786.1	Linkage group 10; [Apis mellifera] draft genome, Amel_4.0.	1e-05
SiJWG03AAG.scf	chr|AMe_AADG05002466|AMe_AADG05002466.1	Linkage group 6; [Apis mellifera] draft genome, Amel_4.0.	1e-05
SI.CL.3.cl.350.SiJWA07BAP.scf	chr|AMe_AADG05003298|AMe_AADG05003298.1	Linkage group 8; [Apis mellifera] draft genome, Amel_4.0.	1e-05
SI.CL.13.cl.1325.SiJWG12ABH.scf	chr|AMe_AADG05001513|AMe_AADG05001513.1	Linkage group 3; [Apis mellifera] draft genome, Amel_4.0.	1e-05
SiJWF05ACT.scf	chr|AMe_AADG05006818|AMe_AADG05006818.1	Linkage group 8; [Apis mellifera] draft genome, Amel_4.0.	1e-05
SI.CL.21.cl.2126.Contig1	chr|AMe_AADG05007531|AMe_AADG05007531.1	Linkage group 12; [Apis mellifera] draft genome, Amel_4.0.	1e-05
SiJWE04BDM2.scf	chr|AMe_AADG05003749|AMe_AADG05003749.1	Linkage group 10; [Apis mellifera] draft genome, Amel_4.0.	1e-05
SI.CL.40.cl.4098.Contig1	chr|AMe_AADG05014394|AMe_AADG05014394.1	Linkage group Un; [Apis mellifera] draft genome, Amel_4.0.	1e-05
SI.CL.12.cl.1227.SiJWC12CAL2.scf	chr|AMe_AADG05000450|AMe_AADG05000450.1	Linkage group 1; [Apis mellifera] draft genome, Amel_4.0.	1e-05
SiJWC08CAQ2.scf	chr|AMe_AADG05004614|AMe_AADG05004614.1	Linkage group 12; [Apis mellifera] draft genome, Amel_4.0.	1e-05
SI.CL.25.cl.2580.SiJWC12BBX.scf	chr|AMe_AADG05015571|AMe_AADG05015571.1	Linkage group Un; [Apis mellifera] draft genome, Amel_4.0.	1e-05
SI.CL.3.cl.379.SiJWE05BDZ.scf	chr|AMe_AADG05003013|AMe_AADG05003013.1	Linkage group 8; [Apis mellifera] draft genome, Amel_4.0.	1e-05
SI.CL.15.cl.1584.Contig1	chr|AMe_AADG05005380|AMe_AADG05005380.1	Linkage group 15; [Apis mellifera] draft genome, Amel_4.0.	1e-05
SiJWF06AAC2.scf	chr|AMe_AADG05017668|AMe_AADG05017668.1	Linkage group Un; [Apis mellifera] draft genome, Amel_4.0.	1e-05
SI.CL.3.cl.350.Contig1	chr|AMe_AADG05003298|AMe_AADG05003298.1	Linkage group 8; [Apis mellifera] draft genome, Amel_4.0.	1e-05
SiJWG04BDB2.scf	chr|AMe_AADG05003047|AMe_AADG05003047.1	Linkage group 8; [Apis mellifera] draft genome, Amel_4.0.	1e-05
SiJWH07ACK.scf	chr|AMe_AADG05001094|AMe_AADG05001094.1	Linkage group 2; [Apis mellifera] draft genome, Amel_4.0.	1e-05
SiJWA09CAM2.scf	chr|AMe_AADG05009647|AMe_AADG05009647.1	Linkage group Un; [Apis mellifera] draft genome, Amel_4.0.	1e-05
SiJWC06BBS.scf	chr|AMe_AADG05007131|AMe_AADG05007131.1	Linkage group Un; [Apis mellifera] draft genome, Amel_4.0.	1e-05
SI.CL.22.cl.2298.SiJWH05BCV.scf	chr|AMe_AADG05000977|AMe_AADG05000977.1	Linkage group 2; [Apis mellifera] draft genome, Amel_4.0.	1e-05
