# Supplementary material for: An annotated cDNA library and microarray for large-scale gene-expression studies in the ant Solenopsis invicta
Source: Genome Biol. 2007 Jan 15;8(1):R9. doi: 10.1186/gb-2007-8-1-r9 (PMC1839134; doi:10.1186/gb-2007-8-1-r9)
Supplement: Additional data file 3 — GO annotations for all assembled transcripts based on blastx searches [file gb-2007-8-1-r9-S3.xls]

## Sheet: Sup_Table_B.txt
Additional data file 3: GO annotation of the fire ant assembled sequences based on blastx searches
This spreadsheet is in a standard GO annotation file format. The DB_Object_IDs correspond to the fire ant assembled sequence IDs
DB	DB_Object_ID	DB_Object_Symbol	Qualifier	GO ID	DB:Reference (|DB:Reference)	Evidence	With (or) From	Aspect	DB_Object_Name	DB_Object_Synonym (|Synonym)	DB_Object_Type	taxon(|taxon)	Date	Assigned_by
Uniprot	SI.CL.7.cl.755.Contig1	SI.CL.7.cl.755.Contig1		GO:0005634	SP:Q71DE4_DROYA	IEA		C	NOT_ASSIGNED		transcript	taxon:13686	20060515	Uniprot
Uniprot	SI.CL.39.cl.3930.SiJWG12AA1.tag5_G12_14.scf	SI.CL.39.cl.3930.SiJWG12AA1.tag5_G12_14.scf		GO:0008236	SP:Q4RYZ3_TETNG	IEA		F	NOT_ASSIGNED		transcript	taxon:13686	20060515	Uniprot
Uniprot	SI.CL.39.cl.3930.SiJWG12AA1.tag5_G12_14.scf	SI.CL.39.cl.3930.SiJWG12AA1.tag5_G12_14.scf		GO:0016787	SP:Q4RYZ3_TETNG	IEA		F	NOT_ASSIGNED		transcript	taxon:13686	20060515	Uniprot
Uniprot	SI.CL.39.cl.3930.SiJWG12AA1.tag5_G12_14.scf	SI.CL.39.cl.3930.SiJWG12AA1.tag5_G12_14.scf		GO:0005764	SP:Q4RYZ3_TETNG	IEA		C	NOT_ASSIGNED		transcript	taxon:13686	20060515	Uniprot
Uniprot	SI.CL.39.cl.3930.SiJWG12AA1.tag5_G12_14.scf	SI.CL.39.cl.3930.SiJWG12AA1.tag5_G12_14.scf		GO:0008233	SP:Q4RYZ3_TETNG	IEA		F	NOT_ASSIGNED		transcript	taxon:13686	20060515	Uniprot
Uniprot	SI.CL.39.cl.3930.SiJWG12AA1.tag5_G12_14.scf	SI.CL.39.cl.3930.SiJWG12AA1.tag5_G12_14.scf		GO:0006508	SP:Q4RYZ3_TETNG	IEA		P	NOT_ASSIGNED		transcript	taxon:13686	20060515	Uniprot
Uniprot	SI.CL.39.cl.3930.SiJWG12AA1.tag5_G12_14.scf	SI.CL.39.cl.3930.SiJWG12AA1.tag5_G12_14.scf		GO:0003824	SP:Q4RYZ3_TETNG	IEA		F	NOT_ASSIGNED		transcript	taxon:13686	20060515	Uniprot
Uniprot	SiJWC05BAI.scf	SiJWC05BAI.scf		GO:0016564	SP:Q7PXB6_ANOGA	IEA		F	NOT_ASSIGNED		transcript	taxon:13686	20060515	Uniprot
Uniprot	SiJWC05BAI.scf	SiJWC05BAI.scf		GO:0016491	SP:BLVRB_HUMAN	IEA		F	NOT_ASSIGNED		transcript	taxon:13686	20060515	Uniprot
Uniprot	SiJWC05BAI.scf	SiJWC05BAI.scf		GO:0009225	SP:BLVRB_HUMAN	IEA		P	NOT_ASSIGNED		transcript	taxon:13686	20060515	Uniprot
Uniprot	SiJWC05BAI.scf	SiJWC05BAI.scf		GO:0042602	SP:BLVRB_HUMAN	IEA		F	NOT_ASSIGNED		transcript	taxon:13686	20060515	Uniprot
Uniprot	SiJWC05BAI.scf	SiJWC05BAI.scf		GO:0004074	SP:BLVRB_HUMAN	IEA		F	NOT_ASSIGNED		transcript	taxon:13686	20060515	Uniprot
Uniprot	SiJWC05BAI.scf	SiJWC05BAI.scf		GO:0006808	SP:Q7PXB6_ANOGA	IEA		P	NOT_ASSIGNED		transcript	taxon:13686	20060515	Uniprot
Uniprot	SiJWC05BAI.scf	SiJWC05BAI.scf		GO:0051287	SP:BLVRB_HUMAN	IEA		F	NOT_ASSIGNED		transcript	taxon:13686	20060515	Uniprot
Uniprot	SiJWC05BAI.scf	SiJWC05BAI.scf		GO:0003824	SP:Q4RFW2_TETNG	IEA		F	NOT_ASSIGNED		transcript	taxon:13686	20060515	Uniprot
Uniprot	SiJWG05ADX.scf	SiJWG05ADX.scf		GO:0007601	SP:NONA_DROVI	IEA		P	NOT_ASSIGNED		transcript	taxon:13686	20060515	Uniprot
Uniprot	SiJWG05ADX.scf	SiJWG05ADX.scf		GO:0005634	SP:HRP65_CHITE	IEA		C	NOT_ASSIGNED		transcript	taxon:13686	20060515	Uniprot
Uniprot	SiJWG05ADX.scf	SiJWG05ADX.scf		GO:0007632	SP:NONA_DROVI	IEA		P	NOT_ASSIGNED		transcript	taxon:13686	20060515	Uniprot
Uniprot	SiJWG05ADX.scf	SiJWG05ADX.scf		GO:0003676	SP:Q91017_CHICK	IEA		F	NOT_ASSIGNED		transcript	taxon:13686	20060515	Uniprot
Uniprot	SiJWG05ADX.scf	SiJWG05ADX.scf		GO:0003723	SP:HRP65_CHITE	IEA		F	NOT_ASSIGNED		transcript	taxon:13686	20060515	Uniprot
Uniprot	SiJWG05ADX.scf	SiJWG05ADX.scf		GO:0000166	SP:Q91017_CHICK	IEA		F	NOT_ASSIGNED		transcript	taxon:13686	20060515	Uniprot
Uniprot	SiJWG05ADX.scf	SiJWG05ADX.scf		GO:0045433	SP:NONA_DROVI	IEA		P	NOT_ASSIGNED		transcript	taxon:13686	20060515	Uniprot
Uniprot	SiJWG05ADX.scf	SiJWG05ADX.scf		GO:0003729	SP:NONA_DROVI	IEA		F	NOT_ASSIGNED		transcript	taxon:13686	20060515	Uniprot
Uniprot	SiJWG05ADX.scf	SiJWG05ADX.scf		GO:0008372	SP:NONA_DROVI	IEA		C	NOT_ASSIGNED		transcript	taxon:13686	20060515	Uniprot
Uniprot	SiJWG05ADX.scf	SiJWG05ADX.scf		GO:0005737	SP:HRP65_CHITE	IEA		C	NOT_ASSIGNED		transcript	taxon:13686	20060515	Uniprot
Uniprot	SiJWG05ADX.scf	SiJWG05ADX.scf		GO:0042331	SP:NONA_DROVI	IEA		P	NOT_ASSIGNED		transcript	taxon:13686	20060515	Uniprot
Uniprot	SiJWG05ADX.scf	SiJWG05ADX.scf		GO:0050896	SP:NONA_DROVI	IEA		P	NOT_ASSIGNED		transcript	taxon:13686	20060515	Uniprot
Uniprot	SiJWG05ADX.scf	SiJWG05ADX.scf		GO:0006406	SP:HRP65_CHITE	IEA		P	NOT_ASSIGNED		transcript	taxon:13686	20060515	Uniprot
Uniprot	SI.CL.3.cl.320.Contig2	SI.CL.3.cl.320.Contig2		GO:0016068	SP:GST1_BLAGE	IEA		P	NOT_ASSIGNED		transcript	taxon:13686	20060515	Uniprot
Uniprot	SI.CL.3.cl.320.Contig2	SI.CL.3.cl.320.Contig2		GO:0004364	SP:GST1_BLAGE	IEA		F	NOT_ASSIGNED		transcript	taxon:13686	20060515	Uniprot
Uniprot	SI.CL.3.cl.320.Contig2	SI.CL.3.cl.320.Contig2		GO:0016740	SP:GST1_BLAGE	IEA		F	NOT_ASSIGNED		transcript	taxon:13686	20060515	Uniprot
Uniprot	SI.CL.29.cl.2963.Contig1	SI.CL.29.cl.2963.Contig1		GO:0006396	SP:Q4RV55_TETNG	IEA		P	NOT_ASSIGNED		transcript	taxon:13686	20060515	Uniprot
Uniprot	SI.CL.29.cl.2963.Contig1	SI.CL.29.cl.2963.Contig1		GO:0003676	SP:Q4RV55_TETNG	IEA		F	NOT_ASSIGNED		transcript	taxon:13686	20060515	Uniprot
Uniprot	SI.CL.29.cl.2963.Contig1	SI.CL.29.cl.2963.Contig1		GO:0000398	SP:SF04_HUMAN	IEA		P	NOT_ASSIGNED		transcript	taxon:13686	20060515	Uniprot
Uniprot	SI.CL.29.cl.2963.Contig1	SI.CL.29.cl.2963.Contig1		GO:0005622	SP:Q4RV55_TETNG	IEA		C	NOT_ASSIGNED		transcript	taxon:13686	20060515	Uniprot
Uniprot	SI.CL.29.cl.2963.Contig1	SI.CL.29.cl.2963.Contig1		GO:0005681	SP:SF04_HUMAN	IEA		C	NOT_ASSIGNED		transcript	taxon:13686	20060515	Uniprot
Uniprot	SI.CL.29.cl.2963.Contig1	SI.CL.29.cl.2963.Contig1		GO:0003723	SP:SF04_HUMAN	IEA		F	NOT_ASSIGNED		transcript	taxon:13686	20060515	Uniprot
Uniprot	SI.CL.8.cl.871.Contig1	SI.CL.8.cl.871.Contig1		GO:0046872	SP:SAR1B_CRIGR	IEA		F	NOT_ASSIGNED		transcript	taxon:13686	20060515	Uniprot
Uniprot	SI.CL.8.cl.871.Contig1	SI.CL.8.cl.871.Contig1		GO:0016020	SP:SAR1B_HUMAN	IEA		C	NOT_ASSIGNED		transcript	taxon:13686	20060515	Uniprot
Uniprot	SI.CL.8.cl.871.Contig1	SI.CL.8.cl.871.Contig1		GO:0015031	SP:Q4ZJK0_PIG	IEA		P	NOT_ASSIGNED		transcript	taxon:13686	20060515	Uniprot
Uniprot	SI.CL.8.cl.871.Contig1	SI.CL.8.cl.871.Contig1		GO:0005795	SP:SAR1B_HUMAN	IEA		C	NOT_ASSIGNED		transcript	taxon:13686	20060515	Uniprot
Uniprot	SI.CL.8.cl.871.Contig1	SI.CL.8.cl.871.Contig1		GO:0006888	SP:SAR1B_HUMAN	IEA		P	NOT_ASSIGNED		transcript	taxon:13686	20060515	Uniprot
Uniprot	SI.CL.8.cl.871.Contig1	SI.CL.8.cl.871.Contig1		GO:0005525	SP:SAR1B_HUMAN	IEA		F	NOT_ASSIGNED		transcript	taxon:13686	20060515	Uniprot
Uniprot	SI.CL.8.cl.871.Contig1	SI.CL.8.cl.871.Contig1		GO:0000287	SP:SAR1B_HUMAN	IEA		F	NOT_ASSIGNED		transcript	taxon:13686	20060515	Uniprot
Uniprot	SI.CL.8.cl.871.Contig1	SI.CL.8.cl.871.Contig1		GO:0000166	SP:SAR1B_HUMAN	IEA		F	NOT_ASSIGNED		transcript	taxon:13686	20060515	Uniprot
Uniprot	SI.CL.8.cl.871.Contig1	SI.CL.8.cl.871.Contig1		GO:0007264	SP:SAR1B_HUMAN	IEA		P	NOT_ASSIGNED		transcript	taxon:13686	20060515	Uniprot
Uniprot	SI.CL.8.cl.871.Contig1	SI.CL.8.cl.871.Contig1		GO:0005783	SP:SAR1B_HUMAN	IEA		C	NOT_ASSIGNED		transcript	taxon:13686	20060515	Uniprot
Uniprot	SI.CL.8.cl.871.Contig1	SI.CL.8.cl.871.Contig1		GO:0006886	SP:SAR1B_HUMAN	IEA		P	NOT_ASSIGNED		transcript	taxon:13686	20060515	Uniprot
Uniprot	SI.CL.8.cl.871.Contig1	SI.CL.8.cl.871.Contig1		GO:0005622	SP:SAR1B_HUMAN	IEA		C	NOT_ASSIGNED		transcript	taxon:13686	20060515	Uniprot
Uniprot	SI.CL.8.cl.871.Contig1	SI.CL.8.cl.871.Contig1		GO:0006810	SP:Q4ZJK0_PIG	IEA		P	NOT_ASSIGNED		transcript	taxon:13686	20060515	Uniprot
Uniprot	SI.CL.17.cl.1741.Contig2	SI.CL.17.cl.1741.Contig2		GO:0042302	SP:O96052_BOMMO	IEA		F	NOT_ASSIGNED		transcript	taxon:13686	20060515	Uniprot
Uniprot	SI.CL.17.cl.1741.Contig2	SI.CL.17.cl.1741.Contig2		GO:0005198	SP:CU12_HYACE	IEA		F	NOT_ASSIGNED		transcript	taxon:13686	20060515	Uniprot
Uniprot	SiJWD12CAG.scf	SiJWD12CAG.scf		GO:0005634	SP:Q5ZL58_CHICK	IEA		C	NOT_ASSIGNED		transcript	taxon:13686	20060515	Uniprot
Uniprot	SiJWD12CAG.scf	SiJWD12CAG.scf		GO:0006397	SP:Q5ZL58_CHICK	IEA		P	NOT_ASSIGNED		transcript	taxon:13686	20060515	Uniprot
Uniprot	SiJWD12CAG.scf	SiJWD12CAG.scf		GO:0005732	SP:Q5ZL58_CHICK	IEA		C	NOT_ASSIGNED		transcript	taxon:13686	20060515	Uniprot
Uniprot	SiJWD12CAG.scf	SiJWD12CAG.scf		GO:0030529	SP:SMD3_XENLA	IEA		C	NOT_ASSIGNED		transcript	taxon:13686	20060515	Uniprot
Uniprot	SiJWD12CAG.scf	SiJWD12CAG.scf		GO:0005515	SP:SMD3_HUMAN	IEA		F	NOT_ASSIGNED		transcript	taxon:13686	20060515	Uniprot
Uniprot	SiJWD12CAG.scf	SiJWD12CAG.scf		GO:0000398	SP:SMD3_HUMAN	IEA		P	NOT_ASSIGNED		transcript	taxon:13686	20060515	Uniprot
Uniprot	SiJWC03CAK2.scf	SiJWC03CAK2.scf		GO:0003964	SP:Q24736_DROVI	IEA		F	NOT_ASSIGNED		transcript	taxon:13686	20060515	Uniprot
Uniprot	SiJWC03CAK2.scf	SiJWC03CAK2.scf		GO:0006278	SP:Q24736_DROVI	IEA		P	NOT_ASSIGNED		transcript	taxon:13686	20060515	Uniprot
Uniprot	SiJWC03CAK2.scf	SiJWC03CAK2.scf		GO:0003723	SP:Q24736_DROVI	IEA		F	NOT_ASSIGNED		transcript	taxon:13686	20060515	Uniprot
Uniprot	SiJWE12ACB.scf	SiJWE12ACB.scf		GO:0000166	SP:RU2B_HUMAN	IEA		F	NOT_ASSIGNED		transcript	taxon:13686	20060515	Uniprot
Uniprot	SiJWE12ACB.scf	SiJWE12ACB.scf		GO:0003676	SP:Q3HR40_BOMMO	IEA		F	NOT_ASSIGNED		transcript	taxon:13686	20060515	Uniprot
Uniprot	SiJWE12ACB.scf	SiJWE12ACB.scf		GO:0008380	SP:RU2B_HUMAN	IEA		P	NOT_ASSIGNED		transcript	taxon:13686	20060515	Uniprot
Uniprot	SiJWE12ACB.scf	SiJWE12ACB.scf		GO:0005515	SP:RU2B_HUMAN	IEA		F	NOT_ASSIGNED		transcript	taxon:13686	20060515	Uniprot
Uniprot	SiJWE12ACB.scf	SiJWE12ACB.scf		GO:0005686	SP:RU2B_HUMAN	IEA		C	NOT_ASSIGNED		transcript	taxon:13686	20060515	Uniprot
Uniprot	SiJWE12ACB.scf	SiJWE12ACB.scf		GO:0000398	SP:RU2B_HUMAN	IEA		P	NOT_ASSIGNED		transcript	taxon:13686	20060515	Uniprot
Uniprot	SiJWE12ACB.scf	SiJWE12ACB.scf		GO:0005681	SP:RU2B_HUMAN	IEA		C	NOT_ASSIGNED		transcript	taxon:13686	20060515	Uniprot
Uniprot	SiJWE12ACB.scf	SiJWE12ACB.scf		GO:0003723	SP:RU2B_HUMAN	IEA		F	NOT_ASSIGNED		transcript	taxon:13686	20060515	Uniprot
Uniprot	SiJWC09AAV.scf	SiJWC09AAV.scf		GO:0000004	SP:BC10_BOVIN	IEA		P	NOT_ASSIGNED		transcript	taxon:13686	20060515	Uniprot
Uniprot	SiJWC09AAV.scf	SiJWC09AAV.scf		GO:0016020	SP:BC10_BOVIN	IEA		C	NOT_ASSIGNED		transcript	taxon:13686	20060515	Uniprot
Uniprot	SiJWC09AAV.scf	SiJWC09AAV.scf		GO:0005554	SP:BC10_BOVIN	IEA		F	NOT_ASSIGNED		transcript	taxon:13686	20060515	Uniprot
Uniprot	SiJWC09AAV.scf	SiJWC09AAV.scf		GO:0016021	SP:BC10_BOVIN	IEA		C	NOT_ASSIGNED		transcript	taxon:13686	20060515	Uniprot
Uniprot	SI.CL.7.cl.783.SiJWE01ACM.scf	SI.CL.7.cl.783.SiJWE01ACM.scf		GO:0004185	SP:RISC_HUMAN	IEA		F	NOT_ASSIGNED		transcript	taxon:13686	20060515	Uniprot
Uniprot	SI.CL.7.cl.783.SiJWE01ACM.scf	SI.CL.7.cl.783.SiJWE01ACM.scf		GO:0016787	SP:Q5PQ28_XENLA	IEA		F	NOT_ASSIGNED		transcript	taxon:13686	20060515	Uniprot
Uniprot	SI.CL.7.cl.783.SiJWE01ACM.scf	SI.CL.7.cl.783.SiJWE01ACM.scf		GO:0008233	SP:RISC_HUMAN	IEA		F	NOT_ASSIGNED		transcript	taxon:13686	20060515	Uniprot
Uniprot	SI.CL.7.cl.783.SiJWE01ACM.scf	SI.CL.7.cl.783.SiJWE01ACM.scf		GO:0006508	SP:RISC_HUMAN	IEA		P	NOT_ASSIGNED		transcript	taxon:13686	20060515	Uniprot
Uniprot	SI.CL.7.cl.783.SiJWE01ACM.scf	SI.CL.7.cl.783.SiJWE01ACM.scf		GO:0003824	SP:Q4S091_TETNG	IEA		F	NOT_ASSIGNED		transcript	taxon:13686	20060515	Uniprot
Uniprot	SI.CL.18.cl.1885.Contig1	SI.CL.18.cl.1885.Contig1		GO:0005488	SP:Q61UP2_CAEBR	IEA		F	NOT_ASSIGNED		transcript	taxon:13686	20060515	Uniprot
Uniprot	SI.CL.18.cl.1885.Contig1	SI.CL.18.cl.1885.Contig1		GO:0016020	SP:Q8WTN7_COTKA	IEA		C	NOT_ASSIGNED		transcript	taxon:13686	20060515	Uniprot
Uniprot	SI.CL.18.cl.1885.Contig1	SI.CL.18.cl.1885.Contig1		GO:0016021	SP:Q8WTN7_COTKA	IEA		C	NOT_ASSIGNED		transcript	taxon:13686	20060515	Uniprot
Uniprot	SI.CL.18.cl.1885.Contig1	SI.CL.18.cl.1885.Contig1		GO:0000166	SP:Q61UP2_CAEBR	IEA		F	NOT_ASSIGNED		transcript	taxon:13686	20060515	Uniprot
Uniprot	SI.CL.18.cl.1885.Contig1	SI.CL.18.cl.1885.Contig1		GO:0004674	SP:Q61UP2_CAEBR	IEA		F	NOT_ASSIGNED		transcript	taxon:13686	20060515	Uniprot
Uniprot	SI.CL.18.cl.1885.Contig1	SI.CL.18.cl.1885.Contig1		GO:0005524	SP:Q61UP2_CAEBR	IEA		F	NOT_ASSIGNED		transcript	taxon:13686	20060515	Uniprot
Uniprot	SI.CL.18.cl.1885.Contig1	SI.CL.18.cl.1885.Contig1		GO:0006468	SP:Q61UP2_CAEBR	IEA		P	NOT_ASSIGNED		transcript	taxon:13686	20060515	Uniprot
Uniprot	SI.CL.18.cl.1885.Contig1	SI.CL.18.cl.1885.Contig1		GO:0016301	SP:Q61UP2_CAEBR	IEA		F	NOT_ASSIGNED		transcript	taxon:13686	20060515	Uniprot
Uniprot	SI.CL.18.cl.1885.Contig1	SI.CL.18.cl.1885.Contig1		GO:0004672	SP:Q61UP2_CAEBR	IEA		F	NOT_ASSIGNED		transcript	taxon:13686	20060515	Uniprot
Uniprot	SI.CL.18.cl.1885.Contig1	SI.CL.18.cl.1885.Contig1		GO:0016740	SP:Q61UP2_CAEBR	IEA		F	NOT_ASSIGNED		transcript	taxon:13686	20060515	Uniprot
Uniprot	SiJWB08BCR.scf	SiJWB08BCR.scf		GO:0003964	SP:Q4QQD4_SCHMA	IEA		F	NOT_ASSIGNED		transcript	taxon:13686	20060515	Uniprot
Uniprot	SiJWB08BCR.scf	SiJWB08BCR.scf		GO:0003677	SP:Q4QQD4_SCHMA	IEA		F	NOT_ASSIGNED		transcript	taxon:13686	20060515	Uniprot
Uniprot	SiJWB08BCR.scf	SiJWB08BCR.scf		GO:0008233	SP:Q5TNP3_ANOGA	IEA		F	NOT_ASSIGNED		transcript	taxon:13686	20060515	Uniprot
Uniprot	SiJWB08BCR.scf	SiJWB08BCR.scf		GO:0006508	SP:Q5TNP3_ANOGA	IEA		P	NOT_ASSIGNED		transcript	taxon:13686	20060515	Uniprot
Uniprot	SiJWB08BCR.scf	SiJWB08BCR.scf		GO:0006278	SP:Q4QQD4_SCHMA	IEA		P	NOT_ASSIGNED		transcript	taxon:13686	20060515	Uniprot
Uniprot	SiJWB08BCR.scf	SiJWB08BCR.scf		GO:0004190	SP:Q5TNP3_ANOGA	IEA		F	NOT_ASSIGNED		transcript	taxon:13686	20060515	Uniprot
Uniprot	SiJWB08BCR.scf	SiJWB08BCR.scf		GO:0015074	SP:Q4QQD4_SCHMA	IEA		P	NOT_ASSIGNED		transcript	taxon:13686	20060515	Uniprot
Uniprot	SiJWB08BCR.scf	SiJWB08BCR.scf		GO:0003723	SP:Q4QQD4_SCHMA	IEA		F	NOT_ASSIGNED		transcript	taxon:13686	20060515	Uniprot
Uniprot	SiJWH04BDU2.scf	SiJWH04BDU2.scf		GO:0003964	SP:O44317_9ARAC	IEA		F	NOT_ASSIGNED		transcript	taxon:13686	20060515	Uniprot
Uniprot	SiJWH04BDU2.scf	SiJWH04BDU2.scf		GO:0016779	SP:PO12_NASVI	IEA		F	NOT_ASSIGNED		transcript	taxon:13686	20060515	Uniprot
Uniprot	SiJWH04BDU2.scf	SiJWH04BDU2.scf		GO:0003676	SP:O44317_9ARAC	IEA		F	NOT_ASSIGNED		transcript	taxon:13686	20060515	Uniprot
Uniprot	SiJWH04BDU2.scf	SiJWH04BDU2.scf		GO:0004518	SP:PO12_NASVI	IEA		F	NOT_ASSIGNED		transcript	taxon:13686	20060515	Uniprot
Uniprot	SiJWH04BDU2.scf	SiJWH04BDU2.scf		GO:0004519	SP:PO12_NASVI	IEA		F	NOT_ASSIGNED		transcript	taxon:13686	20060515	Uniprot
Uniprot	SiJWH04BDU2.scf	SiJWH04BDU2.scf		GO:0003723	SP:O44317_9ARAC	IEA		F	NOT_ASSIGNED		transcript	taxon:13686	20060515	Uniprot
Uniprot	SiJWH04BDU2.scf	SiJWH04BDU2.scf		GO:0004523	SP:O44317_9ARAC	IEA		F	NOT_ASSIGNED		transcript	taxon:13686	20060515	Uniprot
Uniprot	SiJWH04BDU2.scf	SiJWH04BDU2.scf		GO:0006313	SP:PO12_NASVI	IEA		P	NOT_ASSIGNED		transcript	taxon:13686	20060515	Uniprot
Uniprot	SiJWH04BDU2.scf	SiJWH04BDU2.scf		GO:0016787	SP:PO12_NASVI	IEA		F	NOT_ASSIGNED		transcript	taxon:13686	20060515	Uniprot
Uniprot	SiJWH04BDU2.scf	SiJWH04BDU2.scf		GO:0006278	SP:O44317_9ARAC	IEA		P	NOT_ASSIGNED		transcript	taxon:13686	20060515	Uniprot
Uniprot	SiJWH04BDU2.scf	SiJWH04BDU2.scf		GO:0016740	SP:PO12_NASVI	IEA		F	NOT_ASSIGNED		transcript	taxon:13686	20060515	Uniprot
Uniprot	SI.CL.28.cl.2832.Contig1	SI.CL.28.cl.2832.Contig1		GO:0019843	SP:Q9BYC9_HUMAN	IEA		F	NOT_ASSIGNED		transcript	taxon:13686	20060515	Uniprot
Uniprot	SI.CL.28.cl.2832.Contig1	SI.CL.28.cl.2832.Contig1		GO:0005840	SP:Q9BYC9_HUMAN	IEA		C	NOT_ASSIGNED		transcript	taxon:13686	20060515	Uniprot
Uniprot	SI.CL.28.cl.2832.Contig1	SI.CL.28.cl.2832.Contig1		GO:0006412	SP:Q9BYC9_HUMAN	IEA		P	NOT_ASSIGNED		transcript	taxon:13686	20060515	Uniprot
Uniprot	SI.CL.28.cl.2832.Contig1	SI.CL.28.cl.2832.Contig1		GO:0030529	SP:Q4RXN3_TETNG	IEA		C	NOT_ASSIGNED		transcript	taxon:13686	20060515	Uniprot
Uniprot	SI.CL.28.cl.2832.Contig1	SI.CL.28.cl.2832.Contig1		GO:0003735	SP:Q9BYC9_HUMAN	IEA		F	NOT_ASSIGNED		transcript	taxon:13686	20060515	Uniprot
Uniprot	SI.CL.28.cl.2832.Contig1	SI.CL.28.cl.2832.Contig1		GO:0005622	SP:Q2M0C2_DROPS	IEA		C	NOT_ASSIGNED		transcript	taxon:13686	20060515	Uniprot
Uniprot	SI.CL.28.cl.2832.Contig1	SI.CL.28.cl.2832.Contig1		GO:0003723	SP:Q2M0C2_DROPS	IEA		F	NOT_ASSIGNED		transcript	taxon:13686	20060515	Uniprot
Uniprot	SiJWD07ADJ.scf	SiJWD07ADJ.scf		GO:0005739	SP:ODC_HUMAN	IEA		C	NOT_ASSIGNED		transcript	taxon:13686	20060515	Uniprot
Uniprot	SiJWD07ADJ.scf	SiJWD07ADJ.scf		GO:0005488	SP:ODC_HUMAN	IEA		F	NOT_ASSIGNED		transcript	taxon:13686	20060515	Uniprot
Uniprot	SiJWD07ADJ.scf	SiJWD07ADJ.scf		GO:0016020	SP:ODC_HUMAN	IEA		C	NOT_ASSIGNED		transcript	taxon:13686	20060515	Uniprot
Uniprot	SiJWD07ADJ.scf	SiJWD07ADJ.scf		GO:0005215	SP:Q5TU50_ANOGA	IEA		F	NOT_ASSIGNED		transcript	taxon:13686	20060515	Uniprot
Uniprot	SiJWD07ADJ.scf	SiJWD07ADJ.scf		GO:0005743	SP:ODC_HUMAN	IEA		C	NOT_ASSIGNED		transcript	taxon:13686	20060515	Uniprot
Uniprot	SiJWD07ADJ.scf	SiJWD07ADJ.scf		GO:0016021	SP:ODC_HUMAN	IEA		C	NOT_ASSIGNED		transcript	taxon:13686	20060515	Uniprot
Uniprot	SiJWD07ADJ.scf	SiJWD07ADJ.scf		GO:0006810	SP:ODC_HUMAN	IEA		P	NOT_ASSIGNED		transcript	taxon:13686	20060515	Uniprot
Uniprot	SI.CL.16.cl.1692.Contig1	SI.CL.16.cl.1692.Contig1		GO:0016787	SP:Q61GJ9_CAEBR	IEA		F	NOT_ASSIGNED		transcript	taxon:13686	20060515	Uniprot
Uniprot	SI.CL.16.cl.1692.Contig1	SI.CL.16.cl.1692.Contig1		GO:0006685	SP:Q61GJ9_CAEBR	IEA		P	NOT_ASSIGNED		transcript	taxon:13686	20060515	Uniprot
Uniprot	SI.CL.16.cl.1692.Contig1	SI.CL.16.cl.1692.Contig1		GO:0004767	SP:Q61GJ9_CAEBR	IEA		F	NOT_ASSIGNED		transcript	taxon:13686	20060515	Uniprot
Uniprot	SiJWD10ACV.scf	SiJWD10ACV.scf		GO:0004553	SP:Q7PZA7_ANOGA	IEA		F	NOT_ASSIGNED		transcript	taxon:13686	20060515	Uniprot
Uniprot	SiJWD10ACV.scf	SiJWD10ACV.scf		GO:0030246	SP:Q7PZA7_ANOGA	IEA		F	NOT_ASSIGNED		transcript	taxon:13686	20060515	Uniprot
Uniprot	SiJWD10ACV.scf	SiJWD10ACV.scf		GO:0016021	SP:Q9NV64_HUMAN	IEA		C	NOT_ASSIGNED		transcript	taxon:13686	20060515	Uniprot
Uniprot	SiJWD10ACV.scf	SiJWD10ACV.scf		GO:0005576	SP:Q7PZA7_ANOGA	IEA		C	NOT_ASSIGNED		transcript	taxon:13686	20060515	Uniprot
Uniprot	SiJWD10ACV.scf	SiJWD10ACV.scf		GO:0005975	SP:Q7PZA7_ANOGA	IEA		P	NOT_ASSIGNED		transcript	taxon:13686	20060515	Uniprot
Uniprot	SI.CL.43.cl.4330.Contig1	SI.CL.43.cl.4330.Contig1		GO:0003677	SP:Q5TRD4_ANOGA	IEA		F	NOT_ASSIGNED		transcript	taxon:13686	20060515	Uniprot
Uniprot	SI.CL.43.cl.4330.Contig1	SI.CL.43.cl.4330.Contig1		GO:0003676	SP:Q380L2_ANOGA	IEA		F	NOT_ASSIGNED		transcript	taxon:13686	20060515	Uniprot
Uniprot	SI.CL.43.cl.4330.Contig1	SI.CL.43.cl.4330.Contig1		GO:0008270	SP:Q380L2_ANOGA	IEA		F	NOT_ASSIGNED		transcript	taxon:13686	20060515	Uniprot
Uniprot	SI.CL.43.cl.4330.Contig1	SI.CL.43.cl.4330.Contig1		GO:0006508	SP:Q5TYF5_ANOGA	IEA		P	NOT_ASSIGNED		transcript	taxon:13686	20060515	Uniprot
Uniprot	SI.CL.43.cl.4330.Contig1	SI.CL.43.cl.4330.Contig1		GO:0004190	SP:Q5TYF5_ANOGA	IEA		F	NOT_ASSIGNED		transcript	taxon:13686	20060515	Uniprot
Uniprot	SI.CL.43.cl.4330.Contig1	SI.CL.43.cl.4330.Contig1		GO:0015074	SP:Q5TRD4_ANOGA	IEA		P	NOT_ASSIGNED		transcript	taxon:13686	20060515	Uniprot
Uniprot	SI.CL.4.cl.430.SiJWH04ACE.scf	SI.CL.4.cl.430.SiJWH04ACE.scf		GO:0004866	SP:IXCI_BOOMI	IEA		F	NOT_ASSIGNED		transcript	taxon:13686	20060515	Uniprot
Uniprot	SI.CL.4.cl.430.SiJWH04ACE.scf	SI.CL.4.cl.430.SiJWH04ACE.scf		GO:0004867	SP:IXCI_BOOMI	IEA		F	NOT_ASSIGNED		transcript	taxon:13686	20060515	Uniprot
Uniprot	SI.CL.4.cl.430.SiJWH04ACE.scf	SI.CL.4.cl.430.SiJWH04ACE.scf		GO:0042742	SP:IXCI_BOOMI	IEA		P	NOT_ASSIGNED		transcript	taxon:13686	20060515	Uniprot
Uniprot	SI.CL.34.cl.3443.Contig1	SI.CL.34.cl.3443.Contig1		GO:0005622	SP:Q3B7A6_HUMAN	IEA		C	NOT_ASSIGNED		transcript	taxon:13686	20060515	Uniprot
Uniprot	SI.CL.34.cl.3443.Contig1	SI.CL.34.cl.3443.Contig1		GO:0005525	SP:Q3B7A6_HUMAN	IEA		F	NOT_ASSIGNED		transcript	taxon:13686	20060515	Uniprot
Uniprot	SiJWB03ABV.scf	SiJWB03ABV.scf		GO:0005634	SP:Q76IN8_CIOIN	IEA		C	NOT_ASSIGNED		transcript	taxon:13686	20060515	Uniprot
Uniprot	SiJWB03ABV.scf	SiJWB03ABV.scf		GO:0003964	SP:Q30KX0_SCHMA	IEA		F	NOT_ASSIGNED		transcript	taxon:13686	20060515	Uniprot
Uniprot	SiJWB03ABV.scf	SiJWB03ABV.scf		GO:0003676	SP:Q76IN8_CIOIN	IEA		F	NOT_ASSIGNED		transcript	taxon:13686	20060515	Uniprot
Uniprot	SiJWB03ABV.scf	SiJWB03ABV.scf		GO:0008270	SP:Q76IN8_CIOIN	IEA		F	NOT_ASSIGNED		transcript	taxon:13686	20060515	Uniprot
Uniprot	SiJWB03ABV.scf	SiJWB03ABV.scf		GO:0004519	SP:Q4QQE8_SCHMA	IEA		F	NOT_ASSIGNED		transcript	taxon:13686	20060515	Uniprot
Uniprot	SiJWB03ABV.scf	SiJWB03ABV.scf		GO:0006278	SP:Q30KX0_SCHMA	IEA		P	NOT_ASSIGNED		transcript	taxon:13686	20060515	Uniprot
Uniprot	SiJWB03ABV.scf	SiJWB03ABV.scf		GO:0003723	SP:Q30KX0_SCHMA	IEA		F	NOT_ASSIGNED		transcript	taxon:13686	20060515	Uniprot
Uniprot	SiJWH06ADC.scf	SiJWH06ADC.scf		GO:0000166	SP:Q5F424_CHICK	IEA		F	NOT_ASSIGNED		transcript	taxon:13686	20060515	Uniprot
Uniprot	SiJWH06ADC.scf	SiJWH06ADC.scf		GO:0005524	SP:Q5F424_CHICK	IEA		F	NOT_ASSIGNED		transcript	taxon:13686	20060515	Uniprot
Uniprot	SiJWH06ADC.scf	SiJWH06ADC.scf		GO:0005515	SP:Q2VTM7_9PERC	IEA		F	NOT_ASSIGNED		transcript	taxon:13686	20060515	Uniprot
Uniprot	SiJWH06ADC.scf	SiJWH06ADC.scf		GO:0006457	SP:Q5F424_CHICK	IEA		P	NOT_ASSIGNED		transcript	taxon:13686	20060515	Uniprot
Uniprot	SiJWH06ADC.scf	SiJWH06ADC.scf		GO:0044267	SP:Q2VTM7_9PERC	IEA		P	NOT_ASSIGNED		transcript	taxon:13686	20060515	Uniprot
Uniprot	SiJWH06ADC.scf	SiJWH06ADC.scf		GO:0051082	SP:Q5F424_CHICK	IEA		F	NOT_ASSIGNED		transcript	taxon:13686	20060515	Uniprot
Uniprot	SiJWC06BBX.scf	SiJWC06BBX.scf		GO:0006979	SP:Q66Q13_SOLIN	IEA		P	NOT_ASSIGNED		transcript	taxon:13686	20060515	Uniprot
Uniprot	SiJWC06BBX.scf	SiJWC06BBX.scf		GO:0004601	SP:Q66Q13_SOLIN	IEA		F	NOT_ASSIGNED		transcript	taxon:13686	20060515	Uniprot
Uniprot	SI.CL.18.cl.1816.Contig1	SI.CL.18.cl.1816.Contig1		GO:0046872	SP:Q4HXR9_GIBZE	IEA		F	NOT_ASSIGNED		transcript	taxon:13686	20060515	Uniprot
Uniprot	SI.CL.18.cl.1816.Contig1	SI.CL.18.cl.1816.Contig1		GO:0008287	SP:Q2UPL5_ASPOR	IEA		C	NOT_ASSIGNED		transcript	taxon:13686	20060515	Uniprot
Uniprot	SI.CL.18.cl.1816.Contig1	SI.CL.18.cl.1816.Contig1		GO:0004721	SP:Q4HXR9_GIBZE	IEA		F	NOT_ASSIGNED		transcript	taxon:13686	20060515	Uniprot
Uniprot	SI.CL.18.cl.1816.Contig1	SI.CL.18.cl.1816.Contig1		GO:0006470	SP:Q2UPL5_ASPOR	IEA		P	NOT_ASSIGNED		transcript	taxon:13686	20060515	Uniprot
Uniprot	SI.CL.18.cl.1816.Contig1	SI.CL.18.cl.1816.Contig1		GO:0000287	SP:Q4HXR9_GIBZE	IEA		F	NOT_ASSIGNED		transcript	taxon:13686	20060515	Uniprot
Uniprot	SI.CL.18.cl.1816.Contig1	SI.CL.18.cl.1816.Contig1		GO:0016787	SP:Q4HXR9_GIBZE	IEA		F	NOT_ASSIGNED		transcript	taxon:13686	20060515	Uniprot
Uniprot	SI.CL.18.cl.1816.Contig1	SI.CL.18.cl.1816.Contig1		GO:0003824	SP:Q2UPL5_ASPOR	IEA		F	NOT_ASSIGNED		transcript	taxon:13686	20060515	Uniprot
Uniprot	SI.CL.18.cl.1816.Contig1	SI.CL.18.cl.1816.Contig1		GO:0004722	SP:Q2UPL5_ASPOR	IEA		F	NOT_ASSIGNED		transcript	taxon:13686	20060515	Uniprot
Uniprot	SI.CL.9.cl.934.Contig1	SI.CL.9.cl.934.Contig1		GO:0048037	SP:O01678_BOMMO	IEA		F	NOT_ASSIGNED		transcript	taxon:13686	20060515	Uniprot
Uniprot	SI.CL.9.cl.934.Contig1	SI.CL.9.cl.934.Contig1		GO:0016788	SP:O01678_BOMMO	IEA		F	NOT_ASSIGNED		transcript	taxon:13686	20060515	Uniprot
Uniprot	SI.CL.9.cl.934.Contig1	SI.CL.9.cl.934.Contig1		GO:0008152	SP:O01678_BOMMO	IEA		P	NOT_ASSIGNED		transcript	taxon:13686	20060515	Uniprot
Uniprot	SI.CL.9.cl.934.Contig1	SI.CL.9.cl.934.Contig1		GO:0016491	SP:O01678_BOMMO	IEA		F	NOT_ASSIGNED		transcript	taxon:13686	20060515	Uniprot
Uniprot	SI.CL.9.cl.934.Contig1	SI.CL.9.cl.934.Contig1		GO:0006633	SP:O01678_BOMMO	IEA		P	NOT_ASSIGNED		transcript	taxon:13686	20060515	Uniprot
Uniprot	SI.CL.9.cl.934.Contig1	SI.CL.9.cl.934.Contig1		GO:0009058	SP:O01678_BOMMO	IEA		P	NOT_ASSIGNED		transcript	taxon:13686	20060515	Uniprot
Uniprot	SI.CL.9.cl.934.Contig1	SI.CL.9.cl.934.Contig1		GO:0003824	SP:O01678_BOMMO	IEA		F	NOT_ASSIGNED		transcript	taxon:13686	20060515	Uniprot
Uniprot	SI.CL.9.cl.934.Contig1	SI.CL.9.cl.934.Contig1		GO:0016740	SP:O01678_BOMMO	IEA		F	NOT_ASSIGNED		transcript	taxon:13686	20060515	Uniprot
Uniprot	SiJWD11BAI.scf	SiJWD11BAI.scf		GO:0008152	SP:Q4RV97_TETNG	IEA		P	NOT_ASSIGNED		transcript	taxon:13686	20060515	Uniprot
Uniprot	SiJWD11BAI.scf	SiJWD11BAI.scf		GO:0003824	SP:Q4RV97_TETNG	IEA		F	NOT_ASSIGNED		transcript	taxon:13686	20060515	Uniprot
Uniprot	SiJWC06ADI.scf	SiJWC06ADI.scf		GO:0004091	SP:ESTD_PIG	IEA		F	NOT_ASSIGNED		transcript	taxon:13686	20060515	Uniprot
Uniprot	SiJWC06ADI.scf	SiJWC06ADI.scf		GO:0000004	SP:ESTD_HUMAN	IEA		P	NOT_ASSIGNED		transcript	taxon:13686	20060515	Uniprot
Uniprot	SiJWC06ADI.scf	SiJWC06ADI.scf		GO:0016787	SP:ESTD_HUMAN	IEA		F	NOT_ASSIGNED		transcript	taxon:13686	20060515	Uniprot
Uniprot	SiJWC06ADI.scf	SiJWC06ADI.scf		GO:0003824	SP:Q5M8U4_XENTR	IEA		F	NOT_ASSIGNED		transcript	taxon:13686	20060515	Uniprot
Uniprot	SiJWC06ADI.scf	SiJWC06ADI.scf		GO:0016023	SP:ESTD_HUMAN	IEA		C	NOT_ASSIGNED		transcript	taxon:13686	20060515	Uniprot
Uniprot	SiJWC06ADI.scf	SiJWC06ADI.scf		GO:0004759	SP:ESTD_HUMAN	IEA		F	NOT_ASSIGNED		transcript	taxon:13686	20060515	Uniprot
Uniprot	SiJWD07AAR.scf	SiJWD07AAR.scf		GO:0000166	SP:Q5TS92_ANOGA	IEA		F	NOT_ASSIGNED		transcript	taxon:13686	20060515	Uniprot
Uniprot	SiJWD07AAR.scf	SiJWD07AAR.scf		GO:0005524	SP:Q2M196_DROPS	IEA		F	NOT_ASSIGNED		transcript	taxon:13686	20060515	Uniprot
Uniprot	SiJWD07AAR.scf	SiJWD07AAR.scf		GO:0006412	SP:Q2M196_DROPS	IEA		P	NOT_ASSIGNED		transcript	taxon:13686	20060515	Uniprot
Uniprot	SiJWD07AAR.scf	SiJWD07AAR.scf		GO:0006426	SP:Q2M196_DROPS	IEA		P	NOT_ASSIGNED		transcript	taxon:13686	20060515	Uniprot
Uniprot	SiJWD07AAR.scf	SiJWD07AAR.scf		GO:0004820	SP:Q2M196_DROPS	IEA		F	NOT_ASSIGNED		transcript	taxon:13686	20060515	Uniprot
Uniprot	SiJWD07AAR.scf	SiJWD07AAR.scf		GO:0004812	SP:Q2M196_DROPS	IEA		F	NOT_ASSIGNED		transcript	taxon:13686	20060515	Uniprot
Uniprot	SiJWD07AAR.scf	SiJWD07AAR.scf		GO:0016874	SP:Q4S534_TETNG	IEA		F	NOT_ASSIGNED		transcript	taxon:13686	20060515	Uniprot
Uniprot	SiJWD07AAR.scf	SiJWD07AAR.scf		GO:0006418	SP:Q2M196_DROPS	IEA		P	NOT_ASSIGNED		transcript	taxon:13686	20060515	Uniprot
Uniprot	SI.CL.18.cl.1864.Contig1	SI.CL.18.cl.1864.Contig1		GO:0005488	SP:Q2LZX0_DROPS	IEA		F	NOT_ASSIGNED		transcript	taxon:13686	20060515	Uniprot
Uniprot	SI.CL.18.cl.1864.Contig1	SI.CL.18.cl.1864.Contig1		GO:0005856	SP:PKHC1_HUMAN	IEA		C	NOT_ASSIGNED		transcript	taxon:13686	20060515	Uniprot
Uniprot	SI.CL.18.cl.1864.Contig1	SI.CL.18.cl.1864.Contig1		GO:0030036	SP:PKHC1_HUMAN	IEA		P	NOT_ASSIGNED		transcript	taxon:13686	20060515	Uniprot
Uniprot	SI.CL.18.cl.1864.Contig1	SI.CL.18.cl.1864.Contig1		GO:0008360	SP:PKHC1_HUMAN	IEA		P	NOT_ASSIGNED		transcript	taxon:13686	20060515	Uniprot
Uniprot	SI.CL.18.cl.1864.Contig1	SI.CL.18.cl.1864.Contig1		GO:0001725	SP:PKHC1_HUMAN	IEA		C	NOT_ASSIGNED		transcript	taxon:13686	20060515	Uniprot
Uniprot	SI.CL.18.cl.1864.Contig1	SI.CL.18.cl.1864.Contig1		GO:0005515	SP:PKHC1_HUMAN	IEA		F	NOT_ASSIGNED		transcript	taxon:13686	20060515	Uniprot
Uniprot	SI.CL.18.cl.1864.Contig1	SI.CL.18.cl.1864.Contig1		GO:0007155	SP:PKHC1_HUMAN	IEA		P	NOT_ASSIGNED		transcript	taxon:13686	20060515	Uniprot
Uniprot	SI.CL.22.cl.2296.Contig1	SI.CL.22.cl.2296.Contig1		GO:0005854	SP:NACA_HUMAN	IEA		C	NOT_ASSIGNED		transcript	taxon:13686	20060515	Uniprot
Uniprot	SI.CL.22.cl.2296.Contig1	SI.CL.22.cl.2296.Contig1		GO:0005634	SP:NACA_BOVIN	IEA		C	NOT_ASSIGNED		transcript	taxon:13686	20060515	Uniprot
Uniprot	SI.CL.22.cl.2296.Contig1	SI.CL.22.cl.2296.Contig1		GO:0006350	SP:NACA_BOVIN	IEA		P	NOT_ASSIGNED		transcript	taxon:13686	20060515	Uniprot
Uniprot	SI.CL.22.cl.2296.Contig1	SI.CL.22.cl.2296.Contig1		GO:0003677	SP:NACA_BOVIN	IEA		F	NOT_ASSIGNED		transcript	taxon:13686	20060515	Uniprot
Uniprot	SI.CL.22.cl.2296.Contig1	SI.CL.22.cl.2296.Contig1		GO:0006412	SP:NACA_HUMAN	IEA		P	NOT_ASSIGNED		transcript	taxon:13686	20060515	Uniprot
Uniprot	SI.CL.22.cl.2296.Contig1	SI.CL.22.cl.2296.Contig1		GO:0015031	SP:NACA_BOVIN	IEA		P	NOT_ASSIGNED		transcript	taxon:13686	20060515	Uniprot
Uniprot	SI.CL.22.cl.2296.Contig1	SI.CL.22.cl.2296.Contig1		GO:0006810	SP:NACA_PONPY	IEA		P	NOT_ASSIGNED		transcript	taxon:13686	20060515	Uniprot
Uniprot	SiJWH03BDQ.scf	SiJWH03BDQ.scf		GO:0005524	SP:Q58DD9_BOVIN	IEA		F	NOT_ASSIGNED		transcript	taxon:13686	20060515	Uniprot
Uniprot	SiJWH03BDQ.scf	SiJWH03BDQ.scf		GO:0005554	SP:Q58DD9_BOVIN	IEA		F	NOT_ASSIGNED		transcript	taxon:13686	20060515	Uniprot
Uniprot	SiJWH07AAY.scf	SiJWH07AAY.scf		GO:0005509	SP:TXD10_HUMAN	IEA		F	NOT_ASSIGNED		transcript	taxon:13686	20060515	Uniprot
Uniprot	SiJWH07AAY.scf	SiJWH07AAY.scf		GO:0005783	SP:TXD10_HUMAN	IEA		C	NOT_ASSIGNED		transcript	taxon:13686	20060515	Uniprot
Uniprot	SiJWH07AAY.scf	SiJWH07AAY.scf		GO:0016020	SP:TXD10_HUMAN	IEA		C	NOT_ASSIGNED		transcript	taxon:13686	20060515	Uniprot
Uniprot	SiJWH07AAY.scf	SiJWH07AAY.scf		GO:0016853	SP:TXD10_HUMAN	IEA		F	NOT_ASSIGNED		transcript	taxon:13686	20060515	Uniprot
Uniprot	SiJWH07AAY.scf	SiJWH07AAY.scf		GO:0016021	SP:TXD10_HUMAN	IEA		C	NOT_ASSIGNED		transcript	taxon:13686	20060515	Uniprot
Uniprot	SiJWH07AAY.scf	SiJWH07AAY.scf		GO:0006118	SP:TXD10_HUMAN	IEA		P	NOT_ASSIGNED		transcript	taxon:13686	20060515	Uniprot
Uniprot	SiJWH07AAY.scf	SiJWH07AAY.scf		GO:0003756	SP:TXD10_HUMAN	IEA		F	NOT_ASSIGNED		transcript	taxon:13686	20060515	Uniprot
Uniprot	SiJWG08BAX.scf	SiJWG08BAX.scf		GO:0008152	SP:DHR11_BOVIN	IEA		P	NOT_ASSIGNED		transcript	taxon:13686	20060515	Uniprot
Uniprot	SiJWG08BAX.scf	SiJWG08BAX.scf		GO:0016491	SP:DHR11_BOVIN	IEA		F	NOT_ASSIGNED		transcript	taxon:13686	20060515	Uniprot
Uniprot	SiJWD12AAZ.scf	SiJWD12AAZ.scf		GO:0007283	SP:ALR_HUMAN	IEA		P	NOT_ASSIGNED		transcript	taxon:13686	20060515	Uniprot
Uniprot	SiJWD12AAZ.scf	SiJWD12AAZ.scf		GO:0008283	SP:ALR_HUMAN	IEA		P	NOT_ASSIGNED		transcript	taxon:13686	20060515	Uniprot
Uniprot	SiJWD12AAZ.scf	SiJWD12AAZ.scf		GO:0008372	SP:ALR_HUMAN	IEA		C	NOT_ASSIGNED		transcript	taxon:13686	20060515	Uniprot
Uniprot	SiJWD12AAZ.scf	SiJWD12AAZ.scf		GO:0005515	SP:ALR_HUMAN	IEA		F	NOT_ASSIGNED		transcript	taxon:13686	20060515	Uniprot
Uniprot	SI.CL.16.cl.1623.Contig1	SI.CL.16.cl.1623.Contig1		GO:0006412	SP:Q4GX72_AGRLI	IEA		P	NOT_ASSIGNED		transcript	taxon:13686	20060515	Uniprot
Uniprot	SI.CL.16.cl.1623.Contig1	SI.CL.16.cl.1623.Contig1		GO:0005840	SP:Q4GX72_AGRLI	IEA		C	NOT_ASSIGNED		transcript	taxon:13686	20060515	Uniprot
Uniprot	SI.CL.16.cl.1623.Contig1	SI.CL.16.cl.1623.Contig1		GO:0030529	SP:Q4GX72_AGRLI	IEA		C	NOT_ASSIGNED		transcript	taxon:13686	20060515	Uniprot
Uniprot	SI.CL.16.cl.1623.Contig1	SI.CL.16.cl.1623.Contig1		GO:0003735	SP:Q4GX72_AGRLI	IEA		F	NOT_ASSIGNED		transcript	taxon:13686	20060515	Uniprot
Uniprot	SI.CL.16.cl.1623.Contig1	SI.CL.16.cl.1623.Contig1		GO:0005622	SP:Q4GX72_AGRLI	IEA		C	NOT_ASSIGNED		transcript	taxon:13686	20060515	Uniprot
Uniprot	SI.CL.42.cl.4282.Contig1	SI.CL.42.cl.4282.Contig1		GO:0008152	SP:LIPS_HUMAN	IEA		P	NOT_ASSIGNED		transcript	taxon:13686	20060515	Uniprot
Uniprot	SI.CL.42.cl.4282.Contig1	SI.CL.42.cl.4282.Contig1		GO:0016298	SP:LIPS_HUMAN	IEA		F	NOT_ASSIGNED		transcript	taxon:13686	20060515	Uniprot
Uniprot	SI.CL.42.cl.4282.Contig1	SI.CL.42.cl.4282.Contig1		GO:0006631	SP:LIPS_HUMAN	IEA		P	NOT_ASSIGNED		transcript	taxon:13686	20060515	Uniprot
Uniprot	SI.CL.42.cl.4282.Contig1	SI.CL.42.cl.4282.Contig1		GO:0016787	SP:LIPS_HUMAN	IEA		F	NOT_ASSIGNED		transcript	taxon:13686	20060515	Uniprot
Uniprot	SI.CL.42.cl.4282.Contig1	SI.CL.42.cl.4282.Contig1		GO:0006091	SP:LIPS_HUMAN	IEA		P	NOT_ASSIGNED		transcript	taxon:13686	20060515	Uniprot
Uniprot	SI.CL.42.cl.4282.Contig1	SI.CL.42.cl.4282.Contig1		GO:0016042	SP:LIPS_HUMAN	IEA		P	NOT_ASSIGNED		transcript	taxon:13686	20060515	Uniprot
Uniprot	SI.CL.42.cl.4282.Contig1	SI.CL.42.cl.4282.Contig1		GO:0006468	SP:LIPS_HUMAN	IEA		P	NOT_ASSIGNED		transcript	taxon:13686	20060515	Uniprot
Uniprot	SI.CL.42.cl.4282.Contig1	SI.CL.42.cl.4282.Contig1		GO:0008202	SP:LIPS_HUMAN	IEA		P	NOT_ASSIGNED		transcript	taxon:13686	20060515	Uniprot
Uniprot	SI.CL.42.cl.4282.Contig1	SI.CL.42.cl.4282.Contig1		GO:0003824	SP:Q4SMU0_TETNG	IEA		F	NOT_ASSIGNED		transcript	taxon:13686	20060515	Uniprot
Uniprot	SI.CL.42.cl.4282.Contig1	SI.CL.42.cl.4282.Contig1		GO:0008203	SP:LIPS_HUMAN	IEA		P	NOT_ASSIGNED		transcript	taxon:13686	20060515	Uniprot
Uniprot	SI.CL.42.cl.4282.Contig1	SI.CL.42.cl.4282.Contig1		GO:0006629	SP:Q4SMU0_TETNG	IEA		P	NOT_ASSIGNED		transcript	taxon:13686	20060515	Uniprot
Uniprot	SiJWC04AAC2.scf	SiJWC04AAC2.scf		GO:0003677	SP:Q6L408_SOLDE	IEA		F	NOT_ASSIGNED		transcript	taxon:13686	20060515	Uniprot
Uniprot	SiJWC04AAC2.scf	SiJWC04AAC2.scf		GO:0003676	SP:Q5NRP0_SOLDE	IEA		F	NOT_ASSIGNED		transcript	taxon:13686	20060515	Uniprot
Uniprot	SiJWC04AAC2.scf	SiJWC04AAC2.scf		GO:0008270	SP:Q5NRP0_SOLDE	IEA		F	NOT_ASSIGNED		transcript	taxon:13686	20060515	Uniprot
Uniprot	SiJWC04AAC2.scf	SiJWC04AAC2.scf		GO:0015074	SP:Q6L408_SOLDE	IEA		P	NOT_ASSIGNED		transcript	taxon:13686	20060515	Uniprot
Uniprot	SI.CL.4.cl.430.Contig3	SI.CL.4.cl.430.Contig3		GO:0004866	SP:IXCI_BOOMI	IEA		F	NOT_ASSIGNED		transcript	taxon:13686	20060515	Uniprot
Uniprot	SI.CL.4.cl.430.Contig3	SI.CL.4.cl.430.Contig3		GO:0004867	SP:IXCI_BOOMI	IEA		F	NOT_ASSIGNED		transcript	taxon:13686	20060515	Uniprot
Uniprot	SI.CL.4.cl.430.Contig3	SI.CL.4.cl.430.Contig3		GO:0042742	SP:IXCI_BOOMI	IEA		P	NOT_ASSIGNED		transcript	taxon:13686	20060515	Uniprot
Uniprot	SI.CL.24.cl.2464.Contig1	SI.CL.24.cl.2464.Contig1		GO:0016829	SP:Q9NVN1_HUMAN	IEA		F	NOT_ASSIGNED		transcript	taxon:13686	20060515	Uniprot
Uniprot	SI.CL.24.cl.2464.Contig1	SI.CL.24.cl.2464.Contig1		GO:0004462	SP:Q9NVN1_HUMAN	IEA		F	NOT_ASSIGNED		transcript	taxon:13686	20060515	Uniprot
Uniprot	SI.CL.32.cl.3223.Contig1	SI.CL.32.cl.3223.Contig1		GO:0005634	SP:Q4T8U7_TETNG	IEA		C	NOT_ASSIGNED		transcript	taxon:13686	20060515	Uniprot
Uniprot	SI.CL.32.cl.3223.Contig1	SI.CL.32.cl.3223.Contig1		GO:0005488	SP:Q4T8U7_TETNG	IEA		F	NOT_ASSIGNED		transcript	taxon:13686	20060515	Uniprot
Uniprot	SI.CL.32.cl.3223.Contig1	SI.CL.32.cl.3223.Contig1		GO:0006397	SP:XPO1_HUMAN	IEA		P	NOT_ASSIGNED		transcript	taxon:13686	20060515	Uniprot
Uniprot	SI.CL.32.cl.3223.Contig1	SI.CL.32.cl.3223.Contig1		GO:0000059	SP:XPO1_HUMAN	IEA		P	NOT_ASSIGNED		transcript	taxon:13686	20060515	Uniprot
Uniprot	SI.CL.32.cl.3223.Contig1	SI.CL.32.cl.3223.Contig1		GO:0008565	SP:XPO1_HUMAN	IEA		F	NOT_ASSIGNED		transcript	taxon:13686	20060515	Uniprot
Uniprot	SI.CL.32.cl.3223.Contig1	SI.CL.32.cl.3223.Contig1		GO:0015031	SP:XPO1_HUMAN	IEA		P	NOT_ASSIGNED		transcript	taxon:13686	20060515	Uniprot
Uniprot	SI.CL.32.cl.3223.Contig1	SI.CL.32.cl.3223.Contig1		GO:0005654	SP:XPO1_HUMAN	IEA		C	NOT_ASSIGNED		transcript	taxon:13686	20060515	Uniprot
Uniprot	SI.CL.32.cl.3223.Contig1	SI.CL.32.cl.3223.Contig1		GO:0003723	SP:XPO1_HUMAN	IEA		F	NOT_ASSIGNED		transcript	taxon:13686	20060515	Uniprot
Uniprot	SI.CL.32.cl.3223.Contig1	SI.CL.32.cl.3223.Contig1		GO:0005515	SP:XPO1_HUMAN	IEA		F	NOT_ASSIGNED		transcript	taxon:13686	20060515	Uniprot
Uniprot	SI.CL.32.cl.3223.Contig1	SI.CL.32.cl.3223.Contig1		GO:0005737	SP:XPO1_HUMAN	IEA		C	NOT_ASSIGNED		transcript	taxon:13686	20060515	Uniprot
Uniprot	SI.CL.32.cl.3223.Contig1	SI.CL.32.cl.3223.Contig1		GO:0005643	SP:XPO1_HUMAN	IEA		C	NOT_ASSIGNED		transcript	taxon:13686	20060515	Uniprot
Uniprot	SI.CL.32.cl.3223.Contig1	SI.CL.32.cl.3223.Contig1		GO:0006406	SP:XPO1_HUMAN	IEA		P	NOT_ASSIGNED		transcript	taxon:13686	20060515	Uniprot
Uniprot	SiJWE01AAB.scf	SiJWE01AAB.scf		GO:0005634	SP:Q5B9V9_EMENI	IEA		C	NOT_ASSIGNED		transcript	taxon:13686	20060515	Uniprot
Uniprot	SiJWE01AAB.scf	SiJWE01AAB.scf		GO:0003964	SP:Q5B9V9_EMENI	IEA		F	NOT_ASSIGNED		transcript	taxon:13686	20060515	Uniprot
Uniprot	SiJWE01AAB.scf	SiJWE01AAB.scf		GO:0003676	SP:Q5TVX8_ANOGA	IEA		F	NOT_ASSIGNED		transcript	taxon:13686	20060515	Uniprot
Uniprot	SiJWE01AAB.scf	SiJWE01AAB.scf		GO:0000785	SP:Q5B9V9_EMENI	IEA		C	NOT_ASSIGNED		transcript	taxon:13686	20060515	Uniprot
Uniprot	SiJWE01AAB.scf	SiJWE01AAB.scf		GO:0008233	SP:Q5TVX8_ANOGA	IEA		F	NOT_ASSIGNED		transcript	taxon:13686	20060515	Uniprot
Uniprot	SiJWE01AAB.scf	SiJWE01AAB.scf		GO:0006333	SP:Q5B9V9_EMENI	IEA		P	NOT_ASSIGNED		transcript	taxon:13686	20060515	Uniprot
Uniprot	SiJWE01AAB.scf	SiJWE01AAB.scf		GO:0003723	SP:Q5B9V9_EMENI	IEA		F	NOT_ASSIGNED		transcript	taxon:13686	20060515	Uniprot
Uniprot	SiJWE01AAB.scf	SiJWE01AAB.scf		GO:0003682	SP:Q5B9V9_EMENI	IEA		F	NOT_ASSIGNED		transcript	taxon:13686	20060515	Uniprot
Uniprot	SiJWE01AAB.scf	SiJWE01AAB.scf		GO:0003677	SP:Q5B9V9_EMENI	IEA		F	NOT_ASSIGNED		transcript	taxon:13686	20060515	Uniprot
Uniprot	SiJWE01AAB.scf	SiJWE01AAB.scf		GO:0008270	SP:Q5TVX8_ANOGA	IEA		F	NOT_ASSIGNED		transcript	taxon:13686	20060515	Uniprot
Uniprot	SiJWE01AAB.scf	SiJWE01AAB.scf		GO:0006508	SP:Q5TVX8_ANOGA	IEA		P	NOT_ASSIGNED		transcript	taxon:13686	20060515	Uniprot
Uniprot	SiJWE01AAB.scf	SiJWE01AAB.scf		GO:0006278	SP:Q5B9V9_EMENI	IEA		P	NOT_ASSIGNED		transcript	taxon:13686	20060515	Uniprot
Uniprot	SiJWE01AAB.scf	SiJWE01AAB.scf		GO:0004190	SP:Q5TVX8_ANOGA	IEA		F	NOT_ASSIGNED		transcript	taxon:13686	20060515	Uniprot
Uniprot	SiJWE01AAB.scf	SiJWE01AAB.scf		GO:0015074	SP:Q5B9V9_EMENI	IEA		P	NOT_ASSIGNED		transcript	taxon:13686	20060515	Uniprot
Uniprot	SI.CL.40.cl.4039.Contig1	SI.CL.40.cl.4039.Contig1		GO:0008565	SP:STX5_HUMAN	IEA		F	NOT_ASSIGNED		transcript	taxon:13686	20060515	Uniprot
Uniprot	SI.CL.40.cl.4039.Contig1	SI.CL.40.cl.4039.Contig1		GO:0016020	SP:STX5_HUMAN	IEA		C	NOT_ASSIGNED		transcript	taxon:13686	20060515	Uniprot
Uniprot	SI.CL.40.cl.4039.Contig1	SI.CL.40.cl.4039.Contig1		GO:0006903	SP:STX5_HUMAN	IEA		P	NOT_ASSIGNED		transcript	taxon:13686	20060515	Uniprot
Uniprot	SI.CL.40.cl.4039.Contig1	SI.CL.40.cl.4039.Contig1		GO:0005795	SP:STX5_HUMAN	IEA		C	NOT_ASSIGNED		transcript	taxon:13686	20060515	Uniprot
Uniprot	SI.CL.40.cl.4039.Contig1	SI.CL.40.cl.4039.Contig1		GO:0016021	SP:STX5_HUMAN	IEA		C	NOT_ASSIGNED		transcript	taxon:13686	20060515	Uniprot
Uniprot	SI.CL.40.cl.4039.Contig1	SI.CL.40.cl.4039.Contig1		GO:0006886	SP:STX5_HUMAN	IEA		P	NOT_ASSIGNED		transcript	taxon:13686	20060515	Uniprot
Uniprot	SI.CL.40.cl.4039.Contig1	SI.CL.40.cl.4039.Contig1		GO:0006810	SP:STX5_HUMAN	IEA		P	NOT_ASSIGNED		transcript	taxon:13686	20060515	Uniprot
Uniprot	SI.CL.14.cl.1445.Contig1	SI.CL.14.cl.1445.Contig1		GO:0003774	SP:Q7PJV1_ANOGA	IEA		F	NOT_ASSIGNED		transcript	taxon:13686	20060515	Uniprot
Uniprot	SI.CL.14.cl.1445.Contig1	SI.CL.14.cl.1445.Contig1		GO:0005524	SP:Q7PJV1_ANOGA	IEA		F	NOT_ASSIGNED		transcript	taxon:13686	20060515	Uniprot
Uniprot	SI.CL.14.cl.1445.Contig1	SI.CL.14.cl.1445.Contig1		GO:0016459	SP:Q7PJV1_ANOGA	IEA		C	NOT_ASSIGNED		transcript	taxon:13686	20060515	Uniprot
Uniprot	SI.CL.6.cl.610.Contig1	SI.CL.6.cl.610.Contig1		GO:0004386	SP:O12662_9COMO	IEA		F	NOT_ASSIGNED		transcript	taxon:13686	20060515	Uniprot
Uniprot	SI.CL.6.cl.610.Contig1	SI.CL.6.cl.610.Contig1		GO:0000166	SP:POL1_TORVR	IEA		F	NOT_ASSIGNED		transcript	taxon:13686	20060515	Uniprot
Uniprot	SI.CL.6.cl.610.Contig1	SI.CL.6.cl.610.Contig1		GO:0004197	SP:POL1_TORVR	IEA		F	NOT_ASSIGNED		transcript	taxon:13686	20060515	Uniprot
Uniprot	SI.CL.6.cl.610.Contig1	SI.CL.6.cl.610.Contig1		GO:0016787	SP:POL1_TORVR	IEA		F	NOT_ASSIGNED		transcript	taxon:13686	20060515	Uniprot
Uniprot	SI.CL.6.cl.610.Contig1	SI.CL.6.cl.610.Contig1		GO:0019028	SP:Q52QU5_9PICO	IEA		C	NOT_ASSIGNED		transcript	taxon:13686	20060515	Uniprot
Uniprot	SI.CL.6.cl.610.Contig1	SI.CL.6.cl.610.Contig1		GO:0016740	SP:POL1_TORVR	IEA		F	NOT_ASSIGNED		transcript	taxon:13686	20060515	Uniprot
Uniprot	SI.CL.6.cl.610.Contig1	SI.CL.6.cl.610.Contig1		GO:0003968	SP:O12662_9COMO	IEA		F	NOT_ASSIGNED		transcript	taxon:13686	20060515	Uniprot
Uniprot	SI.CL.6.cl.610.Contig1	SI.CL.6.cl.610.Contig1		GO:0018144	SP:POL1_TORVR	IEA		P	NOT_ASSIGNED		transcript	taxon:13686	20060515	Uniprot
Uniprot	SI.CL.6.cl.610.Contig1	SI.CL.6.cl.610.Contig1		GO:0016020	SP:POL1_TORVR	IEA		C	NOT_ASSIGNED		transcript	taxon:13686	20060515	Uniprot
Uniprot	SI.CL.6.cl.610.Contig1	SI.CL.6.cl.610.Contig1		GO:0016779	SP:POL1_TORVR	IEA		F	NOT_ASSIGNED		transcript	taxon:13686	20060515	Uniprot
Uniprot	SI.CL.6.cl.610.Contig1	SI.CL.6.cl.610.Contig1		GO:0008233	SP:POL1_TORVR	IEA		F	NOT_ASSIGNED		transcript	taxon:13686	20060515	Uniprot
Uniprot	SI.CL.6.cl.610.Contig1	SI.CL.6.cl.610.Contig1		GO:0016021	SP:POL1_TORVR	IEA		C	NOT_ASSIGNED		transcript	taxon:13686	20060515	Uniprot
Uniprot	SI.CL.6.cl.610.Contig1	SI.CL.6.cl.610.Contig1		GO:0019079	SP:O12662_9COMO	IEA		P	NOT_ASSIGNED		transcript	taxon:13686	20060515	Uniprot
Uniprot	SI.CL.6.cl.610.Contig1	SI.CL.6.cl.610.Contig1		GO:0005198	SP:Q52QU5_9PICO	IEA		F	NOT_ASSIGNED		transcript	taxon:13686	20060515	Uniprot
Uniprot	SI.CL.6.cl.610.Contig1	SI.CL.6.cl.610.Contig1		GO:0003723	SP:O12662_9COMO	IEA		F	NOT_ASSIGNED		transcript	taxon:13686	20060515	Uniprot
Uniprot	SI.CL.6.cl.610.Contig1	SI.CL.6.cl.610.Contig1		GO:0006350	SP:O12662_9COMO	IEA		P	NOT_ASSIGNED		transcript	taxon:13686	20060515	Uniprot
Uniprot	SI.CL.6.cl.610.Contig1	SI.CL.6.cl.610.Contig1		GO:0005524	SP:O12662_9COMO	IEA		F	NOT_ASSIGNED		transcript	taxon:13686	20060515	Uniprot
Uniprot	SI.CL.6.cl.610.Contig1	SI.CL.6.cl.610.Contig1		GO:0003724	SP:POL1_TORVR	IEA		F	NOT_ASSIGNED		transcript	taxon:13686	20060515	Uniprot
Uniprot	SI.CL.6.cl.610.Contig1	SI.CL.6.cl.610.Contig1		GO:0006508	SP:POL1_TORVR	IEA		P	NOT_ASSIGNED		transcript	taxon:13686	20060515	Uniprot
Uniprot	SI.CL.6.cl.610.Contig1	SI.CL.6.cl.610.Contig1		GO:0008234	SP:POL1_TORVR	IEA		F	NOT_ASSIGNED		transcript	taxon:13686	20060515	Uniprot
Uniprot	SI.CL.36.cl.3676.Contig1	SI.CL.36.cl.3676.Contig1		GO:0006092	SP:Q3SYV2_BOVIN	IEA		P	NOT_ASSIGNED		transcript	taxon:13686	20060515	Uniprot
Uniprot	SI.CL.36.cl.3676.Contig1	SI.CL.36.cl.3676.Contig1		GO:0004450	SP:Q3SYV2_BOVIN	IEA		F	NOT_ASSIGNED		transcript	taxon:13686	20060515	Uniprot
Uniprot	SI.CL.36.cl.3676.Contig1	SI.CL.36.cl.3676.Contig1		GO:0008152	SP:Q3SYV2_BOVIN	IEA		P	NOT_ASSIGNED		transcript	taxon:13686	20060515	Uniprot
Uniprot	SI.CL.36.cl.3676.Contig1	SI.CL.36.cl.3676.Contig1		GO:0016491	SP:Q3SYV2_BOVIN	IEA		F	NOT_ASSIGNED		transcript	taxon:13686	20060515	Uniprot
Uniprot	SI.CL.18.cl.1870.Contig1	SI.CL.18.cl.1870.Contig1		GO:0004437	SP:Q6NVY7_HUMAN	IEA		F	NOT_ASSIGNED		transcript	taxon:13686	20060515	Uniprot
Uniprot	SI.CL.16.cl.1649.Contig1	SI.CL.16.cl.1649.Contig1		GO:0016020	SP:Q5ZLI8_CHICK	IEA		C	NOT_ASSIGNED		transcript	taxon:13686	20060515	Uniprot
Uniprot	SI.CL.16.cl.1649.Contig1	SI.CL.16.cl.1649.Contig1		GO:0007155	SP:Q5ZLI8_CHICK	IEA		P	NOT_ASSIGNED		transcript	taxon:13686	20060515	Uniprot
Uniprot	SiJWE08AAH.scf	SiJWE08AAH.scf		GO:0000287	SP:RIFK_HUMAN	IEA		F	NOT_ASSIGNED		transcript	taxon:13686	20060515	Uniprot
Uniprot	SiJWE08AAH.scf	SiJWE08AAH.scf		GO:0000166	SP:RIFK_HUMAN	IEA		F	NOT_ASSIGNED		transcript	taxon:13686	20060515	Uniprot
Uniprot	SiJWE08AAH.scf	SiJWE08AAH.scf		GO:0005524	SP:RIFK_HUMAN	IEA		F	NOT_ASSIGNED		transcript	taxon:13686	20060515	Uniprot
Uniprot	SiJWE08AAH.scf	SiJWE08AAH.scf		GO:0008270	SP:RIFK_HUMAN	IEA		F	NOT_ASSIGNED		transcript	taxon:13686	20060515	Uniprot
Uniprot	SiJWE08AAH.scf	SiJWE08AAH.scf		GO:0005737	SP:RIFK_HUMAN	IEA		C	NOT_ASSIGNED		transcript	taxon:13686	20060515	Uniprot
Uniprot	SiJWE08AAH.scf	SiJWE08AAH.scf		GO:0008531	SP:Q3SZP4_BOVIN	IEA		F	NOT_ASSIGNED		transcript	taxon:13686	20060515	Uniprot
Uniprot	SiJWE08AAH.scf	SiJWE08AAH.scf		GO:0009231	SP:Q3SZP4_BOVIN	IEA		P	NOT_ASSIGNED		transcript	taxon:13686	20060515	Uniprot
Uniprot	SiJWE08AAH.scf	SiJWE08AAH.scf		GO:0016740	SP:RIFK_HUMAN	IEA		F	NOT_ASSIGNED		transcript	taxon:13686	20060515	Uniprot
Uniprot	SiJWC03ADO.scf	SiJWC03ADO.scf		GO:0005634	SP:PELO_HUMAN	IEA		C	NOT_ASSIGNED		transcript	taxon:13686	20060515	Uniprot
Uniprot	SiJWC03ADO.scf	SiJWC03ADO.scf		GO:0006412	SP:PELO_HUMAN	IEA		P	NOT_ASSIGNED		transcript	taxon:13686	20060515	Uniprot
Uniprot	SiJWG11ADB.scf	SiJWG11ADB.scf		GO:0005634	SP:PTDSR_CHICK	IEA		C	NOT_ASSIGNED		transcript	taxon:13686	20060515	Uniprot
Uniprot	SiJWG11ADB.scf	SiJWG11ADB.scf		GO:0007275	SP:PTDSR_PONPY	IEA		P	NOT_ASSIGNED		transcript	taxon:13686	20060515	Uniprot
Uniprot	SiJWG11ADB.scf	SiJWG11ADB.scf		GO:0030154	SP:PTDSR_CHICK	IEA		P	NOT_ASSIGNED		transcript	taxon:13686	20060515	Uniprot
Uniprot	SI.CL.14.cl.1460.Contig1	SI.CL.14.cl.1460.Contig1		GO:0006118	SP:TXNL5_HUMAN	IEA		P	NOT_ASSIGNED		transcript	taxon:13686	20060515	Uniprot
Uniprot	SiJWC08ADA.scf	SiJWC08ADA.scf		GO:0005506	SP:Q309A5_APIME	IEA		F	NOT_ASSIGNED		transcript	taxon:13686	20060515	Uniprot
Uniprot	SiJWC08ADA.scf	SiJWC08ADA.scf		GO:0004497	SP:Q309A5_APIME	IEA		F	NOT_ASSIGNED		transcript	taxon:13686	20060515	Uniprot
Uniprot	SiJWC08ADA.scf	SiJWC08ADA.scf		GO:0020037	SP:Q309A5_APIME	IEA		F	NOT_ASSIGNED		transcript	taxon:13686	20060515	Uniprot
Uniprot	SiJWC08ADA.scf	SiJWC08ADA.scf		GO:0006118	SP:Q309A5_APIME	IEA		P	NOT_ASSIGNED		transcript	taxon:13686	20060515	Uniprot
Uniprot	SiJWE03BDP.scf	SiJWE03BDP.scf		GO:0005506	SP:O61916_ORNMO	IEA		F	NOT_ASSIGNED		transcript	taxon:13686	20060515	Uniprot
Uniprot	SiJWE03BDP.scf	SiJWE03BDP.scf		GO:0008199	SP:O61916_ORNMO	IEA		F	NOT_ASSIGNED		transcript	taxon:13686	20060515	Uniprot
Uniprot	SiJWE03BDP.scf	SiJWE03BDP.scf		GO:0005488	SP:O61916_ORNMO	IEA		F	NOT_ASSIGNED		transcript	taxon:13686	20060515	Uniprot
Uniprot	SiJWE03BDP.scf	SiJWE03BDP.scf		GO:0046872	SP:O61916_ORNMO	IEA		F	NOT_ASSIGNED		transcript	taxon:13686	20060515	Uniprot
Uniprot	SiJWE03BDP.scf	SiJWE03BDP.scf		GO:0006879	SP:O61916_ORNMO	IEA		P	NOT_ASSIGNED		transcript	taxon:13686	20060515	Uniprot
Uniprot	SiJWE03BDP.scf	SiJWE03BDP.scf		GO:0006826	SP:O61916_ORNMO	IEA		P	NOT_ASSIGNED		transcript	taxon:13686	20060515	Uniprot
Uniprot	SiJWE07ABY.scf	SiJWE07ABY.scf		GO:0000166	SP:Q3T0K2_BOVIN	IEA		F	NOT_ASSIGNED		transcript	taxon:13686	20060515	Uniprot
Uniprot	SiJWE07ABY.scf	SiJWE07ABY.scf		GO:0005856	SP:TCPG_HUMAN	IEA		C	NOT_ASSIGNED		transcript	taxon:13686	20060515	Uniprot
Uniprot	SiJWE07ABY.scf	SiJWE07ABY.scf		GO:0005524	SP:Q3T0K2_BOVIN	IEA		F	NOT_ASSIGNED		transcript	taxon:13686	20060515	Uniprot
Uniprot	SiJWE07ABY.scf	SiJWE07ABY.scf		GO:0005515	SP:TCPG_XENLA	IEA		F	NOT_ASSIGNED		transcript	taxon:13686	20060515	Uniprot
Uniprot	SiJWE07ABY.scf	SiJWE07ABY.scf		GO:0006457	SP:Q3T0K2_BOVIN	IEA		P	NOT_ASSIGNED		transcript	taxon:13686	20060515	Uniprot
Uniprot	SiJWE07ABY.scf	SiJWE07ABY.scf		GO:0044267	SP:TCPG_XENLA	IEA		P	NOT_ASSIGNED		transcript	taxon:13686	20060515	Uniprot
Uniprot	SiJWE07ABY.scf	SiJWE07ABY.scf		GO:0051082	SP:Q3T0K2_BOVIN	IEA		F	NOT_ASSIGNED		transcript	taxon:13686	20060515	Uniprot
Uniprot	SI.CL.10.cl.1096.Contig1	SI.CL.10.cl.1096.Contig1		GO:0007601	SP:PPT1_HUMAN	IEA		P	NOT_ASSIGNED		transcript	taxon:13686	20060515	Uniprot
Uniprot	SI.CL.10.cl.1096.Contig1	SI.CL.10.cl.1096.Contig1		GO:0007399	SP:PPT1_HUMAN	IEA		P	NOT_ASSIGNED		transcript	taxon:13686	20060515	Uniprot
Uniprot	SI.CL.10.cl.1096.Contig1	SI.CL.10.cl.1096.Contig1		GO:0005764	SP:Q5ZJT3_CHICK	IEA		C	NOT_ASSIGNED		transcript	taxon:13686	20060515	Uniprot
Uniprot	SI.CL.10.cl.1096.Contig1	SI.CL.10.cl.1096.Contig1		GO:0016787	SP:Q5ZJT3_CHICK	IEA		F	NOT_ASSIGNED		transcript	taxon:13686	20060515	Uniprot
Uniprot	SI.CL.10.cl.1096.Contig1	SI.CL.10.cl.1096.Contig1		GO:0006464	SP:Q5ZJT3_CHICK	IEA		P	NOT_ASSIGNED		transcript	taxon:13686	20060515	Uniprot
Uniprot	SI.CL.10.cl.1096.Contig1	SI.CL.10.cl.1096.Contig1		GO:0003824	SP:Q4R5A6_MACFA	IEA		F	NOT_ASSIGNED		transcript	taxon:13686	20060515	Uniprot
Uniprot	SI.CL.10.cl.1096.Contig1	SI.CL.10.cl.1096.Contig1		GO:0050896	SP:PPT1_HUMAN	IEA		P	NOT_ASSIGNED		transcript	taxon:13686	20060515	Uniprot
Uniprot	SI.CL.10.cl.1096.Contig1	SI.CL.10.cl.1096.Contig1		GO:0008474	SP:Q5ZJT3_CHICK	IEA		F	NOT_ASSIGNED		transcript	taxon:13686	20060515	Uniprot
Uniprot	SiJWA10ABC.scf	SiJWA10ABC.scf		GO:0016068	SP:VA2_SOLIN	IEA		P	NOT_ASSIGNED		transcript	taxon:13686	20060515	Uniprot
Uniprot	SiJWA10ABC.scf	SiJWA10ABC.scf		GO:0005549	SP:VA2_SOLRI	IEA		F	NOT_ASSIGNED		transcript	taxon:13686	20060515	Uniprot
Uniprot	SiJWA10ABC.scf	SiJWA10ABC.scf		GO:0006810	SP:VA2_SOLRI	IEA		P	NOT_ASSIGNED		transcript	taxon:13686	20060515	Uniprot
Uniprot	SI.CL.40.cl.4085.SiJWH11BAUR1E04.scf	SI.CL.40.cl.4085.SiJWH11BAUR1E04.scf		GO:0006979	SP:Q8I9W0_APILI	IEA		P	NOT_ASSIGNED		transcript	taxon:13686	20060515	Uniprot
Uniprot	SI.CL.40.cl.4085.SiJWH11BAUR1E04.scf	SI.CL.40.cl.4085.SiJWH11BAUR1E04.scf		GO:0046872	SP:Q8I9W0_APILI	IEA		F	NOT_ASSIGNED		transcript	taxon:13686	20060515	Uniprot
Uniprot	SI.CL.40.cl.4085.SiJWH11BAUR1E04.scf	SI.CL.40.cl.4085.SiJWH11BAUR1E04.scf		GO:0016491	SP:Q8I9W0_APILI	IEA		F	NOT_ASSIGNED		transcript	taxon:13686	20060515	Uniprot
Uniprot	SI.CL.40.cl.4085.SiJWH11BAUR1E04.scf	SI.CL.40.cl.4085.SiJWH11BAUR1E04.scf		GO:0004601	SP:Q8I9W0_APILI	IEA		F	NOT_ASSIGNED		transcript	taxon:13686	20060515	Uniprot
Uniprot	SI.CL.40.cl.4085.SiJWH11BAUR1E04.scf	SI.CL.40.cl.4085.SiJWH11BAUR1E04.scf		GO:0005506	SP:Q8I9W0_APILI	IEA		F	NOT_ASSIGNED		transcript	taxon:13686	20060515	Uniprot
Uniprot	SI.CL.40.cl.4085.SiJWH11BAUR1E04.scf	SI.CL.40.cl.4085.SiJWH11BAUR1E04.scf		GO:0004096	SP:Q8I9W0_APILI	IEA		F	NOT_ASSIGNED		transcript	taxon:13686	20060515	Uniprot
Uniprot	SI.CL.40.cl.4085.SiJWH11BAUR1E04.scf	SI.CL.40.cl.4085.SiJWH11BAUR1E04.scf		GO:0042744	SP:Q8I9W0_APILI	IEA		P	NOT_ASSIGNED		transcript	taxon:13686	20060515	Uniprot
Uniprot	SI.CL.40.cl.4085.SiJWH11BAUR1E04.scf	SI.CL.40.cl.4085.SiJWH11BAUR1E04.scf		GO:0006118	SP:Q8I9W0_APILI	IEA		P	NOT_ASSIGNED		transcript	taxon:13686	20060515	Uniprot
Uniprot	SI.CL.21.cl.2185.Contig1	SI.CL.21.cl.2185.Contig1		GO:0045449	SP:Q3KQE2_XENLA	IEA		P	NOT_ASSIGNED		transcript	taxon:13686	20060515	Uniprot
Uniprot	SI.CL.21.cl.2185.Contig1	SI.CL.21.cl.2185.Contig1		GO:0005634	SP:Q3KQE2_XENLA	IEA		C	NOT_ASSIGNED		transcript	taxon:13686	20060515	Uniprot
Uniprot	SI.CL.21.cl.2185.Contig1	SI.CL.21.cl.2185.Contig1		GO:0003700	SP:Q3KQE2_XENLA	IEA		F	NOT_ASSIGNED		transcript	taxon:13686	20060515	Uniprot
Uniprot	SI.CL.2.cl.252.Contig1	SI.CL.2.cl.252.Contig1		GO:0005739	SP:NUMM_HUMAN	IEA		C	NOT_ASSIGNED		transcript	taxon:13686	20060515	Uniprot
Uniprot	SI.CL.2.cl.252.Contig1	SI.CL.2.cl.252.Contig1		GO:0008137	SP:NUMM_HUMAN	IEA		F	NOT_ASSIGNED		transcript	taxon:13686	20060515	Uniprot
Uniprot	SI.CL.2.cl.252.Contig1	SI.CL.2.cl.252.Contig1		GO:0016491	SP:NUMM_HUMAN	IEA		F	NOT_ASSIGNED		transcript	taxon:13686	20060515	Uniprot
Uniprot	SI.CL.2.cl.252.Contig1	SI.CL.2.cl.252.Contig1		GO:0003954	SP:NUMM_HUMAN	IEA		F	NOT_ASSIGNED		transcript	taxon:13686	20060515	Uniprot
Uniprot	SI.CL.2.cl.252.Contig1	SI.CL.2.cl.252.Contig1		GO:0006120	SP:NUMM_HUMAN	IEA		P	NOT_ASSIGNED		transcript	taxon:13686	20060515	Uniprot
Uniprot	SiJWE10ACB.scf	SiJWE10ACB.scf		GO:0045598	SP:Q7Z7C8_HUMAN	IEA		P	NOT_ASSIGNED		transcript	taxon:13686	20060515	Uniprot
Uniprot	SiJWE10ACB.scf	SiJWE10ACB.scf		GO:0045893	SP:Q7Z7C8_HUMAN	IEA		P	NOT_ASSIGNED		transcript	taxon:13686	20060515	Uniprot
Uniprot	SiJWE10ACB.scf	SiJWE10ACB.scf		GO:0016563	SP:Q7Z7C8_HUMAN	IEA		F	NOT_ASSIGNED		transcript	taxon:13686	20060515	Uniprot
Uniprot	SiJWE10ACB.scf	SiJWE10ACB.scf		GO:0005515	SP:Q7Z7C8_HUMAN	IEA		F	NOT_ASSIGNED		transcript	taxon:13686	20060515	Uniprot
Uniprot	SiJWE10ACB.scf	SiJWE10ACB.scf		GO:0005669	SP:Q7Z7C8_HUMAN	IEA		C	NOT_ASSIGNED		transcript	taxon:13686	20060515	Uniprot
Uniprot	SI.CL.36.cl.3662.Contig1	SI.CL.36.cl.3662.Contig1		GO:0006955	SP:OTUB1_HUMAN	IEA		P	NOT_ASSIGNED		transcript	taxon:13686	20060515	Uniprot
Uniprot	SI.CL.36.cl.3662.Contig1	SI.CL.36.cl.3662.Contig1		GO:0006512	SP:OTUB1_HUMAN	IEA		P	NOT_ASSIGNED		transcript	taxon:13686	20060515	Uniprot
Uniprot	SI.CL.36.cl.3662.Contig1	SI.CL.36.cl.3662.Contig1		GO:0008234	SP:OTUB1_HUMAN	IEA		F	NOT_ASSIGNED		transcript	taxon:13686	20060515	Uniprot
Uniprot	SI.CL.21.cl.2199.Contig1	SI.CL.21.cl.2199.Contig1		GO:0000004	SP:DENR_HUMAN	IEA		P	NOT_ASSIGNED		transcript	taxon:13686	20060515	Uniprot
Uniprot	SI.CL.21.cl.2199.Contig1	SI.CL.21.cl.2199.Contig1		GO:0003743	SP:DENR_CHICK	IEA		F	NOT_ASSIGNED		transcript	taxon:13686	20060515	Uniprot
Uniprot	SI.CL.21.cl.2199.Contig1	SI.CL.21.cl.2199.Contig1		GO:0008372	SP:DENR_HUMAN	IEA		C	NOT_ASSIGNED		transcript	taxon:13686	20060515	Uniprot
Uniprot	SI.CL.21.cl.2199.Contig1	SI.CL.21.cl.2199.Contig1		GO:0005554	SP:DENR_HUMAN	IEA		F	NOT_ASSIGNED		transcript	taxon:13686	20060515	Uniprot
Uniprot	SI.CL.21.cl.2199.Contig1	SI.CL.21.cl.2199.Contig1		GO:0006413	SP:DENR_CHICK	IEA		P	NOT_ASSIGNED		transcript	taxon:13686	20060515	Uniprot
Uniprot	SI.CL.8.cl.899.Contig1	SI.CL.8.cl.899.Contig1		GO:0006415	SP:Q9H3J6_HUMAN	IEA		P	NOT_ASSIGNED		transcript	taxon:13686	20060515	Uniprot
Uniprot	SI.CL.8.cl.899.Contig1	SI.CL.8.cl.899.Contig1		GO:0016787	SP:Q4WDA1_ASPFU	IEA		F	NOT_ASSIGNED		transcript	taxon:13686	20060515	Uniprot
Uniprot	SI.CL.8.cl.899.Contig1	SI.CL.8.cl.899.Contig1		GO:0003747	SP:Q9H3J6_HUMAN	IEA		F	NOT_ASSIGNED		transcript	taxon:13686	20060515	Uniprot
Uniprot	SI.CL.8.cl.899.Contig1	SI.CL.8.cl.899.Contig1		GO:0005737	SP:Q5G573_MAGGR	IEA		C	NOT_ASSIGNED		transcript	taxon:13686	20060515	Uniprot
Uniprot	SI.CL.8.cl.899.Contig1	SI.CL.8.cl.899.Contig1		GO:0016149	SP:Q5G573_MAGGR	IEA		F	NOT_ASSIGNED		transcript	taxon:13686	20060515	Uniprot
Uniprot	SI.CL.15.cl.1534.Contig1	SI.CL.15.cl.1534.Contig1		GO:0006412	SP:Q4GXB6_9CUCU	IEA		P	NOT_ASSIGNED		transcript	taxon:13686	20060515	Uniprot
Uniprot	SI.CL.15.cl.1534.Contig1	SI.CL.15.cl.1534.Contig1		GO:0005840	SP:Q4GXB6_9CUCU	IEA		C	NOT_ASSIGNED		transcript	taxon:13686	20060515	Uniprot
Uniprot	SI.CL.15.cl.1534.Contig1	SI.CL.15.cl.1534.Contig1		GO:0003735	SP:Q4GXB6_9CUCU	IEA		F	NOT_ASSIGNED		transcript	taxon:13686	20060515	Uniprot
Uniprot	SI.CL.15.cl.1534.Contig1	SI.CL.15.cl.1534.Contig1		GO:0005622	SP:Q4GXB6_9CUCU	IEA		C	NOT_ASSIGNED		transcript	taxon:13686	20060515	Uniprot
Uniprot	SI.CL.25.cl.2524.Contig2	SI.CL.25.cl.2524.Contig2		GO:0005874	SP:TBCA_HUMAN	IEA		C	NOT_ASSIGNED		transcript	taxon:13686	20060515	Uniprot
Uniprot	SI.CL.25.cl.2524.Contig2	SI.CL.25.cl.2524.Contig2		GO:0005856	SP:TBCA_HUMAN	IEA		C	NOT_ASSIGNED		transcript	taxon:13686	20060515	Uniprot
Uniprot	SI.CL.25.cl.2524.Contig2	SI.CL.25.cl.2524.Contig2		GO:0007023	SP:TBCA_HUMAN	IEA		P	NOT_ASSIGNED		transcript	taxon:13686	20060515	Uniprot
Uniprot	SI.CL.25.cl.2524.Contig2	SI.CL.25.cl.2524.Contig2		GO:0006457	SP:TBCA_HUMAN	IEA		P	NOT_ASSIGNED		transcript	taxon:13686	20060515	Uniprot
Uniprot	SI.CL.25.cl.2524.Contig2	SI.CL.25.cl.2524.Contig2		GO:0007022	SP:TBCA_HUMAN	IEA		P	NOT_ASSIGNED		transcript	taxon:13686	20060515	Uniprot
Uniprot	SI.CL.25.cl.2524.Contig2	SI.CL.25.cl.2524.Contig2		GO:0051087	SP:TBCA_HUMAN	IEA		F	NOT_ASSIGNED		transcript	taxon:13686	20060515	Uniprot
Uniprot	SI.CL.25.cl.2524.Contig2	SI.CL.25.cl.2524.Contig2		GO:0007025	SP:TBCA_HUMAN	IEA		P	NOT_ASSIGNED		transcript	taxon:13686	20060515	Uniprot
Uniprot	SI.CL.25.cl.2524.Contig2	SI.CL.25.cl.2524.Contig2		GO:0005737	SP:TBCA_HUMAN	IEA		C	NOT_ASSIGNED		transcript	taxon:13686	20060515	Uniprot
Uniprot	SI.CL.25.cl.2524.Contig2	SI.CL.25.cl.2524.Contig2		GO:0051082	SP:TBCA_HUMAN	IEA		F	NOT_ASSIGNED		transcript	taxon:13686	20060515	Uniprot
Uniprot	SI.CL.42.cl.4242.Contig1	SI.CL.42.cl.4242.Contig1		GO:0005783	SP:CNBP_CHICK	IEA		C	NOT_ASSIGNED		transcript	taxon:13686	20060515	Uniprot
Uniprot	SI.CL.42.cl.4242.Contig1	SI.CL.42.cl.4242.Contig1		GO:0006350	SP:CNBP_CHICK	IEA		P	NOT_ASSIGNED		transcript	taxon:13686	20060515	Uniprot
Uniprot	SI.CL.42.cl.4242.Contig1	SI.CL.42.cl.4242.Contig1		GO:0003677	SP:CNBP_CHICK	IEA		F	NOT_ASSIGNED		transcript	taxon:13686	20060515	Uniprot
Uniprot	SI.CL.42.cl.4242.Contig1	SI.CL.42.cl.4242.Contig1		GO:0003676	SP:ZCH13_HUMAN	IEA		F	NOT_ASSIGNED		transcript	taxon:13686	20060515	Uniprot
Uniprot	SI.CL.42.cl.4242.Contig1	SI.CL.42.cl.4242.Contig1		GO:0046872	SP:CNBP_CHICK	IEA		F	NOT_ASSIGNED		transcript	taxon:13686	20060515	Uniprot
Uniprot	SI.CL.42.cl.4242.Contig1	SI.CL.42.cl.4242.Contig1		GO:0008270	SP:CNBP_CHICK	IEA		F	NOT_ASSIGNED		transcript	taxon:13686	20060515	Uniprot
Uniprot	SI.CL.42.cl.4242.Contig1	SI.CL.42.cl.4242.Contig1		GO:0006355	SP:CNBP_CHICK	IEA		P	NOT_ASSIGNED		transcript	taxon:13686	20060515	Uniprot
Uniprot	SI.CL.3.cl.319.Contig1	SI.CL.3.cl.319.Contig1		GO:0004386	SP:Q2M0I9_DROPS	IEA		F	NOT_ASSIGNED		transcript	taxon:13686	20060515	Uniprot
Uniprot	SI.CL.3.cl.319.Contig1	SI.CL.3.cl.319.Contig1		GO:0003676	SP:U520_HUMAN	IEA		F	NOT_ASSIGNED		transcript	taxon:13686	20060515	Uniprot
Uniprot	SI.CL.3.cl.319.Contig1	SI.CL.3.cl.319.Contig1		GO:0017111	SP:Q2M0I9_DROPS	IEA		F	NOT_ASSIGNED		transcript	taxon:13686	20060515	Uniprot
Uniprot	SI.CL.3.cl.319.Contig1	SI.CL.3.cl.319.Contig1		GO:0008380	SP:U520_HUMAN	IEA		P	NOT_ASSIGNED		transcript	taxon:13686	20060515	Uniprot
Uniprot	SI.CL.3.cl.319.Contig1	SI.CL.3.cl.319.Contig1		GO:0005681	SP:U520_HUMAN	IEA		C	NOT_ASSIGNED		transcript	taxon:13686	20060515	Uniprot
Uniprot	SI.CL.3.cl.319.Contig1	SI.CL.3.cl.319.Contig1		GO:0000166	SP:U520_HUMAN	IEA		F	NOT_ASSIGNED		transcript	taxon:13686	20060515	Uniprot
Uniprot	SI.CL.3.cl.319.Contig1	SI.CL.3.cl.319.Contig1		GO:0005524	SP:U520_HUMAN	IEA		F	NOT_ASSIGNED		transcript	taxon:13686	20060515	Uniprot
Uniprot	SI.CL.3.cl.319.Contig1	SI.CL.3.cl.319.Contig1		GO:0016787	SP:U520_HUMAN	IEA		F	NOT_ASSIGNED		transcript	taxon:13686	20060515	Uniprot
Uniprot	SI.CL.3.cl.319.Contig1	SI.CL.3.cl.319.Contig1		GO:0005682	SP:U520_HUMAN	IEA		C	NOT_ASSIGNED		transcript	taxon:13686	20060515	Uniprot
Uniprot	SI.CL.3.cl.319.Contig1	SI.CL.3.cl.319.Contig1		GO:0004004	SP:U520_HUMAN	IEA		F	NOT_ASSIGNED		transcript	taxon:13686	20060515	Uniprot
Uniprot	SI.CL.3.cl.319.Contig1	SI.CL.3.cl.319.Contig1		GO:0005515	SP:U520_HUMAN	IEA		F	NOT_ASSIGNED		transcript	taxon:13686	20060515	Uniprot
Uniprot	SI.CL.3.cl.319.Contig1	SI.CL.3.cl.319.Contig1		GO:0008026	SP:Q2M0I9_DROPS	IEA		F	NOT_ASSIGNED		transcript	taxon:13686	20060515	Uniprot
Uniprot	SI.CL.3.cl.319.Contig1	SI.CL.3.cl.319.Contig1		GO:0000360	SP:U520_HUMAN	IEA		P	NOT_ASSIGNED		transcript	taxon:13686	20060515	Uniprot
Uniprot	SI.CL.3.cl.319.Contig1	SI.CL.3.cl.319.Contig1		GO:0000398	SP:U520_HUMAN	IEA		P	NOT_ASSIGNED		transcript	taxon:13686	20060515	Uniprot
Uniprot	SI.CL.19.cl.1906.Contig1	SI.CL.19.cl.1906.Contig1		GO:0007367	SP:ARM_MUSDO	IEA		P	NOT_ASSIGNED		transcript	taxon:13686	20060515	Uniprot
Uniprot	SI.CL.19.cl.1906.Contig1	SI.CL.19.cl.1906.Contig1		GO:0005856	SP:ARM_MUSDO	IEA		C	NOT_ASSIGNED		transcript	taxon:13686	20060515	Uniprot
Uniprot	SI.CL.19.cl.1906.Contig1	SI.CL.19.cl.1906.Contig1		GO:0005488	SP:ARM_MUSDO	IEA		F	NOT_ASSIGNED		transcript	taxon:13686	20060515	Uniprot
Uniprot	SI.CL.19.cl.1906.Contig1	SI.CL.19.cl.1906.Contig1		GO:0016055	SP:ARM_MUSDO	IEA		P	NOT_ASSIGNED		transcript	taxon:13686	20060515	Uniprot
Uniprot	SI.CL.19.cl.1906.Contig1	SI.CL.19.cl.1906.Contig1		GO:0016020	SP:ARM_MUSDO	IEA		C	NOT_ASSIGNED		transcript	taxon:13686	20060515	Uniprot
Uniprot	SI.CL.19.cl.1906.Contig1	SI.CL.19.cl.1906.Contig1		GO:0005198	SP:ARM_MUSDO	IEA		F	NOT_ASSIGNED		transcript	taxon:13686	20060515	Uniprot
Uniprot	SI.CL.19.cl.1906.Contig1	SI.CL.19.cl.1906.Contig1		GO:0007275	SP:ARM_MUSDO	IEA		P	NOT_ASSIGNED		transcript	taxon:13686	20060515	Uniprot
Uniprot	SI.CL.19.cl.1906.Contig1	SI.CL.19.cl.1906.Contig1		GO:0005515	SP:ARM_MUSDO	IEA		F	NOT_ASSIGNED		transcript	taxon:13686	20060515	Uniprot
Uniprot	SI.CL.19.cl.1906.Contig1	SI.CL.19.cl.1906.Contig1		GO:0007155	SP:ARM_MUSDO	IEA		P	NOT_ASSIGNED		transcript	taxon:13686	20060515	Uniprot
Uniprot	SiJWG12BDJ.scf	SiJWG12BDJ.scf		GO:0005874	SP:DCTN2_HUMAN	IEA		C	NOT_ASSIGNED		transcript	taxon:13686	20060515	Uniprot
Uniprot	SiJWG12BDJ.scf	SiJWG12BDJ.scf		GO:0003774	SP:DCTN2_HUMAN	IEA		F	NOT_ASSIGNED		transcript	taxon:13686	20060515	Uniprot
Uniprot	SiJWG12BDJ.scf	SiJWG12BDJ.scf		GO:0005856	SP:DCTN2_HUMAN	IEA		C	NOT_ASSIGNED		transcript	taxon:13686	20060515	Uniprot
Uniprot	SiJWG12BDJ.scf	SiJWG12BDJ.scf		GO:0016020	SP:DCTN2_HUMAN	IEA		C	NOT_ASSIGNED		transcript	taxon:13686	20060515	Uniprot
Uniprot	SiJWG12BDJ.scf	SiJWG12BDJ.scf		GO:0008283	SP:DCTN2_HUMAN	IEA		P	NOT_ASSIGNED		transcript	taxon:13686	20060515	Uniprot
Uniprot	SiJWG12BDJ.scf	SiJWG12BDJ.scf		GO:0030286	SP:DCTN2_HUMAN	IEA		C	NOT_ASSIGNED		transcript	taxon:13686	20060515	Uniprot
Uniprot	SiJWG12BDJ.scf	SiJWG12BDJ.scf		GO:0005813	SP:DCTN2_HUMAN	IEA		C	NOT_ASSIGNED		transcript	taxon:13686	20060515	Uniprot
Uniprot	SiJWG12BDJ.scf	SiJWG12BDJ.scf		GO:0007017	SP:Q9PTG6_CHICK	IEA		P	NOT_ASSIGNED		transcript	taxon:13686	20060515	Uniprot
Uniprot	SiJWG12BDJ.scf	SiJWG12BDJ.scf		GO:0000776	SP:DCTN2_HUMAN	IEA		C	NOT_ASSIGNED		transcript	taxon:13686	20060515	Uniprot
Uniprot	SiJWG12BDJ.scf	SiJWG12BDJ.scf		GO:0005869	SP:Q9PTG6_CHICK	IEA		C	NOT_ASSIGNED		transcript	taxon:13686	20060515	Uniprot
Uniprot	SiJWG12BDJ.scf	SiJWG12BDJ.scf		GO:0007067	SP:DCTN2_HUMAN	IEA		P	NOT_ASSIGNED		transcript	taxon:13686	20060515	Uniprot
Uniprot	SiJWG05BDU.scf	SiJWG05BDU.scf		GO:0005634	SP:ZNF16_HUMAN	IEA		C	NOT_ASSIGNED		transcript	taxon:13686	20060515	Uniprot
Uniprot	SiJWG05BDU.scf	SiJWG05BDU.scf		GO:0006350	SP:ZNF16_HUMAN	IEA		P	NOT_ASSIGNED		transcript	taxon:13686	20060515	Uniprot
Uniprot	SiJWG05BDU.scf	SiJWG05BDU.scf		GO:0003677	SP:ZNF16_HUMAN	IEA		F	NOT_ASSIGNED		transcript	taxon:13686	20060515	Uniprot
Uniprot	SiJWG05BDU.scf	SiJWG05BDU.scf		GO:0003676	SP:Q45SH7_HUMAN	IEA		F	NOT_ASSIGNED		transcript	taxon:13686	20060515	Uniprot
Uniprot	SiJWG05BDU.scf	SiJWG05BDU.scf		GO:0046872	SP:ZNF16_HUMAN	IEA		F	NOT_ASSIGNED		transcript	taxon:13686	20060515	Uniprot
Uniprot	SiJWG05BDU.scf	SiJWG05BDU.scf		GO:0008270	SP:ZNF16_HUMAN	IEA		F	NOT_ASSIGNED		transcript	taxon:13686	20060515	Uniprot
Uniprot	SiJWG05BDU.scf	SiJWG05BDU.scf		GO:0006355	SP:ZNF16_HUMAN	IEA		P	NOT_ASSIGNED		transcript	taxon:13686	20060515	Uniprot
Uniprot	SI.CL.0.cl.019.Contig1	SI.CL.0.cl.019.Contig1		GO:0000074	SP:PSD8_HUMAN	IEA		P	NOT_ASSIGNED		transcript	taxon:13686	20060515	Uniprot
Uniprot	SI.CL.0.cl.019.Contig1	SI.CL.0.cl.019.Contig1		GO:0005838	SP:PSD8_HUMAN	IEA		C	NOT_ASSIGNED		transcript	taxon:13686	20060515	Uniprot
Uniprot	SI.CL.0.cl.019.Contig1	SI.CL.0.cl.019.Contig1		GO:0006508	SP:PSD8_HUMAN	IEA		P	NOT_ASSIGNED		transcript	taxon:13686	20060515	Uniprot
Uniprot	SI.CL.0.cl.019.Contig1	SI.CL.0.cl.019.Contig1		GO:0005829	SP:PSD8_HUMAN	IEA		C	NOT_ASSIGNED		transcript	taxon:13686	20060515	Uniprot
Uniprot	SiJWE04BBE.scf	SiJWE04BBE.scf		GO:0005634	SP:PRP4_PONPY	IEA		C	NOT_ASSIGNED		transcript	taxon:13686	20060515	Uniprot
Uniprot	SiJWE04BBE.scf	SiJWE04BBE.scf		GO:0006397	SP:PRP4_PONPY	IEA		P	NOT_ASSIGNED		transcript	taxon:13686	20060515	Uniprot
Uniprot	SiJWE04BBE.scf	SiJWE04BBE.scf		GO:0031202	SP:PRP4_HUMAN	IEA		F	NOT_ASSIGNED		transcript	taxon:13686	20060515	Uniprot
Uniprot	SiJWE04BBE.scf	SiJWE04BBE.scf		GO:0008380	SP:Q3MHE2_BOVIN	IEA		P	NOT_ASSIGNED		transcript	taxon:13686	20060515	Uniprot
Uniprot	SiJWE04BBE.scf	SiJWE04BBE.scf		GO:0000398	SP:PRP4_HUMAN	IEA		P	NOT_ASSIGNED		transcript	taxon:13686	20060515	Uniprot
Uniprot	SiJWE04BBE.scf	SiJWE04BBE.scf		GO:0005681	SP:PRP4_HUMAN	IEA		C	NOT_ASSIGNED		transcript	taxon:13686	20060515	Uniprot
Uniprot	SI.CL.3.cl.369.Contig1	SI.CL.3.cl.369.Contig1		GO:0016301	SP:Q4RF87_TETNG	IEA		F	NOT_ASSIGNED		transcript	taxon:13686	20060515	Uniprot
Uniprot	SI.CL.3.cl.369.Contig1	SI.CL.3.cl.369.Contig1		GO:0016740	SP:Q4RF87_TETNG	IEA		F	NOT_ASSIGNED		transcript	taxon:13686	20060515	Uniprot
Uniprot	SI.CL.32.cl.3234.Contig1	SI.CL.32.cl.3234.Contig1		GO:0005856	SP:SIRT2_HUMAN	IEA		C	NOT_ASSIGNED		transcript	taxon:13686	20060515	Uniprot
Uniprot	SI.CL.32.cl.3234.Contig1	SI.CL.32.cl.3234.Contig1		GO:0016481	SP:SIRT2_HUMAN	IEA		P	NOT_ASSIGNED		transcript	taxon:13686	20060515	Uniprot
Uniprot	SI.CL.32.cl.3234.Contig1	SI.CL.32.cl.3234.Contig1		GO:0046872	SP:SIRT2_HUMAN	IEA		F	NOT_ASSIGNED		transcript	taxon:13686	20060515	Uniprot
Uniprot	SI.CL.32.cl.3234.Contig1	SI.CL.32.cl.3234.Contig1		GO:0016575	SP:SIRT2_HUMAN	IEA		P	NOT_ASSIGNED		transcript	taxon:13686	20060515	Uniprot
Uniprot	SI.CL.32.cl.3234.Contig1	SI.CL.32.cl.3234.Contig1		GO:0006348	SP:SIRT2_HUMAN	IEA		P	NOT_ASSIGNED		transcript	taxon:13686	20060515	Uniprot
Uniprot	SI.CL.32.cl.3234.Contig1	SI.CL.32.cl.3234.Contig1		GO:0003677	SP:Q5ZID4_CHICK	IEA		F	NOT_ASSIGNED		transcript	taxon:13686	20060515	Uniprot
Uniprot	SI.CL.32.cl.3234.Contig1	SI.CL.32.cl.3234.Contig1		GO:0006342	SP:Q5ZID4_CHICK	IEA		P	NOT_ASSIGNED		transcript	taxon:13686	20060515	Uniprot
Uniprot	SI.CL.32.cl.3234.Contig1	SI.CL.32.cl.3234.Contig1		GO:0042325	SP:SIRT2_HUMAN	IEA		P	NOT_ASSIGNED		transcript	taxon:13686	20060515	Uniprot
Uniprot	SI.CL.32.cl.3234.Contig1	SI.CL.32.cl.3234.Contig1		GO:0016787	SP:SIRT2_HUMAN	IEA		F	NOT_ASSIGNED		transcript	taxon:13686	20060515	Uniprot
Uniprot	SI.CL.32.cl.3234.Contig1	SI.CL.32.cl.3234.Contig1		GO:0007049	SP:SIRT2_HUMAN	IEA		P	NOT_ASSIGNED		transcript	taxon:13686	20060515	Uniprot
Uniprot	SI.CL.32.cl.3234.Contig1	SI.CL.32.cl.3234.Contig1		GO:0035035	SP:SIRT2_HUMAN	IEA		F	NOT_ASSIGNED		transcript	taxon:13686	20060515	Uniprot
Uniprot	SI.CL.32.cl.3234.Contig1	SI.CL.32.cl.3234.Contig1		GO:0005737	SP:SIRT2_HUMAN	IEA		C	NOT_ASSIGNED		transcript	taxon:13686	20060515	Uniprot
Uniprot	SI.CL.32.cl.3234.Contig1	SI.CL.32.cl.3234.Contig1		GO:0006471	SP:SIRT2_HUMAN	IEA		P	NOT_ASSIGNED		transcript	taxon:13686	20060515	Uniprot
Uniprot	SI.CL.32.cl.3234.Contig1	SI.CL.32.cl.3234.Contig1		GO:0007067	SP:SIRT2_HUMAN	IEA		P	NOT_ASSIGNED		transcript	taxon:13686	20060515	Uniprot
Uniprot	SI.CL.32.cl.3234.Contig1	SI.CL.32.cl.3234.Contig1		GO:0006355	SP:Q5ZID4_CHICK	IEA		P	NOT_ASSIGNED		transcript	taxon:13686	20060515	Uniprot
Uniprot	SI.CL.32.cl.3234.Contig1	SI.CL.32.cl.3234.Contig1		GO:0005874	SP:SIRT2_HUMAN	IEA		C	NOT_ASSIGNED		transcript	taxon:13686	20060515	Uniprot
Uniprot	SI.CL.32.cl.3234.Contig1	SI.CL.32.cl.3234.Contig1		GO:0051301	SP:SIRT2_HUMAN	IEA		P	NOT_ASSIGNED		transcript	taxon:13686	20060515	Uniprot
Uniprot	SI.CL.32.cl.3234.Contig1	SI.CL.32.cl.3234.Contig1		GO:0008134	SP:SIRT2_HUMAN	IEA		F	NOT_ASSIGNED		transcript	taxon:13686	20060515	Uniprot
Uniprot	SI.CL.32.cl.3234.Contig1	SI.CL.32.cl.3234.Contig1		GO:0042903	SP:SIRT2_HUMAN	IEA		F	NOT_ASSIGNED		transcript	taxon:13686	20060515	Uniprot
Uniprot	SI.CL.32.cl.3234.Contig1	SI.CL.32.cl.3234.Contig1		GO:0043130	SP:SIRT2_HUMAN	IEA		F	NOT_ASSIGNED		transcript	taxon:13686	20060515	Uniprot
Uniprot	SI.CL.32.cl.3234.Contig1	SI.CL.32.cl.3234.Contig1		GO:0042826	SP:SIRT2_HUMAN	IEA		F	NOT_ASSIGNED		transcript	taxon:13686	20060515	Uniprot
Uniprot	SI.CL.32.cl.3234.Contig1	SI.CL.32.cl.3234.Contig1		GO:0045843	SP:SIRT2_HUMAN	IEA		P	NOT_ASSIGNED		transcript	taxon:13686	20060515	Uniprot
Uniprot	SI.CL.32.cl.3234.Contig1	SI.CL.32.cl.3234.Contig1		GO:0005677	SP:Q5ZID4_CHICK	IEA		C	NOT_ASSIGNED		transcript	taxon:13686	20060515	Uniprot
Uniprot	SI.CL.32.cl.3234.Contig1	SI.CL.32.cl.3234.Contig1		GO:0000183	SP:SIRT2_HUMAN	IEA		P	NOT_ASSIGNED		transcript	taxon:13686	20060515	Uniprot
Uniprot	SI.CL.32.cl.3234.Contig1	SI.CL.32.cl.3234.Contig1		GO:0017136	SP:SIRT2_HUMAN	IEA		F	NOT_ASSIGNED		transcript	taxon:13686	20060515	Uniprot
Uniprot	SI.CL.32.cl.3234.Contig1	SI.CL.32.cl.3234.Contig1		GO:0008270	SP:SIRT2_HUMAN	IEA		F	NOT_ASSIGNED		transcript	taxon:13686	20060515	Uniprot
Uniprot	SI.CL.32.cl.3234.Contig1	SI.CL.32.cl.3234.Contig1		GO:0006980	SP:SIRT2_HUMAN	IEA		P	NOT_ASSIGNED		transcript	taxon:13686	20060515	Uniprot
Uniprot	SI.CL.32.cl.3234.Contig1	SI.CL.32.cl.3234.Contig1		GO:0007096	SP:SIRT2_HUMAN	IEA		P	NOT_ASSIGNED		transcript	taxon:13686	20060515	Uniprot
Uniprot	SI.CL.5.cl.502.SiJWF02BAP.scf	SI.CL.5.cl.502.SiJWF02BAP.scf		GO:0004128	SP:Q9UHJ0_HUMAN	IEA		F	NOT_ASSIGNED		transcript	taxon:13686	20060515	Uniprot
Uniprot	SI.CL.5.cl.502.SiJWF02BAP.scf	SI.CL.5.cl.502.SiJWF02BAP.scf		GO:0016020	SP:Q9UHJ0_HUMAN	IEA		C	NOT_ASSIGNED		transcript	taxon:13686	20060515	Uniprot
Uniprot	SI.CL.5.cl.502.SiJWF02BAP.scf	SI.CL.5.cl.502.SiJWF02BAP.scf		GO:0050660	SP:Q9UHJ0_HUMAN	IEA		F	NOT_ASSIGNED		transcript	taxon:13686	20060515	Uniprot
Uniprot	SI.CL.5.cl.502.SiJWF02BAP.scf	SI.CL.5.cl.502.SiJWF02BAP.scf		GO:0016491	SP:Q9UHJ0_HUMAN	IEA		F	NOT_ASSIGNED		transcript	taxon:13686	20060515	Uniprot
Uniprot	SI.CL.5.cl.502.SiJWF02BAP.scf	SI.CL.5.cl.502.SiJWF02BAP.scf		GO:0005625	SP:Q9UHJ0_HUMAN	IEA		C	NOT_ASSIGNED		transcript	taxon:13686	20060515	Uniprot
Uniprot	SI.CL.5.cl.502.SiJWF02BAP.scf	SI.CL.5.cl.502.SiJWF02BAP.scf		GO:0051287	SP:Q9UHJ0_HUMAN	IEA		F	NOT_ASSIGNED		transcript	taxon:13686	20060515	Uniprot
Uniprot	SI.CL.5.cl.502.SiJWF02BAP.scf	SI.CL.5.cl.502.SiJWF02BAP.scf		GO:0006118	SP:Q9UHJ0_HUMAN	IEA		P	NOT_ASSIGNED		transcript	taxon:13686	20060515	Uniprot
Uniprot	SiJWD02ABC.scf	SiJWD02ABC.scf		GO:0005634	SP:RXRG_CHICK	IEA		C	NOT_ASSIGNED		transcript	taxon:13686	20060515	Uniprot
Uniprot	SiJWD02ABC.scf	SiJWD02ABC.scf		GO:0043565	SP:RXRG_CHICK	IEA		F	NOT_ASSIGNED		transcript	taxon:13686	20060515	Uniprot
Uniprot	SiJWD02ABC.scf	SiJWD02ABC.scf		GO:0046872	SP:RXRG_CHICK	IEA		F	NOT_ASSIGNED		transcript	taxon:13686	20060515	Uniprot
Uniprot	SiJWD02ABC.scf	SiJWD02ABC.scf		GO:0004879	SP:O96041_BOMMO	IEA		F	NOT_ASSIGNED		transcript	taxon:13686	20060515	Uniprot
Uniprot	SiJWD02ABC.scf	SiJWD02ABC.scf		GO:0003707	SP:RXRG_CHICK	IEA		F	NOT_ASSIGNED		transcript	taxon:13686	20060515	Uniprot
Uniprot	SiJWD02ABC.scf	SiJWD02ABC.scf		GO:0003677	SP:O96041_BOMMO	IEA		F	NOT_ASSIGNED		transcript	taxon:13686	20060515	Uniprot
Uniprot	SiJWD02ABC.scf	SiJWD02ABC.scf		GO:0005496	SP:RXRG_CHICK	IEA		F	NOT_ASSIGNED		transcript	taxon:13686	20060515	Uniprot
Uniprot	SiJWD02ABC.scf	SiJWD02ABC.scf		GO:0006350	SP:RXRG_CHICK	IEA		P	NOT_ASSIGNED		transcript	taxon:13686	20060515	Uniprot
Uniprot	SiJWD02ABC.scf	SiJWD02ABC.scf		GO:0003700	SP:RXRG_CHICK	IEA		F	NOT_ASSIGNED		transcript	taxon:13686	20060515	Uniprot
Uniprot	SiJWD02ABC.scf	SiJWD02ABC.scf		GO:0008270	SP:RXRG_CHICK	IEA		F	NOT_ASSIGNED		transcript	taxon:13686	20060515	Uniprot
Uniprot	SiJWD02ABC.scf	SiJWD02ABC.scf		GO:0004872	SP:O96041_BOMMO	IEA		F	NOT_ASSIGNED		transcript	taxon:13686	20060515	Uniprot
Uniprot	SiJWD02ABC.scf	SiJWD02ABC.scf		GO:0006355	SP:RXRG_CHICK	IEA		P	NOT_ASSIGNED		transcript	taxon:13686	20060515	Uniprot
Uniprot	SI.CL.26.cl.2662.Contig1	SI.CL.26.cl.2662.Contig1		GO:0005739	SP:RM27_HUMAN	IEA		C	NOT_ASSIGNED		transcript	taxon:13686	20060515	Uniprot
Uniprot	SI.CL.26.cl.2662.Contig1	SI.CL.26.cl.2662.Contig1		GO:0005762	SP:RM27_HUMAN	IEA		C	NOT_ASSIGNED		transcript	taxon:13686	20060515	Uniprot
Uniprot	SI.CL.26.cl.2662.Contig1	SI.CL.26.cl.2662.Contig1		GO:0005840	SP:Q32PC3_BOVIN	IEA		C	NOT_ASSIGNED		transcript	taxon:13686	20060515	Uniprot
Uniprot	SI.CL.26.cl.2662.Contig1	SI.CL.26.cl.2662.Contig1		GO:0006412	SP:Q32PC3_BOVIN	IEA		P	NOT_ASSIGNED		transcript	taxon:13686	20060515	Uniprot
Uniprot	SI.CL.26.cl.2662.Contig1	SI.CL.26.cl.2662.Contig1		GO:0003735	SP:Q32PC3_BOVIN	IEA		F	NOT_ASSIGNED		transcript	taxon:13686	20060515	Uniprot
Uniprot	SI.CL.26.cl.2662.Contig1	SI.CL.26.cl.2662.Contig1		GO:0005622	SP:Q32PC3_BOVIN	IEA		C	NOT_ASSIGNED		transcript	taxon:13686	20060515	Uniprot
Uniprot	SI.CL.8.cl.882.Contig1	SI.CL.8.cl.882.Contig1		GO:0007601	SP:PDE6D_BOVIN	IEA		P	NOT_ASSIGNED		transcript	taxon:13686	20060515	Uniprot
Uniprot	SI.CL.8.cl.882.Contig1	SI.CL.8.cl.882.Contig1		GO:0004114	SP:PDE6D_BOVIN	IEA		F	NOT_ASSIGNED		transcript	taxon:13686	20060515	Uniprot
Uniprot	SI.CL.8.cl.882.Contig1	SI.CL.8.cl.882.Contig1		GO:0016787	SP:PDE6D_BOVIN	IEA		F	NOT_ASSIGNED		transcript	taxon:13686	20060515	Uniprot
Uniprot	SI.CL.8.cl.882.Contig1	SI.CL.8.cl.882.Contig1		GO:0050896	SP:PDE6D_BOVIN	IEA		P	NOT_ASSIGNED		transcript	taxon:13686	20060515	Uniprot
Uniprot	SiJWA04ADT.scf	SiJWA04ADT.scf		GO:0005488	SP:TBCD_BOVIN	IEA		F	NOT_ASSIGNED		transcript	taxon:13686	20060515	Uniprot
Uniprot	SiJWA04ADT.scf	SiJWA04ADT.scf		GO:0006457	SP:TBCD_BOVIN	IEA		P	NOT_ASSIGNED		transcript	taxon:13686	20060515	Uniprot
Uniprot	SiJWA04ADT.scf	SiJWA04ADT.scf		GO:0051082	SP:TBCD_BOVIN	IEA		F	NOT_ASSIGNED		transcript	taxon:13686	20060515	Uniprot
Uniprot	SiJWA05BCY2.scf	SiJWA05BCY2.scf		GO:0005488	SP:Q4S6Y3_TETNG	IEA		F	NOT_ASSIGNED		transcript	taxon:13686	20060515	Uniprot
Uniprot	SiJWA05BCY2.scf	SiJWA05BCY2.scf		GO:0003824	SP:Q4S6Y3_TETNG	IEA		F	NOT_ASSIGNED		transcript	taxon:13686	20060515	Uniprot
Uniprot	SI.CL.21.cl.2188.Contig1	SI.CL.21.cl.2188.Contig1		GO:0016068	SP:VA2_SOLIN	IEA		P	NOT_ASSIGNED		transcript	taxon:13686	20060515	Uniprot
Uniprot	SI.CL.21.cl.2188.Contig1	SI.CL.21.cl.2188.Contig1		GO:0005549	SP:VA4_SOLIN	IEA		F	NOT_ASSIGNED		transcript	taxon:13686	20060515	Uniprot
Uniprot	SI.CL.21.cl.2188.Contig1	SI.CL.21.cl.2188.Contig1		GO:0006810	SP:VA4_SOLIN	IEA		P	NOT_ASSIGNED		transcript	taxon:13686	20060515	Uniprot
Uniprot	SI.CL.11.cl.1186.Contig1	SI.CL.11.cl.1186.Contig1		GO:0005634	SP:RBX1_HUMAN	IEA		C	NOT_ASSIGNED		transcript	taxon:13686	20060515	Uniprot
Uniprot	SI.CL.11.cl.1186.Contig1	SI.CL.11.cl.1186.Contig1		GO:0046872	SP:RBX1_HUMAN	IEA		F	NOT_ASSIGNED		transcript	taxon:13686	20060515	Uniprot
Uniprot	SI.CL.11.cl.1186.Contig1	SI.CL.11.cl.1186.Contig1		GO:0008270	SP:RBX1_HUMAN	IEA		F	NOT_ASSIGNED		transcript	taxon:13686	20060515	Uniprot
Uniprot	SI.CL.11.cl.1186.Contig1	SI.CL.11.cl.1186.Contig1		GO:0005515	SP:RBX1_HUMAN	IEA		F	NOT_ASSIGNED		transcript	taxon:13686	20060515	Uniprot
Uniprot	SI.CL.11.cl.1186.Contig1	SI.CL.11.cl.1186.Contig1		GO:0006512	SP:RBX1_HUMAN	IEA		P	NOT_ASSIGNED		transcript	taxon:13686	20060515	Uniprot
Uniprot	SiJWC06AAP.scf	SiJWC06AAP.scf		GO:0005739	SP:RM49_BOVIN	IEA		C	NOT_ASSIGNED		transcript	taxon:13686	20060515	Uniprot
Uniprot	SiJWC06AAP.scf	SiJWC06AAP.scf		GO:0005840	SP:RM49_BOVIN	IEA		C	NOT_ASSIGNED		transcript	taxon:13686	20060515	Uniprot
Uniprot	SiJWC06AAP.scf	SiJWC06AAP.scf		GO:0006412	SP:RM49_BOVIN	IEA		P	NOT_ASSIGNED		transcript	taxon:13686	20060515	Uniprot
Uniprot	SiJWC06AAP.scf	SiJWC06AAP.scf		GO:0003743	SP:RM49_BOVIN	IEA		F	NOT_ASSIGNED		transcript	taxon:13686	20060515	Uniprot
Uniprot	SiJWC06AAP.scf	SiJWC06AAP.scf		GO:0030529	SP:RM49_MACFA	IEA		C	NOT_ASSIGNED		transcript	taxon:13686	20060515	Uniprot
Uniprot	SiJWC06AAP.scf	SiJWC06AAP.scf		GO:0006413	SP:RM49_BOVIN	IEA		P	NOT_ASSIGNED		transcript	taxon:13686	20060515	Uniprot
Uniprot	SiJWC06AAP.scf	SiJWC06AAP.scf		GO:0005554	SP:RM49_HUMAN	IEA		F	NOT_ASSIGNED		transcript	taxon:13686	20060515	Uniprot
Uniprot	SiJWC06AAP.scf	SiJWC06AAP.scf		GO:0008372	SP:RM49_HUMAN	IEA		C	NOT_ASSIGNED		transcript	taxon:13686	20060515	Uniprot
Uniprot	SiJWC06AAP.scf	SiJWC06AAP.scf		GO:0003735	SP:RM49_BOVIN	IEA		F	NOT_ASSIGNED		transcript	taxon:13686	20060515	Uniprot
Uniprot	SiJWC06AAP.scf	SiJWC06AAP.scf		GO:0005622	SP:Q4T949_TETNG	IEA		C	NOT_ASSIGNED		transcript	taxon:13686	20060515	Uniprot
Uniprot	SI.CL.8.cl.839.Contig1	SI.CL.8.cl.839.Contig1		GO:0005634	SP:RPC10_HUMAN	IEA		C	NOT_ASSIGNED		transcript	taxon:13686	20060515	Uniprot
Uniprot	SI.CL.8.cl.839.Contig1	SI.CL.8.cl.839.Contig1		GO:0046872	SP:RPC10_HUMAN	IEA		F	NOT_ASSIGNED		transcript	taxon:13686	20060515	Uniprot
Uniprot	SI.CL.8.cl.839.Contig1	SI.CL.8.cl.839.Contig1		GO:0006356	SP:RPC10_HUMAN	IEA		P	NOT_ASSIGNED		transcript	taxon:13686	20060515	Uniprot
Uniprot	SI.CL.8.cl.839.Contig1	SI.CL.8.cl.839.Contig1		GO:0005666	SP:RPC10_HUMAN	IEA		C	NOT_ASSIGNED		transcript	taxon:13686	20060515	Uniprot
Uniprot	SI.CL.8.cl.839.Contig1	SI.CL.8.cl.839.Contig1		GO:0005665	SP:RPC10_HUMAN	IEA		C	NOT_ASSIGNED		transcript	taxon:13686	20060515	Uniprot
Uniprot	SI.CL.8.cl.839.Contig1	SI.CL.8.cl.839.Contig1		GO:0006383	SP:RPC10_HUMAN	IEA		P	NOT_ASSIGNED		transcript	taxon:13686	20060515	Uniprot
Uniprot	SI.CL.8.cl.839.Contig1	SI.CL.8.cl.839.Contig1		GO:0003677	SP:Q3ZBC0_BOVIN	IEA		F	NOT_ASSIGNED		transcript	taxon:13686	20060515	Uniprot
Uniprot	SI.CL.8.cl.839.Contig1	SI.CL.8.cl.839.Contig1		GO:0006350	SP:Q3ZBC0_BOVIN	IEA		P	NOT_ASSIGNED		transcript	taxon:13686	20060515	Uniprot
Uniprot	SI.CL.8.cl.839.Contig1	SI.CL.8.cl.839.Contig1		GO:0006366	SP:RPC10_HUMAN	IEA		P	NOT_ASSIGNED		transcript	taxon:13686	20060515	Uniprot
Uniprot	SI.CL.8.cl.839.Contig1	SI.CL.8.cl.839.Contig1		GO:0008270	SP:RPC10_HUMAN	IEA		F	NOT_ASSIGNED		transcript	taxon:13686	20060515	Uniprot
Uniprot	SI.CL.8.cl.839.Contig1	SI.CL.8.cl.839.Contig1		GO:0003899	SP:Q3ZBC0_BOVIN	IEA		F	NOT_ASSIGNED		transcript	taxon:13686	20060515	Uniprot
Uniprot	SI.CL.8.cl.839.Contig1	SI.CL.8.cl.839.Contig1		GO:0016740	SP:RPC10_HUMAN	IEA		F	NOT_ASSIGNED		transcript	taxon:13686	20060515	Uniprot
Uniprot	SiJWD05ABQ.scf	SiJWD05ABQ.scf		GO:0006986	SP:Q5CCL5_BOMMO	IEA		P	NOT_ASSIGNED		transcript	taxon:13686	20060515	Uniprot
Uniprot	SiJWD05ABQ.scf	SiJWD05ABQ.scf		GO:0016020	SP:Q8T895_CIOIN	IEA		C	NOT_ASSIGNED		transcript	taxon:13686	20060515	Uniprot
Uniprot	SiJWD05ABQ.scf	SiJWD05ABQ.scf		GO:0015031	SP:Q8T895_CIOIN	IEA		P	NOT_ASSIGNED		transcript	taxon:13686	20060515	Uniprot
Uniprot	SiJWD05ABQ.scf	SiJWD05ABQ.scf		GO:0006457	SP:Q4RZW1_TETNG	IEA		P	NOT_ASSIGNED		transcript	taxon:13686	20060515	Uniprot
Uniprot	SiJWD05ABQ.scf	SiJWD05ABQ.scf		GO:0016021	SP:Q8T895_CIOIN	IEA		C	NOT_ASSIGNED		transcript	taxon:13686	20060515	Uniprot
Uniprot	SiJWD05ABQ.scf	SiJWD05ABQ.scf		GO:0031072	SP:Q4RZW1_TETNG	IEA		F	NOT_ASSIGNED		transcript	taxon:13686	20060515	Uniprot
Uniprot	SiJWD05ABQ.scf	SiJWD05ABQ.scf		GO:0006605	SP:Q8T895_CIOIN	IEA		P	NOT_ASSIGNED		transcript	taxon:13686	20060515	Uniprot
Uniprot	SiJWD05ABQ.scf	SiJWD05ABQ.scf		GO:0051082	SP:Q4RZW1_TETNG	IEA		F	NOT_ASSIGNED		transcript	taxon:13686	20060515	Uniprot
Uniprot	SiJWD05ABQ.scf	SiJWD05ABQ.scf		GO:0006810	SP:Q8T895_CIOIN	IEA		P	NOT_ASSIGNED		transcript	taxon:13686	20060515	Uniprot
Uniprot	SI.CL.43.cl.4303.SiJWG03BDQR5C12.scf	SI.CL.43.cl.4303.SiJWG03BDQR5C12.scf		GO:0000004	SP:TBL2_HUMAN	IEA		P	NOT_ASSIGNED		transcript	taxon:13686	20060515	Uniprot
Uniprot	SI.CL.43.cl.4303.SiJWG03BDQR5C12.scf	SI.CL.43.cl.4303.SiJWG03BDQR5C12.scf		GO:0008372	SP:TBL2_HUMAN	IEA		C	NOT_ASSIGNED		transcript	taxon:13686	20060515	Uniprot
Uniprot	SI.CL.43.cl.4303.SiJWG03BDQR5C12.scf	SI.CL.43.cl.4303.SiJWG03BDQR5C12.scf		GO:0005554	SP:TBL2_HUMAN	IEA		F	NOT_ASSIGNED		transcript	taxon:13686	20060515	Uniprot
Uniprot	SI.CL.8.cl.867.Contig2	SI.CL.8.cl.867.Contig2		GO:0003755	SP:Q4SZQ5_TETNG	IEA		F	NOT_ASSIGNED		transcript	taxon:13686	20060515	Uniprot
Uniprot	SI.CL.8.cl.867.Contig2	SI.CL.8.cl.867.Contig2		GO:0016853	SP:Q4SZQ5_TETNG	IEA		F	NOT_ASSIGNED		transcript	taxon:13686	20060515	Uniprot
Uniprot	SI.CL.8.cl.867.Contig2	SI.CL.8.cl.867.Contig2		GO:0006457	SP:Q2VTP6_PIG	IEA		P	NOT_ASSIGNED		transcript	taxon:13686	20060515	Uniprot
Uniprot	SiJWB12CAO2.scf	SiJWB12CAO2.scf		GO:0005506	SP:TRF_BLADI	IEA		F	NOT_ASSIGNED		transcript	taxon:13686	20060515	Uniprot
Uniprot	SiJWB12CAO2.scf	SiJWB12CAO2.scf		GO:0008199	SP:TRF_BLADI	IEA		F	NOT_ASSIGNED		transcript	taxon:13686	20060515	Uniprot
Uniprot	SiJWB12CAO2.scf	SiJWB12CAO2.scf		GO:0046872	SP:TRF_BLADI	IEA		F	NOT_ASSIGNED		transcript	taxon:13686	20060515	Uniprot
Uniprot	SiJWB12CAO2.scf	SiJWB12CAO2.scf		GO:0006811	SP:TRF_BLADI	IEA		P	NOT_ASSIGNED		transcript	taxon:13686	20060515	Uniprot
Uniprot	SiJWB12CAO2.scf	SiJWB12CAO2.scf		GO:0006879	SP:TRF_BLADI	IEA		P	NOT_ASSIGNED		transcript	taxon:13686	20060515	Uniprot
Uniprot	SiJWB12CAO2.scf	SiJWB12CAO2.scf		GO:0006826	SP:TRF_BLADI	IEA		P	NOT_ASSIGNED		transcript	taxon:13686	20060515	Uniprot
Uniprot	SiJWB12CAO2.scf	SiJWB12CAO2.scf		GO:0005576	SP:TRF_BLADI	IEA		C	NOT_ASSIGNED		transcript	taxon:13686	20060515	Uniprot
Uniprot	SiJWB12CAO2.scf	SiJWB12CAO2.scf		GO:0006810	SP:TRF_BLADI	IEA		P	NOT_ASSIGNED		transcript	taxon:13686	20060515	Uniprot
Uniprot	SI.CL.2.cl.284.Contig1	SI.CL.2.cl.284.Contig1		GO:0000166	SP:NUBP2_HUMAN	IEA		F	NOT_ASSIGNED		transcript	taxon:13686	20060515	Uniprot
Uniprot	SI.CL.2.cl.284.Contig1	SI.CL.2.cl.284.Contig1		GO:0005524	SP:Q5ZKV4_CHICK	IEA		F	NOT_ASSIGNED		transcript	taxon:13686	20060515	Uniprot
Uniprot	SI.CL.2.cl.284.Contig1	SI.CL.2.cl.284.Contig1		GO:0005554	SP:Q5ZKV4_CHICK	IEA		F	NOT_ASSIGNED		transcript	taxon:13686	20060515	Uniprot
Uniprot	SI.CL.16.cl.1640.Contig1	SI.CL.16.cl.1640.Contig1		GO:0005634	SP:HEATR_HUMAN	IEA		C	NOT_ASSIGNED		transcript	taxon:13686	20060515	Uniprot
Uniprot	SI.CL.16.cl.1640.Contig1	SI.CL.16.cl.1640.Contig1		GO:0005488	SP:Q5T3Q7_HUMAN	IEA		F	NOT_ASSIGNED		transcript	taxon:13686	20060515	Uniprot
Uniprot	SI.CL.16.cl.1640.Contig1	SI.CL.16.cl.1640.Contig1		GO:0005515	SP:HEATR_HUMAN	IEA		F	NOT_ASSIGNED		transcript	taxon:13686	20060515	Uniprot
Uniprot	SiJWC12CAP.scf	SiJWC12CAP.scf		GO:0005488	SP:Q7Q8S6_ANOGA	IEA		F	NOT_ASSIGNED		transcript	taxon:13686	20060515	Uniprot
Uniprot	SiJWF09BAD.scf	SiJWF09BAD.scf		GO:0004114	SP:Q3SBD3_STRPU	IEA		F	NOT_ASSIGNED		transcript	taxon:13686	20060515	Uniprot
Uniprot	SiJWF09BAD.scf	SiJWF09BAD.scf		GO:0007165	SP:Q3SBD3_STRPU	IEA		P	NOT_ASSIGNED		transcript	taxon:13686	20060515	Uniprot
Uniprot	SiJWF09BAD.scf	SiJWF09BAD.scf		GO:0003824	SP:Q3SBD3_STRPU	IEA		F	NOT_ASSIGNED		transcript	taxon:13686	20060515	Uniprot
Uniprot	SI.CL.29.cl.2907.Contig1	SI.CL.29.cl.2907.Contig1		GO:0006412	SP:Q5F3X4_CHICK	IEA		P	NOT_ASSIGNED		transcript	taxon:13686	20060515	Uniprot
Uniprot	SI.CL.29.cl.2907.Contig1	SI.CL.29.cl.2907.Contig1		GO:0008380	SP:U5S1_HUMAN	IEA		P	NOT_ASSIGNED		transcript	taxon:13686	20060515	Uniprot
Uniprot	SI.CL.29.cl.2907.Contig1	SI.CL.29.cl.2907.Contig1		GO:0005681	SP:U5S1_HUMAN	IEA		C	NOT_ASSIGNED		transcript	taxon:13686	20060515	Uniprot
Uniprot	SI.CL.29.cl.2907.Contig1	SI.CL.29.cl.2907.Contig1		GO:0005525	SP:Q5F3X4_CHICK	IEA		F	NOT_ASSIGNED		transcript	taxon:13686	20060515	Uniprot
Uniprot	SI.CL.29.cl.2907.Contig1	SI.CL.29.cl.2907.Contig1		GO:0000166	SP:U5S1_HUMAN	IEA		F	NOT_ASSIGNED		transcript	taxon:13686	20060515	Uniprot
Uniprot	SI.CL.29.cl.2907.Contig1	SI.CL.29.cl.2907.Contig1		GO:0005515	SP:U5S1_HUMAN	IEA		F	NOT_ASSIGNED		transcript	taxon:13686	20060515	Uniprot
Uniprot	SI.CL.29.cl.2907.Contig1	SI.CL.29.cl.2907.Contig1		GO:0000398	SP:U5S1_HUMAN	IEA		P	NOT_ASSIGNED		transcript	taxon:13686	20060515	Uniprot
Uniprot	SI.CL.29.cl.2907.Contig1	SI.CL.29.cl.2907.Contig1		GO:0003924	SP:U5S1_HUMAN	IEA		F	NOT_ASSIGNED		transcript	taxon:13686	20060515	Uniprot
Uniprot	SI.CL.40.cl.4037.Contig1	SI.CL.40.cl.4037.Contig1		GO:0005744	SP:RM45_BOVIN	IEA		C	NOT_ASSIGNED		transcript	taxon:13686	20060515	Uniprot
Uniprot	SI.CL.40.cl.4037.Contig1	SI.CL.40.cl.4037.Contig1		GO:0005739	SP:RM45_BOVIN	IEA		C	NOT_ASSIGNED		transcript	taxon:13686	20060515	Uniprot
Uniprot	SI.CL.40.cl.4037.Contig1	SI.CL.40.cl.4037.Contig1		GO:0015450	SP:RM45_BOVIN	IEA		F	NOT_ASSIGNED		transcript	taxon:13686	20060515	Uniprot
Uniprot	SI.CL.40.cl.4037.Contig1	SI.CL.40.cl.4037.Contig1		GO:0006412	SP:RM45_HUMAN	IEA		P	NOT_ASSIGNED		transcript	taxon:13686	20060515	Uniprot
Uniprot	SI.CL.40.cl.4037.Contig1	SI.CL.40.cl.4037.Contig1		GO:0030529	SP:RM45_BOVIN	IEA		C	NOT_ASSIGNED		transcript	taxon:13686	20060515	Uniprot
Uniprot	SI.CL.40.cl.4037.Contig1	SI.CL.40.cl.4037.Contig1		GO:0003735	SP:RM45_HUMAN	IEA		F	NOT_ASSIGNED		transcript	taxon:13686	20060515	Uniprot
Uniprot	SI.CL.40.cl.4037.Contig1	SI.CL.40.cl.4037.Contig1		GO:0006886	SP:RM45_BOVIN	IEA		P	NOT_ASSIGNED		transcript	taxon:13686	20060515	Uniprot
Uniprot	SI.CL.4.cl.410.Contig1	SI.CL.4.cl.410.Contig1		GO:0003714	SP:O95367_HUMAN	IEA		F	NOT_ASSIGNED		transcript	taxon:13686	20060515	Uniprot
Uniprot	SI.CL.4.cl.410.Contig1	SI.CL.4.cl.410.Contig1		GO:0003700	SP:O95367_HUMAN	IEA		F	NOT_ASSIGNED		transcript	taxon:13686	20060515	Uniprot
Uniprot	SiJWH12BBT.scf	SiJWH12BBT.scf		GO:0004871	SP:Q4SI06_TETNG	IEA		F	NOT_ASSIGNED		transcript	taxon:13686	20060515	Uniprot
Uniprot	SiJWH12BBT.scf	SiJWH12BBT.scf		GO:0016020	SP:ARL6_HUMAN	IEA		C	NOT_ASSIGNED		transcript	taxon:13686	20060515	Uniprot
Uniprot	SiJWH12BBT.scf	SiJWH12BBT.scf		GO:0007186	SP:Q4SI06_TETNG	IEA		P	NOT_ASSIGNED		transcript	taxon:13686	20060515	Uniprot
Uniprot	SiJWH12BBT.scf	SiJWH12BBT.scf		GO:0007046	SP:Q4T462_TETNG	IEA		P	NOT_ASSIGNED		transcript	taxon:13686	20060515	Uniprot
Uniprot	SiJWH12BBT.scf	SiJWH12BBT.scf		GO:0006364	SP:ARL6_HUMAN	IEA		P	NOT_ASSIGNED		transcript	taxon:13686	20060515	Uniprot
Uniprot	SiJWH12BBT.scf	SiJWH12BBT.scf		GO:0005525	SP:ARL6_HUMAN	IEA		F	NOT_ASSIGNED		transcript	taxon:13686	20060515	Uniprot
Uniprot	SiJWH12BBT.scf	SiJWH12BBT.scf		GO:0000166	SP:ARL6_HUMAN	IEA		F	NOT_ASSIGNED		transcript	taxon:13686	20060515	Uniprot
Uniprot	SiJWH12BBT.scf	SiJWH12BBT.scf		GO:0007264	SP:ARL6_HUMAN	IEA		P	NOT_ASSIGNED		transcript	taxon:13686	20060515	Uniprot
Uniprot	SiJWH12BBT.scf	SiJWH12BBT.scf		GO:0005515	SP:ARL6_HUMAN	IEA		F	NOT_ASSIGNED		transcript	taxon:13686	20060515	Uniprot
Uniprot	SiJWH12BBT.scf	SiJWH12BBT.scf		GO:0005737	SP:ARL6_HUMAN	IEA		C	NOT_ASSIGNED		transcript	taxon:13686	20060515	Uniprot
Uniprot	SiJWH12BBT.scf	SiJWH12BBT.scf		GO:0019001	SP:Q4SI06_TETNG	IEA		F	NOT_ASSIGNED		transcript	taxon:13686	20060515	Uniprot
Uniprot	SiJWH12BBT.scf	SiJWH12BBT.scf		GO:0005622	SP:Q4T462_TETNG	IEA		C	NOT_ASSIGNED		transcript	taxon:13686	20060515	Uniprot
Uniprot	SI.CL.40.cl.4038.Contig1	SI.CL.40.cl.4038.Contig1		GO:0006412	SP:EF1G_ARTSA	IEA		P	NOT_ASSIGNED		transcript	taxon:13686	20060515	Uniprot
Uniprot	SI.CL.40.cl.4038.Contig1	SI.CL.40.cl.4038.Contig1		GO:0003746	SP:Q3SZV3_BOVIN	IEA		F	NOT_ASSIGNED		transcript	taxon:13686	20060515	Uniprot
Uniprot	SI.CL.40.cl.4038.Contig1	SI.CL.40.cl.4038.Contig1		GO:0005853	SP:Q3SZV3_BOVIN	IEA		C	NOT_ASSIGNED		transcript	taxon:13686	20060515	Uniprot
Uniprot	SI.CL.40.cl.4038.Contig1	SI.CL.40.cl.4038.Contig1		GO:0006414	SP:Q3SZV3_BOVIN	IEA		P	NOT_ASSIGNED		transcript	taxon:13686	20060515	Uniprot
Uniprot	SI.CL.23.cl.2338.Contig2	SI.CL.23.cl.2338.Contig2		GO:0019028	SP:Q77DQ0_9VIRU	IEA		C	NOT_ASSIGNED		transcript	taxon:13686	20060515	Uniprot
Uniprot	SI.CL.23.cl.2338.Contig2	SI.CL.23.cl.2338.Contig2		GO:0005198	SP:Q77DQ0_9VIRU	IEA		F	NOT_ASSIGNED		transcript	taxon:13686	20060515	Uniprot
Uniprot	SiJWC11BCW2.scf	SiJWC11BCW2.scf		GO:0016020	SP:Q7Q8X0_ANOGA	IEA		C	NOT_ASSIGNED		transcript	taxon:13686	20060515	Uniprot
Uniprot	SiJWC11BCW2.scf	SiJWC11BCW2.scf		GO:0005215	SP:Q7Q8X0_ANOGA	IEA		F	NOT_ASSIGNED		transcript	taxon:13686	20060515	Uniprot
Uniprot	SiJWC11BCW2.scf	SiJWC11BCW2.scf		GO:0016021	SP:Q7Q8X0_ANOGA	IEA		C	NOT_ASSIGNED		transcript	taxon:13686	20060515	Uniprot
Uniprot	SiJWC11BCW2.scf	SiJWC11BCW2.scf		GO:0006810	SP:Q7Q8X0_ANOGA	IEA		P	NOT_ASSIGNED		transcript	taxon:13686	20060515	Uniprot
Uniprot	SI.CL.4.cl.468.Contig1	SI.CL.4.cl.468.Contig1		GO:0006412	SP:Q4LAY0_9COLE	IEA		P	NOT_ASSIGNED		transcript	taxon:13686	20060515	Uniprot
Uniprot	SI.CL.4.cl.468.Contig1	SI.CL.4.cl.468.Contig1		GO:0005840	SP:Q4LAY0_9COLE	IEA		C	NOT_ASSIGNED		transcript	taxon:13686	20060515	Uniprot
Uniprot	SI.CL.4.cl.468.Contig1	SI.CL.4.cl.468.Contig1		GO:0030529	SP:RS29_SPOFR	IEA		C	NOT_ASSIGNED		transcript	taxon:13686	20060515	Uniprot
Uniprot	SI.CL.4.cl.468.Contig1	SI.CL.4.cl.468.Contig1		GO:0003735	SP:Q4LAY0_9COLE	IEA		F	NOT_ASSIGNED		transcript	taxon:13686	20060515	Uniprot
Uniprot	SI.CL.4.cl.468.Contig1	SI.CL.4.cl.468.Contig1		GO:0005622	SP:Q4LAY0_9COLE	IEA		C	NOT_ASSIGNED		transcript	taxon:13686	20060515	Uniprot
Uniprot	SI.CL.3.cl.321.Contig2	SI.CL.3.cl.321.Contig2		GO:0019752	SP:Q4QQH9_HUMAN	IEA		P	NOT_ASSIGNED		transcript	taxon:13686	20060515	Uniprot
Uniprot	SI.CL.3.cl.321.Contig2	SI.CL.3.cl.321.Contig2		GO:0016831	SP:Q4QQH9_HUMAN	IEA		F	NOT_ASSIGNED		transcript	taxon:13686	20060515	Uniprot
Uniprot	SI.CL.3.cl.321.Contig2	SI.CL.3.cl.321.Contig2		GO:0016829	SP:Q4QQH9_HUMAN	IEA		F	NOT_ASSIGNED		transcript	taxon:13686	20060515	Uniprot
Uniprot	SI.CL.3.cl.321.Contig2	SI.CL.3.cl.321.Contig2		GO:0004351	SP:Q9DG87_CARAU	IEA		F	NOT_ASSIGNED		transcript	taxon:13686	20060515	Uniprot
Uniprot	SiJWA02ACK.scf	SiJWA02ACK.scf		GO:0009893	SP:PIGA_HUMAN	IEA		P	NOT_ASSIGNED		transcript	taxon:13686	20060515	Uniprot
Uniprot	SiJWA02ACK.scf	SiJWA02ACK.scf		GO:0016020	SP:PIGA_HUMAN	IEA		C	NOT_ASSIGNED		transcript	taxon:13686	20060515	Uniprot
Uniprot	SiJWA02ACK.scf	SiJWA02ACK.scf		GO:0006506	SP:PIGA_HUMAN	IEA		P	NOT_ASSIGNED		transcript	taxon:13686	20060515	Uniprot
Uniprot	SiJWA02ACK.scf	SiJWA02ACK.scf		GO:0016021	SP:PIGA_HUMAN	IEA		C	NOT_ASSIGNED		transcript	taxon:13686	20060515	Uniprot
Uniprot	SiJWA02ACK.scf	SiJWA02ACK.scf		GO:0016757	SP:PIGA_HUMAN	IEA		F	NOT_ASSIGNED		transcript	taxon:13686	20060515	Uniprot
Uniprot	SiJWA02ACK.scf	SiJWA02ACK.scf		GO:0017176	SP:PIGA_HUMAN	IEA		F	NOT_ASSIGNED		transcript	taxon:13686	20060515	Uniprot
Uniprot	SiJWA02ACK.scf	SiJWA02ACK.scf		GO:0005515	SP:PIGA_HUMAN	IEA		F	NOT_ASSIGNED		transcript	taxon:13686	20060515	Uniprot
Uniprot	SiJWA02ACK.scf	SiJWA02ACK.scf		GO:0009058	SP:Q5F4C8_CHICK	IEA		P	NOT_ASSIGNED		transcript	taxon:13686	20060515	Uniprot
Uniprot	SiJWA02ACK.scf	SiJWA02ACK.scf		GO:0000506	SP:PIGA_HUMAN	IEA		C	NOT_ASSIGNED		transcript	taxon:13686	20060515	Uniprot
Uniprot	SiJWA02ACK.scf	SiJWA02ACK.scf		GO:0005789	SP:PIGA_HUMAN	IEA		C	NOT_ASSIGNED		transcript	taxon:13686	20060515	Uniprot
Uniprot	SI.CL.38.cl.3849.Contig1	SI.CL.38.cl.3849.Contig1		GO:0005739	SP:TIM23_HUMAN	IEA		C	NOT_ASSIGNED		transcript	taxon:13686	20060515	Uniprot
Uniprot	SI.CL.38.cl.3849.Contig1	SI.CL.38.cl.3849.Contig1		GO:0005744	SP:Q5SRD1_HUMAN	IEA		C	NOT_ASSIGNED		transcript	taxon:13686	20060515	Uniprot
Uniprot	SI.CL.38.cl.3849.Contig1	SI.CL.38.cl.3849.Contig1		GO:0008565	SP:Q4SL80_TETNG	IEA		F	NOT_ASSIGNED		transcript	taxon:13686	20060515	Uniprot
Uniprot	SI.CL.38.cl.3849.Contig1	SI.CL.38.cl.3849.Contig1		GO:0005758	SP:TIM23_HUMAN	IEA		C	NOT_ASSIGNED		transcript	taxon:13686	20060515	Uniprot
Uniprot	SI.CL.38.cl.3849.Contig1	SI.CL.38.cl.3849.Contig1		GO:0015031	SP:Q4SL80_TETNG	IEA		P	NOT_ASSIGNED		transcript	taxon:13686	20060515	Uniprot
Uniprot	SI.CL.38.cl.3849.Contig1	SI.CL.38.cl.3849.Contig1		GO:0005743	SP:Q4SL80_TETNG	IEA		C	NOT_ASSIGNED		transcript	taxon:13686	20060515	Uniprot
Uniprot	SI.CL.38.cl.3849.Contig1	SI.CL.38.cl.3849.Contig1		GO:0015450	SP:Q5SRD1_HUMAN	IEA		F	NOT_ASSIGNED		transcript	taxon:13686	20060515	Uniprot
Uniprot	SI.CL.38.cl.3849.Contig1	SI.CL.38.cl.3849.Contig1		GO:0006626	SP:TIM23_HUMAN	IEA		P	NOT_ASSIGNED		transcript	taxon:13686	20060515	Uniprot
Uniprot	SI.CL.38.cl.3849.Contig1	SI.CL.38.cl.3849.Contig1		GO:0005887	SP:TIM23_HUMAN	IEA		C	NOT_ASSIGNED		transcript	taxon:13686	20060515	Uniprot
Uniprot	SI.CL.38.cl.3849.Contig1	SI.CL.38.cl.3849.Contig1		GO:0005515	SP:TIM23_HUMAN	IEA		F	NOT_ASSIGNED		transcript	taxon:13686	20060515	Uniprot
Uniprot	SI.CL.38.cl.3849.Contig1	SI.CL.38.cl.3849.Contig1		GO:0019867	SP:TIM23_HUMAN	IEA		C	NOT_ASSIGNED		transcript	taxon:13686	20060515	Uniprot
Uniprot	SI.CL.38.cl.3849.Contig1	SI.CL.38.cl.3849.Contig1		GO:0006886	SP:Q5SRD1_HUMAN	IEA		P	NOT_ASSIGNED		transcript	taxon:13686	20060515	Uniprot
Uniprot	SiJWD06BDF.scf	SiJWD06BDF.scf		GO:0005634	SP:DYXC1_HUMAN	IEA		C	NOT_ASSIGNED		transcript	taxon:13686	20060515	Uniprot
Uniprot	SiJWD06BDF.scf	SiJWD06BDF.scf		GO:0005488	SP:Q5QIE2_CHICK	IEA		F	NOT_ASSIGNED		transcript	taxon:13686	20060515	Uniprot
Uniprot	SiJWA07BAA2.scf	SiJWA07BAA2.scf		GO:0016787	SP:GCP_XENLA	IEA		F	NOT_ASSIGNED		transcript	taxon:13686	20060515	Uniprot
Uniprot	SiJWA07BAA2.scf	SiJWA07BAA2.scf		GO:0046872	SP:GCP_HUMAN	IEA		F	NOT_ASSIGNED		transcript	taxon:13686	20060515	Uniprot
Uniprot	SiJWA07BAA2.scf	SiJWA07BAA2.scf		GO:0008233	SP:GCP_XENLA	IEA		F	NOT_ASSIGNED		transcript	taxon:13686	20060515	Uniprot
Uniprot	SiJWA07BAA2.scf	SiJWA07BAA2.scf		GO:0008270	SP:GCP_HUMAN	IEA		F	NOT_ASSIGNED		transcript	taxon:13686	20060515	Uniprot
Uniprot	SiJWA07BAA2.scf	SiJWA07BAA2.scf		GO:0006508	SP:GCP_HUMAN	IEA		P	NOT_ASSIGNED		transcript	taxon:13686	20060515	Uniprot
Uniprot	SiJWA07BAA2.scf	SiJWA07BAA2.scf		GO:0008237	SP:GCP_HUMAN	IEA		F	NOT_ASSIGNED		transcript	taxon:13686	20060515	Uniprot
Uniprot	SiJWA07BAA2.scf	SiJWA07BAA2.scf		GO:0008450	SP:GCP_HUMAN	IEA		F	NOT_ASSIGNED		transcript	taxon:13686	20060515	Uniprot
Uniprot	SI.CL.12.cl.1261.Contig1	SI.CL.12.cl.1261.Contig1		GO:0005634	SP:WDR13_HUMAN	IEA		C	NOT_ASSIGNED		transcript	taxon:13686	20060515	Uniprot
Uniprot	SI.CL.27.cl.2796.Contig1	SI.CL.27.cl.2796.Contig1		GO:0006044	SP:NAGK_HUMAN	IEA		P	NOT_ASSIGNED		transcript	taxon:13686	20060515	Uniprot
Uniprot	SI.CL.27.cl.2796.Contig1	SI.CL.27.cl.2796.Contig1		GO:0000166	SP:NAGK_HUMAN	IEA		F	NOT_ASSIGNED		transcript	taxon:13686	20060515	Uniprot
Uniprot	SI.CL.27.cl.2796.Contig1	SI.CL.27.cl.2796.Contig1		GO:0006051	SP:NAGK_HUMAN	IEA		P	NOT_ASSIGNED		transcript	taxon:13686	20060515	Uniprot
Uniprot	SI.CL.27.cl.2796.Contig1	SI.CL.27.cl.2796.Contig1		GO:0005524	SP:NAGK_HUMAN	IEA		F	NOT_ASSIGNED		transcript	taxon:13686	20060515	Uniprot
Uniprot	SI.CL.27.cl.2796.Contig1	SI.CL.27.cl.2796.Contig1		GO:0045127	SP:NAGK_HUMAN	IEA		F	NOT_ASSIGNED		transcript	taxon:13686	20060515	Uniprot
Uniprot	SI.CL.27.cl.2796.Contig1	SI.CL.27.cl.2796.Contig1		GO:0016301	SP:Q3SZM9_BOVIN	IEA		F	NOT_ASSIGNED		transcript	taxon:13686	20060515	Uniprot
Uniprot	SI.CL.27.cl.2796.Contig1	SI.CL.27.cl.2796.Contig1		GO:0005515	SP:NAGK_HUMAN	IEA		F	NOT_ASSIGNED		transcript	taxon:13686	20060515	Uniprot
Uniprot	SI.CL.27.cl.2796.Contig1	SI.CL.27.cl.2796.Contig1		GO:0016740	SP:NAGK_HUMAN	IEA		F	NOT_ASSIGNED		transcript	taxon:13686	20060515	Uniprot
Uniprot	SiJWA06CAO2.scf	SiJWA06CAO2.scf		GO:0007242	SP:Q6PGP3_HUMAN	IEA		P	NOT_ASSIGNED		transcript	taxon:13686	20060515	Uniprot
Uniprot	SiJWA06CAO2.scf	SiJWA06CAO2.scf		GO:0005515	SP:Q6PGP3_HUMAN	IEA		F	NOT_ASSIGNED		transcript	taxon:13686	20060515	Uniprot
Uniprot	SiJWA06CAO2.scf	SiJWA06CAO2.scf		GO:0035091	SP:Q6PGP3_HUMAN	IEA		F	NOT_ASSIGNED		transcript	taxon:13686	20060515	Uniprot
Uniprot	SiJWH05BAX.scf	SiJWH05BAX.scf		GO:0005856	SP:DCTN5_HUMAN	IEA		C	NOT_ASSIGNED		transcript	taxon:13686	20060515	Uniprot
Uniprot	SiJWE07BBX.scf	SiJWE07BBX.scf		GO:0016831	SP:DCOR_PANRE	IEA		F	NOT_ASSIGNED		transcript	taxon:13686	20060515	Uniprot
Uniprot	SiJWE07BBX.scf	SiJWE07BBX.scf		GO:0016829	SP:Q27702_MUSDO	IEA		F	NOT_ASSIGNED		transcript	taxon:13686	20060515	Uniprot
Uniprot	SiJWE07BBX.scf	SiJWE07BBX.scf		GO:0006596	SP:Q27702_MUSDO	IEA		P	NOT_ASSIGNED		transcript	taxon:13686	20060515	Uniprot
Uniprot	SiJWE07BBX.scf	SiJWE07BBX.scf		GO:0004586	SP:Q27702_MUSDO	IEA		F	NOT_ASSIGNED		transcript	taxon:13686	20060515	Uniprot
Uniprot	SiJWE07BBX.scf	SiJWE07BBX.scf		GO:0003824	SP:Q27702_MUSDO	IEA		F	NOT_ASSIGNED		transcript	taxon:13686	20060515	Uniprot
Uniprot	SiJWF04BAS.scf	SiJWF04BAS.scf		GO:0005509	SP:Q6PKY8_ASPFU	IEA		F	NOT_ASSIGNED		transcript	taxon:13686	20060515	Uniprot
Uniprot	SiJWF04BAS.scf	SiJWF04BAS.scf		GO:0007417	SP:ATN1_HUMAN	IEA		P	NOT_ASSIGNED		transcript	taxon:13686	20060515	Uniprot
Uniprot	SiJWF04BAS.scf	SiJWF04BAS.scf		GO:0009664	SP:Q09084_LYCES	IEA		P	NOT_ASSIGNED		transcript	taxon:13686	20060515	Uniprot
Uniprot	SiJWF04BAS.scf	SiJWF04BAS.scf		GO:0005199	SP:Q09084_LYCES	IEA		F	NOT_ASSIGNED		transcript	taxon:13686	20060515	Uniprot
Uniprot	SiJWF04BAS.scf	SiJWF04BAS.scf		GO:0004674	SP:Q5YQM2_NOCFA	IEA		F	NOT_ASSIGNED		transcript	taxon:13686	20060515	Uniprot
Uniprot	SiJWF04BAS.scf	SiJWF04BAS.scf		GO:0000166	SP:Q5YQM2_NOCFA	IEA		F	NOT_ASSIGNED		transcript	taxon:13686	20060515	Uniprot
Uniprot	SiJWF04BAS.scf	SiJWF04BAS.scf		GO:0003677	SP:Q7PYL4_ANOGA	IEA		F	NOT_ASSIGNED		transcript	taxon:13686	20060515	Uniprot
Uniprot	SiJWF04BAS.scf	SiJWF04BAS.scf		GO:0016301	SP:Q5YQM2_NOCFA	IEA		F	NOT_ASSIGNED		transcript	taxon:13686	20060515	Uniprot
Uniprot	SiJWF04BAS.scf	SiJWF04BAS.scf		GO:0005515	SP:ATN1_HUMAN	IEA		F	NOT_ASSIGNED		transcript	taxon:13686	20060515	Uniprot
Uniprot	SiJWF04BAS.scf	SiJWF04BAS.scf		GO:0005737	SP:ATN1_HUMAN	IEA		C	NOT_ASSIGNED		transcript	taxon:13686	20060515	Uniprot
Uniprot	SiJWF04BAS.scf	SiJWF04BAS.scf		GO:0005544	SP:Q6PKY8_ASPFU	IEA		F	NOT_ASSIGNED		transcript	taxon:13686	20060515	Uniprot
Uniprot	SiJWF04BAS.scf	SiJWF04BAS.scf		GO:0004672	SP:Q5YQM2_NOCFA	IEA		F	NOT_ASSIGNED		transcript	taxon:13686	20060515	Uniprot
Uniprot	SiJWF04BAS.scf	SiJWF04BAS.scf		GO:0006355	SP:Q7PYL4_ANOGA	IEA		P	NOT_ASSIGNED		transcript	taxon:13686	20060515	Uniprot
Uniprot	SiJWF04BAS.scf	SiJWF04BAS.scf		GO:0016740	SP:Q5YQM2_NOCFA	IEA		F	NOT_ASSIGNED		transcript	taxon:13686	20060515	Uniprot
Uniprot	SiJWF04BAS.scf	SiJWF04BAS.scf		GO:0005634	SP:ATN1_HUMAN	IEA		C	NOT_ASSIGNED		transcript	taxon:13686	20060515	Uniprot
Uniprot	SiJWF04BAS.scf	SiJWF04BAS.scf		GO:0009928	SP:Q09084_LYCES	IEA		C	NOT_ASSIGNED		transcript	taxon:13686	20060515	Uniprot
Uniprot	SiJWF04BAS.scf	SiJWF04BAS.scf		GO:0005524	SP:Q5YQM2_NOCFA	IEA		F	NOT_ASSIGNED		transcript	taxon:13686	20060515	Uniprot
Uniprot	SiJWF04BAS.scf	SiJWF04BAS.scf		GO:0006468	SP:Q5YQM2_NOCFA	IEA		P	NOT_ASSIGNED		transcript	taxon:13686	20060515	Uniprot
Uniprot	SiJWB12ADS.scf	SiJWB12ADS.scf		GO:0003883	SP:Q5F3Z1_CHICK	IEA		F	NOT_ASSIGNED		transcript	taxon:13686	20060515	Uniprot
Uniprot	SiJWB12ADS.scf	SiJWB12ADS.scf		GO:0006221	SP:Q5F3Z1_CHICK	IEA		P	NOT_ASSIGNED		transcript	taxon:13686	20060515	Uniprot
Uniprot	SiJWB12ADS.scf	SiJWB12ADS.scf		GO:0003824	SP:Q2M197_DROPS	IEA		F	NOT_ASSIGNED		transcript	taxon:13686	20060515	Uniprot
Uniprot	SiJWB12ADS.scf	SiJWB12ADS.scf		GO:0016874	SP:Q5F3Z1_CHICK	IEA		F	NOT_ASSIGNED		transcript	taxon:13686	20060515	Uniprot
Uniprot	SI.CL.15.cl.1530.Contig1	SI.CL.15.cl.1530.Contig1		GO:0005344	SP:HEXA_BLADI	IEA		F	NOT_ASSIGNED		transcript	taxon:13686	20060515	Uniprot
Uniprot	SI.CL.15.cl.1530.Contig1	SI.CL.15.cl.1530.Contig1		GO:0005488	SP:Q7PXY7_ANOGA	IEA		F	NOT_ASSIGNED		transcript	taxon:13686	20060515	Uniprot
Uniprot	SI.CL.15.cl.1530.Contig1	SI.CL.15.cl.1530.Contig1		GO:0045735	SP:HEXA_BLADI	IEA		F	NOT_ASSIGNED		transcript	taxon:13686	20060515	Uniprot
Uniprot	SI.CL.15.cl.1530.Contig1	SI.CL.15.cl.1530.Contig1		GO:0006810	SP:HEXA_BLADI	IEA		P	NOT_ASSIGNED		transcript	taxon:13686	20060515	Uniprot
Uniprot	SiJWE02BCS2.scf	SiJWE02BCS2.scf		GO:0004197	SP:UBP30_HUMAN	IEA		F	NOT_ASSIGNED		transcript	taxon:13686	20060515	Uniprot
Uniprot	SiJWE02BCS2.scf	SiJWE02BCS2.scf		GO:0004221	SP:UBP30_HUMAN	IEA		F	NOT_ASSIGNED		transcript	taxon:13686	20060515	Uniprot
Uniprot	SiJWE02BCS2.scf	SiJWE02BCS2.scf		GO:0006511	SP:UBP30_HUMAN	IEA		P	NOT_ASSIGNED		transcript	taxon:13686	20060515	Uniprot
Uniprot	SiJWE02BCS2.scf	SiJWE02BCS2.scf		GO:0006512	SP:UBP30_HUMAN	IEA		P	NOT_ASSIGNED		transcript	taxon:13686	20060515	Uniprot
Uniprot	SI.CL.21.cl.2140.Contig1	SI.CL.21.cl.2140.Contig1		GO:0048037	SP:FAS_BOVIN	IEA		F	NOT_ASSIGNED		transcript	taxon:13686	20060515	Uniprot
Uniprot	SI.CL.21.cl.2140.Contig1	SI.CL.21.cl.2140.Contig1		GO:0004312	SP:FAS_ANSAN	IEA		F	NOT_ASSIGNED		transcript	taxon:13686	20060515	Uniprot
Uniprot	SI.CL.21.cl.2140.Contig1	SI.CL.21.cl.2140.Contig1		GO:0031177	SP:FAS_BOVIN	IEA		F	NOT_ASSIGNED		transcript	taxon:13686	20060515	Uniprot
Uniprot	SI.CL.21.cl.2140.Contig1	SI.CL.21.cl.2140.Contig1		GO:0016787	SP:FAS_ANSAN	IEA		F	NOT_ASSIGNED		transcript	taxon:13686	20060515	Uniprot
Uniprot	SI.CL.21.cl.2140.Contig1	SI.CL.21.cl.2140.Contig1		GO:0005515	SP:FAS_HUMAN	IEA		F	NOT_ASSIGNED		transcript	taxon:13686	20060515	Uniprot
Uniprot	SI.CL.21.cl.2140.Contig1	SI.CL.21.cl.2140.Contig1		GO:0006633	SP:FAS_BOVIN	IEA		P	NOT_ASSIGNED		transcript	taxon:13686	20060515	Uniprot
Uniprot	SI.CL.21.cl.2140.Contig1	SI.CL.21.cl.2140.Contig1		GO:0004313	SP:FAS_BOVIN	IEA		F	NOT_ASSIGNED		transcript	taxon:13686	20060515	Uniprot
Uniprot	SI.CL.21.cl.2140.Contig1	SI.CL.21.cl.2140.Contig1		GO:0004315	SP:FAS_BOVIN	IEA		F	NOT_ASSIGNED		transcript	taxon:13686	20060515	Uniprot
Uniprot	SI.CL.21.cl.2140.Contig1	SI.CL.21.cl.2140.Contig1		GO:0003824	SP:FAS_ANSAN	IEA		F	NOT_ASSIGNED		transcript	taxon:13686	20060515	Uniprot
Uniprot	SI.CL.21.cl.2140.Contig1	SI.CL.21.cl.2140.Contig1		GO:0019901	SP:FAS_HUMAN	IEA		F	NOT_ASSIGNED		transcript	taxon:13686	20060515	Uniprot
Uniprot	SI.CL.21.cl.2140.Contig1	SI.CL.21.cl.2140.Contig1		GO:0016740	SP:FAS_BOVIN	IEA		F	NOT_ASSIGNED		transcript	taxon:13686	20060515	Uniprot
Uniprot	SI.CL.21.cl.2140.Contig1	SI.CL.21.cl.2140.Contig1		GO:0016788	SP:FAS_BOVIN	IEA		F	NOT_ASSIGNED		transcript	taxon:13686	20060515	Uniprot
Uniprot	SI.CL.21.cl.2140.Contig1	SI.CL.21.cl.2140.Contig1		GO:0016829	SP:FAS_BOVIN	IEA		F	NOT_ASSIGNED		transcript	taxon:13686	20060515	Uniprot
Uniprot	SI.CL.21.cl.2140.Contig1	SI.CL.21.cl.2140.Contig1		GO:0008152	SP:Q58G70_PIG	IEA		P	NOT_ASSIGNED		transcript	taxon:13686	20060515	Uniprot
Uniprot	SI.CL.21.cl.2140.Contig1	SI.CL.21.cl.2140.Contig1		GO:0016491	SP:FAS_BOVIN	IEA		F	NOT_ASSIGNED		transcript	taxon:13686	20060515	Uniprot
Uniprot	SI.CL.21.cl.2140.Contig1	SI.CL.21.cl.2140.Contig1		GO:0016874	SP:FAS_ANSAN	IEA		F	NOT_ASSIGNED		transcript	taxon:13686	20060515	Uniprot
Uniprot	SI.CL.21.cl.2140.Contig1	SI.CL.21.cl.2140.Contig1		GO:0008757	SP:Q4LE83_HUMAN	IEA		F	NOT_ASSIGNED		transcript	taxon:13686	20060515	Uniprot
Uniprot	SI.CL.21.cl.2140.Contig1	SI.CL.21.cl.2140.Contig1		GO:0008610	SP:FAS_ANSAN	IEA		P	NOT_ASSIGNED		transcript	taxon:13686	20060515	Uniprot
Uniprot	SI.CL.21.cl.2140.Contig1	SI.CL.21.cl.2140.Contig1		GO:0004320	SP:FAS_BOVIN	IEA		F	NOT_ASSIGNED		transcript	taxon:13686	20060515	Uniprot
Uniprot	SI.CL.21.cl.2140.Contig1	SI.CL.21.cl.2140.Contig1		GO:0004314	SP:FAS_BOVIN	IEA		F	NOT_ASSIGNED		transcript	taxon:13686	20060515	Uniprot
Uniprot	SI.CL.21.cl.2140.Contig1	SI.CL.21.cl.2140.Contig1		GO:0009058	SP:Q4LE83_HUMAN	IEA		P	NOT_ASSIGNED		transcript	taxon:13686	20060515	Uniprot
Uniprot	SI.CL.21.cl.2140.Contig1	SI.CL.21.cl.2140.Contig1		GO:0004319	SP:FAS_BOVIN	IEA		F	NOT_ASSIGNED		transcript	taxon:13686	20060515	Uniprot
Uniprot	SI.CL.21.cl.2140.Contig1	SI.CL.21.cl.2140.Contig1		GO:0004316	SP:FAS_BOVIN	IEA		F	NOT_ASSIGNED		transcript	taxon:13686	20060515	Uniprot
Uniprot	SI.CL.22.cl.2285.Contig1	SI.CL.22.cl.2285.Contig1		GO:0009311	SP:Q497D5_XENTR	IEA		P	NOT_ASSIGNED		transcript	taxon:13686	20060515	Uniprot
Uniprot	SI.CL.22.cl.2285.Contig1	SI.CL.22.cl.2285.Contig1		GO:0004573	SP:Q497D5_XENTR	IEA		F	NOT_ASSIGNED		transcript	taxon:13686	20060515	Uniprot
Uniprot	SiJWB02BAW2.scf	SiJWB02BAW2.scf		GO:0030018	SP:Q8WZ42_HUMAN	IEA		C	NOT_ASSIGNED		transcript	taxon:13686	20060515	Uniprot
Uniprot	SiJWB02BAW2.scf	SiJWB02BAW2.scf		GO:0046777	SP:Q8WZ42_HUMAN	IEA		P	NOT_ASSIGNED		transcript	taxon:13686	20060515	Uniprot
Uniprot	SiJWB02BAW2.scf	SiJWB02BAW2.scf		GO:0004674	SP:Q4U1Z6_HUMAN	IEA		F	NOT_ASSIGNED		transcript	taxon:13686	20060515	Uniprot
Uniprot	SiJWB02BAW2.scf	SiJWB02BAW2.scf		GO:0017022	SP:Q8WZ42_HUMAN	IEA		F	NOT_ASSIGNED		transcript	taxon:13686	20060515	Uniprot
Uniprot	SiJWB02BAW2.scf	SiJWB02BAW2.scf		GO:0030239	SP:Q8WZ42_HUMAN	IEA		P	NOT_ASSIGNED		transcript	taxon:13686	20060515	Uniprot
Uniprot	SiJWB02BAW2.scf	SiJWB02BAW2.scf		GO:0005515	SP:Q8WZ53_HUMAN	IEA		F	NOT_ASSIGNED		transcript	taxon:13686	20060515	Uniprot
Uniprot	SiJWB02BAW2.scf	SiJWB02BAW2.scf		GO:0005516	SP:Q8WZ42_HUMAN	IEA		F	NOT_ASSIGNED		transcript	taxon:13686	20060515	Uniprot
Uniprot	SiJWB02BAW2.scf	SiJWB02BAW2.scf		GO:0007067	SP:Q8WZ42_HUMAN	IEA		P	NOT_ASSIGNED		transcript	taxon:13686	20060515	Uniprot
Uniprot	SiJWB02BAW2.scf	SiJWB02BAW2.scf		GO:0016020	SP:Q4U1Z6_HUMAN	IEA		C	NOT_ASSIGNED		transcript	taxon:13686	20060515	Uniprot
Uniprot	SiJWB02BAW2.scf	SiJWB02BAW2.scf		GO:0051393	SP:Q8WZ42_HUMAN	IEA		F	NOT_ASSIGNED		transcript	taxon:13686	20060515	Uniprot
Uniprot	SiJWB02BAW2.scf	SiJWB02BAW2.scf		GO:0030016	SP:Q8WZ53_HUMAN	IEA		C	NOT_ASSIGNED		transcript	taxon:13686	20060515	Uniprot
Uniprot	SiJWB02BAW2.scf	SiJWB02BAW2.scf		GO:0005524	SP:Q4U1Z6_HUMAN	IEA		F	NOT_ASSIGNED		transcript	taxon:13686	20060515	Uniprot
Uniprot	SiJWB02BAW2.scf	SiJWB02BAW2.scf		GO:0006468	SP:Q4U1Z6_HUMAN	IEA		P	NOT_ASSIGNED		transcript	taxon:13686	20060515	Uniprot
Uniprot	SiJWB02BAW2.scf	SiJWB02BAW2.scf		GO:0004896	SP:Q4U1Z6_HUMAN	IEA		F	NOT_ASSIGNED		transcript	taxon:13686	20060515	Uniprot
Uniprot	SiJWB02BAW2.scf	SiJWB02BAW2.scf		GO:0006936	SP:Q8WZ42_HUMAN	IEA		P	NOT_ASSIGNED		transcript	taxon:13686	20060515	Uniprot
Uniprot	SiJWB02BAW2.scf	SiJWB02BAW2.scf		GO:0000794	SP:Q8WZ42_HUMAN	IEA		C	NOT_ASSIGNED		transcript	taxon:13686	20060515	Uniprot
Uniprot	SiJWB02BAW2.scf	SiJWB02BAW2.scf		GO:0042802	SP:Q8WZ42_HUMAN	IEA		F	NOT_ASSIGNED		transcript	taxon:13686	20060515	Uniprot
Uniprot	SI.CL.2.cl.234.Contig1	SI.CL.2.cl.234.Contig1		GO:0006412	SP:Q4GXA1_9COLE	IEA		P	NOT_ASSIGNED		transcript	taxon:13686	20060515	Uniprot
Uniprot	SI.CL.2.cl.234.Contig1	SI.CL.2.cl.234.Contig1		GO:0005840	SP:Q4GXA1_9COLE	IEA		C	NOT_ASSIGNED		transcript	taxon:13686	20060515	Uniprot
Uniprot	SI.CL.2.cl.234.Contig1	SI.CL.2.cl.234.Contig1		GO:0003735	SP:Q4GXA1_9COLE	IEA		F	NOT_ASSIGNED		transcript	taxon:13686	20060515	Uniprot
Uniprot	SI.CL.2.cl.234.Contig1	SI.CL.2.cl.234.Contig1		GO:0005622	SP:Q4GXA1_9COLE	IEA		C	NOT_ASSIGNED		transcript	taxon:13686	20060515	Uniprot
Uniprot	SI.CL.12.cl.1281.Contig1	SI.CL.12.cl.1281.Contig1		GO:0007049	SP:NAT6_HUMAN	IEA		P	NOT_ASSIGNED		transcript	taxon:13686	20060515	Uniprot
Uniprot	SI.CL.12.cl.1281.Contig1	SI.CL.12.cl.1281.Contig1		GO:0045786	SP:NAT6_HUMAN	IEA		P	NOT_ASSIGNED		transcript	taxon:13686	20060515	Uniprot
Uniprot	SI.CL.12.cl.1281.Contig1	SI.CL.12.cl.1281.Contig1		GO:0016740	SP:NAT6_HUMAN	IEA		F	NOT_ASSIGNED		transcript	taxon:13686	20060515	Uniprot
Uniprot	SI.CL.12.cl.1281.Contig1	SI.CL.12.cl.1281.Contig1		GO:0008415	SP:NAT6_HUMAN	IEA		F	NOT_ASSIGNED		transcript	taxon:13686	20060515	Uniprot
Uniprot	SI.CL.12.cl.1281.Contig1	SI.CL.12.cl.1281.Contig1		GO:0008080	SP:NAT6_HUMAN	IEA		F	NOT_ASSIGNED		transcript	taxon:13686	20060515	Uniprot
Uniprot	SiJWE04BDX.scf	SiJWE04BDX.scf		GO:0016020	SP:Q6A4M8_CHOPR	IEA		C	NOT_ASSIGNED		transcript	taxon:13686	20060515	Uniprot
Uniprot	SiJWE04BDX.scf	SiJWE04BDX.scf		GO:0016491	SP:Q6A4M8_CHOPR	IEA		F	NOT_ASSIGNED		transcript	taxon:13686	20060515	Uniprot
Uniprot	SiJWE04BDX.scf	SiJWE04BDX.scf		GO:0016021	SP:Q6A4M8_CHOPR	IEA		C	NOT_ASSIGNED		transcript	taxon:13686	20060515	Uniprot
Uniprot	SiJWE04BDX.scf	SiJWE04BDX.scf		GO:0005506	SP:Q6A4M8_CHOPR	IEA		F	NOT_ASSIGNED		transcript	taxon:13686	20060515	Uniprot
Uniprot	SiJWE04BDX.scf	SiJWE04BDX.scf		GO:0005783	SP:Q6A4M8_CHOPR	IEA		C	NOT_ASSIGNED		transcript	taxon:13686	20060515	Uniprot
Uniprot	SiJWE04BDX.scf	SiJWE04BDX.scf		GO:0004768	SP:Q6A4M8_CHOPR	IEA		F	NOT_ASSIGNED		transcript	taxon:13686	20060515	Uniprot
Uniprot	SiJWE04BDX.scf	SiJWE04BDX.scf		GO:0008610	SP:Q6A4M8_CHOPR	IEA		P	NOT_ASSIGNED		transcript	taxon:13686	20060515	Uniprot
Uniprot	SiJWE04BDX.scf	SiJWE04BDX.scf		GO:0006633	SP:Q6A4M8_CHOPR	IEA		P	NOT_ASSIGNED		transcript	taxon:13686	20060515	Uniprot
Uniprot	SiJWE04BDX.scf	SiJWE04BDX.scf		GO:0016717	SP:Q6A4M8_CHOPR	IEA		F	NOT_ASSIGNED		transcript	taxon:13686	20060515	Uniprot
Uniprot	SiJWA07BBU.scf	SiJWA07BBU.scf		GO:0005634	SP:VGLL4_HUMAN	IEA		C	NOT_ASSIGNED		transcript	taxon:13686	20060515	Uniprot
Uniprot	SiJWA07BBU.scf	SiJWA07BBU.scf		GO:0006350	SP:VGLL4_HUMAN	IEA		P	NOT_ASSIGNED		transcript	taxon:13686	20060515	Uniprot
Uniprot	SiJWA07BBU.scf	SiJWA07BBU.scf		GO:0006355	SP:VGLL4_HUMAN	IEA		P	NOT_ASSIGNED		transcript	taxon:13686	20060515	Uniprot
Uniprot	SI.CL.36.cl.3606.Contig1	SI.CL.36.cl.3606.Contig1		GO:0005739	SP:AFG32_HUMAN	IEA		C	NOT_ASSIGNED		transcript	taxon:13686	20060515	Uniprot
Uniprot	SI.CL.36.cl.3606.Contig1	SI.CL.36.cl.3606.Contig1		GO:0004222	SP:AFG32_HUMAN	IEA		F	NOT_ASSIGNED		transcript	taxon:13686	20060515	Uniprot
Uniprot	SI.CL.36.cl.3606.Contig1	SI.CL.36.cl.3606.Contig1		GO:0016020	SP:AFG32_HUMAN	IEA		C	NOT_ASSIGNED		transcript	taxon:13686	20060515	Uniprot
Uniprot	SI.CL.36.cl.3606.Contig1	SI.CL.36.cl.3606.Contig1		GO:0046872	SP:AFG32_HUMAN	IEA		F	NOT_ASSIGNED		transcript	taxon:13686	20060515	Uniprot
Uniprot	SI.CL.36.cl.3606.Contig1	SI.CL.36.cl.3606.Contig1		GO:0008233	SP:Q4TA12_TETNG	IEA		F	NOT_ASSIGNED		transcript	taxon:13686	20060515	Uniprot
Uniprot	SI.CL.36.cl.3606.Contig1	SI.CL.36.cl.3606.Contig1		GO:0017111	SP:AFG32_HUMAN	IEA		F	NOT_ASSIGNED		transcript	taxon:13686	20060515	Uniprot
Uniprot	SI.CL.36.cl.3606.Contig1	SI.CL.36.cl.3606.Contig1		GO:0008237	SP:Q4TA12_TETNG	IEA		F	NOT_ASSIGNED		transcript	taxon:13686	20060515	Uniprot
Uniprot	SI.CL.36.cl.3606.Contig1	SI.CL.36.cl.3606.Contig1		GO:0016021	SP:AFG32_HUMAN	IEA		C	NOT_ASSIGNED		transcript	taxon:13686	20060515	Uniprot
Uniprot	SI.CL.36.cl.3606.Contig1	SI.CL.36.cl.3606.Contig1		GO:0030163	SP:AFG32_HUMAN	IEA		P	NOT_ASSIGNED		transcript	taxon:13686	20060515	Uniprot
Uniprot	SI.CL.36.cl.3606.Contig1	SI.CL.36.cl.3606.Contig1		GO:0000166	SP:AFG32_HUMAN	IEA		F	NOT_ASSIGNED		transcript	taxon:13686	20060515	Uniprot
Uniprot	SI.CL.36.cl.3606.Contig1	SI.CL.36.cl.3606.Contig1		GO:0005524	SP:AFG32_HUMAN	IEA		F	NOT_ASSIGNED		transcript	taxon:13686	20060515	Uniprot
Uniprot	SI.CL.36.cl.3606.Contig1	SI.CL.36.cl.3606.Contig1		GO:0008270	SP:AFG32_HUMAN	IEA		F	NOT_ASSIGNED		transcript	taxon:13686	20060515	Uniprot
Uniprot	SI.CL.36.cl.3606.Contig1	SI.CL.36.cl.3606.Contig1		GO:0006508	SP:AFG32_HUMAN	IEA		P	NOT_ASSIGNED		transcript	taxon:13686	20060515	Uniprot
Uniprot	SI.CL.36.cl.3606.Contig1	SI.CL.36.cl.3606.Contig1		GO:0051082	SP:AFG32_HUMAN	IEA		F	NOT_ASSIGNED		transcript	taxon:13686	20060515	Uniprot
Uniprot	SiJWA02AAP.scf	SiJWA02AAP.scf		GO:0007601	SP:Q5ZII8_CHICK	IEA		P	NOT_ASSIGNED		transcript	taxon:13686	20060515	Uniprot
Uniprot	SiJWA02AAP.scf	SiJWA02AAP.scf		GO:0016021	SP:Q5ZII8_CHICK	IEA		C	NOT_ASSIGNED		transcript	taxon:13686	20060515	Uniprot
Uniprot	SI.CL.7.cl.777.SiJWC11ACM.scf	SI.CL.7.cl.777.SiJWC11ACM.scf		GO:0007517	SP:Q6IV29_ECHGR	IEA		P	NOT_ASSIGNED		transcript	taxon:13686	20060515	Uniprot
Uniprot	SI.CL.7.cl.777.SiJWC11ACM.scf	SI.CL.7.cl.777.SiJWC11ACM.scf		GO:0003779	SP:Q7PRP4_ANOGA	IEA		F	NOT_ASSIGNED		transcript	taxon:13686	20060515	Uniprot
Uniprot	SI.CL.7.cl.777.SiJWC11ACM.scf	SI.CL.7.cl.777.SiJWC11ACM.scf		GO:0031032	SP:Q7PRP4_ANOGA	IEA		P	NOT_ASSIGNED		transcript	taxon:13686	20060515	Uniprot
Uniprot	SI.CL.6.cl.674.Contig1	SI.CL.6.cl.674.Contig1		GO:0005739	SP:DNJA3_HUMAN	IEA		C	NOT_ASSIGNED		transcript	taxon:13686	20060515	Uniprot
Uniprot	SI.CL.6.cl.674.Contig1	SI.CL.6.cl.674.Contig1		GO:0016020	SP:TID_DROVI	IEA		C	NOT_ASSIGNED		transcript	taxon:13686	20060515	Uniprot
Uniprot	SI.CL.6.cl.674.Contig1	SI.CL.6.cl.674.Contig1		GO:0046872	SP:DNJA3_HUMAN	IEA		F	NOT_ASSIGNED		transcript	taxon:13686	20060515	Uniprot
Uniprot	SI.CL.6.cl.674.Contig1	SI.CL.6.cl.674.Contig1		GO:0005759	SP:DNJA3_HUMAN	IEA		C	NOT_ASSIGNED		transcript	taxon:13686	20060515	Uniprot
Uniprot	SI.CL.6.cl.674.Contig1	SI.CL.6.cl.674.Contig1		GO:0006457	SP:DNJA3_HUMAN	IEA		P	NOT_ASSIGNED		transcript	taxon:13686	20060515	Uniprot
Uniprot	SI.CL.6.cl.674.Contig1	SI.CL.6.cl.674.Contig1		GO:0031072	SP:DNJA3_HUMAN	IEA		F	NOT_ASSIGNED		transcript	taxon:13686	20060515	Uniprot
Uniprot	SI.CL.6.cl.674.Contig1	SI.CL.6.cl.674.Contig1		GO:0042981	SP:DNJA3_HUMAN	IEA		P	NOT_ASSIGNED		transcript	taxon:13686	20060515	Uniprot
Uniprot	SI.CL.6.cl.674.Contig1	SI.CL.6.cl.674.Contig1		GO:0007275	SP:TID_DROVI	IEA		P	NOT_ASSIGNED		transcript	taxon:13686	20060515	Uniprot
Uniprot	SI.CL.6.cl.674.Contig1	SI.CL.6.cl.674.Contig1		GO:0008270	SP:DNJA3_HUMAN	IEA		F	NOT_ASSIGNED		transcript	taxon:13686	20060515	Uniprot
Uniprot	SI.CL.6.cl.674.Contig1	SI.CL.6.cl.674.Contig1		GO:0019867	SP:TID_DROVI	IEA		C	NOT_ASSIGNED		transcript	taxon:13686	20060515	Uniprot
Uniprot	SI.CL.6.cl.674.Contig1	SI.CL.6.cl.674.Contig1		GO:0051082	SP:DNJA3_HUMAN	IEA		F	NOT_ASSIGNED		transcript	taxon:13686	20060515	Uniprot
Uniprot	SiJWB06AAH.scf	SiJWB06AAH.scf		GO:0005739	SP:SSB_HUMAN	IEA		C	NOT_ASSIGNED		transcript	taxon:13686	20060515	Uniprot
Uniprot	SiJWB06AAH.scf	SiJWB06AAH.scf		GO:0006260	SP:Q32PB0_BOVIN	IEA		P	NOT_ASSIGNED		transcript	taxon:13686	20060515	Uniprot
Uniprot	SiJWB06AAH.scf	SiJWB06AAH.scf		GO:0003677	SP:SSB_HUMAN	IEA		F	NOT_ASSIGNED		transcript	taxon:13686	20060515	Uniprot
Uniprot	SiJWB06AAH.scf	SiJWB06AAH.scf		GO:0003676	SP:SSBS_XENLA	IEA		F	NOT_ASSIGNED		transcript	taxon:13686	20060515	Uniprot
Uniprot	SiJWB06AAH.scf	SiJWB06AAH.scf		GO:0003697	SP:Q32PB0_BOVIN	IEA		F	NOT_ASSIGNED		transcript	taxon:13686	20060515	Uniprot
Uniprot	SI.CL.0.cl.065.Contig2	SI.CL.0.cl.065.Contig2		GO:0006260	SP:Q614P5_CAEBR	IEA		P	NOT_ASSIGNED		transcript	taxon:13686	20060515	Uniprot
Uniprot	SI.CL.0.cl.065.Contig2	SI.CL.0.cl.065.Contig2		GO:0000166	SP:Q614P5_CAEBR	IEA		F	NOT_ASSIGNED		transcript	taxon:13686	20060515	Uniprot
Uniprot	SI.CL.0.cl.065.Contig2	SI.CL.0.cl.065.Contig2		GO:0003677	SP:Q614P5_CAEBR	IEA		F	NOT_ASSIGNED		transcript	taxon:13686	20060515	Uniprot
Uniprot	SI.CL.0.cl.065.Contig2	SI.CL.0.cl.065.Contig2		GO:0008408	SP:Q614P5_CAEBR	IEA		F	NOT_ASSIGNED		transcript	taxon:13686	20060515	Uniprot
Uniprot	SI.CL.0.cl.065.Contig2	SI.CL.0.cl.065.Contig2		GO:0003887	SP:Q614P5_CAEBR	IEA		F	NOT_ASSIGNED		transcript	taxon:13686	20060515	Uniprot
Uniprot	SI.CL.3.cl.326.Contig1	SI.CL.3.cl.326.Contig1		GO:0005634	SP:WDR43_HUMAN	IEA		C	NOT_ASSIGNED		transcript	taxon:13686	20060515	Uniprot
Uniprot	SI.CL.3.cl.381.Contig1	SI.CL.3.cl.381.Contig1		GO:0005792	SP:SPCS3_CHICK	IEA		C	NOT_ASSIGNED		transcript	taxon:13686	20060515	Uniprot
Uniprot	SI.CL.3.cl.381.Contig1	SI.CL.3.cl.381.Contig1		GO:0009003	SP:Q3SZU5_BOVIN	IEA		F	NOT_ASSIGNED		transcript	taxon:13686	20060515	Uniprot
Uniprot	SI.CL.3.cl.381.Contig1	SI.CL.3.cl.381.Contig1		GO:0016020	SP:SPCS3_CHICK	IEA		C	NOT_ASSIGNED		transcript	taxon:13686	20060515	Uniprot
Uniprot	SI.CL.3.cl.381.Contig1	SI.CL.3.cl.381.Contig1		GO:0006465	SP:Q3SZU5_BOVIN	IEA		P	NOT_ASSIGNED		transcript	taxon:13686	20060515	Uniprot
Uniprot	SI.CL.3.cl.381.Contig1	SI.CL.3.cl.381.Contig1		GO:0008233	SP:SPCS3_CANFA	IEA		F	NOT_ASSIGNED		transcript	taxon:13686	20060515	Uniprot
Uniprot	SI.CL.3.cl.381.Contig1	SI.CL.3.cl.381.Contig1		GO:0016021	SP:Q3SZU5_BOVIN	IEA		C	NOT_ASSIGNED		transcript	taxon:13686	20060515	Uniprot
Uniprot	SI.CL.3.cl.381.Contig1	SI.CL.3.cl.381.Contig1		GO:0005787	SP:Q3SZU5_BOVIN	IEA		C	NOT_ASSIGNED		transcript	taxon:13686	20060515	Uniprot
Uniprot	SI.CL.3.cl.381.Contig1	SI.CL.3.cl.381.Contig1		GO:0005783	SP:SPCS3_CHICK	IEA		C	NOT_ASSIGNED		transcript	taxon:13686	20060515	Uniprot
Uniprot	SI.CL.3.cl.381.Contig1	SI.CL.3.cl.381.Contig1		GO:0016787	SP:SPCS3_CANFA	IEA		F	NOT_ASSIGNED		transcript	taxon:13686	20060515	Uniprot
Uniprot	SI.CL.18.cl.1875.Contig1	SI.CL.18.cl.1875.Contig1		GO:0005792	SP:CP4C1_BLADI	IEA		C	NOT_ASSIGNED		transcript	taxon:13686	20060515	Uniprot
Uniprot	SI.CL.18.cl.1875.Contig1	SI.CL.18.cl.1875.Contig1		GO:0046872	SP:CP4C1_BLADI	IEA		F	NOT_ASSIGNED		transcript	taxon:13686	20060515	Uniprot
Uniprot	SI.CL.18.cl.1875.Contig1	SI.CL.18.cl.1875.Contig1		GO:0016020	SP:CP4C1_BLADI	IEA		C	NOT_ASSIGNED		transcript	taxon:13686	20060515	Uniprot
Uniprot	SI.CL.18.cl.1875.Contig1	SI.CL.18.cl.1875.Contig1		GO:0016491	SP:CP4C1_BLADI	IEA		F	NOT_ASSIGNED		transcript	taxon:13686	20060515	Uniprot
Uniprot	SI.CL.18.cl.1875.Contig1	SI.CL.18.cl.1875.Contig1		GO:0050381	SP:CP4C1_BLADI	IEA		F	NOT_ASSIGNED		transcript	taxon:13686	20060515	Uniprot
Uniprot	SI.CL.18.cl.1875.Contig1	SI.CL.18.cl.1875.Contig1		GO:0005506	SP:CP4C1_BLADI	IEA		F	NOT_ASSIGNED		transcript	taxon:13686	20060515	Uniprot
Uniprot	SI.CL.18.cl.1875.Contig1	SI.CL.18.cl.1875.Contig1		GO:0005783	SP:CP4C1_BLADI	IEA		C	NOT_ASSIGNED		transcript	taxon:13686	20060515	Uniprot
Uniprot	SI.CL.18.cl.1875.Contig1	SI.CL.18.cl.1875.Contig1		GO:0004497	SP:CP4C1_BLADI	IEA		F	NOT_ASSIGNED		transcript	taxon:13686	20060515	Uniprot
Uniprot	SI.CL.18.cl.1875.Contig1	SI.CL.18.cl.1875.Contig1		GO:0006118	SP:CP4C1_BLADI	IEA		P	NOT_ASSIGNED		transcript	taxon:13686	20060515	Uniprot
Uniprot	SI.CL.18.cl.1875.Contig1	SI.CL.18.cl.1875.Contig1		GO:0020037	SP:CP4C1_BLADI	IEA		F	NOT_ASSIGNED		transcript	taxon:13686	20060515	Uniprot
Uniprot	SI.CL.12.cl.1246.Contig1	SI.CL.12.cl.1246.Contig1		GO:0008289	SP:ACBP_CHICK	IEA		F	NOT_ASSIGNED		transcript	taxon:13686	20060515	Uniprot
Uniprot	SI.CL.12.cl.1246.Contig1	SI.CL.12.cl.1246.Contig1		GO:0004872	SP:Q6PBE8_XENTR	IEA		F	NOT_ASSIGNED		transcript	taxon:13686	20060515	Uniprot
Uniprot	SI.CL.12.cl.1246.Contig1	SI.CL.12.cl.1246.Contig1		GO:0006810	SP:ACBP_CHICK	IEA		P	NOT_ASSIGNED		transcript	taxon:13686	20060515	Uniprot
Uniprot	SI.CL.12.cl.1246.Contig1	SI.CL.12.cl.1246.Contig1		GO:0000062	SP:ACBP_CHICK	IEA		F	NOT_ASSIGNED		transcript	taxon:13686	20060515	Uniprot
Uniprot	SI.CL.23.cl.2336.Contig1	SI.CL.23.cl.2336.Contig1		GO:0046872	SP:Q9PTI4_CHICK	IEA		F	NOT_ASSIGNED		transcript	taxon:13686	20060515	Uniprot
Uniprot	SI.CL.23.cl.2336.Contig1	SI.CL.23.cl.2336.Contig1		GO:0003676	SP:Q9PTI4_CHICK	IEA		F	NOT_ASSIGNED		transcript	taxon:13686	20060515	Uniprot
Uniprot	SI.CL.23.cl.2336.Contig1	SI.CL.23.cl.2336.Contig1		GO:0008270	SP:Q9PTI4_CHICK	IEA		F	NOT_ASSIGNED		transcript	taxon:13686	20060515	Uniprot
Uniprot	SI.CL.23.cl.2336.Contig1	SI.CL.23.cl.2336.Contig1		GO:0005515	SP:Q9PTI4_CHICK	IEA		F	NOT_ASSIGNED		transcript	taxon:13686	20060515	Uniprot
Uniprot	SI.CL.18.cl.1852.Contig1	SI.CL.18.cl.1852.Contig1		GO:0006166	SP:ADK_PHYPA	IEA		P	NOT_ASSIGNED		transcript	taxon:13686	20060515	Uniprot
Uniprot	SI.CL.18.cl.1852.Contig1	SI.CL.18.cl.1852.Contig1		GO:0004001	SP:ADK_PHYPA	IEA		F	NOT_ASSIGNED		transcript	taxon:13686	20060515	Uniprot
Uniprot	SI.CL.18.cl.1852.Contig1	SI.CL.18.cl.1852.Contig1		GO:0016301	SP:ADK_PHYPA	IEA		F	NOT_ASSIGNED		transcript	taxon:13686	20060515	Uniprot
Uniprot	SI.CL.18.cl.1852.Contig1	SI.CL.18.cl.1852.Contig1		GO:0016740	SP:ADK_PHYPA	IEA		F	NOT_ASSIGNED		transcript	taxon:13686	20060515	Uniprot
Uniprot	SI.CL.18.cl.1852.Contig1	SI.CL.18.cl.1852.Contig1		GO:0000287	SP:ADK_PHYPA	IEA		F	NOT_ASSIGNED		transcript	taxon:13686	20060515	Uniprot
Uniprot	SI.CL.32.cl.3269.Contig1	SI.CL.32.cl.3269.Contig1		GO:0000166	SP:PANK1_HUMAN	IEA		F	NOT_ASSIGNED		transcript	taxon:13686	20060515	Uniprot
Uniprot	SI.CL.32.cl.3269.Contig1	SI.CL.32.cl.3269.Contig1		GO:0005524	SP:PANK1_HUMAN	IEA		F	NOT_ASSIGNED		transcript	taxon:13686	20060515	Uniprot
Uniprot	SI.CL.32.cl.3269.Contig1	SI.CL.32.cl.3269.Contig1		GO:0004594	SP:PANK1_HUMAN	IEA		F	NOT_ASSIGNED		transcript	taxon:13686	20060515	Uniprot
Uniprot	SI.CL.32.cl.3269.Contig1	SI.CL.32.cl.3269.Contig1		GO:0015937	SP:PANK1_HUMAN	IEA		P	NOT_ASSIGNED		transcript	taxon:13686	20060515	Uniprot
Uniprot	SI.CL.32.cl.3269.Contig1	SI.CL.32.cl.3269.Contig1		GO:0016740	SP:PANK1_HUMAN	IEA		F	NOT_ASSIGNED		transcript	taxon:13686	20060515	Uniprot
Uniprot	SI.CL.12.cl.1209.Contig1	SI.CL.12.cl.1209.Contig1		GO:0005739	SP:IDH3B_BOVIN	IEA		C	NOT_ASSIGNED		transcript	taxon:13686	20060515	Uniprot
Uniprot	SI.CL.12.cl.1209.Contig1	SI.CL.12.cl.1209.Contig1		GO:0006099	SP:IDH3B_BOVIN	IEA		P	NOT_ASSIGNED		transcript	taxon:13686	20060515	Uniprot
Uniprot	SI.CL.12.cl.1209.Contig1	SI.CL.12.cl.1209.Contig1		GO:0008152	SP:IDH3B_BOVIN	IEA		P	NOT_ASSIGNED		transcript	taxon:13686	20060515	Uniprot
Uniprot	SI.CL.12.cl.1209.Contig1	SI.CL.12.cl.1209.Contig1		GO:0016491	SP:IDH3B_BOVIN	IEA		F	NOT_ASSIGNED		transcript	taxon:13686	20060515	Uniprot
Uniprot	SI.CL.12.cl.1209.Contig1	SI.CL.12.cl.1209.Contig1		GO:0006102	SP:IDH3B_HUMAN	IEA		P	NOT_ASSIGNED		transcript	taxon:13686	20060515	Uniprot
Uniprot	SI.CL.12.cl.1209.Contig1	SI.CL.12.cl.1209.Contig1		GO:0005975	SP:IDH3B_HUMAN	IEA		P	NOT_ASSIGNED		transcript	taxon:13686	20060515	Uniprot
Uniprot	SI.CL.12.cl.1209.Contig1	SI.CL.12.cl.1209.Contig1		GO:0004449	SP:IDH3B_BOVIN	IEA		F	NOT_ASSIGNED		transcript	taxon:13686	20060515	Uniprot
Uniprot	SI.CL.27.cl.2754.Contig1	SI.CL.27.cl.2754.Contig1		GO:0016740	SP:Q5PY76_AEDAE	IEA		F	NOT_ASSIGNED		transcript	taxon:13686	20060515	Uniprot
Uniprot	SiJWG04ABQ.scf	SiJWG04ABQ.scf		GO:0016068	SP:VA3_SOLIN	IEA		P	NOT_ASSIGNED		transcript	taxon:13686	20060515	Uniprot
Uniprot	SiJWG04ABQ.scf	SiJWG04ABQ.scf		GO:0005576	SP:VA3_SOLIN	IEA		C	NOT_ASSIGNED		transcript	taxon:13686	20060515	Uniprot
Uniprot	SI.CL.37.cl.3789.Contig1	SI.CL.37.cl.3789.Contig1		GO:0016020	SP:COG5_HUMAN	IEA		C	NOT_ASSIGNED		transcript	taxon:13686	20060515	Uniprot
Uniprot	SI.CL.37.cl.3789.Contig1	SI.CL.37.cl.3789.Contig1		GO:0006891	SP:COG5_HUMAN	IEA		P	NOT_ASSIGNED		transcript	taxon:13686	20060515	Uniprot
Uniprot	SI.CL.37.cl.3789.Contig1	SI.CL.37.cl.3789.Contig1		GO:0005795	SP:COG5_HUMAN	IEA		C	NOT_ASSIGNED		transcript	taxon:13686	20060515	Uniprot
Uniprot	SI.CL.37.cl.3789.Contig1	SI.CL.37.cl.3789.Contig1		GO:0015031	SP:COG5_HUMAN	IEA		P	NOT_ASSIGNED		transcript	taxon:13686	20060515	Uniprot
Uniprot	SI.CL.37.cl.3789.Contig1	SI.CL.37.cl.3789.Contig1		GO:0005554	SP:COG5_HUMAN	IEA		F	NOT_ASSIGNED		transcript	taxon:13686	20060515	Uniprot
Uniprot	SI.CL.37.cl.3789.Contig1	SI.CL.37.cl.3789.Contig1		GO:0005515	SP:COG5_HUMAN	IEA		F	NOT_ASSIGNED		transcript	taxon:13686	20060515	Uniprot
Uniprot	SI.CL.37.cl.3789.Contig1	SI.CL.37.cl.3789.Contig1		GO:0017119	SP:COG5_HUMAN	IEA		C	NOT_ASSIGNED		transcript	taxon:13686	20060515	Uniprot
Uniprot	SI.CL.42.cl.4208.Contig1	SI.CL.42.cl.4208.Contig1		GO:0016021	SP:Q8N4V1_HUMAN	IEA		C	NOT_ASSIGNED		transcript	taxon:13686	20060515	Uniprot
Uniprot	SI.CL.40.cl.4078.Contig1	SI.CL.40.cl.4078.Contig1		GO:0016192	SP:CECR2_HUMAN	IEA		P	NOT_ASSIGNED		transcript	taxon:13686	20060515	Uniprot
Uniprot	SI.CL.40.cl.4078.Contig1	SI.CL.40.cl.4078.Contig1		GO:0000910	SP:CECR2_HUMAN	IEA		P	NOT_ASSIGNED		transcript	taxon:13686	20060515	Uniprot
Uniprot	SI.CL.40.cl.4078.Contig1	SI.CL.40.cl.4078.Contig1		GO:0008372	SP:CECR2_HUMAN	IEA		C	NOT_ASSIGNED		transcript	taxon:13686	20060515	Uniprot
Uniprot	SI.CL.40.cl.4078.Contig1	SI.CL.40.cl.4078.Contig1		GO:0005554	SP:CECR2_HUMAN	IEA		F	NOT_ASSIGNED		transcript	taxon:13686	20060515	Uniprot
Uniprot	SI.CL.40.cl.4078.Contig1	SI.CL.40.cl.4078.Contig1		GO:0007010	SP:CECR2_HUMAN	IEA		P	NOT_ASSIGNED		transcript	taxon:13686	20060515	Uniprot
Uniprot	SI.CL.40.cl.4078.Contig1	SI.CL.40.cl.4078.Contig1		GO:0008080	SP:Q560C5_CRYNE	IEA		F	NOT_ASSIGNED		transcript	taxon:13686	20060515	Uniprot
Uniprot	SI.CL.19.cl.1982.Contig1	SI.CL.19.cl.1982.Contig1		GO:0005344	SP:O18320_CALVI	IEA		F	NOT_ASSIGNED		transcript	taxon:13686	20060515	Uniprot
Uniprot	SI.CL.19.cl.1982.Contig1	SI.CL.19.cl.1982.Contig1		GO:0045735	SP:ARY1_CALVI	IEA		F	NOT_ASSIGNED		transcript	taxon:13686	20060515	Uniprot
Uniprot	SI.CL.19.cl.1982.Contig1	SI.CL.19.cl.1982.Contig1		GO:0016068	SP:CRPI_PERAM	IEA		P	NOT_ASSIGNED		transcript	taxon:13686	20060515	Uniprot
Uniprot	SI.CL.19.cl.1982.Contig1	SI.CL.19.cl.1982.Contig1		GO:0006810	SP:O18320_CALVI	IEA		P	NOT_ASSIGNED		transcript	taxon:13686	20060515	Uniprot
Uniprot	SI.CL.5.cl.528.SiJWF07ACN.scf	SI.CL.5.cl.528.SiJWF07ACN.scf		GO:0006412	SP:Q4GXJ9_9SCAR	IEA		P	NOT_ASSIGNED		transcript	taxon:13686	20060515	Uniprot
Uniprot	SI.CL.5.cl.528.SiJWF07ACN.scf	SI.CL.5.cl.528.SiJWF07ACN.scf		GO:0005840	SP:Q4GXJ9_9SCAR	IEA		C	NOT_ASSIGNED		transcript	taxon:13686	20060515	Uniprot
Uniprot	SI.CL.5.cl.528.SiJWF07ACN.scf	SI.CL.5.cl.528.SiJWF07ACN.scf		GO:0030529	SP:RL10A_SPOFR	IEA		C	NOT_ASSIGNED		transcript	taxon:13686	20060515	Uniprot
Uniprot	SI.CL.5.cl.528.SiJWF07ACN.scf	SI.CL.5.cl.528.SiJWF07ACN.scf		GO:0003735	SP:Q4GXJ9_9SCAR	IEA		F	NOT_ASSIGNED		transcript	taxon:13686	20060515	Uniprot
Uniprot	SI.CL.5.cl.528.SiJWF07ACN.scf	SI.CL.5.cl.528.SiJWF07ACN.scf		GO:0005622	SP:Q4GXJ9_9SCAR	IEA		C	NOT_ASSIGNED		transcript	taxon:13686	20060515	Uniprot
Uniprot	SiJWA02BBJ2.scf	SiJWA02BBJ2.scf		GO:0046872	SP:Q4SUE4_TETNG	IEA		F	NOT_ASSIGNED		transcript	taxon:13686	20060515	Uniprot
Uniprot	SiJWA02BBJ2.scf	SiJWA02BBJ2.scf		GO:0008270	SP:Q4SUE4_TETNG	IEA		F	NOT_ASSIGNED		transcript	taxon:13686	20060515	Uniprot
Uniprot	SiJWA02BBJ2.scf	SiJWA02BBJ2.scf		GO:0005515	SP:Q4SUE4_TETNG	IEA		F	NOT_ASSIGNED		transcript	taxon:13686	20060515	Uniprot
Uniprot	SiJWE01BDQ.scf	SiJWE01BDQ.scf		GO:0030016	SP:Q8WZ53_HUMAN	IEA		C	NOT_ASSIGNED		transcript	taxon:13686	20060515	Uniprot
Uniprot	SiJWE01BDQ.scf	SiJWE01BDQ.scf		GO:0005515	SP:Q8WZ53_HUMAN	IEA		F	NOT_ASSIGNED		transcript	taxon:13686	20060515	Uniprot
Uniprot	SI.CL.24.cl.2452.Contig1	SI.CL.24.cl.2452.Contig1		GO:0005634	SP:Q66KG7_XENLA	IEA		C	NOT_ASSIGNED		transcript	taxon:13686	20060515	Uniprot
Uniprot	SI.CL.24.cl.2452.Contig1	SI.CL.24.cl.2452.Contig1		GO:0046872	SP:Q8NHG8_HUMAN	IEA		F	NOT_ASSIGNED		transcript	taxon:13686	20060515	Uniprot
Uniprot	SI.CL.24.cl.2452.Contig1	SI.CL.24.cl.2452.Contig1		GO:0008270	SP:Q8NHG8_HUMAN	IEA		F	NOT_ASSIGNED		transcript	taxon:13686	20060515	Uniprot
Uniprot	SI.CL.24.cl.2452.Contig1	SI.CL.24.cl.2452.Contig1		GO:0005515	SP:Q8NHG8_HUMAN	IEA		F	NOT_ASSIGNED		transcript	taxon:13686	20060515	Uniprot
Uniprot	SI.CL.24.cl.2452.Contig1	SI.CL.24.cl.2452.Contig1		GO:0006512	SP:Q8NHG8_HUMAN	IEA		P	NOT_ASSIGNED		transcript	taxon:13686	20060515	Uniprot
Uniprot	SI.CL.0.cl.090.Contig1	SI.CL.0.cl.090.Contig1		GO:0004197	SP:O97453_SARPE	IEA		F	NOT_ASSIGNED		transcript	taxon:13686	20060515	Uniprot
Uniprot	SI.CL.0.cl.090.Contig1	SI.CL.0.cl.090.Contig1		GO:0016787	SP:O97453_SARPE	IEA		F	NOT_ASSIGNED		transcript	taxon:13686	20060515	Uniprot
Uniprot	SI.CL.0.cl.090.Contig1	SI.CL.0.cl.090.Contig1		GO:0008233	SP:O97453_SARPE	IEA		F	NOT_ASSIGNED		transcript	taxon:13686	20060515	Uniprot
Uniprot	SI.CL.0.cl.090.Contig1	SI.CL.0.cl.090.Contig1		GO:0006508	SP:O97453_SARPE	IEA		P	NOT_ASSIGNED		transcript	taxon:13686	20060515	Uniprot
Uniprot	SI.CL.0.cl.090.Contig1	SI.CL.0.cl.090.Contig1		GO:0008234	SP:O97453_SARPE	IEA		F	NOT_ASSIGNED		transcript	taxon:13686	20060515	Uniprot
Uniprot	SI.CL.5.cl.580.Contig1	SI.CL.5.cl.580.Contig1		GO:0006412	SP:Q4FZP7_XENLA	IEA		P	NOT_ASSIGNED		transcript	taxon:13686	20060515	Uniprot
Uniprot	SI.CL.5.cl.580.Contig1	SI.CL.5.cl.580.Contig1		GO:0005840	SP:Q4FZP7_XENLA	IEA		C	NOT_ASSIGNED		transcript	taxon:13686	20060515	Uniprot
Uniprot	SI.CL.5.cl.580.Contig1	SI.CL.5.cl.580.Contig1		GO:0030529	SP:RL39_PLUXY	IEA		C	NOT_ASSIGNED		transcript	taxon:13686	20060515	Uniprot
Uniprot	SI.CL.5.cl.580.Contig1	SI.CL.5.cl.580.Contig1		GO:0003735	SP:Q4FZP7_XENLA	IEA		F	NOT_ASSIGNED		transcript	taxon:13686	20060515	Uniprot
Uniprot	SI.CL.5.cl.580.Contig1	SI.CL.5.cl.580.Contig1		GO:0005622	SP:Q4FZP7_XENLA	IEA		C	NOT_ASSIGNED		transcript	taxon:13686	20060515	Uniprot
Uniprot	SI.CL.23.cl.2328.Contig1	SI.CL.23.cl.2328.Contig1		GO:0000166	SP:O01378_BOMMO	IEA		F	NOT_ASSIGNED		transcript	taxon:13686	20060515	Uniprot
Uniprot	SI.CL.23.cl.2328.Contig1	SI.CL.23.cl.2328.Contig1		GO:0005524	SP:O01378_BOMMO	IEA		F	NOT_ASSIGNED		transcript	taxon:13686	20060515	Uniprot
Uniprot	SI.CL.23.cl.2328.Contig1	SI.CL.23.cl.2328.Contig1		GO:0004386	SP:O01378_BOMMO	IEA		F	NOT_ASSIGNED		transcript	taxon:13686	20060515	Uniprot
Uniprot	SI.CL.23.cl.2328.Contig1	SI.CL.23.cl.2328.Contig1		GO:0016787	SP:O01378_BOMMO	IEA		F	NOT_ASSIGNED		transcript	taxon:13686	20060515	Uniprot
Uniprot	SI.CL.23.cl.2328.Contig1	SI.CL.23.cl.2328.Contig1		GO:0003676	SP:O01378_BOMMO	IEA		F	NOT_ASSIGNED		transcript	taxon:13686	20060515	Uniprot
Uniprot	SI.CL.23.cl.2328.Contig1	SI.CL.23.cl.2328.Contig1		GO:0008026	SP:O01378_BOMMO	IEA		F	NOT_ASSIGNED		transcript	taxon:13686	20060515	Uniprot
Uniprot	SI.CL.35.cl.3594.Contig1	SI.CL.35.cl.3594.Contig1		GO:0004252	SP:CTR2_VESOR	IEA		F	NOT_ASSIGNED		transcript	taxon:13686	20060515	Uniprot
Uniprot	SI.CL.35.cl.3594.Contig1	SI.CL.35.cl.3594.Contig1		GO:0016787	SP:CTR2_VESOR	IEA		F	NOT_ASSIGNED		transcript	taxon:13686	20060515	Uniprot
Uniprot	SI.CL.35.cl.3594.Contig1	SI.CL.35.cl.3594.Contig1		GO:0008233	SP:CTR2_VESOR	IEA		F	NOT_ASSIGNED		transcript	taxon:13686	20060515	Uniprot
Uniprot	SI.CL.35.cl.3594.Contig1	SI.CL.35.cl.3594.Contig1		GO:0004263	SP:CTR2_VESOR	IEA		F	NOT_ASSIGNED		transcript	taxon:13686	20060515	Uniprot
Uniprot	SI.CL.35.cl.3594.Contig1	SI.CL.35.cl.3594.Contig1		GO:0006508	SP:CTR2_VESOR	IEA		P	NOT_ASSIGNED		transcript	taxon:13686	20060515	Uniprot
Uniprot	SiJWB10ABK.scf	SiJWB10ABK.scf		GO:0000166	SP:O61334_APIME	IEA		F	NOT_ASSIGNED		transcript	taxon:13686	20060515	Uniprot
Uniprot	SiJWB10ABK.scf	SiJWB10ABK.scf		GO:0006412	SP:O61334_APIME	IEA		P	NOT_ASSIGNED		transcript	taxon:13686	20060515	Uniprot
Uniprot	SiJWB10ABK.scf	SiJWB10ABK.scf		GO:0005737	SP:O61334_APIME	IEA		C	NOT_ASSIGNED		transcript	taxon:13686	20060515	Uniprot
Uniprot	SiJWB10ABK.scf	SiJWB10ABK.scf		GO:0003746	SP:O61334_APIME	IEA		F	NOT_ASSIGNED		transcript	taxon:13686	20060515	Uniprot
Uniprot	SiJWB10ABK.scf	SiJWB10ABK.scf		GO:0006414	SP:O61334_APIME	IEA		P	NOT_ASSIGNED		transcript	taxon:13686	20060515	Uniprot
Uniprot	SiJWB10ABK.scf	SiJWB10ABK.scf		GO:0005525	SP:O61334_APIME	IEA		F	NOT_ASSIGNED		transcript	taxon:13686	20060515	Uniprot
Uniprot	SiJWF07ADP.scf	SiJWF07ADP.scf		GO:0005739	SP:C1TC_HUMAN	IEA		C	NOT_ASSIGNED		transcript	taxon:13686	20060515	Uniprot
Uniprot	SiJWF07ADP.scf	SiJWF07ADP.scf		GO:0004488	SP:C1TC_HUMAN	IEA		F	NOT_ASSIGNED		transcript	taxon:13686	20060515	Uniprot
Uniprot	SiJWF07ADP.scf	SiJWF07ADP.scf		GO:0004477	SP:C1TC_HUMAN	IEA		F	NOT_ASSIGNED		transcript	taxon:13686	20060515	Uniprot
Uniprot	SiJWF07ADP.scf	SiJWF07ADP.scf		GO:0009396	SP:C1TC_HUMAN	IEA		P	NOT_ASSIGNED		transcript	taxon:13686	20060515	Uniprot
Uniprot	SiJWF07ADP.scf	SiJWF07ADP.scf		GO:0000166	SP:C1TC_HUMAN	IEA		F	NOT_ASSIGNED		transcript	taxon:13686	20060515	Uniprot
Uniprot	SiJWF07ADP.scf	SiJWF07ADP.scf		GO:0016787	SP:C1TC_HUMAN	IEA		F	NOT_ASSIGNED		transcript	taxon:13686	20060515	Uniprot
Uniprot	SiJWF07ADP.scf	SiJWF07ADP.scf		GO:0003824	SP:Q2UQ35_ASPOR	IEA		F	NOT_ASSIGNED		transcript	taxon:13686	20060515	Uniprot
Uniprot	SiJWF07ADP.scf	SiJWF07ADP.scf		GO:0009086	SP:C1TC_HUMAN	IEA		P	NOT_ASSIGNED		transcript	taxon:13686	20060515	Uniprot
Uniprot	SiJWF07ADP.scf	SiJWF07ADP.scf		GO:0008652	SP:C1TC_HUMAN	IEA		P	NOT_ASSIGNED		transcript	taxon:13686	20060515	Uniprot
Uniprot	SiJWF07ADP.scf	SiJWF07ADP.scf		GO:0004329	SP:C1TC_HUMAN	IEA		F	NOT_ASSIGNED		transcript	taxon:13686	20060515	Uniprot
Uniprot	SiJWF07ADP.scf	SiJWF07ADP.scf		GO:0016491	SP:C1TC_HUMAN	IEA		F	NOT_ASSIGNED		transcript	taxon:13686	20060515	Uniprot
Uniprot	SiJWF07ADP.scf	SiJWF07ADP.scf		GO:0000105	SP:C1TC_HUMAN	IEA		P	NOT_ASSIGNED		transcript	taxon:13686	20060515	Uniprot
Uniprot	SiJWF07ADP.scf	SiJWF07ADP.scf		GO:0016874	SP:C1TC_HUMAN	IEA		F	NOT_ASSIGNED		transcript	taxon:13686	20060515	Uniprot
Uniprot	SiJWF07ADP.scf	SiJWF07ADP.scf		GO:0005524	SP:C1TC_HUMAN	IEA		F	NOT_ASSIGNED		transcript	taxon:13686	20060515	Uniprot
Uniprot	SiJWF07ADP.scf	SiJWF07ADP.scf		GO:0006164	SP:C1TC_HUMAN	IEA		P	NOT_ASSIGNED		transcript	taxon:13686	20060515	Uniprot
Uniprot	SiJWF07ADP.scf	SiJWF07ADP.scf		GO:0006730	SP:C1TC_HUMAN	IEA		P	NOT_ASSIGNED		transcript	taxon:13686	20060515	Uniprot
Uniprot	SI.CL.10.cl.1044.Contig1	SI.CL.10.cl.1044.Contig1		GO:0005739	SP:Q5F339_CHICK	IEA		C	NOT_ASSIGNED		transcript	taxon:13686	20060515	Uniprot
Uniprot	SI.CL.10.cl.1044.Contig1	SI.CL.10.cl.1044.Contig1		GO:0004408	SP:Q5F339_CHICK	IEA		F	NOT_ASSIGNED		transcript	taxon:13686	20060515	Uniprot
Uniprot	SI.CL.10.cl.1044.Contig1	SI.CL.10.cl.1044.Contig1		GO:0016829	SP:Q6DJ96_XENTR	IEA		F	NOT_ASSIGNED		transcript	taxon:13686	20060515	Uniprot
Uniprot	SI.CL.3.cl.310.Contig1	SI.CL.3.cl.310.Contig1		GO:0006412	SP:RS24_FUGRU	IEA		P	NOT_ASSIGNED		transcript	taxon:13686	20060515	Uniprot
Uniprot	SI.CL.3.cl.310.Contig1	SI.CL.3.cl.310.Contig1		GO:0005840	SP:RS24_FUGRU	IEA		C	NOT_ASSIGNED		transcript	taxon:13686	20060515	Uniprot
Uniprot	SI.CL.3.cl.310.Contig1	SI.CL.3.cl.310.Contig1		GO:0030529	SP:RS24_FUGRU	IEA		C	NOT_ASSIGNED		transcript	taxon:13686	20060515	Uniprot
Uniprot	SI.CL.3.cl.310.Contig1	SI.CL.3.cl.310.Contig1		GO:0003735	SP:RS24_FUGRU	IEA		F	NOT_ASSIGNED		transcript	taxon:13686	20060515	Uniprot
Uniprot	SI.CL.3.cl.310.Contig1	SI.CL.3.cl.310.Contig1		GO:0005622	SP:RS24_FUGRU	IEA		C	NOT_ASSIGNED		transcript	taxon:13686	20060515	Uniprot
Uniprot	SI.CL.43.cl.4336.Contig1	SI.CL.43.cl.4336.Contig1		GO:0005509	SP:Q7Q2G6_ANOGA	IEA		F	NOT_ASSIGNED		transcript	taxon:13686	20060515	Uniprot
Uniprot	SiJWG10BCK2.scf	SiJWG10BCK2.scf		GO:0005739	SP:NU5M_APILI	IEA		C	NOT_ASSIGNED		transcript	taxon:13686	20060515	Uniprot
Uniprot	SiJWG10BCK2.scf	SiJWG10BCK2.scf		GO:0042773	SP:NU5M_APILI	IEA		P	NOT_ASSIGNED		transcript	taxon:13686	20060515	Uniprot
Uniprot	SiJWG10BCK2.scf	SiJWG10BCK2.scf		GO:0016020	SP:NU5M_APILI	IEA		C	NOT_ASSIGNED		transcript	taxon:13686	20060515	Uniprot
Uniprot	SiJWG10BCK2.scf	SiJWG10BCK2.scf		GO:0008137	SP:NU5M_APILI	IEA		F	NOT_ASSIGNED		transcript	taxon:13686	20060515	Uniprot
Uniprot	SiJWG10BCK2.scf	SiJWG10BCK2.scf		GO:0004965	SP:NU5M_LOCMI	IEA		F	NOT_ASSIGNED		transcript	taxon:13686	20060515	Uniprot
Uniprot	SiJWG10BCK2.scf	SiJWG10BCK2.scf		GO:0016491	SP:NU5M_APILI	IEA		F	NOT_ASSIGNED		transcript	taxon:13686	20060515	Uniprot
Uniprot	SiJWG10BCK2.scf	SiJWG10BCK2.scf		GO:0016021	SP:NU5M_APILI	IEA		C	NOT_ASSIGNED		transcript	taxon:13686	20060515	Uniprot
Uniprot	SI.CL.16.cl.1624.Contig1	SI.CL.16.cl.1624.Contig1		GO:0003824	SP:Q7PSQ5_ANOGA	IEA		F	NOT_ASSIGNED		transcript	taxon:13686	20060515	Uniprot
Uniprot	SI.CL.11.cl.1166.SiJWF02CAT2.scf	SI.CL.11.cl.1166.SiJWF02CAT2.scf		GO:0005874	SP:DLC2B_HUMAN	IEA		C	NOT_ASSIGNED		transcript	taxon:13686	20060515	Uniprot
Uniprot	SI.CL.11.cl.1166.SiJWF02CAT2.scf	SI.CL.11.cl.1166.SiJWF02CAT2.scf		GO:0005868	SP:DLC2B_HUMAN	IEA		C	NOT_ASSIGNED		transcript	taxon:13686	20060515	Uniprot
Uniprot	SI.CL.11.cl.1166.SiJWF02CAT2.scf	SI.CL.11.cl.1166.SiJWF02CAT2.scf		GO:0005515	SP:DLC2B_HUMAN	IEA		F	NOT_ASSIGNED		transcript	taxon:13686	20060515	Uniprot
Uniprot	SI.CL.11.cl.1166.SiJWF02CAT2.scf	SI.CL.11.cl.1166.SiJWF02CAT2.scf		GO:0003777	SP:DLC2B_HUMAN	IEA		F	NOT_ASSIGNED		transcript	taxon:13686	20060515	Uniprot
Uniprot	SI.CL.11.cl.1166.SiJWF02CAT2.scf	SI.CL.11.cl.1166.SiJWF02CAT2.scf		GO:0007018	SP:DLC2B_HUMAN	IEA		P	NOT_ASSIGNED		transcript	taxon:13686	20060515	Uniprot
Uniprot	SiJWG03CAW.scf	SiJWG03CAW.scf		GO:0005634	SP:RPC8_HUMAN	IEA		C	NOT_ASSIGNED		transcript	taxon:13686	20060515	Uniprot
Uniprot	SiJWG03CAW.scf	SiJWG03CAW.scf		GO:0003676	SP:RPC8_HUMAN	IEA		F	NOT_ASSIGNED		transcript	taxon:13686	20060515	Uniprot
Uniprot	SiJWG03CAW.scf	SiJWG03CAW.scf		GO:0005666	SP:RPC8_HUMAN	IEA		C	NOT_ASSIGNED		transcript	taxon:13686	20060515	Uniprot
Uniprot	SiJWG03CAW.scf	SiJWG03CAW.scf		GO:0006350	SP:RPC8_HUMAN	IEA		P	NOT_ASSIGNED		transcript	taxon:13686	20060515	Uniprot
Uniprot	SiJWG03CAW.scf	SiJWG03CAW.scf		GO:0006383	SP:RPC8_HUMAN	IEA		P	NOT_ASSIGNED		transcript	taxon:13686	20060515	Uniprot
Uniprot	SiJWG03CAW.scf	SiJWG03CAW.scf		GO:0005515	SP:RPC8_HUMAN	IEA		F	NOT_ASSIGNED		transcript	taxon:13686	20060515	Uniprot
Uniprot	SiJWG03CAW.scf	SiJWG03CAW.scf		GO:0003899	SP:RPC8_HUMAN	IEA		F	NOT_ASSIGNED		transcript	taxon:13686	20060515	Uniprot
Uniprot	SiJWG03CAW.scf	SiJWG03CAW.scf		GO:0016740	SP:RPC8_HUMAN	IEA		F	NOT_ASSIGNED		transcript	taxon:13686	20060515	Uniprot
Uniprot	SI.CL.0.cl.065.Contig4	SI.CL.0.cl.065.Contig4		GO:0006260	SP:Q614P5_CAEBR	IEA		P	NOT_ASSIGNED		transcript	taxon:13686	20060515	Uniprot
Uniprot	SI.CL.0.cl.065.Contig4	SI.CL.0.cl.065.Contig4		GO:0000166	SP:Q614P5_CAEBR	IEA		F	NOT_ASSIGNED		transcript	taxon:13686	20060515	Uniprot
Uniprot	SI.CL.0.cl.065.Contig4	SI.CL.0.cl.065.Contig4		GO:0003677	SP:Q614P5_CAEBR	IEA		F	NOT_ASSIGNED		transcript	taxon:13686	20060515	Uniprot
Uniprot	SI.CL.0.cl.065.Contig4	SI.CL.0.cl.065.Contig4		GO:0008408	SP:Q614P5_CAEBR	IEA		F	NOT_ASSIGNED		transcript	taxon:13686	20060515	Uniprot
Uniprot	SI.CL.0.cl.065.Contig4	SI.CL.0.cl.065.Contig4		GO:0003887	SP:Q614P5_CAEBR	IEA		F	NOT_ASSIGNED		transcript	taxon:13686	20060515	Uniprot
Uniprot	SI.CL.9.cl.998.Contig1	SI.CL.9.cl.998.Contig1		GO:0004721	SP:PPAC_PIG	IEA		F	NOT_ASSIGNED		transcript	taxon:13686	20060515	Uniprot
Uniprot	SI.CL.9.cl.998.Contig1	SI.CL.9.cl.998.Contig1		GO:0005625	SP:PPAC_HUMAN	IEA		C	NOT_ASSIGNED		transcript	taxon:13686	20060515	Uniprot
Uniprot	SI.CL.9.cl.998.Contig1	SI.CL.9.cl.998.Contig1		GO:0006470	SP:PPAC_BOVIN	IEA		P	NOT_ASSIGNED		transcript	taxon:13686	20060515	Uniprot
Uniprot	SI.CL.9.cl.998.Contig1	SI.CL.9.cl.998.Contig1		GO:0004726	SP:PPAC_BOVIN	IEA		F	NOT_ASSIGNED		transcript	taxon:13686	20060515	Uniprot
Uniprot	SI.CL.9.cl.998.Contig1	SI.CL.9.cl.998.Contig1		GO:0003993	SP:PPAC_BOVIN	IEA		F	NOT_ASSIGNED		transcript	taxon:13686	20060515	Uniprot
Uniprot	SI.CL.9.cl.998.Contig1	SI.CL.9.cl.998.Contig1		GO:0004725	SP:PPAC_PIG	IEA		F	NOT_ASSIGNED		transcript	taxon:13686	20060515	Uniprot
Uniprot	SI.CL.9.cl.998.Contig1	SI.CL.9.cl.998.Contig1		GO:0016787	SP:PPAC_BOVIN	IEA		F	NOT_ASSIGNED		transcript	taxon:13686	20060515	Uniprot
Uniprot	SI.CL.9.cl.998.Contig1	SI.CL.9.cl.998.Contig1		GO:0005737	SP:PPAC_HUMAN	IEA		C	NOT_ASSIGNED		transcript	taxon:13686	20060515	Uniprot
Uniprot	SI.CL.5.cl.554.Contig1	SI.CL.5.cl.554.Contig1		GO:0005739	SP:MAON_HUMAN	IEA		C	NOT_ASSIGNED		transcript	taxon:13686	20060515	Uniprot
Uniprot	SI.CL.5.cl.554.Contig1	SI.CL.5.cl.554.Contig1		GO:0016616	SP:Q2QBI9_DROSI	IEA		F	NOT_ASSIGNED		transcript	taxon:13686	20060515	Uniprot
Uniprot	SI.CL.5.cl.554.Contig1	SI.CL.5.cl.554.Contig1		GO:0046872	SP:MAON_HUMAN	IEA		F	NOT_ASSIGNED		transcript	taxon:13686	20060515	Uniprot
Uniprot	SI.CL.5.cl.554.Contig1	SI.CL.5.cl.554.Contig1		GO:0004473	SP:MAON_HUMAN	IEA		F	NOT_ASSIGNED		transcript	taxon:13686	20060515	Uniprot
Uniprot	SI.CL.5.cl.554.Contig1	SI.CL.5.cl.554.Contig1		GO:0016491	SP:MAON_HUMAN	IEA		F	NOT_ASSIGNED		transcript	taxon:13686	20060515	Uniprot
Uniprot	SI.CL.5.cl.554.Contig1	SI.CL.5.cl.554.Contig1		GO:0004470	SP:Q2QBI9_DROSI	IEA		F	NOT_ASSIGNED		transcript	taxon:13686	20060515	Uniprot
Uniprot	SI.CL.5.cl.554.Contig1	SI.CL.5.cl.554.Contig1		GO:0006108	SP:MAON_HUMAN	IEA		P	NOT_ASSIGNED		transcript	taxon:13686	20060515	Uniprot
Uniprot	SI.CL.5.cl.554.Contig1	SI.CL.5.cl.554.Contig1		GO:0051287	SP:MAON_HUMAN	IEA		F	NOT_ASSIGNED		transcript	taxon:13686	20060515	Uniprot
Uniprot	SI.CL.5.cl.554.Contig1	SI.CL.5.cl.554.Contig1		GO:0006090	SP:MAON_HUMAN	IEA		P	NOT_ASSIGNED		transcript	taxon:13686	20060515	Uniprot
Uniprot	SiJWC06ADP.scf	SiJWC06ADP.scf		GO:0005874	SP:SNX23_HUMAN	IEA		C	NOT_ASSIGNED		transcript	taxon:13686	20060515	Uniprot
Uniprot	SiJWC06ADP.scf	SiJWC06ADP.scf		GO:0007018	SP:SNX23_HUMAN	IEA		P	NOT_ASSIGNED		transcript	taxon:13686	20060515	Uniprot
Uniprot	SiJWC06ADP.scf	SiJWC06ADP.scf		GO:0000166	SP:SNX23_HUMAN	IEA		F	NOT_ASSIGNED		transcript	taxon:13686	20060515	Uniprot
Uniprot	SiJWC06ADP.scf	SiJWC06ADP.scf		GO:0007242	SP:Q8TEQ0_HUMAN	IEA		P	NOT_ASSIGNED		transcript	taxon:13686	20060515	Uniprot
Uniprot	SiJWC06ADP.scf	SiJWC06ADP.scf		GO:0005524	SP:SNX23_HUMAN	IEA		F	NOT_ASSIGNED		transcript	taxon:13686	20060515	Uniprot
Uniprot	SiJWC06ADP.scf	SiJWC06ADP.scf		GO:0005875	SP:SNX23_HUMAN	IEA		C	NOT_ASSIGNED		transcript	taxon:13686	20060515	Uniprot
Uniprot	SiJWC06ADP.scf	SiJWC06ADP.scf		GO:0005515	SP:Q8TEQ0_HUMAN	IEA		F	NOT_ASSIGNED		transcript	taxon:13686	20060515	Uniprot
Uniprot	SiJWC06ADP.scf	SiJWC06ADP.scf		GO:0035091	SP:Q8TEQ0_HUMAN	IEA		F	NOT_ASSIGNED		transcript	taxon:13686	20060515	Uniprot
Uniprot	SiJWC06ADP.scf	SiJWC06ADP.scf		GO:0003777	SP:SNX23_HUMAN	IEA		F	NOT_ASSIGNED		transcript	taxon:13686	20060515	Uniprot
Uniprot	SI.CL.7.cl.745.Contig1	SI.CL.7.cl.745.Contig1		GO:0008152	SP:Q6DFP0_XENTR	IEA		P	NOT_ASSIGNED		transcript	taxon:13686	20060515	Uniprot
Uniprot	SI.CL.7.cl.745.Contig1	SI.CL.7.cl.745.Contig1		GO:0016491	SP:Q6DFP0_XENTR	IEA		F	NOT_ASSIGNED		transcript	taxon:13686	20060515	Uniprot
Uniprot	SiJWH07BAA2.scf	SiJWH07BAA2.scf		GO:0003964	SP:Q4QQD4_SCHMA	IEA		F	NOT_ASSIGNED		transcript	taxon:13686	20060515	Uniprot
Uniprot	SiJWH07BAA2.scf	SiJWH07BAA2.scf		GO:0003677	SP:Q4QQD4_SCHMA	IEA		F	NOT_ASSIGNED		transcript	taxon:13686	20060515	Uniprot
Uniprot	SiJWH07BAA2.scf	SiJWH07BAA2.scf		GO:0008233	SP:Q5TNP3_ANOGA	IEA		F	NOT_ASSIGNED		transcript	taxon:13686	20060515	Uniprot
Uniprot	SiJWH07BAA2.scf	SiJWH07BAA2.scf		GO:0006508	SP:Q5TNP3_ANOGA	IEA		P	NOT_ASSIGNED		transcript	taxon:13686	20060515	Uniprot
Uniprot	SiJWH07BAA2.scf	SiJWH07BAA2.scf		GO:0006278	SP:Q4QQD4_SCHMA	IEA		P	NOT_ASSIGNED		transcript	taxon:13686	20060515	Uniprot
Uniprot	SiJWH07BAA2.scf	SiJWH07BAA2.scf		GO:0004190	SP:Q5TNP3_ANOGA	IEA		F	NOT_ASSIGNED		transcript	taxon:13686	20060515	Uniprot
Uniprot	SiJWH07BAA2.scf	SiJWH07BAA2.scf		GO:0015074	SP:Q4QQD4_SCHMA	IEA		P	NOT_ASSIGNED		transcript	taxon:13686	20060515	Uniprot
Uniprot	SiJWH07BAA2.scf	SiJWH07BAA2.scf		GO:0003723	SP:Q4QQD4_SCHMA	IEA		F	NOT_ASSIGNED		transcript	taxon:13686	20060515	Uniprot
Uniprot	SI.CL.15.cl.1597.Contig1	SI.CL.15.cl.1597.Contig1		GO:0045946	SP:PABP1_HUMAN	IEA		P	NOT_ASSIGNED		transcript	taxon:13686	20060515	Uniprot
Uniprot	SI.CL.15.cl.1597.Contig1	SI.CL.15.cl.1597.Contig1		GO:0006378	SP:PABP1_HUMAN	IEA		P	NOT_ASSIGNED		transcript	taxon:13686	20060515	Uniprot
Uniprot	SI.CL.15.cl.1597.Contig1	SI.CL.15.cl.1597.Contig1		GO:0003676	SP:O57336_PETMA	IEA		F	NOT_ASSIGNED		transcript	taxon:13686	20060515	Uniprot
Uniprot	SI.CL.15.cl.1597.Contig1	SI.CL.15.cl.1597.Contig1		GO:0008143	SP:PABP1_HUMAN	IEA		F	NOT_ASSIGNED		transcript	taxon:13686	20060515	Uniprot
Uniprot	SI.CL.15.cl.1597.Contig1	SI.CL.15.cl.1597.Contig1		GO:0003723	SP:PABP1_HUMAN	IEA		F	NOT_ASSIGNED		transcript	taxon:13686	20060515	Uniprot
Uniprot	SI.CL.15.cl.1597.Contig1	SI.CL.15.cl.1597.Contig1		GO:0000166	SP:PABP1_HUMAN	IEA		F	NOT_ASSIGNED		transcript	taxon:13686	20060515	Uniprot
Uniprot	SI.CL.15.cl.1597.Contig1	SI.CL.15.cl.1597.Contig1		GO:0005737	SP:PABP1_HUMAN	IEA		C	NOT_ASSIGNED		transcript	taxon:13686	20060515	Uniprot
Uniprot	SI.CL.15.cl.1597.Contig1	SI.CL.15.cl.1597.Contig1		GO:0005515	SP:PABP1_HUMAN	IEA		F	NOT_ASSIGNED		transcript	taxon:13686	20060515	Uniprot
Uniprot	SI.CL.15.cl.1597.Contig1	SI.CL.15.cl.1597.Contig1		GO:0008494	SP:PABP1_HUMAN	IEA		F	NOT_ASSIGNED		transcript	taxon:13686	20060515	Uniprot
Uniprot	SI.CL.15.cl.1597.Contig1	SI.CL.15.cl.1597.Contig1		GO:0048255	SP:PABP1_HUMAN	IEA		P	NOT_ASSIGNED		transcript	taxon:13686	20060515	Uniprot
Uniprot	SiJWA09CAB.scf	SiJWA09CAB.scf		GO:0005634	SP:FKBP5_PONPY	IEA		C	NOT_ASSIGNED		transcript	taxon:13686	20060515	Uniprot
Uniprot	SiJWA09CAB.scf	SiJWA09CAB.scf		GO:0003755	SP:Q4REX5_TETNG	IEA		F	NOT_ASSIGNED		transcript	taxon:13686	20060515	Uniprot
Uniprot	SiJWA09CAB.scf	SiJWA09CAB.scf		GO:0005488	SP:Q4SC29_TETNG	IEA		F	NOT_ASSIGNED		transcript	taxon:13686	20060515	Uniprot
Uniprot	SiJWA09CAB.scf	SiJWA09CAB.scf		GO:0016853	SP:Q4REX5_TETNG	IEA		F	NOT_ASSIGNED		transcript	taxon:13686	20060515	Uniprot
Uniprot	SiJWA09CAB.scf	SiJWA09CAB.scf		GO:0006457	SP:Q4SC29_TETNG	IEA		P	NOT_ASSIGNED		transcript	taxon:13686	20060515	Uniprot
Uniprot	SiJWA09CAB.scf	SiJWA09CAB.scf		GO:0051082	SP:FKBP5_PONPY	IEA		F	NOT_ASSIGNED		transcript	taxon:13686	20060515	Uniprot
Uniprot	SiJWE08ACO.scf	SiJWE08ACO.scf		GO:0005634	SP:UBN1_HUMAN	IEA		C	NOT_ASSIGNED		transcript	taxon:13686	20060515	Uniprot
Uniprot	SiJWE08ACO.scf	SiJWE08ACO.scf		GO:0003824	SP:Q5ZJI1_CHICK	IEA		F	NOT_ASSIGNED		transcript	taxon:13686	20060515	Uniprot
Uniprot	SiJWB02BDZ.scf	SiJWB02BDZ.scf		GO:0000004	SP:Q99492_HUMAN	IEA		P	NOT_ASSIGNED		transcript	taxon:13686	20060515	Uniprot
Uniprot	SiJWB02BDZ.scf	SiJWB02BDZ.scf		GO:0006396	SP:Q5ZIS7_CHICK	IEA		P	NOT_ASSIGNED		transcript	taxon:13686	20060515	Uniprot
Uniprot	SiJWB02BDZ.scf	SiJWB02BDZ.scf		GO:0003676	SP:Q4T8U2_TETNG	IEA		F	NOT_ASSIGNED		transcript	taxon:13686	20060515	Uniprot
Uniprot	SiJWB02BDZ.scf	SiJWB02BDZ.scf		GO:0008372	SP:Q99492_HUMAN	IEA		C	NOT_ASSIGNED		transcript	taxon:13686	20060515	Uniprot
Uniprot	SiJWB02BDZ.scf	SiJWB02BDZ.scf		GO:0005554	SP:Q99492_HUMAN	IEA		F	NOT_ASSIGNED		transcript	taxon:13686	20060515	Uniprot
Uniprot	SiJWB02BDZ.scf	SiJWB02BDZ.scf		GO:0005622	SP:Q4T8U2_TETNG	IEA		C	NOT_ASSIGNED		transcript	taxon:13686	20060515	Uniprot
Uniprot	SiJWB02BDZ.scf	SiJWB02BDZ.scf		GO:0003723	SP:Q5ZIS7_CHICK	IEA		F	NOT_ASSIGNED		transcript	taxon:13686	20060515	Uniprot
Uniprot	SiJWG04BAT.scf	SiJWG04BAT.scf		GO:0003677	SP:Q8TBE0_HUMAN	IEA		F	NOT_ASSIGNED		transcript	taxon:13686	20060515	Uniprot
Uniprot	SI.CL.28.cl.2823.Contig1	SI.CL.28.cl.2823.Contig1		GO:0004386	SP:Q38QJ4_9VIRU	IEA		F	NOT_ASSIGNED		transcript	taxon:13686	20060515	Uniprot
Uniprot	SI.CL.28.cl.2823.Contig1	SI.CL.28.cl.2823.Contig1		GO:0003968	SP:O55319_BPAPS	IEA		F	NOT_ASSIGNED		transcript	taxon:13686	20060515	Uniprot
Uniprot	SI.CL.28.cl.2823.Contig1	SI.CL.28.cl.2823.Contig1		GO:0017111	SP:Q5U928_9CALI	IEA		F	NOT_ASSIGNED		transcript	taxon:13686	20060515	Uniprot
Uniprot	SI.CL.28.cl.2823.Contig1	SI.CL.28.cl.2823.Contig1		GO:0019079	SP:O55319_BPAPS	IEA		P	NOT_ASSIGNED		transcript	taxon:13686	20060515	Uniprot
Uniprot	SI.CL.28.cl.2823.Contig1	SI.CL.28.cl.2823.Contig1		GO:0003723	SP:O55319_BPAPS	IEA		F	NOT_ASSIGNED		transcript	taxon:13686	20060515	Uniprot
Uniprot	SI.CL.28.cl.2823.Contig1	SI.CL.28.cl.2823.Contig1		GO:0000166	SP:Q5U928_9CALI	IEA		F	NOT_ASSIGNED		transcript	taxon:13686	20060515	Uniprot
Uniprot	SI.CL.28.cl.2823.Contig1	SI.CL.28.cl.2823.Contig1		GO:0006916	SP:Q38QJ4_9VIRU	IEA		P	NOT_ASSIGNED		transcript	taxon:13686	20060515	Uniprot
Uniprot	SI.CL.28.cl.2823.Contig1	SI.CL.28.cl.2823.Contig1		GO:0004197	SP:Q38QJ4_9VIRU	IEA		F	NOT_ASSIGNED		transcript	taxon:13686	20060515	Uniprot
Uniprot	SI.CL.28.cl.2823.Contig1	SI.CL.28.cl.2823.Contig1		GO:0005524	SP:Q38QJ4_9VIRU	IEA		F	NOT_ASSIGNED		transcript	taxon:13686	20060515	Uniprot
Uniprot	SI.CL.28.cl.2823.Contig1	SI.CL.28.cl.2823.Contig1		GO:0003725	SP:O55319_BPAPS	IEA		F	NOT_ASSIGNED		transcript	taxon:13686	20060515	Uniprot
Uniprot	SI.CL.28.cl.2823.Contig1	SI.CL.28.cl.2823.Contig1		GO:0006350	SP:O55319_BPAPS	IEA		P	NOT_ASSIGNED		transcript	taxon:13686	20060515	Uniprot
Uniprot	SI.CL.28.cl.2823.Contig1	SI.CL.28.cl.2823.Contig1		GO:0006508	SP:Q38QJ4_9VIRU	IEA		P	NOT_ASSIGNED		transcript	taxon:13686	20060515	Uniprot
Uniprot	SI.CL.28.cl.2823.Contig1	SI.CL.28.cl.2823.Contig1		GO:0003724	SP:O55319_BPAPS	IEA		F	NOT_ASSIGNED		transcript	taxon:13686	20060515	Uniprot
Uniprot	SI.CL.28.cl.2823.Contig1	SI.CL.28.cl.2823.Contig1		GO:0005622	SP:O55319_BPAPS	IEA		C	NOT_ASSIGNED		transcript	taxon:13686	20060515	Uniprot
Uniprot	SiJWE12BBT.scf	SiJWE12BBT.scf		GO:0016020	SP:Q2LZ40_DROPS	IEA		C	NOT_ASSIGNED		transcript	taxon:13686	20060515	Uniprot
Uniprot	SiJWE12BBT.scf	SiJWE12BBT.scf		GO:0016757	SP:Q5CAS2_DROPS	IEA		F	NOT_ASSIGNED		transcript	taxon:13686	20060515	Uniprot
Uniprot	SiJWE12BBT.scf	SiJWE12BBT.scf		GO:0015018	SP:Q2LZ40_DROPS	IEA		F	NOT_ASSIGNED		transcript	taxon:13686	20060515	Uniprot
Uniprot	SiJWE12BBT.scf	SiJWE12BBT.scf		GO:0016740	SP:Q5CAS2_DROPS	IEA		F	NOT_ASSIGNED		transcript	taxon:13686	20060515	Uniprot
Uniprot	SiJWG12CAF2.scf	SiJWG12CAF2.scf		GO:0006986	SP:Q4R7N4_MACFA	IEA		P	NOT_ASSIGNED		transcript	taxon:13686	20060515	Uniprot
Uniprot	SiJWG12CAF2.scf	SiJWG12CAF2.scf		GO:0005634	SP:HSBP1_HUMAN	IEA		C	NOT_ASSIGNED		transcript	taxon:13686	20060515	Uniprot
Uniprot	SiJWG12CAF2.scf	SiJWG12CAF2.scf		GO:0000122	SP:HSBP1_HUMAN	IEA		P	NOT_ASSIGNED		transcript	taxon:13686	20060515	Uniprot
Uniprot	SiJWG12CAF2.scf	SiJWG12CAF2.scf		GO:0003714	SP:HSBP1_HUMAN	IEA		F	NOT_ASSIGNED		transcript	taxon:13686	20060515	Uniprot
Uniprot	SiJWG12CAF2.scf	SiJWG12CAF2.scf		GO:0006457	SP:Q4R7N4_MACFA	IEA		P	NOT_ASSIGNED		transcript	taxon:13686	20060515	Uniprot
Uniprot	SI.CL.9.cl.946.SiJWG04ADP.scf	SI.CL.9.cl.946.SiJWG04ADP.scf		GO:0000004	SP:Q04197_HUMAN	IEA		P	NOT_ASSIGNED		transcript	taxon:13686	20060515	Uniprot
Uniprot	SI.CL.9.cl.946.SiJWG04ADP.scf	SI.CL.9.cl.946.SiJWG04ADP.scf		GO:0005488	SP:Q5ZIG3_CHICK	IEA		F	NOT_ASSIGNED		transcript	taxon:13686	20060515	Uniprot
Uniprot	SI.CL.9.cl.946.SiJWG04ADP.scf	SI.CL.9.cl.946.SiJWG04ADP.scf		GO:0016020	SP:Q5ZIG3_CHICK	IEA		C	NOT_ASSIGNED		transcript	taxon:13686	20060515	Uniprot
Uniprot	SI.CL.9.cl.946.SiJWG04ADP.scf	SI.CL.9.cl.946.SiJWG04ADP.scf		GO:0008372	SP:Q04197_HUMAN	IEA		C	NOT_ASSIGNED		transcript	taxon:13686	20060515	Uniprot
Uniprot	SI.CL.9.cl.946.SiJWG04ADP.scf	SI.CL.9.cl.946.SiJWG04ADP.scf		GO:0005554	SP:Q04197_HUMAN	IEA		F	NOT_ASSIGNED		transcript	taxon:13686	20060515	Uniprot
Uniprot	SI.CL.9.cl.946.SiJWG04ADP.scf	SI.CL.9.cl.946.SiJWG04ADP.scf		GO:0016021	SP:Q5ZIG3_CHICK	IEA		C	NOT_ASSIGNED		transcript	taxon:13686	20060515	Uniprot
Uniprot	SI.CL.9.cl.946.SiJWG04ADP.scf	SI.CL.9.cl.946.SiJWG04ADP.scf		GO:0006810	SP:Q5ZIG3_CHICK	IEA		P	NOT_ASSIGNED		transcript	taxon:13686	20060515	Uniprot
Uniprot	SiJWG03BAM.scf	SiJWG03BAM.scf		GO:0005764	SP:LYPA3_HUMAN	IEA		C	NOT_ASSIGNED		transcript	taxon:13686	20060515	Uniprot
Uniprot	SiJWG03BAM.scf	SiJWG03BAM.scf		GO:0005543	SP:LYPA3_HUMAN	IEA		F	NOT_ASSIGNED		transcript	taxon:13686	20060515	Uniprot
Uniprot	SiJWG03BAM.scf	SiJWG03BAM.scf		GO:0008415	SP:LYPA3_HUMAN	IEA		F	NOT_ASSIGNED		transcript	taxon:13686	20060515	Uniprot
Uniprot	SiJWG03BAM.scf	SiJWG03BAM.scf		GO:0016787	SP:LYPA3_HUMAN	IEA		F	NOT_ASSIGNED		transcript	taxon:13686	20060515	Uniprot
Uniprot	SiJWG03BAM.scf	SiJWG03BAM.scf		GO:0009062	SP:LYPA3_HUMAN	IEA		P	NOT_ASSIGNED		transcript	taxon:13686	20060515	Uniprot
Uniprot	SiJWG03BAM.scf	SiJWG03BAM.scf		GO:0004607	SP:LYPA3_HUMAN	IEA		F	NOT_ASSIGNED		transcript	taxon:13686	20060515	Uniprot
Uniprot	SiJWG03BAM.scf	SiJWG03BAM.scf		GO:0004622	SP:LYPA3_HUMAN	IEA		F	NOT_ASSIGNED		transcript	taxon:13686	20060515	Uniprot
Uniprot	SiJWG03BAM.scf	SiJWG03BAM.scf		GO:0016740	SP:LYPA3_HUMAN	IEA		F	NOT_ASSIGNED		transcript	taxon:13686	20060515	Uniprot
Uniprot	SiJWG03BAM.scf	SiJWG03BAM.scf		GO:0006629	SP:LYPA3_HUMAN	IEA		P	NOT_ASSIGNED		transcript	taxon:13686	20060515	Uniprot
Uniprot	SI.CL.10.cl.1050.Contig1	SI.CL.10.cl.1050.Contig1		GO:0016020	SP:Q7PYC8_ANOGA	IEA		C	NOT_ASSIGNED		transcript	taxon:13686	20060515	Uniprot
Uniprot	SiJWC08ACF.scf	SiJWC08ACF.scf		GO:0006974	SP:ERCC3_MACFA	IEA		P	NOT_ASSIGNED		transcript	taxon:13686	20060515	Uniprot
Uniprot	SiJWC08ACF.scf	SiJWC08ACF.scf		GO:0005634	SP:Q2LZJ4_DROPS	IEA		C	NOT_ASSIGNED		transcript	taxon:13686	20060515	Uniprot
Uniprot	SiJWC08ACF.scf	SiJWC08ACF.scf		GO:0004386	SP:Q2LZJ4_DROPS	IEA		F	NOT_ASSIGNED		transcript	taxon:13686	20060515	Uniprot
Uniprot	SiJWC08ACF.scf	SiJWC08ACF.scf		GO:0003676	SP:Q2LZJ4_DROPS	IEA		F	NOT_ASSIGNED		transcript	taxon:13686	20060515	Uniprot
Uniprot	SiJWC08ACF.scf	SiJWC08ACF.scf		GO:0006289	SP:Q2LZJ4_DROPS	IEA		P	NOT_ASSIGNED		transcript	taxon:13686	20060515	Uniprot
Uniprot	SiJWC08ACF.scf	SiJWC08ACF.scf		GO:0006281	SP:ERCC3_MACFA	IEA		P	NOT_ASSIGNED		transcript	taxon:13686	20060515	Uniprot
Uniprot	SiJWC08ACF.scf	SiJWC08ACF.scf		GO:0000166	SP:ERCC3_MACFA	IEA		F	NOT_ASSIGNED		transcript	taxon:13686	20060515	Uniprot
Uniprot	SiJWC08ACF.scf	SiJWC08ACF.scf		GO:0006350	SP:ERCC3_MACFA	IEA		P	NOT_ASSIGNED		transcript	taxon:13686	20060515	Uniprot
Uniprot	SiJWC08ACF.scf	SiJWC08ACF.scf		GO:0003677	SP:Q2LZJ4_DROPS	IEA		F	NOT_ASSIGNED		transcript	taxon:13686	20060515	Uniprot
Uniprot	SiJWC08ACF.scf	SiJWC08ACF.scf		GO:0005524	SP:Q2LZJ4_DROPS	IEA		F	NOT_ASSIGNED		transcript	taxon:13686	20060515	Uniprot
Uniprot	SiJWC08ACF.scf	SiJWC08ACF.scf		GO:0016787	SP:ERCC3_MACFA	IEA		F	NOT_ASSIGNED		transcript	taxon:13686	20060515	Uniprot
Uniprot	SiJWC08ACF.scf	SiJWC08ACF.scf		GO:0004003	SP:Q2LZJ4_DROPS	IEA		F	NOT_ASSIGNED		transcript	taxon:13686	20060515	Uniprot
Uniprot	SiJWC08ACF.scf	SiJWC08ACF.scf		GO:0006355	SP:ERCC3_MACFA	IEA		P	NOT_ASSIGNED		transcript	taxon:13686	20060515	Uniprot
Uniprot	SI.CL.23.cl.2308.Contig1	SI.CL.23.cl.2308.Contig1		GO:0005634	SP:DKC1_CAEBR	IEA		C	NOT_ASSIGNED		transcript	taxon:13686	20060515	Uniprot
Uniprot	SI.CL.23.cl.2308.Contig1	SI.CL.23.cl.2308.Contig1		GO:0005730	SP:DKC1_HUMAN	IEA		C	NOT_ASSIGNED		transcript	taxon:13686	20060515	Uniprot
Uniprot	SI.CL.23.cl.2308.Contig1	SI.CL.23.cl.2308.Contig1		GO:0008283	SP:DKC1_HUMAN	IEA		P	NOT_ASSIGNED		transcript	taxon:13686	20060515	Uniprot
Uniprot	SI.CL.23.cl.2308.Contig1	SI.CL.23.cl.2308.Contig1		GO:0030529	SP:DKC1_CAEBR	IEA		C	NOT_ASSIGNED		transcript	taxon:13686	20060515	Uniprot
Uniprot	SI.CL.23.cl.2308.Contig1	SI.CL.23.cl.2308.Contig1		GO:0007046	SP:DKC1_CAEBR	IEA		P	NOT_ASSIGNED		transcript	taxon:13686	20060515	Uniprot
Uniprot	SI.CL.23.cl.2308.Contig1	SI.CL.23.cl.2308.Contig1		GO:0005697	SP:DKC1_HUMAN	IEA		C	NOT_ASSIGNED		transcript	taxon:13686	20060515	Uniprot
Uniprot	SI.CL.23.cl.2308.Contig1	SI.CL.23.cl.2308.Contig1		GO:0006364	SP:DKC1_HUMAN	IEA		P	NOT_ASSIGNED		transcript	taxon:13686	20060515	Uniprot
Uniprot	SI.CL.23.cl.2308.Contig1	SI.CL.23.cl.2308.Contig1		GO:0000074	SP:DKC1_HUMAN	IEA		P	NOT_ASSIGNED		transcript	taxon:13686	20060515	Uniprot
Uniprot	SI.CL.23.cl.2308.Contig1	SI.CL.23.cl.2308.Contig1		GO:0016853	SP:DKC1_HUMAN	IEA		F	NOT_ASSIGNED		transcript	taxon:13686	20060515	Uniprot
Uniprot	SI.CL.23.cl.2308.Contig1	SI.CL.23.cl.2308.Contig1		GO:0005654	SP:DKC1_HUMAN	IEA		C	NOT_ASSIGNED		transcript	taxon:13686	20060515	Uniprot
Uniprot	SI.CL.23.cl.2308.Contig1	SI.CL.23.cl.2308.Contig1		GO:0004730	SP:DKC1_HUMAN	IEA		F	NOT_ASSIGNED		transcript	taxon:13686	20060515	Uniprot
Uniprot	SI.CL.23.cl.2308.Contig1	SI.CL.23.cl.2308.Contig1		GO:0003723	SP:DKC1_HUMAN	IEA		F	NOT_ASSIGNED		transcript	taxon:13686	20060515	Uniprot
Uniprot	SI.CL.23.cl.2308.Contig1	SI.CL.23.cl.2308.Contig1		GO:0006396	SP:Q2VPE9_XENLA	IEA		P	NOT_ASSIGNED		transcript	taxon:13686	20060515	Uniprot
Uniprot	SI.CL.23.cl.2308.Contig1	SI.CL.23.cl.2308.Contig1		GO:0003720	SP:DKC1_HUMAN	IEA		F	NOT_ASSIGNED		transcript	taxon:13686	20060515	Uniprot
Uniprot	SI.CL.23.cl.2308.Contig1	SI.CL.23.cl.2308.Contig1		GO:0007004	SP:DKC1_HUMAN	IEA		P	NOT_ASSIGNED		transcript	taxon:13686	20060515	Uniprot
Uniprot	SiJWA10BAN.scf	SiJWA10BAN.scf		GO:0005739	SP:UQCR2_HUMAN	IEA		C	NOT_ASSIGNED		transcript	taxon:13686	20060515	Uniprot
Uniprot	SiJWA10BAN.scf	SiJWA10BAN.scf		GO:0004222	SP:UQCR2_HUMAN	IEA		F	NOT_ASSIGNED		transcript	taxon:13686	20060515	Uniprot
Uniprot	SiJWA10BAN.scf	SiJWA10BAN.scf		GO:0016020	SP:UQCR2_HUMAN	IEA		C	NOT_ASSIGNED		transcript	taxon:13686	20060515	Uniprot
Uniprot	SiJWA10BAN.scf	SiJWA10BAN.scf		GO:0016491	SP:UQCR2_HUMAN	IEA		F	NOT_ASSIGNED		transcript	taxon:13686	20060515	Uniprot
Uniprot	SiJWA10BAN.scf	SiJWA10BAN.scf		GO:0006119	SP:UQCR2_HUMAN	IEA		P	NOT_ASSIGNED		transcript	taxon:13686	20060515	Uniprot
Uniprot	SiJWA10BAN.scf	SiJWA10BAN.scf		GO:0005746	SP:UQCR2_HUMAN	IEA		C	NOT_ASSIGNED		transcript	taxon:13686	20060515	Uniprot
Uniprot	SiJWA10BAN.scf	SiJWA10BAN.scf		GO:0008121	SP:UQCR2_HUMAN	IEA		F	NOT_ASSIGNED		transcript	taxon:13686	20060515	Uniprot
Uniprot	SiJWA10BAN.scf	SiJWA10BAN.scf		GO:0006508	SP:UQCR2_HUMAN	IEA		P	NOT_ASSIGNED		transcript	taxon:13686	20060515	Uniprot
Uniprot	SiJWA10BAN.scf	SiJWA10BAN.scf		GO:0009060	SP:UQCR2_HUMAN	IEA		P	NOT_ASSIGNED		transcript	taxon:13686	20060515	Uniprot
Uniprot	SiJWA10BAN.scf	SiJWA10BAN.scf		GO:0006118	SP:UQCR2_HUMAN	IEA		P	NOT_ASSIGNED		transcript	taxon:13686	20060515	Uniprot
Uniprot	SI.CL.8.cl.893.Contig1	SI.CL.8.cl.893.Contig1		GO:0005344	SP:Q7Q7W5_ANOGA	IEA		F	NOT_ASSIGNED		transcript	taxon:13686	20060515	Uniprot
Uniprot	SI.CL.8.cl.893.Contig1	SI.CL.8.cl.893.Contig1		GO:0051084	SP:SEP15_HUMAN	IEA		P	NOT_ASSIGNED		transcript	taxon:13686	20060515	Uniprot
Uniprot	SI.CL.8.cl.893.Contig1	SI.CL.8.cl.893.Contig1		GO:0015671	SP:Q7Q7W5_ANOGA	IEA		P	NOT_ASSIGNED		transcript	taxon:13686	20060515	Uniprot
Uniprot	SI.CL.8.cl.893.Contig1	SI.CL.8.cl.893.Contig1		GO:0005783	SP:SEP15_ONCMY	IEA		C	NOT_ASSIGNED		transcript	taxon:13686	20060515	Uniprot
Uniprot	SI.CL.8.cl.893.Contig1	SI.CL.8.cl.893.Contig1		GO:0005788	SP:SEP15_HUMAN	IEA		C	NOT_ASSIGNED		transcript	taxon:13686	20060515	Uniprot
Uniprot	SI.CL.8.cl.893.Contig1	SI.CL.8.cl.893.Contig1		GO:0005515	SP:SEP15_HUMAN	IEA		F	NOT_ASSIGNED		transcript	taxon:13686	20060515	Uniprot
Uniprot	SI.CL.8.cl.893.Contig1	SI.CL.8.cl.893.Contig1		GO:0008430	SP:SEP15_HUMAN	IEA		F	NOT_ASSIGNED		transcript	taxon:13686	20060515	Uniprot
Uniprot	SiJWD05BBX.scf	SiJWD05BBX.scf		GO:0016020	SP:GNA1_HUMAN	IEA		C	NOT_ASSIGNED		transcript	taxon:13686	20060515	Uniprot
Uniprot	SiJWD05BBX.scf	SiJWD05BBX.scf		GO:0004343	SP:GNA1_HUMAN	IEA		F	NOT_ASSIGNED		transcript	taxon:13686	20060515	Uniprot
Uniprot	SiJWD05BBX.scf	SiJWD05BBX.scf		GO:0008080	SP:Q4SAJ2_TETNG	IEA		F	NOT_ASSIGNED		transcript	taxon:13686	20060515	Uniprot
Uniprot	SiJWD05BBX.scf	SiJWD05BBX.scf		GO:0016740	SP:GNA1_HUMAN	IEA		F	NOT_ASSIGNED		transcript	taxon:13686	20060515	Uniprot
Uniprot	SiJWD05BBX.scf	SiJWD05BBX.scf		GO:0008415	SP:GNA1_HUMAN	IEA		F	NOT_ASSIGNED		transcript	taxon:13686	20060515	Uniprot
Uniprot	SI.CL.5.cl.508.Contig1	SI.CL.5.cl.508.Contig1		GO:0004252	SP:O97097_ANOAQ	IEA		F	NOT_ASSIGNED		transcript	taxon:13686	20060515	Uniprot
Uniprot	SI.CL.5.cl.508.Contig1	SI.CL.5.cl.508.Contig1		GO:0016787	SP:O97097_ANOAQ	IEA		F	NOT_ASSIGNED		transcript	taxon:13686	20060515	Uniprot
Uniprot	SI.CL.5.cl.508.Contig1	SI.CL.5.cl.508.Contig1		GO:0008233	SP:O97097_ANOAQ	IEA		F	NOT_ASSIGNED		transcript	taxon:13686	20060515	Uniprot
Uniprot	SI.CL.5.cl.508.Contig1	SI.CL.5.cl.508.Contig1		GO:0006508	SP:O97097_ANOAQ	IEA		P	NOT_ASSIGNED		transcript	taxon:13686	20060515	Uniprot
Uniprot	SiJWD05BAK.scf	SiJWD05BAK.scf		GO:0016020	SP:GPT_HUMAN	IEA		C	NOT_ASSIGNED		transcript	taxon:13686	20060515	Uniprot
Uniprot	SiJWD05BAK.scf	SiJWD05BAK.scf		GO:0016021	SP:GPT_HUMAN	IEA		C	NOT_ASSIGNED		transcript	taxon:13686	20060515	Uniprot
Uniprot	SiJWD05BAK.scf	SiJWD05BAK.scf		GO:0016757	SP:GPT_HUMAN	IEA		F	NOT_ASSIGNED		transcript	taxon:13686	20060515	Uniprot
Uniprot	SiJWD05BAK.scf	SiJWD05BAK.scf		GO:0005783	SP:GPT_HUMAN	IEA		C	NOT_ASSIGNED		transcript	taxon:13686	20060515	Uniprot
Uniprot	SiJWD05BAK.scf	SiJWD05BAK.scf		GO:0003975	SP:GPT_HUMAN	IEA		F	NOT_ASSIGNED		transcript	taxon:13686	20060515	Uniprot
Uniprot	SiJWD05BAK.scf	SiJWD05BAK.scf		GO:0003824	SP:GPT_CRIGR	IEA		F	NOT_ASSIGNED		transcript	taxon:13686	20060515	Uniprot
Uniprot	SiJWD05BAK.scf	SiJWD05BAK.scf		GO:0006629	SP:GPT_HUMAN	IEA		P	NOT_ASSIGNED		transcript	taxon:13686	20060515	Uniprot
Uniprot	SiJWD05BAK.scf	SiJWD05BAK.scf		GO:0016740	SP:Q3T0F3_BOVIN	IEA		F	NOT_ASSIGNED		transcript	taxon:13686	20060515	Uniprot
Uniprot	SI.CL.10.cl.1024.Contig1	SI.CL.10.cl.1024.Contig1		GO:0045449	SP:Q8T0Y0_APICE	IEA		P	NOT_ASSIGNED		transcript	taxon:13686	20060515	Uniprot
Uniprot	SI.CL.10.cl.1024.Contig1	SI.CL.10.cl.1024.Contig1		GO:0005634	SP:Q6XL83_FORAU	IEA		C	NOT_ASSIGNED		transcript	taxon:13686	20060515	Uniprot
Uniprot	SI.CL.10.cl.1024.Contig1	SI.CL.10.cl.1024.Contig1		GO:0003677	SP:Q8T0Y0_APICE	IEA		F	NOT_ASSIGNED		transcript	taxon:13686	20060515	Uniprot
Uniprot	SI.CL.10.cl.1024.Contig1	SI.CL.10.cl.1024.Contig1		GO:0016787	SP:Q6XL83_FORAU	IEA		F	NOT_ASSIGNED		transcript	taxon:13686	20060515	Uniprot
Uniprot	SI.CL.10.cl.1024.Contig1	SI.CL.10.cl.1024.Contig1		GO:0004518	SP:Q6XL83_FORAU	IEA		F	NOT_ASSIGNED		transcript	taxon:13686	20060515	Uniprot
Uniprot	SiJWD11AAG.scf	SiJWD11AAG.scf		GO:0005634	SP:CPSF5_BOVIN	IEA		C	NOT_ASSIGNED		transcript	taxon:13686	20060515	Uniprot
Uniprot	SiJWD11AAG.scf	SiJWD11AAG.scf		GO:0006397	SP:CPSF5_BOVIN	IEA		P	NOT_ASSIGNED		transcript	taxon:13686	20060515	Uniprot
Uniprot	SiJWD11AAG.scf	SiJWD11AAG.scf		GO:0042382	SP:CPSF5_BOVIN	IEA		C	NOT_ASSIGNED		transcript	taxon:13686	20060515	Uniprot
Uniprot	SiJWD11AAG.scf	SiJWD11AAG.scf		GO:0005515	SP:CPSF5_BOVIN	IEA		F	NOT_ASSIGNED		transcript	taxon:13686	20060515	Uniprot
Uniprot	SiJWD11AAG.scf	SiJWD11AAG.scf		GO:0003723	SP:CPSF5_BOVIN	IEA		F	NOT_ASSIGNED		transcript	taxon:13686	20060515	Uniprot
Uniprot	SI.CL.25.cl.2583.Contig1	SI.CL.25.cl.2583.Contig1		GO:0000166	SP:XAB1_HUMAN	IEA		F	NOT_ASSIGNED		transcript	taxon:13686	20060515	Uniprot
Uniprot	SI.CL.25.cl.2583.Contig1	SI.CL.25.cl.2583.Contig1		GO:0007264	SP:XAB1_HUMAN	IEA		P	NOT_ASSIGNED		transcript	taxon:13686	20060515	Uniprot
Uniprot	SI.CL.25.cl.2583.Contig1	SI.CL.25.cl.2583.Contig1		GO:0005524	SP:XAB1_HUMAN	IEA		F	NOT_ASSIGNED		transcript	taxon:13686	20060515	Uniprot
Uniprot	SI.CL.25.cl.2583.Contig1	SI.CL.25.cl.2583.Contig1		GO:0017111	SP:XAB1_HUMAN	IEA		F	NOT_ASSIGNED		transcript	taxon:13686	20060515	Uniprot
Uniprot	SI.CL.25.cl.2583.Contig1	SI.CL.25.cl.2583.Contig1		GO:0005554	SP:XAB1_HUMAN	IEA		F	NOT_ASSIGNED		transcript	taxon:13686	20060515	Uniprot
Uniprot	SI.CL.25.cl.2583.Contig1	SI.CL.25.cl.2583.Contig1		GO:0005525	SP:XAB1_HUMAN	IEA		F	NOT_ASSIGNED		transcript	taxon:13686	20060515	Uniprot
Uniprot	SI.CL.30.cl.3079.Contig1	SI.CL.30.cl.3079.Contig1		GO:0003995	SP:ACOX3_HUMAN	IEA		F	NOT_ASSIGNED		transcript	taxon:13686	20060515	Uniprot
Uniprot	SI.CL.30.cl.3079.Contig1	SI.CL.30.cl.3079.Contig1		GO:0008206	SP:ACOX3_HUMAN	IEA		P	NOT_ASSIGNED		transcript	taxon:13686	20060515	Uniprot
Uniprot	SI.CL.30.cl.3079.Contig1	SI.CL.30.cl.3079.Contig1		GO:0050660	SP:ACOX3_HUMAN	IEA		F	NOT_ASSIGNED		transcript	taxon:13686	20060515	Uniprot
Uniprot	SI.CL.30.cl.3079.Contig1	SI.CL.30.cl.3079.Contig1		GO:0006635	SP:ACOX3_HUMAN	IEA		P	NOT_ASSIGNED		transcript	taxon:13686	20060515	Uniprot
Uniprot	SI.CL.30.cl.3079.Contig1	SI.CL.30.cl.3079.Contig1		GO:0016491	SP:ACOX3_HUMAN	IEA		F	NOT_ASSIGNED		transcript	taxon:13686	20060515	Uniprot
Uniprot	SI.CL.30.cl.3079.Contig1	SI.CL.30.cl.3079.Contig1		GO:0003997	SP:ACOX3_HUMAN	IEA		F	NOT_ASSIGNED		transcript	taxon:13686	20060515	Uniprot
Uniprot	SI.CL.30.cl.3079.Contig1	SI.CL.30.cl.3079.Contig1		GO:0005777	SP:ACOX3_HUMAN	IEA		C	NOT_ASSIGNED		transcript	taxon:13686	20060515	Uniprot
Uniprot	SI.CL.30.cl.3079.Contig1	SI.CL.30.cl.3079.Contig1		GO:0006631	SP:ACOX3_HUMAN	IEA		P	NOT_ASSIGNED		transcript	taxon:13686	20060515	Uniprot
Uniprot	SI.CL.30.cl.3079.Contig1	SI.CL.30.cl.3079.Contig1		GO:0006118	SP:ACOX3_HUMAN	IEA		P	NOT_ASSIGNED		transcript	taxon:13686	20060515	Uniprot
Uniprot	SI.CL.30.cl.3079.Contig1	SI.CL.30.cl.3079.Contig1		GO:0006629	SP:ACOX3_HUMAN	IEA		P	NOT_ASSIGNED		transcript	taxon:13686	20060515	Uniprot
Uniprot	SI.CL.17.cl.1757.Contig1	SI.CL.17.cl.1757.Contig1		GO:0008289	SP:ACBP_ANAPL	IEA		F	NOT_ASSIGNED		transcript	taxon:13686	20060515	Uniprot
Uniprot	SI.CL.17.cl.1757.Contig1	SI.CL.17.cl.1757.Contig1		GO:0004872	SP:Q6PBE8_XENTR	IEA		F	NOT_ASSIGNED		transcript	taxon:13686	20060515	Uniprot
Uniprot	SI.CL.17.cl.1757.Contig1	SI.CL.17.cl.1757.Contig1		GO:0006810	SP:ACBP_ANAPL	IEA		P	NOT_ASSIGNED		transcript	taxon:13686	20060515	Uniprot
Uniprot	SI.CL.17.cl.1757.Contig1	SI.CL.17.cl.1757.Contig1		GO:0000062	SP:Q8N6N7_HUMAN	IEA		F	NOT_ASSIGNED		transcript	taxon:13686	20060515	Uniprot
Uniprot	SI.CL.6.cl.658.Contig1	SI.CL.6.cl.658.Contig1		GO:0005694	SP:Q7QD75_ANOGA	IEA		C	NOT_ASSIGNED		transcript	taxon:13686	20060515	Uniprot
Uniprot	SI.CL.6.cl.658.Contig1	SI.CL.6.cl.658.Contig1		GO:0008113	SP:Q3AZT4_SYNS9	IEA		F	NOT_ASSIGNED		transcript	taxon:13686	20060515	Uniprot
Uniprot	SI.CL.6.cl.658.Contig1	SI.CL.6.cl.658.Contig1		GO:0005524	SP:Q7QD75_ANOGA	IEA		F	NOT_ASSIGNED		transcript	taxon:13686	20060515	Uniprot
Uniprot	SI.CL.6.cl.658.Contig1	SI.CL.6.cl.658.Contig1		GO:0051276	SP:Q7QD75_ANOGA	IEA		P	NOT_ASSIGNED		transcript	taxon:13686	20060515	Uniprot
Uniprot	SI.CL.6.cl.658.Contig1	SI.CL.6.cl.658.Contig1		GO:0016491	SP:Q3AZT4_SYNS9	IEA		F	NOT_ASSIGNED		transcript	taxon:13686	20060515	Uniprot
Uniprot	SiJWC11BDY.scf	SiJWC11BDY.scf		GO:0005634	SP:CNOT6_HUMAN	IEA		C	NOT_ASSIGNED		transcript	taxon:13686	20060515	Uniprot
Uniprot	SiJWC11BDY.scf	SiJWC11BDY.scf		GO:0006350	SP:CNOT6_HUMAN	IEA		P	NOT_ASSIGNED		transcript	taxon:13686	20060515	Uniprot
Uniprot	SiJWC11BDY.scf	SiJWC11BDY.scf		GO:0016787	SP:CNOT6_HUMAN	IEA		F	NOT_ASSIGNED		transcript	taxon:13686	20060515	Uniprot
Uniprot	SiJWC11BDY.scf	SiJWC11BDY.scf		GO:0006355	SP:CNOT6_HUMAN	IEA		P	NOT_ASSIGNED		transcript	taxon:13686	20060515	Uniprot
Uniprot	SiJWC11BDY.scf	SiJWC11BDY.scf		GO:0004527	SP:CNOT6_HUMAN	IEA		F	NOT_ASSIGNED		transcript	taxon:13686	20060515	Uniprot
Uniprot	SiJWC11BDY.scf	SiJWC11BDY.scf		GO:0003723	SP:CNOT6_HUMAN	IEA		F	NOT_ASSIGNED		transcript	taxon:13686	20060515	Uniprot
Uniprot	SiJWC11BDY.scf	SiJWC11BDY.scf		GO:0000287	SP:CNOT6_HUMAN	IEA		F	NOT_ASSIGNED		transcript	taxon:13686	20060515	Uniprot
Uniprot	SI.CL.29.cl.2987.Contig1	SI.CL.29.cl.2987.Contig1		GO:0005488	SP:Q5ZJV0_CHICK	IEA		F	NOT_ASSIGNED		transcript	taxon:13686	20060515	Uniprot
Uniprot	SI.CL.29.cl.2987.Contig1	SI.CL.29.cl.2987.Contig1		GO:0005515	SP:CSN4_HUMAN	IEA		F	NOT_ASSIGNED		transcript	taxon:13686	20060515	Uniprot
Uniprot	SI.CL.29.cl.2987.Contig1	SI.CL.29.cl.2987.Contig1		GO:0008180	SP:CSN4_HUMAN	IEA		C	NOT_ASSIGNED		transcript	taxon:13686	20060515	Uniprot
Uniprot	SI.CL.19.cl.1931.Contig1	SI.CL.19.cl.1931.Contig1		GO:0005375	SP:COPT1_HUMAN	IEA		F	NOT_ASSIGNED		transcript	taxon:13686	20060515	Uniprot
Uniprot	SI.CL.19.cl.1931.Contig1	SI.CL.19.cl.1931.Contig1		GO:0005507	SP:COPT1_HUMAN	IEA		F	NOT_ASSIGNED		transcript	taxon:13686	20060515	Uniprot
Uniprot	SI.CL.19.cl.1931.Contig1	SI.CL.19.cl.1931.Contig1		GO:0016020	SP:COPT1_HUMAN	IEA		C	NOT_ASSIGNED		transcript	taxon:13686	20060515	Uniprot
Uniprot	SI.CL.19.cl.1931.Contig1	SI.CL.19.cl.1931.Contig1		GO:0005887	SP:COPT1_HUMAN	IEA		C	NOT_ASSIGNED		transcript	taxon:13686	20060515	Uniprot
Uniprot	SI.CL.19.cl.1931.Contig1	SI.CL.19.cl.1931.Contig1		GO:0016021	SP:Q380T7_ANOGA	IEA		C	NOT_ASSIGNED		transcript	taxon:13686	20060515	Uniprot
Uniprot	SI.CL.19.cl.1931.Contig1	SI.CL.19.cl.1931.Contig1		GO:0006811	SP:COPT1_HUMAN	IEA		P	NOT_ASSIGNED		transcript	taxon:13686	20060515	Uniprot
Uniprot	SI.CL.19.cl.1931.Contig1	SI.CL.19.cl.1931.Contig1		GO:0006825	SP:COPT1_HUMAN	IEA		P	NOT_ASSIGNED		transcript	taxon:13686	20060515	Uniprot
Uniprot	SI.CL.14.cl.1422.Contig1	SI.CL.14.cl.1422.Contig1		GO:0003677	SP:Q560X5_CRYNE	IEA		F	NOT_ASSIGNED		transcript	taxon:13686	20060515	Uniprot
Uniprot	SI.CL.14.cl.1422.Contig1	SI.CL.14.cl.1422.Contig1		GO:0003713	SP:Q560X5_CRYNE	IEA		F	NOT_ASSIGNED		transcript	taxon:13686	20060515	Uniprot
Uniprot	SI.CL.14.cl.1422.Contig1	SI.CL.14.cl.1422.Contig1		GO:0006355	SP:Q560X5_CRYNE	IEA		P	NOT_ASSIGNED		transcript	taxon:13686	20060515	Uniprot
Uniprot	SiJWF09ACO.scf	SiJWF09ACO.scf		GO:0000166	SP:Q5TEV7_HUMAN	IEA		F	NOT_ASSIGNED		transcript	taxon:13686	20060515	Uniprot
Uniprot	SiJWF09ACO.scf	SiJWF09ACO.scf		GO:0007264	SP:Q5TEV7_HUMAN	IEA		P	NOT_ASSIGNED		transcript	taxon:13686	20060515	Uniprot
Uniprot	SiJWF09ACO.scf	SiJWF09ACO.scf		GO:0005525	SP:Q5TEV7_HUMAN	IEA		F	NOT_ASSIGNED		transcript	taxon:13686	20060515	Uniprot
Uniprot	SI.CL.4.cl.475.Contig1	SI.CL.4.cl.475.Contig1		GO:0003677	SP:O96968_BOMMO	IEA		F	NOT_ASSIGNED		transcript	taxon:13686	20060515	Uniprot
Uniprot	SI.CL.4.cl.475.Contig1	SI.CL.4.cl.475.Contig1		GO:0003676	SP:O96968_BOMMO	IEA		F	NOT_ASSIGNED		transcript	taxon:13686	20060515	Uniprot
Uniprot	SI.CL.4.cl.475.Contig1	SI.CL.4.cl.475.Contig1		GO:0008270	SP:O96968_BOMMO	IEA		F	NOT_ASSIGNED		transcript	taxon:13686	20060515	Uniprot
Uniprot	SI.CL.4.cl.475.Contig1	SI.CL.4.cl.475.Contig1		GO:0015074	SP:O96968_BOMMO	IEA		P	NOT_ASSIGNED		transcript	taxon:13686	20060515	Uniprot
Uniprot	SI.CL.12.cl.1282.Contig1	SI.CL.12.cl.1282.Contig1		GO:0005739	SP:COX15_HUMAN	IEA		C	NOT_ASSIGNED		transcript	taxon:13686	20060515	Uniprot
Uniprot	SI.CL.12.cl.1282.Contig1	SI.CL.12.cl.1282.Contig1		GO:0016020	SP:Q5TD01_HUMAN	IEA		C	NOT_ASSIGNED		transcript	taxon:13686	20060515	Uniprot
Uniprot	SI.CL.12.cl.1282.Contig1	SI.CL.12.cl.1282.Contig1		GO:0004129	SP:COX15_HUMAN	IEA		F	NOT_ASSIGNED		transcript	taxon:13686	20060515	Uniprot
Uniprot	SI.CL.12.cl.1282.Contig1	SI.CL.12.cl.1282.Contig1		GO:0016021	SP:COX15_HUMAN	IEA		C	NOT_ASSIGNED		transcript	taxon:13686	20060515	Uniprot
Uniprot	SI.CL.12.cl.1282.Contig1	SI.CL.12.cl.1282.Contig1		GO:0007585	SP:COX15_HUMAN	IEA		P	NOT_ASSIGNED		transcript	taxon:13686	20060515	Uniprot
Uniprot	SI.CL.12.cl.1282.Contig1	SI.CL.12.cl.1282.Contig1		GO:0006461	SP:Q5TD01_HUMAN	IEA		P	NOT_ASSIGNED		transcript	taxon:13686	20060515	Uniprot
Uniprot	SiJWC02CAV.scf	SiJWC02CAV.scf		GO:0005634	SP:SMBT1_HUMAN	IEA		C	NOT_ASSIGNED		transcript	taxon:13686	20060515	Uniprot
Uniprot	SiJWC02CAV.scf	SiJWC02CAV.scf		GO:0045449	SP:SMBT1_HUMAN	IEA		P	NOT_ASSIGNED		transcript	taxon:13686	20060515	Uniprot
Uniprot	SiJWF10ACV.scf	SiJWF10ACV.scf		GO:0045449	SP:Q5SW06_HUMAN	IEA		P	NOT_ASSIGNED		transcript	taxon:13686	20060515	Uniprot
Uniprot	SiJWF10ACV.scf	SiJWF10ACV.scf		GO:0003676	SP:Q5SW06_HUMAN	IEA		F	NOT_ASSIGNED		transcript	taxon:13686	20060515	Uniprot
Uniprot	SiJWF10ACV.scf	SiJWF10ACV.scf		GO:0005737	SP:Q5SW06_HUMAN	IEA		C	NOT_ASSIGNED		transcript	taxon:13686	20060515	Uniprot
Uniprot	SiJWF10ACV.scf	SiJWF10ACV.scf		GO:0006355	SP:ASCC1_HUMAN	IEA		P	NOT_ASSIGNED		transcript	taxon:13686	20060515	Uniprot
Uniprot	SI.CL.19.cl.1977.SiJWC02ABG.scf	SI.CL.19.cl.1977.SiJWC02ABG.scf		GO:0005634	SP:PRPK_HUMAN	IEA		C	NOT_ASSIGNED		transcript	taxon:13686	20060515	Uniprot
Uniprot	SI.CL.19.cl.1977.SiJWC02ABG.scf	SI.CL.19.cl.1977.SiJWC02ABG.scf		GO:0004713	SP:PRPK_HUMAN	IEA		F	NOT_ASSIGNED		transcript	taxon:13686	20060515	Uniprot
Uniprot	SI.CL.19.cl.1977.SiJWC02ABG.scf	SI.CL.19.cl.1977.SiJWC02ABG.scf		GO:0000166	SP:PRPK_HUMAN	IEA		F	NOT_ASSIGNED		transcript	taxon:13686	20060515	Uniprot
Uniprot	SI.CL.19.cl.1977.SiJWC02ABG.scf	SI.CL.19.cl.1977.SiJWC02ABG.scf		GO:0004674	SP:PRPK_HUMAN	IEA		F	NOT_ASSIGNED		transcript	taxon:13686	20060515	Uniprot
Uniprot	SI.CL.19.cl.1977.SiJWC02ABG.scf	SI.CL.19.cl.1977.SiJWC02ABG.scf		GO:0005524	SP:PRPK_HUMAN	IEA		F	NOT_ASSIGNED		transcript	taxon:13686	20060515	Uniprot
Uniprot	SI.CL.19.cl.1977.SiJWC02ABG.scf	SI.CL.19.cl.1977.SiJWC02ABG.scf		GO:0006468	SP:PRPK_HUMAN	IEA		P	NOT_ASSIGNED		transcript	taxon:13686	20060515	Uniprot
Uniprot	SI.CL.19.cl.1977.SiJWC02ABG.scf	SI.CL.19.cl.1977.SiJWC02ABG.scf		GO:0016301	SP:Q4T6Z8_TETNG	IEA		F	NOT_ASSIGNED		transcript	taxon:13686	20060515	Uniprot
Uniprot	SI.CL.19.cl.1977.SiJWC02ABG.scf	SI.CL.19.cl.1977.SiJWC02ABG.scf		GO:0005515	SP:PRPK_HUMAN	IEA		F	NOT_ASSIGNED		transcript	taxon:13686	20060515	Uniprot
Uniprot	SI.CL.19.cl.1977.SiJWC02ABG.scf	SI.CL.19.cl.1977.SiJWC02ABG.scf		GO:0005554	SP:PRPK_HUMAN	IEA		F	NOT_ASSIGNED		transcript	taxon:13686	20060515	Uniprot
Uniprot	SI.CL.19.cl.1977.SiJWC02ABG.scf	SI.CL.19.cl.1977.SiJWC02ABG.scf		GO:0004672	SP:Q4T6Z8_TETNG	IEA		F	NOT_ASSIGNED		transcript	taxon:13686	20060515	Uniprot
Uniprot	SI.CL.19.cl.1977.SiJWC02ABG.scf	SI.CL.19.cl.1977.SiJWC02ABG.scf		GO:0016740	SP:PRPK_HUMAN	IEA		F	NOT_ASSIGNED		transcript	taxon:13686	20060515	Uniprot
Uniprot	SiJWA08ADH.scf	SiJWA08ADH.scf		GO:0005739	SP:ACAD9_HUMAN	IEA		C	NOT_ASSIGNED		transcript	taxon:13686	20060515	Uniprot
Uniprot	SiJWA08ADH.scf	SiJWA08ADH.scf		GO:0003995	SP:ACAD9_HUMAN	IEA		F	NOT_ASSIGNED		transcript	taxon:13686	20060515	Uniprot
Uniprot	SiJWA08ADH.scf	SiJWA08ADH.scf		GO:0016491	SP:ACAD9_HUMAN	IEA		F	NOT_ASSIGNED		transcript	taxon:13686	20060515	Uniprot
Uniprot	SiJWA08ADH.scf	SiJWA08ADH.scf		GO:0006118	SP:ACAD9_HUMAN	IEA		P	NOT_ASSIGNED		transcript	taxon:13686	20060515	Uniprot
Uniprot	SI.CL.18.cl.1889.Contig1	SI.CL.18.cl.1889.Contig1		GO:0008152	SP:Q26653_SARPE	IEA		P	NOT_ASSIGNED		transcript	taxon:13686	20060515	Uniprot
Uniprot	SI.CL.18.cl.1889.Contig1	SI.CL.18.cl.1889.Contig1		GO:0016491	SP:Q26653_SARPE	IEA		F	NOT_ASSIGNED		transcript	taxon:13686	20060515	Uniprot
Uniprot	SI.CL.18.cl.1889.Contig1	SI.CL.18.cl.1889.Contig1		GO:0004022	SP:Q26653_SARPE	IEA		F	NOT_ASSIGNED		transcript	taxon:13686	20060515	Uniprot
Uniprot	SI.CL.14.cl.1427.Contig1	SI.CL.14.cl.1427.Contig1		GO:0046872	SP:PGM1_MACFA	IEA		F	NOT_ASSIGNED		transcript	taxon:13686	20060515	Uniprot
Uniprot	SI.CL.14.cl.1427.Contig1	SI.CL.14.cl.1427.Contig1		GO:0004614	SP:PGM1_HUMAN	IEA		F	NOT_ASSIGNED		transcript	taxon:13686	20060515	Uniprot
Uniprot	SI.CL.14.cl.1427.Contig1	SI.CL.14.cl.1427.Contig1		GO:0016853	SP:PGM1_HUMAN	IEA		F	NOT_ASSIGNED		transcript	taxon:13686	20060515	Uniprot
Uniprot	SI.CL.14.cl.1427.Contig1	SI.CL.14.cl.1427.Contig1		GO:0000287	SP:PGM1_HUMAN	IEA		F	NOT_ASSIGNED		transcript	taxon:13686	20060515	Uniprot
Uniprot	SI.CL.14.cl.1427.Contig1	SI.CL.14.cl.1427.Contig1		GO:0006006	SP:PGM1_HUMAN	IEA		P	NOT_ASSIGNED		transcript	taxon:13686	20060515	Uniprot
Uniprot	SI.CL.14.cl.1427.Contig1	SI.CL.14.cl.1427.Contig1		GO:0005737	SP:PGM1_HUMAN	IEA		C	NOT_ASSIGNED		transcript	taxon:13686	20060515	Uniprot
Uniprot	SI.CL.14.cl.1427.Contig1	SI.CL.14.cl.1427.Contig1		GO:0016868	SP:PGM1_MACFA	IEA		F	NOT_ASSIGNED		transcript	taxon:13686	20060515	Uniprot
Uniprot	SI.CL.14.cl.1427.Contig1	SI.CL.14.cl.1427.Contig1		GO:0005975	SP:PGM1_HUMAN	IEA		P	NOT_ASSIGNED		transcript	taxon:13686	20060515	Uniprot
Uniprot	SI.CL.16.cl.1683.SiJWF06BBE.scf	SI.CL.16.cl.1683.SiJWF06BBE.scf		GO:0030036	SP:ARC1A_HUMAN	IEA		P	NOT_ASSIGNED		transcript	taxon:13686	20060515	Uniprot
Uniprot	SI.CL.16.cl.1683.SiJWF06BBE.scf	SI.CL.16.cl.1683.SiJWF06BBE.scf		GO:0015629	SP:ARC1A_HUMAN	IEA		C	NOT_ASSIGNED		transcript	taxon:13686	20060515	Uniprot
Uniprot	SI.CL.16.cl.1683.SiJWF06BBE.scf	SI.CL.16.cl.1683.SiJWF06BBE.scf		GO:0003779	SP:ARC1A_HUMAN	IEA		F	NOT_ASSIGNED		transcript	taxon:13686	20060515	Uniprot
Uniprot	SiJWB01BCB2.scf	SiJWB01BCB2.scf		GO:0030036	SP:ROCK1_HUMAN	IEA		P	NOT_ASSIGNED		transcript	taxon:13686	20060515	Uniprot
Uniprot	SiJWB01BCB2.scf	SiJWB01BCB2.scf		GO:0019992	SP:ROCK1_RABIT	IEA		F	NOT_ASSIGNED		transcript	taxon:13686	20060515	Uniprot
Uniprot	SiJWB01BCB2.scf	SiJWB01BCB2.scf		GO:0005856	SP:ROCK1_RABIT	IEA		C	NOT_ASSIGNED		transcript	taxon:13686	20060515	Uniprot
Uniprot	SiJWB01BCB2.scf	SiJWB01BCB2.scf		GO:0046872	SP:ROCK1_RABIT	IEA		F	NOT_ASSIGNED		transcript	taxon:13686	20060515	Uniprot
Uniprot	SiJWB01BCB2.scf	SiJWB01BCB2.scf		GO:0000166	SP:O73732_XENLA	IEA		F	NOT_ASSIGNED		transcript	taxon:13686	20060515	Uniprot
Uniprot	SiJWB01BCB2.scf	SiJWB01BCB2.scf		GO:0004674	SP:O73732_XENLA	IEA		F	NOT_ASSIGNED		transcript	taxon:13686	20060515	Uniprot
Uniprot	SiJWB01BCB2.scf	SiJWB01BCB2.scf		GO:0016301	SP:O73732_XENLA	IEA		F	NOT_ASSIGNED		transcript	taxon:13686	20060515	Uniprot
Uniprot	SiJWB01BCB2.scf	SiJWB01BCB2.scf		GO:0004672	SP:O73732_XENLA	IEA		F	NOT_ASSIGNED		transcript	taxon:13686	20060515	Uniprot
Uniprot	SiJWB01BCB2.scf	SiJWB01BCB2.scf		GO:0007165	SP:O73732_XENLA	IEA		P	NOT_ASSIGNED		transcript	taxon:13686	20060515	Uniprot
Uniprot	SiJWB01BCB2.scf	SiJWB01BCB2.scf		GO:0005622	SP:O73732_XENLA	IEA		C	NOT_ASSIGNED		transcript	taxon:13686	20060515	Uniprot
Uniprot	SiJWB01BCB2.scf	SiJWB01BCB2.scf		GO:0016740	SP:O73732_XENLA	IEA		F	NOT_ASSIGNED		transcript	taxon:13686	20060515	Uniprot
Uniprot	SiJWB01BCB2.scf	SiJWB01BCB2.scf		GO:0015629	SP:ROCK2_HUMAN	IEA		C	NOT_ASSIGNED		transcript	taxon:13686	20060515	Uniprot
Uniprot	SiJWB01BCB2.scf	SiJWB01BCB2.scf		GO:0007266	SP:ROCK1_HUMAN	IEA		P	NOT_ASSIGNED		transcript	taxon:13686	20060515	Uniprot
Uniprot	SiJWB01BCB2.scf	SiJWB01BCB2.scf		GO:0006915	SP:ROCK1_RABIT	IEA		P	NOT_ASSIGNED		transcript	taxon:13686	20060515	Uniprot
Uniprot	SiJWB01BCB2.scf	SiJWB01BCB2.scf		GO:0005198	SP:ROCK2_HUMAN	IEA		F	NOT_ASSIGNED		transcript	taxon:13686	20060515	Uniprot
Uniprot	SiJWB01BCB2.scf	SiJWB01BCB2.scf		GO:0007242	SP:O73732_XENLA	IEA		P	NOT_ASSIGNED		transcript	taxon:13686	20060515	Uniprot
Uniprot	SiJWB01BCB2.scf	SiJWB01BCB2.scf		GO:0005524	SP:O73732_XENLA	IEA		F	NOT_ASSIGNED		transcript	taxon:13686	20060515	Uniprot
Uniprot	SiJWB01BCB2.scf	SiJWB01BCB2.scf		GO:0000910	SP:ROCK2_HUMAN	IEA		P	NOT_ASSIGNED		transcript	taxon:13686	20060515	Uniprot
Uniprot	SiJWB01BCB2.scf	SiJWB01BCB2.scf		GO:0006936	SP:ROCK2_HUMAN	IEA		P	NOT_ASSIGNED		transcript	taxon:13686	20060515	Uniprot
Uniprot	SiJWB01BCB2.scf	SiJWB01BCB2.scf		GO:0006468	SP:O73732_XENLA	IEA		P	NOT_ASSIGNED		transcript	taxon:13686	20060515	Uniprot
Uniprot	SiJWB01BCB2.scf	SiJWB01BCB2.scf		GO:0008270	SP:ROCK1_RABIT	IEA		F	NOT_ASSIGNED		transcript	taxon:13686	20060515	Uniprot
Uniprot	SiJWD01BBSR2F05.scf	SiJWD01BBSR2F05.scf		GO:0008134	SP:Q4RWQ6_TETNG	IEA		F	NOT_ASSIGNED		transcript	taxon:13686	20060515	Uniprot
Uniprot	SiJWD01BBSR2F05.scf	SiJWD01BBSR2F05.scf		GO:0016020	SP:RAB8B_HUMAN	IEA		C	NOT_ASSIGNED		transcript	taxon:13686	20060515	Uniprot
Uniprot	SiJWD01BBSR2F05.scf	SiJWD01BBSR2F05.scf		GO:0007046	SP:Q7PUB2_ANOGA	IEA		P	NOT_ASSIGNED		transcript	taxon:13686	20060515	Uniprot
Uniprot	SiJWD01BBSR2F05.scf	SiJWD01BBSR2F05.scf		GO:0006364	SP:Q7PUB2_ANOGA	IEA		P	NOT_ASSIGNED		transcript	taxon:13686	20060515	Uniprot
Uniprot	SiJWD01BBSR2F05.scf	SiJWD01BBSR2F05.scf		GO:0015031	SP:RAB8B_HUMAN	IEA		P	NOT_ASSIGNED		transcript	taxon:13686	20060515	Uniprot
Uniprot	SiJWD01BBSR2F05.scf	SiJWD01BBSR2F05.scf		GO:0005525	SP:RAB8B_HUMAN	IEA		F	NOT_ASSIGNED		transcript	taxon:13686	20060515	Uniprot
Uniprot	SiJWD01BBSR2F05.scf	SiJWD01BBSR2F05.scf		GO:0000166	SP:RAB8B_HUMAN	IEA		F	NOT_ASSIGNED		transcript	taxon:13686	20060515	Uniprot
Uniprot	SiJWD01BBSR2F05.scf	SiJWD01BBSR2F05.scf		GO:0007264	SP:RAB8B_HUMAN	IEA		P	NOT_ASSIGNED		transcript	taxon:13686	20060515	Uniprot
Uniprot	SiJWD01BBSR2F05.scf	SiJWD01BBSR2F05.scf		GO:0005524	SP:Q4RWQ6_TETNG	IEA		F	NOT_ASSIGNED		transcript	taxon:13686	20060515	Uniprot
Uniprot	SiJWD01BBSR2F05.scf	SiJWD01BBSR2F05.scf		GO:0000178	SP:Q7PUB2_ANOGA	IEA		C	NOT_ASSIGNED		transcript	taxon:13686	20060515	Uniprot
Uniprot	SiJWD01BBSR2F05.scf	SiJWD01BBSR2F05.scf		GO:0008372	SP:RAB8B_HUMAN	IEA		C	NOT_ASSIGNED		transcript	taxon:13686	20060515	Uniprot
Uniprot	SiJWD01BBSR2F05.scf	SiJWD01BBSR2F05.scf		GO:0006886	SP:Q7PUB2_ANOGA	IEA		P	NOT_ASSIGNED		transcript	taxon:13686	20060515	Uniprot
Uniprot	SiJWD01BBSR2F05.scf	SiJWD01BBSR2F05.scf		GO:0006355	SP:Q4RWQ6_TETNG	IEA		P	NOT_ASSIGNED		transcript	taxon:13686	20060515	Uniprot
Uniprot	SiJWD01BBSR2F05.scf	SiJWD01BBSR2F05.scf		GO:0005622	SP:Q4RWQ6_TETNG	IEA		C	NOT_ASSIGNED		transcript	taxon:13686	20060515	Uniprot
Uniprot	SiJWD01BBSR2F05.scf	SiJWD01BBSR2F05.scf		GO:0003924	SP:RAB8B_HUMAN	IEA		F	NOT_ASSIGNED		transcript	taxon:13686	20060515	Uniprot
Uniprot	SI.CL.10.cl.1012.SiJWH10ACW.scf	SI.CL.10.cl.1012.SiJWH10ACW.scf		GO:0005838	SP:PSD12_HUMAN	IEA		C	NOT_ASSIGNED		transcript	taxon:13686	20060515	Uniprot
Uniprot	SI.CL.10.cl.1012.SiJWH10ACW.scf	SI.CL.10.cl.1012.SiJWH10ACW.scf		GO:0005829	SP:PSD12_HUMAN	IEA		C	NOT_ASSIGNED		transcript	taxon:13686	20060515	Uniprot
Uniprot	SiJWD09ACH.scf	SiJWD09ACH.scf		GO:0005488	SP:Q8NEC0_HUMAN	IEA		F	NOT_ASSIGNED		transcript	taxon:13686	20060515	Uniprot
Uniprot	SI.CL.20.cl.2007.Contig1	SI.CL.20.cl.2007.Contig1		GO:0000502	SP:PSD4_HUMAN	IEA		C	NOT_ASSIGNED		transcript	taxon:13686	20060515	Uniprot
Uniprot	SI.CL.20.cl.2007.Contig1	SI.CL.20.cl.2007.Contig1		GO:0043234	SP:Q58DA0_BOVIN	IEA		C	NOT_ASSIGNED		transcript	taxon:13686	20060515	Uniprot
Uniprot	SI.CL.20.cl.2007.Contig1	SI.CL.20.cl.2007.Contig1		GO:0005829	SP:Q58DA0_BOVIN	IEA		C	NOT_ASSIGNED		transcript	taxon:13686	20060515	Uniprot
Uniprot	SI.CL.39.cl.3959.Contig1	SI.CL.39.cl.3959.Contig1		GO:0005634	SP:CRSP8_HUMAN	IEA		C	NOT_ASSIGNED		transcript	taxon:13686	20060515	Uniprot
Uniprot	SI.CL.39.cl.3959.Contig1	SI.CL.39.cl.3959.Contig1		GO:0006350	SP:CRSP8_HUMAN	IEA		P	NOT_ASSIGNED		transcript	taxon:13686	20060515	Uniprot
Uniprot	SI.CL.39.cl.3959.Contig1	SI.CL.39.cl.3959.Contig1		GO:0005515	SP:CRSP8_HUMAN	IEA		F	NOT_ASSIGNED		transcript	taxon:13686	20060515	Uniprot
Uniprot	SI.CL.39.cl.3959.Contig1	SI.CL.39.cl.3959.Contig1		GO:0006355	SP:CRSP8_HUMAN	IEA		P	NOT_ASSIGNED		transcript	taxon:13686	20060515	Uniprot
Uniprot	SiJWD01BCMR2H08.scf	SiJWD01BCMR2H08.scf		GO:0045061	SP:JAG2_HUMAN	IEA		P	NOT_ASSIGNED		transcript	taxon:13686	20060515	Uniprot
Uniprot	SiJWD01BCMR2H08.scf	SiJWD01BCMR2H08.scf		GO:0007219	SP:O42347_CHICK	IEA		P	NOT_ASSIGNED		transcript	taxon:13686	20060515	Uniprot
Uniprot	SiJWD01BCMR2H08.scf	SiJWD01BCMR2H08.scf		GO:0005509	SP:O42347_CHICK	IEA		F	NOT_ASSIGNED		transcript	taxon:13686	20060515	Uniprot
Uniprot	SiJWD01BCMR2H08.scf	SiJWD01BCMR2H08.scf		GO:0030217	SP:JAG2_HUMAN	IEA		P	NOT_ASSIGNED		transcript	taxon:13686	20060515	Uniprot
Uniprot	SiJWD01BCMR2H08.scf	SiJWD01BCMR2H08.scf		GO:0042127	SP:JAG2_HUMAN	IEA		P	NOT_ASSIGNED		transcript	taxon:13686	20060515	Uniprot
Uniprot	SiJWD01BCMR2H08.scf	SiJWD01BCMR2H08.scf		GO:0030326	SP:JAG2_HUMAN	IEA		P	NOT_ASSIGNED		transcript	taxon:13686	20060515	Uniprot
Uniprot	SiJWD01BCMR2H08.scf	SiJWD01BCMR2H08.scf		GO:0007283	SP:JAG2_HUMAN	IEA		P	NOT_ASSIGNED		transcript	taxon:13686	20060515	Uniprot
Uniprot	SiJWD01BCMR2H08.scf	SiJWD01BCMR2H08.scf		GO:0007049	SP:JAG2_HUMAN	IEA		P	NOT_ASSIGNED		transcript	taxon:13686	20060515	Uniprot
Uniprot	SiJWD01BCMR2H08.scf	SiJWD01BCMR2H08.scf		GO:0007275	SP:O42347_CHICK	IEA		P	NOT_ASSIGNED		transcript	taxon:13686	20060515	Uniprot
Uniprot	SiJWD01BCMR2H08.scf	SiJWD01BCMR2H08.scf		GO:0008083	SP:JAG2_HUMAN	IEA		F	NOT_ASSIGNED		transcript	taxon:13686	20060515	Uniprot
Uniprot	SiJWD01BCMR2H08.scf	SiJWD01BCMR2H08.scf		GO:0030334	SP:JAG2_HUMAN	IEA		P	NOT_ASSIGNED		transcript	taxon:13686	20060515	Uniprot
Uniprot	SiJWD01BCMR2H08.scf	SiJWD01BCMR2H08.scf		GO:0007154	SP:O42347_CHICK	IEA		P	NOT_ASSIGNED		transcript	taxon:13686	20060515	Uniprot
Uniprot	SiJWD01BCMR2H08.scf	SiJWD01BCMR2H08.scf		GO:0005112	SP:JAG2_HUMAN	IEA		F	NOT_ASSIGNED		transcript	taxon:13686	20060515	Uniprot
Uniprot	SiJWD01BCMR2H08.scf	SiJWD01BCMR2H08.scf		GO:0016020	SP:O42347_CHICK	IEA		C	NOT_ASSIGNED		transcript	taxon:13686	20060515	Uniprot
Uniprot	SiJWD01BCMR2H08.scf	SiJWD01BCMR2H08.scf		GO:0030154	SP:JAG2_HUMAN	IEA		P	NOT_ASSIGNED		transcript	taxon:13686	20060515	Uniprot
Uniprot	SiJWD01BCMR2H08.scf	SiJWD01BCMR2H08.scf		GO:0016021	SP:O42347_CHICK	IEA		C	NOT_ASSIGNED		transcript	taxon:13686	20060515	Uniprot
Uniprot	SiJWD01BCMR2H08.scf	SiJWD01BCMR2H08.scf		GO:0001709	SP:JAG2_HUMAN	IEA		P	NOT_ASSIGNED		transcript	taxon:13686	20060515	Uniprot
Uniprot	SiJWD01BCMR2H08.scf	SiJWD01BCMR2H08.scf		GO:0007267	SP:JAG2_HUMAN	IEA		P	NOT_ASSIGNED		transcript	taxon:13686	20060515	Uniprot
Uniprot	SiJWD01BCMR2H08.scf	SiJWD01BCMR2H08.scf		GO:0005887	SP:JAG2_HUMAN	IEA		C	NOT_ASSIGNED		transcript	taxon:13686	20060515	Uniprot
Uniprot	SiJWD01BCMR2H08.scf	SiJWD01BCMR2H08.scf		GO:0007605	SP:JAG2_HUMAN	IEA		P	NOT_ASSIGNED		transcript	taxon:13686	20060515	Uniprot
Uniprot	SiJWD01BCMR2H08.scf	SiJWD01BCMR2H08.scf		GO:0009912	SP:JAG2_HUMAN	IEA		P	NOT_ASSIGNED		transcript	taxon:13686	20060515	Uniprot
Uniprot	SiJWH10ADZ.scf	SiJWH10ADZ.scf		GO:0008233	SP:Q2U9B5_ASPOR	IEA		F	NOT_ASSIGNED		transcript	taxon:13686	20060515	Uniprot
Uniprot	SiJWH10ADZ.scf	SiJWH10ADZ.scf		GO:0008270	SP:Q2PYX9_SOLTU	IEA		F	NOT_ASSIGNED		transcript	taxon:13686	20060515	Uniprot
Uniprot	SiJWH10ADZ.scf	SiJWH10ADZ.scf		GO:0008237	SP:Q2U9B5_ASPOR	IEA		F	NOT_ASSIGNED		transcript	taxon:13686	20060515	Uniprot
Uniprot	SiJWH10ADZ.scf	SiJWH10ADZ.scf		GO:0006508	SP:Q2PYX9_SOLTU	IEA		P	NOT_ASSIGNED		transcript	taxon:13686	20060515	Uniprot
Uniprot	SiJWH10ADZ.scf	SiJWH10ADZ.scf		GO:0008450	SP:Q2PYX9_SOLTU	IEA		F	NOT_ASSIGNED		transcript	taxon:13686	20060515	Uniprot
Uniprot	SiJWB07BDS2.scf	SiJWB07BDS2.scf		GO:0015031	SP:ARF1_LOCMI	IEA		P	NOT_ASSIGNED		transcript	taxon:13686	20060515	Uniprot
Uniprot	SiJWB07BDS2.scf	SiJWB07BDS2.scf		GO:0005795	SP:ARF1_LOCMI	IEA		C	NOT_ASSIGNED		transcript	taxon:13686	20060515	Uniprot
Uniprot	SiJWB07BDS2.scf	SiJWB07BDS2.scf		GO:0007046	SP:Q2M0P5_DROPS	IEA		P	NOT_ASSIGNED		transcript	taxon:13686	20060515	Uniprot
Uniprot	SiJWB07BDS2.scf	SiJWB07BDS2.scf		GO:0006364	SP:Q5ZMA0_CHICK	IEA		P	NOT_ASSIGNED		transcript	taxon:13686	20060515	Uniprot
Uniprot	SiJWB07BDS2.scf	SiJWB07BDS2.scf		GO:0006888	SP:ARF1_LOCMI	IEA		P	NOT_ASSIGNED		transcript	taxon:13686	20060515	Uniprot
Uniprot	SiJWB07BDS2.scf	SiJWB07BDS2.scf		GO:0005525	SP:Q5ZMA0_CHICK	IEA		F	NOT_ASSIGNED		transcript	taxon:13686	20060515	Uniprot
Uniprot	SiJWB07BDS2.scf	SiJWB07BDS2.scf		GO:0000166	SP:ARF1_LOCMI	IEA		F	NOT_ASSIGNED		transcript	taxon:13686	20060515	Uniprot
Uniprot	SiJWB07BDS2.scf	SiJWB07BDS2.scf		GO:0007264	SP:Q5ZMA0_CHICK	IEA		P	NOT_ASSIGNED		transcript	taxon:13686	20060515	Uniprot
Uniprot	SiJWB07BDS2.scf	SiJWB07BDS2.scf		GO:0005622	SP:Q5ZMA0_CHICK	IEA		C	NOT_ASSIGNED		transcript	taxon:13686	20060515	Uniprot
Uniprot	SiJWB07BDS2.scf	SiJWB07BDS2.scf		GO:0006810	SP:ARF1_LOCMI	IEA		P	NOT_ASSIGNED		transcript	taxon:13686	20060515	Uniprot
Uniprot	SI.CL.20.cl.2083.Contig1	SI.CL.20.cl.2083.Contig1		GO:0005634	SP:Q5ZMB8_CHICK	IEA		C	NOT_ASSIGNED		transcript	taxon:13686	20060515	Uniprot
Uniprot	SI.CL.20.cl.2083.Contig1	SI.CL.20.cl.2083.Contig1		GO:0008233	SP:Q68ER4_XENTR	IEA		F	NOT_ASSIGNED		transcript	taxon:13686	20060515	Uniprot
Uniprot	SI.CL.20.cl.2083.Contig1	SI.CL.20.cl.2083.Contig1		GO:0017111	SP:Q5ZMB8_CHICK	IEA		F	NOT_ASSIGNED		transcript	taxon:13686	20060515	Uniprot
Uniprot	SI.CL.20.cl.2083.Contig1	SI.CL.20.cl.2083.Contig1		GO:0043234	SP:Q5ZMB8_CHICK	IEA		C	NOT_ASSIGNED		transcript	taxon:13686	20060515	Uniprot
Uniprot	SI.CL.20.cl.2083.Contig1	SI.CL.20.cl.2083.Contig1		GO:0030163	SP:Q5ZMB8_CHICK	IEA		P	NOT_ASSIGNED		transcript	taxon:13686	20060515	Uniprot
Uniprot	SI.CL.20.cl.2083.Contig1	SI.CL.20.cl.2083.Contig1		GO:0000166	SP:Q5ZMB8_CHICK	IEA		F	NOT_ASSIGNED		transcript	taxon:13686	20060515	Uniprot
Uniprot	SI.CL.20.cl.2083.Contig1	SI.CL.20.cl.2083.Contig1		GO:0005524	SP:Q5ZMB8_CHICK	IEA		F	NOT_ASSIGNED		transcript	taxon:13686	20060515	Uniprot
Uniprot	SI.CL.20.cl.2083.Contig1	SI.CL.20.cl.2083.Contig1		GO:0016787	SP:Q5ZMB8_CHICK	IEA		F	NOT_ASSIGNED		transcript	taxon:13686	20060515	Uniprot
Uniprot	SI.CL.20.cl.2083.Contig1	SI.CL.20.cl.2083.Contig1		GO:0005737	SP:PRS7_XENLA	IEA		C	NOT_ASSIGNED		transcript	taxon:13686	20060515	Uniprot
Uniprot	SI.CL.20.cl.2083.Contig1	SI.CL.20.cl.2083.Contig1		GO:0005829	SP:Q5ZMB8_CHICK	IEA		C	NOT_ASSIGNED		transcript	taxon:13686	20060515	Uniprot
Uniprot	SiJWH08ADA.scf	SiJWH08ADA.scf		GO:0005634	SP:TAF1_HUMAN	IEA		C	NOT_ASSIGNED		transcript	taxon:13686	20060515	Uniprot
Uniprot	SiJWH08ADA.scf	SiJWH08ADA.scf		GO:0046777	SP:TAF1_HUMAN	IEA		P	NOT_ASSIGNED		transcript	taxon:13686	20060515	Uniprot
Uniprot	SiJWH08ADA.scf	SiJWH08ADA.scf		GO:0004402	SP:TAF1_HUMAN	IEA		F	NOT_ASSIGNED		transcript	taxon:13686	20060515	Uniprot
Uniprot	SiJWH08ADA.scf	SiJWH08ADA.scf		GO:0006352	SP:TAF1_HUMAN	IEA		P	NOT_ASSIGNED		transcript	taxon:13686	20060515	Uniprot
Uniprot	SiJWH08ADA.scf	SiJWH08ADA.scf		GO:0000166	SP:TAF1_HUMAN	IEA		F	NOT_ASSIGNED		transcript	taxon:13686	20060515	Uniprot
Uniprot	SiJWH08ADA.scf	SiJWH08ADA.scf		GO:0004674	SP:TAF1_HUMAN	IEA		F	NOT_ASSIGNED		transcript	taxon:13686	20060515	Uniprot
Uniprot	SiJWH08ADA.scf	SiJWH08ADA.scf		GO:0006350	SP:TAF1_HUMAN	IEA		P	NOT_ASSIGNED		transcript	taxon:13686	20060515	Uniprot
Uniprot	SiJWH08ADA.scf	SiJWH08ADA.scf		GO:0003677	SP:TAF1_HUMAN	IEA		F	NOT_ASSIGNED		transcript	taxon:13686	20060515	Uniprot
Uniprot	SiJWH08ADA.scf	SiJWH08ADA.scf		GO:0005524	SP:TAF1_HUMAN	IEA		F	NOT_ASSIGNED		transcript	taxon:13686	20060515	Uniprot
Uniprot	SiJWH08ADA.scf	SiJWH08ADA.scf		GO:0007049	SP:TAF1_HUMAN	IEA		P	NOT_ASSIGNED		transcript	taxon:13686	20060515	Uniprot
Uniprot	SiJWH08ADA.scf	SiJWH08ADA.scf		GO:0005515	SP:TAF1_HUMAN	IEA		F	NOT_ASSIGNED		transcript	taxon:13686	20060515	Uniprot
Uniprot	SiJWH08ADA.scf	SiJWH08ADA.scf		GO:0006355	SP:TAF1_HUMAN	IEA		P	NOT_ASSIGNED		transcript	taxon:13686	20060515	Uniprot
Uniprot	SiJWH08ADA.scf	SiJWH08ADA.scf		GO:0005669	SP:TAF1_HUMAN	IEA		C	NOT_ASSIGNED		transcript	taxon:13686	20060515	Uniprot
Uniprot	SiJWH08ADA.scf	SiJWH08ADA.scf		GO:0016740	SP:TAF1_HUMAN	IEA		F	NOT_ASSIGNED		transcript	taxon:13686	20060515	Uniprot
Uniprot	SiJWH08ADA.scf	SiJWH08ADA.scf		GO:0000080	SP:TAF1_HUMAN	IEA		P	NOT_ASSIGNED		transcript	taxon:13686	20060515	Uniprot
Uniprot	SI.CL.1.cl.194.SiJWB08ABQ.scf	SI.CL.1.cl.194.SiJWB08ABQ.scf		GO:0005739	SP:Q45GB2_9NEOP	IEA		C	NOT_ASSIGNED		transcript	taxon:13686	20060515	Uniprot
Uniprot	SI.CL.1.cl.194.SiJWB08ABQ.scf	SI.CL.1.cl.194.SiJWB08ABQ.scf		GO:0016469	SP:Q45GB2_9NEOP	IEA		C	NOT_ASSIGNED		transcript	taxon:13686	20060515	Uniprot
Uniprot	SI.CL.1.cl.194.SiJWB08ABQ.scf	SI.CL.1.cl.194.SiJWB08ABQ.scf		GO:0016820	SP:Q45GB2_9NEOP	IEA		F	NOT_ASSIGNED		transcript	taxon:13686	20060515	Uniprot
Uniprot	SI.CL.1.cl.194.SiJWB08ABQ.scf	SI.CL.1.cl.194.SiJWB08ABQ.scf		GO:0016020	SP:Q45GB2_9NEOP	IEA		C	NOT_ASSIGNED		transcript	taxon:13686	20060515	Uniprot
Uniprot	SI.CL.1.cl.194.SiJWB08ABQ.scf	SI.CL.1.cl.194.SiJWB08ABQ.scf		GO:0015992	SP:Q45GB2_9NEOP	IEA		P	NOT_ASSIGNED		transcript	taxon:13686	20060515	Uniprot
Uniprot	SiJWG11AA1_evro_H06_3prime.scf	SiJWG11AA1_evro_H06_3prime.scf		GO:0008047	SP:ULE1B_HUMAN	IEA		F	NOT_ASSIGNED		transcript	taxon:13686	20060515	Uniprot
Uniprot	SiJWG11AA1_evro_H06_3prime.scf	SiJWG11AA1_evro_H06_3prime.scf		GO:0006464	SP:Q4TBS5_TETNG	IEA		P	NOT_ASSIGNED		transcript	taxon:13686	20060515	Uniprot
Uniprot	SiJWG11AA1_evro_H06_3prime.scf	SiJWG11AA1_evro_H06_3prime.scf		GO:0008642	SP:ULE1B_HUMAN	IEA		F	NOT_ASSIGNED		transcript	taxon:13686	20060515	Uniprot
Uniprot	SiJWG11AA1_evro_H06_3prime.scf	SiJWG11AA1_evro_H06_3prime.scf		GO:0015031	SP:Q7Q8G9_ANOGA	IEA		P	NOT_ASSIGNED		transcript	taxon:13686	20060515	Uniprot
Uniprot	SiJWG11AA1_evro_H06_3prime.scf	SiJWG11AA1_evro_H06_3prime.scf		GO:0016874	SP:ULE1B_HUMAN	IEA		F	NOT_ASSIGNED		transcript	taxon:13686	20060515	Uniprot
Uniprot	SiJWG11AA1_evro_H06_3prime.scf	SiJWG11AA1_evro_H06_3prime.scf		GO:0006512	SP:ULE1B_HUMAN	IEA		P	NOT_ASSIGNED		transcript	taxon:13686	20060515	Uniprot
Uniprot	SiJWG11AA1_evro_H06_3prime.scf	SiJWG11AA1_evro_H06_3prime.scf		GO:0000166	SP:ULE1B_HUMAN	IEA		F	NOT_ASSIGNED		transcript	taxon:13686	20060515	Uniprot
Uniprot	SiJWG11AA1_evro_H06_3prime.scf	SiJWG11AA1_evro_H06_3prime.scf		GO:0005524	SP:ULE1B_HUMAN	IEA		F	NOT_ASSIGNED		transcript	taxon:13686	20060515	Uniprot
Uniprot	SiJWG11AA1_evro_H06_3prime.scf	SiJWG11AA1_evro_H06_3prime.scf		GO:0006914	SP:Q7Q8G9_ANOGA	IEA		P	NOT_ASSIGNED		transcript	taxon:13686	20060515	Uniprot
Uniprot	SiJWG11AA1_evro_H06_3prime.scf	SiJWG11AA1_evro_H06_3prime.scf		GO:0003824	SP:Q642Q1_XENLA	IEA		F	NOT_ASSIGNED		transcript	taxon:13686	20060515	Uniprot
Uniprot	SiJWG11AA1_evro_H06_3prime.scf	SiJWG11AA1_evro_H06_3prime.scf		GO:0006810	SP:Q7Q8G9_ANOGA	IEA		P	NOT_ASSIGNED		transcript	taxon:13686	20060515	Uniprot
Uniprot	SiJWG11AA1_evro_H06_3prime.scf	SiJWG11AA1_evro_H06_3prime.scf		GO:0004839	SP:ULE1B_HUMAN	IEA		F	NOT_ASSIGNED		transcript	taxon:13686	20060515	Uniprot
Uniprot	SI.CL.36.cl.3623.Contig1	SI.CL.36.cl.3623.Contig1		GO:0005874	SP:DYLX_BOVIN	IEA		C	NOT_ASSIGNED		transcript	taxon:13686	20060515	Uniprot
Uniprot	SI.CL.36.cl.3623.Contig1	SI.CL.36.cl.3623.Contig1		GO:0005868	SP:DYLX_BOVIN	IEA		C	NOT_ASSIGNED		transcript	taxon:13686	20060515	Uniprot
Uniprot	SI.CL.36.cl.3623.Contig1	SI.CL.36.cl.3623.Contig1		GO:0003777	SP:DYLX_BOVIN	IEA		F	NOT_ASSIGNED		transcript	taxon:13686	20060515	Uniprot
Uniprot	SI.CL.41.cl.4101.Contig1	SI.CL.41.cl.4101.Contig1		GO:0005744	SP:TI17B_HUMAN	IEA		C	NOT_ASSIGNED		transcript	taxon:13686	20060515	Uniprot
Uniprot	SI.CL.41.cl.4101.Contig1	SI.CL.41.cl.4101.Contig1		GO:0005739	SP:TI17B_HUMAN	IEA		C	NOT_ASSIGNED		transcript	taxon:13686	20060515	Uniprot
Uniprot	SI.CL.41.cl.4101.Contig1	SI.CL.41.cl.4101.Contig1		GO:0008565	SP:Q2VPP8_XENLA	IEA		F	NOT_ASSIGNED		transcript	taxon:13686	20060515	Uniprot
Uniprot	SI.CL.41.cl.4101.Contig1	SI.CL.41.cl.4101.Contig1		GO:0016020	SP:TI17B_HUMAN	IEA		C	NOT_ASSIGNED		transcript	taxon:13686	20060515	Uniprot
Uniprot	SI.CL.41.cl.4101.Contig1	SI.CL.41.cl.4101.Contig1		GO:0015031	SP:Q2VPP8_XENLA	IEA		P	NOT_ASSIGNED		transcript	taxon:13686	20060515	Uniprot
Uniprot	SI.CL.41.cl.4101.Contig1	SI.CL.41.cl.4101.Contig1		GO:0005743	SP:Q2VPP8_XENLA	IEA		C	NOT_ASSIGNED		transcript	taxon:13686	20060515	Uniprot
Uniprot	SI.CL.41.cl.4101.Contig1	SI.CL.41.cl.4101.Contig1		GO:0016021	SP:TI17B_HUMAN	IEA		C	NOT_ASSIGNED		transcript	taxon:13686	20060515	Uniprot
Uniprot	SI.CL.41.cl.4101.Contig1	SI.CL.41.cl.4101.Contig1		GO:0015450	SP:TI17B_HUMAN	IEA		F	NOT_ASSIGNED		transcript	taxon:13686	20060515	Uniprot
Uniprot	SI.CL.41.cl.4101.Contig1	SI.CL.41.cl.4101.Contig1		GO:0006626	SP:TI17B_HUMAN	IEA		P	NOT_ASSIGNED		transcript	taxon:13686	20060515	Uniprot
Uniprot	SI.CL.41.cl.4101.Contig1	SI.CL.41.cl.4101.Contig1		GO:0006886	SP:Q2VPP8_XENLA	IEA		P	NOT_ASSIGNED		transcript	taxon:13686	20060515	Uniprot
Uniprot	SI.CL.5.cl.535.Contig1	SI.CL.5.cl.535.Contig1		GO:0005739	SP:NUIM_HUMAN	IEA		C	NOT_ASSIGNED		transcript	taxon:13686	20060515	Uniprot
Uniprot	SI.CL.5.cl.535.Contig1	SI.CL.5.cl.535.Contig1		GO:0046872	SP:NUIM_HUMAN	IEA		F	NOT_ASSIGNED		transcript	taxon:13686	20060515	Uniprot
Uniprot	SI.CL.5.cl.535.Contig1	SI.CL.5.cl.535.Contig1		GO:0008137	SP:NUIM_HUMAN	IEA		F	NOT_ASSIGNED		transcript	taxon:13686	20060515	Uniprot
Uniprot	SI.CL.5.cl.535.Contig1	SI.CL.5.cl.535.Contig1		GO:0016491	SP:NUIM_MACFA	IEA		F	NOT_ASSIGNED		transcript	taxon:13686	20060515	Uniprot
Uniprot	SI.CL.5.cl.535.Contig1	SI.CL.5.cl.535.Contig1		GO:0005624	SP:NUIM_HUMAN	IEA		C	NOT_ASSIGNED		transcript	taxon:13686	20060515	Uniprot
Uniprot	SI.CL.5.cl.535.Contig1	SI.CL.5.cl.535.Contig1		GO:0003954	SP:NUIM_HUMAN	IEA		F	NOT_ASSIGNED		transcript	taxon:13686	20060515	Uniprot
Uniprot	SI.CL.5.cl.535.Contig1	SI.CL.5.cl.535.Contig1		GO:0006120	SP:NUIM_HUMAN	IEA		P	NOT_ASSIGNED		transcript	taxon:13686	20060515	Uniprot
Uniprot	SI.CL.5.cl.535.Contig1	SI.CL.5.cl.535.Contig1		GO:0051539	SP:NUIM_HUMAN	IEA		F	NOT_ASSIGNED		transcript	taxon:13686	20060515	Uniprot
Uniprot	SI.CL.5.cl.535.Contig1	SI.CL.5.cl.535.Contig1		GO:0016651	SP:NUIM_MACFA	IEA		F	NOT_ASSIGNED		transcript	taxon:13686	20060515	Uniprot
Uniprot	SI.CL.5.cl.535.Contig1	SI.CL.5.cl.535.Contig1		GO:0005506	SP:NUIM_HUMAN	IEA		F	NOT_ASSIGNED		transcript	taxon:13686	20060515	Uniprot
Uniprot	SI.CL.5.cl.535.Contig1	SI.CL.5.cl.535.Contig1		GO:0051536	SP:NUIM_MACFA	IEA		F	NOT_ASSIGNED		transcript	taxon:13686	20060515	Uniprot
Uniprot	SI.CL.5.cl.535.Contig1	SI.CL.5.cl.535.Contig1		GO:0006118	SP:NUIM_HUMAN	IEA		P	NOT_ASSIGNED		transcript	taxon:13686	20060515	Uniprot
Uniprot	SI.CL.4.cl.442.Contig1	SI.CL.4.cl.442.Contig1		GO:0005634	SP:Q6GLB2_XENTR	IEA		C	NOT_ASSIGNED		transcript	taxon:13686	20060515	Uniprot
Uniprot	SI.CL.4.cl.442.Contig1	SI.CL.4.cl.442.Contig1		GO:0003676	SP:IF1AX_PONPY	IEA		F	NOT_ASSIGNED		transcript	taxon:13686	20060515	Uniprot
Uniprot	SI.CL.4.cl.442.Contig1	SI.CL.4.cl.442.Contig1		GO:0006412	SP:IF1AX_HUMAN	IEA		P	NOT_ASSIGNED		transcript	taxon:13686	20060515	Uniprot
Uniprot	SI.CL.4.cl.442.Contig1	SI.CL.4.cl.442.Contig1		GO:0003743	SP:Q32LC3_BOVIN	IEA		F	NOT_ASSIGNED		transcript	taxon:13686	20060515	Uniprot
Uniprot	SI.CL.4.cl.442.Contig1	SI.CL.4.cl.442.Contig1		GO:0006413	SP:Q32LC3_BOVIN	IEA		P	NOT_ASSIGNED		transcript	taxon:13686	20060515	Uniprot
Uniprot	SI.CL.4.cl.442.Contig1	SI.CL.4.cl.442.Contig1		GO:0016281	SP:IF1AX_HUMAN	IEA		C	NOT_ASSIGNED		transcript	taxon:13686	20060515	Uniprot
Uniprot	SI.CL.4.cl.442.Contig1	SI.CL.4.cl.442.Contig1		GO:0003723	SP:Q32LC3_BOVIN	IEA		F	NOT_ASSIGNED		transcript	taxon:13686	20060515	Uniprot
Uniprot	SI.CL.28.cl.2833.Contig1	SI.CL.28.cl.2833.Contig1		GO:0016020	SP:Q69HP4_CIOIN	IEA		C	NOT_ASSIGNED		transcript	taxon:13686	20060515	Uniprot
Uniprot	SI.CL.28.cl.2833.Contig1	SI.CL.28.cl.2833.Contig1		GO:0005261	SP:Q69HP4_CIOIN	IEA		F	NOT_ASSIGNED		transcript	taxon:13686	20060515	Uniprot
Uniprot	SI.CL.28.cl.2833.Contig1	SI.CL.28.cl.2833.Contig1		GO:0016021	SP:Q69HP4_CIOIN	IEA		C	NOT_ASSIGNED		transcript	taxon:13686	20060515	Uniprot
Uniprot	SI.CL.28.cl.2833.Contig1	SI.CL.28.cl.2833.Contig1		GO:0006812	SP:Q69HP4_CIOIN	IEA		P	NOT_ASSIGNED		transcript	taxon:13686	20060515	Uniprot
Uniprot	SI.CL.28.cl.2833.Contig1	SI.CL.28.cl.2833.Contig1		GO:0006811	SP:Q69HP4_CIOIN	IEA		P	NOT_ASSIGNED		transcript	taxon:13686	20060515	Uniprot
Uniprot	SI.CL.28.cl.2833.Contig1	SI.CL.28.cl.2833.Contig1		GO:0006810	SP:Q69HP4_CIOIN	IEA		P	NOT_ASSIGNED		transcript	taxon:13686	20060515	Uniprot
Uniprot	SI.CL.28.cl.2833.Contig1	SI.CL.28.cl.2833.Contig1		GO:0005216	SP:Q69HP4_CIOIN	IEA		F	NOT_ASSIGNED		transcript	taxon:13686	20060515	Uniprot
Uniprot	SI.CL.2.cl.296.SiJWF01BCG1.scf	SI.CL.2.cl.296.SiJWF01BCG1.scf		GO:0016020	SP:TM14C_HUMAN	IEA		C	NOT_ASSIGNED		transcript	taxon:13686	20060515	Uniprot
Uniprot	SI.CL.2.cl.296.SiJWF01BCG1.scf	SI.CL.2.cl.296.SiJWF01BCG1.scf		GO:0005554	SP:TM14C_HUMAN	IEA		F	NOT_ASSIGNED		transcript	taxon:13686	20060515	Uniprot
Uniprot	SI.CL.2.cl.296.SiJWF01BCG1.scf	SI.CL.2.cl.296.SiJWF01BCG1.scf		GO:0016021	SP:TM14C_HUMAN	IEA		C	NOT_ASSIGNED		transcript	taxon:13686	20060515	Uniprot
Uniprot	SiJWA10AAM.scf	SiJWA10AAM.scf		GO:0043565	SP:Q2V894_STRPU	IEA		F	NOT_ASSIGNED		transcript	taxon:13686	20060515	Uniprot
Uniprot	SiJWA10AAM.scf	SiJWA10AAM.scf		GO:0005634	SP:Q2V894_STRPU	IEA		C	NOT_ASSIGNED		transcript	taxon:13686	20060515	Uniprot
Uniprot	SiJWA10AAM.scf	SiJWA10AAM.scf		GO:0006350	SP:Q61E38_CAEBR	IEA		P	NOT_ASSIGNED		transcript	taxon:13686	20060515	Uniprot
Uniprot	SiJWA10AAM.scf	SiJWA10AAM.scf		GO:0003677	SP:Q61E38_CAEBR	IEA		F	NOT_ASSIGNED		transcript	taxon:13686	20060515	Uniprot
Uniprot	SiJWA10AAM.scf	SiJWA10AAM.scf		GO:0003700	SP:Q2V894_STRPU	IEA		F	NOT_ASSIGNED		transcript	taxon:13686	20060515	Uniprot
Uniprot	SiJWA10AAM.scf	SiJWA10AAM.scf		GO:0006355	SP:Q2V894_STRPU	IEA		P	NOT_ASSIGNED		transcript	taxon:13686	20060515	Uniprot
Uniprot	SI.CL.17.cl.1755.Contig1	SI.CL.17.cl.1755.Contig1		GO:0004674	SP:MP2K2_XENLA	IEA		F	NOT_ASSIGNED		transcript	taxon:13686	20060515	Uniprot
Uniprot	SI.CL.17.cl.1755.Contig1	SI.CL.17.cl.1755.Contig1		GO:0000166	SP:MP2K2_XENLA	IEA		F	NOT_ASSIGNED		transcript	taxon:13686	20060515	Uniprot
Uniprot	SI.CL.17.cl.1755.Contig1	SI.CL.17.cl.1755.Contig1		GO:0005524	SP:MP2K2_XENLA	IEA		F	NOT_ASSIGNED		transcript	taxon:13686	20060515	Uniprot
Uniprot	SI.CL.17.cl.1755.Contig1	SI.CL.17.cl.1755.Contig1		GO:0006468	SP:MP2K2_XENLA	IEA		P	NOT_ASSIGNED		transcript	taxon:13686	20060515	Uniprot
Uniprot	SI.CL.17.cl.1755.Contig1	SI.CL.17.cl.1755.Contig1		GO:0004713	SP:MP2K2_XENLA	IEA		F	NOT_ASSIGNED		transcript	taxon:13686	20060515	Uniprot
Uniprot	SI.CL.17.cl.1755.Contig1	SI.CL.17.cl.1755.Contig1		GO:0016301	SP:MP2K2_XENLA	IEA		F	NOT_ASSIGNED		transcript	taxon:13686	20060515	Uniprot
Uniprot	SI.CL.17.cl.1755.Contig1	SI.CL.17.cl.1755.Contig1		GO:0004672	SP:MP2K2_XENLA	IEA		F	NOT_ASSIGNED		transcript	taxon:13686	20060515	Uniprot
Uniprot	SI.CL.17.cl.1755.Contig1	SI.CL.17.cl.1755.Contig1		GO:0016740	SP:MP2K2_XENLA	IEA		F	NOT_ASSIGNED		transcript	taxon:13686	20060515	Uniprot
Uniprot	SiJWB04BCR.scf	SiJWB04BCR.scf		GO:0004252	SP:Q5TNC5_ANOGA	IEA		F	NOT_ASSIGNED		transcript	taxon:13686	20060515	Uniprot
Uniprot	SiJWB04BCR.scf	SiJWB04BCR.scf		GO:0016787	SP:Q5TNC5_ANOGA	IEA		F	NOT_ASSIGNED		transcript	taxon:13686	20060515	Uniprot
Uniprot	SiJWB04BCR.scf	SiJWB04BCR.scf		GO:0008233	SP:Q5TNC5_ANOGA	IEA		F	NOT_ASSIGNED		transcript	taxon:13686	20060515	Uniprot
Uniprot	SiJWB04BCR.scf	SiJWB04BCR.scf		GO:0006508	SP:Q5TNC5_ANOGA	IEA		P	NOT_ASSIGNED		transcript	taxon:13686	20060515	Uniprot
Uniprot	SI.CL.29.cl.2911.Contig1	SI.CL.29.cl.2911.Contig1		GO:0005554	SP:Q8IYZ0_HUMAN	IEA		F	NOT_ASSIGNED		transcript	taxon:13686	20060515	Uniprot
Uniprot	SI.CL.11.cl.1152.Contig1	SI.CL.11.cl.1152.Contig1		GO:0030125	SP:Q5ZMP6_CHICK	IEA		C	NOT_ASSIGNED		transcript	taxon:13686	20060515	Uniprot
Uniprot	SI.CL.11.cl.1152.Contig1	SI.CL.11.cl.1152.Contig1		GO:0006886	SP:Q5ZMP6_CHICK	IEA		P	NOT_ASSIGNED		transcript	taxon:13686	20060515	Uniprot
Uniprot	SI.CL.11.cl.1152.Contig1	SI.CL.11.cl.1152.Contig1		GO:0006810	SP:Q5ZMP6_CHICK	IEA		P	NOT_ASSIGNED		transcript	taxon:13686	20060515	Uniprot
Uniprot	SiJWG10BBQ2.scf	SiJWG10BBQ2.scf		GO:0004252	SP:Q2M0M7_DROPS	IEA		F	NOT_ASSIGNED		transcript	taxon:13686	20060515	Uniprot
Uniprot	SiJWG10BBQ2.scf	SiJWG10BBQ2.scf		GO:0006508	SP:Q2M0M7_DROPS	IEA		P	NOT_ASSIGNED		transcript	taxon:13686	20060515	Uniprot
Uniprot	SI.CL.13.cl.1370.Contig1	SI.CL.13.cl.1370.Contig1		GO:0005215	SP:Q5TMY7_ANOGA	IEA		F	NOT_ASSIGNED		transcript	taxon:13686	20060515	Uniprot
Uniprot	SI.CL.13.cl.1370.Contig1	SI.CL.13.cl.1370.Contig1		GO:0005622	SP:Q5TMY7_ANOGA	IEA		C	NOT_ASSIGNED		transcript	taxon:13686	20060515	Uniprot
Uniprot	SI.CL.13.cl.1370.Contig1	SI.CL.13.cl.1370.Contig1		GO:0006810	SP:Q5TMY7_ANOGA	IEA		P	NOT_ASSIGNED		transcript	taxon:13686	20060515	Uniprot
Uniprot	SI.CL.19.cl.1936.Contig1	SI.CL.19.cl.1936.Contig1		GO:0005634	SP:O62616_DROSI	IEA		C	NOT_ASSIGNED		transcript	taxon:13686	20060515	Uniprot
Uniprot	SI.CL.19.cl.1936.Contig1	SI.CL.19.cl.1936.Contig1		GO:0016787	SP:O62616_DROSI	IEA		F	NOT_ASSIGNED		transcript	taxon:13686	20060515	Uniprot
Uniprot	SI.CL.19.cl.1936.Contig1	SI.CL.19.cl.1936.Contig1		GO:0004518	SP:O62616_DROSI	IEA		F	NOT_ASSIGNED		transcript	taxon:13686	20060515	Uniprot
Uniprot	SI.CL.28.cl.2824.Contig1	SI.CL.28.cl.2824.Contig1		GO:0005768	SP:VPS28_HUMAN	IEA		C	NOT_ASSIGNED		transcript	taxon:13686	20060515	Uniprot
Uniprot	SI.CL.28.cl.2824.Contig1	SI.CL.28.cl.2824.Contig1		GO:0015031	SP:VPS28_HUMAN	IEA		P	NOT_ASSIGNED		transcript	taxon:13686	20060515	Uniprot
Uniprot	SI.CL.28.cl.2824.Contig1	SI.CL.28.cl.2824.Contig1		GO:0005515	SP:VPS28_HUMAN	IEA		F	NOT_ASSIGNED		transcript	taxon:13686	20060515	Uniprot
Uniprot	SI.CL.28.cl.2824.Contig1	SI.CL.28.cl.2824.Contig1		GO:0005829	SP:VPS28_HUMAN	IEA		C	NOT_ASSIGNED		transcript	taxon:13686	20060515	Uniprot
Uniprot	SI.CL.33.cl.3336.Contig1	SI.CL.33.cl.3336.Contig1		GO:0005739	SP:RT22_HUMAN	IEA		C	NOT_ASSIGNED		transcript	taxon:13686	20060515	Uniprot
Uniprot	SI.CL.33.cl.3336.Contig1	SI.CL.33.cl.3336.Contig1		GO:0000004	SP:RT22_HUMAN	IEA		P	NOT_ASSIGNED		transcript	taxon:13686	20060515	Uniprot
Uniprot	SI.CL.33.cl.3336.Contig1	SI.CL.33.cl.3336.Contig1		GO:0030529	SP:RT22_HUMAN	IEA		C	NOT_ASSIGNED		transcript	taxon:13686	20060515	Uniprot
Uniprot	SI.CL.33.cl.3336.Contig1	SI.CL.33.cl.3336.Contig1		GO:0005554	SP:RT22_HUMAN	IEA		F	NOT_ASSIGNED		transcript	taxon:13686	20060515	Uniprot
Uniprot	SI.CL.33.cl.3336.Contig1	SI.CL.33.cl.3336.Contig1		GO:0005761	SP:RT22_HUMAN	IEA		C	NOT_ASSIGNED		transcript	taxon:13686	20060515	Uniprot
Uniprot	SiJWA10ADW.scf	SiJWA10ADW.scf		GO:0000166	SP:DDX49_HUMAN	IEA		F	NOT_ASSIGNED		transcript	taxon:13686	20060515	Uniprot
Uniprot	SiJWA10ADW.scf	SiJWA10ADW.scf		GO:0004386	SP:Q6P1S5_XENTR	IEA		F	NOT_ASSIGNED		transcript	taxon:13686	20060515	Uniprot
Uniprot	SiJWA10ADW.scf	SiJWA10ADW.scf		GO:0005524	SP:DDX49_HUMAN	IEA		F	NOT_ASSIGNED		transcript	taxon:13686	20060515	Uniprot
Uniprot	SiJWA10ADW.scf	SiJWA10ADW.scf		GO:0003676	SP:Q6P1S5_XENTR	IEA		F	NOT_ASSIGNED		transcript	taxon:13686	20060515	Uniprot
Uniprot	SiJWA10ADW.scf	SiJWA10ADW.scf		GO:0016787	SP:DDX49_HUMAN	IEA		F	NOT_ASSIGNED		transcript	taxon:13686	20060515	Uniprot
Uniprot	SiJWA10ADW.scf	SiJWA10ADW.scf		GO:0008026	SP:DDX49_HUMAN	IEA		F	NOT_ASSIGNED		transcript	taxon:13686	20060515	Uniprot
Uniprot	SiJWA10ADW.scf	SiJWA10ADW.scf		GO:0003723	SP:DDX49_HUMAN	IEA		F	NOT_ASSIGNED		transcript	taxon:13686	20060515	Uniprot
Uniprot	SiJWH04BCB2.scf	SiJWH04BCB2.scf		GO:0005634	SP:HSF1_CHICK	IEA		C	NOT_ASSIGNED		transcript	taxon:13686	20060515	Uniprot
Uniprot	SiJWH04BCB2.scf	SiJWH04BCB2.scf		GO:0006986	SP:HSF1_CHICK	IEA		P	NOT_ASSIGNED		transcript	taxon:13686	20060515	Uniprot
Uniprot	SiJWH04BCB2.scf	SiJWH04BCB2.scf		GO:0043565	SP:HSF1_CHICK	IEA		F	NOT_ASSIGNED		transcript	taxon:13686	20060515	Uniprot
Uniprot	SiJWH04BCB2.scf	SiJWH04BCB2.scf		GO:0006457	SP:HSF1_CHICK	IEA		P	NOT_ASSIGNED		transcript	taxon:13686	20060515	Uniprot
Uniprot	SiJWH04BCB2.scf	SiJWH04BCB2.scf		GO:0006350	SP:HSF1_CHICK	IEA		P	NOT_ASSIGNED		transcript	taxon:13686	20060515	Uniprot
Uniprot	SiJWH04BCB2.scf	SiJWH04BCB2.scf		GO:0003677	SP:HSF_XENLA	IEA		F	NOT_ASSIGNED		transcript	taxon:13686	20060515	Uniprot
Uniprot	SiJWH04BCB2.scf	SiJWH04BCB2.scf		GO:0003700	SP:HSF1_CHICK	IEA		F	NOT_ASSIGNED		transcript	taxon:13686	20060515	Uniprot
Uniprot	SiJWH04BCB2.scf	SiJWH04BCB2.scf		GO:0006355	SP:HSF1_CHICK	IEA		P	NOT_ASSIGNED		transcript	taxon:13686	20060515	Uniprot
Uniprot	SiJWD11ABG.scf	SiJWD11ABG.scf		GO:0045449	SP:O13150_FUGRU	IEA		P	NOT_ASSIGNED		transcript	taxon:13686	20060515	Uniprot
Uniprot	SiJWD11ABG.scf	SiJWD11ABG.scf		GO:0005634	SP:O13150_FUGRU	IEA		C	NOT_ASSIGNED		transcript	taxon:13686	20060515	Uniprot
Uniprot	SiJWD11ABG.scf	SiJWD11ABG.scf		GO:0030154	SP:Q6VYN0_DROLE	IEA		P	NOT_ASSIGNED		transcript	taxon:13686	20060515	Uniprot
Uniprot	SiJWD11ABG.scf	SiJWD11ABG.scf		GO:0007275	SP:Q6VYN0_DROLE	IEA		P	NOT_ASSIGNED		transcript	taxon:13686	20060515	Uniprot
Uniprot	SiJWD11ABG.scf	SiJWD11ABG.scf		GO:0030528	SP:O13150_FUGRU	IEA		F	NOT_ASSIGNED		transcript	taxon:13686	20060515	Uniprot
Uniprot	SiJWD11BDL2.scf	SiJWD11BDL2.scf		GO:0016020	SP:Q75QW6_APIME	IEA		C	NOT_ASSIGNED		transcript	taxon:13686	20060515	Uniprot
Uniprot	SiJWD11BDL2.scf	SiJWD11BDL2.scf		GO:0008067	SP:Q75QW6_APIME	IEA		F	NOT_ASSIGNED		transcript	taxon:13686	20060515	Uniprot
Uniprot	SiJWD11BDL2.scf	SiJWD11BDL2.scf		GO:0004930	SP:Q75QW6_APIME	IEA		F	NOT_ASSIGNED		transcript	taxon:13686	20060515	Uniprot
Uniprot	SiJWD11BDL2.scf	SiJWD11BDL2.scf		GO:0004872	SP:Q75QW6_APIME	IEA		F	NOT_ASSIGNED		transcript	taxon:13686	20060515	Uniprot
Uniprot	SI.CL.8.cl.804.Contig1	SI.CL.8.cl.804.Contig1		GO:0005578	SP:Q7Q1A7_ANOGA	IEA		C	NOT_ASSIGNED		transcript	taxon:13686	20060515	Uniprot
Uniprot	SI.CL.8.cl.804.Contig1	SI.CL.8.cl.804.Contig1		GO:0042302	SP:CU17_BOMMO	IEA		F	NOT_ASSIGNED		transcript	taxon:13686	20060515	Uniprot
Uniprot	SI.CL.8.cl.804.Contig1	SI.CL.8.cl.804.Contig1		GO:0005201	SP:Q7Q1A7_ANOGA	IEA		F	NOT_ASSIGNED		transcript	taxon:13686	20060515	Uniprot
Uniprot	SI.CL.8.cl.804.Contig1	SI.CL.8.cl.804.Contig1		GO:0005199	SP:Q2LZE7_DROPS	IEA		F	NOT_ASSIGNED		transcript	taxon:13686	20060515	Uniprot
Uniprot	SI.CL.8.cl.804.Contig1	SI.CL.8.cl.804.Contig1		GO:0005198	SP:CU17_BOMMO	IEA		F	NOT_ASSIGNED		transcript	taxon:13686	20060515	Uniprot
Uniprot	SiJWD11BAL.scf	SiJWD11BAL.scf		GO:0009117	SP:Q7L2N1_HUMAN	IEA		P	NOT_ASSIGNED		transcript	taxon:13686	20060515	Uniprot
Uniprot	SiJWD11BAL.scf	SiJWD11BAL.scf		GO:0016787	SP:Q7L2N1_HUMAN	IEA		F	NOT_ASSIGNED		transcript	taxon:13686	20060515	Uniprot
Uniprot	SI.CL.19.cl.1903.Contig1	SI.CL.19.cl.1903.Contig1		GO:0006412	SP:Q4GXF5_9COLE	IEA		P	NOT_ASSIGNED		transcript	taxon:13686	20060515	Uniprot
Uniprot	SI.CL.19.cl.1903.Contig1	SI.CL.19.cl.1903.Contig1		GO:0005840	SP:Q4GXF5_9COLE	IEA		C	NOT_ASSIGNED		transcript	taxon:13686	20060515	Uniprot
Uniprot	SI.CL.19.cl.1903.Contig1	SI.CL.19.cl.1903.Contig1		GO:0003735	SP:Q4GXF5_9COLE	IEA		F	NOT_ASSIGNED		transcript	taxon:13686	20060515	Uniprot
Uniprot	SI.CL.19.cl.1903.Contig1	SI.CL.19.cl.1903.Contig1		GO:0005622	SP:Q4GXF5_9COLE	IEA		C	NOT_ASSIGNED		transcript	taxon:13686	20060515	Uniprot
Uniprot	SiJWA04ACY.scf	SiJWA04ACY.scf		GO:0004750	SP:Q2QD12_HUMAN	IEA		F	NOT_ASSIGNED		transcript	taxon:13686	20060515	Uniprot
Uniprot	SiJWA04ACY.scf	SiJWA04ACY.scf		GO:0016853	SP:RPE_HUMAN	IEA		F	NOT_ASSIGNED		transcript	taxon:13686	20060515	Uniprot
Uniprot	SiJWA04ACY.scf	SiJWA04ACY.scf		GO:0005515	SP:RPE_HUMAN	IEA		F	NOT_ASSIGNED		transcript	taxon:13686	20060515	Uniprot
Uniprot	SiJWA04ACY.scf	SiJWA04ACY.scf		GO:0005975	SP:Q2QD12_HUMAN	IEA		P	NOT_ASSIGNED		transcript	taxon:13686	20060515	Uniprot
Uniprot	SI.CL.6.cl.678.SiJWF06ACE.SP6.scf	SI.CL.6.cl.678.SiJWF06ACE.SP6.scf		GO:0005634	SP:CRSP6_HUMAN	IEA		C	NOT_ASSIGNED		transcript	taxon:13686	20060515	Uniprot
Uniprot	SI.CL.6.cl.678.SiJWF06ACE.SP6.scf	SI.CL.6.cl.678.SiJWF06ACE.SP6.scf		GO:0045944	SP:CRSP6_HUMAN	IEA		P	NOT_ASSIGNED		transcript	taxon:13686	20060515	Uniprot
Uniprot	SI.CL.6.cl.678.SiJWF06ACE.SP6.scf	SI.CL.6.cl.678.SiJWF06ACE.SP6.scf		GO:0046966	SP:CRSP6_HUMAN	IEA		F	NOT_ASSIGNED		transcript	taxon:13686	20060515	Uniprot
Uniprot	SI.CL.6.cl.678.SiJWF06ACE.SP6.scf	SI.CL.6.cl.678.SiJWF06ACE.SP6.scf		GO:0006367	SP:CRSP6_HUMAN	IEA		P	NOT_ASSIGNED		transcript	taxon:13686	20060515	Uniprot
Uniprot	SI.CL.6.cl.678.SiJWF06ACE.SP6.scf	SI.CL.6.cl.678.SiJWF06ACE.SP6.scf		GO:0030374	SP:CRSP6_HUMAN	IEA		F	NOT_ASSIGNED		transcript	taxon:13686	20060515	Uniprot
Uniprot	SI.CL.6.cl.678.SiJWF06ACE.SP6.scf	SI.CL.6.cl.678.SiJWF06ACE.SP6.scf		GO:0030521	SP:CRSP6_HUMAN	IEA		P	NOT_ASSIGNED		transcript	taxon:13686	20060515	Uniprot
Uniprot	SI.CL.6.cl.678.SiJWF06ACE.SP6.scf	SI.CL.6.cl.678.SiJWF06ACE.SP6.scf		GO:0006350	SP:CRSP6_HUMAN	IEA		P	NOT_ASSIGNED		transcript	taxon:13686	20060515	Uniprot
Uniprot	SI.CL.6.cl.678.SiJWF06ACE.SP6.scf	SI.CL.6.cl.678.SiJWF06ACE.SP6.scf		GO:0005667	SP:CRSP6_HUMAN	IEA		C	NOT_ASSIGNED		transcript	taxon:13686	20060515	Uniprot
Uniprot	SI.CL.6.cl.678.SiJWF06ACE.SP6.scf	SI.CL.6.cl.678.SiJWF06ACE.SP6.scf		GO:0005515	SP:CRSP6_HUMAN	IEA		F	NOT_ASSIGNED		transcript	taxon:13686	20060515	Uniprot
Uniprot	SI.CL.6.cl.678.SiJWF06ACE.SP6.scf	SI.CL.6.cl.678.SiJWF06ACE.SP6.scf		GO:0000119	SP:CRSP6_HUMAN	IEA		C	NOT_ASSIGNED		transcript	taxon:13686	20060515	Uniprot
Uniprot	SI.CL.6.cl.678.SiJWF06ACE.SP6.scf	SI.CL.6.cl.678.SiJWF06ACE.SP6.scf		GO:0003824	SP:Q5ZID1_CHICK	IEA		F	NOT_ASSIGNED		transcript	taxon:13686	20060515	Uniprot
Uniprot	SI.CL.6.cl.678.SiJWF06ACE.SP6.scf	SI.CL.6.cl.678.SiJWF06ACE.SP6.scf		GO:0004872	SP:CRSP6_HUMAN	IEA		F	NOT_ASSIGNED		transcript	taxon:13686	20060515	Uniprot
Uniprot	SI.CL.6.cl.678.SiJWF06ACE.SP6.scf	SI.CL.6.cl.678.SiJWF06ACE.SP6.scf		GO:0016455	SP:CRSP6_HUMAN	IEA		F	NOT_ASSIGNED		transcript	taxon:13686	20060515	Uniprot
Uniprot	SI.CL.6.cl.678.SiJWF06ACE.SP6.scf	SI.CL.6.cl.678.SiJWF06ACE.SP6.scf		GO:0042809	SP:CRSP6_HUMAN	IEA		F	NOT_ASSIGNED		transcript	taxon:13686	20060515	Uniprot
Uniprot	SI.CL.18.cl.1830.Contig1	SI.CL.18.cl.1830.Contig1		GO:0005783	SP:HM13_HUMAN	IEA		C	NOT_ASSIGNED		transcript	taxon:13686	20060515	Uniprot
Uniprot	SI.CL.18.cl.1830.Contig1	SI.CL.18.cl.1830.Contig1		GO:0016020	SP:HM13_HUMAN	IEA		C	NOT_ASSIGNED		transcript	taxon:13686	20060515	Uniprot
Uniprot	SI.CL.18.cl.1830.Contig1	SI.CL.18.cl.1830.Contig1		GO:0008233	SP:HM13_HUMAN	IEA		F	NOT_ASSIGNED		transcript	taxon:13686	20060515	Uniprot
Uniprot	SI.CL.18.cl.1830.Contig1	SI.CL.18.cl.1830.Contig1		GO:0005515	SP:HM13_HUMAN	IEA		F	NOT_ASSIGNED		transcript	taxon:13686	20060515	Uniprot
Uniprot	SI.CL.18.cl.1830.Contig1	SI.CL.18.cl.1830.Contig1		GO:0016021	SP:HM13_HUMAN	IEA		C	NOT_ASSIGNED		transcript	taxon:13686	20060515	Uniprot
Uniprot	SI.CL.18.cl.1830.Contig1	SI.CL.18.cl.1830.Contig1		GO:0008717	SP:HM13_HUMAN	IEA		F	NOT_ASSIGNED		transcript	taxon:13686	20060515	Uniprot
Uniprot	SI.CL.1.cl.141.Contig1	SI.CL.1.cl.141.Contig1		GO:0006412	SP:Q4GXL0_9COLE	IEA		P	NOT_ASSIGNED		transcript	taxon:13686	20060515	Uniprot
Uniprot	SI.CL.1.cl.141.Contig1	SI.CL.1.cl.141.Contig1		GO:0005840	SP:Q4GXL0_9COLE	IEA		C	NOT_ASSIGNED		transcript	taxon:13686	20060515	Uniprot
Uniprot	SI.CL.1.cl.141.Contig1	SI.CL.1.cl.141.Contig1		GO:0030529	SP:Q4GXL0_9COLE	IEA		C	NOT_ASSIGNED		transcript	taxon:13686	20060515	Uniprot
Uniprot	SI.CL.1.cl.141.Contig1	SI.CL.1.cl.141.Contig1		GO:0003735	SP:Q4GXL0_9COLE	IEA		F	NOT_ASSIGNED		transcript	taxon:13686	20060515	Uniprot
Uniprot	SI.CL.1.cl.141.Contig1	SI.CL.1.cl.141.Contig1		GO:0005622	SP:Q4GXL0_9COLE	IEA		C	NOT_ASSIGNED		transcript	taxon:13686	20060515	Uniprot
Uniprot	SiJWF04BAG.scf	SiJWF04BAG.scf		GO:0007586	SP:TRY6_ANOGA	IEA		P	NOT_ASSIGNED		transcript	taxon:13686	20060515	Uniprot
Uniprot	SiJWF04BAG.scf	SiJWF04BAG.scf		GO:0004252	SP:O42272_XENLA	IEA		F	NOT_ASSIGNED		transcript	taxon:13686	20060515	Uniprot
Uniprot	SiJWF04BAG.scf	SiJWF04BAG.scf		GO:0016787	SP:O42272_XENLA	IEA		F	NOT_ASSIGNED		transcript	taxon:13686	20060515	Uniprot
Uniprot	SiJWF04BAG.scf	SiJWF04BAG.scf		GO:0004295	SP:TRY6_ANOGA	IEA		F	NOT_ASSIGNED		transcript	taxon:13686	20060515	Uniprot
Uniprot	SiJWF04BAG.scf	SiJWF04BAG.scf		GO:0008233	SP:O42272_XENLA	IEA		F	NOT_ASSIGNED		transcript	taxon:13686	20060515	Uniprot
Uniprot	SiJWF04BAG.scf	SiJWF04BAG.scf		GO:0016021	SP:Q5PPM3_XENTR	IEA		C	NOT_ASSIGNED		transcript	taxon:13686	20060515	Uniprot
Uniprot	SiJWF04BAG.scf	SiJWF04BAG.scf		GO:0006508	SP:O42272_XENLA	IEA		P	NOT_ASSIGNED		transcript	taxon:13686	20060515	Uniprot
Uniprot	SiJWE02AAL.scf	SiJWE02AAL.scf		GO:0005096	SP:RB3GP_XENLA	IEA		F	NOT_ASSIGNED		transcript	taxon:13686	20060515	Uniprot
Uniprot	SiJWE02AAL.scf	SiJWE02AAL.scf		GO:0043087	SP:RB3GP_HUMAN	IEA		P	NOT_ASSIGNED		transcript	taxon:13686	20060515	Uniprot
Uniprot	SiJWE02AAL.scf	SiJWE02AAL.scf		GO:0005097	SP:RB3GP_HUMAN	IEA		F	NOT_ASSIGNED		transcript	taxon:13686	20060515	Uniprot
Uniprot	SiJWE02AAL.scf	SiJWE02AAL.scf		GO:0005625	SP:RB3GP_HUMAN	IEA		C	NOT_ASSIGNED		transcript	taxon:13686	20060515	Uniprot
Uniprot	SiJWE02AAL.scf	SiJWE02AAL.scf		GO:0017137	SP:RB3GP_HUMAN	IEA		F	NOT_ASSIGNED		transcript	taxon:13686	20060515	Uniprot
Uniprot	SiJWC04ABK.scf	SiJWC04ABK.scf		GO:0005634	SP:RPA2_HUMAN	IEA		C	NOT_ASSIGNED		transcript	taxon:13686	20060515	Uniprot
Uniprot	SiJWC04ABK.scf	SiJWC04ABK.scf		GO:0016779	SP:Q6PCJ2_XENLA	IEA		F	NOT_ASSIGNED		transcript	taxon:13686	20060515	Uniprot
Uniprot	SiJWC04ABK.scf	SiJWC04ABK.scf		GO:0046872	SP:RPA2_HUMAN	IEA		F	NOT_ASSIGNED		transcript	taxon:13686	20060515	Uniprot
Uniprot	SiJWC04ABK.scf	SiJWC04ABK.scf		GO:0003677	SP:Q9H6S8_HUMAN	IEA		F	NOT_ASSIGNED		transcript	taxon:13686	20060515	Uniprot
Uniprot	SiJWC04ABK.scf	SiJWC04ABK.scf		GO:0006350	SP:Q9H6S8_HUMAN	IEA		P	NOT_ASSIGNED		transcript	taxon:13686	20060515	Uniprot
Uniprot	SiJWC04ABK.scf	SiJWC04ABK.scf		GO:0008270	SP:RPA2_HUMAN	IEA		F	NOT_ASSIGNED		transcript	taxon:13686	20060515	Uniprot
Uniprot	SiJWC04ABK.scf	SiJWC04ABK.scf		GO:0003899	SP:Q9H6S8_HUMAN	IEA		F	NOT_ASSIGNED		transcript	taxon:13686	20060515	Uniprot
Uniprot	SiJWC04ABK.scf	SiJWC04ABK.scf		GO:0016740	SP:Q9H6S8_HUMAN	IEA		F	NOT_ASSIGNED		transcript	taxon:13686	20060515	Uniprot
Uniprot	SI.CL.10.cl.1051.Contig1	SI.CL.10.cl.1051.Contig1		GO:0009165	SP:Q5DGT4_SCHJA	IEA		P	NOT_ASSIGNED		transcript	taxon:13686	20060515	Uniprot
Uniprot	SI.CL.10.cl.1051.Contig1	SI.CL.10.cl.1051.Contig1		GO:0006231	SP:Q5DGT4_SCHJA	IEA		P	NOT_ASSIGNED		transcript	taxon:13686	20060515	Uniprot
Uniprot	SI.CL.10.cl.1051.Contig1	SI.CL.10.cl.1051.Contig1		GO:0004799	SP:Q5DGT4_SCHJA	IEA		F	NOT_ASSIGNED		transcript	taxon:13686	20060515	Uniprot
Uniprot	SI.CL.10.cl.1051.Contig1	SI.CL.10.cl.1051.Contig1		GO:0008168	SP:Q5DGT4_SCHJA	IEA		F	NOT_ASSIGNED		transcript	taxon:13686	20060515	Uniprot
Uniprot	SI.CL.10.cl.1051.Contig1	SI.CL.10.cl.1051.Contig1		GO:0016740	SP:Q5DGT4_SCHJA	IEA		F	NOT_ASSIGNED		transcript	taxon:13686	20060515	Uniprot
Uniprot	SI.CL.2.cl.230.SiJWB01ACH.scf	SI.CL.2.cl.230.SiJWB01ACH.scf		GO:0006207	SP:ER_DROVI	IEA		P	NOT_ASSIGNED		transcript	taxon:13686	20060515	Uniprot
Uniprot	SI.CL.2.cl.230.SiJWB01ACH.scf	SI.CL.2.cl.230.SiJWB01ACH.scf		GO:0006139	SP:ERH_HUMAN	IEA		P	NOT_ASSIGNED		transcript	taxon:13686	20060515	Uniprot
Uniprot	SI.CL.2.cl.230.SiJWB01ACH.scf	SI.CL.2.cl.230.SiJWB01ACH.scf		GO:0000074	SP:ERH_HUMAN	IEA		P	NOT_ASSIGNED		transcript	taxon:13686	20060515	Uniprot
Uniprot	SI.CL.2.cl.230.SiJWB01ACH.scf	SI.CL.2.cl.230.SiJWB01ACH.scf		GO:0006221	SP:ER_DROVI	IEA		P	NOT_ASSIGNED		transcript	taxon:13686	20060515	Uniprot
Uniprot	SI.CL.2.cl.230.SiJWB01ACH.scf	SI.CL.2.cl.230.SiJWB01ACH.scf		GO:0006213	SP:ERH_HUMAN	IEA		P	NOT_ASSIGNED		transcript	taxon:13686	20060515	Uniprot
Uniprot	SI.CL.2.cl.230.SiJWB01ACH.scf	SI.CL.2.cl.230.SiJWB01ACH.scf		GO:0007049	SP:ER_DROVI	IEA		P	NOT_ASSIGNED		transcript	taxon:13686	20060515	Uniprot
Uniprot	SI.CL.2.cl.230.SiJWB01ACH.scf	SI.CL.2.cl.230.SiJWB01ACH.scf		GO:0005554	SP:Q5ZI09_CHICK	IEA		F	NOT_ASSIGNED		transcript	taxon:13686	20060515	Uniprot
Uniprot	SI.CL.2.cl.230.SiJWB01ACH.scf	SI.CL.2.cl.230.SiJWB01ACH.scf		GO:0008372	SP:ER_DROVI	IEA		C	NOT_ASSIGNED		transcript	taxon:13686	20060515	Uniprot
Uniprot	SI.CL.11.cl.1113.Contig2	SI.CL.11.cl.1113.Contig2		GO:0016564	SP:Q7PXB6_ANOGA	IEA		F	NOT_ASSIGNED		transcript	taxon:13686	20060515	Uniprot
Uniprot	SI.CL.11.cl.1113.Contig2	SI.CL.11.cl.1113.Contig2		GO:0016491	SP:BLVRB_HUMAN	IEA		F	NOT_ASSIGNED		transcript	taxon:13686	20060515	Uniprot
Uniprot	SI.CL.11.cl.1113.Contig2	SI.CL.11.cl.1113.Contig2		GO:0009225	SP:BLVRB_HUMAN	IEA		P	NOT_ASSIGNED		transcript	taxon:13686	20060515	Uniprot
Uniprot	SI.CL.11.cl.1113.Contig2	SI.CL.11.cl.1113.Contig2		GO:0042602	SP:BLVRB_HUMAN	IEA		F	NOT_ASSIGNED		transcript	taxon:13686	20060515	Uniprot
Uniprot	SI.CL.11.cl.1113.Contig2	SI.CL.11.cl.1113.Contig2		GO:0004074	SP:BLVRB_HUMAN	IEA		F	NOT_ASSIGNED		transcript	taxon:13686	20060515	Uniprot
Uniprot	SI.CL.11.cl.1113.Contig2	SI.CL.11.cl.1113.Contig2		GO:0006808	SP:Q7PXB6_ANOGA	IEA		P	NOT_ASSIGNED		transcript	taxon:13686	20060515	Uniprot
Uniprot	SI.CL.11.cl.1113.Contig2	SI.CL.11.cl.1113.Contig2		GO:0051287	SP:BLVRB_HUMAN	IEA		F	NOT_ASSIGNED		transcript	taxon:13686	20060515	Uniprot
Uniprot	SI.CL.11.cl.1113.Contig2	SI.CL.11.cl.1113.Contig2		GO:0003824	SP:Q4RFW2_TETNG	IEA		F	NOT_ASSIGNED		transcript	taxon:13686	20060515	Uniprot
Uniprot	SI.CL.6.cl.646.Contig1	SI.CL.6.cl.646.Contig1		GO:0005634	SP:Q9NP66_HUMAN	IEA		C	NOT_ASSIGNED		transcript	taxon:13686	20060515	Uniprot
Uniprot	SI.CL.6.cl.646.Contig1	SI.CL.6.cl.646.Contig1		GO:0003677	SP:Q5ZKF4_CHICK	IEA		F	NOT_ASSIGNED		transcript	taxon:13686	20060515	Uniprot
Uniprot	SI.CL.6.cl.646.Contig1	SI.CL.6.cl.646.Contig1		GO:0005515	SP:Q9NP66_HUMAN	IEA		F	NOT_ASSIGNED		transcript	taxon:13686	20060515	Uniprot
Uniprot	SI.CL.6.cl.646.Contig1	SI.CL.6.cl.646.Contig1		GO:0003700	SP:Q9NP66_HUMAN	IEA		F	NOT_ASSIGNED		transcript	taxon:13686	20060515	Uniprot
Uniprot	SI.CL.6.cl.646.Contig1	SI.CL.6.cl.646.Contig1		GO:0006355	SP:Q9NP66_HUMAN	IEA		P	NOT_ASSIGNED		transcript	taxon:13686	20060515	Uniprot
Uniprot	SI.CL.6.cl.646.Contig1	SI.CL.6.cl.646.Contig1		GO:0006325	SP:Q9NP66_HUMAN	IEA		P	NOT_ASSIGNED		transcript	taxon:13686	20060515	Uniprot
Uniprot	SI.CL.24.cl.2450.Contig1	SI.CL.24.cl.2450.Contig1		GO:0005524	SP:Q9ULG1_HUMAN	IEA		F	NOT_ASSIGNED		transcript	taxon:13686	20060515	Uniprot
Uniprot	SI.CL.24.cl.2450.Contig1	SI.CL.24.cl.2450.Contig1		GO:0004386	SP:Q9ULG1_HUMAN	IEA		F	NOT_ASSIGNED		transcript	taxon:13686	20060515	Uniprot
Uniprot	SI.CL.24.cl.2450.Contig1	SI.CL.24.cl.2450.Contig1		GO:0003677	SP:Q9ULG1_HUMAN	IEA		F	NOT_ASSIGNED		transcript	taxon:13686	20060515	Uniprot
Uniprot	SI.CL.24.cl.2450.Contig1	SI.CL.24.cl.2450.Contig1		GO:0003676	SP:Q4SC15_TETNG	IEA		F	NOT_ASSIGNED		transcript	taxon:13686	20060515	Uniprot
Uniprot	SI.CL.15.cl.1517.Contig1	SI.CL.15.cl.1517.Contig1		GO:0005550	SP:Q8WRV9_MANSE	IEA		F	NOT_ASSIGNED		transcript	taxon:13686	20060515	Uniprot
Uniprot	SI.CL.15.cl.1517.Contig1	SI.CL.15.cl.1517.Contig1		GO:0005549	SP:Q2Q1Y9_9HYME	IEA		F	NOT_ASSIGNED		transcript	taxon:13686	20060515	Uniprot
Uniprot	SI.CL.15.cl.1517.Contig1	SI.CL.15.cl.1517.Contig1		GO:0006810	SP:Q2Q1Y9_9HYME	IEA		P	NOT_ASSIGNED		transcript	taxon:13686	20060515	Uniprot
Uniprot	SI.CL.31.cl.3193.Contig1	SI.CL.31.cl.3193.Contig1		GO:0017061	SP:MTAP_HUMAN	IEA		F	NOT_ASSIGNED		transcript	taxon:13686	20060515	Uniprot
Uniprot	SI.CL.31.cl.3193.Contig1	SI.CL.31.cl.3193.Contig1		GO:0004645	SP:MTAP_HUMAN	IEA		F	NOT_ASSIGNED		transcript	taxon:13686	20060515	Uniprot
Uniprot	SI.CL.31.cl.3193.Contig1	SI.CL.31.cl.3193.Contig1		GO:0016763	SP:Q3MHF7_BOVIN	IEA		F	NOT_ASSIGNED		transcript	taxon:13686	20060515	Uniprot
Uniprot	SI.CL.31.cl.3193.Contig1	SI.CL.31.cl.3193.Contig1		GO:0006139	SP:MTAP_HUMAN	IEA		P	NOT_ASSIGNED		transcript	taxon:13686	20060515	Uniprot
Uniprot	SI.CL.31.cl.3193.Contig1	SI.CL.31.cl.3193.Contig1		GO:0016757	SP:Q5HZU2_XENTR	IEA		F	NOT_ASSIGNED		transcript	taxon:13686	20060515	Uniprot
Uniprot	SI.CL.31.cl.3193.Contig1	SI.CL.31.cl.3193.Contig1		GO:0016740	SP:Q5HZU2_XENTR	IEA		F	NOT_ASSIGNED		transcript	taxon:13686	20060515	Uniprot
Uniprot	SI.CL.13.cl.1352.SiJWE11ABR.scf	SI.CL.13.cl.1352.SiJWE11ABR.scf		GO:0005739	SP:COX6C_BOVIN	IEA		C	NOT_ASSIGNED		transcript	taxon:13686	20060515	Uniprot
Uniprot	SI.CL.13.cl.1352.SiJWE11ABR.scf	SI.CL.13.cl.1352.SiJWE11ABR.scf		GO:0016020	SP:COX6C_BOVIN	IEA		C	NOT_ASSIGNED		transcript	taxon:13686	20060515	Uniprot
Uniprot	SI.CL.13.cl.1352.SiJWE11ABR.scf	SI.CL.13.cl.1352.SiJWE11ABR.scf		GO:0016491	SP:COX6C_BOVIN	IEA		F	NOT_ASSIGNED		transcript	taxon:13686	20060515	Uniprot
Uniprot	SI.CL.13.cl.1352.SiJWE11ABR.scf	SI.CL.13.cl.1352.SiJWE11ABR.scf		GO:0004129	SP:COX6C_BOVIN	IEA		F	NOT_ASSIGNED		transcript	taxon:13686	20060515	Uniprot
Uniprot	SI.CL.13.cl.1352.SiJWE11ABR.scf	SI.CL.13.cl.1352.SiJWE11ABR.scf		GO:0016021	SP:COX6C_BOVIN	IEA		C	NOT_ASSIGNED		transcript	taxon:13686	20060515	Uniprot
Uniprot	SI.CL.13.cl.1352.SiJWE11ABR.scf	SI.CL.13.cl.1352.SiJWE11ABR.scf		GO:0006118	SP:COX6C_BOVIN	IEA		P	NOT_ASSIGNED		transcript	taxon:13686	20060515	Uniprot
Uniprot	SiJWG09BBS.scf	SiJWG09BBS.scf		GO:0005634	SP:O96918_ANOGA	IEA		C	NOT_ASSIGNED		transcript	taxon:13686	20060515	Uniprot
Uniprot	SiJWG09BBS.scf	SiJWG09BBS.scf		GO:0003676	SP:O96918_ANOGA	IEA		F	NOT_ASSIGNED		transcript	taxon:13686	20060515	Uniprot
Uniprot	SiJWG09BBS.scf	SiJWG09BBS.scf		GO:0004803	SP:O96918_ANOGA	IEA		F	NOT_ASSIGNED		transcript	taxon:13686	20060515	Uniprot
Uniprot	SiJWG09BBS.scf	SiJWG09BBS.scf		GO:0006310	SP:TCB1_CAEBR	IEA		P	NOT_ASSIGNED		transcript	taxon:13686	20060515	Uniprot
Uniprot	SiJWG09BBS.scf	SiJWG09BBS.scf		GO:0045449	SP:Q4ECI8_9RICK	IEA		P	NOT_ASSIGNED		transcript	taxon:13686	20060515	Uniprot
Uniprot	SiJWG09BBS.scf	SiJWG09BBS.scf		GO:0006350	SP:Q6X1Z4_RANPI	IEA		P	NOT_ASSIGNED		transcript	taxon:13686	20060515	Uniprot
Uniprot	SiJWG09BBS.scf	SiJWG09BBS.scf		GO:0003677	SP:O96918_ANOGA	IEA		F	NOT_ASSIGNED		transcript	taxon:13686	20060515	Uniprot
Uniprot	SiJWG09BBS.scf	SiJWG09BBS.scf		GO:0006313	SP:TCB1_CAEBR	IEA		P	NOT_ASSIGNED		transcript	taxon:13686	20060515	Uniprot
Uniprot	SiJWG09BBS.scf	SiJWG09BBS.scf		GO:0006355	SP:Q6X1Z4_RANPI	IEA		P	NOT_ASSIGNED		transcript	taxon:13686	20060515	Uniprot
Uniprot	SiJWG09BBS.scf	SiJWG09BBS.scf		GO:0015074	SP:O96918_ANOGA	IEA		P	NOT_ASSIGNED		transcript	taxon:13686	20060515	Uniprot
Uniprot	SiJWE05CAA.scf	SiJWE05CAA.scf		GO:0005634	SP:Q7Q1D3_ANOGA	IEA		C	NOT_ASSIGNED		transcript	taxon:13686	20060515	Uniprot
Uniprot	SiJWE05CAA.scf	SiJWE05CAA.scf		GO:0003676	SP:Q7Q1D3_ANOGA	IEA		F	NOT_ASSIGNED		transcript	taxon:13686	20060515	Uniprot
Uniprot	SiJWE05CAA.scf	SiJWE05CAA.scf		GO:0008270	SP:Q7Q1D3_ANOGA	IEA		F	NOT_ASSIGNED		transcript	taxon:13686	20060515	Uniprot
Uniprot	SiJWE05CAA.scf	SiJWE05CAA.scf		GO:0005737	SP:U33K_HUMAN	IEA		C	NOT_ASSIGNED		transcript	taxon:13686	20060515	Uniprot
Uniprot	SiJWH07ACP.scf	SiJWH07ACP.scf		GO:0008270	SP:Q7PS34_ANOGA	IEA		F	NOT_ASSIGNED		transcript	taxon:13686	20060515	Uniprot
Uniprot	SI.CL.33.cl.3325.Contig1	SI.CL.33.cl.3325.Contig1		GO:0016020	SP:NFIP2_HUMAN	IEA		C	NOT_ASSIGNED		transcript	taxon:13686	20060515	Uniprot
Uniprot	SI.CL.33.cl.3325.Contig1	SI.CL.33.cl.3325.Contig1		GO:0005795	SP:NFIP2_HUMAN	IEA		C	NOT_ASSIGNED		transcript	taxon:13686	20060515	Uniprot
Uniprot	SI.CL.33.cl.3325.Contig1	SI.CL.33.cl.3325.Contig1		GO:0016021	SP:NFIP2_HUMAN	IEA		C	NOT_ASSIGNED		transcript	taxon:13686	20060515	Uniprot
Uniprot	SI.CL.17.cl.1745.Contig1	SI.CL.17.cl.1745.Contig1		GO:0019843	SP:RS18_BRABE	IEA		F	NOT_ASSIGNED		transcript	taxon:13686	20060515	Uniprot
Uniprot	SI.CL.17.cl.1745.Contig1	SI.CL.17.cl.1745.Contig1		GO:0006412	SP:Q4GXQ1_9CUCU	IEA		P	NOT_ASSIGNED		transcript	taxon:13686	20060515	Uniprot
Uniprot	SI.CL.17.cl.1745.Contig1	SI.CL.17.cl.1745.Contig1		GO:0005840	SP:Q4GXQ1_9CUCU	IEA		C	NOT_ASSIGNED		transcript	taxon:13686	20060515	Uniprot
Uniprot	SI.CL.17.cl.1745.Contig1	SI.CL.17.cl.1745.Contig1		GO:0030529	SP:Q4GXQ1_9CUCU	IEA		C	NOT_ASSIGNED		transcript	taxon:13686	20060515	Uniprot
Uniprot	SI.CL.17.cl.1745.Contig1	SI.CL.17.cl.1745.Contig1		GO:0003735	SP:Q4GXQ1_9CUCU	IEA		F	NOT_ASSIGNED		transcript	taxon:13686	20060515	Uniprot
Uniprot	SI.CL.17.cl.1745.Contig1	SI.CL.17.cl.1745.Contig1		GO:0005622	SP:Q4GXQ1_9CUCU	IEA		C	NOT_ASSIGNED		transcript	taxon:13686	20060515	Uniprot
Uniprot	SI.CL.17.cl.1745.Contig1	SI.CL.17.cl.1745.Contig1		GO:0003723	SP:Q4GXQ1_9CUCU	IEA		F	NOT_ASSIGNED		transcript	taxon:13686	20060515	Uniprot
Uniprot	SI.CL.37.cl.3711.Contig1	SI.CL.37.cl.3711.Contig1		GO:0003677	SP:THAP4_HUMAN	IEA		F	NOT_ASSIGNED		transcript	taxon:13686	20060515	Uniprot
Uniprot	SI.CL.37.cl.3711.Contig1	SI.CL.37.cl.3711.Contig1		GO:0046872	SP:THAP4_HUMAN	IEA		F	NOT_ASSIGNED		transcript	taxon:13686	20060515	Uniprot
Uniprot	SI.CL.37.cl.3711.Contig1	SI.CL.37.cl.3711.Contig1		GO:0008270	SP:THAP4_HUMAN	IEA		F	NOT_ASSIGNED		transcript	taxon:13686	20060515	Uniprot
Uniprot	SI.CL.34.cl.3497.Contig1	SI.CL.34.cl.3497.Contig1		GO:0008152	SP:Q5TST3_ANOGA	IEA		P	NOT_ASSIGNED		transcript	taxon:13686	20060515	Uniprot
Uniprot	SI.CL.34.cl.3497.Contig1	SI.CL.34.cl.3497.Contig1		GO:0006081	SP:Q5TST3_ANOGA	IEA		P	NOT_ASSIGNED		transcript	taxon:13686	20060515	Uniprot
Uniprot	SI.CL.34.cl.3497.Contig1	SI.CL.34.cl.3497.Contig1		GO:0016491	SP:Q5TST3_ANOGA	IEA		F	NOT_ASSIGNED		transcript	taxon:13686	20060515	Uniprot
Uniprot	SI.CL.34.cl.3497.Contig1	SI.CL.34.cl.3497.Contig1		GO:0004030	SP:Q5TST3_ANOGA	IEA		F	NOT_ASSIGNED		transcript	taxon:13686	20060515	Uniprot
Uniprot	SiJWC09CAK2.scf	SiJWC09CAK2.scf		GO:0005874	SP:TBCC_HUMAN	IEA		C	NOT_ASSIGNED		transcript	taxon:13686	20060515	Uniprot
Uniprot	SiJWC09CAK2.scf	SiJWC09CAK2.scf		GO:0005856	SP:TBCC_HUMAN	IEA		C	NOT_ASSIGNED		transcript	taxon:13686	20060515	Uniprot
Uniprot	SiJWC09CAK2.scf	SiJWC09CAK2.scf		GO:0007023	SP:TBCC_HUMAN	IEA		P	NOT_ASSIGNED		transcript	taxon:13686	20060515	Uniprot
Uniprot	SiJWC09CAK2.scf	SiJWC09CAK2.scf		GO:0006457	SP:TBCC_HUMAN	IEA		P	NOT_ASSIGNED		transcript	taxon:13686	20060515	Uniprot
Uniprot	SiJWC09CAK2.scf	SiJWC09CAK2.scf		GO:0051087	SP:TBCC_HUMAN	IEA		F	NOT_ASSIGNED		transcript	taxon:13686	20060515	Uniprot
Uniprot	SiJWC09CAK2.scf	SiJWC09CAK2.scf		GO:0051082	SP:TBCC_HUMAN	IEA		F	NOT_ASSIGNED		transcript	taxon:13686	20060515	Uniprot
Uniprot	SiJWC09CAK2.scf	SiJWC09CAK2.scf		GO:0007025	SP:TBCC_HUMAN	IEA		P	NOT_ASSIGNED		transcript	taxon:13686	20060515	Uniprot
Uniprot	SiJWH06CAP.scf	SiJWH06CAP.scf		GO:0035023	SP:Q8N679_HUMAN	IEA		P	NOT_ASSIGNED		transcript	taxon:13686	20060515	Uniprot
Uniprot	SiJWH06CAP.scf	SiJWH06CAP.scf		GO:0007242	SP:Q8N679_HUMAN	IEA		P	NOT_ASSIGNED		transcript	taxon:13686	20060515	Uniprot
Uniprot	SiJWH06CAP.scf	SiJWH06CAP.scf		GO:0005085	SP:Q5REI0_PONPY	IEA		F	NOT_ASSIGNED		transcript	taxon:13686	20060515	Uniprot
Uniprot	SiJWH06CAP.scf	SiJWH06CAP.scf		GO:0005622	SP:Q8N679_HUMAN	IEA		C	NOT_ASSIGNED		transcript	taxon:13686	20060515	Uniprot
Uniprot	SiJWH06CAP.scf	SiJWH06CAP.scf		GO:0005089	SP:Q8N679_HUMAN	IEA		F	NOT_ASSIGNED		transcript	taxon:13686	20060515	Uniprot
Uniprot	SiJWB10BDF.scf	SiJWB10BDF.scf		GO:0000004	SP:ICT1_HUMAN	IEA		P	NOT_ASSIGNED		transcript	taxon:13686	20060515	Uniprot
Uniprot	SiJWB10BDF.scf	SiJWB10BDF.scf		GO:0006415	SP:ICT1_BOVIN	IEA		P	NOT_ASSIGNED		transcript	taxon:13686	20060515	Uniprot
Uniprot	SiJWB10BDF.scf	SiJWB10BDF.scf		GO:0003747	SP:ICT1_BOVIN	IEA		F	NOT_ASSIGNED		transcript	taxon:13686	20060515	Uniprot
Uniprot	SiJWB10BDF.scf	SiJWB10BDF.scf		GO:0008372	SP:ICT1_HUMAN	IEA		C	NOT_ASSIGNED		transcript	taxon:13686	20060515	Uniprot
Uniprot	SiJWB10BDF.scf	SiJWB10BDF.scf		GO:0005554	SP:ICT1_HUMAN	IEA		F	NOT_ASSIGNED		transcript	taxon:13686	20060515	Uniprot
Uniprot	SI.CL.16.cl.1686.Contig1	SI.CL.16.cl.1686.Contig1		GO:0004437	SP:Q4R433_MACFA	IEA		F	NOT_ASSIGNED		transcript	taxon:13686	20060515	Uniprot
Uniprot	SI.CL.16.cl.1686.Contig1	SI.CL.16.cl.1686.Contig1		GO:0000139	SP:OCRL_HUMAN	IEA		C	NOT_ASSIGNED		transcript	taxon:13686	20060515	Uniprot
Uniprot	SI.CL.16.cl.1686.Contig1	SI.CL.16.cl.1686.Contig1		GO:0005529	SP:Q4RTB9_TETNG	IEA		F	NOT_ASSIGNED		transcript	taxon:13686	20060515	Uniprot
Uniprot	SI.CL.16.cl.1686.Contig1	SI.CL.16.cl.1686.Contig1		GO:0016787	SP:OCRL_HUMAN	IEA		F	NOT_ASSIGNED		transcript	taxon:13686	20060515	Uniprot
Uniprot	SI.CL.16.cl.1686.Contig1	SI.CL.16.cl.1686.Contig1		GO:0004439	SP:OCRL_HUMAN	IEA		F	NOT_ASSIGNED		transcript	taxon:13686	20060515	Uniprot
Uniprot	SI.CL.16.cl.1686.Contig1	SI.CL.16.cl.1686.Contig1		GO:0005798	SP:OCRL_HUMAN	IEA		C	NOT_ASSIGNED		transcript	taxon:13686	20060515	Uniprot
Uniprot	SI.CL.16.cl.1686.Contig1	SI.CL.16.cl.1686.Contig1		GO:0005795	SP:OCRL_HUMAN	IEA		C	NOT_ASSIGNED		transcript	taxon:13686	20060515	Uniprot
Uniprot	SI.CL.16.cl.1686.Contig1	SI.CL.16.cl.1686.Contig1		GO:0006629	SP:OCRL_HUMAN	IEA		P	NOT_ASSIGNED		transcript	taxon:13686	20060515	Uniprot
Uniprot	SI.CL.28.cl.2801.Contig1	SI.CL.28.cl.2801.Contig1		GO:0006412	SP:Q4GXG0_CICCA	IEA		P	NOT_ASSIGNED		transcript	taxon:13686	20060515	Uniprot
Uniprot	SI.CL.28.cl.2801.Contig1	SI.CL.28.cl.2801.Contig1		GO:0005840	SP:Q4GXG0_CICCA	IEA		C	NOT_ASSIGNED		transcript	taxon:13686	20060515	Uniprot
Uniprot	SI.CL.28.cl.2801.Contig1	SI.CL.28.cl.2801.Contig1		GO:0030529	SP:RL19_XENLA	IEA		C	NOT_ASSIGNED		transcript	taxon:13686	20060515	Uniprot
Uniprot	SI.CL.28.cl.2801.Contig1	SI.CL.28.cl.2801.Contig1		GO:0003735	SP:Q4GXG0_CICCA	IEA		F	NOT_ASSIGNED		transcript	taxon:13686	20060515	Uniprot
Uniprot	SI.CL.28.cl.2801.Contig1	SI.CL.28.cl.2801.Contig1		GO:0005622	SP:Q4GXG0_CICCA	IEA		C	NOT_ASSIGNED		transcript	taxon:13686	20060515	Uniprot
Uniprot	SiJWE12BBV2.scf	SiJWE12BBV2.scf		GO:0005634	SP:RBX2_HUMAN	IEA		C	NOT_ASSIGNED		transcript	taxon:13686	20060515	Uniprot
Uniprot	SiJWE12BBV2.scf	SiJWE12BBV2.scf		GO:0005507	SP:RBX2_HUMAN	IEA		F	NOT_ASSIGNED		transcript	taxon:13686	20060515	Uniprot
Uniprot	SiJWE12BBV2.scf	SiJWE12BBV2.scf		GO:0046872	SP:RBX2_HUMAN	IEA		F	NOT_ASSIGNED		transcript	taxon:13686	20060515	Uniprot
Uniprot	SiJWE12BBV2.scf	SiJWE12BBV2.scf		GO:0006512	SP:RBX2_HUMAN	IEA		P	NOT_ASSIGNED		transcript	taxon:13686	20060515	Uniprot
Uniprot	SiJWE12BBV2.scf	SiJWE12BBV2.scf		GO:0006916	SP:RBX2_HUMAN	IEA		P	NOT_ASSIGNED		transcript	taxon:13686	20060515	Uniprot
Uniprot	SiJWE12BBV2.scf	SiJWE12BBV2.scf		GO:0008631	SP:RBX2_HUMAN	IEA		P	NOT_ASSIGNED		transcript	taxon:13686	20060515	Uniprot
Uniprot	SiJWE12BBV2.scf	SiJWE12BBV2.scf		GO:0005737	SP:RBX2_HUMAN	IEA		C	NOT_ASSIGNED		transcript	taxon:13686	20060515	Uniprot
Uniprot	SiJWE12BBV2.scf	SiJWE12BBV2.scf		GO:0005515	SP:RBX2_HUMAN	IEA		F	NOT_ASSIGNED		transcript	taxon:13686	20060515	Uniprot
Uniprot	SiJWE12BBV2.scf	SiJWE12BBV2.scf		GO:0008270	SP:RBX2_HUMAN	IEA		F	NOT_ASSIGNED		transcript	taxon:13686	20060515	Uniprot
Uniprot	SiJWE12BBV2.scf	SiJWE12BBV2.scf		GO:0006980	SP:RBX2_HUMAN	IEA		P	NOT_ASSIGNED		transcript	taxon:13686	20060515	Uniprot
Uniprot	SiJWB07BBS.scf	SiJWB07BBS.scf		GO:0006350	SP:CRSP3_HUMAN	IEA		P	NOT_ASSIGNED		transcript	taxon:13686	20060515	Uniprot
Uniprot	SiJWB07BBS.scf	SiJWB07BBS.scf		GO:0030528	SP:CRSP3_HUMAN	IEA		F	NOT_ASSIGNED		transcript	taxon:13686	20060515	Uniprot
Uniprot	SiJWB07BBS.scf	SiJWB07BBS.scf		GO:0005667	SP:CRSP3_HUMAN	IEA		C	NOT_ASSIGNED		transcript	taxon:13686	20060515	Uniprot
Uniprot	SiJWB07BBS.scf	SiJWB07BBS.scf		GO:0006367	SP:CRSP3_HUMAN	IEA		P	NOT_ASSIGNED		transcript	taxon:13686	20060515	Uniprot
Uniprot	SiJWB07BBS.scf	SiJWB07BBS.scf		GO:0003713	SP:CRSP3_HUMAN	IEA		F	NOT_ASSIGNED		transcript	taxon:13686	20060515	Uniprot
Uniprot	SiJWB07BBS.scf	SiJWB07BBS.scf		GO:0006357	SP:CRSP3_HUMAN	IEA		P	NOT_ASSIGNED		transcript	taxon:13686	20060515	Uniprot
Uniprot	SiJWB07BBS.scf	SiJWB07BBS.scf		GO:0004872	SP:CRSP3_HUMAN	IEA		F	NOT_ASSIGNED		transcript	taxon:13686	20060515	Uniprot
Uniprot	SiJWB06ABY.scf	SiJWB06ABY.scf		GO:0004067	SP:Q3CUA8_ALTAT	IEA		F	NOT_ASSIGNED		transcript	taxon:13686	20060515	Uniprot
Uniprot	SiJWB06ABY.scf	SiJWB06ABY.scf		GO:0006412	SP:Q4SA00_TETNG	IEA		P	NOT_ASSIGNED		transcript	taxon:13686	20060515	Uniprot
Uniprot	SiJWB06ABY.scf	SiJWB06ABY.scf		GO:0003948	SP:Q3BQL0_XANC5	IEA		F	NOT_ASSIGNED		transcript	taxon:13686	20060515	Uniprot
Uniprot	SiJWB06ABY.scf	SiJWB06ABY.scf		GO:0016874	SP:Q4SA00_TETNG	IEA		F	NOT_ASSIGNED		transcript	taxon:13686	20060515	Uniprot
Uniprot	SiJWB06ABY.scf	SiJWB06ABY.scf		GO:0008415	SP:Q4SA00_TETNG	IEA		F	NOT_ASSIGNED		transcript	taxon:13686	20060515	Uniprot
Uniprot	SiJWB06ABY.scf	SiJWB06ABY.scf		GO:0006418	SP:Q4SA00_TETNG	IEA		P	NOT_ASSIGNED		transcript	taxon:13686	20060515	Uniprot
Uniprot	SiJWB06ABY.scf	SiJWB06ABY.scf		GO:0000166	SP:Q4SA00_TETNG	IEA		F	NOT_ASSIGNED		transcript	taxon:13686	20060515	Uniprot
Uniprot	SiJWB06ABY.scf	SiJWB06ABY.scf		GO:0005524	SP:Q4SA00_TETNG	IEA		F	NOT_ASSIGNED		transcript	taxon:13686	20060515	Uniprot
Uniprot	SiJWB06ABY.scf	SiJWB06ABY.scf		GO:0016787	SP:Q3CUA8_ALTAT	IEA		F	NOT_ASSIGNED		transcript	taxon:13686	20060515	Uniprot
Uniprot	SiJWB06ABY.scf	SiJWB06ABY.scf		GO:0005737	SP:Q4SA00_TETNG	IEA		C	NOT_ASSIGNED		transcript	taxon:13686	20060515	Uniprot
Uniprot	SiJWB06ABY.scf	SiJWB06ABY.scf		GO:0006516	SP:Q3CUA8_ALTAT	IEA		P	NOT_ASSIGNED		transcript	taxon:13686	20060515	Uniprot
Uniprot	SiJWB06ABY.scf	SiJWB06ABY.scf		GO:0004812	SP:Q4SA00_TETNG	IEA		F	NOT_ASSIGNED		transcript	taxon:13686	20060515	Uniprot
Uniprot	SiJWB06ABY.scf	SiJWB06ABY.scf		GO:0016740	SP:Q4SA00_TETNG	IEA		F	NOT_ASSIGNED		transcript	taxon:13686	20060515	Uniprot
Uniprot	SI.CL.9.cl.945.SiJWE09ADP.scf	SI.CL.9.cl.945.SiJWE09ADP.scf		GO:0005739	SP:Q2Q1H4_TIMCA	IEA		C	NOT_ASSIGNED		transcript	taxon:13686	20060515	Uniprot
Uniprot	SI.CL.9.cl.945.SiJWE09ADP.scf	SI.CL.9.cl.945.SiJWE09ADP.scf		GO:0042773	SP:Q2Q1H4_TIMCA	IEA		P	NOT_ASSIGNED		transcript	taxon:13686	20060515	Uniprot
Uniprot	SI.CL.9.cl.945.SiJWE09ADP.scf	SI.CL.9.cl.945.SiJWE09ADP.scf		GO:0008137	SP:Q2Q1H4_TIMCA	IEA		F	NOT_ASSIGNED		transcript	taxon:13686	20060515	Uniprot
Uniprot	SI.CL.9.cl.945.SiJWE09ADP.scf	SI.CL.9.cl.945.SiJWE09ADP.scf		GO:0016491	SP:Q4TWA6_HAEIR	IEA		F	NOT_ASSIGNED		transcript	taxon:13686	20060515	Uniprot
Uniprot	SI.CL.9.cl.945.SiJWE09ADP.scf	SI.CL.9.cl.945.SiJWE09ADP.scf		GO:0006120	SP:Q2Q1H4_TIMCA	IEA		P	NOT_ASSIGNED		transcript	taxon:13686	20060515	Uniprot
Uniprot	SI.CL.2.cl.242.Contig1	SI.CL.2.cl.242.Contig1		GO:0005488	SP:Q9AHK8_BORBU	IEA		F	NOT_ASSIGNED		transcript	taxon:13686	20060515	Uniprot
Uniprot	SI.CL.27.cl.2728.Contig1	SI.CL.27.cl.2728.Contig1		GO:0005783	SP:RINT1_HUMAN	IEA		C	NOT_ASSIGNED		transcript	taxon:13686	20060515	Uniprot
Uniprot	SI.CL.27.cl.2728.Contig1	SI.CL.27.cl.2728.Contig1		GO:0007049	SP:RINT1_HUMAN	IEA		P	NOT_ASSIGNED		transcript	taxon:13686	20060515	Uniprot
Uniprot	SI.CL.27.cl.2728.Contig1	SI.CL.27.cl.2728.Contig1		GO:0005795	SP:RINT1_HUMAN	IEA		C	NOT_ASSIGNED		transcript	taxon:13686	20060515	Uniprot
Uniprot	SI.CL.27.cl.2728.Contig1	SI.CL.27.cl.2728.Contig1		GO:0006888	SP:RINT1_HUMAN	IEA		P	NOT_ASSIGNED		transcript	taxon:13686	20060515	Uniprot
Uniprot	SI.CL.27.cl.2728.Contig1	SI.CL.27.cl.2728.Contig1		GO:0006810	SP:RINT1_HUMAN	IEA		P	NOT_ASSIGNED		transcript	taxon:13686	20060515	Uniprot
Uniprot	SiJWB07BBZ.scf	SiJWB07BBZ.scf		GO:0006974	SP:RAD50_AQUAE	IEA		P	NOT_ASSIGNED		transcript	taxon:13686	20060515	Uniprot
Uniprot	SiJWB07BBZ.scf	SiJWB07BBZ.scf		GO:0003774	SP:Q9H6N6_HUMAN	IEA		F	NOT_ASSIGNED		transcript	taxon:13686	20060515	Uniprot
Uniprot	SiJWB07BBZ.scf	SiJWB07BBZ.scf		GO:0046872	SP:RAD50_AQUAE	IEA		F	NOT_ASSIGNED		transcript	taxon:13686	20060515	Uniprot
Uniprot	SiJWB07BBZ.scf	SiJWB07BBZ.scf		GO:0006281	SP:RAD50_AQUAE	IEA		P	NOT_ASSIGNED		transcript	taxon:13686	20060515	Uniprot
Uniprot	SiJWB07BBZ.scf	SiJWB07BBZ.scf		GO:0004527	SP:RAD50_AQUAE	IEA		F	NOT_ASSIGNED		transcript	taxon:13686	20060515	Uniprot
Uniprot	SiJWB07BBZ.scf	SiJWB07BBZ.scf		GO:0016887	SP:RAD50_AQUAE	IEA		F	NOT_ASSIGNED		transcript	taxon:13686	20060515	Uniprot
Uniprot	SiJWB07BBZ.scf	SiJWB07BBZ.scf		GO:0000166	SP:RAD50_AQUAE	IEA		F	NOT_ASSIGNED		transcript	taxon:13686	20060515	Uniprot
Uniprot	SiJWB07BBZ.scf	SiJWB07BBZ.scf		GO:0005694	SP:RAD50_AQUAE	IEA		C	NOT_ASSIGNED		transcript	taxon:13686	20060515	Uniprot
Uniprot	SiJWB07BBZ.scf	SiJWB07BBZ.scf		GO:0005524	SP:RAD50_AQUAE	IEA		F	NOT_ASSIGNED		transcript	taxon:13686	20060515	Uniprot
Uniprot	SiJWB07BBZ.scf	SiJWB07BBZ.scf		GO:0016787	SP:RAD50_AQUAE	IEA		F	NOT_ASSIGNED		transcript	taxon:13686	20060515	Uniprot
Uniprot	SiJWB07BBZ.scf	SiJWB07BBZ.scf		GO:0016459	SP:Q9H6N6_HUMAN	IEA		C	NOT_ASSIGNED		transcript	taxon:13686	20060515	Uniprot
Uniprot	SiJWB07BBZ.scf	SiJWB07BBZ.scf		GO:0006259	SP:RAD50_AQUAE	IEA		P	NOT_ASSIGNED		transcript	taxon:13686	20060515	Uniprot
Uniprot	SiJWB07BBZ.scf	SiJWB07BBZ.scf		GO:0051276	SP:RAD50_AQUAE	IEA		P	NOT_ASSIGNED		transcript	taxon:13686	20060515	Uniprot
Uniprot	SiJWB07BBZ.scf	SiJWB07BBZ.scf		GO:0008270	SP:RAD50_AQUAE	IEA		F	NOT_ASSIGNED		transcript	taxon:13686	20060515	Uniprot
Uniprot	SiJWG05BDV2.scf	SiJWG05BDV2.scf		GO:0006313	SP:Q5TNX8_ANOGA	IEA		P	NOT_ASSIGNED		transcript	taxon:13686	20060515	Uniprot
Uniprot	SiJWG05BDV2.scf	SiJWG05BDV2.scf		GO:0003677	SP:Q5TNX8_ANOGA	IEA		F	NOT_ASSIGNED		transcript	taxon:13686	20060515	Uniprot
Uniprot	SiJWG05BDV2.scf	SiJWG05BDV2.scf		GO:0004803	SP:Q5TNX8_ANOGA	IEA		F	NOT_ASSIGNED		transcript	taxon:13686	20060515	Uniprot
Uniprot	SiJWH10BAE.scf	SiJWH10BAE.scf		GO:0043565	SP:Q7PUY0_ANOGA	IEA		F	NOT_ASSIGNED		transcript	taxon:13686	20060515	Uniprot
Uniprot	SiJWH10BAE.scf	SiJWH10BAE.scf		GO:0005634	SP:Q7PUY0_ANOGA	IEA		C	NOT_ASSIGNED		transcript	taxon:13686	20060515	Uniprot
Uniprot	SiJWH10BAE.scf	SiJWH10BAE.scf		GO:0046872	SP:Q7PUY0_ANOGA	IEA		F	NOT_ASSIGNED		transcript	taxon:13686	20060515	Uniprot
Uniprot	SiJWH10BAE.scf	SiJWH10BAE.scf		GO:0004879	SP:Q7PUY0_ANOGA	IEA		F	NOT_ASSIGNED		transcript	taxon:13686	20060515	Uniprot
Uniprot	SiJWH10BAE.scf	SiJWH10BAE.scf		GO:0003707	SP:Q7PUY0_ANOGA	IEA		F	NOT_ASSIGNED		transcript	taxon:13686	20060515	Uniprot
Uniprot	SiJWH10BAE.scf	SiJWH10BAE.scf		GO:0003677	SP:Q7PUY0_ANOGA	IEA		F	NOT_ASSIGNED		transcript	taxon:13686	20060515	Uniprot
Uniprot	SiJWH10BAE.scf	SiJWH10BAE.scf		GO:0006350	SP:Q7PUY0_ANOGA	IEA		P	NOT_ASSIGNED		transcript	taxon:13686	20060515	Uniprot
Uniprot	SiJWH10BAE.scf	SiJWH10BAE.scf		GO:0008270	SP:Q7PUY0_ANOGA	IEA		F	NOT_ASSIGNED		transcript	taxon:13686	20060515	Uniprot
Uniprot	SiJWH10BAE.scf	SiJWH10BAE.scf		GO:0003700	SP:Q7PUY0_ANOGA	IEA		F	NOT_ASSIGNED		transcript	taxon:13686	20060515	Uniprot
Uniprot	SiJWH10BAE.scf	SiJWH10BAE.scf		GO:0004872	SP:Q7PUY0_ANOGA	IEA		F	NOT_ASSIGNED		transcript	taxon:13686	20060515	Uniprot
Uniprot	SiJWH10BAE.scf	SiJWH10BAE.scf		GO:0006355	SP:Q7PUY0_ANOGA	IEA		P	NOT_ASSIGNED		transcript	taxon:13686	20060515	Uniprot
Uniprot	SiJWF06BAO.scf	SiJWF06BAO.scf		GO:0005634	SP:GLE1_BOVIN	IEA		C	NOT_ASSIGNED		transcript	taxon:13686	20060515	Uniprot
Uniprot	SiJWF06BAO.scf	SiJWF06BAO.scf		GO:0006397	SP:GLE1_BOVIN	IEA		P	NOT_ASSIGNED		transcript	taxon:13686	20060515	Uniprot
Uniprot	SiJWF06BAO.scf	SiJWF06BAO.scf		GO:0015031	SP:GLE1_BOVIN	IEA		P	NOT_ASSIGNED		transcript	taxon:13686	20060515	Uniprot
Uniprot	SiJWF06BAO.scf	SiJWF06BAO.scf		GO:0006605	SP:GLE1_BOVIN	IEA		P	NOT_ASSIGNED		transcript	taxon:13686	20060515	Uniprot
Uniprot	SiJWF06BAO.scf	SiJWF06BAO.scf		GO:0016973	SP:GLE1_BOVIN	IEA		P	NOT_ASSIGNED		transcript	taxon:13686	20060515	Uniprot
Uniprot	SiJWF06BAO.scf	SiJWF06BAO.scf		GO:0005643	SP:GLE1_BOVIN	IEA		C	NOT_ASSIGNED		transcript	taxon:13686	20060515	Uniprot
Uniprot	SiJWF06BAO.scf	SiJWF06BAO.scf		GO:0006406	SP:GLE1_PONPY	IEA		P	NOT_ASSIGNED		transcript	taxon:13686	20060515	Uniprot
Uniprot	SiJWF06BAO.scf	SiJWF06BAO.scf		GO:0006810	SP:GLE1_PONPY	IEA		P	NOT_ASSIGNED		transcript	taxon:13686	20060515	Uniprot
Uniprot	SiJWH11AAA2.scf	SiJWH11AAA2.scf		GO:0005923	SP:Q7PS72_ANOGA	IEA		C	NOT_ASSIGNED		transcript	taxon:13686	20060515	Uniprot
Uniprot	SiJWH11AAA2.scf	SiJWH11AAA2.scf		GO:0005198	SP:Q7PS72_ANOGA	IEA		F	NOT_ASSIGNED		transcript	taxon:13686	20060515	Uniprot
Uniprot	SiJWH08ACO.scf	SiJWH08ACO.scf		GO:0008202	SP:Q8TAS8_HUMAN	IEA		P	NOT_ASSIGNED		transcript	taxon:13686	20060515	Uniprot
Uniprot	SiJWH08ACO.scf	SiJWH08ACO.scf		GO:0006869	SP:Q8TAS8_HUMAN	IEA		P	NOT_ASSIGNED		transcript	taxon:13686	20060515	Uniprot
Uniprot	SiJWH08ACO.scf	SiJWH08ACO.scf		GO:0006810	SP:Q4RUE4_TETNG	IEA		P	NOT_ASSIGNED		transcript	taxon:13686	20060515	Uniprot
Uniprot	SI.CL.32.cl.3209.Contig1	SI.CL.32.cl.3209.Contig1		GO:0005739	SP:NUEM_BOVIN	IEA		C	NOT_ASSIGNED		transcript	taxon:13686	20060515	Uniprot
Uniprot	SI.CL.32.cl.3209.Contig1	SI.CL.32.cl.3209.Contig1		GO:0008137	SP:NUEM_HUMAN	IEA		F	NOT_ASSIGNED		transcript	taxon:13686	20060515	Uniprot
Uniprot	SI.CL.32.cl.3209.Contig1	SI.CL.32.cl.3209.Contig1		GO:0016564	SP:Q5DCH0_SCHJA	IEA		F	NOT_ASSIGNED		transcript	taxon:13686	20060515	Uniprot
Uniprot	SI.CL.32.cl.3209.Contig1	SI.CL.32.cl.3209.Contig1		GO:0005759	SP:NUEM_HUMAN	IEA		C	NOT_ASSIGNED		transcript	taxon:13686	20060515	Uniprot
Uniprot	SI.CL.32.cl.3209.Contig1	SI.CL.32.cl.3209.Contig1		GO:0016491	SP:NUEM_BOVIN	IEA		F	NOT_ASSIGNED		transcript	taxon:13686	20060515	Uniprot
Uniprot	SI.CL.32.cl.3209.Contig1	SI.CL.32.cl.3209.Contig1		GO:0009225	SP:NUEM_BOVIN	IEA		P	NOT_ASSIGNED		transcript	taxon:13686	20060515	Uniprot
Uniprot	SI.CL.32.cl.3209.Contig1	SI.CL.32.cl.3209.Contig1		GO:0003954	SP:NUEM_BOVIN	IEA		F	NOT_ASSIGNED		transcript	taxon:13686	20060515	Uniprot
Uniprot	SI.CL.32.cl.3209.Contig1	SI.CL.32.cl.3209.Contig1		GO:0006814	SP:NUEM_HUMAN	IEA		P	NOT_ASSIGNED		transcript	taxon:13686	20060515	Uniprot
Uniprot	SI.CL.32.cl.3209.Contig1	SI.CL.32.cl.3209.Contig1		GO:0006808	SP:Q5DCH0_SCHJA	IEA		P	NOT_ASSIGNED		transcript	taxon:13686	20060515	Uniprot
Uniprot	SI.CL.32.cl.3209.Contig1	SI.CL.32.cl.3209.Contig1		GO:0051287	SP:NUEM_BOVIN	IEA		F	NOT_ASSIGNED		transcript	taxon:13686	20060515	Uniprot
Uniprot	SI.CL.32.cl.3209.Contig1	SI.CL.32.cl.3209.Contig1		GO:0003824	SP:Q5ZI00_CHICK	IEA		F	NOT_ASSIGNED		transcript	taxon:13686	20060515	Uniprot
Uniprot	SiJWD06ADU.scf	SiJWD06ADU.scf		GO:0006366	SP:TMF1_HUMAN	IEA		P	NOT_ASSIGNED		transcript	taxon:13686	20060515	Uniprot
Uniprot	SiJWD06ADU.scf	SiJWD06ADU.scf		GO:0006350	SP:TMF1_HUMAN	IEA		P	NOT_ASSIGNED		transcript	taxon:13686	20060515	Uniprot
Uniprot	SiJWD06ADU.scf	SiJWD06ADU.scf		GO:0003712	SP:TMF1_HUMAN	IEA		F	NOT_ASSIGNED		transcript	taxon:13686	20060515	Uniprot
Uniprot	SiJWD06ADU.scf	SiJWD06ADU.scf		GO:0003677	SP:TMF1_HUMAN	IEA		F	NOT_ASSIGNED		transcript	taxon:13686	20060515	Uniprot
Uniprot	SiJWD06ADU.scf	SiJWD06ADU.scf		GO:0006355	SP:TMF1_HUMAN	IEA		P	NOT_ASSIGNED		transcript	taxon:13686	20060515	Uniprot
Uniprot	SiJWD06ADU.scf	SiJWD06ADU.scf		GO:0003702	SP:TMF1_HUMAN	IEA		F	NOT_ASSIGNED		transcript	taxon:13686	20060515	Uniprot
Uniprot	SI.CL.42.cl.4243.Contig1	SI.CL.42.cl.4243.Contig1		GO:0005488	SP:O61236_MANSE	IEA		F	NOT_ASSIGNED		transcript	taxon:13686	20060515	Uniprot
Uniprot	SI.CL.42.cl.4243.Contig1	SI.CL.42.cl.4243.Contig1		GO:0008289	SP:O61236_MANSE	IEA		F	NOT_ASSIGNED		transcript	taxon:13686	20060515	Uniprot
Uniprot	SI.CL.42.cl.4243.Contig1	SI.CL.42.cl.4243.Contig1		GO:0006810	SP:O61236_MANSE	IEA		P	NOT_ASSIGNED		transcript	taxon:13686	20060515	Uniprot
Uniprot	SI.CL.1.cl.105.SiJWD05BDPR5G05.scf	SI.CL.1.cl.105.SiJWD05BDPR5G05.scf		GO:0005739	SP:MYCBP_HUMAN	IEA		C	NOT_ASSIGNED		transcript	taxon:13686	20060515	Uniprot
Uniprot	SI.CL.1.cl.105.SiJWD05BDPR5G05.scf	SI.CL.1.cl.105.SiJWD05BDPR5G05.scf		GO:0005634	SP:MYCBP_HUMAN	IEA		C	NOT_ASSIGNED		transcript	taxon:13686	20060515	Uniprot
Uniprot	SI.CL.1.cl.105.SiJWD05BDPR5G05.scf	SI.CL.1.cl.105.SiJWD05BDPR5G05.scf		GO:0003713	SP:MYCBP_HUMAN	IEA		F	NOT_ASSIGNED		transcript	taxon:13686	20060515	Uniprot
Uniprot	SI.CL.1.cl.105.SiJWD05BDPR5G05.scf	SI.CL.1.cl.105.SiJWD05BDPR5G05.scf		GO:0006350	SP:MYCBP_HUMAN	IEA		P	NOT_ASSIGNED		transcript	taxon:13686	20060515	Uniprot
Uniprot	SI.CL.1.cl.105.SiJWD05BDPR5G05.scf	SI.CL.1.cl.105.SiJWD05BDPR5G05.scf		GO:0003677	SP:Q4CSQ1_TRYCR	IEA		F	NOT_ASSIGNED		transcript	taxon:13686	20060515	Uniprot
Uniprot	SI.CL.1.cl.105.SiJWD05BDPR5G05.scf	SI.CL.1.cl.105.SiJWD05BDPR5G05.scf		GO:0005515	SP:MYCBP_HUMAN	IEA		F	NOT_ASSIGNED		transcript	taxon:13686	20060515	Uniprot
Uniprot	SI.CL.1.cl.105.SiJWD05BDPR5G05.scf	SI.CL.1.cl.105.SiJWD05BDPR5G05.scf		GO:0003700	SP:Q4FVU7_LEIMA	IEA		F	NOT_ASSIGNED		transcript	taxon:13686	20060515	Uniprot
Uniprot	SI.CL.1.cl.105.SiJWD05BDPR5G05.scf	SI.CL.1.cl.105.SiJWD05BDPR5G05.scf		GO:0006355	SP:MYCBP_HUMAN	IEA		P	NOT_ASSIGNED		transcript	taxon:13686	20060515	Uniprot
Uniprot	SI.CL.32.cl.3267.Contig1	SI.CL.32.cl.3267.Contig1		GO:0005524	SP:Q4DQQ7_TRYCR	IEA		F	NOT_ASSIGNED		transcript	taxon:13686	20060515	Uniprot
Uniprot	SI.CL.32.cl.3267.Contig1	SI.CL.32.cl.3267.Contig1		GO:0006438	SP:Q4DQQ7_TRYCR	IEA		P	NOT_ASSIGNED		transcript	taxon:13686	20060515	Uniprot
Uniprot	SI.CL.32.cl.3267.Contig1	SI.CL.32.cl.3267.Contig1		GO:0004832	SP:Q4DQQ7_TRYCR	IEA		F	NOT_ASSIGNED		transcript	taxon:13686	20060515	Uniprot
Uniprot	SI.CL.32.cl.3267.Contig1	SI.CL.32.cl.3267.Contig1		GO:0004812	SP:Q4DQQ7_TRYCR	IEA		F	NOT_ASSIGNED		transcript	taxon:13686	20060515	Uniprot
Uniprot	SI.CL.32.cl.3267.Contig1	SI.CL.32.cl.3267.Contig1		GO:0016874	SP:Q4DQQ7_TRYCR	IEA		F	NOT_ASSIGNED		transcript	taxon:13686	20060515	Uniprot
Uniprot	SI.CL.32.cl.3267.Contig1	SI.CL.32.cl.3267.Contig1		GO:0006418	SP:Q4DQQ7_TRYCR	IEA		P	NOT_ASSIGNED		transcript	taxon:13686	20060515	Uniprot
Uniprot	SI.CL.25.cl.2528.SiJWA11BAF.scf	SI.CL.25.cl.2528.SiJWA11BAF.scf		GO:0030154	SP:JANA_DROYA	IEA		P	NOT_ASSIGNED		transcript	taxon:13686	20060515	Uniprot
Uniprot	SI.CL.25.cl.2528.SiJWA11BAF.scf	SI.CL.25.cl.2528.SiJWA11BAF.scf		GO:0007548	SP:JANA_DROYA	IEA		P	NOT_ASSIGNED		transcript	taxon:13686	20060515	Uniprot
Uniprot	SI.CL.25.cl.2528.SiJWA11BAF.scf	SI.CL.25.cl.2528.SiJWA11BAF.scf		GO:0008372	SP:JANA_DROYA	IEA		C	NOT_ASSIGNED		transcript	taxon:13686	20060515	Uniprot
Uniprot	SI.CL.25.cl.2528.SiJWA11BAF.scf	SI.CL.25.cl.2528.SiJWA11BAF.scf		GO:0005554	SP:JANA_DROYA	IEA		F	NOT_ASSIGNED		transcript	taxon:13686	20060515	Uniprot
Uniprot	SiJWA09BAQ.scf	SiJWA09BAQ.scf		GO:0005634	SP:DHX33_HUMAN	IEA		C	NOT_ASSIGNED		transcript	taxon:13686	20060515	Uniprot
Uniprot	SiJWA09BAQ.scf	SiJWA09BAQ.scf		GO:0000166	SP:DHX33_HUMAN	IEA		F	NOT_ASSIGNED		transcript	taxon:13686	20060515	Uniprot
Uniprot	SiJWA09BAQ.scf	SiJWA09BAQ.scf		GO:0004386	SP:Q4THT6_TETNG	IEA		F	NOT_ASSIGNED		transcript	taxon:13686	20060515	Uniprot
Uniprot	SiJWA09BAQ.scf	SiJWA09BAQ.scf		GO:0005524	SP:DHX33_HUMAN	IEA		F	NOT_ASSIGNED		transcript	taxon:13686	20060515	Uniprot
Uniprot	SiJWA09BAQ.scf	SiJWA09BAQ.scf		GO:0016787	SP:DHX33_HUMAN	IEA		F	NOT_ASSIGNED		transcript	taxon:13686	20060515	Uniprot
Uniprot	SiJWA09BAQ.scf	SiJWA09BAQ.scf		GO:0003676	SP:DHX33_HUMAN	IEA		F	NOT_ASSIGNED		transcript	taxon:13686	20060515	Uniprot
Uniprot	SiJWA09BAQ.scf	SiJWA09BAQ.scf		GO:0017111	SP:Q5TR49_ANOGA	IEA		F	NOT_ASSIGNED		transcript	taxon:13686	20060515	Uniprot
Uniprot	SiJWA09BAQ.scf	SiJWA09BAQ.scf		GO:0008026	SP:DHX33_HUMAN	IEA		F	NOT_ASSIGNED		transcript	taxon:13686	20060515	Uniprot
Uniprot	SiJWH04BBR.scf	SiJWH04BBR.scf		GO:0005488	SP:Q7PX51_ANOGA	IEA		F	NOT_ASSIGNED		transcript	taxon:13686	20060515	Uniprot
Uniprot	SI.CL.41.cl.4117.Contig1	SI.CL.41.cl.4117.Contig1		GO:0003677	SP:Q6L3Y5_SOLDE	IEA		F	NOT_ASSIGNED		transcript	taxon:13686	20060515	Uniprot
Uniprot	SI.CL.41.cl.4117.Contig1	SI.CL.41.cl.4117.Contig1		GO:0015074	SP:Q6L3Y5_SOLDE	IEA		P	NOT_ASSIGNED		transcript	taxon:13686	20060515	Uniprot
Uniprot	SiJWD11BDS2.scf	SiJWD11BDS2.scf		GO:0006412	SP:I2C3_HUMAN	IEA		P	NOT_ASSIGNED		transcript	taxon:13686	20060515	Uniprot
Uniprot	SiJWD11BDS2.scf	SiJWD11BDS2.scf		GO:0003743	SP:Q5JV32_HUMAN	IEA		F	NOT_ASSIGNED		transcript	taxon:13686	20060515	Uniprot
Uniprot	SI.CL.33.cl.3317.Contig1	SI.CL.33.cl.3317.Contig1		GO:0005793	SP:TMED5_HUMAN	IEA		C	NOT_ASSIGNED		transcript	taxon:13686	20060515	Uniprot
Uniprot	SI.CL.33.cl.3317.Contig1	SI.CL.33.cl.3317.Contig1		GO:0005783	SP:TMED5_HUMAN	IEA		C	NOT_ASSIGNED		transcript	taxon:13686	20060515	Uniprot
Uniprot	SI.CL.33.cl.3317.Contig1	SI.CL.33.cl.3317.Contig1		GO:0016020	SP:TMED5_HUMAN	IEA		C	NOT_ASSIGNED		transcript	taxon:13686	20060515	Uniprot
Uniprot	SI.CL.33.cl.3317.Contig1	SI.CL.33.cl.3317.Contig1		GO:0016021	SP:TMED5_HUMAN	IEA		C	NOT_ASSIGNED		transcript	taxon:13686	20060515	Uniprot
Uniprot	SI.CL.33.cl.3317.Contig1	SI.CL.33.cl.3317.Contig1		GO:0006810	SP:TMED5_HUMAN	IEA		P	NOT_ASSIGNED		transcript	taxon:13686	20060515	Uniprot
Uniprot	SI.CL.26.cl.2677.Contig1	SI.CL.26.cl.2677.Contig1		GO:0019226	SP:CNTP2_HUMAN	IEA		P	NOT_ASSIGNED		transcript	taxon:13686	20060515	Uniprot
Uniprot	SI.CL.26.cl.2677.Contig1	SI.CL.26.cl.2677.Contig1		GO:0016020	SP:CNTP2_HUMAN	IEA		C	NOT_ASSIGNED		transcript	taxon:13686	20060515	Uniprot
Uniprot	SI.CL.26.cl.2677.Contig1	SI.CL.26.cl.2677.Contig1		GO:0008038	SP:CNTP2_HUMAN	IEA		P	NOT_ASSIGNED		transcript	taxon:13686	20060515	Uniprot
Uniprot	SI.CL.26.cl.2677.Contig1	SI.CL.26.cl.2677.Contig1		GO:0005515	SP:CNTP2_HUMAN	IEA		F	NOT_ASSIGNED		transcript	taxon:13686	20060515	Uniprot
Uniprot	SI.CL.26.cl.2677.Contig1	SI.CL.26.cl.2677.Contig1		GO:0016021	SP:CNTP2_HUMAN	IEA		C	NOT_ASSIGNED		transcript	taxon:13686	20060515	Uniprot
Uniprot	SI.CL.26.cl.2677.Contig1	SI.CL.26.cl.2677.Contig1		GO:0007155	SP:CNTP2_HUMAN	IEA		P	NOT_ASSIGNED		transcript	taxon:13686	20060515	Uniprot
Uniprot	SiJWH08AAV.scf	SiJWH08AAV.scf		GO:0005634	SP:LA_AEDAL	IEA		C	NOT_ASSIGNED		transcript	taxon:13686	20060515	Uniprot
Uniprot	SiJWH08AAV.scf	SiJWH08AAV.scf		GO:0000166	SP:LA_AEDAL	IEA		F	NOT_ASSIGNED		transcript	taxon:13686	20060515	Uniprot
Uniprot	SiJWH08AAV.scf	SiJWH08AAV.scf		GO:0006396	SP:LA_AEDAL	IEA		P	NOT_ASSIGNED		transcript	taxon:13686	20060515	Uniprot
Uniprot	SiJWH08AAV.scf	SiJWH08AAV.scf		GO:0003677	SP:LA_AEDAL	IEA		F	NOT_ASSIGNED		transcript	taxon:13686	20060515	Uniprot
Uniprot	SiJWH08AAV.scf	SiJWH08AAV.scf		GO:0003676	SP:LA_AEDAL	IEA		F	NOT_ASSIGNED		transcript	taxon:13686	20060515	Uniprot
Uniprot	SiJWH08AAV.scf	SiJWH08AAV.scf		GO:0030529	SP:LA_AEDAL	IEA		C	NOT_ASSIGNED		transcript	taxon:13686	20060515	Uniprot
Uniprot	SiJWH08AAV.scf	SiJWH08AAV.scf		GO:0005737	SP:LA_AEDAL	IEA		C	NOT_ASSIGNED		transcript	taxon:13686	20060515	Uniprot
Uniprot	SiJWH08AAV.scf	SiJWH08AAV.scf		GO:0006405	SP:LA_AEDAL	IEA		P	NOT_ASSIGNED		transcript	taxon:13686	20060515	Uniprot
Uniprot	SiJWH08AAV.scf	SiJWH08AAV.scf		GO:0003723	SP:LA_AEDAL	IEA		F	NOT_ASSIGNED		transcript	taxon:13686	20060515	Uniprot
Uniprot	SI.CL.26.cl.2680.SiJWF10BAM.scf	SI.CL.26.cl.2680.SiJWF10BAM.scf		GO:0005634	SP:LSM7_HUMAN	IEA		C	NOT_ASSIGNED		transcript	taxon:13686	20060515	Uniprot
Uniprot	SI.CL.26.cl.2680.SiJWF10BAM.scf	SI.CL.26.cl.2680.SiJWF10BAM.scf		GO:0006397	SP:Q5ZL52_CHICK	IEA		P	NOT_ASSIGNED		transcript	taxon:13686	20060515	Uniprot
Uniprot	SI.CL.26.cl.2680.SiJWF10BAM.scf	SI.CL.26.cl.2680.SiJWF10BAM.scf		GO:0005732	SP:LSM7_HUMAN	IEA		C	NOT_ASSIGNED		transcript	taxon:13686	20060515	Uniprot
Uniprot	SI.CL.26.cl.2680.SiJWF10BAM.scf	SI.CL.26.cl.2680.SiJWF10BAM.scf		GO:0030529	SP:Q4RUA1_TETNG	IEA		C	NOT_ASSIGNED		transcript	taxon:13686	20060515	Uniprot
Uniprot	SI.CL.26.cl.2680.SiJWF10BAM.scf	SI.CL.26.cl.2680.SiJWF10BAM.scf		GO:0005515	SP:LSM7_HUMAN	IEA		F	NOT_ASSIGNED		transcript	taxon:13686	20060515	Uniprot
Uniprot	SI.CL.26.cl.2680.SiJWF10BAM.scf	SI.CL.26.cl.2680.SiJWF10BAM.scf		GO:0000398	SP:LSM7_HUMAN	IEA		P	NOT_ASSIGNED		transcript	taxon:13686	20060515	Uniprot
Uniprot	SI.CL.26.cl.2680.SiJWF10BAM.scf	SI.CL.26.cl.2680.SiJWF10BAM.scf		GO:0017070	SP:LSM7_HUMAN	IEA		F	NOT_ASSIGNED		transcript	taxon:13686	20060515	Uniprot
Uniprot	SI.CL.26.cl.2680.SiJWF10BAM.scf	SI.CL.26.cl.2680.SiJWF10BAM.scf		GO:0003723	SP:LSM7_HUMAN	IEA		F	NOT_ASSIGNED		transcript	taxon:13686	20060515	Uniprot
Uniprot	SiJWE10BBA.scf	SiJWE10BBA.scf		GO:0004556	SP:Q7Q0D8_ANOGA	IEA		F	NOT_ASSIGNED		transcript	taxon:13686	20060515	Uniprot
Uniprot	SiJWE10BBA.scf	SiJWE10BBA.scf		GO:0005975	SP:Q7Q0D8_ANOGA	IEA		P	NOT_ASSIGNED		transcript	taxon:13686	20060515	Uniprot
Uniprot	SI.CL.42.cl.4269.SiJWE11BBD2.scf	SI.CL.42.cl.4269.SiJWE11BBD2.scf		GO:0006464	SP:Q5ZHQ1_CHICK	IEA		P	NOT_ASSIGNED		transcript	taxon:13686	20060515	Uniprot
Uniprot	SI.CL.42.cl.4269.SiJWE11BBD2.scf	SI.CL.42.cl.4269.SiJWE11BBD2.scf		GO:0000776	SP:SUMO3_HUMAN	IEA		C	NOT_ASSIGNED		transcript	taxon:13686	20060515	Uniprot
Uniprot	SI.CL.42.cl.4269.SiJWE11BBD2.scf	SI.CL.42.cl.4269.SiJWE11BBD2.scf		GO:0006512	SP:SUMO3_HUMAN	IEA		P	NOT_ASSIGNED		transcript	taxon:13686	20060515	Uniprot
Uniprot	SiJWF08BEA.scf	SiJWF08BEA.scf		GO:0016020	SP:SCAM1_HUMAN	IEA		C	NOT_ASSIGNED		transcript	taxon:13686	20060515	Uniprot
Uniprot	SiJWF08BEA.scf	SiJWF08BEA.scf		GO:0015031	SP:Q3T0D2_BOVIN	IEA		P	NOT_ASSIGNED		transcript	taxon:13686	20060515	Uniprot
Uniprot	SiJWF08BEA.scf	SiJWF08BEA.scf		GO:0005624	SP:SCAM1_HUMAN	IEA		C	NOT_ASSIGNED		transcript	taxon:13686	20060515	Uniprot
Uniprot	SiJWF08BEA.scf	SiJWF08BEA.scf		GO:0016021	SP:Q3T0D2_BOVIN	IEA		C	NOT_ASSIGNED		transcript	taxon:13686	20060515	Uniprot
Uniprot	SiJWF08BEA.scf	SiJWF08BEA.scf		GO:0006892	SP:SCAM1_HUMAN	IEA		P	NOT_ASSIGNED		transcript	taxon:13686	20060515	Uniprot
Uniprot	SiJWH08ABO.scf	SiJWH08ABO.scf		GO:0005739	SP:MCAT_HUMAN	IEA		C	NOT_ASSIGNED		transcript	taxon:13686	20060515	Uniprot
Uniprot	SiJWH08ABO.scf	SiJWH08ABO.scf		GO:0005488	SP:Q3SZA4_BOVIN	IEA		F	NOT_ASSIGNED		transcript	taxon:13686	20060515	Uniprot
Uniprot	SiJWH08ABO.scf	SiJWH08ABO.scf		GO:0016020	SP:Q3SZA4_BOVIN	IEA		C	NOT_ASSIGNED		transcript	taxon:13686	20060515	Uniprot
Uniprot	SiJWH08ABO.scf	SiJWH08ABO.scf		GO:0005743	SP:Q3SZA4_BOVIN	IEA		C	NOT_ASSIGNED		transcript	taxon:13686	20060515	Uniprot
Uniprot	SiJWH08ABO.scf	SiJWH08ABO.scf		GO:0005215	SP:Q3SZA4_BOVIN	IEA		F	NOT_ASSIGNED		transcript	taxon:13686	20060515	Uniprot
Uniprot	SiJWH08ABO.scf	SiJWH08ABO.scf		GO:0005319	SP:MCAT_HUMAN	IEA		F	NOT_ASSIGNED		transcript	taxon:13686	20060515	Uniprot
Uniprot	SiJWH08ABO.scf	SiJWH08ABO.scf		GO:0016021	SP:Q3SZA4_BOVIN	IEA		C	NOT_ASSIGNED		transcript	taxon:13686	20060515	Uniprot
Uniprot	SiJWH08ABO.scf	SiJWH08ABO.scf		GO:0006810	SP:Q3SZA4_BOVIN	IEA		P	NOT_ASSIGNED		transcript	taxon:13686	20060515	Uniprot
Uniprot	SI.CL.0.cl.065.SiJWD01ACH.scf	SI.CL.0.cl.065.SiJWD01ACH.scf		GO:0006260	SP:Q614P5_CAEBR	IEA		P	NOT_ASSIGNED		transcript	taxon:13686	20060515	Uniprot
Uniprot	SI.CL.0.cl.065.SiJWD01ACH.scf	SI.CL.0.cl.065.SiJWD01ACH.scf		GO:0000166	SP:Q614P5_CAEBR	IEA		F	NOT_ASSIGNED		transcript	taxon:13686	20060515	Uniprot
Uniprot	SI.CL.0.cl.065.SiJWD01ACH.scf	SI.CL.0.cl.065.SiJWD01ACH.scf		GO:0003677	SP:Q614P5_CAEBR	IEA		F	NOT_ASSIGNED		transcript	taxon:13686	20060515	Uniprot
Uniprot	SI.CL.0.cl.065.SiJWD01ACH.scf	SI.CL.0.cl.065.SiJWD01ACH.scf		GO:0008408	SP:Q614P5_CAEBR	IEA		F	NOT_ASSIGNED		transcript	taxon:13686	20060515	Uniprot
Uniprot	SI.CL.0.cl.065.SiJWD01ACH.scf	SI.CL.0.cl.065.SiJWD01ACH.scf		GO:0003887	SP:Q614P5_CAEBR	IEA		F	NOT_ASSIGNED		transcript	taxon:13686	20060515	Uniprot
Uniprot	SI.CL.42.cl.4241.Contig1	SI.CL.42.cl.4241.Contig1		GO:0004252	SP:Q5MPB5_MANSE	IEA		F	NOT_ASSIGNED		transcript	taxon:13686	20060515	Uniprot
Uniprot	SI.CL.42.cl.4241.Contig1	SI.CL.42.cl.4241.Contig1		GO:0006508	SP:Q5MPB5_MANSE	IEA		P	NOT_ASSIGNED		transcript	taxon:13686	20060515	Uniprot
Uniprot	SI.CL.11.cl.1136.SiJWC09ABI.scf	SI.CL.11.cl.1136.SiJWC09ABI.scf		GO:0005635	SP:CBX5_HUMAN	IEA		C	NOT_ASSIGNED		transcript	taxon:13686	20060515	Uniprot
Uniprot	SI.CL.11.cl.1136.SiJWC09ABI.scf	SI.CL.11.cl.1136.SiJWC09ABI.scf		GO:0005634	SP:Q52T68_BOVIN	IEA		C	NOT_ASSIGNED		transcript	taxon:13686	20060515	Uniprot
Uniprot	SI.CL.11.cl.1136.SiJWC09ABI.scf	SI.CL.11.cl.1136.SiJWC09ABI.scf		GO:0005720	SP:CBX5_HUMAN	IEA		C	NOT_ASSIGNED		transcript	taxon:13686	20060515	Uniprot
Uniprot	SI.CL.11.cl.1136.SiJWC09ABI.scf	SI.CL.11.cl.1136.SiJWC09ABI.scf		GO:0000785	SP:Q52T68_BOVIN	IEA		C	NOT_ASSIGNED		transcript	taxon:13686	20060515	Uniprot
Uniprot	SI.CL.11.cl.1136.SiJWC09ABI.scf	SI.CL.11.cl.1136.SiJWC09ABI.scf		GO:0005515	SP:CBX5_HUMAN	IEA		F	NOT_ASSIGNED		transcript	taxon:13686	20060515	Uniprot
Uniprot	SI.CL.11.cl.1136.SiJWC09ABI.scf	SI.CL.11.cl.1136.SiJWC09ABI.scf		GO:0006333	SP:Q52T68_BOVIN	IEA		P	NOT_ASSIGNED		transcript	taxon:13686	20060515	Uniprot
Uniprot	SI.CL.11.cl.1136.SiJWC09ABI.scf	SI.CL.11.cl.1136.SiJWC09ABI.scf		GO:0003682	SP:Q52T68_BOVIN	IEA		F	NOT_ASSIGNED		transcript	taxon:13686	20060515	Uniprot
Uniprot	SI.CL.17.cl.1766.Contig1	SI.CL.17.cl.1766.Contig1		GO:0005634	SP:MRT4_HUMAN	IEA		C	NOT_ASSIGNED		transcript	taxon:13686	20060515	Uniprot
Uniprot	SI.CL.17.cl.1766.Contig1	SI.CL.17.cl.1766.Contig1		GO:0042254	SP:Q4RX35_TETNG	IEA		P	NOT_ASSIGNED		transcript	taxon:13686	20060515	Uniprot
Uniprot	SI.CL.17.cl.1766.Contig1	SI.CL.17.cl.1766.Contig1		GO:0007046	SP:MRT4_HUMAN	IEA		P	NOT_ASSIGNED		transcript	taxon:13686	20060515	Uniprot
Uniprot	SI.CL.17.cl.1766.Contig1	SI.CL.17.cl.1766.Contig1		GO:0005622	SP:Q4RX35_TETNG	IEA		C	NOT_ASSIGNED		transcript	taxon:13686	20060515	Uniprot
Uniprot	SI.CL.35.cl.3544.Contig1	SI.CL.35.cl.3544.Contig1		GO:0000166	SP:Q5ZMU9_CHICK	IEA		F	NOT_ASSIGNED		transcript	taxon:13686	20060515	Uniprot
Uniprot	SI.CL.35.cl.3544.Contig1	SI.CL.35.cl.3544.Contig1		GO:0004252	SP:Q2V0H5_BOMMO	IEA		F	NOT_ASSIGNED		transcript	taxon:13686	20060515	Uniprot
Uniprot	SI.CL.35.cl.3544.Contig1	SI.CL.35.cl.3544.Contig1		GO:0005524	SP:Q5ZMU9_CHICK	IEA		F	NOT_ASSIGNED		transcript	taxon:13686	20060515	Uniprot
Uniprot	SI.CL.35.cl.3544.Contig1	SI.CL.35.cl.3544.Contig1		GO:0016787	SP:Q5ZMU9_CHICK	IEA		F	NOT_ASSIGNED		transcript	taxon:13686	20060515	Uniprot
Uniprot	SI.CL.35.cl.3544.Contig1	SI.CL.35.cl.3544.Contig1		GO:0004176	SP:Q2V0H5_BOMMO	IEA		F	NOT_ASSIGNED		transcript	taxon:13686	20060515	Uniprot
Uniprot	SI.CL.35.cl.3544.Contig1	SI.CL.35.cl.3544.Contig1		GO:0017111	SP:Q5ZMU9_CHICK	IEA		F	NOT_ASSIGNED		transcript	taxon:13686	20060515	Uniprot
Uniprot	SI.CL.35.cl.3544.Contig1	SI.CL.35.cl.3544.Contig1		GO:0006508	SP:Q2V0H5_BOMMO	IEA		P	NOT_ASSIGNED		transcript	taxon:13686	20060515	Uniprot
Uniprot	SiJWB11ACM.scf	SiJWB11ACM.scf		GO:0016192	SP:SC24B_HUMAN	IEA		P	NOT_ASSIGNED		transcript	taxon:13686	20060515	Uniprot
Uniprot	SiJWB11ACM.scf	SiJWB11ACM.scf		GO:0016020	SP:SC24B_HUMAN	IEA		C	NOT_ASSIGNED		transcript	taxon:13686	20060515	Uniprot
Uniprot	SiJWB11ACM.scf	SiJWB11ACM.scf		GO:0005795	SP:SC24B_HUMAN	IEA		C	NOT_ASSIGNED		transcript	taxon:13686	20060515	Uniprot
Uniprot	SiJWB11ACM.scf	SiJWB11ACM.scf		GO:0005215	SP:SC24B_HUMAN	IEA		F	NOT_ASSIGNED		transcript	taxon:13686	20060515	Uniprot
Uniprot	SiJWB11ACM.scf	SiJWB11ACM.scf		GO:0006888	SP:Q5ZM67_CHICK	IEA		P	NOT_ASSIGNED		transcript	taxon:13686	20060515	Uniprot
Uniprot	SiJWB11ACM.scf	SiJWB11ACM.scf		GO:0003779	SP:Q5ZM67_CHICK	IEA		F	NOT_ASSIGNED		transcript	taxon:13686	20060515	Uniprot
Uniprot	SiJWB11ACM.scf	SiJWB11ACM.scf		GO:0030127	SP:Q5ZM67_CHICK	IEA		C	NOT_ASSIGNED		transcript	taxon:13686	20060515	Uniprot
Uniprot	SiJWB11ACM.scf	SiJWB11ACM.scf		GO:0005783	SP:SC24B_HUMAN	IEA		C	NOT_ASSIGNED		transcript	taxon:13686	20060515	Uniprot
Uniprot	SiJWB11ACM.scf	SiJWB11ACM.scf		GO:0005515	SP:Q5ZM67_CHICK	IEA		F	NOT_ASSIGNED		transcript	taxon:13686	20060515	Uniprot
Uniprot	SiJWB11ACM.scf	SiJWB11ACM.scf		GO:0008270	SP:Q5ZM67_CHICK	IEA		F	NOT_ASSIGNED		transcript	taxon:13686	20060515	Uniprot
Uniprot	SiJWB11ACM.scf	SiJWB11ACM.scf		GO:0006886	SP:Q5ZM67_CHICK	IEA		P	NOT_ASSIGNED		transcript	taxon:13686	20060515	Uniprot
Uniprot	SiJWH11ADW.scf	SiJWH11ADW.scf		GO:0005634	SP:Q66VY4_CHICK	IEA		C	NOT_ASSIGNED		transcript	taxon:13686	20060515	Uniprot
Uniprot	SiJWH11ADW.scf	SiJWH11ADW.scf		GO:0046872	SP:SF3A2_HUMAN	IEA		F	NOT_ASSIGNED		transcript	taxon:13686	20060515	Uniprot
Uniprot	SiJWH11ADW.scf	SiJWH11ADW.scf		GO:0003676	SP:Q66VY4_CHICK	IEA		F	NOT_ASSIGNED		transcript	taxon:13686	20060515	Uniprot
Uniprot	SiJWH11ADW.scf	SiJWH11ADW.scf		GO:0008380	SP:SF3A2_HUMAN	IEA		P	NOT_ASSIGNED		transcript	taxon:13686	20060515	Uniprot
Uniprot	SiJWH11ADW.scf	SiJWH11ADW.scf		GO:0000389	SP:SF3A2_HUMAN	IEA		P	NOT_ASSIGNED		transcript	taxon:13686	20060515	Uniprot
Uniprot	SiJWH11ADW.scf	SiJWH11ADW.scf		GO:0005681	SP:SF3A2_HUMAN	IEA		C	NOT_ASSIGNED		transcript	taxon:13686	20060515	Uniprot
Uniprot	SiJWH11ADW.scf	SiJWH11ADW.scf		GO:0008270	SP:Q66VY4_CHICK	IEA		F	NOT_ASSIGNED		transcript	taxon:13686	20060515	Uniprot
Uniprot	SiJWH11ADW.scf	SiJWH11ADW.scf		GO:0000398	SP:SF3A2_HUMAN	IEA		P	NOT_ASSIGNED		transcript	taxon:13686	20060515	Uniprot
Uniprot	SiJWH11ADW.scf	SiJWH11ADW.scf		GO:0030532	SP:SF3A2_HUMAN	IEA		C	NOT_ASSIGNED		transcript	taxon:13686	20060515	Uniprot
Uniprot	SiJWG09ACX.scf	SiJWG09ACX.scf		GO:0000166	SP:Q4RZ24_TETNG	IEA		F	NOT_ASSIGNED		transcript	taxon:13686	20060515	Uniprot
Uniprot	SiJWG09ACX.scf	SiJWG09ACX.scf		GO:0046872	SP:Q4RZ24_TETNG	IEA		F	NOT_ASSIGNED		transcript	taxon:13686	20060515	Uniprot
Uniprot	SiJWG09ACX.scf	SiJWG09ACX.scf		GO:0003676	SP:Q4RZ24_TETNG	IEA		F	NOT_ASSIGNED		transcript	taxon:13686	20060515	Uniprot
Uniprot	SiJWG09ACX.scf	SiJWG09ACX.scf		GO:0008270	SP:Q4RZ24_TETNG	IEA		F	NOT_ASSIGNED		transcript	taxon:13686	20060515	Uniprot
Uniprot	SiJWB04AA1.tag5_B04_04.scf	SiJWB04AA1.tag5_B04_04.scf		GO:0000004	SP:Q9UL11_HUMAN	IEA		P	NOT_ASSIGNED		transcript	taxon:13686	20060515	Uniprot
Uniprot	SiJWB04AA1.tag5_B04_04.scf	SiJWB04AA1.tag5_B04_04.scf		GO:0005739	SP:SARDH_HUMAN	IEA		C	NOT_ASSIGNED		transcript	taxon:13686	20060515	Uniprot
Uniprot	SiJWB04AA1.tag5_B04_04.scf	SiJWB04AA1.tag5_B04_04.scf		GO:0006546	SP:SARDH_HUMAN	IEA		P	NOT_ASSIGNED		transcript	taxon:13686	20060515	Uniprot
Uniprot	SiJWB04AA1.tag5_B04_04.scf	SiJWB04AA1.tag5_B04_04.scf		GO:0008480	SP:O96023_HUMAN	IEA		F	NOT_ASSIGNED		transcript	taxon:13686	20060515	Uniprot
Uniprot	SiJWB04AA1.tag5_B04_04.scf	SiJWB04AA1.tag5_B04_04.scf		GO:0004047	SP:SARDH_HUMAN	IEA		F	NOT_ASSIGNED		transcript	taxon:13686	20060515	Uniprot
Uniprot	SiJWB04AA1.tag5_B04_04.scf	SiJWB04AA1.tag5_B04_04.scf		GO:0005759	SP:O96023_HUMAN	IEA		C	NOT_ASSIGNED		transcript	taxon:13686	20060515	Uniprot
Uniprot	SiJWB04AA1.tag5_B04_04.scf	SiJWB04AA1.tag5_B04_04.scf		GO:0016491	SP:O96023_HUMAN	IEA		F	NOT_ASSIGNED		transcript	taxon:13686	20060515	Uniprot
Uniprot	SiJWB04AA1.tag5_B04_04.scf	SiJWB04AA1.tag5_B04_04.scf		GO:0005737	SP:Q5RCY0_PONPY	IEA		C	NOT_ASSIGNED		transcript	taxon:13686	20060515	Uniprot
Uniprot	SiJWB04AA1.tag5_B04_04.scf	SiJWB04AA1.tag5_B04_04.scf		GO:0006118	SP:O96023_HUMAN	IEA		P	NOT_ASSIGNED		transcript	taxon:13686	20060515	Uniprot
Uniprot	SI.CL.22.cl.2235.Contig1	SI.CL.22.cl.2235.Contig1		GO:0005886	SP:ARF6_HUMAN	IEA		C	NOT_ASSIGNED		transcript	taxon:13686	20060515	Uniprot
Uniprot	SI.CL.22.cl.2235.Contig1	SI.CL.22.cl.2235.Contig1		GO:0001726	SP:ARF6_HUMAN	IEA		C	NOT_ASSIGNED		transcript	taxon:13686	20060515	Uniprot
Uniprot	SI.CL.22.cl.2235.Contig1	SI.CL.22.cl.2235.Contig1		GO:0016192	SP:ARF6_HUMAN	IEA		P	NOT_ASSIGNED		transcript	taxon:13686	20060515	Uniprot
Uniprot	SI.CL.22.cl.2235.Contig1	SI.CL.22.cl.2235.Contig1		GO:0005938	SP:ARF6_HUMAN	IEA		C	NOT_ASSIGNED		transcript	taxon:13686	20060515	Uniprot
Uniprot	SI.CL.22.cl.2235.Contig1	SI.CL.22.cl.2235.Contig1		GO:0005768	SP:ARF6_HUMAN	IEA		C	NOT_ASSIGNED		transcript	taxon:13686	20060515	Uniprot
Uniprot	SI.CL.22.cl.2235.Contig1	SI.CL.22.cl.2235.Contig1		GO:0031529	SP:ARF6_HUMAN	IEA		P	NOT_ASSIGNED		transcript	taxon:13686	20060515	Uniprot
Uniprot	SI.CL.22.cl.2235.Contig1	SI.CL.22.cl.2235.Contig1		GO:0005795	SP:ARF6_CHICK	IEA		C	NOT_ASSIGNED		transcript	taxon:13686	20060515	Uniprot
Uniprot	SI.CL.22.cl.2235.Contig1	SI.CL.22.cl.2235.Contig1		GO:0015031	SP:ARF6_CHICK	IEA		P	NOT_ASSIGNED		transcript	taxon:13686	20060515	Uniprot
Uniprot	SI.CL.22.cl.2235.Contig1	SI.CL.22.cl.2235.Contig1		GO:0006364	SP:ARF6_CHICK	IEA		P	NOT_ASSIGNED		transcript	taxon:13686	20060515	Uniprot
Uniprot	SI.CL.22.cl.2235.Contig1	SI.CL.22.cl.2235.Contig1		GO:0000166	SP:ARF6_CHICK	IEA		F	NOT_ASSIGNED		transcript	taxon:13686	20060515	Uniprot
Uniprot	SI.CL.22.cl.2235.Contig1	SI.CL.22.cl.2235.Contig1		GO:0005515	SP:ARF6_HUMAN	IEA		F	NOT_ASSIGNED		transcript	taxon:13686	20060515	Uniprot
Uniprot	SI.CL.22.cl.2235.Contig1	SI.CL.22.cl.2235.Contig1		GO:0005622	SP:ARF6_CHICK	IEA		C	NOT_ASSIGNED		transcript	taxon:13686	20060515	Uniprot
Uniprot	SI.CL.22.cl.2235.Contig1	SI.CL.22.cl.2235.Contig1		GO:0030866	SP:ARF6_HUMAN	IEA		P	NOT_ASSIGNED		transcript	taxon:13686	20060515	Uniprot
Uniprot	SI.CL.22.cl.2235.Contig1	SI.CL.22.cl.2235.Contig1		GO:0030838	SP:ARF6_HUMAN	IEA		P	NOT_ASSIGNED		transcript	taxon:13686	20060515	Uniprot
Uniprot	SI.CL.22.cl.2235.Contig1	SI.CL.22.cl.2235.Contig1		GO:0048261	SP:ARF6_HUMAN	IEA		P	NOT_ASSIGNED		transcript	taxon:13686	20060515	Uniprot
Uniprot	SI.CL.22.cl.2235.Contig1	SI.CL.22.cl.2235.Contig1		GO:0007046	SP:Q5EAX8_XENLA	IEA		P	NOT_ASSIGNED		transcript	taxon:13686	20060515	Uniprot
Uniprot	SI.CL.22.cl.2235.Contig1	SI.CL.22.cl.2235.Contig1		GO:0006888	SP:ARF6_CHICK	IEA		P	NOT_ASSIGNED		transcript	taxon:13686	20060515	Uniprot
Uniprot	SI.CL.22.cl.2235.Contig1	SI.CL.22.cl.2235.Contig1		GO:0005525	SP:ARF6_CHICK	IEA		F	NOT_ASSIGNED		transcript	taxon:13686	20060515	Uniprot
Uniprot	SI.CL.22.cl.2235.Contig1	SI.CL.22.cl.2235.Contig1		GO:0007264	SP:ARF6_CHICK	IEA		P	NOT_ASSIGNED		transcript	taxon:13686	20060515	Uniprot
Uniprot	SI.CL.22.cl.2235.Contig1	SI.CL.22.cl.2235.Contig1		GO:0035020	SP:ARF6_HUMAN	IEA		P	NOT_ASSIGNED		transcript	taxon:13686	20060515	Uniprot
Uniprot	SI.CL.22.cl.2235.Contig1	SI.CL.22.cl.2235.Contig1		GO:0007155	SP:ARF6_HUMAN	IEA		P	NOT_ASSIGNED		transcript	taxon:13686	20060515	Uniprot
Uniprot	SI.CL.22.cl.2235.Contig1	SI.CL.22.cl.2235.Contig1		GO:0006810	SP:Q5EAX8_XENLA	IEA		P	NOT_ASSIGNED		transcript	taxon:13686	20060515	Uniprot
Uniprot	SI.CL.22.cl.2235.Contig1	SI.CL.22.cl.2235.Contig1		GO:0006928	SP:ARF6_HUMAN	IEA		P	NOT_ASSIGNED		transcript	taxon:13686	20060515	Uniprot
Uniprot	SiJWH01BBH.scf	SiJWH01BBH.scf		GO:0007601	SP:Q9UNJ2_HUMAN	IEA		P	NOT_ASSIGNED		transcript	taxon:13686	20060515	Uniprot
Uniprot	SiJWH01BBH.scf	SiJWH01BBH.scf		GO:0003774	SP:Q9UNJ2_HUMAN	IEA		F	NOT_ASSIGNED		transcript	taxon:13686	20060515	Uniprot
Uniprot	SiJWH01BBH.scf	SiJWH01BBH.scf		GO:0005524	SP:Q9UNJ2_HUMAN	IEA		F	NOT_ASSIGNED		transcript	taxon:13686	20060515	Uniprot
Uniprot	SiJWH01BBH.scf	SiJWH01BBH.scf		GO:0007242	SP:Q9NTG2_HUMAN	IEA		P	NOT_ASSIGNED		transcript	taxon:13686	20060515	Uniprot
Uniprot	SiJWH01BBH.scf	SiJWH01BBH.scf		GO:0016459	SP:Q9UNJ2_HUMAN	IEA		C	NOT_ASSIGNED		transcript	taxon:13686	20060515	Uniprot
Uniprot	SiJWH01BBH.scf	SiJWH01BBH.scf		GO:0007165	SP:Q61XP6_CAEBR	IEA		P	NOT_ASSIGNED		transcript	taxon:13686	20060515	Uniprot
Uniprot	SI.CL.2.cl.271.Contig1	SI.CL.2.cl.271.Contig1		GO:0005783	SP:SSRB_BOVIN	IEA		C	NOT_ASSIGNED		transcript	taxon:13686	20060515	Uniprot
Uniprot	SI.CL.2.cl.271.Contig1	SI.CL.2.cl.271.Contig1		GO:0016020	SP:SSRB_BOVIN	IEA		C	NOT_ASSIGNED		transcript	taxon:13686	20060515	Uniprot
Uniprot	SI.CL.2.cl.271.Contig1	SI.CL.2.cl.271.Contig1		GO:0006613	SP:SSRB_HUMAN	IEA		P	NOT_ASSIGNED		transcript	taxon:13686	20060515	Uniprot
Uniprot	SI.CL.2.cl.271.Contig1	SI.CL.2.cl.271.Contig1		GO:0016021	SP:SSRB_BOVIN	IEA		C	NOT_ASSIGNED		transcript	taxon:13686	20060515	Uniprot
Uniprot	SI.CL.2.cl.271.Contig1	SI.CL.2.cl.271.Contig1		GO:0004872	SP:Q4PMC5_IXOSC	IEA		F	NOT_ASSIGNED		transcript	taxon:13686	20060515	Uniprot
Uniprot	SI.CL.2.cl.271.Contig1	SI.CL.2.cl.271.Contig1		GO:0005048	SP:SSRB_HUMAN	IEA		F	NOT_ASSIGNED		transcript	taxon:13686	20060515	Uniprot
Uniprot	SiJWH07ACH.scf	SiJWH07ACH.scf		GO:0003677	SP:Q380M7_ANOGA	IEA		F	NOT_ASSIGNED		transcript	taxon:13686	20060515	Uniprot
Uniprot	SiJWH07ACH.scf	SiJWH07ACH.scf		GO:0003676	SP:Q4JS97_ANOGA	IEA		F	NOT_ASSIGNED		transcript	taxon:13686	20060515	Uniprot
Uniprot	SiJWH07ACH.scf	SiJWH07ACH.scf		GO:0008270	SP:Q4JS97_ANOGA	IEA		F	NOT_ASSIGNED		transcript	taxon:13686	20060515	Uniprot
Uniprot	SiJWH07ACH.scf	SiJWH07ACH.scf		GO:0006508	SP:Q4JS97_ANOGA	IEA		P	NOT_ASSIGNED		transcript	taxon:13686	20060515	Uniprot
Uniprot	SiJWH07ACH.scf	SiJWH07ACH.scf		GO:0004190	SP:Q4JS97_ANOGA	IEA		F	NOT_ASSIGNED		transcript	taxon:13686	20060515	Uniprot
Uniprot	SiJWH07ACH.scf	SiJWH07ACH.scf		GO:0015074	SP:Q380M7_ANOGA	IEA		P	NOT_ASSIGNED		transcript	taxon:13686	20060515	Uniprot
Uniprot	SI.CL.32.cl.3213.SiJWC05BBZ.scf	SI.CL.32.cl.3213.SiJWC05BBZ.scf		GO:0016787	SP:Q2LZ18_DROPS	IEA		F	NOT_ASSIGNED		transcript	taxon:13686	20060515	Uniprot
Uniprot	SI.CL.32.cl.3213.SiJWC05BBZ.scf	SI.CL.32.cl.3213.SiJWC05BBZ.scf		GO:0008152	SP:Q2LZ18_DROPS	IEA		P	NOT_ASSIGNED		transcript	taxon:13686	20060515	Uniprot
Uniprot	SI.CL.32.cl.3213.SiJWC05BBZ.scf	SI.CL.32.cl.3213.SiJWC05BBZ.scf		GO:0016791	SP:Q2LZ18_DROPS	IEA		F	NOT_ASSIGNED		transcript	taxon:13686	20060515	Uniprot
Uniprot	SI.CL.32.cl.3213.SiJWC05BBZ.scf	SI.CL.32.cl.3213.SiJWC05BBZ.scf		GO:0003824	SP:Q2LZ18_DROPS	IEA		F	NOT_ASSIGNED		transcript	taxon:13686	20060515	Uniprot
Uniprot	SI.CL.17.cl.1793.Contig1	SI.CL.17.cl.1793.Contig1		GO:0005739	SP:BZRP_HUMAN	IEA		C	NOT_ASSIGNED		transcript	taxon:13686	20060515	Uniprot
Uniprot	SI.CL.17.cl.1793.Contig1	SI.CL.17.cl.1793.Contig1		GO:0008503	SP:BZRP_HUMAN	IEA		F	NOT_ASSIGNED		transcript	taxon:13686	20060515	Uniprot
Uniprot	SI.CL.17.cl.1793.Contig1	SI.CL.17.cl.1793.Contig1		GO:0006626	SP:BZRP_HUMAN	IEA		P	NOT_ASSIGNED		transcript	taxon:13686	20060515	Uniprot
Uniprot	SI.CL.17.cl.1793.Contig1	SI.CL.17.cl.1793.Contig1		GO:0016020	SP:BZRP_HUMAN	IEA		C	NOT_ASSIGNED		transcript	taxon:13686	20060515	Uniprot
Uniprot	SI.CL.17.cl.1793.Contig1	SI.CL.17.cl.1793.Contig1		GO:0016021	SP:BZRP_HUMAN	IEA		C	NOT_ASSIGNED		transcript	taxon:13686	20060515	Uniprot
Uniprot	SI.CL.17.cl.1793.Contig1	SI.CL.17.cl.1793.Contig1		GO:0005741	SP:BZRP_HUMAN	IEA		C	NOT_ASSIGNED		transcript	taxon:13686	20060515	Uniprot
Uniprot	SI.CL.17.cl.1793.Contig1	SI.CL.17.cl.1793.Contig1		GO:0004872	SP:BZRP_HUMAN	IEA		F	NOT_ASSIGNED		transcript	taxon:13686	20060515	Uniprot
Uniprot	SiJWD05CAW.scf	SiJWD05CAW.scf		GO:0005739	SP:TIM14_HUMAN	IEA		C	NOT_ASSIGNED		transcript	taxon:13686	20060515	Uniprot
Uniprot	SiJWD05CAW.scf	SiJWD05CAW.scf		GO:0016020	SP:TIM14_HUMAN	IEA		C	NOT_ASSIGNED		transcript	taxon:13686	20060515	Uniprot
Uniprot	SiJWD05CAW.scf	SiJWD05CAW.scf		GO:0015031	SP:TIM14_HUMAN	IEA		P	NOT_ASSIGNED		transcript	taxon:13686	20060515	Uniprot
Uniprot	SiJWD05CAW.scf	SiJWD05CAW.scf		GO:0006457	SP:TIM14_HUMAN	IEA		P	NOT_ASSIGNED		transcript	taxon:13686	20060515	Uniprot
Uniprot	SiJWD05CAW.scf	SiJWD05CAW.scf		GO:0016021	SP:TIM14_HUMAN	IEA		C	NOT_ASSIGNED		transcript	taxon:13686	20060515	Uniprot
Uniprot	SiJWD05CAW.scf	SiJWD05CAW.scf		GO:0031072	SP:TIM14_HUMAN	IEA		F	NOT_ASSIGNED		transcript	taxon:13686	20060515	Uniprot
Uniprot	SiJWD05CAW.scf	SiJWD05CAW.scf		GO:0006605	SP:TIM14_HUMAN	IEA		P	NOT_ASSIGNED		transcript	taxon:13686	20060515	Uniprot
Uniprot	SiJWD05CAW.scf	SiJWD05CAW.scf		GO:0005554	SP:TIM14_HUMAN	IEA		F	NOT_ASSIGNED		transcript	taxon:13686	20060515	Uniprot
Uniprot	SiJWD05CAW.scf	SiJWD05CAW.scf		GO:0051082	SP:TIM14_HUMAN	IEA		F	NOT_ASSIGNED		transcript	taxon:13686	20060515	Uniprot
Uniprot	SiJWD05CAW.scf	SiJWD05CAW.scf		GO:0006810	SP:TIM14_PONPY	IEA		P	NOT_ASSIGNED		transcript	taxon:13686	20060515	Uniprot
Uniprot	SI.CL.0.cl.031.Contig1	SI.CL.0.cl.031.Contig1		GO:0003714	SP:CREG1_HUMAN	IEA		F	NOT_ASSIGNED		transcript	taxon:13686	20060515	Uniprot
Uniprot	SI.CL.0.cl.031.Contig1	SI.CL.0.cl.031.Contig1		GO:0008283	SP:CREG1_HUMAN	IEA		P	NOT_ASSIGNED		transcript	taxon:13686	20060515	Uniprot
Uniprot	SI.CL.0.cl.031.Contig1	SI.CL.0.cl.031.Contig1		GO:0001558	SP:CREG1_HUMAN	IEA		P	NOT_ASSIGNED		transcript	taxon:13686	20060515	Uniprot
Uniprot	SI.CL.0.cl.031.Contig1	SI.CL.0.cl.031.Contig1		GO:0007275	SP:CREG1_HUMAN	IEA		P	NOT_ASSIGNED		transcript	taxon:13686	20060515	Uniprot
Uniprot	SI.CL.0.cl.031.Contig1	SI.CL.0.cl.031.Contig1		GO:0006357	SP:CREG1_HUMAN	IEA		P	NOT_ASSIGNED		transcript	taxon:13686	20060515	Uniprot
Uniprot	SI.CL.0.cl.031.Contig1	SI.CL.0.cl.031.Contig1		GO:0003702	SP:CREG1_HUMAN	IEA		F	NOT_ASSIGNED		transcript	taxon:13686	20060515	Uniprot
Uniprot	SI.CL.23.cl.2335.Contig1	SI.CL.23.cl.2335.Contig1		GO:0000166	SP:O15042_HUMAN	IEA		F	NOT_ASSIGNED		transcript	taxon:13686	20060515	Uniprot
Uniprot	SI.CL.23.cl.2335.Contig1	SI.CL.23.cl.2335.Contig1		GO:0006396	SP:O15042_HUMAN	IEA		P	NOT_ASSIGNED		transcript	taxon:13686	20060515	Uniprot
Uniprot	SI.CL.23.cl.2335.Contig1	SI.CL.23.cl.2335.Contig1		GO:0003676	SP:Q5R7X2_PONPY	IEA		F	NOT_ASSIGNED		transcript	taxon:13686	20060515	Uniprot
Uniprot	SI.CL.23.cl.2335.Contig1	SI.CL.23.cl.2335.Contig1		GO:0003723	SP:O15042_HUMAN	IEA		F	NOT_ASSIGNED		transcript	taxon:13686	20060515	Uniprot
Uniprot	SI.CL.21.cl.2160.Contig1	SI.CL.21.cl.2160.Contig1		GO:0005737	SP:PDCL3_HUMAN	IEA		C	NOT_ASSIGNED		transcript	taxon:13686	20060515	Uniprot
Uniprot	SI.CL.21.cl.2160.Contig1	SI.CL.21.cl.2160.Contig1		GO:0005515	SP:PDCL3_HUMAN	IEA		F	NOT_ASSIGNED		transcript	taxon:13686	20060515	Uniprot
Uniprot	SI.CL.21.cl.2160.Contig1	SI.CL.21.cl.2160.Contig1		GO:0006915	SP:PDCL3_HUMAN	IEA		P	NOT_ASSIGNED		transcript	taxon:13686	20060515	Uniprot
Uniprot	SI.CL.21.cl.2160.Contig1	SI.CL.21.cl.2160.Contig1		GO:0006118	SP:Q7PGA7_ANOGA	IEA		P	NOT_ASSIGNED		transcript	taxon:13686	20060515	Uniprot
Uniprot	SI.CL.27.cl.2779.Contig1	SI.CL.27.cl.2779.Contig1		GO:0004252	SP:Q17039_ANOGA	IEA		F	NOT_ASSIGNED		transcript	taxon:13686	20060515	Uniprot
Uniprot	SI.CL.27.cl.2779.Contig1	SI.CL.27.cl.2779.Contig1		GO:0008243	SP:Q9BZW1_HUMAN	IEA		F	NOT_ASSIGNED		transcript	taxon:13686	20060515	Uniprot
Uniprot	SI.CL.27.cl.2779.Contig1	SI.CL.27.cl.2779.Contig1		GO:0016787	SP:Q7Q432_ANOGA	IEA		F	NOT_ASSIGNED		transcript	taxon:13686	20060515	Uniprot
Uniprot	SI.CL.27.cl.2779.Contig1	SI.CL.27.cl.2779.Contig1		GO:0008233	SP:Q7Q432_ANOGA	IEA		F	NOT_ASSIGNED		transcript	taxon:13686	20060515	Uniprot
Uniprot	SI.CL.27.cl.2779.Contig1	SI.CL.27.cl.2779.Contig1		GO:0006508	SP:Q9BZW1_HUMAN	IEA		P	NOT_ASSIGNED		transcript	taxon:13686	20060515	Uniprot
Uniprot	SI.CL.27.cl.2779.Contig1	SI.CL.27.cl.2779.Contig1		GO:0005576	SP:Q9BZW1_HUMAN	IEA		C	NOT_ASSIGNED		transcript	taxon:13686	20060515	Uniprot
Uniprot	SI.CL.40.cl.4047.Contig1	SI.CL.40.cl.4047.Contig1		GO:0006814	SP:O57661_XENLA	IEA		P	NOT_ASSIGNED		transcript	taxon:13686	20060515	Uniprot
Uniprot	SI.CL.40.cl.4047.Contig1	SI.CL.40.cl.4047.Contig1		GO:0015293	SP:S13A3_HUMAN	IEA		F	NOT_ASSIGNED		transcript	taxon:13686	20060515	Uniprot
Uniprot	SI.CL.40.cl.4047.Contig1	SI.CL.40.cl.4047.Contig1		GO:0016020	SP:O57661_XENLA	IEA		C	NOT_ASSIGNED		transcript	taxon:13686	20060515	Uniprot
Uniprot	SI.CL.40.cl.4047.Contig1	SI.CL.40.cl.4047.Contig1		GO:0005215	SP:O57661_XENLA	IEA		F	NOT_ASSIGNED		transcript	taxon:13686	20060515	Uniprot
Uniprot	SI.CL.40.cl.4047.Contig1	SI.CL.40.cl.4047.Contig1		GO:0016021	SP:S13A3_HUMAN	IEA		C	NOT_ASSIGNED		transcript	taxon:13686	20060515	Uniprot
Uniprot	SI.CL.40.cl.4047.Contig1	SI.CL.40.cl.4047.Contig1		GO:0006811	SP:S13A3_HUMAN	IEA		P	NOT_ASSIGNED		transcript	taxon:13686	20060515	Uniprot
Uniprot	SI.CL.40.cl.4047.Contig1	SI.CL.40.cl.4047.Contig1		GO:0031402	SP:S13A3_HUMAN	IEA		F	NOT_ASSIGNED		transcript	taxon:13686	20060515	Uniprot
Uniprot	SiJWA10ADA.scf	SiJWA10ADA.scf		GO:0007186	SP:Q4RXN8_TETNG	IEA		P	NOT_ASSIGNED		transcript	taxon:13686	20060515	Uniprot
Uniprot	SiJWA10ADA.scf	SiJWA10ADA.scf		GO:0001584	SP:Q4RXN8_TETNG	IEA		F	NOT_ASSIGNED		transcript	taxon:13686	20060515	Uniprot
Uniprot	SiJWA10ADA.scf	SiJWA10ADA.scf		GO:0007049	SP:NBL1_HUMAN	IEA		P	NOT_ASSIGNED		transcript	taxon:13686	20060515	Uniprot
Uniprot	SiJWA10ADA.scf	SiJWA10ADA.scf		GO:0005515	SP:NBL1_HUMAN	IEA		F	NOT_ASSIGNED		transcript	taxon:13686	20060515	Uniprot
Uniprot	SiJWA10ADA.scf	SiJWA10ADA.scf		GO:0016021	SP:Q4RXN8_TETNG	IEA		C	NOT_ASSIGNED		transcript	taxon:13686	20060515	Uniprot
Uniprot	SiJWA10ADA.scf	SiJWA10ADA.scf		GO:0045786	SP:NBL1_HUMAN	IEA		P	NOT_ASSIGNED		transcript	taxon:13686	20060515	Uniprot
Uniprot	SI.CL.9.cl.992.Contig2	SI.CL.9.cl.992.Contig2		GO:0008233	SP:Q4SHI1_TETNG	IEA		F	NOT_ASSIGNED		transcript	taxon:13686	20060515	Uniprot
Uniprot	SI.CL.9.cl.992.Contig2	SI.CL.9.cl.992.Contig2		GO:0006511	SP:Q3ZCK9_BOVIN	IEA		P	NOT_ASSIGNED		transcript	taxon:13686	20060515	Uniprot
Uniprot	SI.CL.9.cl.992.Contig2	SI.CL.9.cl.992.Contig2		GO:0043234	SP:Q3ZCK9_BOVIN	IEA		C	NOT_ASSIGNED		transcript	taxon:13686	20060515	Uniprot
Uniprot	SI.CL.9.cl.992.Contig2	SI.CL.9.cl.992.Contig2		GO:0004175	SP:Q3KPN6_XENLA	IEA		F	NOT_ASSIGNED		transcript	taxon:13686	20060515	Uniprot
Uniprot	SI.CL.9.cl.992.Contig2	SI.CL.9.cl.992.Contig2		GO:0004298	SP:Q3ZCK9_BOVIN	IEA		F	NOT_ASSIGNED		transcript	taxon:13686	20060515	Uniprot
Uniprot	SI.CL.9.cl.992.Contig2	SI.CL.9.cl.992.Contig2		GO:0005839	SP:Q3ZCK9_BOVIN	IEA		C	NOT_ASSIGNED		transcript	taxon:13686	20060515	Uniprot
Uniprot	SI.CL.9.cl.992.Contig2	SI.CL.9.cl.992.Contig2		GO:0000166	SP:Q4SHI1_TETNG	IEA		F	NOT_ASSIGNED		transcript	taxon:13686	20060515	Uniprot
Uniprot	SI.CL.9.cl.992.Contig2	SI.CL.9.cl.992.Contig2		GO:0016787	SP:Q4SHI1_TETNG	IEA		F	NOT_ASSIGNED		transcript	taxon:13686	20060515	Uniprot
Uniprot	SI.CL.9.cl.992.Contig2	SI.CL.9.cl.992.Contig2		GO:0005829	SP:Q3ZCK9_BOVIN	IEA		C	NOT_ASSIGNED		transcript	taxon:13686	20060515	Uniprot
Uniprot	SI.CL.14.cl.1487.Contig1	SI.CL.14.cl.1487.Contig1		GO:0046872	SP:AMPN_MANSE	IEA		F	NOT_ASSIGNED		transcript	taxon:13686	20060515	Uniprot
Uniprot	SI.CL.14.cl.1487.Contig1	SI.CL.14.cl.1487.Contig1		GO:0016020	SP:AMPN_MANSE	IEA		C	NOT_ASSIGNED		transcript	taxon:13686	20060515	Uniprot
Uniprot	SI.CL.14.cl.1487.Contig1	SI.CL.14.cl.1487.Contig1		GO:0030154	SP:AMPN_FELCA	IEA		P	NOT_ASSIGNED		transcript	taxon:13686	20060515	Uniprot
Uniprot	SI.CL.14.cl.1487.Contig1	SI.CL.14.cl.1487.Contig1		GO:0008233	SP:AMPN_MANSE	IEA		F	NOT_ASSIGNED		transcript	taxon:13686	20060515	Uniprot
Uniprot	SI.CL.14.cl.1487.Contig1	SI.CL.14.cl.1487.Contig1		GO:0016021	SP:AMPN_FELCA	IEA		C	NOT_ASSIGNED		transcript	taxon:13686	20060515	Uniprot
Uniprot	SI.CL.14.cl.1487.Contig1	SI.CL.14.cl.1487.Contig1		GO:0008237	SP:AMPN_MANSE	IEA		F	NOT_ASSIGNED		transcript	taxon:13686	20060515	Uniprot
Uniprot	SI.CL.14.cl.1487.Contig1	SI.CL.14.cl.1487.Contig1		GO:0004177	SP:AMPN_MANSE	IEA		F	NOT_ASSIGNED		transcript	taxon:13686	20060515	Uniprot
Uniprot	SI.CL.14.cl.1487.Contig1	SI.CL.14.cl.1487.Contig1		GO:0004179	SP:AMPN_MANSE	IEA		F	NOT_ASSIGNED		transcript	taxon:13686	20060515	Uniprot
Uniprot	SI.CL.14.cl.1487.Contig1	SI.CL.14.cl.1487.Contig1		GO:0016787	SP:AMPN_MANSE	IEA		F	NOT_ASSIGNED		transcript	taxon:13686	20060515	Uniprot
Uniprot	SI.CL.14.cl.1487.Contig1	SI.CL.14.cl.1487.Contig1		GO:0007275	SP:AMPN_FELCA	IEA		P	NOT_ASSIGNED		transcript	taxon:13686	20060515	Uniprot
Uniprot	SI.CL.14.cl.1487.Contig1	SI.CL.14.cl.1487.Contig1		GO:0008270	SP:AMPN_MANSE	IEA		F	NOT_ASSIGNED		transcript	taxon:13686	20060515	Uniprot
Uniprot	SI.CL.14.cl.1487.Contig1	SI.CL.14.cl.1487.Contig1		GO:0006508	SP:AMPN_MANSE	IEA		P	NOT_ASSIGNED		transcript	taxon:13686	20060515	Uniprot
Uniprot	SI.CL.14.cl.1487.Contig1	SI.CL.14.cl.1487.Contig1		GO:0001525	SP:AMPN_FELCA	IEA		P	NOT_ASSIGNED		transcript	taxon:13686	20060515	Uniprot
Uniprot	SI.CL.43.cl.4340.Contig1	SI.CL.43.cl.4340.Contig1		GO:0005634	SP:PCQAP_HUMAN	IEA		C	NOT_ASSIGNED		transcript	taxon:13686	20060515	Uniprot
Uniprot	SI.CL.43.cl.4340.Contig1	SI.CL.43.cl.4340.Contig1		GO:0006350	SP:PCQAP_HUMAN	IEA		P	NOT_ASSIGNED		transcript	taxon:13686	20060515	Uniprot
Uniprot	SI.CL.43.cl.4340.Contig1	SI.CL.43.cl.4340.Contig1		GO:0006355	SP:PCQAP_HUMAN	IEA		P	NOT_ASSIGNED		transcript	taxon:13686	20060515	Uniprot
Uniprot	SI.CL.42.cl.4233.Contig1	SI.CL.42.cl.4233.Contig1		GO:0004252	SP:O15944_SARPE	IEA		F	NOT_ASSIGNED		transcript	taxon:13686	20060515	Uniprot
Uniprot	SI.CL.42.cl.4233.Contig1	SI.CL.42.cl.4233.Contig1		GO:0016787	SP:O15944_SARPE	IEA		F	NOT_ASSIGNED		transcript	taxon:13686	20060515	Uniprot
Uniprot	SI.CL.42.cl.4233.Contig1	SI.CL.42.cl.4233.Contig1		GO:0008233	SP:O15944_SARPE	IEA		F	NOT_ASSIGNED		transcript	taxon:13686	20060515	Uniprot
Uniprot	SI.CL.42.cl.4233.Contig1	SI.CL.42.cl.4233.Contig1		GO:0006508	SP:O15944_SARPE	IEA		P	NOT_ASSIGNED		transcript	taxon:13686	20060515	Uniprot
Uniprot	SI.CL.17.cl.1752.Contig1	SI.CL.17.cl.1752.Contig1		GO:0006412	SP:SYQ_HUMAN	IEA		P	NOT_ASSIGNED		transcript	taxon:13686	20060515	Uniprot
Uniprot	SI.CL.17.cl.1752.Contig1	SI.CL.17.cl.1752.Contig1		GO:0006425	SP:SYQ_HUMAN	IEA		P	NOT_ASSIGNED		transcript	taxon:13686	20060515	Uniprot
Uniprot	SI.CL.17.cl.1752.Contig1	SI.CL.17.cl.1752.Contig1		GO:0004819	SP:Q5F3C0_CHICK	IEA		F	NOT_ASSIGNED		transcript	taxon:13686	20060515	Uniprot
Uniprot	SI.CL.17.cl.1752.Contig1	SI.CL.17.cl.1752.Contig1		GO:0004818	SP:Q5F3C0_CHICK	IEA		F	NOT_ASSIGNED		transcript	taxon:13686	20060515	Uniprot
Uniprot	SI.CL.17.cl.1752.Contig1	SI.CL.17.cl.1752.Contig1		GO:0005625	SP:SYQ_HUMAN	IEA		C	NOT_ASSIGNED		transcript	taxon:13686	20060515	Uniprot
[truncated: 16,135 more rows]
