# Supplementary material for: An annotated cDNA library and microarray for large-scale gene-expression studies in the ant Solenopsis invicta
Source: Genome Biol. 2007 Jan 15;8(1):R9. doi: 10.1186/gb-2007-8-1-r9 (PMC1839134; doi:10.1186/gb-2007-8-1-r9)
Supplement: Additional data file 4 — GO annotations for all assembled transcripts based on Prosite searches [file gb-2007-8-1-r9-S4.xls]

## Sheet: Sup_Table_C.txt
Additional data file 4: GO annotation of the assembled fire ant sequences based on Prosite searches
This spreadsheet is in a standard GO annotation file format. The DB_Object_IDs correspond to the fire ant assembled sequence IDs
DB	DB_Object_ID	DB_Object_Symbol	Qualifier	GO ID	DB:Reference (|DB:Reference)	Evidence	With (or) From	Aspect	DB_Object_Name	DB_Object_Synonym (|Synonym)	DB_Object_Type	taxon(|taxon)	Date	Assigned_by
Prosite	SiJWA12ACF.scf	SiJWA12ACF.scf		GO:0004252	Prosite:PS00134|Prosite:PDOC00124	IEA		P	Serine proteases, trypsin family, histidine active site		transcript	taxon:13686	20060427	Prosite
Prosite	SiJWA12ACF.scf	SiJWA12ACF.scf		GO:0006508	Prosite:PS00134|Prosite:PDOC00124	IEA		P	Serine proteases, trypsin family, histidine active site		transcript	taxon:13686	20060427	Prosite
Prosite	SiJWA04ACG.scf	SiJWA04ACG.scf		GO:0005509	Prosite:PS00018|Prosite:PDOC00018	IEA		P	EF-hand calcium-binding domain		transcript	taxon:13686	20060427	Prosite
Prosite	SiJWA07ACG.scf	SiJWA07ACG.scf		GO:0005489	Prosite:PS00195|Prosite:PDOC00173	IEA		P	Glutaredoxin active site		transcript	taxon:13686	20060427	Prosite
Prosite	SiJWA07ACG.scf	SiJWA07ACG.scf		GO:0006118	Prosite:PS00195|Prosite:PDOC00173	IEA		P	Glutaredoxin active site		transcript	taxon:13686	20060427	Prosite
Prosite	SiJWA07ACG.scf	SiJWA07ACG.scf		GO:0045454	Prosite:PS00195|Prosite:PDOC00173	IEA		P	Glutaredoxin active site		transcript	taxon:13686	20060427	Prosite
Prosite	SiJWG03ACG.scf	SiJWG03ACG.scf		GO:0005198	Prosite:PS00227|Prosite:PDOC00199	IEA		P	Tubulin subunits alpha, beta, and gamma signature		transcript	taxon:13686	20060427	Prosite
Prosite	SiJWG03ACG.scf	SiJWG03ACG.scf		GO:0007018	Prosite:PS00227|Prosite:PDOC00199	IEA		P	Tubulin subunits alpha, beta, and gamma signature		transcript	taxon:13686	20060427	Prosite
Prosite	SiJWG03ACG.scf	SiJWG03ACG.scf		GO:0005874	Prosite:PS00227|Prosite:PDOC00199	IEA		P	Tubulin subunits alpha, beta, and gamma signature		transcript	taxon:13686	20060427	Prosite
Prosite	SiJWG08AAN.scf	SiJWG08AAN.scf		GO:0004713	Prosite:PS00109|Prosite:PDOC00100	IEA		P	Tyrosine protein kinases specific active-site signature		transcript	taxon:13686	20060427	Prosite
Prosite	SiJWG08AAN.scf	SiJWG08AAN.scf		GO:0005524	Prosite:PS00109|Prosite:PDOC00100	IEA		P	Tyrosine protein kinases specific active-site signature		transcript	taxon:13686	20060427	Prosite
Prosite	SiJWG08AAN.scf	SiJWG08AAN.scf		GO:0006468	Prosite:PS00109|Prosite:PDOC00100	IEA		P	Tyrosine protein kinases specific active-site signature		transcript	taxon:13686	20060427	Prosite
Prosite	SiJWC07AAN.scf	SiJWC07AAN.scf		GO:0008237	Prosite:PS00142|Prosite:PDOC00129	IEA		P	Neutral zinc metallopeptidases, zinc-binding region signature		transcript	taxon:13686	20060427	Prosite
Prosite	SiJWC07AAN.scf	SiJWC07AAN.scf		GO:0008270	Prosite:PS00142|Prosite:PDOC00129	IEA		P	Neutral zinc metallopeptidases, zinc-binding region signature		transcript	taxon:13686	20060427	Prosite
Prosite	SiJWC07AAN.scf	SiJWC07AAN.scf		GO:0006508	Prosite:PS00142|Prosite:PDOC00129	IEA		P	Neutral zinc metallopeptidases, zinc-binding region signature		transcript	taxon:13686	20060427	Prosite
Prosite	SiJWF11ACI.scf	SiJWF11ACI.scf		GO:0004146	Prosite:PS00075|Prosite:PDOC00072	IEA		P	Dihydrofolate reductase signature		transcript	taxon:13686	20060427	Prosite
Prosite	SiJWF11ACI.scf	SiJWF11ACI.scf		GO:0006545	Prosite:PS00075|Prosite:PDOC00072	IEA		P	Dihydrofolate reductase signature		transcript	taxon:13686	20060427	Prosite
Prosite	SiJWF11ACI.scf	SiJWF11ACI.scf		GO:0009165	Prosite:PS00075|Prosite:PDOC00072	IEA		P	Dihydrofolate reductase signature		transcript	taxon:13686	20060427	Prosite
Prosite	SiJWC02ACK.scf	SiJWC02ACK.scf		GO:0004197	Prosite:PS00639|Prosite:PDOC00126	IEA		P	Eukaryotic thiol (cysteine) proteases histidine active site		transcript	taxon:13686	20060427	Prosite
Prosite	SiJWC02ACK.scf	SiJWC02ACK.scf		GO:0006508	Prosite:PS00639|Prosite:PDOC00126	IEA		P	Eukaryotic thiol (cysteine) proteases histidine active site		transcript	taxon:13686	20060427	Prosite
Prosite	SiJWE11ACA.scf	SiJWE11ACA.scf		GO:0004497	Prosite:PS00086|Prosite:PDOC00081	IEA		P	Cytochrome P450 cysteine heme-iron ligand signature		transcript	taxon:13686	20060427	Prosite
Prosite	SiJWE11ACA.scf	SiJWE11ACA.scf		GO:0005506	Prosite:PS00086|Prosite:PDOC00081	IEA		P	Cytochrome P450 cysteine heme-iron ligand signature		transcript	taxon:13686	20060427	Prosite
Prosite	SiJWE11ACA.scf	SiJWE11ACA.scf		GO:0020037	Prosite:PS00086|Prosite:PDOC00081	IEA		P	Cytochrome P450 cysteine heme-iron ligand signature		transcript	taxon:13686	20060427	Prosite
Prosite	SiJWE11ACA.scf	SiJWE11ACA.scf		GO:0006118	Prosite:PS00086|Prosite:PDOC00081	IEA		P	Cytochrome P450 cysteine heme-iron ligand signature		transcript	taxon:13686	20060427	Prosite
Prosite	SiJWF03AAK.scf	SiJWF03AAK.scf		GO:0004497	Prosite:PS00086|Prosite:PDOC00081	IEA		P	Cytochrome P450 cysteine heme-iron ligand signature		transcript	taxon:13686	20060427	Prosite
Prosite	SiJWF03AAK.scf	SiJWF03AAK.scf		GO:0005506	Prosite:PS00086|Prosite:PDOC00081	IEA		P	Cytochrome P450 cysteine heme-iron ligand signature		transcript	taxon:13686	20060427	Prosite
Prosite	SiJWF03AAK.scf	SiJWF03AAK.scf		GO:0020037	Prosite:PS00086|Prosite:PDOC00081	IEA		P	Cytochrome P450 cysteine heme-iron ligand signature		transcript	taxon:13686	20060427	Prosite
Prosite	SiJWF03AAK.scf	SiJWF03AAK.scf		GO:0006118	Prosite:PS00086|Prosite:PDOC00081	IEA		P	Cytochrome P450 cysteine heme-iron ligand signature		transcript	taxon:13686	20060427	Prosite
Prosite	SiJWE12ABF.scf	SiJWE12ABF.scf		GO:0005515	Prosite:PS01132|Prosite:PDOC00340	IEA		P	Actins and actin-related proteins signature		transcript	taxon:13686	20060427	Prosite
Prosite	SiJWB03ACL.scf	SiJWB03ACL.scf		GO:0005509	Prosite:PS00232|Prosite:PDOC00205	IEA		P	Cadherin domain signature		transcript	taxon:13686	20060427	Prosite
Prosite	SiJWB03ACL.scf	SiJWB03ACL.scf		GO:0007156	Prosite:PS00232|Prosite:PDOC00205	IEA		P	Cadherin domain signature		transcript	taxon:13686	20060427	Prosite
Prosite	SiJWB03ACL.scf	SiJWB03ACL.scf		GO:0016020	Prosite:PS00232|Prosite:PDOC00205	IEA		P	Cadherin domain signature		transcript	taxon:13686	20060427	Prosite
Prosite	SiJWB03ACS.scf	SiJWB03ACS.scf		GO:0004252	Prosite:PS00134|Prosite:PDOC00124	IEA		P	Serine proteases, trypsin family, histidine active site		transcript	taxon:13686	20060427	Prosite
Prosite	SiJWB03ACS.scf	SiJWB03ACS.scf		GO:0006508	Prosite:PS00134|Prosite:PDOC00124	IEA		P	Serine proteases, trypsin family, histidine active site		transcript	taxon:13686	20060427	Prosite
Prosite	SiJWC10ACU.scf	SiJWC10ACU.scf		GO:0003676	Prosite:PS00028|Prosite:PDOC00028	IEA		P	Zinc finger C2H2 type domain signature		transcript	taxon:13686	20060427	Prosite
Prosite	SiJWC10ACU.scf	SiJWC10ACU.scf		GO:0008270	Prosite:PS00028|Prosite:PDOC00028	IEA		P	Zinc finger C2H2 type domain signature		transcript	taxon:13686	20060427	Prosite
Prosite	SiJWC10ACU.scf	SiJWC10ACU.scf		GO:0005634	Prosite:PS00028|Prosite:PDOC00028	IEA		P	Zinc finger C2H2 type domain signature		transcript	taxon:13686	20060427	Prosite
Prosite	SiJWH09ACW.scf	SiJWH09ACW.scf		GO:0003743	Prosite:PS00302|Prosite:PDOC00274	IEA		P	Eukaryotic initiation factor 5A hypusine signature		transcript	taxon:13686	20060427	Prosite
Prosite	SiJWH09ACW.scf	SiJWH09ACW.scf		GO:0006413	Prosite:PS00302|Prosite:PDOC00274	IEA		P	Eukaryotic initiation factor 5A hypusine signature		transcript	taxon:13686	20060427	Prosite
Prosite	SiJWG08AAQ.scf	SiJWG08AAQ.scf		GO:0003995	Prosite:PS00073|Prosite:PDOC00070	IEA		P	Acyl-CoA dehydrogenases signature 2		transcript	taxon:13686	20060427	Prosite
Prosite	SiJWG08AAQ.scf	SiJWG08AAQ.scf		GO:0006118	Prosite:PS00073|Prosite:PDOC00070	IEA		P	Acyl-CoA dehydrogenases signature 2		transcript	taxon:13686	20060427	Prosite
Prosite	SiJWG03ABA.scf	SiJWG03ABA.scf		GO:0006520	Prosite:PS00868|Prosite:PDOC00677	IEA		P	Cys/Met metabolism enzymes pyridoxal-phosphate attachment site		transcript	taxon:13686	20060427	Prosite
Prosite	SiJWH11ABY.scf	SiJWH11ABY.scf		GO:0031072	Prosite:PS00636|Prosite:PDOC00553	IEA		P	Nt-dnaJ domain signature		transcript	taxon:13686	20060427	Prosite
Prosite	SiJWD02ABS.scf	SiJWD02ABS.scf		GO:0003824	Prosite:PS00120|Prosite:PDOC00110	IEA		P	Lipases, serine active site		transcript	taxon:13686	20060427	Prosite
Prosite	SiJWA02AAP.scf	SiJWA02AAP.scf		GO:0016021	Prosite:PS00421|Prosite:PDOC00371	IEA		P	Transmembrane 4 family signature		transcript	taxon:13686	20060427	Prosite
Prosite	SiJWD11AAT.scf	SiJWD11AAT.scf		GO:0003824	Prosite:PS00455|Prosite:PDOC00427	IEA		P	Putative AMP-binding domain signature		transcript	taxon:13686	20060427	Prosite
Prosite	SiJWD11AAT.scf	SiJWD11AAT.scf		GO:0008152	Prosite:PS00455|Prosite:PDOC00427	IEA		P	Putative AMP-binding domain signature		transcript	taxon:13686	20060427	Prosite
Prosite	SiJWG04ABQ.scf	SiJWG04ABQ.scf		GO:0005576	Prosite:PS01009|Prosite:PDOC00772	IEA		P	CRISP family signature 1		transcript	taxon:13686	20060427	Prosite
Prosite	SiJWG04ABQ.scf	SiJWG04ABQ.scf		GO:0005576	Prosite:PS01010|Prosite:PDOC00772	IEA		P	CRISP family signature 2		transcript	taxon:13686	20060427	Prosite
Prosite	SiJWH03ABQ.scf	SiJWH03ABQ.scf		GO:0005525	Prosite:PS01019|Prosite:PDOC00781	IEA		P	ADP-ribosylation factors family signature		transcript	taxon:13686	20060427	Prosite
Prosite	SiJWH03ABQ.scf	SiJWH03ABQ.scf		GO:0006364	Prosite:PS01019|Prosite:PDOC00781	IEA		P	ADP-ribosylation factors family signature		transcript	taxon:13686	20060427	Prosite
Prosite	SiJWH03ABQ.scf	SiJWH03ABQ.scf		GO:0007046	Prosite:PS01019|Prosite:PDOC00781	IEA		P	ADP-ribosylation factors family signature		transcript	taxon:13686	20060427	Prosite
Prosite	SiJWH03ABQ.scf	SiJWH03ABQ.scf		GO:0007264	Prosite:PS01019|Prosite:PDOC00781	IEA		P	ADP-ribosylation factors family signature		transcript	taxon:13686	20060427	Prosite
Prosite	SiJWH03ABQ.scf	SiJWH03ABQ.scf		GO:0005622	Prosite:PS01019|Prosite:PDOC00781	IEA		P	ADP-ribosylation factors family signature		transcript	taxon:13686	20060427	Prosite
Prosite	SiJWB06ABV.scf	SiJWB06ABV.scf		GO:0004672	Prosite:PS00107|Prosite:PDOC00100	IEA		P	Protein kinases ATP-binding region signature		transcript	taxon:13686	20060427	Prosite
Prosite	SiJWB06ABV.scf	SiJWB06ABV.scf		GO:0005524	Prosite:PS00107|Prosite:PDOC00100	IEA		P	Protein kinases ATP-binding region signature		transcript	taxon:13686	20060427	Prosite
Prosite	SiJWB06ABV.scf	SiJWB06ABV.scf		GO:0006468	Prosite:PS00107|Prosite:PDOC00100	IEA		P	Protein kinases ATP-binding region signature		transcript	taxon:13686	20060427	Prosite
Prosite	SiJWB06ABV.scf	SiJWB06ABV.scf		GO:0004674	Prosite:PS00108|Prosite:PDOC00100	IEA		P	Serine/Threonine protein kinases active-site signature		transcript	taxon:13686	20060427	Prosite
Prosite	SiJWB06ABV.scf	SiJWB06ABV.scf		GO:0006468	Prosite:PS00108|Prosite:PDOC00100	IEA		P	Serine/Threonine protein kinases active-site signature		transcript	taxon:13686	20060427	Prosite
Prosite	SiJWF04ACT.scf	SiJWF04ACT.scf		GO:0016740	Prosite:PS00599|Prosite:PDOC00518	IEA		P	Aminotransferases class-II pyridoxal-phosphate attachment site		transcript	taxon:13686	20060427	Prosite
Prosite	SiJWF04ACT.scf	SiJWF04ACT.scf		GO:0008152	Prosite:PS00599|Prosite:PDOC00518	IEA		P	Aminotransferases class-II pyridoxal-phosphate attachment site		transcript	taxon:13686	20060427	Prosite
Prosite	SiJWA09AAY.scf	SiJWA09AAY.scf		GO:0003677	Prosite:PS00322|Prosite:PDOC00287	IEA		P	Histone H3 signature 1		transcript	taxon:13686	20060427	Prosite
Prosite	SiJWA09AAY.scf	SiJWA09AAY.scf		GO:0006334	Prosite:PS00322|Prosite:PDOC00287	IEA		P	Histone H3 signature 1		transcript	taxon:13686	20060427	Prosite
Prosite	SiJWA09AAY.scf	SiJWA09AAY.scf		GO:0007001	Prosite:PS00322|Prosite:PDOC00287	IEA		P	Histone H3 signature 1		transcript	taxon:13686	20060427	Prosite
Prosite	SiJWA09AAY.scf	SiJWA09AAY.scf		GO:0000786	Prosite:PS00322|Prosite:PDOC00287	IEA		P	Histone H3 signature 1		transcript	taxon:13686	20060427	Prosite
Prosite	SiJWA09AAY.scf	SiJWA09AAY.scf		GO:0005634	Prosite:PS00322|Prosite:PDOC00287	IEA		P	Histone H3 signature 1		transcript	taxon:13686	20060427	Prosite
Prosite	SiJWA09AAY.scf	SiJWA09AAY.scf		GO:0003677	Prosite:PS00959|Prosite:PDOC00287	IEA		P	Histone H3 signature 2		transcript	taxon:13686	20060427	Prosite
Prosite	SiJWA09AAY.scf	SiJWA09AAY.scf		GO:0006334	Prosite:PS00959|Prosite:PDOC00287	IEA		P	Histone H3 signature 2		transcript	taxon:13686	20060427	Prosite
Prosite	SiJWA09AAY.scf	SiJWA09AAY.scf		GO:0007001	Prosite:PS00959|Prosite:PDOC00287	IEA		P	Histone H3 signature 2		transcript	taxon:13686	20060427	Prosite
Prosite	SiJWA09AAY.scf	SiJWA09AAY.scf		GO:0000786	Prosite:PS00959|Prosite:PDOC00287	IEA		P	Histone H3 signature 2		transcript	taxon:13686	20060427	Prosite
Prosite	SiJWA09AAY.scf	SiJWA09AAY.scf		GO:0005634	Prosite:PS00959|Prosite:PDOC00287	IEA		P	Histone H3 signature 2		transcript	taxon:13686	20060427	Prosite
Prosite	SiJWE01AAY.scf	SiJWE01AAY.scf		GO:0004437	Prosite:PS00629|Prosite:PDOC00547	IEA		P	Inositol monophosphatase family signature 1		transcript	taxon:13686	20060427	Prosite
Prosite	SiJWG04AAY.scf	SiJWG04AAY.scf		GO:0004252	Prosite:PS00134|Prosite:PDOC00124	IEA		P	Serine proteases, trypsin family, histidine active site		transcript	taxon:13686	20060427	Prosite
Prosite	SiJWG04AAY.scf	SiJWG04AAY.scf		GO:0006508	Prosite:PS00134|Prosite:PDOC00124	IEA		P	Serine proteases, trypsin family, histidine active site		transcript	taxon:13686	20060427	Prosite
Prosite	SiJWD12ABJ.scf	SiJWD12ABJ.scf		GO:0003995	Prosite:PS00072|Prosite:PDOC00070	IEA		P	Acyl-CoA dehydrogenases signature 1		transcript	taxon:13686	20060427	Prosite
Prosite	SiJWD12ABJ.scf	SiJWD12ABJ.scf		GO:0006118	Prosite:PS00072|Prosite:PDOC00070	IEA		P	Acyl-CoA dehydrogenases signature 1		transcript	taxon:13686	20060427	Prosite
Prosite	SiJWE05ABJ.scf	SiJWE05ABJ.scf		GO:0003735	Prosite:PS00359|Prosite:PDOC00310	IEA		P	Ribosomal protein L11 signature		transcript	taxon:13686	20060427	Prosite
Prosite	SiJWE05ABJ.scf	SiJWE05ABJ.scf		GO:0006412	Prosite:PS00359|Prosite:PDOC00310	IEA		P	Ribosomal protein L11 signature		transcript	taxon:13686	20060427	Prosite
Prosite	SiJWE05ABJ.scf	SiJWE05ABJ.scf		GO:0005622	Prosite:PS00359|Prosite:PDOC00310	IEA		P	Ribosomal protein L11 signature		transcript	taxon:13686	20060427	Prosite
Prosite	SiJWE05ABJ.scf	SiJWE05ABJ.scf		GO:0005840	Prosite:PS00359|Prosite:PDOC00310	IEA		P	Ribosomal protein L11 signature		transcript	taxon:13686	20060427	Prosite
Prosite	SiJWG08AAJ.scf	SiJWG08AAJ.scf		GO:0004672	Prosite:PS00107|Prosite:PDOC00100	IEA		P	Protein kinases ATP-binding region signature		transcript	taxon:13686	20060427	Prosite
Prosite	SiJWG08AAJ.scf	SiJWG08AAJ.scf		GO:0005524	Prosite:PS00107|Prosite:PDOC00100	IEA		P	Protein kinases ATP-binding region signature		transcript	taxon:13686	20060427	Prosite
Prosite	SiJWG08AAJ.scf	SiJWG08AAJ.scf		GO:0006468	Prosite:PS00107|Prosite:PDOC00100	IEA		P	Protein kinases ATP-binding region signature		transcript	taxon:13686	20060427	Prosite
Prosite	SiJWG08AAJ.scf	SiJWG08AAJ.scf		GO:0004713	Prosite:PS00109|Prosite:PDOC00100	IEA		P	Tyrosine protein kinases specific active-site signature		transcript	taxon:13686	20060427	Prosite
Prosite	SiJWG08AAJ.scf	SiJWG08AAJ.scf		GO:0005524	Prosite:PS00109|Prosite:PDOC00100	IEA		P	Tyrosine protein kinases specific active-site signature		transcript	taxon:13686	20060427	Prosite
Prosite	SiJWG08AAJ.scf	SiJWG08AAJ.scf		GO:0006468	Prosite:PS00109|Prosite:PDOC00100	IEA		P	Tyrosine protein kinases specific active-site signature		transcript	taxon:13686	20060427	Prosite
Prosite	SiJWH02AAJ.scf	SiJWH02AAJ.scf		GO:0003676	Prosite:PS00028|Prosite:PDOC00028	IEA		P	Zinc finger C2H2 type domain signature		transcript	taxon:13686	20060427	Prosite
Prosite	SiJWH02AAJ.scf	SiJWH02AAJ.scf		GO:0008270	Prosite:PS00028|Prosite:PDOC00028	IEA		P	Zinc finger C2H2 type domain signature		transcript	taxon:13686	20060427	Prosite
Prosite	SiJWH02AAJ.scf	SiJWH02AAJ.scf		GO:0005634	Prosite:PS00028|Prosite:PDOC00028	IEA		P	Zinc finger C2H2 type domain signature		transcript	taxon:13686	20060427	Prosite
Prosite	SiJWA11ACH.scf	SiJWA11ACH.scf		GO:0003779	Prosite:PS00231|Prosite:PDOC00203	IEA		P	F-actin capping protein beta subunit signature		transcript	taxon:13686	20060427	Prosite
Prosite	SiJWA11ACH.scf	SiJWA11ACH.scf		GO:0030036	Prosite:PS00231|Prosite:PDOC00203	IEA		P	F-actin capping protein beta subunit signature		transcript	taxon:13686	20060427	Prosite
Prosite	SiJWA11ACH.scf	SiJWA11ACH.scf		GO:0008290	Prosite:PS00231|Prosite:PDOC00203	IEA		P	F-actin capping protein beta subunit signature		transcript	taxon:13686	20060427	Prosite
Prosite	SiJWB12ADD.scf	SiJWB12ADD.scf		GO:0004190	Prosite:PS00141|Prosite:PDOC00128	IEA		P	Eukaryotic and viral aspartyl proteases active site		transcript	taxon:13686	20060427	Prosite
Prosite	SiJWB12ADD.scf	SiJWB12ADD.scf		GO:0006508	Prosite:PS00141|Prosite:PDOC00128	IEA		P	Eukaryotic and viral aspartyl proteases active site		transcript	taxon:13686	20060427	Prosite
Prosite	SiJWD08ADE.scf	SiJWD08ADE.scf		GO:0001584	Prosite:PS00238|Prosite:PDOC00211	IEA		P	Visual pigments (opsins) retinal binding site		transcript	taxon:13686	20060427	Prosite
Prosite	SiJWD08ADE.scf	SiJWD08ADE.scf		GO:0007186	Prosite:PS00238|Prosite:PDOC00211	IEA		P	Visual pigments (opsins) retinal binding site		transcript	taxon:13686	20060427	Prosite
Prosite	SiJWD08ADE.scf	SiJWD08ADE.scf		GO:0007601	Prosite:PS00238|Prosite:PDOC00211	IEA		P	Visual pigments (opsins) retinal binding site		transcript	taxon:13686	20060427	Prosite
Prosite	SiJWD08ADE.scf	SiJWD08ADE.scf		GO:0016021	Prosite:PS00238|Prosite:PDOC00211	IEA		P	Visual pigments (opsins) retinal binding site		transcript	taxon:13686	20060427	Prosite
Prosite	SiJWF08ADF.scf	SiJWF08ADF.scf		GO:0004252	Prosite:PS00135|Prosite:PDOC00124	IEA		P	Serine proteases, trypsin family, serine active site		transcript	taxon:13686	20060427	Prosite
Prosite	SiJWF08ADF.scf	SiJWF08ADF.scf		GO:0006508	Prosite:PS00135|Prosite:PDOC00124	IEA		P	Serine proteases, trypsin family, serine active site		transcript	taxon:13686	20060427	Prosite
Prosite	SiJWG08ADG.scf	SiJWG08ADG.scf		GO:0004175	Prosite:PS00854|Prosite:PDOC00668	IEA		P	Proteasome B-type subunits signature		transcript	taxon:13686	20060427	Prosite
Prosite	SiJWG08ADG.scf	SiJWG08ADG.scf		GO:0006511	Prosite:PS00854|Prosite:PDOC00668	IEA		P	Proteasome B-type subunits signature		transcript	taxon:13686	20060427	Prosite
Prosite	SiJWG08ADG.scf	SiJWG08ADG.scf		GO:0005839	Prosite:PS00854|Prosite:PDOC00668	IEA		P	Proteasome B-type subunits signature		transcript	taxon:13686	20060427	Prosite
Prosite	SiJWA02ADH.scf	SiJWA02ADH.scf		GO:0003677	Prosite:PS00351|Prosite:PDOC00303	IEA		P	Transcription factor TFIID repeat signature		transcript	taxon:13686	20060427	Prosite
Prosite	SiJWA02ADH.scf	SiJWA02ADH.scf		GO:0003702	Prosite:PS00351|Prosite:PDOC00303	IEA		P	Transcription factor TFIID repeat signature		transcript	taxon:13686	20060427	Prosite
Prosite	SiJWA02ADH.scf	SiJWA02ADH.scf		GO:0006355	Prosite:PS00351|Prosite:PDOC00303	IEA		P	Transcription factor TFIID repeat signature		transcript	taxon:13686	20060427	Prosite
Prosite	SiJWA02ADH.scf	SiJWA02ADH.scf		GO:0006367	Prosite:PS00351|Prosite:PDOC00303	IEA		P	Transcription factor TFIID repeat signature		transcript	taxon:13686	20060427	Prosite
Prosite	SiJWA02ADH.scf	SiJWA02ADH.scf		GO:0005634	Prosite:PS00351|Prosite:PDOC00303	IEA		P	Transcription factor TFIID repeat signature		transcript	taxon:13686	20060427	Prosite
Prosite	SiJWA02ADH.scf	SiJWA02ADH.scf		GO:0005669	Prosite:PS00351|Prosite:PDOC00303	IEA		P	Transcription factor TFIID repeat signature		transcript	taxon:13686	20060427	Prosite
Prosite	SiJWF08ADJ.scf	SiJWF08ADJ.scf		GO:0004867	Prosite:PS00284|Prosite:PDOC00256	IEA		P	Serpins signature		transcript	taxon:13686	20060427	Prosite
Prosite	SiJWD10ADU.scf	SiJWD10ADU.scf		GO:0004812	Prosite:PS00178|Prosite:PDOC00161	IEA		P	Aminoacyl-transfer RNA synthetases class-I signature		transcript	taxon:13686	20060427	Prosite
Prosite	SiJWD10ADU.scf	SiJWD10ADU.scf		GO:0005524	Prosite:PS00178|Prosite:PDOC00161	IEA		P	Aminoacyl-transfer RNA synthetases class-I signature		transcript	taxon:13686	20060427	Prosite
Prosite	SiJWD10ADU.scf	SiJWD10ADU.scf		GO:0006418	Prosite:PS00178|Prosite:PDOC00161	IEA		P	Aminoacyl-transfer RNA synthetases class-I signature		transcript	taxon:13686	20060427	Prosite
Prosite	SiJWE09ADU.scf	SiJWE09ADU.scf		GO:0003676	Prosite:PS00028|Prosite:PDOC00028	IEA		P	Zinc finger C2H2 type domain signature		transcript	taxon:13686	20060427	Prosite
Prosite	SiJWE09ADU.scf	SiJWE09ADU.scf		GO:0008270	Prosite:PS00028|Prosite:PDOC00028	IEA		P	Zinc finger C2H2 type domain signature		transcript	taxon:13686	20060427	Prosite
Prosite	SiJWE09ADU.scf	SiJWE09ADU.scf		GO:0005634	Prosite:PS00028|Prosite:PDOC00028	IEA		P	Zinc finger C2H2 type domain signature		transcript	taxon:13686	20060427	Prosite
Prosite	SiJWB02ADX.scf	SiJWB02ADX.scf		GO:0000287	Prosite:PS00387|Prosite:PDOC00325	IEA		P	Inorganic pyrophosphatase signature		transcript	taxon:13686	20060427	Prosite
Prosite	SiJWB02ADX.scf	SiJWB02ADX.scf		GO:0004427	Prosite:PS00387|Prosite:PDOC00325	IEA		P	Inorganic pyrophosphatase signature		transcript	taxon:13686	20060427	Prosite
Prosite	SiJWB02ADX.scf	SiJWB02ADX.scf		GO:0006796	Prosite:PS00387|Prosite:PDOC00325	IEA		P	Inorganic pyrophosphatase signature		transcript	taxon:13686	20060427	Prosite
Prosite	SiJWB02ADX.scf	SiJWB02ADX.scf		GO:0005737	Prosite:PS00387|Prosite:PDOC00325	IEA		P	Inorganic pyrophosphatase signature		transcript	taxon:13686	20060427	Prosite
Prosite	SiJWE07ADA.scf	SiJWE07ADA.scf		GO:0016491	Prosite:PS00061|Prosite:PDOC00060	IEA		P	Short-chain dehydrogenases/reductases family signature		transcript	taxon:13686	20060427	Prosite
Prosite	SiJWE07ADA.scf	SiJWE07ADA.scf		GO:0008152	Prosite:PS00061|Prosite:PDOC00060	IEA		P	Short-chain dehydrogenases/reductases family signature		transcript	taxon:13686	20060427	Prosite
Prosite	SiJWF05ADM.scf	SiJWF05ADM.scf		GO:0003677	Prosite:PS00047|Prosite:PDOC00046	IEA		P	Histone H4 signature		transcript	taxon:13686	20060427	Prosite
Prosite	SiJWF05ADM.scf	SiJWF05ADM.scf		GO:0006334	Prosite:PS00047|Prosite:PDOC00046	IEA		P	Histone H4 signature		transcript	taxon:13686	20060427	Prosite
Prosite	SiJWF05ADM.scf	SiJWF05ADM.scf		GO:0007001	Prosite:PS00047|Prosite:PDOC00046	IEA		P	Histone H4 signature		transcript	taxon:13686	20060427	Prosite
Prosite	SiJWF05ADM.scf	SiJWF05ADM.scf		GO:0000786	Prosite:PS00047|Prosite:PDOC00046	IEA		P	Histone H4 signature		transcript	taxon:13686	20060427	Prosite
Prosite	SiJWF05ADM.scf	SiJWF05ADM.scf		GO:0005634	Prosite:PS00047|Prosite:PDOC00046	IEA		P	Histone H4 signature		transcript	taxon:13686	20060427	Prosite
Prosite	SiJWH10ADM.scf	SiJWH10ADM.scf		GO:0003684	Prosite:PS00752|Prosite:PDOC00611	IEA		P	XPA protein signature 1		transcript	taxon:13686	20060427	Prosite
Prosite	SiJWH10ADM.scf	SiJWH10ADM.scf		GO:0006289	Prosite:PS00752|Prosite:PDOC00611	IEA		P	XPA protein signature 1		transcript	taxon:13686	20060427	Prosite
Prosite	SiJWH10ADM.scf	SiJWH10ADM.scf		GO:0005634	Prosite:PS00752|Prosite:PDOC00611	IEA		P	XPA protein signature 1		transcript	taxon:13686	20060427	Prosite
Prosite	SiJWH10ADM.scf	SiJWH10ADM.scf		GO:0003684	Prosite:PS00753|Prosite:PDOC00611	IEA		P	XPA protein signature 2		transcript	taxon:13686	20060427	Prosite
Prosite	SiJWH10ADM.scf	SiJWH10ADM.scf		GO:0006289	Prosite:PS00753|Prosite:PDOC00611	IEA		P	XPA protein signature 2		transcript	taxon:13686	20060427	Prosite
Prosite	SiJWH10ADM.scf	SiJWH10ADM.scf		GO:0005634	Prosite:PS00753|Prosite:PDOC00611	IEA		P	XPA protein signature 2		transcript	taxon:13686	20060427	Prosite
Prosite	SiJWA11ADN.scf	SiJWA11ADN.scf		GO:0004289	Prosite:PS00136|Prosite:PDOC00125	IEA		P	Serine proteases, subtilase family, aspartic acid active site		transcript	taxon:13686	20060427	Prosite
Prosite	SiJWA11ADN.scf	SiJWA11ADN.scf		GO:0006508	Prosite:PS00136|Prosite:PDOC00125	IEA		P	Serine proteases, subtilase family, aspartic acid active site		transcript	taxon:13686	20060427	Prosite
Prosite	SiJWD04ADV.scf	SiJWD04ADV.scf		GO:0004519	Prosite:PS00726|Prosite:PDOC00598	IEA		P	AP endonucleases family 1 signature 1		transcript	taxon:13686	20060427	Prosite
Prosite	SiJWD04ADV.scf	SiJWD04ADV.scf		GO:0006281	Prosite:PS00726|Prosite:PDOC00598	IEA		P	AP endonucleases family 1 signature 1		transcript	taxon:13686	20060427	Prosite
Prosite	SiJWA04ACY.scf	SiJWA04ACY.scf		GO:0004750	Prosite:PS01085|Prosite:PDOC00833	IEA		P	Ribulose-phosphate 3-epimerase family signature 1		transcript	taxon:13686	20060427	Prosite
Prosite	SiJWA04ACY.scf	SiJWA04ACY.scf		GO:0005975	Prosite:PS01085|Prosite:PDOC00833	IEA		P	Ribulose-phosphate 3-epimerase family signature 1		transcript	taxon:13686	20060427	Prosite
Prosite	SiJWF03ACY.scf	SiJWF03ACY.scf		GO:0003677	Prosite:PS00115|Prosite:PDOC00106	IEA		P	Eukaryotic RNA polymerase II heptapeptide repeat		transcript	taxon:13686	20060427	Prosite
Prosite	SiJWF03ACY.scf	SiJWF03ACY.scf		GO:0006366	Prosite:PS00115|Prosite:PDOC00106	IEA		P	Eukaryotic RNA polymerase II heptapeptide repeat		transcript	taxon:13686	20060427	Prosite
Prosite	SiJWF03ACY.scf	SiJWF03ACY.scf		GO:0005665	Prosite:PS00115|Prosite:PDOC00106	IEA		P	Eukaryotic RNA polymerase II heptapeptide repeat		transcript	taxon:13686	20060427	Prosite
Prosite	SiJWG05BAD.scf	SiJWG05BAD.scf		GO:0000287	Prosite:PS00387|Prosite:PDOC00325	IEA		P	Inorganic pyrophosphatase signature		transcript	taxon:13686	20060427	Prosite
Prosite	SiJWG05BAD.scf	SiJWG05BAD.scf		GO:0004427	Prosite:PS00387|Prosite:PDOC00325	IEA		P	Inorganic pyrophosphatase signature		transcript	taxon:13686	20060427	Prosite
Prosite	SiJWG05BAD.scf	SiJWG05BAD.scf		GO:0006796	Prosite:PS00387|Prosite:PDOC00325	IEA		P	Inorganic pyrophosphatase signature		transcript	taxon:13686	20060427	Prosite
Prosite	SiJWG05BAD.scf	SiJWG05BAD.scf		GO:0005737	Prosite:PS00387|Prosite:PDOC00325	IEA		P	Inorganic pyrophosphatase signature		transcript	taxon:13686	20060427	Prosite
Prosite	SiJWG10ADB.scf	SiJWG10ADB.scf		GO:0004713	Prosite:PS00109|Prosite:PDOC00100	IEA		P	Tyrosine protein kinases specific active-site signature		transcript	taxon:13686	20060427	Prosite
Prosite	SiJWG10ADB.scf	SiJWG10ADB.scf		GO:0005524	Prosite:PS00109|Prosite:PDOC00100	IEA		P	Tyrosine protein kinases specific active-site signature		transcript	taxon:13686	20060427	Prosite
Prosite	SiJWG10ADB.scf	SiJWG10ADB.scf		GO:0006468	Prosite:PS00109|Prosite:PDOC00100	IEA		P	Tyrosine protein kinases specific active-site signature		transcript	taxon:13686	20060427	Prosite
Prosite	SiJWA11ADO.scf	SiJWA11ADO.scf		GO:0031072	Prosite:PS00636|Prosite:PDOC00553	IEA		P	Nt-dnaJ domain signature		transcript	taxon:13686	20060427	Prosite
Prosite	SiJWD07ADO.scf	SiJWD07ADO.scf		GO:0005509	Prosite:PS00018|Prosite:PDOC00018	IEA		P	EF-hand calcium-binding domain		transcript	taxon:13686	20060427	Prosite
Prosite	SiJWH07ADT.scf	SiJWH07ADT.scf		GO:0004497	Prosite:PS00086|Prosite:PDOC00081	IEA		P	Cytochrome P450 cysteine heme-iron ligand signature		transcript	taxon:13686	20060427	Prosite
Prosite	SiJWH07ADT.scf	SiJWH07ADT.scf		GO:0005506	Prosite:PS00086|Prosite:PDOC00081	IEA		P	Cytochrome P450 cysteine heme-iron ligand signature		transcript	taxon:13686	20060427	Prosite
Prosite	SiJWH07ADT.scf	SiJWH07ADT.scf		GO:0020037	Prosite:PS00086|Prosite:PDOC00081	IEA		P	Cytochrome P450 cysteine heme-iron ligand signature		transcript	taxon:13686	20060427	Prosite
Prosite	SiJWH07ADT.scf	SiJWH07ADT.scf		GO:0006118	Prosite:PS00086|Prosite:PDOC00081	IEA		P	Cytochrome P450 cysteine heme-iron ligand signature		transcript	taxon:13686	20060427	Prosite
Prosite	SiJWA10ADW.scf	SiJWA10ADW.scf		GO:0003676	Prosite:PS00039|Prosite:PDOC00039	IEA		P	DEAD-box subfamily ATP-dependent helicases signature		transcript	taxon:13686	20060427	Prosite
Prosite	SiJWA10ADW.scf	SiJWA10ADW.scf		GO:0005524	Prosite:PS00039|Prosite:PDOC00039	IEA		P	DEAD-box subfamily ATP-dependent helicases signature		transcript	taxon:13686	20060427	Prosite
Prosite	SiJWA10ADW.scf	SiJWA10ADW.scf		GO:0008026	Prosite:PS00039|Prosite:PDOC00039	IEA		P	DEAD-box subfamily ATP-dependent helicases signature		transcript	taxon:13686	20060427	Prosite
Prosite	SiJWG08BAE.scf	SiJWG08BAE.scf		GO:0004553	Prosite:PS00719|Prosite:PDOC00531	IEA		P	Glycosyl hydrolases family 2 signature 1		transcript	taxon:13686	20060427	Prosite
Prosite	SiJWG08BAE.scf	SiJWG08BAE.scf		GO:0005975	Prosite:PS00719|Prosite:PDOC00531	IEA		P	Glycosyl hydrolases family 2 signature 1		transcript	taxon:13686	20060427	Prosite
Prosite	SiJWG08BAE.scf	SiJWG08BAE.scf		GO:0004553	Prosite:PS00608|Prosite:PDOC00531	IEA		P	Glycosyl hydrolases family 2 acid/base catalyst		transcript	taxon:13686	20060427	Prosite
Prosite	SiJWG08BAE.scf	SiJWG08BAE.scf		GO:0005975	Prosite:PS00608|Prosite:PDOC00531	IEA		P	Glycosyl hydrolases family 2 acid/base catalyst		transcript	taxon:13686	20060427	Prosite
Prosite	SiJWC05BAI.scf	SiJWC05BAI.scf		GO:0005509	Prosite:PS00018|Prosite:PDOC00018	IEA		P	EF-hand calcium-binding domain		transcript	taxon:13686	20060427	Prosite
Prosite	SiJWD08BAM.scf	SiJWD08BAM.scf		GO:0004867	Prosite:PS00284|Prosite:PDOC00256	IEA		P	Serpins signature		transcript	taxon:13686	20060427	Prosite
Prosite	SiJWC05BAR.scf	SiJWC05BAR.scf		GO:0004672	Prosite:PS00107|Prosite:PDOC00100	IEA		P	Protein kinases ATP-binding region signature		transcript	taxon:13686	20060427	Prosite
Prosite	SiJWC05BAR.scf	SiJWC05BAR.scf		GO:0005524	Prosite:PS00107|Prosite:PDOC00100	IEA		P	Protein kinases ATP-binding region signature		transcript	taxon:13686	20060427	Prosite
Prosite	SiJWC05BAR.scf	SiJWC05BAR.scf		GO:0006468	Prosite:PS00107|Prosite:PDOC00100	IEA		P	Protein kinases ATP-binding region signature		transcript	taxon:13686	20060427	Prosite
Prosite	SiJWG01BAR.scf	SiJWG01BAR.scf		GO:0005200	Prosite:PS00406|Prosite:PDOC00340	IEA		P	Actins signature 1		transcript	taxon:13686	20060427	Prosite
Prosite	SiJWG01BAR.scf	SiJWG01BAR.scf		GO:0005524	Prosite:PS00406|Prosite:PDOC00340	IEA		P	Actins signature 1		transcript	taxon:13686	20060427	Prosite
Prosite	SiJWG01BAR.scf	SiJWG01BAR.scf		GO:0005884	Prosite:PS00406|Prosite:PDOC00340	IEA		P	Actins signature 1		transcript	taxon:13686	20060427	Prosite
Prosite	SiJWG01BAR.scf	SiJWG01BAR.scf		GO:0005515	Prosite:PS01132|Prosite:PDOC00340	IEA		P	Actins and actin-related proteins signature		transcript	taxon:13686	20060427	Prosite
Prosite	SiJWH09AAW.scf	SiJWH09AAW.scf		GO:0016849	Prosite:PS00452|Prosite:PDOC00425	IEA		P	Guanylate cyclases signature		transcript	taxon:13686	20060427	Prosite
Prosite	SiJWH09AAW.scf	SiJWH09AAW.scf		GO:0007242	Prosite:PS00452|Prosite:PDOC00425	IEA		P	Guanylate cyclases signature		transcript	taxon:13686	20060427	Prosite
Prosite	SiJWH09AAW.scf	SiJWH09AAW.scf		GO:0009190	Prosite:PS00452|Prosite:PDOC00425	IEA		P	Guanylate cyclases signature		transcript	taxon:13686	20060427	Prosite
Prosite	SiJWF08BAQ.scf	SiJWF08BAQ.scf		GO:0005198	Prosite:PS00664|Prosite:PDOC00568	IEA		P	Vinculin repeated domain signature		transcript	taxon:13686	20060427	Prosite
Prosite	SiJWF08BAQ.scf	SiJWF08BAQ.scf		GO:0007155	Prosite:PS00664|Prosite:PDOC00568	IEA		P	Vinculin repeated domain signature		transcript	taxon:13686	20060427	Prosite
Prosite	SiJWF08BAQ.scf	SiJWF08BAQ.scf		GO:0015629	Prosite:PS00664|Prosite:PDOC00568	IEA		P	Vinculin repeated domain signature		transcript	taxon:13686	20060427	Prosite
Prosite	SiJWH08BAP.scf	SiJWH08BAP.scf		GO:0006886	Prosite:PS00991|Prosite:PDOC00761	IEA		P	Clathrin adaptor complexes medium chain signature 2		transcript	taxon:13686	20060427	Prosite
Prosite	SiJWH08BAP.scf	SiJWH08BAP.scf		GO:0030125	Prosite:PS00991|Prosite:PDOC00761	IEA		P	Clathrin adaptor complexes medium chain signature 2		transcript	taxon:13686	20060427	Prosite
Prosite	SiJWE08BAJ.scf	SiJWE08BAJ.scf		GO:0003779	Prosite:PS00325|Prosite:PDOC00297	IEA		P	Actin-depolymerizing proteins signature		transcript	taxon:13686	20060427	Prosite
Prosite	SiJWE08BAJ.scf	SiJWE08BAJ.scf		GO:0005622	Prosite:PS00325|Prosite:PDOC00297	IEA		P	Actin-depolymerizing proteins signature		transcript	taxon:13686	20060427	Prosite
Prosite	SiJWH07BAJ.scf	SiJWH07BAJ.scf		GO:0003677	Prosite:PS00446|Prosite:PDOC00411	IEA		P	RNA polymerases D / 30 to 40 Kd subunits signature		transcript	taxon:13686	20060427	Prosite
Prosite	SiJWH07BAJ.scf	SiJWH07BAJ.scf		GO:0003899	Prosite:PS00446|Prosite:PDOC00411	IEA		P	RNA polymerases D / 30 to 40 Kd subunits signature		transcript	taxon:13686	20060427	Prosite
Prosite	SiJWH07BAJ.scf	SiJWH07BAJ.scf		GO:0006350	Prosite:PS00446|Prosite:PDOC00411	IEA		P	RNA polymerases D / 30 to 40 Kd subunits signature		transcript	taxon:13686	20060427	Prosite
Prosite	SiJWH07BAJ.scf	SiJWH07BAJ.scf		GO:0005634	Prosite:PS00446|Prosite:PDOC00411	IEA		P	RNA polymerases D / 30 to 40 Kd subunits signature		transcript	taxon:13686	20060427	Prosite
Prosite	SiJWC03AAG.scf	SiJWC03AAG.scf		GO:0003676	Prosite:PS00028|Prosite:PDOC00028	IEA		P	Zinc finger C2H2 type domain signature		transcript	taxon:13686	20060427	Prosite
Prosite	SiJWC03AAG.scf	SiJWC03AAG.scf		GO:0008270	Prosite:PS00028|Prosite:PDOC00028	IEA		P	Zinc finger C2H2 type domain signature		transcript	taxon:13686	20060427	Prosite
Prosite	SiJWC03AAG.scf	SiJWC03AAG.scf		GO:0005634	Prosite:PS00028|Prosite:PDOC00028	IEA		P	Zinc finger C2H2 type domain signature		transcript	taxon:13686	20060427	Prosite
Prosite	SiJWC11AAG.scf	SiJWC11AAG.scf		GO:0006886	Prosite:PS00990|Prosite:PDOC00761	IEA		P	Clathrin adaptor complexes medium chain signature 1		transcript	taxon:13686	20060427	Prosite
Prosite	SiJWC11AAG.scf	SiJWC11AAG.scf		GO:0030125	Prosite:PS00990|Prosite:PDOC00761	IEA		P	Clathrin adaptor complexes medium chain signature 1		transcript	taxon:13686	20060427	Prosite
Prosite	SiJWC11AAR.scf	SiJWC11AAR.scf		GO:0016491	Prosite:PS00063|Prosite:PDOC00061	IEA		P	Aldo/keto reductase family putative active site signature		transcript	taxon:13686	20060427	Prosite
Prosite	SiJWF09AAS.scf	SiJWF09AAS.scf		GO:0016491	Prosite:PS00687|Prosite:PDOC00068	IEA		P	Aldehyde dehydrogenases glutamic acid active site		transcript	taxon:13686	20060427	Prosite
Prosite	SiJWF09AAS.scf	SiJWF09AAS.scf		GO:0008152	Prosite:PS00687|Prosite:PDOC00068	IEA		P	Aldehyde dehydrogenases glutamic acid active site		transcript	taxon:13686	20060427	Prosite
Prosite	SiJWF09AAS.scf	SiJWF09AAS.scf		GO:0016491	Prosite:PS00070|Prosite:PDOC00068	IEA		P	Aldehyde dehydrogenases cysteine active site		transcript	taxon:13686	20060427	Prosite
Prosite	SiJWF09AAS.scf	SiJWF09AAS.scf		GO:0008152	Prosite:PS00070|Prosite:PDOC00068	IEA		P	Aldehyde dehydrogenases cysteine active site		transcript	taxon:13686	20060427	Prosite
Prosite	SiJWE08BBF.scf	SiJWE08BBF.scf		GO:0003677	Prosite:PS00357|Prosite:PDOC00308	IEA		P	Histone H2B signature		transcript	taxon:13686	20060427	Prosite
Prosite	SiJWE08BBF.scf	SiJWE08BBF.scf		GO:0006334	Prosite:PS00357|Prosite:PDOC00308	IEA		P	Histone H2B signature		transcript	taxon:13686	20060427	Prosite
Prosite	SiJWE08BBF.scf	SiJWE08BBF.scf		GO:0007001	Prosite:PS00357|Prosite:PDOC00308	IEA		P	Histone H2B signature		transcript	taxon:13686	20060427	Prosite
Prosite	SiJWE08BBF.scf	SiJWE08BBF.scf		GO:0000786	Prosite:PS00357|Prosite:PDOC00308	IEA		P	Histone H2B signature		transcript	taxon:13686	20060427	Prosite
Prosite	SiJWE08BBF.scf	SiJWE08BBF.scf		GO:0005634	Prosite:PS00357|Prosite:PDOC00308	IEA		P	Histone H2B signature		transcript	taxon:13686	20060427	Prosite
Prosite	SiJWB10BBI.scf	SiJWB10BBI.scf		GO:0004252	Prosite:PS00135|Prosite:PDOC00124	IEA		P	Serine proteases, trypsin family, serine active site		transcript	taxon:13686	20060427	Prosite
Prosite	SiJWB10BBI.scf	SiJWB10BBI.scf		GO:0006508	Prosite:PS00135|Prosite:PDOC00124	IEA		P	Serine proteases, trypsin family, serine active site		transcript	taxon:13686	20060427	Prosite
Prosite	SiJWC04BBI.scf	SiJWC04BBI.scf		GO:0003824	Prosite:PS00166|Prosite:PDOC00150	IEA		P	Enoyl-CoA hydratase/isomerase signature		transcript	taxon:13686	20060427	Prosite
Prosite	SiJWC04BBI.scf	SiJWC04BBI.scf		GO:0008152	Prosite:PS00166|Prosite:PDOC00150	IEA		P	Enoyl-CoA hydratase/isomerase signature		transcript	taxon:13686	20060427	Prosite
Prosite	SiJWE11BBK.scf	SiJWE11BBK.scf		GO:0003700	Prosite:PS00027|Prosite:PDOC00027	IEA		P	'Homeobox' domain signature		transcript	taxon:13686	20060427	Prosite
Prosite	SiJWE11BBK.scf	SiJWE11BBK.scf		GO:0043565	Prosite:PS00027|Prosite:PDOC00027	IEA		P	'Homeobox' domain signature		transcript	taxon:13686	20060427	Prosite
Prosite	SiJWE11BBK.scf	SiJWE11BBK.scf		GO:0006355	Prosite:PS00027|Prosite:PDOC00027	IEA		P	'Homeobox' domain signature		transcript	taxon:13686	20060427	Prosite
Prosite	SiJWE11BBK.scf	SiJWE11BBK.scf		GO:0005634	Prosite:PS00027|Prosite:PDOC00027	IEA		P	'Homeobox' domain signature		transcript	taxon:13686	20060427	Prosite
Prosite	SiJWD02AAH.scf	SiJWD02AAH.scf		GO:0004518	Prosite:PS00841|Prosite:PDOC00658	IEA		P	XPG protein signature 1		transcript	taxon:13686	20060427	Prosite
Prosite	SiJWD02AAH.scf	SiJWD02AAH.scf		GO:0006281	Prosite:PS00841|Prosite:PDOC00658	IEA		P	XPG protein signature 1		transcript	taxon:13686	20060427	Prosite
Prosite	SiJWD02AAH.scf	SiJWD02AAH.scf		GO:0004518	Prosite:PS00842|Prosite:PDOC00658	IEA		P	XPG protein signature 2		transcript	taxon:13686	20060427	Prosite
Prosite	SiJWD02AAH.scf	SiJWD02AAH.scf		GO:0006281	Prosite:PS00842|Prosite:PDOC00658	IEA		P	XPG protein signature 2		transcript	taxon:13686	20060427	Prosite
Prosite	SiJWC10ABO.scf	SiJWC10ABO.scf		GO:0005509	Prosite:PS00805|Prosite:PDOC00636	IEA		P	Calreticulin family repeated motif signature		transcript	taxon:13686	20060427	Prosite
Prosite	SiJWG05BBT.scf	SiJWG05BBT.scf		GO:0016615	Prosite:PS00068|Prosite:PDOC00066	IEA		P	Malate dehydrogenase active site signature		transcript	taxon:13686	20060427	Prosite
Prosite	SiJWG05BBT.scf	SiJWG05BBT.scf		GO:0006108	Prosite:PS00068|Prosite:PDOC00066	IEA		P	Malate dehydrogenase active site signature		transcript	taxon:13686	20060427	Prosite
Prosite	SiJWG01BBU.scf	SiJWG01BBU.scf		GO:0000166	Prosite:PS00116|Prosite:PDOC00107	IEA		P	DNA polymerase family B signature		transcript	taxon:13686	20060427	Prosite
Prosite	SiJWG01BBU.scf	SiJWG01BBU.scf		GO:0003677	Prosite:PS00116|Prosite:PDOC00107	IEA		P	DNA polymerase family B signature		transcript	taxon:13686	20060427	Prosite
Prosite	SiJWG01BBU.scf	SiJWG01BBU.scf		GO:0003887	Prosite:PS00116|Prosite:PDOC00107	IEA		P	DNA polymerase family B signature		transcript	taxon:13686	20060427	Prosite
Prosite	SiJWG01BBU.scf	SiJWG01BBU.scf		GO:0008408	Prosite:PS00116|Prosite:PDOC00107	IEA		P	DNA polymerase family B signature		transcript	taxon:13686	20060427	Prosite
Prosite	SiJWG01BBU.scf	SiJWG01BBU.scf		GO:0006260	Prosite:PS00116|Prosite:PDOC00107	IEA		P	DNA polymerase family B signature		transcript	taxon:13686	20060427	Prosite
Prosite	SiJWA07BBU.scf	SiJWA07BBU.scf		GO:0003779	Prosite:PS00414|Prosite:PDOC00372	IEA		P	Profilin signature		transcript	taxon:13686	20060427	Prosite
Prosite	SiJWA07BBU.scf	SiJWA07BBU.scf		GO:0007010	Prosite:PS00414|Prosite:PDOC00372	IEA		P	Profilin signature		transcript	taxon:13686	20060427	Prosite
Prosite	SiJWA07BBU.scf	SiJWA07BBU.scf		GO:0015629	Prosite:PS00414|Prosite:PDOC00372	IEA		P	Profilin signature		transcript	taxon:13686	20060427	Prosite
Prosite	SiJWD05BBW.scf	SiJWD05BBW.scf		GO:0004252	Prosite:PS00134|Prosite:PDOC00124	IEA		P	Serine proteases, trypsin family, histidine active site		transcript	taxon:13686	20060427	Prosite
Prosite	SiJWD05BBW.scf	SiJWD05BBW.scf		GO:0006508	Prosite:PS00134|Prosite:PDOC00124	IEA		P	Serine proteases, trypsin family, histidine active site		transcript	taxon:13686	20060427	Prosite
Prosite	SiJWD05BBW.scf	SiJWD05BBW.scf		GO:0004252	Prosite:PS00135|Prosite:PDOC00124	IEA		P	Serine proteases, trypsin family, serine active site		transcript	taxon:13686	20060427	Prosite
Prosite	SiJWD05BBW.scf	SiJWD05BBW.scf		GO:0006508	Prosite:PS00135|Prosite:PDOC00124	IEA		P	Serine proteases, trypsin family, serine active site		transcript	taxon:13686	20060427	Prosite
Prosite	SiJWE09BBW.scf	SiJWE09BBW.scf		GO:0005509	Prosite:PS00232|Prosite:PDOC00205	IEA		P	Cadherin domain signature		transcript	taxon:13686	20060427	Prosite
Prosite	SiJWE09BBW.scf	SiJWE09BBW.scf		GO:0007156	Prosite:PS00232|Prosite:PDOC00205	IEA		P	Cadherin domain signature		transcript	taxon:13686	20060427	Prosite
Prosite	SiJWE09BBW.scf	SiJWE09BBW.scf		GO:0016020	Prosite:PS00232|Prosite:PDOC00205	IEA		P	Cadherin domain signature		transcript	taxon:13686	20060427	Prosite
Prosite	SiJWC10BBX.scf	SiJWC10BBX.scf		GO:0005344	Prosite:PS00210|Prosite:PDOC00184	IEA		P	Arthropod hemocyanins / insect LSPs signature 2		transcript	taxon:13686	20060427	Prosite
Prosite	SiJWC10BBX.scf	SiJWC10BBX.scf		GO:0006810	Prosite:PS00210|Prosite:PDOC00184	IEA		P	Arthropod hemocyanins / insect LSPs signature 2		transcript	taxon:13686	20060427	Prosite
Prosite	SiJWD12BBZ.scf	SiJWD12BBZ.scf		GO:0005515	Prosite:PS01359|Prosite:PDOC50016	IEA		P	Zinc finger PHD-type signature		transcript	taxon:13686	20060427	Prosite
Prosite	SiJWD12BBZ.scf	SiJWD12BBZ.scf		GO:0008270	Prosite:PS01359|Prosite:PDOC50016	IEA		P	Zinc finger PHD-type signature		transcript	taxon:13686	20060427	Prosite
Prosite	SiJWD12BBZ.scf	SiJWD12BBZ.scf		GO:0006355	Prosite:PS01359|Prosite:PDOC50016	IEA		P	Zinc finger PHD-type signature		transcript	taxon:13686	20060427	Prosite
Prosite	SiJWB10CAB.scf	SiJWB10CAB.scf		GO:0004252	Prosite:PS00134|Prosite:PDOC00124	IEA		P	Serine proteases, trypsin family, histidine active site		transcript	taxon:13686	20060427	Prosite
Prosite	SiJWB10CAB.scf	SiJWB10CAB.scf		GO:0006508	Prosite:PS00134|Prosite:PDOC00124	IEA		P	Serine proteases, trypsin family, histidine active site		transcript	taxon:13686	20060427	Prosite
Prosite	SiJWF09CAB.scf	SiJWF09CAB.scf		GO:0004190	Prosite:PS00141|Prosite:PDOC00128	IEA		P	Eukaryotic and viral aspartyl proteases active site		transcript	taxon:13686	20060427	Prosite
Prosite	SiJWF09CAB.scf	SiJWF09CAB.scf		GO:0006508	Prosite:PS00141|Prosite:PDOC00128	IEA		P	Eukaryotic and viral aspartyl proteases active site		transcript	taxon:13686	20060427	Prosite
Prosite	SiJWA10CAE.scf	SiJWA10CAE.scf		GO:0005085	Prosite:PS00720|Prosite:PDOC00594	IEA		P	Ras Guanine-nucleotide exchange factors domain signature		transcript	taxon:13686	20060427	Prosite
Prosite	SiJWA10CAE.scf	SiJWA10CAE.scf		GO:0007242	Prosite:PS00720|Prosite:PDOC00594	IEA		P	Ras Guanine-nucleotide exchange factors domain signature		transcript	taxon:13686	20060427	Prosite
Prosite	SiJWG05BDU.scf	SiJWG05BDU.scf		GO:0003676	Prosite:PS00028|Prosite:PDOC00028	IEA		P	Zinc finger C2H2 type domain signature		transcript	taxon:13686	20060427	Prosite
Prosite	SiJWG05BDU.scf	SiJWG05BDU.scf		GO:0008270	Prosite:PS00028|Prosite:PDOC00028	IEA		P	Zinc finger C2H2 type domain signature		transcript	taxon:13686	20060427	Prosite
Prosite	SiJWG05BDU.scf	SiJWG05BDU.scf		GO:0005634	Prosite:PS00028|Prosite:PDOC00028	IEA		P	Zinc finger C2H2 type domain signature		transcript	taxon:13686	20060427	Prosite
Prosite	SiJWH04BDG.scf	SiJWH04BDG.scf		GO:0005509	Prosite:PS00018|Prosite:PDOC00018	IEA		P	EF-hand calcium-binding domain		transcript	taxon:13686	20060427	Prosite
Prosite	SiJWC12BDF.scf	SiJWC12BDF.scf		GO:0003779	Prosite:PS00019|Prosite:PDOC00019	IEA		P	Actinin-type actin-binding domain signature 1		transcript	taxon:13686	20060427	Prosite
Prosite	SiJWB04BCR.scf	SiJWB04BCR.scf		GO:0004252	Prosite:PS00135|Prosite:PDOC00124	IEA		P	Serine proteases, trypsin family, serine active site		transcript	taxon:13686	20060427	Prosite
Prosite	SiJWB04BCR.scf	SiJWB04BCR.scf		GO:0006508	Prosite:PS00135|Prosite:PDOC00124	IEA		P	Serine proteases, trypsin family, serine active site		transcript	taxon:13686	20060427	Prosite
Prosite	SiJWA08BCX2.scf	SiJWA08BCX2.scf		GO:0008270	Prosite:PS00478|Prosite:PDOC00382	IEA		P	LIM zinc-binding domain signature		transcript	taxon:13686	20060427	Prosite
Prosite	SiJWB03CAP.scf	SiJWB03CAP.scf		GO:0003676	Prosite:PS00028|Prosite:PDOC00028	IEA		P	Zinc finger C2H2 type domain signature		transcript	taxon:13686	20060427	Prosite
Prosite	SiJWB03CAP.scf	SiJWB03CAP.scf		GO:0008270	Prosite:PS00028|Prosite:PDOC00028	IEA		P	Zinc finger C2H2 type domain signature		transcript	taxon:13686	20060427	Prosite
Prosite	SiJWB03CAP.scf	SiJWB03CAP.scf		GO:0005634	Prosite:PS00028|Prosite:PDOC00028	IEA		P	Zinc finger C2H2 type domain signature		transcript	taxon:13686	20060427	Prosite
Prosite	SiJWC04BDH.scf	SiJWC04BDH.scf		GO:0008442	Prosite:PS00895|Prosite:PDOC00697	IEA		P	3-hydroxyisobutyrate dehydrogenase signature		transcript	taxon:13686	20060427	Prosite
Prosite	SiJWC04BDH.scf	SiJWC04BDH.scf		GO:0006573	Prosite:PS00895|Prosite:PDOC00697	IEA		P	3-hydroxyisobutyrate dehydrogenase signature		transcript	taxon:13686	20060427	Prosite
Prosite	SiJWF07BDQ.scf	SiJWF07BDQ.scf		GO:0005489	Prosite:PS00197|Prosite:PDOC00175	IEA		P	2Fe-2S ferredoxins, iron-sulfur binding region signature		transcript	taxon:13686	20060427	Prosite
Prosite	SiJWF07BDQ.scf	SiJWF07BDQ.scf		GO:0006118	Prosite:PS00197|Prosite:PDOC00175	IEA		P	2Fe-2S ferredoxins, iron-sulfur binding region signature		transcript	taxon:13686	20060427	Prosite
Prosite	SiJWA10BAY2.scf	SiJWA10BAY2.scf		GO:0005515	Prosite:PS01132|Prosite:PDOC00340	IEA		P	Actins and actin-related proteins signature		transcript	taxon:13686	20060427	Prosite
Prosite	SiJWH01BBC2.scf	SiJWH01BBC2.scf		GO:0003676	Prosite:PS00028|Prosite:PDOC00028	IEA		P	Zinc finger C2H2 type domain signature		transcript	taxon:13686	20060427	Prosite
Prosite	SiJWH01BBC2.scf	SiJWH01BBC2.scf		GO:0008270	Prosite:PS00028|Prosite:PDOC00028	IEA		P	Zinc finger C2H2 type domain signature		transcript	taxon:13686	20060427	Prosite
Prosite	SiJWH01BBC2.scf	SiJWH01BBC2.scf		GO:0005634	Prosite:PS00028|Prosite:PDOC00028	IEA		P	Zinc finger C2H2 type domain signature		transcript	taxon:13686	20060427	Prosite
Prosite	SiJWE06BBM2.scf	SiJWE06BBM2.scf		GO:0004497	Prosite:PS00086|Prosite:PDOC00081	IEA		P	Cytochrome P450 cysteine heme-iron ligand signature		transcript	taxon:13686	20060427	Prosite
Prosite	SiJWE06BBM2.scf	SiJWE06BBM2.scf		GO:0005506	Prosite:PS00086|Prosite:PDOC00081	IEA		P	Cytochrome P450 cysteine heme-iron ligand signature		transcript	taxon:13686	20060427	Prosite
Prosite	SiJWE06BBM2.scf	SiJWE06BBM2.scf		GO:0020037	Prosite:PS00086|Prosite:PDOC00081	IEA		P	Cytochrome P450 cysteine heme-iron ligand signature		transcript	taxon:13686	20060427	Prosite
Prosite	SiJWE06BBM2.scf	SiJWE06BBM2.scf		GO:0006118	Prosite:PS00086|Prosite:PDOC00081	IEA		P	Cytochrome P450 cysteine heme-iron ligand signature		transcript	taxon:13686	20060427	Prosite
Prosite	SiJWB07BBM2.scf	SiJWB07BBM2.scf		GO:0004252	Prosite:PS00134|Prosite:PDOC00124	IEA		P	Serine proteases, trypsin family, histidine active site		transcript	taxon:13686	20060427	Prosite
Prosite	SiJWB07BBM2.scf	SiJWB07BBM2.scf		GO:0006508	Prosite:PS00134|Prosite:PDOC00124	IEA		P	Serine proteases, trypsin family, histidine active site		transcript	taxon:13686	20060427	Prosite
Prosite	SiJWB07BBM2.scf	SiJWB07BBM2.scf		GO:0004252	Prosite:PS00135|Prosite:PDOC00124	IEA		P	Serine proteases, trypsin family, serine active site		transcript	taxon:13686	20060427	Prosite
Prosite	SiJWB07BBM2.scf	SiJWB07BBM2.scf		GO:0006508	Prosite:PS00135|Prosite:PDOC00124	IEA		P	Serine proteases, trypsin family, serine active site		transcript	taxon:13686	20060427	Prosite
Prosite	SiJWB01BCB2.scf	SiJWB01BCB2.scf		GO:0004672	Prosite:PS00107|Prosite:PDOC00100	IEA		P	Protein kinases ATP-binding region signature		transcript	taxon:13686	20060427	Prosite
Prosite	SiJWB01BCB2.scf	SiJWB01BCB2.scf		GO:0005524	Prosite:PS00107|Prosite:PDOC00100	IEA		P	Protein kinases ATP-binding region signature		transcript	taxon:13686	20060427	Prosite
Prosite	SiJWB01BCB2.scf	SiJWB01BCB2.scf		GO:0006468	Prosite:PS00107|Prosite:PDOC00100	IEA		P	Protein kinases ATP-binding region signature		transcript	taxon:13686	20060427	Prosite
Prosite	SiJWH09BCL2.scf	SiJWH09BCL2.scf		GO:0003676	Prosite:PS00028|Prosite:PDOC00028	IEA		P	Zinc finger C2H2 type domain signature		transcript	taxon:13686	20060427	Prosite
Prosite	SiJWH09BCL2.scf	SiJWH09BCL2.scf		GO:0008270	Prosite:PS00028|Prosite:PDOC00028	IEA		P	Zinc finger C2H2 type domain signature		transcript	taxon:13686	20060427	Prosite
Prosite	SiJWH09BCL2.scf	SiJWH09BCL2.scf		GO:0005634	Prosite:PS00028|Prosite:PDOC00028	IEA		P	Zinc finger C2H2 type domain signature		transcript	taxon:13686	20060427	Prosite
Prosite	SiJWG10BCO2.scf	SiJWG10BCO2.scf		GO:0004197	Prosite:PS00973|Prosite:PDOC00750	IEA		P	Ubiquitin carboxyl-terminal hydrolases family 2 signature 2		transcript	taxon:13686	20060427	Prosite
Prosite	SiJWG10BCO2.scf	SiJWG10BCO2.scf		GO:0004221	Prosite:PS00973|Prosite:PDOC00750	IEA		P	Ubiquitin carboxyl-terminal hydrolases family 2 signature 2		transcript	taxon:13686	20060427	Prosite
Prosite	SiJWG10BCO2.scf	SiJWG10BCO2.scf		GO:0006511	Prosite:PS00973|Prosite:PDOC00750	IEA		P	Ubiquitin carboxyl-terminal hydrolases family 2 signature 2		transcript	taxon:13686	20060427	Prosite
Prosite	SiJWH11BCZ2.scf	SiJWH11BCZ2.scf		GO:0003677	Prosite:PS00352|Prosite:PDOC00304	IEA		P	'Cold-shock' domain signature		transcript	taxon:13686	20060427	Prosite
Prosite	SiJWH11BCZ2.scf	SiJWH11BCZ2.scf		GO:0006355	Prosite:PS00352|Prosite:PDOC00304	IEA		P	'Cold-shock' domain signature		transcript	taxon:13686	20060427	Prosite
Prosite	SiJWD07BCZ2.scf	SiJWD07BCZ2.scf		GO:0004674	Prosite:PS00108|Prosite:PDOC00100	IEA		P	Serine/Threonine protein kinases active-site signature		transcript	taxon:13686	20060427	Prosite
Prosite	SiJWD07BCZ2.scf	SiJWD07BCZ2.scf		GO:0006468	Prosite:PS00108|Prosite:PDOC00100	IEA		P	Serine/Threonine protein kinases active-site signature		transcript	taxon:13686	20060427	Prosite
Prosite	SiJWE03BDL2.scf	SiJWE03BDL2.scf		GO:0003779	Prosite:PS00748|Prosite:PDOC00609	IEA		P	F-actin capping protein alpha subunit signature 1		transcript	taxon:13686	20060427	Prosite
Prosite	SiJWE03BDL2.scf	SiJWE03BDL2.scf		GO:0030036	Prosite:PS00748|Prosite:PDOC00609	IEA		P	F-actin capping protein alpha subunit signature 1		transcript	taxon:13686	20060427	Prosite
Prosite	SiJWE03BDL2.scf	SiJWE03BDL2.scf		GO:0008290	Prosite:PS00748|Prosite:PDOC00609	IEA		P	F-actin capping protein alpha subunit signature 1		transcript	taxon:13686	20060427	Prosite
Prosite	SiJWB05CAV.scf	SiJWB05CAV.scf		GO:0004749	Prosite:PS00114|Prosite:PDOC00105	IEA		P	Phosphoribosyl pyrophosphate synthetase signature		transcript	taxon:13686	20060427	Prosite
Prosite	SiJWB05CAV.scf	SiJWB05CAV.scf		GO:0016978	Prosite:PS00114|Prosite:PDOC00105	IEA		P	Phosphoribosyl pyrophosphate synthetase signature		transcript	taxon:13686	20060427	Prosite
Prosite	SiJWB05CAV.scf	SiJWB05CAV.scf		GO:0009156	Prosite:PS00114|Prosite:PDOC00105	IEA		P	Phosphoribosyl pyrophosphate synthetase signature		transcript	taxon:13686	20060427	Prosite
Prosite	SiJWE10CAK2.scf	SiJWE10CAK2.scf		GO:0008270	Prosite:PS00478|Prosite:PDOC00382	IEA		P	LIM zinc-binding domain signature		transcript	taxon:13686	20060427	Prosite
Prosite	SiJWF11CAC2.scf	SiJWF11CAC2.scf		GO:0016538	Prosite:PS00944|Prosite:PDOC00728	IEA		P	Cyclin-dependent kinases regulatory subunits signature 1		transcript	taxon:13686	20060427	Prosite
Prosite	SiJWF11CAC2.scf	SiJWF11CAC2.scf		GO:0007049	Prosite:PS00944|Prosite:PDOC00728	IEA		P	Cyclin-dependent kinases regulatory subunits signature 1		transcript	taxon:13686	20060427	Prosite
Prosite	SiJWF11CAC2.scf	SiJWF11CAC2.scf		GO:0016538	Prosite:PS00945|Prosite:PDOC00728	IEA		P	Cyclin-dependent kinases regulatory subunits signature 2		transcript	taxon:13686	20060427	Prosite
Prosite	SiJWF11CAC2.scf	SiJWF11CAC2.scf		GO:0007049	Prosite:PS00945|Prosite:PDOC00728	IEA		P	Cyclin-dependent kinases regulatory subunits signature 2		transcript	taxon:13686	20060427	Prosite
Prosite	SiJWG05CAC2.scf	SiJWG05CAC2.scf		GO:0008270	Prosite:PS00478|Prosite:PDOC00382	IEA		P	LIM zinc-binding domain signature		transcript	taxon:13686	20060427	Prosite
Prosite	SiJWG08CAK2.scf	SiJWG08CAK2.scf		GO:0004497	Prosite:PS00086|Prosite:PDOC00081	IEA		P	Cytochrome P450 cysteine heme-iron ligand signature		transcript	taxon:13686	20060427	Prosite
Prosite	SiJWG08CAK2.scf	SiJWG08CAK2.scf		GO:0005506	Prosite:PS00086|Prosite:PDOC00081	IEA		P	Cytochrome P450 cysteine heme-iron ligand signature		transcript	taxon:13686	20060427	Prosite
Prosite	SiJWG08CAK2.scf	SiJWG08CAK2.scf		GO:0020037	Prosite:PS00086|Prosite:PDOC00081	IEA		P	Cytochrome P450 cysteine heme-iron ligand signature		transcript	taxon:13686	20060427	Prosite
Prosite	SiJWG08CAK2.scf	SiJWG08CAK2.scf		GO:0006118	Prosite:PS00086|Prosite:PDOC00081	IEA		P	Cytochrome P450 cysteine heme-iron ligand signature		transcript	taxon:13686	20060427	Prosite
Prosite	SiJWD11CAF2.scf	SiJWD11CAF2.scf		GO:0004672	Prosite:PS00107|Prosite:PDOC00100	IEA		P	Protein kinases ATP-binding region signature		transcript	taxon:13686	20060427	Prosite
Prosite	SiJWD11CAF2.scf	SiJWD11CAF2.scf		GO:0005524	Prosite:PS00107|Prosite:PDOC00100	IEA		P	Protein kinases ATP-binding region signature		transcript	taxon:13686	20060427	Prosite
Prosite	SiJWD11CAF2.scf	SiJWD11CAF2.scf		GO:0006468	Prosite:PS00107|Prosite:PDOC00100	IEA		P	Protein kinases ATP-binding region signature		transcript	taxon:13686	20060427	Prosite
Prosite	SiJWA12CAO2.scf	SiJWA12CAO2.scf		GO:0016740	Prosite:PS00599|Prosite:PDOC00518	IEA		P	Aminotransferases class-II pyridoxal-phosphate attachment site		transcript	taxon:13686	20060427	Prosite
Prosite	SiJWA12CAO2.scf	SiJWA12CAO2.scf		GO:0008152	Prosite:PS00599|Prosite:PDOC00518	IEA		P	Aminotransferases class-II pyridoxal-phosphate attachment site		transcript	taxon:13686	20060427	Prosite
Prosite	SiJWD05CAO2.scf	SiJWD05CAO2.scf		GO:0016491	Prosite:PS00063|Prosite:PDOC00061	IEA		P	Aldo/keto reductase family putative active site signature		transcript	taxon:13686	20060427	Prosite
Prosite	SiJWD06CAT2.scf	SiJWD06CAT2.scf		GO:0004497	Prosite:PS00086|Prosite:PDOC00081	IEA		P	Cytochrome P450 cysteine heme-iron ligand signature		transcript	taxon:13686	20060427	Prosite
Prosite	SiJWD06CAT2.scf	SiJWD06CAT2.scf		GO:0005506	Prosite:PS00086|Prosite:PDOC00081	IEA		P	Cytochrome P450 cysteine heme-iron ligand signature		transcript	taxon:13686	20060427	Prosite
Prosite	SiJWD06CAT2.scf	SiJWD06CAT2.scf		GO:0020037	Prosite:PS00086|Prosite:PDOC00081	IEA		P	Cytochrome P450 cysteine heme-iron ligand signature		transcript	taxon:13686	20060427	Prosite
Prosite	SiJWD06CAT2.scf	SiJWD06CAT2.scf		GO:0006118	Prosite:PS00086|Prosite:PDOC00081	IEA		P	Cytochrome P450 cysteine heme-iron ligand signature		transcript	taxon:13686	20060427	Prosite
Prosite	SiJWD01BBSR2F05.scf	SiJWD01BBSR2F05.scf		GO:0005524	Prosite:PS00675|Prosite:PDOC00579	IEA		P	Sigma-54 interaction domain ATP-binding region A signature		transcript	taxon:13686	20060427	Prosite
Prosite	SiJWD01BBSR2F05.scf	SiJWD01BBSR2F05.scf		GO:0008134	Prosite:PS00675|Prosite:PDOC00579	IEA		P	Sigma-54 interaction domain ATP-binding region A signature		transcript	taxon:13686	20060427	Prosite
Prosite	SiJWD01BBSR2F05.scf	SiJWD01BBSR2F05.scf		GO:0006355	Prosite:PS00675|Prosite:PDOC00579	IEA		P	Sigma-54 interaction domain ATP-binding region A signature		transcript	taxon:13686	20060427	Prosite
Prosite	SiJWD01BBSR2F05.scf	SiJWD01BBSR2F05.scf		GO:0005622	Prosite:PS00675|Prosite:PDOC00579	IEA		P	Sigma-54 interaction domain ATP-binding region A signature		transcript	taxon:13686	20060427	Prosite
Prosite	SiJWE11BDHR4G07.scf	SiJWE11BDHR4G07.scf		GO:0004812	Prosite:PS00178|Prosite:PDOC00161	IEA		P	Aminoacyl-transfer RNA synthetases class-I signature		transcript	taxon:13686	20060427	Prosite
Prosite	SiJWE11BDHR4G07.scf	SiJWE11BDHR4G07.scf		GO:0005524	Prosite:PS00178|Prosite:PDOC00161	IEA		P	Aminoacyl-transfer RNA synthetases class-I signature		transcript	taxon:13686	20060427	Prosite
Prosite	SiJWE11BDHR4G07.scf	SiJWE11BDHR4G07.scf		GO:0006418	Prosite:PS00178|Prosite:PDOC00161	IEA		P	Aminoacyl-transfer RNA synthetases class-I signature		transcript	taxon:13686	20060427	Prosite
Prosite	SiJWH08CAW.scf	SiJWH08CAW.scf		GO:0003677	Prosite:PS00352|Prosite:PDOC00304	IEA		P	'Cold-shock' domain signature		transcript	taxon:13686	20060427	Prosite
Prosite	SiJWH08CAW.scf	SiJWH08CAW.scf		GO:0006355	Prosite:PS00352|Prosite:PDOC00304	IEA		P	'Cold-shock' domain signature		transcript	taxon:13686	20060427	Prosite
Prosite	SiJWD04BCH2.scf	SiJWD04BCH2.scf		GO:0006118	Prosite:PS00559|Prosite:PDOC00484	IEA		P	Eukaryotic molybdopterin oxidoreductases signature		transcript	taxon:13686	20060427	Prosite
Prosite	SiJWF10BCW2.scf	SiJWF10BCW2.scf		GO:0005524	Prosite:PS00674|Prosite:PDOC00572	IEA		P	AAA-protein family signature		transcript	taxon:13686	20060427	Prosite
Prosite	SiJWF09AAA2.scf	SiJWF09AAA2.scf		GO:0006118	Prosite:PS00559|Prosite:PDOC00484	IEA		P	Eukaryotic molybdopterin oxidoreductases signature		transcript	taxon:13686	20060427	Prosite
Prosite	SiJWC02AAC2.scf	SiJWC02AAC2.scf		GO:0006457	Prosite:PS00170|Prosite:PDOC00154	IEA		P	Cyclophilin-type peptidyl-prolyl cis-trans isomerase signature		transcript	taxon:13686	20060427	Prosite
Prosite	SiJWB10ABP2.scf	SiJWB10ABP2.scf		GO:0003676	Prosite:PS00028|Prosite:PDOC00028	IEA		P	Zinc finger C2H2 type domain signature		transcript	taxon:13686	20060427	Prosite
Prosite	SiJWB10ABP2.scf	SiJWB10ABP2.scf		GO:0008270	Prosite:PS00028|Prosite:PDOC00028	IEA		P	Zinc finger C2H2 type domain signature		transcript	taxon:13686	20060427	Prosite
Prosite	SiJWB10ABP2.scf	SiJWB10ABP2.scf		GO:0005634	Prosite:PS00028|Prosite:PDOC00028	IEA		P	Zinc finger C2H2 type domain signature		transcript	taxon:13686	20060427	Prosite
Prosite	SiJWE11BAA2.scf	SiJWE11BAA2.scf		GO:0004672	Prosite:PS00107|Prosite:PDOC00100	IEA		P	Protein kinases ATP-binding region signature		transcript	taxon:13686	20060427	Prosite
Prosite	SiJWE11BAA2.scf	SiJWE11BAA2.scf		GO:0005524	Prosite:PS00107|Prosite:PDOC00100	IEA		P	Protein kinases ATP-binding region signature		transcript	taxon:13686	20060427	Prosite
Prosite	SiJWE11BAA2.scf	SiJWE11BAA2.scf		GO:0006468	Prosite:PS00107|Prosite:PDOC00100	IEA		P	Protein kinases ATP-binding region signature		transcript	taxon:13686	20060427	Prosite
Prosite	SiJWE11BAA2.scf	SiJWE11BAA2.scf		GO:0004674	Prosite:PS00108|Prosite:PDOC00100	IEA		P	Serine/Threonine protein kinases active-site signature		transcript	taxon:13686	20060427	Prosite
Prosite	SiJWE11BAA2.scf	SiJWE11BAA2.scf		GO:0006468	Prosite:PS00108|Prosite:PDOC00100	IEA		P	Serine/Threonine protein kinases active-site signature		transcript	taxon:13686	20060427	Prosite
Prosite	SiJWA07BAA2.scf	SiJWA07BAA2.scf		GO:0008450	Prosite:PS01016|Prosite:PDOC00779	IEA		P	Glycoprotease family signature		transcript	taxon:13686	20060427	Prosite
Prosite	SiJWA07BAA2.scf	SiJWA07BAA2.scf		GO:0006508	Prosite:PS01016|Prosite:PDOC00779	IEA		P	Glycoprotease family signature		transcript	taxon:13686	20060427	Prosite
Prosite	SiJWF03BDX.scf	SiJWF03BDX.scf		GO:0005525	Prosite:PS00301|Prosite:PDOC00273	IEA		P	GTP-binding elongation factors signature		transcript	taxon:13686	20060427	Prosite
Prosite	SiJWF03BDX.scf	SiJWF03BDX.scf		GO:0006412	Prosite:PS00301|Prosite:PDOC00273	IEA		P	GTP-binding elongation factors signature		transcript	taxon:13686	20060427	Prosite
Prosite	SiJWC06BDZ.scf	SiJWC06BDZ.scf		GO:0003677	Prosite:PS00037|Prosite:PDOC00037	IEA		P	Myb DNA-binding domain repeat signature 1		transcript	taxon:13686	20060427	Prosite
Prosite	SiJWC06BDZ.scf	SiJWC06BDZ.scf		GO:0005634	Prosite:PS00037|Prosite:PDOC00037	IEA		P	Myb DNA-binding domain repeat signature 1		transcript	taxon:13686	20060427	Prosite
Prosite	SiJWC06BDZ.scf	SiJWC06BDZ.scf		GO:0003677	Prosite:PS00334|Prosite:PDOC00037	IEA		P	Myb DNA-binding domain repeat signature 2		transcript	taxon:13686	20060427	Prosite
Prosite	SiJWC06BDZ.scf	SiJWC06BDZ.scf		GO:0005634	Prosite:PS00334|Prosite:PDOC00037	IEA		P	Myb DNA-binding domain repeat signature 2		transcript	taxon:13686	20060427	Prosite
Prosite	SiJWC07BEA.scf	SiJWC07BEA.scf		GO:0008237	Prosite:PS00142|Prosite:PDOC00129	IEA		P	Neutral zinc metallopeptidases, zinc-binding region signature		transcript	taxon:13686	20060427	Prosite
Prosite	SiJWC07BEA.scf	SiJWC07BEA.scf		GO:0008270	Prosite:PS00142|Prosite:PDOC00129	IEA		P	Neutral zinc metallopeptidases, zinc-binding region signature		transcript	taxon:13686	20060427	Prosite
Prosite	SiJWC07BEA.scf	SiJWC07BEA.scf		GO:0006508	Prosite:PS00142|Prosite:PDOC00129	IEA		P	Neutral zinc metallopeptidases, zinc-binding region signature		transcript	taxon:13686	20060427	Prosite
Prosite	SiJWF12CAX.scf	SiJWF12CAX.scf		GO:0000287	Prosite:PS00387|Prosite:PDOC00325	IEA		P	Inorganic pyrophosphatase signature		transcript	taxon:13686	20060427	Prosite
Prosite	SiJWF12CAX.scf	SiJWF12CAX.scf		GO:0004427	Prosite:PS00387|Prosite:PDOC00325	IEA		P	Inorganic pyrophosphatase signature		transcript	taxon:13686	20060427	Prosite
Prosite	SiJWF12CAX.scf	SiJWF12CAX.scf		GO:0006796	Prosite:PS00387|Prosite:PDOC00325	IEA		P	Inorganic pyrophosphatase signature		transcript	taxon:13686	20060427	Prosite
Prosite	SiJWF12CAX.scf	SiJWF12CAX.scf		GO:0005737	Prosite:PS00387|Prosite:PDOC00325	IEA		P	Inorganic pyrophosphatase signature		transcript	taxon:13686	20060427	Prosite
Prosite	SiJWF04ABE.tag5_F04_12.scf	SiJWF04ABE.tag5_F04_12.scf		GO:0003735	Prosite:PS00628|Prosite:PDOC00546	IEA		P	Ribosomal protein S19e signature		transcript	taxon:13686	20060427	Prosite
Prosite	SiJWF04ABE.tag5_F04_12.scf	SiJWF04ABE.tag5_F04_12.scf		GO:0006412	Prosite:PS00628|Prosite:PDOC00546	IEA		P	Ribosomal protein S19e signature		transcript	taxon:13686	20060427	Prosite
Prosite	SiJWF04ABE.tag5_F04_12.scf	SiJWF04ABE.tag5_F04_12.scf		GO:0005622	Prosite:PS00628|Prosite:PDOC00546	IEA		P	Ribosomal protein S19e signature		transcript	taxon:13686	20060427	Prosite
Prosite	SiJWF04ABE.tag5_F04_12.scf	SiJWF04ABE.tag5_F04_12.scf		GO:0005840	Prosite:PS00628|Prosite:PDOC00546	IEA		P	Ribosomal protein S19e signature		transcript	taxon:13686	20060427	Prosite
Prosite	SiJWC09AAM.scf	SiJWC09AAM.scf		GO:0008237	Prosite:PS00142|Prosite:PDOC00129	IEA		P	Neutral zinc metallopeptidases, zinc-binding region signature		transcript	taxon:13686	20060427	Prosite
Prosite	SiJWC09AAM.scf	SiJWC09AAM.scf		GO:0008270	Prosite:PS00142|Prosite:PDOC00129	IEA		P	Neutral zinc metallopeptidases, zinc-binding region signature		transcript	taxon:13686	20060427	Prosite
Prosite	SiJWC09AAM.scf	SiJWC09AAM.scf		GO:0006508	Prosite:PS00142|Prosite:PDOC00129	IEA		P	Neutral zinc metallopeptidases, zinc-binding region signature		transcript	taxon:13686	20060427	Prosite
Prosite	SiJWA10AAM.scf	SiJWA10AAM.scf		GO:0003700	Prosite:PS00658|Prosite:PDOC00564	IEA		P	Fork head domain signature 2		transcript	taxon:13686	20060427	Prosite
Prosite	SiJWA10AAM.scf	SiJWA10AAM.scf		GO:0043565	Prosite:PS00658|Prosite:PDOC00564	IEA		P	Fork head domain signature 2		transcript	taxon:13686	20060427	Prosite
Prosite	SiJWA10AAM.scf	SiJWA10AAM.scf		GO:0006355	Prosite:PS00658|Prosite:PDOC00564	IEA		P	Fork head domain signature 2		transcript	taxon:13686	20060427	Prosite
Prosite	SiJWA10AAM.scf	SiJWA10AAM.scf		GO:0005634	Prosite:PS00658|Prosite:PDOC00564	IEA		P	Fork head domain signature 2		transcript	taxon:13686	20060427	Prosite
Prosite	SiJWD06BBA.tag5_D02_08.scf	SiJWD06BBA.tag5_D02_08.scf		GO:0004182	Prosite:PS00132|Prosite:PDOC00123	IEA		P	Zinc carboxypeptidases, zinc-binding region 1 signature		transcript	taxon:13686	20060427	Prosite
Prosite	SiJWD06BBA.tag5_D02_08.scf	SiJWD06BBA.tag5_D02_08.scf		GO:0006508	Prosite:PS00132|Prosite:PDOC00123	IEA		P	Zinc carboxypeptidases, zinc-binding region 1 signature		transcript	taxon:13686	20060427	Prosite
Prosite	SiJWA04BCP.scf	SiJWA04BCP.scf		GO:0004197	Prosite:PS00139|Prosite:PDOC00126	IEA		P	Eukaryotic thiol (cysteine) proteases cysteine active site		transcript	taxon:13686	20060427	Prosite
Prosite	SiJWA04BCP.scf	SiJWA04BCP.scf		GO:0006508	Prosite:PS00139|Prosite:PDOC00126	IEA		P	Eukaryotic thiol (cysteine) proteases cysteine active site		transcript	taxon:13686	20060427	Prosite
Prosite	SI.CL.0.cl.033.Contig1	SI.CL.0.cl.033.Contig1		GO:0003735	Prosite:PS00049|Prosite:PDOC00048	IEA		P	Ribosomal protein L14 signature		transcript	taxon:13686	20060427	Prosite
Prosite	SI.CL.0.cl.033.Contig1	SI.CL.0.cl.033.Contig1		GO:0006412	Prosite:PS00049|Prosite:PDOC00048	IEA		P	Ribosomal protein L14 signature		transcript	taxon:13686	20060427	Prosite
Prosite	SI.CL.0.cl.033.Contig1	SI.CL.0.cl.033.Contig1		GO:0005622	Prosite:PS00049|Prosite:PDOC00048	IEA		P	Ribosomal protein L14 signature		transcript	taxon:13686	20060427	Prosite
Prosite	SI.CL.0.cl.033.Contig1	SI.CL.0.cl.033.Contig1		GO:0005840	Prosite:PS00049|Prosite:PDOC00048	IEA		P	Ribosomal protein L14 signature		transcript	taxon:13686	20060427	Prosite
Prosite	SI.CL.0.cl.034.Contig1	SI.CL.0.cl.034.Contig1		GO:0003682	Prosite:PS00598|Prosite:PDOC00517	IEA		P	Chromo domain signature		transcript	taxon:13686	20060427	Prosite
Prosite	SI.CL.0.cl.034.Contig1	SI.CL.0.cl.034.Contig1		GO:0006333	Prosite:PS00598|Prosite:PDOC00517	IEA		P	Chromo domain signature		transcript	taxon:13686	20060427	Prosite
Prosite	SI.CL.0.cl.034.Contig1	SI.CL.0.cl.034.Contig1		GO:0000785	Prosite:PS00598|Prosite:PDOC00517	IEA		P	Chromo domain signature		transcript	taxon:13686	20060427	Prosite
Prosite	SI.CL.0.cl.034.Contig1	SI.CL.0.cl.034.Contig1		GO:0005634	Prosite:PS00598|Prosite:PDOC00517	IEA		P	Chromo domain signature		transcript	taxon:13686	20060427	Prosite
Prosite	SI.CL.0.cl.034.Contig2	SI.CL.0.cl.034.Contig2		GO:0003682	Prosite:PS00598|Prosite:PDOC00517	IEA		P	Chromo domain signature		transcript	taxon:13686	20060427	Prosite
Prosite	SI.CL.0.cl.034.Contig2	SI.CL.0.cl.034.Contig2		GO:0006333	Prosite:PS00598|Prosite:PDOC00517	IEA		P	Chromo domain signature		transcript	taxon:13686	20060427	Prosite
Prosite	SI.CL.0.cl.034.Contig2	SI.CL.0.cl.034.Contig2		GO:0000785	Prosite:PS00598|Prosite:PDOC00517	IEA		P	Chromo domain signature		transcript	taxon:13686	20060427	Prosite
Prosite	SI.CL.0.cl.034.Contig2	SI.CL.0.cl.034.Contig2		GO:0005634	Prosite:PS00598|Prosite:PDOC00517	IEA		P	Chromo domain signature		transcript	taxon:13686	20060427	Prosite
Prosite	SI.CL.0.cl.040.Contig1	SI.CL.0.cl.040.Contig1		GO:0005509	Prosite:PS00018|Prosite:PDOC00018	IEA		P	EF-hand calcium-binding domain		transcript	taxon:13686	20060427	Prosite
Prosite	SI.CL.0.cl.045.Contig1	SI.CL.0.cl.045.Contig1		GO:0003735	Prosite:PS01144|Prosite:PDOC00881	IEA		P	Ribosomal protein L31e signature		transcript	taxon:13686	20060427	Prosite
Prosite	SI.CL.0.cl.045.Contig1	SI.CL.0.cl.045.Contig1		GO:0006412	Prosite:PS01144|Prosite:PDOC00881	IEA		P	Ribosomal protein L31e signature		transcript	taxon:13686	20060427	Prosite
Prosite	SI.CL.0.cl.045.Contig1	SI.CL.0.cl.045.Contig1		GO:0005622	Prosite:PS01144|Prosite:PDOC00881	IEA		P	Ribosomal protein L31e signature		transcript	taxon:13686	20060427	Prosite
Prosite	SI.CL.0.cl.045.Contig1	SI.CL.0.cl.045.Contig1		GO:0005840	Prosite:PS01144|Prosite:PDOC00881	IEA		P	Ribosomal protein L31e signature		transcript	taxon:13686	20060427	Prosite
Prosite	SI.CL.0.cl.052.Contig1	SI.CL.0.cl.052.Contig1		GO:0003723	Prosite:PS00813|Prosite:PDOC00641	IEA		P	Eukaryotic initiation factor 4E signature		transcript	taxon:13686	20060427	Prosite
Prosite	SI.CL.0.cl.052.Contig1	SI.CL.0.cl.052.Contig1		GO:0003743	Prosite:PS00813|Prosite:PDOC00641	IEA		P	Eukaryotic initiation factor 4E signature		transcript	taxon:13686	20060427	Prosite
Prosite	SI.CL.0.cl.052.Contig1	SI.CL.0.cl.052.Contig1		GO:0006413	Prosite:PS00813|Prosite:PDOC00641	IEA		P	Eukaryotic initiation factor 4E signature		transcript	taxon:13686	20060427	Prosite
Prosite	SI.CL.0.cl.052.Contig1	SI.CL.0.cl.052.Contig1		GO:0005737	Prosite:PS00813|Prosite:PDOC00641	IEA		P	Eukaryotic initiation factor 4E signature		transcript	taxon:13686	20060427	Prosite
Prosite	SI.CL.0.cl.064.Contig1	SI.CL.0.cl.064.Contig1		GO:0003735	Prosite:PS00359|Prosite:PDOC00310	IEA		P	Ribosomal protein L11 signature		transcript	taxon:13686	20060427	Prosite
Prosite	SI.CL.0.cl.064.Contig1	SI.CL.0.cl.064.Contig1		GO:0006412	Prosite:PS00359|Prosite:PDOC00310	IEA		P	Ribosomal protein L11 signature		transcript	taxon:13686	20060427	Prosite
Prosite	SI.CL.0.cl.064.Contig1	SI.CL.0.cl.064.Contig1		GO:0005622	Prosite:PS00359|Prosite:PDOC00310	IEA		P	Ribosomal protein L11 signature		transcript	taxon:13686	20060427	Prosite
Prosite	SI.CL.0.cl.064.Contig1	SI.CL.0.cl.064.Contig1		GO:0005840	Prosite:PS00359|Prosite:PDOC00310	IEA		P	Ribosomal protein L11 signature		transcript	taxon:13686	20060427	Prosite
Prosite	SI.CL.0.cl.076.Contig1	SI.CL.0.cl.076.Contig1		GO:0003824	Prosite:PS00399|Prosite:PDOC00335	IEA		P	ATP-citrate lyase / succinyl-CoA ligases family active site		transcript	taxon:13686	20060427	Prosite
Prosite	SI.CL.0.cl.076.Contig1	SI.CL.0.cl.076.Contig1		GO:0008152	Prosite:PS00399|Prosite:PDOC00335	IEA		P	ATP-citrate lyase / succinyl-CoA ligases family active site		transcript	taxon:13686	20060427	Prosite
Prosite	SI.CL.0.cl.077.Contig1	SI.CL.0.cl.077.Contig1		GO:0016491	Prosite:PS00061|Prosite:PDOC00060	IEA		P	Short-chain dehydrogenases/reductases family signature		transcript	taxon:13686	20060427	Prosite
Prosite	SI.CL.0.cl.077.Contig1	SI.CL.0.cl.077.Contig1		GO:0008152	Prosite:PS00061|Prosite:PDOC00060	IEA		P	Short-chain dehydrogenases/reductases family signature		transcript	taxon:13686	20060427	Prosite
Prosite	SI.CL.0.cl.083.Contig1	SI.CL.0.cl.083.Contig1		GO:0005509	Prosite:PS00018|Prosite:PDOC00018	IEA		P	EF-hand calcium-binding domain		transcript	taxon:13686	20060427	Prosite
Prosite	SI.CL.0.cl.089.Contig1	SI.CL.0.cl.089.Contig1		GO:0016491	Prosite:PS00061|Prosite:PDOC00060	IEA		P	Short-chain dehydrogenases/reductases family signature		transcript	taxon:13686	20060427	Prosite
Prosite	SI.CL.0.cl.089.Contig1	SI.CL.0.cl.089.Contig1		GO:0008152	Prosite:PS00061|Prosite:PDOC00060	IEA		P	Short-chain dehydrogenases/reductases family signature		transcript	taxon:13686	20060427	Prosite
Prosite	SI.CL.0.cl.089.Contig2	SI.CL.0.cl.089.Contig2		GO:0016491	Prosite:PS00061|Prosite:PDOC00060	IEA		P	Short-chain dehydrogenases/reductases family signature		transcript	taxon:13686	20060427	Prosite
Prosite	SI.CL.0.cl.089.Contig2	SI.CL.0.cl.089.Contig2		GO:0008152	Prosite:PS00061|Prosite:PDOC00060	IEA		P	Short-chain dehydrogenases/reductases family signature		transcript	taxon:13686	20060427	Prosite
Prosite	SI.CL.0.cl.098.Contig1	SI.CL.0.cl.098.Contig1		GO:0003735	Prosite:PS00948|Prosite:PDOC00730	IEA		P	Ribosomal protein S7e signature		transcript	taxon:13686	20060427	Prosite
Prosite	SI.CL.0.cl.098.Contig1	SI.CL.0.cl.098.Contig1		GO:0006412	Prosite:PS00948|Prosite:PDOC00730	IEA		P	Ribosomal protein S7e signature		transcript	taxon:13686	20060427	Prosite
Prosite	SI.CL.0.cl.098.Contig1	SI.CL.0.cl.098.Contig1		GO:0005622	Prosite:PS00948|Prosite:PDOC00730	IEA		P	Ribosomal protein S7e signature		transcript	taxon:13686	20060427	Prosite
Prosite	SI.CL.0.cl.098.Contig1	SI.CL.0.cl.098.Contig1		GO:0005840	Prosite:PS00948|Prosite:PDOC00730	IEA		P	Ribosomal protein S7e signature		transcript	taxon:13686	20060427	Prosite
Prosite	SI.CL.1.cl.107.Contig1	SI.CL.1.cl.107.Contig1		GO:0008237	Prosite:PS00142|Prosite:PDOC00129	IEA		P	Neutral zinc metallopeptidases, zinc-binding region signature		transcript	taxon:13686	20060427	Prosite
Prosite	SI.CL.1.cl.107.Contig1	SI.CL.1.cl.107.Contig1		GO:0008270	Prosite:PS00142|Prosite:PDOC00129	IEA		P	Neutral zinc metallopeptidases, zinc-binding region signature		transcript	taxon:13686	20060427	Prosite
Prosite	SI.CL.1.cl.107.Contig1	SI.CL.1.cl.107.Contig1		GO:0006508	Prosite:PS00142|Prosite:PDOC00129	IEA		P	Neutral zinc metallopeptidases, zinc-binding region signature		transcript	taxon:13686	20060427	Prosite
Prosite	SI.CL.1.cl.128.Contig1	SI.CL.1.cl.128.Contig1		GO:0016491	Prosite:PS00798|Prosite:PDOC00061	IEA		P	Aldo/keto reductase family signature 1		transcript	taxon:13686	20060427	Prosite
Prosite	SI.CL.1.cl.128.Contig1	SI.CL.1.cl.128.Contig1		GO:0016491	Prosite:PS00062|Prosite:PDOC00061	IEA		P	Aldo/keto reductase family signature 2		transcript	taxon:13686	20060427	Prosite
Prosite	SI.CL.1.cl.128.Contig1	SI.CL.1.cl.128.Contig1		GO:0016491	Prosite:PS00063|Prosite:PDOC00061	IEA		P	Aldo/keto reductase family putative active site signature		transcript	taxon:13686	20060427	Prosite
Prosite	SI.CL.1.cl.141.Contig1	SI.CL.1.cl.141.Contig1		GO:0003735	Prosite:PS00700|Prosite:PDOC00454	IEA		P	Ribosomal protein L6 signature 2		transcript	taxon:13686	20060427	Prosite
Prosite	SI.CL.1.cl.141.Contig1	SI.CL.1.cl.141.Contig1		GO:0006412	Prosite:PS00700|Prosite:PDOC00454	IEA		P	Ribosomal protein L6 signature 2		transcript	taxon:13686	20060427	Prosite
Prosite	SI.CL.1.cl.141.Contig1	SI.CL.1.cl.141.Contig1		GO:0005622	Prosite:PS00700|Prosite:PDOC00454	IEA		P	Ribosomal protein L6 signature 2		transcript	taxon:13686	20060427	Prosite
Prosite	SI.CL.1.cl.141.Contig1	SI.CL.1.cl.141.Contig1		GO:0005840	Prosite:PS00700|Prosite:PDOC00454	IEA		P	Ribosomal protein L6 signature 2		transcript	taxon:13686	20060427	Prosite
Prosite	SI.CL.1.cl.159.Contig1	SI.CL.1.cl.159.Contig1		GO:0004602	Prosite:PS00460|Prosite:PDOC00396	IEA		P	Glutathione peroxidases active site		transcript	taxon:13686	20060427	Prosite
Prosite	SI.CL.1.cl.159.Contig1	SI.CL.1.cl.159.Contig1		GO:0006979	Prosite:PS00460|Prosite:PDOC00396	IEA		P	Glutathione peroxidases active site		transcript	taxon:13686	20060427	Prosite
Prosite	SI.CL.1.cl.159.Contig1	SI.CL.1.cl.159.Contig1		GO:0004602	Prosite:PS00763|Prosite:PDOC00396	IEA		P	Glutathione peroxidases signature 2		transcript	taxon:13686	20060427	Prosite
Prosite	SI.CL.1.cl.159.Contig1	SI.CL.1.cl.159.Contig1		GO:0006979	Prosite:PS00763|Prosite:PDOC00396	IEA		P	Glutathione peroxidases signature 2		transcript	taxon:13686	20060427	Prosite
Prosite	SI.CL.1.cl.194.Contig3	SI.CL.1.cl.194.Contig3		GO:0006464	Prosite:PS00299|Prosite:PDOC00271	IEA		P	Ubiquitin domain signature		transcript	taxon:13686	20060427	Prosite
Prosite	SI.CL.2.cl.204.Contig1	SI.CL.2.cl.204.Contig1		GO:0003824	Prosite:PS00105|Prosite:PDOC00098	IEA		P	Aminotransferases class-I pyridoxal-phosphate attachment site		transcript	taxon:13686	20060427	Prosite
Prosite	SI.CL.2.cl.204.Contig1	SI.CL.2.cl.204.Contig1		GO:0009058	Prosite:PS00105|Prosite:PDOC00098	IEA		P	Aminotransferases class-I pyridoxal-phosphate attachment site		transcript	taxon:13686	20060427	Prosite
Prosite	SI.CL.2.cl.210.Contig1	SI.CL.2.cl.210.Contig1		GO:0003735	Prosite:PS01189|Prosite:PDOC00915	IEA		P	Ribosomal protein S12e signature		transcript	taxon:13686	20060427	Prosite
Prosite	SI.CL.2.cl.210.Contig1	SI.CL.2.cl.210.Contig1		GO:0006412	Prosite:PS01189|Prosite:PDOC00915	IEA		P	Ribosomal protein S12e signature		transcript	taxon:13686	20060427	Prosite
Prosite	SI.CL.2.cl.210.Contig1	SI.CL.2.cl.210.Contig1		GO:0005622	Prosite:PS01189|Prosite:PDOC00915	IEA		P	Ribosomal protein S12e signature		transcript	taxon:13686	20060427	Prosite
Prosite	SI.CL.2.cl.210.Contig1	SI.CL.2.cl.210.Contig1		GO:0005840	Prosite:PS01189|Prosite:PDOC00915	IEA		P	Ribosomal protein S12e signature		transcript	taxon:13686	20060427	Prosite
Prosite	SI.CL.2.cl.219.Contig1	SI.CL.2.cl.219.Contig1		GO:0042302	Prosite:PS00233|Prosite:PDOC00206	IEA		P	Chitin-binding type R&R domain signature		transcript	taxon:13686	20060427	Prosite
Prosite	SI.CL.2.cl.227.Contig1	SI.CL.2.cl.227.Contig1		GO:0003677	Prosite:PS01110|Prosite:PDOC00854	IEA		P	RNA polymerases H / 23 Kd subunits signature		transcript	taxon:13686	20060427	Prosite
Prosite	SI.CL.2.cl.227.Contig1	SI.CL.2.cl.227.Contig1		GO:0003899	Prosite:PS01110|Prosite:PDOC00854	IEA		P	RNA polymerases H / 23 Kd subunits signature		transcript	taxon:13686	20060427	Prosite
Prosite	SI.CL.2.cl.227.Contig1	SI.CL.2.cl.227.Contig1		GO:0006350	Prosite:PS01110|Prosite:PDOC00854	IEA		P	RNA polymerases H / 23 Kd subunits signature		transcript	taxon:13686	20060427	Prosite
Prosite	SI.CL.2.cl.229.Contig1	SI.CL.2.cl.229.Contig1		GO:0004129	Prosite:PS01329|Prosite:PDOC01032	IEA		P	Cytochrome c oxidase subunit VIa signature		transcript	taxon:13686	20060427	Prosite
Prosite	SI.CL.2.cl.229.Contig1	SI.CL.2.cl.229.Contig1		GO:0006118	Prosite:PS01329|Prosite:PDOC01032	IEA		P	Cytochrome c oxidase subunit VIa signature		transcript	taxon:13686	20060427	Prosite
Prosite	SI.CL.2.cl.229.Contig1	SI.CL.2.cl.229.Contig1		GO:0005740	Prosite:PS01329|Prosite:PDOC01032	IEA		P	Cytochrome c oxidase subunit VIa signature		transcript	taxon:13686	20060427	Prosite
Prosite	SI.CL.2.cl.234.Contig1	SI.CL.2.cl.234.Contig1		GO:0003735	Prosite:PS01105|Prosite:PDOC00849	IEA		P	Ribosomal protein L35Ae signature		transcript	taxon:13686	20060427	Prosite
Prosite	SI.CL.2.cl.234.Contig1	SI.CL.2.cl.234.Contig1		GO:0006412	Prosite:PS01105|Prosite:PDOC00849	IEA		P	Ribosomal protein L35Ae signature		transcript	taxon:13686	20060427	Prosite
Prosite	SI.CL.2.cl.234.Contig1	SI.CL.2.cl.234.Contig1		GO:0005622	Prosite:PS01105|Prosite:PDOC00849	IEA		P	Ribosomal protein L35Ae signature		transcript	taxon:13686	20060427	Prosite
Prosite	SI.CL.2.cl.234.Contig1	SI.CL.2.cl.234.Contig1		GO:0005840	Prosite:PS01105|Prosite:PDOC00849	IEA		P	Ribosomal protein L35Ae signature		transcript	taxon:13686	20060427	Prosite
Prosite	SI.CL.2.cl.236.Contig1	SI.CL.2.cl.236.Contig1		GO:0003874	Prosite:PS00987|Prosite:PDOC00759	IEA		P	6-pyruvoyl tetrahydropterin synthase signature 1		transcript	taxon:13686	20060427	Prosite
Prosite	SI.CL.2.cl.236.Contig1	SI.CL.2.cl.236.Contig1		GO:0006729	Prosite:PS00987|Prosite:PDOC00759	IEA		P	6-pyruvoyl tetrahydropterin synthase signature 1		transcript	taxon:13686	20060427	Prosite
Prosite	SI.CL.2.cl.249.Contig1	SI.CL.2.cl.249.Contig1		GO:0004497	Prosite:PS00086|Prosite:PDOC00081	IEA		P	Cytochrome P450 cysteine heme-iron ligand signature		transcript	taxon:13686	20060427	Prosite
Prosite	SI.CL.2.cl.249.Contig1	SI.CL.2.cl.249.Contig1		GO:0005506	Prosite:PS00086|Prosite:PDOC00081	IEA		P	Cytochrome P450 cysteine heme-iron ligand signature		transcript	taxon:13686	20060427	Prosite
Prosite	SI.CL.2.cl.249.Contig1	SI.CL.2.cl.249.Contig1		GO:0020037	Prosite:PS00086|Prosite:PDOC00081	IEA		P	Cytochrome P450 cysteine heme-iron ligand signature		transcript	taxon:13686	20060427	Prosite
Prosite	SI.CL.2.cl.249.Contig1	SI.CL.2.cl.249.Contig1		GO:0006118	Prosite:PS00086|Prosite:PDOC00081	IEA		P	Cytochrome P450 cysteine heme-iron ligand signature		transcript	taxon:13686	20060427	Prosite
Prosite	SI.CL.2.cl.257.Contig1	SI.CL.2.cl.257.Contig1		GO:0016740	Prosite:PS00103|Prosite:PDOC00096	IEA		P	Purine/pyrimidine phosphoribosyl transferases signature		transcript	taxon:13686	20060427	Prosite
Prosite	SI.CL.2.cl.258.Contig1	SI.CL.2.cl.258.Contig1		GO:0005509	Prosite:PS00018|Prosite:PDOC00018	IEA		P	EF-hand calcium-binding domain		transcript	taxon:13686	20060427	Prosite
Prosite	SI.CL.2.cl.272.Contig1	SI.CL.2.cl.272.Contig1		GO:0006886	Prosite:PS00581|Prosite:PDOC00196	IEA		P	Clathrin light chain signature 2		transcript	taxon:13686	20060427	Prosite
Prosite	SI.CL.2.cl.272.Contig1	SI.CL.2.cl.272.Contig1		GO:0030125	Prosite:PS00581|Prosite:PDOC00196	IEA		P	Clathrin light chain signature 2		transcript	taxon:13686	20060427	Prosite
Prosite	SI.CL.2.cl.273.Contig1	SI.CL.2.cl.273.Contig1		GO:0003746	Prosite:PS00824|Prosite:PDOC00648	IEA		P	Elongation factor 1 beta/beta'/delta chain signature 1		transcript	taxon:13686	20060427	Prosite
Prosite	SI.CL.2.cl.273.Contig1	SI.CL.2.cl.273.Contig1		GO:0006414	Prosite:PS00824|Prosite:PDOC00648	IEA		P	Elongation factor 1 beta/beta'/delta chain signature 1		transcript	taxon:13686	20060427	Prosite
Prosite	SI.CL.2.cl.273.Contig1	SI.CL.2.cl.273.Contig1		GO:0005853	Prosite:PS00824|Prosite:PDOC00648	IEA		P	Elongation factor 1 beta/beta'/delta chain signature 1		transcript	taxon:13686	20060427	Prosite
Prosite	SI.CL.2.cl.273.Contig2	SI.CL.2.cl.273.Contig2		GO:0003746	Prosite:PS00824|Prosite:PDOC00648	IEA		P	Elongation factor 1 beta/beta'/delta chain signature 1		transcript	taxon:13686	20060427	Prosite
Prosite	SI.CL.2.cl.273.Contig2	SI.CL.2.cl.273.Contig2		GO:0006414	Prosite:PS00824|Prosite:PDOC00648	IEA		P	Elongation factor 1 beta/beta'/delta chain signature 1		transcript	taxon:13686	20060427	Prosite
Prosite	SI.CL.2.cl.273.Contig2	SI.CL.2.cl.273.Contig2		GO:0005853	Prosite:PS00824|Prosite:PDOC00648	IEA		P	Elongation factor 1 beta/beta'/delta chain signature 1		transcript	taxon:13686	20060427	Prosite
Prosite	SI.CL.2.cl.284.Contig1	SI.CL.2.cl.284.Contig1		GO:0005524	Prosite:PS01215|Prosite:PDOC00935	IEA		P	Mrp family signature		transcript	taxon:13686	20060427	Prosite
Prosite	SI.CL.2.cl.284.Contig1	SI.CL.2.cl.284.Contig1		GO:0005554	Prosite:PS01215|Prosite:PDOC00935	IEA		P	Mrp family signature		transcript	taxon:13686	20060427	Prosite
Prosite	SI.CL.2.cl.290.Contig1	SI.CL.2.cl.290.Contig1		GO:0004175	Prosite:PS00388|Prosite:PDOC00326	IEA		P	Proteasome A-type subunits signature		transcript	taxon:13686	20060427	Prosite
Prosite	SI.CL.2.cl.290.Contig1	SI.CL.2.cl.290.Contig1		GO:0006511	Prosite:PS00388|Prosite:PDOC00326	IEA		P	Proteasome A-type subunits signature		transcript	taxon:13686	20060427	Prosite
Prosite	SI.CL.2.cl.290.Contig1	SI.CL.2.cl.290.Contig1		GO:0005839	Prosite:PS00388|Prosite:PDOC00326	IEA		P	Proteasome A-type subunits signature		transcript	taxon:13686	20060427	Prosite
Prosite	SI.CL.3.cl.306.Contig1	SI.CL.3.cl.306.Contig1		GO:0003735	Prosite:PS00055|Prosite:PDOC00054	IEA		P	Ribosomal protein S12 signature		transcript	taxon:13686	20060427	Prosite
Prosite	SI.CL.3.cl.306.Contig1	SI.CL.3.cl.306.Contig1		GO:0006412	Prosite:PS00055|Prosite:PDOC00054	IEA		P	Ribosomal protein S12 signature		transcript	taxon:13686	20060427	Prosite
Prosite	SI.CL.3.cl.306.Contig1	SI.CL.3.cl.306.Contig1		GO:0005622	Prosite:PS00055|Prosite:PDOC00054	IEA		P	Ribosomal protein S12 signature		transcript	taxon:13686	20060427	Prosite
Prosite	SI.CL.3.cl.306.Contig1	SI.CL.3.cl.306.Contig1		GO:0005840	Prosite:PS00055|Prosite:PDOC00054	IEA		P	Ribosomal protein S12 signature		transcript	taxon:13686	20060427	Prosite
Prosite	SI.CL.3.cl.310.Contig1	SI.CL.3.cl.310.Contig1		GO:0003735	Prosite:PS00529|Prosite:PDOC00458	IEA		P	Ribosomal protein S24e signature		transcript	taxon:13686	20060427	Prosite
Prosite	SI.CL.3.cl.310.Contig1	SI.CL.3.cl.310.Contig1		GO:0006412	Prosite:PS00529|Prosite:PDOC00458	IEA		P	Ribosomal protein S24e signature		transcript	taxon:13686	20060427	Prosite
Prosite	SI.CL.3.cl.310.Contig1	SI.CL.3.cl.310.Contig1		GO:0005622	Prosite:PS00529|Prosite:PDOC00458	IEA		P	Ribosomal protein S24e signature		transcript	taxon:13686	20060427	Prosite
Prosite	SI.CL.3.cl.310.Contig1	SI.CL.3.cl.310.Contig1		GO:0005840	Prosite:PS00529|Prosite:PDOC00458	IEA		P	Ribosomal protein S24e signature		transcript	taxon:13686	20060427	Prosite
Prosite	SI.CL.3.cl.314.Contig1	SI.CL.3.cl.314.Contig1		GO:0004252	Prosite:PS00134|Prosite:PDOC00124	IEA		P	Serine proteases, trypsin family, histidine active site		transcript	taxon:13686	20060427	Prosite
Prosite	SI.CL.3.cl.314.Contig1	SI.CL.3.cl.314.Contig1		GO:0006508	Prosite:PS00134|Prosite:PDOC00124	IEA		P	Serine proteases, trypsin family, histidine active site		transcript	taxon:13686	20060427	Prosite
Prosite	SI.CL.3.cl.316.Contig1	SI.CL.3.cl.316.Contig1		GO:0005509	Prosite:PS00018|Prosite:PDOC00018	IEA		P	EF-hand calcium-binding domain		transcript	taxon:13686	20060427	Prosite
Prosite	SI.CL.3.cl.335.Contig1	SI.CL.3.cl.335.Contig1		GO:0005215	Prosite:PS00213|Prosite:PDOC00187	IEA		P	Lipocalin signature		transcript	taxon:13686	20060427	Prosite
Prosite	SI.CL.3.cl.335.Contig1	SI.CL.3.cl.335.Contig1		GO:0005488	Prosite:PS00213|Prosite:PDOC00187	IEA		P	Lipocalin signature		transcript	taxon:13686	20060427	Prosite
Prosite	SI.CL.3.cl.335.Contig1	SI.CL.3.cl.335.Contig1		GO:0006810	Prosite:PS00213|Prosite:PDOC00187	IEA		P	Lipocalin signature		transcript	taxon:13686	20060427	Prosite
Prosite	SI.CL.3.cl.342.Contig1	SI.CL.3.cl.342.Contig1		GO:0005524	Prosite:PS00113|Prosite:PDOC00104	IEA		P	Adenylate kinase signature		transcript	taxon:13686	20060427	Prosite
Prosite	SI.CL.3.cl.342.Contig1	SI.CL.3.cl.342.Contig1		GO:0019201	Prosite:PS00113|Prosite:PDOC00104	IEA		P	Adenylate kinase signature		transcript	taxon:13686	20060427	Prosite
Prosite	SI.CL.3.cl.342.Contig1	SI.CL.3.cl.342.Contig1		GO:0006139	Prosite:PS00113|Prosite:PDOC00104	IEA		P	Adenylate kinase signature		transcript	taxon:13686	20060427	Prosite
Prosite	SI.CL.3.cl.345.Contig1	SI.CL.3.cl.345.Contig1		GO:0005489	Prosite:PS00197|Prosite:PDOC00175	IEA		P	2Fe-2S ferredoxins, iron-sulfur binding region signature		transcript	taxon:13686	20060427	Prosite
Prosite	SI.CL.3.cl.345.Contig1	SI.CL.3.cl.345.Contig1		GO:0006118	Prosite:PS00197|Prosite:PDOC00175	IEA		P	2Fe-2S ferredoxins, iron-sulfur binding region signature		transcript	taxon:13686	20060427	Prosite
Prosite	SI.CL.3.cl.345.Contig1	SI.CL.3.cl.345.Contig1		GO:0005489	Prosite:PS00198|Prosite:PDOC00176	IEA		P	4Fe-4S ferredoxins, iron-sulfur binding region signature		transcript	taxon:13686	20060427	Prosite
Prosite	SI.CL.3.cl.345.Contig1	SI.CL.3.cl.345.Contig1		GO:0005506	Prosite:PS00198|Prosite:PDOC00176	IEA		P	4Fe-4S ferredoxins, iron-sulfur binding region signature		transcript	taxon:13686	20060427	Prosite
Prosite	SI.CL.3.cl.345.Contig1	SI.CL.3.cl.345.Contig1		GO:0006118	Prosite:PS00198|Prosite:PDOC00176	IEA		P	4Fe-4S ferredoxins, iron-sulfur binding region signature		transcript	taxon:13686	20060427	Prosite
Prosite	SI.CL.3.cl.360.Contig1	SI.CL.3.cl.360.Contig1		GO:0003824	Prosite:PS00166|Prosite:PDOC00150	IEA		P	Enoyl-CoA hydratase/isomerase signature		transcript	taxon:13686	20060427	Prosite
Prosite	SI.CL.3.cl.360.Contig1	SI.CL.3.cl.360.Contig1		GO:0008152	Prosite:PS00166|Prosite:PDOC00150	IEA		P	Enoyl-CoA hydratase/isomerase signature		transcript	taxon:13686	20060427	Prosite
Prosite	SI.CL.3.cl.373.Contig1	SI.CL.3.cl.373.Contig1		GO:0004634	Prosite:PS00164|Prosite:PDOC00148	IEA		P	Enolase signature		transcript	taxon:13686	20060427	Prosite
Prosite	SI.CL.3.cl.373.Contig1	SI.CL.3.cl.373.Contig1		GO:0006096	Prosite:PS00164|Prosite:PDOC00148	IEA		P	Enolase signature		transcript	taxon:13686	20060427	Prosite
Prosite	SI.CL.3.cl.373.Contig1	SI.CL.3.cl.373.Contig1		GO:0000015	Prosite:PS00164|Prosite:PDOC00148	IEA		P	Enolase signature		transcript	taxon:13686	20060427	Prosite
Prosite	SI.CL.3.cl.379.Contig1	SI.CL.3.cl.379.Contig1		GO:0004785	Prosite:PS00087|Prosite:PDOC00082	IEA		P	Copper/Zinc superoxide dismutase signature 1		transcript	taxon:13686	20060427	Prosite
Prosite	SI.CL.3.cl.379.Contig1	SI.CL.3.cl.379.Contig1		GO:0046872	Prosite:PS00087|Prosite:PDOC00082	IEA		P	Copper/Zinc superoxide dismutase signature 1		transcript	taxon:13686	20060427	Prosite
Prosite	SI.CL.3.cl.379.Contig1	SI.CL.3.cl.379.Contig1		GO:0006801	Prosite:PS00087|Prosite:PDOC00082	IEA		P	Copper/Zinc superoxide dismutase signature 1		transcript	taxon:13686	20060427	Prosite
Prosite	SI.CL.3.cl.379.Contig1	SI.CL.3.cl.379.Contig1		GO:0004785	Prosite:PS00332|Prosite:PDOC00082	IEA		P	Copper/Zinc superoxide dismutase signature 2		transcript	taxon:13686	20060427	Prosite
Prosite	SI.CL.3.cl.379.Contig1	SI.CL.3.cl.379.Contig1		GO:0046872	Prosite:PS00332|Prosite:PDOC00082	IEA		P	Copper/Zinc superoxide dismutase signature 2		transcript	taxon:13686	20060427	Prosite
Prosite	SI.CL.3.cl.379.Contig1	SI.CL.3.cl.379.Contig1		GO:0006801	Prosite:PS00332|Prosite:PDOC00082	IEA		P	Copper/Zinc superoxide dismutase signature 2		transcript	taxon:13686	20060427	Prosite
Prosite	SI.CL.3.cl.398.Contig1	SI.CL.3.cl.398.Contig1		GO:0003735	Prosite:PS00358|Prosite:PDOC00309	IEA		P	Ribosomal protein L5 signature		transcript	taxon:13686	20060427	Prosite
Prosite	SI.CL.3.cl.398.Contig1	SI.CL.3.cl.398.Contig1		GO:0006412	Prosite:PS00358|Prosite:PDOC00309	IEA		P	Ribosomal protein L5 signature		transcript	taxon:13686	20060427	Prosite
Prosite	SI.CL.3.cl.398.Contig1	SI.CL.3.cl.398.Contig1		GO:0005622	Prosite:PS00358|Prosite:PDOC00309	IEA		P	Ribosomal protein L5 signature		transcript	taxon:13686	20060427	Prosite
Prosite	SI.CL.3.cl.398.Contig1	SI.CL.3.cl.398.Contig1		GO:0005840	Prosite:PS00358|Prosite:PDOC00309	IEA		P	Ribosomal protein L5 signature		transcript	taxon:13686	20060427	Prosite
Prosite	SI.CL.4.cl.406.Contig1	SI.CL.4.cl.406.Contig1		GO:0004252	Prosite:PS00134|Prosite:PDOC00124	IEA		P	Serine proteases, trypsin family, histidine active site		transcript	taxon:13686	20060427	Prosite
Prosite	SI.CL.4.cl.406.Contig1	SI.CL.4.cl.406.Contig1		GO:0006508	Prosite:PS00134|Prosite:PDOC00124	IEA		P	Serine proteases, trypsin family, histidine active site		transcript	taxon:13686	20060427	Prosite
Prosite	SI.CL.4.cl.406.Contig1	SI.CL.4.cl.406.Contig1		GO:0004252	Prosite:PS00135|Prosite:PDOC00124	IEA		P	Serine proteases, trypsin family, serine active site		transcript	taxon:13686	20060427	Prosite
Prosite	SI.CL.4.cl.406.Contig1	SI.CL.4.cl.406.Contig1		GO:0006508	Prosite:PS00135|Prosite:PDOC00124	IEA		P	Serine proteases, trypsin family, serine active site		transcript	taxon:13686	20060427	Prosite
Prosite	SI.CL.4.cl.406.Contig2	SI.CL.4.cl.406.Contig2		GO:0004252	Prosite:PS00134|Prosite:PDOC00124	IEA		P	Serine proteases, trypsin family, histidine active site		transcript	taxon:13686	20060427	Prosite
Prosite	SI.CL.4.cl.406.Contig2	SI.CL.4.cl.406.Contig2		GO:0006508	Prosite:PS00134|Prosite:PDOC00124	IEA		P	Serine proteases, trypsin family, histidine active site		transcript	taxon:13686	20060427	Prosite
Prosite	SI.CL.4.cl.406.Contig2	SI.CL.4.cl.406.Contig2		GO:0004252	Prosite:PS00135|Prosite:PDOC00124	IEA		P	Serine proteases, trypsin family, serine active site		transcript	taxon:13686	20060427	Prosite
Prosite	SI.CL.4.cl.406.Contig2	SI.CL.4.cl.406.Contig2		GO:0006508	Prosite:PS00135|Prosite:PDOC00124	IEA		P	Serine proteases, trypsin family, serine active site		transcript	taxon:13686	20060427	Prosite
Prosite	SI.CL.4.cl.412.Contig1	SI.CL.4.cl.412.Contig1		GO:0004867	Prosite:PS00280|Prosite:PDOC00252	IEA		P	Pancreatic trypsin inhibitor (Kunitz) family signature		transcript	taxon:13686	20060427	Prosite
Prosite	SI.CL.4.cl.442.Contig1	SI.CL.4.cl.442.Contig1		GO:0003743	Prosite:PS01262|Prosite:PDOC00970	IEA		P	Eukaryotic initiation factor 1A signature		transcript	taxon:13686	20060427	Prosite
Prosite	SI.CL.4.cl.442.Contig1	SI.CL.4.cl.442.Contig1		GO:0006413	Prosite:PS01262|Prosite:PDOC00970	IEA		P	Eukaryotic initiation factor 1A signature		transcript	taxon:13686	20060427	Prosite
Prosite	SI.CL.4.cl.454.Contig1	SI.CL.4.cl.454.Contig1		GO:0005529	Prosite:PS00615|Prosite:PDOC00537	IEA		P	C-type lectin domain signature		transcript	taxon:13686	20060427	Prosite
Prosite	SI.CL.4.cl.467.Contig1	SI.CL.4.cl.467.Contig1		GO:0004175	Prosite:PS00854|Prosite:PDOC00668	IEA		P	Proteasome B-type subunits signature		transcript	taxon:13686	20060427	Prosite
Prosite	SI.CL.4.cl.467.Contig1	SI.CL.4.cl.467.Contig1		GO:0006511	Prosite:PS00854|Prosite:PDOC00668	IEA		P	Proteasome B-type subunits signature		transcript	taxon:13686	20060427	Prosite
Prosite	SI.CL.4.cl.467.Contig1	SI.CL.4.cl.467.Contig1		GO:0005839	Prosite:PS00854|Prosite:PDOC00668	IEA		P	Proteasome B-type subunits signature		transcript	taxon:13686	20060427	Prosite
Prosite	SI.CL.4.cl.468.Contig1	SI.CL.4.cl.468.Contig1		GO:0003735	Prosite:PS00527|Prosite:PDOC00456	IEA		P	Ribosomal protein S14 signature		transcript	taxon:13686	20060427	Prosite
Prosite	SI.CL.4.cl.468.Contig1	SI.CL.4.cl.468.Contig1		GO:0006412	Prosite:PS00527|Prosite:PDOC00456	IEA		P	Ribosomal protein S14 signature		transcript	taxon:13686	20060427	Prosite
Prosite	SI.CL.4.cl.468.Contig1	SI.CL.4.cl.468.Contig1		GO:0005622	Prosite:PS00527|Prosite:PDOC00456	IEA		P	Ribosomal protein S14 signature		transcript	taxon:13686	20060427	Prosite
Prosite	SI.CL.4.cl.468.Contig1	SI.CL.4.cl.468.Contig1		GO:0005840	Prosite:PS00527|Prosite:PDOC00456	IEA		P	Ribosomal protein S14 signature		transcript	taxon:13686	20060427	Prosite
Prosite	SI.CL.4.cl.473.Contig1	SI.CL.4.cl.473.Contig1		GO:0004842	Prosite:PS00183|Prosite:PDOC00163	IEA		P	Ubiquitin-conjugating enzymes active site		transcript	taxon:13686	20060427	Prosite
Prosite	SI.CL.4.cl.473.Contig1	SI.CL.4.cl.473.Contig1		GO:0006464	Prosite:PS00183|Prosite:PDOC00163	IEA		P	Ubiquitin-conjugating enzymes active site		transcript	taxon:13686	20060427	Prosite
Prosite	SI.CL.4.cl.473.Contig1	SI.CL.4.cl.473.Contig1		GO:0006512	Prosite:PS00183|Prosite:PDOC00163	IEA		P	Ubiquitin-conjugating enzymes active site		transcript	taxon:13686	20060427	Prosite
Prosite	SI.CL.4.cl.492.Contig1	SI.CL.4.cl.492.Contig1		GO:0004550	Prosite:PS00469|Prosite:PDOC00409	IEA		P	Nucleoside diphosphate kinases active site		transcript	taxon:13686	20060427	Prosite
Prosite	SI.CL.4.cl.492.Contig1	SI.CL.4.cl.492.Contig1		GO:0005524	Prosite:PS00469|Prosite:PDOC00409	IEA		P	Nucleoside diphosphate kinases active site		transcript	taxon:13686	20060427	Prosite
Prosite	SI.CL.4.cl.492.Contig1	SI.CL.4.cl.492.Contig1		GO:0006183	Prosite:PS00469|Prosite:PDOC00409	IEA		P	Nucleoside diphosphate kinases active site		transcript	taxon:13686	20060427	Prosite
Prosite	SI.CL.4.cl.492.Contig1	SI.CL.4.cl.492.Contig1		GO:0006228	Prosite:PS00469|Prosite:PDOC00409	IEA		P	Nucleoside diphosphate kinases active site		transcript	taxon:13686	20060427	Prosite
Prosite	SI.CL.4.cl.492.Contig1	SI.CL.4.cl.492.Contig1		GO:0006241	Prosite:PS00469|Prosite:PDOC00409	IEA		P	Nucleoside diphosphate kinases active site		transcript	taxon:13686	20060427	Prosite
Prosite	SI.CL.4.cl.492.Contig2	SI.CL.4.cl.492.Contig2		GO:0004550	Prosite:PS00469|Prosite:PDOC00409	IEA		P	Nucleoside diphosphate kinases active site		transcript	taxon:13686	20060427	Prosite
Prosite	SI.CL.4.cl.492.Contig2	SI.CL.4.cl.492.Contig2		GO:0005524	Prosite:PS00469|Prosite:PDOC00409	IEA		P	Nucleoside diphosphate kinases active site		transcript	taxon:13686	20060427	Prosite
Prosite	SI.CL.4.cl.492.Contig2	SI.CL.4.cl.492.Contig2		GO:0006183	Prosite:PS00469|Prosite:PDOC00409	IEA		P	Nucleoside diphosphate kinases active site		transcript	taxon:13686	20060427	Prosite
Prosite	SI.CL.4.cl.492.Contig2	SI.CL.4.cl.492.Contig2		GO:0006228	Prosite:PS00469|Prosite:PDOC00409	IEA		P	Nucleoside diphosphate kinases active site		transcript	taxon:13686	20060427	Prosite
Prosite	SI.CL.4.cl.492.Contig2	SI.CL.4.cl.492.Contig2		GO:0006241	Prosite:PS00469|Prosite:PDOC00409	IEA		P	Nucleoside diphosphate kinases active site		transcript	taxon:13686	20060427	Prosite
Prosite	SI.CL.4.cl.493.Contig1	SI.CL.4.cl.493.Contig1		GO:0016491	Prosite:PS00061|Prosite:PDOC00060	IEA		P	Short-chain dehydrogenases/reductases family signature		transcript	taxon:13686	20060427	Prosite
Prosite	SI.CL.4.cl.493.Contig1	SI.CL.4.cl.493.Contig1		GO:0008152	Prosite:PS00061|Prosite:PDOC00060	IEA		P	Short-chain dehydrogenases/reductases family signature		transcript	taxon:13686	20060427	Prosite
Prosite	SI.CL.5.cl.506.Contig1	SI.CL.5.cl.506.Contig1		GO:0003735	Prosite:PS01145|Prosite:PDOC00882	IEA		P	Ribosomal protein L34e signature		transcript	taxon:13686	20060427	Prosite
Prosite	SI.CL.5.cl.506.Contig1	SI.CL.5.cl.506.Contig1		GO:0006412	Prosite:PS01145|Prosite:PDOC00882	IEA		P	Ribosomal protein L34e signature		transcript	taxon:13686	20060427	Prosite
Prosite	SI.CL.5.cl.506.Contig1	SI.CL.5.cl.506.Contig1		GO:0005622	Prosite:PS01145|Prosite:PDOC00882	IEA		P	Ribosomal protein L34e signature		transcript	taxon:13686	20060427	Prosite
Prosite	SI.CL.5.cl.506.Contig1	SI.CL.5.cl.506.Contig1		GO:0005840	Prosite:PS01145|Prosite:PDOC00882	IEA		P	Ribosomal protein L34e signature		transcript	taxon:13686	20060427	Prosite
Prosite	SI.CL.5.cl.508.Contig1	SI.CL.5.cl.508.Contig1		GO:0004252	Prosite:PS00134|Prosite:PDOC00124	IEA		P	Serine proteases, trypsin family, histidine active site		transcript	taxon:13686	20060427	Prosite
Prosite	SI.CL.5.cl.508.Contig1	SI.CL.5.cl.508.Contig1		GO:0006508	Prosite:PS00134|Prosite:PDOC00124	IEA		P	Serine proteases, trypsin family, histidine active site		transcript	taxon:13686	20060427	Prosite
Prosite	SI.CL.5.cl.519.Contig1	SI.CL.5.cl.519.Contig1		GO:0000179	Prosite:PS01131|Prosite:PDOC00871	IEA		P	Ribosomal RNA adenine dimethylases signature		transcript	taxon:13686	20060427	Prosite
Prosite	SI.CL.5.cl.519.Contig1	SI.CL.5.cl.519.Contig1		GO:0008649	Prosite:PS01131|Prosite:PDOC00871	IEA		P	Ribosomal RNA adenine dimethylases signature		transcript	taxon:13686	20060427	Prosite
Prosite	SI.CL.5.cl.519.Contig1	SI.CL.5.cl.519.Contig1		GO:0000154	Prosite:PS01131|Prosite:PDOC00871	IEA		P	Ribosomal RNA adenine dimethylases signature		transcript	taxon:13686	20060427	Prosite
Prosite	SI.CL.5.cl.528.Contig1	SI.CL.5.cl.528.Contig1		GO:0003735	Prosite:PS01199|Prosite:PDOC00922	IEA		P	Ribosomal protein L1 signature		transcript	taxon:13686	20060427	Prosite
Prosite	SI.CL.5.cl.528.Contig1	SI.CL.5.cl.528.Contig1		GO:0006412	Prosite:PS01199|Prosite:PDOC00922	IEA		P	Ribosomal protein L1 signature		transcript	taxon:13686	20060427	Prosite
Prosite	SI.CL.5.cl.528.Contig1	SI.CL.5.cl.528.Contig1		GO:0005622	Prosite:PS01199|Prosite:PDOC00922	IEA		P	Ribosomal protein L1 signature		transcript	taxon:13686	20060427	Prosite
Prosite	SI.CL.5.cl.528.Contig1	SI.CL.5.cl.528.Contig1		GO:0005840	Prosite:PS01199|Prosite:PDOC00922	IEA		P	Ribosomal protein L1 signature		transcript	taxon:13686	20060427	Prosite
Prosite	SI.CL.5.cl.535.Contig1	SI.CL.5.cl.535.Contig1		GO:0005489	Prosite:PS00198|Prosite:PDOC00176	IEA		P	4Fe-4S ferredoxins, iron-sulfur binding region signature		transcript	taxon:13686	20060427	Prosite
Prosite	SI.CL.5.cl.535.Contig1	SI.CL.5.cl.535.Contig1		GO:0005506	Prosite:PS00198|Prosite:PDOC00176	IEA		P	4Fe-4S ferredoxins, iron-sulfur binding region signature		transcript	taxon:13686	20060427	Prosite
Prosite	SI.CL.5.cl.535.Contig1	SI.CL.5.cl.535.Contig1		GO:0006118	Prosite:PS00198|Prosite:PDOC00176	IEA		P	4Fe-4S ferredoxins, iron-sulfur binding region signature		transcript	taxon:13686	20060427	Prosite
Prosite	SI.CL.5.cl.545.Contig3	SI.CL.5.cl.545.Contig3		GO:0004497	Prosite:PS00086|Prosite:PDOC00081	IEA		P	Cytochrome P450 cysteine heme-iron ligand signature		transcript	taxon:13686	20060427	Prosite
Prosite	SI.CL.5.cl.545.Contig3	SI.CL.5.cl.545.Contig3		GO:0005506	Prosite:PS00086|Prosite:PDOC00081	IEA		P	Cytochrome P450 cysteine heme-iron ligand signature		transcript	taxon:13686	20060427	Prosite
Prosite	SI.CL.5.cl.545.Contig3	SI.CL.5.cl.545.Contig3		GO:0020037	Prosite:PS00086|Prosite:PDOC00081	IEA		P	Cytochrome P450 cysteine heme-iron ligand signature		transcript	taxon:13686	20060427	Prosite
Prosite	SI.CL.5.cl.545.Contig3	SI.CL.5.cl.545.Contig3		GO:0006118	Prosite:PS00086|Prosite:PDOC00081	IEA		P	Cytochrome P450 cysteine heme-iron ligand signature		transcript	taxon:13686	20060427	Prosite
Prosite	SI.CL.5.cl.557.Contig1	SI.CL.5.cl.557.Contig1		GO:0003677	Prosite:PS01154|Prosite:PDOC00889	IEA		P	RNA polymerases L / 13 to 16 Kd subunits signature		transcript	taxon:13686	20060427	Prosite
Prosite	SI.CL.5.cl.557.Contig1	SI.CL.5.cl.557.Contig1		GO:0003899	Prosite:PS01154|Prosite:PDOC00889	IEA		P	RNA polymerases L / 13 to 16 Kd subunits signature		transcript	taxon:13686	20060427	Prosite
Prosite	SI.CL.5.cl.557.Contig1	SI.CL.5.cl.557.Contig1		GO:0006350	Prosite:PS01154|Prosite:PDOC00889	IEA		P	RNA polymerases L / 13 to 16 Kd subunits signature		transcript	taxon:13686	20060427	Prosite
Prosite	SI.CL.5.cl.571.Contig1	SI.CL.5.cl.571.Contig1		GO:0003735	Prosite:PS00474|Prosite:PDOC00385	IEA		P	Ribosomal protein L3 signature		transcript	taxon:13686	20060427	Prosite
Prosite	SI.CL.5.cl.571.Contig1	SI.CL.5.cl.571.Contig1		GO:0006412	Prosite:PS00474|Prosite:PDOC00385	IEA		P	Ribosomal protein L3 signature		transcript	taxon:13686	20060427	Prosite
Prosite	SI.CL.5.cl.571.Contig1	SI.CL.5.cl.571.Contig1		GO:0005622	Prosite:PS00474|Prosite:PDOC00385	IEA		P	Ribosomal protein L3 signature		transcript	taxon:13686	20060427	Prosite
Prosite	SI.CL.5.cl.571.Contig1	SI.CL.5.cl.571.Contig1		GO:0005840	Prosite:PS00474|Prosite:PDOC00385	IEA		P	Ribosomal protein L3 signature		transcript	taxon:13686	20060427	Prosite
Prosite	SI.CL.5.cl.585.Contig1	SI.CL.5.cl.585.Contig1		GO:0003735	Prosite:PS00052|Prosite:PDOC00051	IEA		P	Ribosomal protein S7 signature		transcript	taxon:13686	20060427	Prosite
Prosite	SI.CL.5.cl.585.Contig1	SI.CL.5.cl.585.Contig1		GO:0006412	Prosite:PS00052|Prosite:PDOC00051	IEA		P	Ribosomal protein S7 signature		transcript	taxon:13686	20060427	Prosite
Prosite	SI.CL.5.cl.585.Contig1	SI.CL.5.cl.585.Contig1		GO:0005622	Prosite:PS00052|Prosite:PDOC00051	IEA		P	Ribosomal protein S7 signature		transcript	taxon:13686	20060427	Prosite
Prosite	SI.CL.5.cl.585.Contig1	SI.CL.5.cl.585.Contig1		GO:0005840	Prosite:PS00052|Prosite:PDOC00051	IEA		P	Ribosomal protein S7 signature		transcript	taxon:13686	20060427	Prosite
Prosite	SI.CL.5.cl.591.Contig1	SI.CL.5.cl.591.Contig1		GO:0003735	Prosite:PS00475|Prosite:PDOC00386	IEA		P	Ribosomal protein L15 signature		transcript	taxon:13686	20060427	Prosite
Prosite	SI.CL.5.cl.591.Contig1	SI.CL.5.cl.591.Contig1		GO:0006412	Prosite:PS00475|Prosite:PDOC00386	IEA		P	Ribosomal protein L15 signature		transcript	taxon:13686	20060427	Prosite
Prosite	SI.CL.5.cl.591.Contig1	SI.CL.5.cl.591.Contig1		GO:0005622	Prosite:PS00475|Prosite:PDOC00386	IEA		P	Ribosomal protein L15 signature		transcript	taxon:13686	20060427	Prosite
Prosite	SI.CL.5.cl.591.Contig1	SI.CL.5.cl.591.Contig1		GO:0005840	Prosite:PS00475|Prosite:PDOC00386	IEA		P	Ribosomal protein L15 signature		transcript	taxon:13686	20060427	Prosite
Prosite	SI.CL.6.cl.609.Contig1	SI.CL.6.cl.609.Contig1		GO:0004197	Prosite:PS00139|Prosite:PDOC00126	IEA		P	Eukaryotic thiol (cysteine) proteases cysteine active site		transcript	taxon:13686	20060427	Prosite
Prosite	SI.CL.6.cl.609.Contig1	SI.CL.6.cl.609.Contig1		GO:0006508	Prosite:PS00139|Prosite:PDOC00126	IEA		P	Eukaryotic thiol (cysteine) proteases cysteine active site		transcript	taxon:13686	20060427	Prosite
Prosite	SI.CL.6.cl.609.Contig1	SI.CL.6.cl.609.Contig1		GO:0004197	Prosite:PS00639|Prosite:PDOC00126	IEA		P	Eukaryotic thiol (cysteine) proteases histidine active site		transcript	taxon:13686	20060427	Prosite
Prosite	SI.CL.6.cl.609.Contig1	SI.CL.6.cl.609.Contig1		GO:0006508	Prosite:PS00639|Prosite:PDOC00126	IEA		P	Eukaryotic thiol (cysteine) proteases histidine active site		transcript	taxon:13686	20060427	Prosite
Prosite	SI.CL.6.cl.609.Contig1	SI.CL.6.cl.609.Contig1		GO:0004197	Prosite:PS00640|Prosite:PDOC00126	IEA		P	Eukaryotic thiol (cysteine) proteases asparagine active site		transcript	taxon:13686	20060427	Prosite
Prosite	SI.CL.6.cl.609.Contig1	SI.CL.6.cl.609.Contig1		GO:0006508	Prosite:PS00640|Prosite:PDOC00126	IEA		P	Eukaryotic thiol (cysteine) proteases asparagine active site		transcript	taxon:13686	20060427	Prosite
Prosite	SI.CL.6.cl.616.Contig1	SI.CL.6.cl.616.Contig1		GO:0008137	Prosite:PS00542|Prosite:PDOC00468	IEA		P	Respiratory chain NADH dehydrogenase 30 Kd subunit signature		transcript	taxon:13686	20060427	Prosite
Prosite	SI.CL.6.cl.616.Contig1	SI.CL.6.cl.616.Contig1		GO:0006120	Prosite:PS00542|Prosite:PDOC00468	IEA		P	Respiratory chain NADH dehydrogenase 30 Kd subunit signature		transcript	taxon:13686	20060427	Prosite
Prosite	SI.CL.6.cl.619.Contig1	SI.CL.6.cl.619.Contig1		GO:0005509	Prosite:PS00018|Prosite:PDOC00018	IEA		P	EF-hand calcium-binding domain		transcript	taxon:13686	20060427	Prosite
Prosite	SI.CL.6.cl.643.Contig1	SI.CL.6.cl.643.Contig1		GO:0004420	Prosite:PS00318|Prosite:PDOC00064	IEA		P	Hydroxymethylglutaryl-coenzyme A reductases signature 2		transcript	taxon:13686	20060427	Prosite
Prosite	SI.CL.6.cl.643.Contig1	SI.CL.6.cl.643.Contig1		GO:0009058	Prosite:PS00318|Prosite:PDOC00064	IEA		P	Hydroxymethylglutaryl-coenzyme A reductases signature 2		transcript	taxon:13686	20060427	Prosite
Prosite	SI.CL.6.cl.644.Contig1	SI.CL.6.cl.644.Contig1		GO:0008237	Prosite:PS00142|Prosite:PDOC00129	IEA		P	Neutral zinc metallopeptidases, zinc-binding region signature		transcript	taxon:13686	20060427	Prosite
Prosite	SI.CL.6.cl.644.Contig1	SI.CL.6.cl.644.Contig1		GO:0008270	Prosite:PS00142|Prosite:PDOC00129	IEA		P	Neutral zinc metallopeptidases, zinc-binding region signature		transcript	taxon:13686	20060427	Prosite
Prosite	SI.CL.6.cl.644.Contig1	SI.CL.6.cl.644.Contig1		GO:0006508	Prosite:PS00142|Prosite:PDOC00129	IEA		P	Neutral zinc metallopeptidases, zinc-binding region signature		transcript	taxon:13686	20060427	Prosite
Prosite	SI.CL.6.cl.646.Contig1	SI.CL.6.cl.646.Contig1		GO:0005215	Prosite:PS00221|Prosite:PDOC00193	IEA		P	MIP family signature		transcript	taxon:13686	20060427	Prosite
Prosite	SI.CL.6.cl.646.Contig1	SI.CL.6.cl.646.Contig1		GO:0006810	Prosite:PS00221|Prosite:PDOC00193	IEA		P	MIP family signature		transcript	taxon:13686	20060427	Prosite
Prosite	SI.CL.6.cl.646.Contig1	SI.CL.6.cl.646.Contig1		GO:0016020	Prosite:PS00221|Prosite:PDOC00193	IEA		P	MIP family signature		transcript	taxon:13686	20060427	Prosite
Prosite	SI.CL.6.cl.668.Contig1	SI.CL.6.cl.668.Contig1		GO:0003884	Prosite:PS00677|Prosite:PDOC00573	IEA		P	D-amino acid oxidases signature		transcript	taxon:13686	20060427	Prosite
Prosite	SI.CL.6.cl.668.Contig1	SI.CL.6.cl.668.Contig1		GO:0006118	Prosite:PS00677|Prosite:PDOC00573	IEA		P	D-amino acid oxidases signature		transcript	taxon:13686	20060427	Prosite
Prosite	SI.CL.6.cl.673.Contig1	SI.CL.6.cl.673.Contig1		GO:0005524	Prosite:PS00211|Prosite:PDOC00185	IEA		P	ABC transporters family signature		transcript	taxon:13686	20060427	Prosite
Prosite	SI.CL.6.cl.673.Contig1	SI.CL.6.cl.673.Contig1		GO:0016887	Prosite:PS00211|Prosite:PDOC00185	IEA		P	ABC transporters family signature		transcript	taxon:13686	20060427	Prosite
Prosite	SI.CL.6.cl.687.Contig1	SI.CL.6.cl.687.Contig1		GO:0003735	Prosite:PS01104|Prosite:PDOC00848	IEA		P	Ribosomal protein L13e signature		transcript	taxon:13686	20060427	Prosite
Prosite	SI.CL.6.cl.687.Contig1	SI.CL.6.cl.687.Contig1		GO:0006412	Prosite:PS01104|Prosite:PDOC00848	IEA		P	Ribosomal protein L13e signature		transcript	taxon:13686	20060427	Prosite
Prosite	SI.CL.6.cl.687.Contig1	SI.CL.6.cl.687.Contig1		GO:0005622	Prosite:PS01104|Prosite:PDOC00848	IEA		P	Ribosomal protein L13e signature		transcript	taxon:13686	20060427	Prosite
Prosite	SI.CL.6.cl.687.Contig1	SI.CL.6.cl.687.Contig1		GO:0005840	Prosite:PS01104|Prosite:PDOC00848	IEA		P	Ribosomal protein L13e signature		transcript	taxon:13686	20060427	Prosite
Prosite	SI.CL.6.cl.691.Contig1	SI.CL.6.cl.691.Contig1		GO:0005524	Prosite:PS00675|Prosite:PDOC00579	IEA		P	Sigma-54 interaction domain ATP-binding region A signature		transcript	taxon:13686	20060427	Prosite
Prosite	SI.CL.6.cl.691.Contig1	SI.CL.6.cl.691.Contig1		GO:0008134	Prosite:PS00675|Prosite:PDOC00579	IEA		P	Sigma-54 interaction domain ATP-binding region A signature		transcript	taxon:13686	20060427	Prosite
Prosite	SI.CL.6.cl.691.Contig1	SI.CL.6.cl.691.Contig1		GO:0006355	Prosite:PS00675|Prosite:PDOC00579	IEA		P	Sigma-54 interaction domain ATP-binding region A signature		transcript	taxon:13686	20060427	Prosite
Prosite	SI.CL.6.cl.691.Contig1	SI.CL.6.cl.691.Contig1		GO:0005622	Prosite:PS00675|Prosite:PDOC00579	IEA		P	Sigma-54 interaction domain ATP-binding region A signature		transcript	taxon:13686	20060427	Prosite
Prosite	SI.CL.6.cl.693.Contig1	SI.CL.6.cl.693.Contig1		GO:0005509	Prosite:PS00018|Prosite:PDOC00018	IEA		P	EF-hand calcium-binding domain		transcript	taxon:13686	20060427	Prosite
Prosite	SI.CL.7.cl.702.Contig1	SI.CL.7.cl.702.Contig1		GO:0003677	Prosite:PS01111|Prosite:PDOC00855	IEA		P	RNA polymerases K / 14 to 18 Kd subunits signature		transcript	taxon:13686	20060427	Prosite
Prosite	SI.CL.7.cl.702.Contig1	SI.CL.7.cl.702.Contig1		GO:0003899	Prosite:PS01111|Prosite:PDOC00855	IEA		P	RNA polymerases K / 14 to 18 Kd subunits signature		transcript	taxon:13686	20060427	Prosite
Prosite	SI.CL.7.cl.702.Contig1	SI.CL.7.cl.702.Contig1		GO:0006351	Prosite:PS01111|Prosite:PDOC00855	IEA		P	RNA polymerases K / 14 to 18 Kd subunits signature		transcript	taxon:13686	20060427	Prosite
Prosite	SI.CL.7.cl.741.Contig1	SI.CL.7.cl.741.Contig1		GO:0042302	Prosite:PS00233|Prosite:PDOC00206	IEA		P	Chitin-binding type R&R domain signature		transcript	taxon:13686	20060427	Prosite
Prosite	SI.CL.7.cl.745.Contig1	SI.CL.7.cl.745.Contig1		GO:0016491	Prosite:PS00061|Prosite:PDOC00060	IEA		P	Short-chain dehydrogenases/reductases family signature		transcript	taxon:13686	20060427	Prosite
Prosite	SI.CL.7.cl.745.Contig1	SI.CL.7.cl.745.Contig1		GO:0008152	Prosite:PS00061|Prosite:PDOC00060	IEA		P	Short-chain dehydrogenases/reductases family signature		transcript	taxon:13686	20060427	Prosite
Prosite	SI.CL.7.cl.770.Contig1	SI.CL.7.cl.770.Contig1		GO:0016491	Prosite:PS01136|Prosite:PDOC00874	IEA		P	Uncharacterized protein family UPF0034 signature		transcript	taxon:13686	20060427	Prosite
Prosite	SI.CL.7.cl.770.Contig1	SI.CL.7.cl.770.Contig1		GO:0050660	Prosite:PS01136|Prosite:PDOC00874	IEA		P	Uncharacterized protein family UPF0034 signature		transcript	taxon:13686	20060427	Prosite
Prosite	SI.CL.7.cl.770.Contig1	SI.CL.7.cl.770.Contig1		GO:0008033	Prosite:PS01136|Prosite:PDOC00874	IEA		P	Uncharacterized protein family UPF0034 signature		transcript	taxon:13686	20060427	Prosite
Prosite	SI.CL.7.cl.784.Contig1	SI.CL.7.cl.784.Contig1		GO:0004252	Prosite:PS00134|Prosite:PDOC00124	IEA		P	Serine proteases, trypsin family, histidine active site		transcript	taxon:13686	20060427	Prosite
Prosite	SI.CL.7.cl.784.Contig1	SI.CL.7.cl.784.Contig1		GO:0006508	Prosite:PS00134|Prosite:PDOC00124	IEA		P	Serine proteases, trypsin family, histidine active site		transcript	taxon:13686	20060427	Prosite
Prosite	SI.CL.7.cl.784.Contig2	SI.CL.7.cl.784.Contig2		GO:0004252	Prosite:PS00134|Prosite:PDOC00124	IEA		P	Serine proteases, trypsin family, histidine active site		transcript	taxon:13686	20060427	Prosite
Prosite	SI.CL.7.cl.784.Contig2	SI.CL.7.cl.784.Contig2		GO:0006508	Prosite:PS00134|Prosite:PDOC00124	IEA		P	Serine proteases, trypsin family, histidine active site		transcript	taxon:13686	20060427	Prosite
Prosite	SI.CL.7.cl.796.Contig1	SI.CL.7.cl.796.Contig1		GO:0003735	Prosite:PS01190|Prosite:PDOC00916	IEA		P	Ribosomal protein L36e signature		transcript	taxon:13686	20060427	Prosite
Prosite	SI.CL.7.cl.796.Contig1	SI.CL.7.cl.796.Contig1		GO:0006412	Prosite:PS01190|Prosite:PDOC00916	IEA		P	Ribosomal protein L36e signature		transcript	taxon:13686	20060427	Prosite
Prosite	SI.CL.7.cl.796.Contig1	SI.CL.7.cl.796.Contig1		GO:0005622	Prosite:PS01190|Prosite:PDOC00916	IEA		P	Ribosomal protein L36e signature		transcript	taxon:13686	20060427	Prosite
Prosite	SI.CL.7.cl.796.Contig1	SI.CL.7.cl.796.Contig1		GO:0005840	Prosite:PS01190|Prosite:PDOC00916	IEA		P	Ribosomal protein L36e signature		transcript	taxon:13686	20060427	Prosite
Prosite	SI.CL.8.cl.804.Contig1	SI.CL.8.cl.804.Contig1		GO:0042302	Prosite:PS00233|Prosite:PDOC00206	IEA		P	Chitin-binding type R&R domain signature		transcript	taxon:13686	20060427	Prosite
Prosite	SI.CL.8.cl.820.Contig1	SI.CL.8.cl.820.Contig1		GO:0004252	Prosite:PS00134|Prosite:PDOC00124	IEA		P	Serine proteases, trypsin family, histidine active site		transcript	taxon:13686	20060427	Prosite
Prosite	SI.CL.8.cl.820.Contig1	SI.CL.8.cl.820.Contig1		GO:0006508	Prosite:PS00134|Prosite:PDOC00124	IEA		P	Serine proteases, trypsin family, histidine active site		transcript	taxon:13686	20060427	Prosite
Prosite	SI.CL.8.cl.820.Contig1	SI.CL.8.cl.820.Contig1		GO:0004252	Prosite:PS00135|Prosite:PDOC00124	IEA		P	Serine proteases, trypsin family, serine active site		transcript	taxon:13686	20060427	Prosite
Prosite	SI.CL.8.cl.820.Contig1	SI.CL.8.cl.820.Contig1		GO:0006508	Prosite:PS00135|Prosite:PDOC00124	IEA		P	Serine proteases, trypsin family, serine active site		transcript	taxon:13686	20060427	Prosite
Prosite	SI.CL.8.cl.820.Contig2	SI.CL.8.cl.820.Contig2		GO:0004252	Prosite:PS00134|Prosite:PDOC00124	IEA		P	Serine proteases, trypsin family, histidine active site		transcript	taxon:13686	20060427	Prosite
Prosite	SI.CL.8.cl.820.Contig2	SI.CL.8.cl.820.Contig2		GO:0006508	Prosite:PS00134|Prosite:PDOC00124	IEA		P	Serine proteases, trypsin family, histidine active site		transcript	taxon:13686	20060427	Prosite
Prosite	SI.CL.8.cl.820.Contig2	SI.CL.8.cl.820.Contig2		GO:0004252	Prosite:PS00135|Prosite:PDOC00124	IEA		P	Serine proteases, trypsin family, serine active site		transcript	taxon:13686	20060427	Prosite
Prosite	SI.CL.8.cl.820.Contig2	SI.CL.8.cl.820.Contig2		GO:0006508	Prosite:PS00135|Prosite:PDOC00124	IEA		P	Serine proteases, trypsin family, serine active site		transcript	taxon:13686	20060427	Prosite
Prosite	SI.CL.8.cl.844.Contig1	SI.CL.8.cl.844.Contig1		GO:0003723	Prosite:PS00050|Prosite:PDOC00049	IEA		P	Ribosomal protein L23 signature		transcript	taxon:13686	20060427	Prosite
Prosite	SI.CL.8.cl.844.Contig1	SI.CL.8.cl.844.Contig1		GO:0003735	Prosite:PS00050|Prosite:PDOC00049	IEA		P	Ribosomal protein L23 signature		transcript	taxon:13686	20060427	Prosite
Prosite	SI.CL.8.cl.844.Contig1	SI.CL.8.cl.844.Contig1		GO:0006412	Prosite:PS00050|Prosite:PDOC00049	IEA		P	Ribosomal protein L23 signature		transcript	taxon:13686	20060427	Prosite
Prosite	SI.CL.8.cl.844.Contig1	SI.CL.8.cl.844.Contig1		GO:0005622	Prosite:PS00050|Prosite:PDOC00049	IEA		P	Ribosomal protein L23 signature		transcript	taxon:13686	20060427	Prosite
Prosite	SI.CL.8.cl.844.Contig1	SI.CL.8.cl.844.Contig1		GO:0005840	Prosite:PS00050|Prosite:PDOC00049	IEA		P	Ribosomal protein L23 signature		transcript	taxon:13686	20060427	Prosite
Prosite	SI.CL.8.cl.848.Contig1	SI.CL.8.cl.848.Contig1		GO:0004842	Prosite:PS00183|Prosite:PDOC00163	IEA		P	Ubiquitin-conjugating enzymes active site		transcript	taxon:13686	20060427	Prosite
Prosite	SI.CL.8.cl.848.Contig1	SI.CL.8.cl.848.Contig1		GO:0006464	Prosite:PS00183|Prosite:PDOC00163	IEA		P	Ubiquitin-conjugating enzymes active site		transcript	taxon:13686	20060427	Prosite
Prosite	SI.CL.8.cl.848.Contig1	SI.CL.8.cl.848.Contig1		GO:0006512	Prosite:PS00183|Prosite:PDOC00163	IEA		P	Ubiquitin-conjugating enzymes active site		transcript	taxon:13686	20060427	Prosite
Prosite	SI.CL.8.cl.863.Contig1	SI.CL.8.cl.863.Contig1		GO:0006952	Prosite:PS00425|Prosite:PDOC00356	IEA		P	Arthropod defensins signature		transcript	taxon:13686	20060427	Prosite
Prosite	SI.CL.8.cl.871.Contig1	SI.CL.8.cl.871.Contig1		GO:0005525	Prosite:PS01020|Prosite:PDOC00782	IEA		P	SAR1 family signature		transcript	taxon:13686	20060427	Prosite
Prosite	SI.CL.8.cl.871.Contig1	SI.CL.8.cl.871.Contig1		GO:0006886	Prosite:PS01020|Prosite:PDOC00782	IEA		P	SAR1 family signature		transcript	taxon:13686	20060427	Prosite
Prosite	SI.CL.8.cl.871.Contig1	SI.CL.8.cl.871.Contig1		GO:0005622	Prosite:PS01020|Prosite:PDOC00782	IEA		P	SAR1 family signature		transcript	taxon:13686	20060427	Prosite
Prosite	SI.CL.9.cl.900.Contig1	SI.CL.9.cl.900.Contig1		GO:0005489	Prosite:PS00194|Prosite:PDOC00172	IEA		P	Thioredoxin family active site		transcript	taxon:13686	20060427	Prosite
Prosite	SI.CL.9.cl.900.Contig1	SI.CL.9.cl.900.Contig1		GO:0006118	Prosite:PS00194|Prosite:PDOC00172	IEA		P	Thioredoxin family active site		transcript	taxon:13686	20060427	Prosite
Prosite	SI.CL.9.cl.909.Contig1	SI.CL.9.cl.909.Contig1		GO:0004197	Prosite:PS00639|Prosite:PDOC00126	IEA		P	Eukaryotic thiol (cysteine) proteases histidine active site		transcript	taxon:13686	20060427	Prosite
Prosite	SI.CL.9.cl.909.Contig1	SI.CL.9.cl.909.Contig1		GO:0006508	Prosite:PS00639|Prosite:PDOC00126	IEA		P	Eukaryotic thiol (cysteine) proteases histidine active site		transcript	taxon:13686	20060427	Prosite
Prosite	SI.CL.9.cl.936.Contig1	SI.CL.9.cl.936.Contig1		GO:0006886	Prosite:PS00989|Prosite:PDOC00760	IEA		P	Clathrin adaptor complexes small chain signature		transcript	taxon:13686	20060427	Prosite
Prosite	SI.CL.9.cl.936.Contig1	SI.CL.9.cl.936.Contig1		GO:0030125	Prosite:PS00989|Prosite:PDOC00760	IEA		P	Clathrin adaptor complexes small chain signature		transcript	taxon:13686	20060427	Prosite
Prosite	SI.CL.9.cl.953.Contig1	SI.CL.9.cl.953.Contig1		GO:0004252	Prosite:PS00134|Prosite:PDOC00124	IEA		P	Serine proteases, trypsin family, histidine active site		transcript	taxon:13686	20060427	Prosite
Prosite	SI.CL.9.cl.953.Contig1	SI.CL.9.cl.953.Contig1		GO:0006508	Prosite:PS00134|Prosite:PDOC00124	IEA		P	Serine proteases, trypsin family, histidine active site		transcript	taxon:13686	20060427	Prosite
Prosite	SI.CL.9.cl.953.Contig1	SI.CL.9.cl.953.Contig1		GO:0004252	Prosite:PS00135|Prosite:PDOC00124	IEA		P	Serine proteases, trypsin family, serine active site		transcript	taxon:13686	20060427	Prosite
Prosite	SI.CL.9.cl.953.Contig1	SI.CL.9.cl.953.Contig1		GO:0006508	Prosite:PS00135|Prosite:PDOC00124	IEA		P	Serine proteases, trypsin family, serine active site		transcript	taxon:13686	20060427	Prosite
Prosite	SI.CL.9.cl.966.Contig1	SI.CL.9.cl.966.Contig1		GO:0006520	Prosite:PS00165|Prosite:PDOC00149	IEA		P	Serine/threonine dehydratases pyridoxal-phosphate attachment site		transcript	taxon:13686	20060427	Prosite
Prosite	SI.CL.9.cl.992.Contig1	SI.CL.9.cl.992.Contig1		GO:0004175	Prosite:PS00388|Prosite:PDOC00326	IEA		P	Proteasome A-type subunits signature		transcript	taxon:13686	20060427	Prosite
Prosite	SI.CL.9.cl.992.Contig1	SI.CL.9.cl.992.Contig1		GO:0006511	Prosite:PS00388|Prosite:PDOC00326	IEA		P	Proteasome A-type subunits signature		transcript	taxon:13686	20060427	Prosite
Prosite	SI.CL.9.cl.992.Contig1	SI.CL.9.cl.992.Contig1		GO:0005839	Prosite:PS00388|Prosite:PDOC00326	IEA		P	Proteasome A-type subunits signature		transcript	taxon:13686	20060427	Prosite
Prosite	SI.CL.9.cl.992.Contig1	SI.CL.9.cl.992.Contig1		GO:0004175	Prosite:PS00854|Prosite:PDOC00668	IEA		P	Proteasome B-type subunits signature		transcript	taxon:13686	20060427	Prosite
Prosite	SI.CL.9.cl.992.Contig1	SI.CL.9.cl.992.Contig1		GO:0006511	Prosite:PS00854|Prosite:PDOC00668	IEA		P	Proteasome B-type subunits signature		transcript	taxon:13686	20060427	Prosite
Prosite	SI.CL.9.cl.992.Contig1	SI.CL.9.cl.992.Contig1		GO:0005839	Prosite:PS00854|Prosite:PDOC00668	IEA		P	Proteasome B-type subunits signature		transcript	taxon:13686	20060427	Prosite
Prosite	SI.CL.9.cl.992.Contig2	SI.CL.9.cl.992.Contig2		GO:0004175	Prosite:PS00388|Prosite:PDOC00326	IEA		P	Proteasome A-type subunits signature		transcript	taxon:13686	20060427	Prosite
Prosite	SI.CL.9.cl.992.Contig2	SI.CL.9.cl.992.Contig2		GO:0006511	Prosite:PS00388|Prosite:PDOC00326	IEA		P	Proteasome A-type subunits signature		transcript	taxon:13686	20060427	Prosite
Prosite	SI.CL.9.cl.992.Contig2	SI.CL.9.cl.992.Contig2		GO:0005839	Prosite:PS00388|Prosite:PDOC00326	IEA		P	Proteasome A-type subunits signature		transcript	taxon:13686	20060427	Prosite
Prosite	SI.CL.9.cl.992.Contig2	SI.CL.9.cl.992.Contig2		GO:0004175	Prosite:PS00854|Prosite:PDOC00668	IEA		P	Proteasome B-type subunits signature		transcript	taxon:13686	20060427	Prosite
Prosite	SI.CL.9.cl.992.Contig2	SI.CL.9.cl.992.Contig2		GO:0006511	Prosite:PS00854|Prosite:PDOC00668	IEA		P	Proteasome B-type subunits signature		transcript	taxon:13686	20060427	Prosite
Prosite	SI.CL.9.cl.992.Contig2	SI.CL.9.cl.992.Contig2		GO:0005839	Prosite:PS00854|Prosite:PDOC00668	IEA		P	Proteasome B-type subunits signature		transcript	taxon:13686	20060427	Prosite
Prosite	SI.CL.10.cl.1001.Contig2	SI.CL.10.cl.1001.Contig2		GO:0003676	Prosite:PS00039|Prosite:PDOC00039	IEA		P	DEAD-box subfamily ATP-dependent helicases signature		transcript	taxon:13686	20060427	Prosite
Prosite	SI.CL.10.cl.1001.Contig2	SI.CL.10.cl.1001.Contig2		GO:0005524	Prosite:PS00039|Prosite:PDOC00039	IEA		P	DEAD-box subfamily ATP-dependent helicases signature		transcript	taxon:13686	20060427	Prosite
Prosite	SI.CL.10.cl.1001.Contig2	SI.CL.10.cl.1001.Contig2		GO:0008026	Prosite:PS00039|Prosite:PDOC00039	IEA		P	DEAD-box subfamily ATP-dependent helicases signature		transcript	taxon:13686	20060427	Prosite
Prosite	SI.CL.10.cl.1011.Contig1	SI.CL.10.cl.1011.Contig1		GO:0003735	Prosite:PS00962|Prosite:PDOC00744	IEA		P	Ribosomal protein S2 signature 1		transcript	taxon:13686	20060427	Prosite
Prosite	SI.CL.10.cl.1011.Contig1	SI.CL.10.cl.1011.Contig1		GO:0006412	Prosite:PS00962|Prosite:PDOC00744	IEA		P	Ribosomal protein S2 signature 1		transcript	taxon:13686	20060427	Prosite
Prosite	SI.CL.10.cl.1011.Contig1	SI.CL.10.cl.1011.Contig1		GO:0005622	Prosite:PS00962|Prosite:PDOC00744	IEA		P	Ribosomal protein S2 signature 1		transcript	taxon:13686	20060427	Prosite
Prosite	SI.CL.10.cl.1011.Contig1	SI.CL.10.cl.1011.Contig1		GO:0005840	Prosite:PS00962|Prosite:PDOC00744	IEA		P	Ribosomal protein S2 signature 1		transcript	taxon:13686	20060427	Prosite
Prosite	SI.CL.10.cl.1011.Contig1	SI.CL.10.cl.1011.Contig1		GO:0003735	Prosite:PS00963|Prosite:PDOC00744	IEA		P	Ribosomal protein S2 signature 2		transcript	taxon:13686	20060427	Prosite
Prosite	SI.CL.10.cl.1011.Contig1	SI.CL.10.cl.1011.Contig1		GO:0006412	Prosite:PS00963|Prosite:PDOC00744	IEA		P	Ribosomal protein S2 signature 2		transcript	taxon:13686	20060427	Prosite
Prosite	SI.CL.10.cl.1011.Contig1	SI.CL.10.cl.1011.Contig1		GO:0005622	Prosite:PS00963|Prosite:PDOC00744	IEA		P	Ribosomal protein S2 signature 2		transcript	taxon:13686	20060427	Prosite
Prosite	SI.CL.10.cl.1011.Contig1	SI.CL.10.cl.1011.Contig1		GO:0005840	Prosite:PS00963|Prosite:PDOC00744	IEA		P	Ribosomal protein S2 signature 2		transcript	taxon:13686	20060427	Prosite
Prosite	SI.CL.10.cl.1044.Contig1	SI.CL.10.cl.1044.Contig1		GO:0004408	Prosite:PS00821|Prosite:PDOC00647	IEA		P	Cytochrome c and c1 heme lyases signature 1		transcript	taxon:13686	20060427	Prosite
Prosite	SI.CL.10.cl.1044.Contig1	SI.CL.10.cl.1044.Contig1		GO:0005739	Prosite:PS00821|Prosite:PDOC00647	IEA		P	Cytochrome c and c1 heme lyases signature 1		transcript	taxon:13686	20060427	Prosite
Prosite	SI.CL.10.cl.1044.Contig1	SI.CL.10.cl.1044.Contig1		GO:0004408	Prosite:PS00822|Prosite:PDOC00647	IEA		P	Cytochrome c and c1 heme lyases signature 2		transcript	taxon:13686	20060427	Prosite
Prosite	SI.CL.10.cl.1044.Contig1	SI.CL.10.cl.1044.Contig1		GO:0005739	Prosite:PS00822|Prosite:PDOC00647	IEA		P	Cytochrome c and c1 heme lyases signature 2		transcript	taxon:13686	20060427	Prosite
Prosite	SI.CL.10.cl.1068.Contig1	SI.CL.10.cl.1068.Contig1		GO:0005489	Prosite:PS00814|Prosite:PDOC00642	IEA		P	Adrenodoxin family, iron-sulfur binding region signature		transcript	taxon:13686	20060427	Prosite
Prosite	SI.CL.10.cl.1068.Contig1	SI.CL.10.cl.1068.Contig1		GO:0005506	Prosite:PS00814|Prosite:PDOC00642	IEA		P	Adrenodoxin family, iron-sulfur binding region signature		transcript	taxon:13686	20060427	Prosite
Prosite	SI.CL.10.cl.1068.Contig1	SI.CL.10.cl.1068.Contig1		GO:0006118	Prosite:PS00814|Prosite:PDOC00642	IEA		P	Adrenodoxin family, iron-sulfur binding region signature		transcript	taxon:13686	20060427	Prosite
Prosite	SI.CL.10.cl.1086.Contig1	SI.CL.10.cl.1086.Contig1		GO:0003824	Prosite:PS00766|Prosite:PDOC00616	IEA		P	Tetrahydrofolate dehydrogenase/cyclohydrolase signature 1		transcript	taxon:13686	20060427	Prosite
Prosite	SI.CL.10.cl.1086.Contig1	SI.CL.10.cl.1086.Contig1		GO:0009396	Prosite:PS00766|Prosite:PDOC00616	IEA		P	Tetrahydrofolate dehydrogenase/cyclohydrolase signature 1		transcript	taxon:13686	20060427	Prosite
Prosite	SI.CL.10.cl.1087.Contig1	SI.CL.10.cl.1087.Contig1		GO:0005524	Prosite:PS00154|Prosite:PDOC00139	IEA		P	E1-E2 ATPases phosphorylation site		transcript	taxon:13686	20060427	Prosite
Prosite	SI.CL.10.cl.1087.Contig1	SI.CL.10.cl.1087.Contig1		GO:0015662	Prosite:PS00154|Prosite:PDOC00139	IEA		P	E1-E2 ATPases phosphorylation site		transcript	taxon:13686	20060427	Prosite
Prosite	SI.CL.10.cl.1087.Contig1	SI.CL.10.cl.1087.Contig1		GO:0006812	Prosite:PS00154|Prosite:PDOC00139	IEA		P	E1-E2 ATPases phosphorylation site		transcript	taxon:13686	20060427	Prosite
Prosite	SI.CL.10.cl.1087.Contig1	SI.CL.10.cl.1087.Contig1		GO:0016020	Prosite:PS00154|Prosite:PDOC00139	IEA		P	E1-E2 ATPases phosphorylation site		transcript	taxon:13686	20060427	Prosite
Prosite	SI.CL.11.cl.1134.Contig1	SI.CL.11.cl.1134.Contig1		GO:0004866	Prosite:PS00283|Prosite:PDOC00255	IEA		P	Soybean trypsin inhibitor (Kunitz) protease inhibitors family signature		transcript	taxon:13686	20060427	Prosite
Prosite	SI.CL.11.cl.1146.Contig1	SI.CL.11.cl.1146.Contig1		GO:0008152	Prosite:PS00443|Prosite:PDOC00406	IEA		P	Glutamine amidotransferases class-II active site		transcript	taxon:13686	20060427	Prosite
Prosite	SI.CL.11.cl.1146.Contig1	SI.CL.11.cl.1146.Contig1		GO:0004175	Prosite:PS00854|Prosite:PDOC00668	IEA		P	Proteasome B-type subunits signature		transcript	taxon:13686	20060427	Prosite
Prosite	SI.CL.11.cl.1146.Contig1	SI.CL.11.cl.1146.Contig1		GO:0006511	Prosite:PS00854|Prosite:PDOC00668	IEA		P	Proteasome B-type subunits signature		transcript	taxon:13686	20060427	Prosite
Prosite	SI.CL.11.cl.1146.Contig1	SI.CL.11.cl.1146.Contig1		GO:0005839	Prosite:PS00854|Prosite:PDOC00668	IEA		P	Proteasome B-type subunits signature		transcript	taxon:13686	20060427	Prosite
Prosite	SI.CL.11.cl.1153.Contig1	SI.CL.11.cl.1153.Contig1		GO:0004842	Prosite:PS00183|Prosite:PDOC00163	IEA		P	Ubiquitin-conjugating enzymes active site		transcript	taxon:13686	20060427	Prosite
Prosite	SI.CL.11.cl.1153.Contig1	SI.CL.11.cl.1153.Contig1		GO:0006464	Prosite:PS00183|Prosite:PDOC00163	IEA		P	Ubiquitin-conjugating enzymes active site		transcript	taxon:13686	20060427	Prosite
Prosite	SI.CL.11.cl.1153.Contig1	SI.CL.11.cl.1153.Contig1		GO:0006512	Prosite:PS00183|Prosite:PDOC00163	IEA		P	Ubiquitin-conjugating enzymes active site		transcript	taxon:13686	20060427	Prosite
Prosite	SI.CL.11.cl.1170.Contig1	SI.CL.11.cl.1170.Contig1		GO:0016491	Prosite:PS00067|Prosite:PDOC00065	IEA		P	3-hydroxyacyl-CoA dehydrogenase signature		transcript	taxon:13686	20060427	Prosite
Prosite	SI.CL.11.cl.1170.Contig1	SI.CL.11.cl.1170.Contig1		GO:0006631	Prosite:PS00067|Prosite:PDOC00065	IEA		P	3-hydroxyacyl-CoA dehydrogenase signature		transcript	taxon:13686	20060427	Prosite
Prosite	SI.CL.11.cl.1184.Contig1	SI.CL.11.cl.1184.Contig1		GO:0005554	Prosite:PS01152|Prosite:PDOC00887	IEA		P	Hypothetical hesB/yadR/yfhF family signature		transcript	taxon:13686	20060427	Prosite
Prosite	SI.CL.12.cl.1209.Contig1	SI.CL.12.cl.1209.Contig1		GO:0016491	Prosite:PS00470|Prosite:PDOC00389	IEA		P	Isocitrate and isopropylmalate dehydrogenases signature		transcript	taxon:13686	20060427	Prosite
Prosite	SI.CL.12.cl.1209.Contig1	SI.CL.12.cl.1209.Contig1		GO:0008152	Prosite:PS00470|Prosite:PDOC00389	IEA		P	Isocitrate and isopropylmalate dehydrogenases signature		transcript	taxon:13686	20060427	Prosite
Prosite	SI.CL.12.cl.1215.Contig1	SI.CL.12.cl.1215.Contig1		GO:0006457	Prosite:PS00170|Prosite:PDOC00154	IEA		P	Cyclophilin-type peptidyl-prolyl cis-trans isomerase signature		transcript	taxon:13686	20060427	Prosite
Prosite	SI.CL.12.cl.1225.Contig1	SI.CL.12.cl.1225.Contig1		GO:0003746	Prosite:PS00824|Prosite:PDOC00648	IEA		P	Elongation factor 1 beta/beta'/delta chain signature 1		transcript	taxon:13686	20060427	Prosite
Prosite	SI.CL.12.cl.1225.Contig1	SI.CL.12.cl.1225.Contig1		GO:0006414	Prosite:PS00824|Prosite:PDOC00648	IEA		P	Elongation factor 1 beta/beta'/delta chain signature 1		transcript	taxon:13686	20060427	Prosite
Prosite	SI.CL.12.cl.1225.Contig1	SI.CL.12.cl.1225.Contig1		GO:0005853	Prosite:PS00824|Prosite:PDOC00648	IEA		P	Elongation factor 1 beta/beta'/delta chain signature 1		transcript	taxon:13686	20060427	Prosite
Prosite	SI.CL.12.cl.1231.Contig1	SI.CL.12.cl.1231.Contig1		GO:0004639	Prosite:PS01057|Prosite:PDOC00810	IEA		P	SAICAR synthetase signature 1		transcript	taxon:13686	20060427	Prosite
Prosite	SI.CL.12.cl.1231.Contig1	SI.CL.12.cl.1231.Contig1		GO:0006164	Prosite:PS01057|Prosite:PDOC00810	IEA		P	SAICAR synthetase signature 1		transcript	taxon:13686	20060427	Prosite
Prosite	SI.CL.12.cl.1236.Contig1	SI.CL.12.cl.1236.Contig1		GO:0003735	Prosite:PS00585|Prosite:PDOC00505	IEA		P	Ribosomal protein S5 signature		transcript	taxon:13686	20060427	Prosite
Prosite	SI.CL.12.cl.1236.Contig1	SI.CL.12.cl.1236.Contig1		GO:0006412	Prosite:PS00585|Prosite:PDOC00505	IEA		P	Ribosomal protein S5 signature		transcript	taxon:13686	20060427	Prosite
Prosite	SI.CL.12.cl.1236.Contig1	SI.CL.12.cl.1236.Contig1		GO:0005622	Prosite:PS00585|Prosite:PDOC00505	IEA		P	Ribosomal protein S5 signature		transcript	taxon:13686	20060427	Prosite
Prosite	SI.CL.12.cl.1236.Contig1	SI.CL.12.cl.1236.Contig1		GO:0005840	Prosite:PS00585|Prosite:PDOC00505	IEA		P	Ribosomal protein S5 signature		transcript	taxon:13686	20060427	Prosite
Prosite	SI.CL.12.cl.1251.Contig1	SI.CL.12.cl.1251.Contig1		GO:0006464	Prosite:PS00299|Prosite:PDOC00271	IEA		P	Ubiquitin domain signature		transcript	taxon:13686	20060427	Prosite
Prosite	SI.CL.12.cl.1267.Contig1	SI.CL.12.cl.1267.Contig1		GO:0003735	Prosite:PS00323|Prosite:PDOC00288	IEA		P	Ribosomal protein S19 signature		transcript	taxon:13686	20060427	Prosite
Prosite	SI.CL.12.cl.1267.Contig1	SI.CL.12.cl.1267.Contig1		GO:0006412	Prosite:PS00323|Prosite:PDOC00288	IEA		P	Ribosomal protein S19 signature		transcript	taxon:13686	20060427	Prosite
Prosite	SI.CL.12.cl.1267.Contig1	SI.CL.12.cl.1267.Contig1		GO:0005622	Prosite:PS00323|Prosite:PDOC00288	IEA		P	Ribosomal protein S19 signature		transcript	taxon:13686	20060427	Prosite
Prosite	SI.CL.12.cl.1267.Contig1	SI.CL.12.cl.1267.Contig1		GO:0005840	Prosite:PS00323|Prosite:PDOC00288	IEA		P	Ribosomal protein S19 signature		transcript	taxon:13686	20060427	Prosite
Prosite	SI.CL.12.cl.1279.Contig1	SI.CL.12.cl.1279.Contig1		GO:0005524	Prosite:PS00152|Prosite:PDOC00137	IEA		P	ATP synthase alpha and beta subunits signature		transcript	taxon:13686	20060427	Prosite
Prosite	SI.CL.12.cl.1279.Contig1	SI.CL.12.cl.1279.Contig1		GO:0046933	Prosite:PS00152|Prosite:PDOC00137	IEA		P	ATP synthase alpha and beta subunits signature		transcript	taxon:13686	20060427	Prosite
Prosite	SI.CL.12.cl.1279.Contig1	SI.CL.12.cl.1279.Contig1		GO:0046961	Prosite:PS00152|Prosite:PDOC00137	IEA		P	ATP synthase alpha and beta subunits signature		transcript	taxon:13686	20060427	Prosite
Prosite	SI.CL.12.cl.1279.Contig1	SI.CL.12.cl.1279.Contig1		GO:0015986	Prosite:PS00152|Prosite:PDOC00137	IEA		P	ATP synthase alpha and beta subunits signature		transcript	taxon:13686	20060427	Prosite
Prosite	SI.CL.12.cl.1279.Contig1	SI.CL.12.cl.1279.Contig1		GO:0016469	Prosite:PS00152|Prosite:PDOC00137	IEA		P	ATP synthase alpha and beta subunits signature		transcript	taxon:13686	20060427	Prosite
Prosite	SI.CL.12.cl.1291.Contig1	SI.CL.12.cl.1291.Contig1		GO:0003824	Prosite:PS00120|Prosite:PDOC00110	IEA		P	Lipases, serine active site		transcript	taxon:13686	20060427	Prosite
Prosite	SI.CL.12.cl.1291.Contig2	SI.CL.12.cl.1291.Contig2		GO:0003824	Prosite:PS00120|Prosite:PDOC00110	IEA		P	Lipases, serine active site		transcript	taxon:13686	20060427	Prosite
Prosite	SI.CL.12.cl.1295.Contig1	SI.CL.12.cl.1295.Contig1		GO:0005554	Prosite:PS01049|Prosite:PDOC00806	IEA		P	Uncharacterized protein family UPF0031 signature 1		transcript	taxon:13686	20060427	Prosite
Prosite	SI.CL.13.cl.1309.Contig1	SI.CL.13.cl.1309.Contig1		GO:0005489	Prosite:PS00194|Prosite:PDOC00172	IEA		P	Thioredoxin family active site		transcript	taxon:13686	20060427	Prosite
Prosite	SI.CL.13.cl.1309.Contig1	SI.CL.13.cl.1309.Contig1		GO:0006118	Prosite:PS00194|Prosite:PDOC00172	IEA		P	Thioredoxin family active site		transcript	taxon:13686	20060427	Prosite
Prosite	SI.CL.13.cl.1338.Contig1	SI.CL.13.cl.1338.Contig1		GO:0006464	Prosite:PS00299|Prosite:PDOC00271	IEA		P	Ubiquitin domain signature		transcript	taxon:13686	20060427	Prosite
Prosite	SI.CL.13.cl.1340.Contig1	SI.CL.13.cl.1340.Contig1		GO:0003746	Prosite:PS00825|Prosite:PDOC00648	IEA		P	Elongation factor 1 beta/beta'/delta chain signature 2		transcript	taxon:13686	20060427	Prosite
Prosite	SI.CL.13.cl.1340.Contig1	SI.CL.13.cl.1340.Contig1		GO:0006414	Prosite:PS00825|Prosite:PDOC00648	IEA		P	Elongation factor 1 beta/beta'/delta chain signature 2		transcript	taxon:13686	20060427	Prosite
Prosite	SI.CL.13.cl.1340.Contig1	SI.CL.13.cl.1340.Contig1		GO:0005853	Prosite:PS00825|Prosite:PDOC00648	IEA		P	Elongation factor 1 beta/beta'/delta chain signature 2		transcript	taxon:13686	20060427	Prosite
Prosite	SI.CL.13.cl.1343.Contig1	SI.CL.13.cl.1343.Contig1		GO:0004602	Prosite:PS00460|Prosite:PDOC00396	IEA		P	Glutathione peroxidases active site		transcript	taxon:13686	20060427	Prosite
Prosite	SI.CL.13.cl.1343.Contig1	SI.CL.13.cl.1343.Contig1		GO:0006979	Prosite:PS00460|Prosite:PDOC00396	IEA		P	Glutathione peroxidases active site		transcript	taxon:13686	20060427	Prosite
Prosite	SI.CL.13.cl.1343.Contig1	SI.CL.13.cl.1343.Contig1		GO:0004602	Prosite:PS00763|Prosite:PDOC00396	IEA		P	Glutathione peroxidases signature 2		transcript	taxon:13686	20060427	Prosite
Prosite	SI.CL.13.cl.1343.Contig1	SI.CL.13.cl.1343.Contig1		GO:0006979	Prosite:PS00763|Prosite:PDOC00396	IEA		P	Glutathione peroxidases signature 2		transcript	taxon:13686	20060427	Prosite
Prosite	SI.CL.13.cl.1359.Contig1	SI.CL.13.cl.1359.Contig1		GO:0016491	Prosite:PS00061|Prosite:PDOC00060	IEA		P	Short-chain dehydrogenases/reductases family signature		transcript	taxon:13686	20060427	Prosite
Prosite	SI.CL.13.cl.1359.Contig1	SI.CL.13.cl.1359.Contig1		GO:0008152	Prosite:PS00061|Prosite:PDOC00060	IEA		P	Short-chain dehydrogenases/reductases family signature		transcript	taxon:13686	20060427	Prosite
Prosite	SI.CL.13.cl.1364.Contig1	SI.CL.13.cl.1364.Contig1		GO:0004842	Prosite:PS00183|Prosite:PDOC00163	IEA		P	Ubiquitin-conjugating enzymes active site		transcript	taxon:13686	20060427	Prosite
Prosite	SI.CL.13.cl.1364.Contig1	SI.CL.13.cl.1364.Contig1		GO:0006464	Prosite:PS00183|Prosite:PDOC00163	IEA		P	Ubiquitin-conjugating enzymes active site		transcript	taxon:13686	20060427	Prosite
Prosite	SI.CL.13.cl.1364.Contig1	SI.CL.13.cl.1364.Contig1		GO:0006512	Prosite:PS00183|Prosite:PDOC00163	IEA		P	Ubiquitin-conjugating enzymes active site		transcript	taxon:13686	20060427	Prosite
Prosite	SI.CL.13.cl.1367.Contig1	SI.CL.13.cl.1367.Contig1		GO:0005184	Prosite:PS00539|Prosite:PDOC00466	IEA		P	Pyrokinins signature		transcript	taxon:13686	20060427	Prosite
Prosite	SI.CL.13.cl.1367.Contig1	SI.CL.13.cl.1367.Contig1		GO:0007218	Prosite:PS00539|Prosite:PDOC00466	IEA		P	Pyrokinins signature		transcript	taxon:13686	20060427	Prosite
Prosite	SI.CL.13.cl.1385.Contig1	SI.CL.13.cl.1385.Contig1		GO:0005975	Prosite:PS00958|Prosite:PDOC00741	IEA		P	Transaldolase active site		transcript	taxon:13686	20060427	Prosite
Prosite	SI.CL.13.cl.1387.Contig1	SI.CL.13.cl.1387.Contig1		GO:0008236	Prosite:PS00501|Prosite:PDOC00418	IEA		P	Signal peptidases I serine active site		transcript	taxon:13686	20060427	Prosite
Prosite	SI.CL.13.cl.1387.Contig1	SI.CL.13.cl.1387.Contig1		GO:0006508	Prosite:PS00501|Prosite:PDOC00418	IEA		P	Signal peptidases I serine active site		transcript	taxon:13686	20060427	Prosite
Prosite	SI.CL.13.cl.1387.Contig1	SI.CL.13.cl.1387.Contig1		GO:0016020	Prosite:PS00501|Prosite:PDOC00418	IEA		P	Signal peptidases I serine active site		transcript	taxon:13686	20060427	Prosite
Prosite	SI.CL.13.cl.1387.Contig1	SI.CL.13.cl.1387.Contig1		GO:0008236	Prosite:PS00761|Prosite:PDOC00418	IEA		P	Signal peptidases I signature 3		transcript	taxon:13686	20060427	Prosite
Prosite	SI.CL.13.cl.1387.Contig1	SI.CL.13.cl.1387.Contig1		GO:0006508	Prosite:PS00761|Prosite:PDOC00418	IEA		P	Signal peptidases I signature 3		transcript	taxon:13686	20060427	Prosite
Prosite	SI.CL.13.cl.1387.Contig1	SI.CL.13.cl.1387.Contig1		GO:0016020	Prosite:PS00761|Prosite:PDOC00418	IEA		P	Signal peptidases I signature 3		transcript	taxon:13686	20060427	Prosite
Prosite	SI.CL.13.cl.1388.Contig1	SI.CL.13.cl.1388.Contig1		GO:0005489	Prosite:PS00194|Prosite:PDOC00172	IEA		P	Thioredoxin family active site		transcript	taxon:13686	20060427	Prosite
Prosite	SI.CL.13.cl.1388.Contig1	SI.CL.13.cl.1388.Contig1		GO:0006118	Prosite:PS00194|Prosite:PDOC00172	IEA		P	Thioredoxin family active site		transcript	taxon:13686	20060427	Prosite
Prosite	SI.CL.14.cl.1413.Contig1	SI.CL.14.cl.1413.Contig1		GO:0004289	Prosite:PS00137|Prosite:PDOC00125	IEA		P	Serine proteases, subtilase family, histidine active site		transcript	taxon:13686	20060427	Prosite
Prosite	SI.CL.14.cl.1413.Contig1	SI.CL.14.cl.1413.Contig1		GO:0006508	Prosite:PS00137|Prosite:PDOC00125	IEA		P	Serine proteases, subtilase family, histidine active site		transcript	taxon:13686	20060427	Prosite
Prosite	SI.CL.14.cl.1417.Contig1	SI.CL.14.cl.1417.Contig1		GO:0003735	Prosite:PS00054|Prosite:PDOC00053	IEA		P	Ribosomal protein S11 signature		transcript	taxon:13686	20060427	Prosite
Prosite	SI.CL.14.cl.1417.Contig1	SI.CL.14.cl.1417.Contig1		GO:0006412	Prosite:PS00054|Prosite:PDOC00053	IEA		P	Ribosomal protein S11 signature		transcript	taxon:13686	20060427	Prosite
Prosite	SI.CL.14.cl.1417.Contig1	SI.CL.14.cl.1417.Contig1		GO:0005622	Prosite:PS00054|Prosite:PDOC00053	IEA		P	Ribosomal protein S11 signature		transcript	taxon:13686	20060427	Prosite
Prosite	SI.CL.14.cl.1417.Contig1	SI.CL.14.cl.1417.Contig1		GO:0005840	Prosite:PS00054|Prosite:PDOC00053	IEA		P	Ribosomal protein S11 signature		transcript	taxon:13686	20060427	Prosite
Prosite	SI.CL.14.cl.1452.Contig1	SI.CL.14.cl.1452.Contig1		GO:0003735	Prosite:PS00634|Prosite:PDOC00551	IEA		P	Ribosomal protein L30 signature		transcript	taxon:13686	20060427	Prosite
Prosite	SI.CL.14.cl.1452.Contig1	SI.CL.14.cl.1452.Contig1		GO:0006412	Prosite:PS00634|Prosite:PDOC00551	IEA		P	Ribosomal protein L30 signature		transcript	taxon:13686	20060427	Prosite
Prosite	SI.CL.14.cl.1452.Contig1	SI.CL.14.cl.1452.Contig1		GO:0005622	Prosite:PS00634|Prosite:PDOC00551	IEA		P	Ribosomal protein L30 signature		transcript	taxon:13686	20060427	Prosite
Prosite	SI.CL.14.cl.1452.Contig1	SI.CL.14.cl.1452.Contig1		GO:0005840	Prosite:PS00634|Prosite:PDOC00551	IEA		P	Ribosomal protein L30 signature		transcript	taxon:13686	20060427	Prosite
Prosite	SI.CL.14.cl.1463.Contig1	SI.CL.14.cl.1463.Contig1		GO:0005524	Prosite:PS00867|Prosite:PDOC00676	IEA		P	Carbamoyl-phosphate synthase subdomain signature 2		transcript	taxon:13686	20060427	Prosite
Prosite	SI.CL.14.cl.1469.Contig1	SI.CL.14.cl.1469.Contig1		GO:0004497	Prosite:PS00086|Prosite:PDOC00081	IEA		P	Cytochrome P450 cysteine heme-iron ligand signature		transcript	taxon:13686	20060427	Prosite
Prosite	SI.CL.14.cl.1469.Contig1	SI.CL.14.cl.1469.Contig1		GO:0005506	Prosite:PS00086|Prosite:PDOC00081	IEA		P	Cytochrome P450 cysteine heme-iron ligand signature		transcript	taxon:13686	20060427	Prosite
Prosite	SI.CL.14.cl.1469.Contig1	SI.CL.14.cl.1469.Contig1		GO:0020037	Prosite:PS00086|Prosite:PDOC00081	IEA		P	Cytochrome P450 cysteine heme-iron ligand signature		transcript	taxon:13686	20060427	Prosite
Prosite	SI.CL.14.cl.1469.Contig1	SI.CL.14.cl.1469.Contig1		GO:0006118	Prosite:PS00086|Prosite:PDOC00081	IEA		P	Cytochrome P450 cysteine heme-iron ligand signature		transcript	taxon:13686	20060427	Prosite
Prosite	SI.CL.14.cl.1472.Contig1	SI.CL.14.cl.1472.Contig1		GO:0042254	Prosite:PS01082|Prosite:PDOC00831	IEA		P	Ribosomal protein L7Ae signature		transcript	taxon:13686	20060427	Prosite
Prosite	SI.CL.14.cl.1472.Contig1	SI.CL.14.cl.1472.Contig1		GO:0030529	Prosite:PS01082|Prosite:PDOC00831	IEA		P	Ribosomal protein L7Ae signature		transcript	taxon:13686	20060427	Prosite
Prosite	SI.CL.15.cl.1540.Contig1	SI.CL.15.cl.1540.Contig1		GO:0005524	Prosite:PS00152|Prosite:PDOC00137	IEA		P	ATP synthase alpha and beta subunits signature		transcript	taxon:13686	20060427	Prosite
Prosite	SI.CL.15.cl.1540.Contig1	SI.CL.15.cl.1540.Contig1		GO:0046933	Prosite:PS00152|Prosite:PDOC00137	IEA		P	ATP synthase alpha and beta subunits signature		transcript	taxon:13686	20060427	Prosite
Prosite	SI.CL.15.cl.1540.Contig1	SI.CL.15.cl.1540.Contig1		GO:0046961	Prosite:PS00152|Prosite:PDOC00137	IEA		P	ATP synthase alpha and beta subunits signature		transcript	taxon:13686	20060427	Prosite
Prosite	SI.CL.15.cl.1540.Contig1	SI.CL.15.cl.1540.Contig1		GO:0015986	Prosite:PS00152|Prosite:PDOC00137	IEA		P	ATP synthase alpha and beta subunits signature		transcript	taxon:13686	20060427	Prosite
Prosite	SI.CL.15.cl.1540.Contig1	SI.CL.15.cl.1540.Contig1		GO:0016469	Prosite:PS00152|Prosite:PDOC00137	IEA		P	ATP synthase alpha and beta subunits signature		transcript	taxon:13686	20060427	Prosite
Prosite	SI.CL.15.cl.1544.Contig1	SI.CL.15.cl.1544.Contig1		GO:0004842	Prosite:PS00183|Prosite:PDOC00163	IEA		P	Ubiquitin-conjugating enzymes active site		transcript	taxon:13686	20060427	Prosite
Prosite	SI.CL.15.cl.1544.Contig1	SI.CL.15.cl.1544.Contig1		GO:0006464	Prosite:PS00183|Prosite:PDOC00163	IEA		P	Ubiquitin-conjugating enzymes active site		transcript	taxon:13686	20060427	Prosite
Prosite	SI.CL.15.cl.1544.Contig1	SI.CL.15.cl.1544.Contig1		GO:0006512	Prosite:PS00183|Prosite:PDOC00163	IEA		P	Ubiquitin-conjugating enzymes active site		transcript	taxon:13686	20060427	Prosite
Prosite	SI.CL.15.cl.1561.Contig1	SI.CL.15.cl.1561.Contig1		GO:0046933	Prosite:PS00605|Prosite:PDOC00526	IEA		P	ATP synthase c subunit signature		transcript	taxon:13686	20060427	Prosite
Prosite	SI.CL.15.cl.1561.Contig1	SI.CL.15.cl.1561.Contig1		GO:0046961	Prosite:PS00605|Prosite:PDOC00526	IEA		P	ATP synthase c subunit signature		transcript	taxon:13686	20060427	Prosite
Prosite	SI.CL.15.cl.1561.Contig1	SI.CL.15.cl.1561.Contig1		GO:0015986	Prosite:PS00605|Prosite:PDOC00526	IEA		P	ATP synthase c subunit signature		transcript	taxon:13686	20060427	Prosite
Prosite	SI.CL.15.cl.1561.Contig1	SI.CL.15.cl.1561.Contig1		GO:0016020	Prosite:PS00605|Prosite:PDOC00526	IEA		P	ATP synthase c subunit signature		transcript	taxon:13686	20060427	Prosite
Prosite	SI.CL.15.cl.1561.Contig1	SI.CL.15.cl.1561.Contig1		GO:0016469	Prosite:PS00605|Prosite:PDOC00526	IEA		P	ATP synthase c subunit signature		transcript	taxon:13686	20060427	Prosite
Prosite	SI.CL.16.cl.1623.Contig1	SI.CL.16.cl.1623.Contig1		GO:0003735	Prosite:PS01172|Prosite:PDOC00902	IEA		P	Ribosomal protein L44e signature		transcript	taxon:13686	20060427	Prosite
Prosite	SI.CL.16.cl.1623.Contig1	SI.CL.16.cl.1623.Contig1		GO:0006412	Prosite:PS01172|Prosite:PDOC00902	IEA		P	Ribosomal protein L44e signature		transcript	taxon:13686	20060427	Prosite
Prosite	SI.CL.16.cl.1623.Contig1	SI.CL.16.cl.1623.Contig1		GO:0005622	Prosite:PS01172|Prosite:PDOC00902	IEA		P	Ribosomal protein L44e signature		transcript	taxon:13686	20060427	Prosite
Prosite	SI.CL.16.cl.1623.Contig1	SI.CL.16.cl.1623.Contig1		GO:0005840	Prosite:PS01172|Prosite:PDOC00902	IEA		P	Ribosomal protein L44e signature		transcript	taxon:13686	20060427	Prosite
Prosite	SI.CL.16.cl.1626.Contig1	SI.CL.16.cl.1626.Contig1		GO:0005529	Prosite:PS00615|Prosite:PDOC00537	IEA		P	C-type lectin domain signature		transcript	taxon:13686	20060427	Prosite
Prosite	SI.CL.16.cl.1663.Contig1	SI.CL.16.cl.1663.Contig1		GO:0004784	Prosite:PS00088|Prosite:PDOC00083	IEA		P	Manganese and iron superoxide dismutases signature		transcript	taxon:13686	20060427	Prosite
Prosite	SI.CL.16.cl.1663.Contig1	SI.CL.16.cl.1663.Contig1		GO:0046872	Prosite:PS00088|Prosite:PDOC00083	IEA		P	Manganese and iron superoxide dismutases signature		transcript	taxon:13686	20060427	Prosite
Prosite	SI.CL.16.cl.1663.Contig1	SI.CL.16.cl.1663.Contig1		GO:0006801	Prosite:PS00088|Prosite:PDOC00083	IEA		P	Manganese and iron superoxide dismutases signature		transcript	taxon:13686	20060427	Prosite
Prosite	SI.CL.16.cl.1664.Contig1	SI.CL.16.cl.1664.Contig1		GO:0003735	Prosite:PS01108|Prosite:PDOC00852	IEA		P	Ribosomal protein L24 signature		transcript	taxon:13686	20060427	Prosite
Prosite	SI.CL.16.cl.1664.Contig1	SI.CL.16.cl.1664.Contig1		GO:0006412	Prosite:PS01108|Prosite:PDOC00852	IEA		P	Ribosomal protein L24 signature		transcript	taxon:13686	20060427	Prosite
Prosite	SI.CL.16.cl.1664.Contig1	SI.CL.16.cl.1664.Contig1		GO:0005622	Prosite:PS01108|Prosite:PDOC00852	IEA		P	Ribosomal protein L24 signature		transcript	taxon:13686	20060427	Prosite
Prosite	SI.CL.16.cl.1664.Contig1	SI.CL.16.cl.1664.Contig1		GO:0005840	Prosite:PS01108|Prosite:PDOC00852	IEA		P	Ribosomal protein L24 signature		transcript	taxon:13686	20060427	Prosite
Prosite	SI.CL.16.cl.1682.Contig1	SI.CL.16.cl.1682.Contig1		GO:0003735	Prosite:PS00628|Prosite:PDOC00546	IEA		P	Ribosomal protein S19e signature		transcript	taxon:13686	20060427	Prosite
Prosite	SI.CL.16.cl.1682.Contig1	SI.CL.16.cl.1682.Contig1		GO:0006412	Prosite:PS00628|Prosite:PDOC00546	IEA		P	Ribosomal protein S19e signature		transcript	taxon:13686	20060427	Prosite
Prosite	SI.CL.16.cl.1682.Contig1	SI.CL.16.cl.1682.Contig1		GO:0005622	Prosite:PS00628|Prosite:PDOC00546	IEA		P	Ribosomal protein S19e signature		transcript	taxon:13686	20060427	Prosite
Prosite	SI.CL.16.cl.1682.Contig1	SI.CL.16.cl.1682.Contig1		GO:0005840	Prosite:PS00628|Prosite:PDOC00546	IEA		P	Ribosomal protein S19e signature		transcript	taxon:13686	20060427	Prosite
Prosite	SI.CL.16.cl.1685.Contig1	SI.CL.16.cl.1685.Contig1		GO:0003676	Prosite:PS00028|Prosite:PDOC00028	IEA		P	Zinc finger C2H2 type domain signature		transcript	taxon:13686	20060427	Prosite
Prosite	SI.CL.16.cl.1685.Contig1	SI.CL.16.cl.1685.Contig1		GO:0008270	Prosite:PS00028|Prosite:PDOC00028	IEA		P	Zinc finger C2H2 type domain signature		transcript	taxon:13686	20060427	Prosite
Prosite	SI.CL.16.cl.1685.Contig1	SI.CL.16.cl.1685.Contig1		GO:0005634	Prosite:PS00028|Prosite:PDOC00028	IEA		P	Zinc finger C2H2 type domain signature		transcript	taxon:13686	20060427	Prosite
Prosite	SI.CL.16.cl.1685.Contig1	SI.CL.16.cl.1685.Contig1		GO:0003676	Prosite:PS01070|Prosite:PDOC00821	IEA		P	DNA/RNA non-specific endonucleases active site		transcript	taxon:13686	20060427	Prosite
Prosite	SI.CL.16.cl.1685.Contig1	SI.CL.16.cl.1685.Contig1		GO:0004519	Prosite:PS01070|Prosite:PDOC00821	IEA		P	DNA/RNA non-specific endonucleases active site		transcript	taxon:13686	20060427	Prosite
Prosite	SI.CL.16.cl.1685.Contig2	SI.CL.16.cl.1685.Contig2		GO:0003676	Prosite:PS01070|Prosite:PDOC00821	IEA		P	DNA/RNA non-specific endonucleases active site		transcript	taxon:13686	20060427	Prosite
Prosite	SI.CL.16.cl.1685.Contig2	SI.CL.16.cl.1685.Contig2		GO:0004519	Prosite:PS01070|Prosite:PDOC00821	IEA		P	DNA/RNA non-specific endonucleases active site		transcript	taxon:13686	20060427	Prosite
Prosite	SI.CL.16.cl.1694.Contig1	SI.CL.16.cl.1694.Contig1		GO:0003735	Prosite:PS00578|Prosite:PDOC00500	IEA		P	Ribosomal protein S6e signature		transcript	taxon:13686	20060427	Prosite
Prosite	SI.CL.16.cl.1694.Contig1	SI.CL.16.cl.1694.Contig1		GO:0006412	Prosite:PS00578|Prosite:PDOC00500	IEA		P	Ribosomal protein S6e signature		transcript	taxon:13686	20060427	Prosite
Prosite	SI.CL.16.cl.1694.Contig1	SI.CL.16.cl.1694.Contig1		GO:0005622	Prosite:PS00578|Prosite:PDOC00500	IEA		P	Ribosomal protein S6e signature		transcript	taxon:13686	20060427	Prosite
Prosite	SI.CL.16.cl.1694.Contig1	SI.CL.16.cl.1694.Contig1		GO:0005840	Prosite:PS00578|Prosite:PDOC00500	IEA		P	Ribosomal protein S6e signature		transcript	taxon:13686	20060427	Prosite
Prosite	SI.CL.17.cl.1703.Contig1	SI.CL.17.cl.1703.Contig1		GO:0016616	Prosite:PS00671|Prosite:PDOC00063	IEA		P	D-isomer specific 2-hydroxyacid dehydrogenases signature 3		transcript	taxon:13686	20060427	Prosite
Prosite	SI.CL.17.cl.1703.Contig1	SI.CL.17.cl.1703.Contig1		GO:0006564	Prosite:PS00671|Prosite:PDOC00063	IEA		P	D-isomer specific 2-hydroxyacid dehydrogenases signature 3		transcript	taxon:13686	20060427	Prosite
Prosite	SI.CL.17.cl.1714.Contig1	SI.CL.17.cl.1714.Contig1		GO:0006886	Prosite:PS00989|Prosite:PDOC00760	IEA		P	Clathrin adaptor complexes small chain signature		transcript	taxon:13686	20060427	Prosite
Prosite	SI.CL.17.cl.1714.Contig1	SI.CL.17.cl.1714.Contig1		GO:0030125	Prosite:PS00989|Prosite:PDOC00760	IEA		P	Clathrin adaptor complexes small chain signature		transcript	taxon:13686	20060427	Prosite
Prosite	SI.CL.17.cl.1725.Contig1	SI.CL.17.cl.1725.Contig1		GO:0003777	Prosite:PS01239|Prosite:PDOC00953	IEA		P	Dynein light chain type 1 signature		transcript	taxon:13686	20060427	Prosite
Prosite	SI.CL.17.cl.1725.Contig1	SI.CL.17.cl.1725.Contig1		GO:0007017	Prosite:PS01239|Prosite:PDOC00953	IEA		P	Dynein light chain type 1 signature		transcript	taxon:13686	20060427	Prosite
Prosite	SI.CL.17.cl.1725.Contig1	SI.CL.17.cl.1725.Contig1		GO:0005875	Prosite:PS01239|Prosite:PDOC00953	IEA		P	Dynein light chain type 1 signature		transcript	taxon:13686	20060427	Prosite
Prosite	SI.CL.17.cl.1745.Contig1	SI.CL.17.cl.1745.Contig1		GO:0003723	Prosite:PS00646|Prosite:PDOC00556	IEA		P	Ribosomal protein S13 signature		transcript	taxon:13686	20060427	Prosite
Prosite	SI.CL.17.cl.1745.Contig1	SI.CL.17.cl.1745.Contig1		GO:0003735	Prosite:PS00646|Prosite:PDOC00556	IEA		P	Ribosomal protein S13 signature		transcript	taxon:13686	20060427	Prosite
Prosite	SI.CL.17.cl.1745.Contig1	SI.CL.17.cl.1745.Contig1		GO:0006412	Prosite:PS00646|Prosite:PDOC00556	IEA		P	Ribosomal protein S13 signature		transcript	taxon:13686	20060427	Prosite
Prosite	SI.CL.17.cl.1745.Contig1	SI.CL.17.cl.1745.Contig1		GO:0005622	Prosite:PS00646|Prosite:PDOC00556	IEA		P	Ribosomal protein S13 signature		transcript	taxon:13686	20060427	Prosite
Prosite	SI.CL.17.cl.1745.Contig1	SI.CL.17.cl.1745.Contig1		GO:0005840	Prosite:PS00646|Prosite:PDOC00556	IEA		P	Ribosomal protein S13 signature		transcript	taxon:13686	20060427	Prosite
Prosite	SI.CL.17.cl.1746.Contig1	SI.CL.17.cl.1746.Contig1		GO:0016491	Prosite:PS00061|Prosite:PDOC00060	IEA		P	Short-chain dehydrogenases/reductases family signature		transcript	taxon:13686	20060427	Prosite
Prosite	SI.CL.17.cl.1746.Contig1	SI.CL.17.cl.1746.Contig1		GO:0008152	Prosite:PS00061|Prosite:PDOC00060	IEA		P	Short-chain dehydrogenases/reductases family signature		transcript	taxon:13686	20060427	Prosite
Prosite	SI.CL.17.cl.1757.Contig1	SI.CL.17.cl.1757.Contig1		GO:0000062	Prosite:PS00880|Prosite:PDOC00686	IEA		P	Acyl-CoA-binding protein signature		transcript	taxon:13686	20060427	Prosite
Prosite	SI.CL.17.cl.1759.Contig1	SI.CL.17.cl.1759.Contig1		GO:0005509	Prosite:PS00018|Prosite:PDOC00018	IEA		P	EF-hand calcium-binding domain		transcript	taxon:13686	20060427	Prosite
Prosite	SI.CL.17.cl.1781.Contig1	SI.CL.17.cl.1781.Contig1		GO:0003735	Prosite:PS00056|Prosite:PDOC00055	IEA		P	Ribosomal protein S17 signature		transcript	taxon:13686	20060427	Prosite
Prosite	SI.CL.17.cl.1781.Contig1	SI.CL.17.cl.1781.Contig1		GO:0006412	Prosite:PS00056|Prosite:PDOC00055	IEA		P	Ribosomal protein S17 signature		transcript	taxon:13686	20060427	Prosite
Prosite	SI.CL.17.cl.1781.Contig1	SI.CL.17.cl.1781.Contig1		GO:0005622	Prosite:PS00056|Prosite:PDOC00055	IEA		P	Ribosomal protein S17 signature		transcript	taxon:13686	20060427	Prosite
Prosite	SI.CL.17.cl.1781.Contig1	SI.CL.17.cl.1781.Contig1		GO:0005840	Prosite:PS00056|Prosite:PDOC00055	IEA		P	Ribosomal protein S17 signature		transcript	taxon:13686	20060427	Prosite
Prosite	SI.CL.18.cl.1800.Contig1	SI.CL.18.cl.1800.Contig1		GO:0003735	Prosite:PS00712|Prosite:PDOC00590	IEA		P	Ribosomal protein S17e signature		transcript	taxon:13686	20060427	Prosite
Prosite	SI.CL.18.cl.1800.Contig1	SI.CL.18.cl.1800.Contig1		GO:0006412	Prosite:PS00712|Prosite:PDOC00590	IEA		P	Ribosomal protein S17e signature		transcript	taxon:13686	20060427	Prosite
Prosite	SI.CL.18.cl.1800.Contig1	SI.CL.18.cl.1800.Contig1		GO:0005622	Prosite:PS00712|Prosite:PDOC00590	IEA		P	Ribosomal protein S17e signature		transcript	taxon:13686	20060427	Prosite
Prosite	SI.CL.18.cl.1800.Contig1	SI.CL.18.cl.1800.Contig1		GO:0005840	Prosite:PS00712|Prosite:PDOC00590	IEA		P	Ribosomal protein S17e signature		transcript	taxon:13686	20060427	Prosite
Prosite	SI.CL.18.cl.1800.Contig2	SI.CL.18.cl.1800.Contig2		GO:0003735	Prosite:PS00712|Prosite:PDOC00590	IEA		P	Ribosomal protein S17e signature		transcript	taxon:13686	20060427	Prosite
Prosite	SI.CL.18.cl.1800.Contig2	SI.CL.18.cl.1800.Contig2		GO:0006412	Prosite:PS00712|Prosite:PDOC00590	IEA		P	Ribosomal protein S17e signature		transcript	taxon:13686	20060427	Prosite
Prosite	SI.CL.18.cl.1800.Contig2	SI.CL.18.cl.1800.Contig2		GO:0005622	Prosite:PS00712|Prosite:PDOC00590	IEA		P	Ribosomal protein S17e signature		transcript	taxon:13686	20060427	Prosite
Prosite	SI.CL.18.cl.1800.Contig2	SI.CL.18.cl.1800.Contig2		GO:0005840	Prosite:PS00712|Prosite:PDOC00590	IEA		P	Ribosomal protein S17e signature		transcript	taxon:13686	20060427	Prosite
Prosite	SI.CL.18.cl.1802.Contig1	SI.CL.18.cl.1802.Contig1		GO:0003735	Prosite:PS01257|Prosite:PDOC00968	IEA		P	Ribosomal protein L10e signature		transcript	taxon:13686	20060427	Prosite
Prosite	SI.CL.18.cl.1802.Contig1	SI.CL.18.cl.1802.Contig1		GO:0006412	Prosite:PS01257|Prosite:PDOC00968	IEA		P	Ribosomal protein L10e signature		transcript	taxon:13686	20060427	Prosite
Prosite	SI.CL.18.cl.1802.Contig1	SI.CL.18.cl.1802.Contig1		GO:0005622	Prosite:PS01257|Prosite:PDOC00968	IEA		P	Ribosomal protein L10e signature		transcript	taxon:13686	20060427	Prosite
Prosite	SI.CL.18.cl.1802.Contig1	SI.CL.18.cl.1802.Contig1		GO:0005840	Prosite:PS01257|Prosite:PDOC00968	IEA		P	Ribosomal protein L10e signature		transcript	taxon:13686	20060427	Prosite
Prosite	SI.CL.18.cl.1803.Contig1	SI.CL.18.cl.1803.Contig1		GO:0004175	Prosite:PS00854|Prosite:PDOC00668	IEA		P	Proteasome B-type subunits signature		transcript	taxon:13686	20060427	Prosite
Prosite	SI.CL.18.cl.1803.Contig1	SI.CL.18.cl.1803.Contig1		GO:0006511	Prosite:PS00854|Prosite:PDOC00668	IEA		P	Proteasome B-type subunits signature		transcript	taxon:13686	20060427	Prosite
Prosite	SI.CL.18.cl.1803.Contig1	SI.CL.18.cl.1803.Contig1		GO:0005839	Prosite:PS00854|Prosite:PDOC00668	IEA		P	Proteasome B-type subunits signature		transcript	taxon:13686	20060427	Prosite
Prosite	SI.CL.18.cl.1808.Contig1	SI.CL.18.cl.1808.Contig1		GO:0004252	Prosite:PS00135|Prosite:PDOC00124	IEA		P	Serine proteases, trypsin family, serine active site		transcript	taxon:13686	20060427	Prosite
Prosite	SI.CL.18.cl.1808.Contig1	SI.CL.18.cl.1808.Contig1		GO:0006508	Prosite:PS00135|Prosite:PDOC00124	IEA		P	Serine proteases, trypsin family, serine active site		transcript	taxon:13686	20060427	Prosite
Prosite	SI.CL.18.cl.1809.Contig1	SI.CL.18.cl.1809.Contig1		GO:0005509	Prosite:PS00018|Prosite:PDOC00018	IEA		P	EF-hand calcium-binding domain		transcript	taxon:13686	20060427	Prosite
Prosite	SI.CL.18.cl.1812.Contig1	SI.CL.18.cl.1812.Contig1		GO:0003677	Prosite:PS00959|Prosite:PDOC00287	IEA		P	Histone H3 signature 2		transcript	taxon:13686	20060427	Prosite
Prosite	SI.CL.18.cl.1812.Contig1	SI.CL.18.cl.1812.Contig1		GO:0006334	Prosite:PS00959|Prosite:PDOC00287	IEA		P	Histone H3 signature 2		transcript	taxon:13686	20060427	Prosite
Prosite	SI.CL.18.cl.1812.Contig1	SI.CL.18.cl.1812.Contig1		GO:0007001	Prosite:PS00959|Prosite:PDOC00287	IEA		P	Histone H3 signature 2		transcript	taxon:13686	20060427	Prosite
Prosite	SI.CL.18.cl.1812.Contig1	SI.CL.18.cl.1812.Contig1		GO:0000786	Prosite:PS00959|Prosite:PDOC00287	IEA		P	Histone H3 signature 2		transcript	taxon:13686	20060427	Prosite
Prosite	SI.CL.18.cl.1812.Contig1	SI.CL.18.cl.1812.Contig1		GO:0005634	Prosite:PS00959|Prosite:PDOC00287	IEA		P	Histone H3 signature 2		transcript	taxon:13686	20060427	Prosite
Prosite	SI.CL.18.cl.1816.Contig1	SI.CL.18.cl.1816.Contig1		GO:0004722	Prosite:PS01032|Prosite:PDOC00792	IEA		P	Protein phosphatase 2C signature		transcript	taxon:13686	20060427	Prosite
Prosite	SI.CL.18.cl.1816.Contig1	SI.CL.18.cl.1816.Contig1		GO:0006470	Prosite:PS01032|Prosite:PDOC00792	IEA		P	Protein phosphatase 2C signature		transcript	taxon:13686	20060427	Prosite
Prosite	SI.CL.18.cl.1816.Contig1	SI.CL.18.cl.1816.Contig1		GO:0008287	Prosite:PS01032|Prosite:PDOC00792	IEA		P	Protein phosphatase 2C signature		transcript	taxon:13686	20060427	Prosite
Prosite	SI.CL.18.cl.1828.Contig1	SI.CL.18.cl.1828.Contig1		GO:0003735	Prosite:PS00362|Prosite:PDOC00313	IEA		P	Ribosomal protein S15 signature		transcript	taxon:13686	20060427	Prosite
Prosite	SI.CL.18.cl.1828.Contig1	SI.CL.18.cl.1828.Contig1		GO:0006412	Prosite:PS00362|Prosite:PDOC00313	IEA		P	Ribosomal protein S15 signature		transcript	taxon:13686	20060427	Prosite
Prosite	SI.CL.18.cl.1828.Contig1	SI.CL.18.cl.1828.Contig1		GO:0005622	Prosite:PS00362|Prosite:PDOC00313	IEA		P	Ribosomal protein S15 signature		transcript	taxon:13686	20060427	Prosite
Prosite	SI.CL.18.cl.1828.Contig1	SI.CL.18.cl.1828.Contig1		GO:0005840	Prosite:PS00362|Prosite:PDOC00313	IEA		P	Ribosomal protein S15 signature		transcript	taxon:13686	20060427	Prosite
Prosite	SI.CL.18.cl.1865.Contig1	SI.CL.18.cl.1865.Contig1		GO:0004175	Prosite:PS00388|Prosite:PDOC00326	IEA		P	Proteasome A-type subunits signature		transcript	taxon:13686	20060427	Prosite
Prosite	SI.CL.18.cl.1865.Contig1	SI.CL.18.cl.1865.Contig1		GO:0006511	Prosite:PS00388|Prosite:PDOC00326	IEA		P	Proteasome A-type subunits signature		transcript	taxon:13686	20060427	Prosite
Prosite	SI.CL.18.cl.1865.Contig1	SI.CL.18.cl.1865.Contig1		GO:0005839	Prosite:PS00388|Prosite:PDOC00326	IEA		P	Proteasome A-type subunits signature		transcript	taxon:13686	20060427	Prosite
Prosite	SI.CL.18.cl.1868.Contig1	SI.CL.18.cl.1868.Contig1		GO:0004222	Prosite:PS00143|Prosite:PDOC00130	IEA		P	Insulinase family, zinc-binding region signature		transcript	taxon:13686	20060427	Prosite
Prosite	SI.CL.18.cl.1868.Contig1	SI.CL.18.cl.1868.Contig1		GO:0006508	Prosite:PS00143|Prosite:PDOC00130	IEA		P	Insulinase family, zinc-binding region signature		transcript	taxon:13686	20060427	Prosite
Prosite	SI.CL.18.cl.1872.Contig1	SI.CL.18.cl.1872.Contig1		GO:0005509	Prosite:PS00018|Prosite:PDOC00018	IEA		P	EF-hand calcium-binding domain		transcript	taxon:13686	20060427	Prosite
Prosite	SI.CL.18.cl.1875.Contig1	SI.CL.18.cl.1875.Contig1		GO:0004497	Prosite:PS00086|Prosite:PDOC00081	IEA		P	Cytochrome P450 cysteine heme-iron ligand signature		transcript	taxon:13686	20060427	Prosite
Prosite	SI.CL.18.cl.1875.Contig1	SI.CL.18.cl.1875.Contig1		GO:0005506	Prosite:PS00086|Prosite:PDOC00081	IEA		P	Cytochrome P450 cysteine heme-iron ligand signature		transcript	taxon:13686	20060427	Prosite
Prosite	SI.CL.18.cl.1875.Contig1	SI.CL.18.cl.1875.Contig1		GO:0020037	Prosite:PS00086|Prosite:PDOC00081	IEA		P	Cytochrome P450 cysteine heme-iron ligand signature		transcript	taxon:13686	20060427	Prosite
Prosite	SI.CL.18.cl.1875.Contig1	SI.CL.18.cl.1875.Contig1		GO:0006118	Prosite:PS00086|Prosite:PDOC00081	IEA		P	Cytochrome P450 cysteine heme-iron ligand signature		transcript	taxon:13686	20060427	Prosite
Prosite	SI.CL.18.cl.1885.Contig1	SI.CL.18.cl.1885.Contig1		GO:0005529	Prosite:PS00615|Prosite:PDOC00537	IEA		P	C-type lectin domain signature		transcript	taxon:13686	20060427	Prosite
Prosite	SI.CL.18.cl.1891.Contig1	SI.CL.18.cl.1891.Contig1		GO:0004372	Prosite:PS00096|Prosite:PDOC00090	IEA		P	Serine hydroxymethyltransferase pyridoxal-phosphate attachment site		transcript	taxon:13686	20060427	Prosite
Prosite	SI.CL.18.cl.1891.Contig1	SI.CL.18.cl.1891.Contig1		GO:0006544	Prosite:PS00096|Prosite:PDOC00090	IEA		P	Serine hydroxymethyltransferase pyridoxal-phosphate attachment site		transcript	taxon:13686	20060427	Prosite
Prosite	SI.CL.18.cl.1891.Contig1	SI.CL.18.cl.1891.Contig1		GO:0006563	Prosite:PS00096|Prosite:PDOC00090	IEA		P	Serine hydroxymethyltransferase pyridoxal-phosphate attachment site		transcript	taxon:13686	20060427	Prosite
Prosite	SI.CL.19.cl.1901.Contig1	SI.CL.19.cl.1901.Contig1		GO:0003723	Prosite:PS00300|Prosite:PDOC00272	IEA		P	SRP54-type proteins GTP-binding domain signature		transcript	taxon:13686	20060427	Prosite
Prosite	SI.CL.19.cl.1901.Contig1	SI.CL.19.cl.1901.Contig1		GO:0005525	Prosite:PS00300|Prosite:PDOC00272	IEA		P	SRP54-type proteins GTP-binding domain signature		transcript	taxon:13686	20060427	Prosite
Prosite	SI.CL.19.cl.1901.Contig1	SI.CL.19.cl.1901.Contig1		GO:0006614	Prosite:PS00300|Prosite:PDOC00272	IEA		P	SRP54-type proteins GTP-binding domain signature		transcript	taxon:13686	20060427	Prosite
Prosite	SI.CL.19.cl.1901.Contig1	SI.CL.19.cl.1901.Contig1		GO:0005786	Prosite:PS00300|Prosite:PDOC00272	IEA		P	SRP54-type proteins GTP-binding domain signature		transcript	taxon:13686	20060427	Prosite
Prosite	SI.CL.19.cl.1903.Contig1	SI.CL.19.cl.1903.Contig1		GO:0003735	Prosite:PS01171|Prosite:PDOC00901	IEA		P	Ribosomal protein L21e signature		transcript	taxon:13686	20060427	Prosite
Prosite	SI.CL.19.cl.1903.Contig1	SI.CL.19.cl.1903.Contig1		GO:0006412	Prosite:PS01171|Prosite:PDOC00901	IEA		P	Ribosomal protein L21e signature		transcript	taxon:13686	20060427	Prosite
Prosite	SI.CL.19.cl.1903.Contig1	SI.CL.19.cl.1903.Contig1		GO:0005622	Prosite:PS01171|Prosite:PDOC00901	IEA		P	Ribosomal protein L21e signature		transcript	taxon:13686	20060427	Prosite
Prosite	SI.CL.19.cl.1903.Contig1	SI.CL.19.cl.1903.Contig1		GO:0005840	Prosite:PS01171|Prosite:PDOC00901	IEA		P	Ribosomal protein L21e signature		transcript	taxon:13686	20060427	Prosite
Prosite	SI.CL.19.cl.1910.Contig1	SI.CL.19.cl.1910.Contig1		GO:0003735	Prosite:PS00709|Prosite:PDOC00588	IEA		P	Ribosomal protein L30e signature 1		transcript	taxon:13686	20060427	Prosite
Prosite	SI.CL.19.cl.1910.Contig1	SI.CL.19.cl.1910.Contig1		GO:0006412	Prosite:PS00709|Prosite:PDOC00588	IEA		P	Ribosomal protein L30e signature 1		transcript	taxon:13686	20060427	Prosite
Prosite	SI.CL.19.cl.1910.Contig1	SI.CL.19.cl.1910.Contig1		GO:0005622	Prosite:PS00709|Prosite:PDOC00588	IEA		P	Ribosomal protein L30e signature 1		transcript	taxon:13686	20060427	Prosite
Prosite	SI.CL.19.cl.1910.Contig1	SI.CL.19.cl.1910.Contig1		GO:0005840	Prosite:PS00709|Prosite:PDOC00588	IEA		P	Ribosomal protein L30e signature 1		transcript	taxon:13686	20060427	Prosite
Prosite	SI.CL.19.cl.1910.Contig1	SI.CL.19.cl.1910.Contig1		GO:0003735	Prosite:PS00993|Prosite:PDOC00588	IEA		P	Ribosomal protein L30e signature 2		transcript	taxon:13686	20060427	Prosite
Prosite	SI.CL.19.cl.1910.Contig1	SI.CL.19.cl.1910.Contig1		GO:0006412	Prosite:PS00993|Prosite:PDOC00588	IEA		P	Ribosomal protein L30e signature 2		transcript	taxon:13686	20060427	Prosite
Prosite	SI.CL.19.cl.1910.Contig1	SI.CL.19.cl.1910.Contig1		GO:0005622	Prosite:PS00993|Prosite:PDOC00588	IEA		P	Ribosomal protein L30e signature 2		transcript	taxon:13686	20060427	Prosite
Prosite	SI.CL.19.cl.1910.Contig1	SI.CL.19.cl.1910.Contig1		GO:0005840	Prosite:PS00993|Prosite:PDOC00588	IEA		P	Ribosomal protein L30e signature 2		transcript	taxon:13686	20060427	Prosite
Prosite	SI.CL.19.cl.1941.Contig1	SI.CL.19.cl.1941.Contig1		GO:0005622	Prosite:PS01193|Prosite:PDOC00918	IEA		P	Ribosomal protein S8e signature		transcript	taxon:13686	20060427	Prosite
Prosite	SI.CL.19.cl.1975.Contig1	SI.CL.19.cl.1975.Contig1		GO:0003735	Prosite:PS00632|Prosite:PDOC00549	IEA		P	Ribosomal protein S4 signature		transcript	taxon:13686	20060427	Prosite
Prosite	SI.CL.19.cl.1975.Contig1	SI.CL.19.cl.1975.Contig1		GO:0006412	Prosite:PS00632|Prosite:PDOC00549	IEA		P	Ribosomal protein S4 signature		transcript	taxon:13686	20060427	Prosite
Prosite	SI.CL.19.cl.1975.Contig1	SI.CL.19.cl.1975.Contig1		GO:0005622	Prosite:PS00632|Prosite:PDOC00549	IEA		P	Ribosomal protein S4 signature		transcript	taxon:13686	20060427	Prosite
Prosite	SI.CL.19.cl.1975.Contig1	SI.CL.19.cl.1975.Contig1		GO:0005840	Prosite:PS00632|Prosite:PDOC00549	IEA		P	Ribosomal protein S4 signature		transcript	taxon:13686	20060427	Prosite
Prosite	SI.CL.20.cl.2004.Contig1	SI.CL.20.cl.2004.Contig1		GO:0004252	Prosite:PS00134|Prosite:PDOC00124	IEA		P	Serine proteases, trypsin family, histidine active site		transcript	taxon:13686	20060427	Prosite
Prosite	SI.CL.20.cl.2004.Contig1	SI.CL.20.cl.2004.Contig1		GO:0006508	Prosite:PS00134|Prosite:PDOC00124	IEA		P	Serine proteases, trypsin family, histidine active site		transcript	taxon:13686	20060427	Prosite
Prosite	SI.CL.20.cl.2004.Contig1	SI.CL.20.cl.2004.Contig1		GO:0004252	Prosite:PS00135|Prosite:PDOC00124	IEA		P	Serine proteases, trypsin family, serine active site		transcript	taxon:13686	20060427	Prosite
Prosite	SI.CL.20.cl.2004.Contig1	SI.CL.20.cl.2004.Contig1		GO:0006508	Prosite:PS00135|Prosite:PDOC00124	IEA		P	Serine proteases, trypsin family, serine active site		transcript	taxon:13686	20060427	Prosite
Prosite	SI.CL.20.cl.2028.Contig1	SI.CL.20.cl.2028.Contig1		GO:0005524	Prosite:PS00681|Prosite:PDOC00576	IEA		P	Chaperonins cpn10 signature		transcript	taxon:13686	20060427	Prosite
Prosite	SI.CL.20.cl.2028.Contig1	SI.CL.20.cl.2028.Contig1		GO:0006457	Prosite:PS00681|Prosite:PDOC00576	IEA		P	Chaperonins cpn10 signature		transcript	taxon:13686	20060427	Prosite
Prosite	SI.CL.20.cl.2046.Contig1	SI.CL.20.cl.2046.Contig1		GO:0004379	Prosite:PS00975|Prosite:PDOC00752	IEA		P	Myristoyl-CoA:protein N-myristoyltransferase signature 1		transcript	taxon:13686	20060427	Prosite
Prosite	SI.CL.20.cl.2046.Contig1	SI.CL.20.cl.2046.Contig1		GO:0006499	Prosite:PS00975|Prosite:PDOC00752	IEA		P	Myristoyl-CoA:protein N-myristoyltransferase signature 1		transcript	taxon:13686	20060427	Prosite
Prosite	SI.CL.20.cl.2053.Contig1	SI.CL.20.cl.2053.Contig1		GO:0003735	Prosite:PS00467|Prosite:PDOC00384	IEA		P	Ribosomal protein L2 signature		transcript	taxon:13686	20060427	Prosite
Prosite	SI.CL.20.cl.2053.Contig1	SI.CL.20.cl.2053.Contig1		GO:0006412	Prosite:PS00467|Prosite:PDOC00384	IEA		P	Ribosomal protein L2 signature		transcript	taxon:13686	20060427	Prosite
Prosite	SI.CL.20.cl.2053.Contig1	SI.CL.20.cl.2053.Contig1		GO:0005622	Prosite:PS00467|Prosite:PDOC00384	IEA		P	Ribosomal protein L2 signature		transcript	taxon:13686	20060427	Prosite
Prosite	SI.CL.20.cl.2053.Contig1	SI.CL.20.cl.2053.Contig1		GO:0005840	Prosite:PS00467|Prosite:PDOC00384	IEA		P	Ribosomal protein L2 signature		transcript	taxon:13686	20060427	Prosite
Prosite	SI.CL.20.cl.2066.Contig1	SI.CL.20.cl.2066.Contig1		GO:0003676	Prosite:PS00028|Prosite:PDOC00028	IEA		P	Zinc finger C2H2 type domain signature		transcript	taxon:13686	20060427	Prosite
Prosite	SI.CL.20.cl.2066.Contig1	SI.CL.20.cl.2066.Contig1		GO:0008270	Prosite:PS00028|Prosite:PDOC00028	IEA		P	Zinc finger C2H2 type domain signature		transcript	taxon:13686	20060427	Prosite
Prosite	SI.CL.20.cl.2066.Contig1	SI.CL.20.cl.2066.Contig1		GO:0005634	Prosite:PS00028|Prosite:PDOC00028	IEA		P	Zinc finger C2H2 type domain signature		transcript	taxon:13686	20060427	Prosite
Prosite	SI.CL.21.cl.2105.Contig1	SI.CL.21.cl.2105.Contig1		GO:0005509	Prosite:PS00018|Prosite:PDOC00018	IEA		P	EF-hand calcium-binding domain		transcript	taxon:13686	20060427	Prosite
Prosite	SI.CL.21.cl.2128.Contig1	SI.CL.21.cl.2128.Contig1		GO:0016491	Prosite:PS00070|Prosite:PDOC00068	IEA		P	Aldehyde dehydrogenases cysteine active site		transcript	taxon:13686	20060427	Prosite
Prosite	SI.CL.21.cl.2128.Contig1	SI.CL.21.cl.2128.Contig1		GO:0008152	Prosite:PS00070|Prosite:PDOC00068	IEA		P	Aldehyde dehydrogenases cysteine active site		transcript	taxon:13686	20060427	Prosite
Prosite	SI.CL.21.cl.2142.Contig1	SI.CL.21.cl.2142.Contig1		GO:0004252	Prosite:PS00134|Prosite:PDOC00124	IEA		P	Serine proteases, trypsin family, histidine active site		transcript	taxon:13686	20060427	Prosite
Prosite	SI.CL.21.cl.2142.Contig1	SI.CL.21.cl.2142.Contig1		GO:0006508	Prosite:PS00134|Prosite:PDOC00124	IEA		P	Serine proteases, trypsin family, histidine active site		transcript	taxon:13686	20060427	Prosite
Prosite	SI.CL.21.cl.2142.Contig1	SI.CL.21.cl.2142.Contig1		GO:0004252	Prosite:PS00135|Prosite:PDOC00124	IEA		P	Serine proteases, trypsin family, serine active site		transcript	taxon:13686	20060427	Prosite
Prosite	SI.CL.21.cl.2142.Contig1	SI.CL.21.cl.2142.Contig1		GO:0006508	Prosite:PS00135|Prosite:PDOC00124	IEA		P	Serine proteases, trypsin family, serine active site		transcript	taxon:13686	20060427	Prosite
Prosite	SI.CL.21.cl.2181.Contig1	SI.CL.21.cl.2181.Contig1		GO:0004785	Prosite:PS00087|Prosite:PDOC00082	IEA		P	Copper/Zinc superoxide dismutase signature 1		transcript	taxon:13686	20060427	Prosite
Prosite	SI.CL.21.cl.2181.Contig1	SI.CL.21.cl.2181.Contig1		GO:0046872	Prosite:PS00087|Prosite:PDOC00082	IEA		P	Copper/Zinc superoxide dismutase signature 1		transcript	taxon:13686	20060427	Prosite
Prosite	SI.CL.21.cl.2181.Contig1	SI.CL.21.cl.2181.Contig1		GO:0006801	Prosite:PS00087|Prosite:PDOC00082	IEA		P	Copper/Zinc superoxide dismutase signature 1		transcript	taxon:13686	20060427	Prosite
Prosite	SI.CL.22.cl.2272.Contig1	SI.CL.22.cl.2272.Contig1		GO:0003735	Prosite:PS00783|Prosite:PDOC00625	IEA		P	Ribosomal protein L13 signature		transcript	taxon:13686	20060427	Prosite
Prosite	SI.CL.22.cl.2272.Contig1	SI.CL.22.cl.2272.Contig1		GO:0006412	Prosite:PS00783|Prosite:PDOC00625	IEA		P	Ribosomal protein L13 signature		transcript	taxon:13686	20060427	Prosite
Prosite	SI.CL.22.cl.2272.Contig1	SI.CL.22.cl.2272.Contig1		GO:0005622	Prosite:PS00783|Prosite:PDOC00625	IEA		P	Ribosomal protein L13 signature		transcript	taxon:13686	20060427	Prosite
Prosite	SI.CL.22.cl.2272.Contig1	SI.CL.22.cl.2272.Contig1		GO:0005840	Prosite:PS00783|Prosite:PDOC00625	IEA		P	Ribosomal protein L13 signature		transcript	taxon:13686	20060427	Prosite
Prosite	SI.CL.22.cl.2288.Contig1	SI.CL.22.cl.2288.Contig1		GO:0016491	Prosite:PS00798|Prosite:PDOC00061	IEA		P	Aldo/keto reductase family signature 1		transcript	taxon:13686	20060427	Prosite
Prosite	SI.CL.22.cl.2299.Contig1	SI.CL.22.cl.2299.Contig1		GO:0006886	Prosite:PS00989|Prosite:PDOC00760	IEA		P	Clathrin adaptor complexes small chain signature		transcript	taxon:13686	20060427	Prosite
Prosite	SI.CL.22.cl.2299.Contig1	SI.CL.22.cl.2299.Contig1		GO:0030125	Prosite:PS00989|Prosite:PDOC00760	IEA		P	Clathrin adaptor complexes small chain signature		transcript	taxon:13686	20060427	Prosite
Prosite	SI.CL.23.cl.2342.Contig1	SI.CL.23.cl.2342.Contig1		GO:0003735	Prosite:PS00585|Prosite:PDOC00505	IEA		P	Ribosomal protein S5 signature		transcript	taxon:13686	20060427	Prosite
Prosite	SI.CL.23.cl.2342.Contig1	SI.CL.23.cl.2342.Contig1		GO:0006412	Prosite:PS00585|Prosite:PDOC00505	IEA		P	Ribosomal protein S5 signature		transcript	taxon:13686	20060427	Prosite
Prosite	SI.CL.23.cl.2342.Contig1	SI.CL.23.cl.2342.Contig1		GO:0005622	Prosite:PS00585|Prosite:PDOC00505	IEA		P	Ribosomal protein S5 signature		transcript	taxon:13686	20060427	Prosite
Prosite	SI.CL.23.cl.2342.Contig1	SI.CL.23.cl.2342.Contig1		GO:0005840	Prosite:PS00585|Prosite:PDOC00505	IEA		P	Ribosomal protein S5 signature		transcript	taxon:13686	20060427	Prosite
Prosite	SI.CL.23.cl.2359.Contig1	SI.CL.23.cl.2359.Contig1		GO:0003676	Prosite:PS00028|Prosite:PDOC00028	IEA		P	Zinc finger C2H2 type domain signature		transcript	taxon:13686	20060427	Prosite
Prosite	SI.CL.23.cl.2359.Contig1	SI.CL.23.cl.2359.Contig1		GO:0008270	Prosite:PS00028|Prosite:PDOC00028	IEA		P	Zinc finger C2H2 type domain signature		transcript	taxon:13686	20060427	Prosite
Prosite	SI.CL.23.cl.2359.Contig1	SI.CL.23.cl.2359.Contig1		GO:0005634	Prosite:PS00028|Prosite:PDOC00028	IEA		P	Zinc finger C2H2 type domain signature		transcript	taxon:13686	20060427	Prosite
Prosite	SI.CL.23.cl.2360.Contig1	SI.CL.23.cl.2360.Contig1		GO:0008121	Prosite:PS00199|Prosite:PDOC00177	IEA		P	Rieske iron-sulfur protein signature 1		transcript	taxon:13686	20060427	Prosite
Prosite	SI.CL.23.cl.2360.Contig1	SI.CL.23.cl.2360.Contig1		GO:0006118	Prosite:PS00199|Prosite:PDOC00177	IEA		P	Rieske iron-sulfur protein signature 1		transcript	taxon:13686	20060427	Prosite
Prosite	SI.CL.23.cl.2360.Contig1	SI.CL.23.cl.2360.Contig1		GO:0016020	Prosite:PS00199|Prosite:PDOC00177	IEA		P	Rieske iron-sulfur protein signature 1		transcript	taxon:13686	20060427	Prosite
Prosite	SI.CL.23.cl.2360.Contig1	SI.CL.23.cl.2360.Contig1		GO:0045285	Prosite:PS00199|Prosite:PDOC00177	IEA		P	Rieske iron-sulfur protein signature 1		transcript	taxon:13686	20060427	Prosite
Prosite	SI.CL.23.cl.2360.Contig1	SI.CL.23.cl.2360.Contig1		GO:0008121	Prosite:PS00200|Prosite:PDOC00177	IEA		P	Rieske iron-sulfur protein signature 2		transcript	taxon:13686	20060427	Prosite
Prosite	SI.CL.23.cl.2360.Contig1	SI.CL.23.cl.2360.Contig1		GO:0006118	Prosite:PS00200|Prosite:PDOC00177	IEA		P	Rieske iron-sulfur protein signature 2		transcript	taxon:13686	20060427	Prosite
Prosite	SI.CL.23.cl.2360.Contig1	SI.CL.23.cl.2360.Contig1		GO:0016020	Prosite:PS00200|Prosite:PDOC00177	IEA		P	Rieske iron-sulfur protein signature 2		transcript	taxon:13686	20060427	Prosite
Prosite	SI.CL.23.cl.2360.Contig1	SI.CL.23.cl.2360.Contig1		GO:0045285	Prosite:PS00200|Prosite:PDOC00177	IEA		P	Rieske iron-sulfur protein signature 2		transcript	taxon:13686	20060427	Prosite
Prosite	SI.CL.24.cl.2429.Contig1	SI.CL.24.cl.2429.Contig1		GO:0004175	Prosite:PS00388|Prosite:PDOC00326	IEA		P	Proteasome A-type subunits signature		transcript	taxon:13686	20060427	Prosite
Prosite	SI.CL.24.cl.2429.Contig1	SI.CL.24.cl.2429.Contig1		GO:0006511	Prosite:PS00388|Prosite:PDOC00326	IEA		P	Proteasome A-type subunits signature		transcript	taxon:13686	20060427	Prosite
Prosite	SI.CL.24.cl.2429.Contig1	SI.CL.24.cl.2429.Contig1		GO:0005839	Prosite:PS00388|Prosite:PDOC00326	IEA		P	Proteasome A-type subunits signature		transcript	taxon:13686	20060427	Prosite
Prosite	SI.CL.24.cl.2489.Contig1	SI.CL.24.cl.2489.Contig1		GO:0003676	Prosite:PS00028|Prosite:PDOC00028	IEA		P	Zinc finger C2H2 type domain signature		transcript	taxon:13686	20060427	Prosite
Prosite	SI.CL.24.cl.2489.Contig1	SI.CL.24.cl.2489.Contig1		GO:0008270	Prosite:PS00028|Prosite:PDOC00028	IEA		P	Zinc finger C2H2 type domain signature		transcript	taxon:13686	20060427	Prosite
Prosite	SI.CL.24.cl.2489.Contig1	SI.CL.24.cl.2489.Contig1		GO:0005634	Prosite:PS00028|Prosite:PDOC00028	IEA		P	Zinc finger C2H2 type domain signature		transcript	taxon:13686	20060427	Prosite
Prosite	SI.CL.25.cl.2520.Contig1	SI.CL.25.cl.2520.Contig1		GO:0004252	Prosite:PS00134|Prosite:PDOC00124	IEA		P	Serine proteases, trypsin family, histidine active site		transcript	taxon:13686	20060427	Prosite
Prosite	SI.CL.25.cl.2520.Contig1	SI.CL.25.cl.2520.Contig1		GO:0006508	Prosite:PS00134|Prosite:PDOC00124	IEA		P	Serine proteases, trypsin family, histidine active site		transcript	taxon:13686	20060427	Prosite
Prosite	SI.CL.25.cl.2520.Contig1	SI.CL.25.cl.2520.Contig1		GO:0004252	Prosite:PS00135|Prosite:PDOC00124	IEA		P	Serine proteases, trypsin family, serine active site		transcript	taxon:13686	20060427	Prosite
Prosite	SI.CL.25.cl.2520.Contig1	SI.CL.25.cl.2520.Contig1		GO:0006508	Prosite:PS00135|Prosite:PDOC00124	IEA		P	Serine proteases, trypsin family, serine active site		transcript	taxon:13686	20060427	Prosite
Prosite	SI.CL.25.cl.2527.Contig1	SI.CL.25.cl.2527.Contig1		GO:0030693	Prosite:PS01121|Prosite:PDOC00864	IEA		P	Caspase family histidine active site		transcript	taxon:13686	20060427	Prosite
Prosite	SI.CL.25.cl.2527.Contig1	SI.CL.25.cl.2527.Contig1		GO:0006508	Prosite:PS01121|Prosite:PDOC00864	IEA		P	Caspase family histidine active site		transcript	taxon:13686	20060427	Prosite
Prosite	SI.CL.25.cl.2527.Contig1	SI.CL.25.cl.2527.Contig1		GO:0030693	Prosite:PS01122|Prosite:PDOC00864	IEA		P	Caspase family cysteine active site		transcript	taxon:13686	20060427	Prosite
Prosite	SI.CL.25.cl.2527.Contig1	SI.CL.25.cl.2527.Contig1		GO:0006508	Prosite:PS01122|Prosite:PDOC00864	IEA		P	Caspase family cysteine active site		transcript	taxon:13686	20060427	Prosite
Prosite	SI.CL.25.cl.2530.Contig1	SI.CL.25.cl.2530.Contig1		GO:0004866	Prosite:PS00283|Prosite:PDOC00255	IEA		P	Soybean trypsin inhibitor (Kunitz) protease inhibitors family signature		transcript	taxon:13686	20060427	Prosite
Prosite	SI.CL.25.cl.2536.Contig1	SI.CL.25.cl.2536.Contig1		GO:0005509	Prosite:PS00018|Prosite:PDOC00018	IEA		P	EF-hand calcium-binding domain		transcript	taxon:13686	20060427	Prosite
Prosite	SI.CL.25.cl.2545.Contig1	SI.CL.25.cl.2545.Contig1		GO:0003824	Prosite:PS00147|Prosite:PDOC00135	IEA		P	Arginase family signature 1		transcript	taxon:13686	20060427	Prosite
Prosite	SI.CL.25.cl.2560.Contig1	SI.CL.25.cl.2560.Contig1		GO:0004182	Prosite:PS00132|Prosite:PDOC00123	IEA		P	Zinc carboxypeptidases, zinc-binding region 1 signature		transcript	taxon:13686	20060427	Prosite
Prosite	SI.CL.25.cl.2560.Contig1	SI.CL.25.cl.2560.Contig1		GO:0006508	Prosite:PS00132|Prosite:PDOC00123	IEA		P	Zinc carboxypeptidases, zinc-binding region 1 signature		transcript	taxon:13686	20060427	Prosite
Prosite	SI.CL.25.cl.2569.Contig1	SI.CL.25.cl.2569.Contig1		GO:0003677	Prosite:PS00115|Prosite:PDOC00106	IEA		P	Eukaryotic RNA polymerase II heptapeptide repeat		transcript	taxon:13686	20060427	Prosite
Prosite	SI.CL.25.cl.2569.Contig1	SI.CL.25.cl.2569.Contig1		GO:0006366	Prosite:PS00115|Prosite:PDOC00106	IEA		P	Eukaryotic RNA polymerase II heptapeptide repeat		transcript	taxon:13686	20060427	Prosite
Prosite	SI.CL.25.cl.2569.Contig1	SI.CL.25.cl.2569.Contig1		GO:0005665	Prosite:PS00115|Prosite:PDOC00106	IEA		P	Eukaryotic RNA polymerase II heptapeptide repeat		transcript	taxon:13686	20060427	Prosite
Prosite	SI.CL.25.cl.2575.Contig1	SI.CL.25.cl.2575.Contig1		GO:0003735	Prosite:PS00733|Prosite:PDOC00601	IEA		P	Ribosomal protein S26e signature		transcript	taxon:13686	20060427	Prosite
Prosite	SI.CL.25.cl.2575.Contig1	SI.CL.25.cl.2575.Contig1		GO:0006412	Prosite:PS00733|Prosite:PDOC00601	IEA		P	Ribosomal protein S26e signature		transcript	taxon:13686	20060427	Prosite
Prosite	SI.CL.25.cl.2575.Contig1	SI.CL.25.cl.2575.Contig1		GO:0005622	Prosite:PS00733|Prosite:PDOC00601	IEA		P	Ribosomal protein S26e signature		transcript	taxon:13686	20060427	Prosite
Prosite	SI.CL.25.cl.2575.Contig1	SI.CL.25.cl.2575.Contig1		GO:0005840	Prosite:PS00733|Prosite:PDOC00601	IEA		P	Ribosomal protein S26e signature		transcript	taxon:13686	20060427	Prosite
Prosite	SI.CL.25.cl.2594.Contig1	SI.CL.25.cl.2594.Contig1		GO:0004342	Prosite:PS01161|Prosite:PDOC00894	IEA		P	Glucosamine/galactosamine-6-phosphate isomerases signature		transcript	taxon:13686	20060427	Prosite
Prosite	SI.CL.25.cl.2594.Contig1	SI.CL.25.cl.2594.Contig1		GO:0006044	Prosite:PS01161|Prosite:PDOC00894	IEA		P	Glucosamine/galactosamine-6-phosphate isomerases signature		transcript	taxon:13686	20060427	Prosite
Prosite	SI.CL.26.cl.2608.Contig1	SI.CL.26.cl.2608.Contig1		GO:0016491	Prosite:PS00061|Prosite:PDOC00060	IEA		P	Short-chain dehydrogenases/reductases family signature		transcript	taxon:13686	20060427	Prosite
Prosite	SI.CL.26.cl.2608.Contig1	SI.CL.26.cl.2608.Contig1		GO:0008152	Prosite:PS00061|Prosite:PDOC00060	IEA		P	Short-chain dehydrogenases/reductases family signature		transcript	taxon:13686	20060427	Prosite
Prosite	SI.CL.26.cl.2623.Contig1	SI.CL.26.cl.2623.Contig1		GO:0006605	Prosite:PS01067|Prosite:PDOC00818	IEA		P	Protein secE/sec61-gamma signature		transcript	taxon:13686	20060427	Prosite
Prosite	SI.CL.26.cl.2623.Contig1	SI.CL.26.cl.2623.Contig1		GO:0006886	Prosite:PS01067|Prosite:PDOC00818	IEA		P	Protein secE/sec61-gamma signature		transcript	taxon:13686	20060427	Prosite
Prosite	SI.CL.26.cl.2623.Contig1	SI.CL.26.cl.2623.Contig1		GO:0016020	Prosite:PS01067|Prosite:PDOC00818	IEA		P	Protein secE/sec61-gamma signature		transcript	taxon:13686	20060427	Prosite
Prosite	SI.CL.26.cl.2638.Contig1	SI.CL.26.cl.2638.Contig1		GO:0005515	Prosite:PS01132|Prosite:PDOC00340	IEA		P	Actins and actin-related proteins signature		transcript	taxon:13686	20060427	Prosite
Prosite	SI.CL.26.cl.2642.Contig1	SI.CL.26.cl.2642.Contig1		GO:0003676	Prosite:PS00028|Prosite:PDOC00028	IEA		P	Zinc finger C2H2 type domain signature		transcript	taxon:13686	20060427	Prosite
Prosite	SI.CL.26.cl.2642.Contig1	SI.CL.26.cl.2642.Contig1		GO:0008270	Prosite:PS00028|Prosite:PDOC00028	IEA		P	Zinc finger C2H2 type domain signature		transcript	taxon:13686	20060427	Prosite
Prosite	SI.CL.26.cl.2642.Contig1	SI.CL.26.cl.2642.Contig1		GO:0005634	Prosite:PS00028|Prosite:PDOC00028	IEA		P	Zinc finger C2H2 type domain signature		transcript	taxon:13686	20060427	Prosite
Prosite	SI.CL.26.cl.2672.Contig1	SI.CL.26.cl.2672.Contig1		GO:0005524	Prosite:PS00675|Prosite:PDOC00579	IEA		P	Sigma-54 interaction domain ATP-binding region A signature		transcript	taxon:13686	20060427	Prosite
Prosite	SI.CL.26.cl.2672.Contig1	SI.CL.26.cl.2672.Contig1		GO:0008134	Prosite:PS00675|Prosite:PDOC00579	IEA		P	Sigma-54 interaction domain ATP-binding region A signature		transcript	taxon:13686	20060427	Prosite
Prosite	SI.CL.26.cl.2672.Contig1	SI.CL.26.cl.2672.Contig1		GO:0006355	Prosite:PS00675|Prosite:PDOC00579	IEA		P	Sigma-54 interaction domain ATP-binding region A signature		transcript	taxon:13686	20060427	Prosite
Prosite	SI.CL.26.cl.2672.Contig1	SI.CL.26.cl.2672.Contig1		GO:0005622	Prosite:PS00675|Prosite:PDOC00579	IEA		P	Sigma-54 interaction domain ATP-binding region A signature		transcript	taxon:13686	20060427	Prosite
Prosite	SI.CL.26.cl.2682.Contig1	SI.CL.26.cl.2682.Contig1		GO:0005509	Prosite:PS00018|Prosite:PDOC00018	IEA		P	EF-hand calcium-binding domain		transcript	taxon:13686	20060427	Prosite
Prosite	SI.CL.26.cl.2691.Contig1	SI.CL.26.cl.2691.Contig1		GO:0005509	Prosite:PS00018|Prosite:PDOC00018	IEA		P	EF-hand calcium-binding domain		transcript	taxon:13686	20060427	Prosite
Prosite	SI.CL.27.cl.2715.Contig1	SI.CL.27.cl.2715.Contig1		GO:0005509	Prosite:PS00018|Prosite:PDOC00018	IEA		P	EF-hand calcium-binding domain		transcript	taxon:13686	20060427	Prosite
Prosite	SI.CL.27.cl.2724.Contig1	SI.CL.27.cl.2724.Contig1		GO:0004252	Prosite:PS00134|Prosite:PDOC00124	IEA		P	Serine proteases, trypsin family, histidine active site		transcript	taxon:13686	20060427	Prosite
Prosite	SI.CL.27.cl.2724.Contig1	SI.CL.27.cl.2724.Contig1		GO:0006508	Prosite:PS00134|Prosite:PDOC00124	IEA		P	Serine proteases, trypsin family, histidine active site		transcript	taxon:13686	20060427	Prosite
Prosite	SI.CL.27.cl.2724.Contig1	SI.CL.27.cl.2724.Contig1		GO:0004252	Prosite:PS00135|Prosite:PDOC00124	IEA		P	Serine proteases, trypsin family, serine active site		transcript	taxon:13686	20060427	Prosite
Prosite	SI.CL.27.cl.2724.Contig1	SI.CL.27.cl.2724.Contig1		GO:0006508	Prosite:PS00135|Prosite:PDOC00124	IEA		P	Serine proteases, trypsin family, serine active site		transcript	taxon:13686	20060427	Prosite
Prosite	SI.CL.27.cl.2731.Contig1	SI.CL.27.cl.2731.Contig1		GO:0003735	Prosite:PS00948|Prosite:PDOC00730	IEA		P	Ribosomal protein S7e signature		transcript	taxon:13686	20060427	Prosite
Prosite	SI.CL.27.cl.2731.Contig1	SI.CL.27.cl.2731.Contig1		GO:0006412	Prosite:PS00948|Prosite:PDOC00730	IEA		P	Ribosomal protein S7e signature		transcript	taxon:13686	20060427	Prosite
Prosite	SI.CL.27.cl.2731.Contig1	SI.CL.27.cl.2731.Contig1		GO:0005622	Prosite:PS00948|Prosite:PDOC00730	IEA		P	Ribosomal protein S7e signature		transcript	taxon:13686	20060427	Prosite
Prosite	SI.CL.27.cl.2731.Contig1	SI.CL.27.cl.2731.Contig1		GO:0005840	Prosite:PS00948|Prosite:PDOC00730	IEA		P	Ribosomal protein S7e signature		transcript	taxon:13686	20060427	Prosite
Prosite	SI.CL.27.cl.2734.Contig1	SI.CL.27.cl.2734.Contig1		GO:0016021	Prosite:PS00421|Prosite:PDOC00371	IEA		P	Transmembrane 4 family signature		transcript	taxon:13686	20060427	Prosite
Prosite	SI.CL.27.cl.2762.Contig1	SI.CL.27.cl.2762.Contig1		GO:0003735	Prosite:PS00579|Prosite:PDOC00501	IEA		P	Ribosomal protein L29 signature		transcript	taxon:13686	20060427	Prosite
Prosite	SI.CL.27.cl.2762.Contig1	SI.CL.27.cl.2762.Contig1		GO:0006412	Prosite:PS00579|Prosite:PDOC00501	IEA		P	Ribosomal protein L29 signature		transcript	taxon:13686	20060427	Prosite
Prosite	SI.CL.27.cl.2762.Contig1	SI.CL.27.cl.2762.Contig1		GO:0005622	Prosite:PS00579|Prosite:PDOC00501	IEA		P	Ribosomal protein L29 signature		transcript	taxon:13686	20060427	Prosite
Prosite	SI.CL.27.cl.2762.Contig1	SI.CL.27.cl.2762.Contig1		GO:0005840	Prosite:PS00579|Prosite:PDOC00501	IEA		P	Ribosomal protein L29 signature		transcript	taxon:13686	20060427	Prosite
Prosite	SI.CL.27.cl.2779.Contig1	SI.CL.27.cl.2779.Contig1		GO:0004252	Prosite:PS00135|Prosite:PDOC00124	IEA		P	Serine proteases, trypsin family, serine active site		transcript	taxon:13686	20060427	Prosite
Prosite	SI.CL.27.cl.2779.Contig1	SI.CL.27.cl.2779.Contig1		GO:0006508	Prosite:PS00135|Prosite:PDOC00124	IEA		P	Serine proteases, trypsin family, serine active site		transcript	taxon:13686	20060427	Prosite
Prosite	SI.CL.28.cl.2822.Contig2	SI.CL.28.cl.2822.Contig2		GO:0005488	Prosite:PS00214|Prosite:PDOC00188	IEA		P	Cytosolic fatty-acid binding proteins signature		transcript	taxon:13686	20060427	Prosite
Prosite	SI.CL.28.cl.2822.Contig2	SI.CL.28.cl.2822.Contig2		GO:0008289	Prosite:PS00214|Prosite:PDOC00188	IEA		P	Cytosolic fatty-acid binding proteins signature		transcript	taxon:13686	20060427	Prosite
Prosite	SI.CL.28.cl.2822.Contig2	SI.CL.28.cl.2822.Contig2		GO:0006810	Prosite:PS00214|Prosite:PDOC00188	IEA		P	Cytosolic fatty-acid binding proteins signature		transcript	taxon:13686	20060427	Prosite
Prosite	SI.CL.28.cl.2869.Contig1	SI.CL.28.cl.2869.Contig1		GO:0004055	Prosite:PS00565|Prosite:PDOC00488	IEA		P	Argininosuccinate synthase signature 2		transcript	taxon:13686	20060427	Prosite
Prosite	SI.CL.28.cl.2869.Contig1	SI.CL.28.cl.2869.Contig1		GO:0005524	Prosite:PS00565|Prosite:PDOC00488	IEA		P	Argininosuccinate synthase signature 2		transcript	taxon:13686	20060427	Prosite
Prosite	SI.CL.28.cl.2869.Contig1	SI.CL.28.cl.2869.Contig1		GO:0006526	Prosite:PS00565|Prosite:PDOC00488	IEA		P	Argininosuccinate synthase signature 2		transcript	taxon:13686	20060427	Prosite
Prosite	SI.CL.28.cl.2888.Contig1	SI.CL.28.cl.2888.Contig1		GO:0003735	Prosite:PS00360|Prosite:PDOC00311	IEA		P	Ribosomal protein S9 signature		transcript	taxon:13686	20060427	Prosite
Prosite	SI.CL.28.cl.2888.Contig1	SI.CL.28.cl.2888.Contig1		GO:0006412	Prosite:PS00360|Prosite:PDOC00311	IEA		P	Ribosomal protein S9 signature		transcript	taxon:13686	20060427	Prosite
Prosite	SI.CL.28.cl.2888.Contig1	SI.CL.28.cl.2888.Contig1		GO:0005622	Prosite:PS00360|Prosite:PDOC00311	IEA		P	Ribosomal protein S9 signature		transcript	taxon:13686	20060427	Prosite
Prosite	SI.CL.28.cl.2888.Contig1	SI.CL.28.cl.2888.Contig1		GO:0005840	Prosite:PS00360|Prosite:PDOC00311	IEA		P	Ribosomal protein S9 signature		transcript	taxon:13686	20060427	Prosite
Prosite	SI.CL.28.cl.2897.Contig1	SI.CL.28.cl.2897.Contig1		GO:0004497	Prosite:PS00367|Prosite:PDOC00316	IEA		P	Biopterin-dependent aromatic amino acid hydroxylases signature		transcript	taxon:13686	20060427	Prosite
Prosite	SI.CL.28.cl.2897.Contig1	SI.CL.28.cl.2897.Contig1		GO:0005506	Prosite:PS00367|Prosite:PDOC00316	IEA		P	Biopterin-dependent aromatic amino acid hydroxylases signature		transcript	taxon:13686	20060427	Prosite
Prosite	SI.CL.28.cl.2897.Contig1	SI.CL.28.cl.2897.Contig1		GO:0009072	Prosite:PS00367|Prosite:PDOC00316	IEA		P	Biopterin-dependent aromatic amino acid hydroxylases signature		transcript	taxon:13686	20060427	Prosite
Prosite	SI.CL.29.cl.2938.Contig1	SI.CL.29.cl.2938.Contig1		GO:0003735	Prosite:PS00464|Prosite:PDOC00387	IEA		P	Ribosomal protein L22 signature		transcript	taxon:13686	20060427	Prosite
Prosite	SI.CL.29.cl.2938.Contig1	SI.CL.29.cl.2938.Contig1		GO:0006412	Prosite:PS00464|Prosite:PDOC00387	IEA		P	Ribosomal protein L22 signature		transcript	taxon:13686	20060427	Prosite
Prosite	SI.CL.29.cl.2938.Contig1	SI.CL.29.cl.2938.Contig1		GO:0005622	Prosite:PS00464|Prosite:PDOC00387	IEA		P	Ribosomal protein L22 signature		transcript	taxon:13686	20060427	Prosite
Prosite	SI.CL.29.cl.2938.Contig1	SI.CL.29.cl.2938.Contig1		GO:0005840	Prosite:PS00464|Prosite:PDOC00387	IEA		P	Ribosomal protein L22 signature		transcript	taxon:13686	20060427	Prosite
Prosite	SI.CL.29.cl.2963.Contig1	SI.CL.29.cl.2963.Contig1		GO:0000287	Prosite:PS00387|Prosite:PDOC00325	IEA		P	Inorganic pyrophosphatase signature		transcript	taxon:13686	20060427	Prosite
Prosite	SI.CL.29.cl.2963.Contig1	SI.CL.29.cl.2963.Contig1		GO:0004427	Prosite:PS00387|Prosite:PDOC00325	IEA		P	Inorganic pyrophosphatase signature		transcript	taxon:13686	20060427	Prosite
Prosite	SI.CL.29.cl.2963.Contig1	SI.CL.29.cl.2963.Contig1		GO:0006796	Prosite:PS00387|Prosite:PDOC00325	IEA		P	Inorganic pyrophosphatase signature		transcript	taxon:13686	20060427	Prosite
Prosite	SI.CL.29.cl.2963.Contig1	SI.CL.29.cl.2963.Contig1		GO:0005737	Prosite:PS00387|Prosite:PDOC00325	IEA		P	Inorganic pyrophosphatase signature		transcript	taxon:13686	20060427	Prosite
Prosite	SI.CL.29.cl.2967.Contig1	SI.CL.29.cl.2967.Contig1		GO:0006457	Prosite:PS00170|Prosite:PDOC00154	IEA		P	Cyclophilin-type peptidyl-prolyl cis-trans isomerase signature		transcript	taxon:13686	20060427	Prosite
Prosite	SI.CL.29.cl.2991.Contig1	SI.CL.29.cl.2991.Contig1		GO:0003993	Prosite:PS00778|Prosite:PDOC00538	IEA		P	Histidine acid phosphatases active site signature		transcript	taxon:13686	20060427	Prosite
Prosite	SI.CL.29.cl.2996.Contig1	SI.CL.29.cl.2996.Contig1		GO:0004252	Prosite:PS00134|Prosite:PDOC00124	IEA		P	Serine proteases, trypsin family, histidine active site		transcript	taxon:13686	20060427	Prosite
Prosite	SI.CL.29.cl.2996.Contig1	SI.CL.29.cl.2996.Contig1		GO:0006508	Prosite:PS00134|Prosite:PDOC00124	IEA		P	Serine proteases, trypsin family, histidine active site		transcript	taxon:13686	20060427	Prosite
Prosite	SI.CL.30.cl.3026.Contig1	SI.CL.30.cl.3026.Contig1		GO:0004713	Prosite:PS00109|Prosite:PDOC00100	IEA		P	Tyrosine protein kinases specific active-site signature		transcript	taxon:13686	20060427	Prosite
Prosite	SI.CL.30.cl.3026.Contig1	SI.CL.30.cl.3026.Contig1		GO:0005524	Prosite:PS00109|Prosite:PDOC00100	IEA		P	Tyrosine protein kinases specific active-site signature		transcript	taxon:13686	20060427	Prosite
Prosite	SI.CL.30.cl.3026.Contig1	SI.CL.30.cl.3026.Contig1		GO:0006468	Prosite:PS00109|Prosite:PDOC00100	IEA		P	Tyrosine protein kinases specific active-site signature		transcript	taxon:13686	20060427	Prosite
Prosite	SI.CL.30.cl.3047.Contig1	SI.CL.30.cl.3047.Contig1		GO:0004185	Prosite:PS00131|Prosite:PDOC00122	IEA		P	Serine carboxypeptidases, serine active site		transcript	taxon:13686	20060427	Prosite
Prosite	SI.CL.30.cl.3047.Contig1	SI.CL.30.cl.3047.Contig1		GO:0006508	Prosite:PS00131|Prosite:PDOC00122	IEA		P	Serine carboxypeptidases, serine active site		transcript	taxon:13686	20060427	Prosite
Prosite	SI.CL.30.cl.3047.Contig1	SI.CL.30.cl.3047.Contig1		GO:0004185	Prosite:PS00560|Prosite:PDOC00122	IEA		P	Serine carboxypeptidases, histidine active site		transcript	taxon:13686	20060427	Prosite
Prosite	SI.CL.30.cl.3047.Contig1	SI.CL.30.cl.3047.Contig1		GO:0006508	Prosite:PS00560|Prosite:PDOC00122	IEA		P	Serine carboxypeptidases, histidine active site		transcript	taxon:13686	20060427	Prosite
Prosite	SI.CL.31.cl.3105.Contig1	SI.CL.31.cl.3105.Contig1		GO:0006457	Prosite:PS00170|Prosite:PDOC00154	IEA		P	Cyclophilin-type peptidyl-prolyl cis-trans isomerase signature		transcript	taxon:13686	20060427	Prosite
Prosite	SI.CL.31.cl.3112.Contig1	SI.CL.31.cl.3112.Contig1		GO:0004379	Prosite:PS00976|Prosite:PDOC00752	IEA		P	Myristoyl-CoA:protein N-myristoyltransferase signature 2		transcript	taxon:13686	20060427	Prosite
Prosite	SI.CL.31.cl.3112.Contig1	SI.CL.31.cl.3112.Contig1		GO:0006499	Prosite:PS00976|Prosite:PDOC00752	IEA		P	Myristoyl-CoA:protein N-myristoyltransferase signature 2		transcript	taxon:13686	20060427	Prosite
Prosite	SI.CL.31.cl.3185.Contig1	SI.CL.31.cl.3185.Contig1		GO:0006464	Prosite:PS00299|Prosite:PDOC00271	IEA		P	Ubiquitin domain signature		transcript	taxon:13686	20060427	Prosite
Prosite	SI.CL.31.cl.3193.Contig1	SI.CL.31.cl.3193.Contig1		GO:0016763	Prosite:PS01240|Prosite:PDOC00954	IEA		P	Purine and other phosphorylases family 2 signature		transcript	taxon:13686	20060427	Prosite
Prosite	SI.CL.32.cl.3287.Contig1	SI.CL.32.cl.3287.Contig1		GO:0005509	Prosite:PS00018|Prosite:PDOC00018	IEA		P	EF-hand calcium-binding domain		transcript	taxon:13686	20060427	Prosite
Prosite	SI.CL.33.cl.3306.Contig1	SI.CL.33.cl.3306.Contig1		GO:0016787	Prosite:PS00125|Prosite:PDOC00115	IEA		P	Serine/threonine specific protein phosphatases signature		transcript	taxon:13686	20060427	Prosite
Prosite	SI.CL.33.cl.3322.Contig1	SI.CL.33.cl.3322.Contig1		GO:0004252	Prosite:PS00134|Prosite:PDOC00124	IEA		P	Serine proteases, trypsin family, histidine active site		transcript	taxon:13686	20060427	Prosite
Prosite	SI.CL.33.cl.3322.Contig1	SI.CL.33.cl.3322.Contig1		GO:0006508	Prosite:PS00134|Prosite:PDOC00124	IEA		P	Serine proteases, trypsin family, histidine active site		transcript	taxon:13686	20060427	Prosite
Prosite	SI.CL.33.cl.3334.Contig1	SI.CL.33.cl.3334.Contig1		GO:0005554	Prosite:PS01290|Prosite:PDOC00992	IEA		P	Enhancer of rudimentary signature		transcript	taxon:13686	20060427	Prosite
Prosite	SI.CL.33.cl.3334.Contig2	SI.CL.33.cl.3334.Contig2		GO:0005554	Prosite:PS01290|Prosite:PDOC00992	IEA		P	Enhancer of rudimentary signature		transcript	taxon:13686	20060427	Prosite
Prosite	SI.CL.34.cl.3440.Contig1	SI.CL.34.cl.3440.Contig1		GO:0004713	Prosite:PS00109|Prosite:PDOC00100	IEA		P	Tyrosine protein kinases specific active-site signature		transcript	taxon:13686	20060427	Prosite
Prosite	SI.CL.34.cl.3440.Contig1	SI.CL.34.cl.3440.Contig1		GO:0005524	Prosite:PS00109|Prosite:PDOC00100	IEA		P	Tyrosine protein kinases specific active-site signature		transcript	taxon:13686	20060427	Prosite
Prosite	SI.CL.34.cl.3440.Contig1	SI.CL.34.cl.3440.Contig1		GO:0006468	Prosite:PS00109|Prosite:PDOC00100	IEA		P	Tyrosine protein kinases specific active-site signature		transcript	taxon:13686	20060427	Prosite
Prosite	SI.CL.35.cl.3580.Contig1	SI.CL.35.cl.3580.Contig1		GO:0005215	Prosite:PS00213|Prosite:PDOC00187	IEA		P	Lipocalin signature		transcript	taxon:13686	20060427	Prosite
Prosite	SI.CL.35.cl.3580.Contig1	SI.CL.35.cl.3580.Contig1		GO:0005488	Prosite:PS00213|Prosite:PDOC00187	IEA		P	Lipocalin signature		transcript	taxon:13686	20060427	Prosite
Prosite	SI.CL.35.cl.3580.Contig1	SI.CL.35.cl.3580.Contig1		GO:0006810	Prosite:PS00213|Prosite:PDOC00187	IEA		P	Lipocalin signature		transcript	taxon:13686	20060427	Prosite
Prosite	SI.CL.35.cl.3581.Contig1	SI.CL.35.cl.3581.Contig1		GO:0016616	Prosite:PS00671|Prosite:PDOC00063	IEA		P	D-isomer specific 2-hydroxyacid dehydrogenases signature 3		transcript	taxon:13686	20060427	Prosite
Prosite	SI.CL.35.cl.3581.Contig1	SI.CL.35.cl.3581.Contig1		GO:0006564	Prosite:PS00671|Prosite:PDOC00063	IEA		P	D-isomer specific 2-hydroxyacid dehydrogenases signature 3		transcript	taxon:13686	20060427	Prosite
Prosite	SI.CL.35.cl.3593.Contig1	SI.CL.35.cl.3593.Contig1		GO:0005975	Prosite:PS00933|Prosite:PDOC00408	IEA		P	FGGY family of carbohydrate kinases signature 1		transcript	taxon:13686	20060427	Prosite
Prosite	SI.CL.35.cl.3594.Contig1	SI.CL.35.cl.3594.Contig1		GO:0004252	Prosite:PS00135|Prosite:PDOC00124	IEA		P	Serine proteases, trypsin family, serine active site		transcript	taxon:13686	20060427	Prosite
Prosite	SI.CL.35.cl.3594.Contig1	SI.CL.35.cl.3594.Contig1		GO:0006508	Prosite:PS00135|Prosite:PDOC00124	IEA		P	Serine proteases, trypsin family, serine active site		transcript	taxon:13686	20060427	Prosite
Prosite	SI.CL.35.cl.3596.Contig1	SI.CL.35.cl.3596.Contig1		GO:0005975	Prosite:PS00445|Prosite:PDOC00408	IEA		P	FGGY family of carbohydrate kinases signature 2		transcript	taxon:13686	20060427	Prosite
Prosite	SI.CL.36.cl.3606.Contig1	SI.CL.36.cl.3606.Contig1		GO:0005524	Prosite:PS00674|Prosite:PDOC00572	IEA		P	AAA-protein family signature		transcript	taxon:13686	20060427	Prosite
Prosite	SI.CL.36.cl.3634.Contig1	SI.CL.36.cl.3634.Contig1		GO:0005509	Prosite:PS00018|Prosite:PDOC00018	IEA		P	EF-hand calcium-binding domain		transcript	taxon:13686	20060427	Prosite
Prosite	SI.CL.36.cl.3675.Contig1	SI.CL.36.cl.3675.Contig1		GO:0003700	Prosite:PS00031|Prosite:PDOC00031	IEA		P	Nuclear hormones receptors DNA-binding region signature		transcript	taxon:13686	20060427	Prosite
Prosite	SI.CL.36.cl.3675.Contig1	SI.CL.36.cl.3675.Contig1		GO:0008270	Prosite:PS00031|Prosite:PDOC00031	IEA		P	Nuclear hormones receptors DNA-binding region signature		transcript	taxon:13686	20060427	Prosite
Prosite	SI.CL.36.cl.3675.Contig1	SI.CL.36.cl.3675.Contig1		GO:0043565	Prosite:PS00031|Prosite:PDOC00031	IEA		P	Nuclear hormones receptors DNA-binding region signature		transcript	taxon:13686	20060427	Prosite
Prosite	SI.CL.36.cl.3675.Contig1	SI.CL.36.cl.3675.Contig1		GO:0006355	Prosite:PS00031|Prosite:PDOC00031	IEA		P	Nuclear hormones receptors DNA-binding region signature		transcript	taxon:13686	20060427	Prosite
Prosite	SI.CL.36.cl.3675.Contig1	SI.CL.36.cl.3675.Contig1		GO:0005634	Prosite:PS00031|Prosite:PDOC00031	IEA		P	Nuclear hormones receptors DNA-binding region signature		transcript	taxon:13686	20060427	Prosite
Prosite	SI.CL.36.cl.3699.Contig1	SI.CL.36.cl.3699.Contig1		GO:0001584	Prosite:PS00237|Prosite:PDOC00210	IEA		P	G-protein coupled receptors family 1 signature		transcript	taxon:13686	20060427	Prosite
Prosite	SI.CL.36.cl.3699.Contig1	SI.CL.36.cl.3699.Contig1		GO:0007186	Prosite:PS00237|Prosite:PDOC00210	IEA		P	G-protein coupled receptors family 1 signature		transcript	taxon:13686	20060427	Prosite
Prosite	SI.CL.36.cl.3699.Contig1	SI.CL.36.cl.3699.Contig1		GO:0016021	Prosite:PS00237|Prosite:PDOC00210	IEA		P	G-protein coupled receptors family 1 signature		transcript	taxon:13686	20060427	Prosite
Prosite	SI.CL.37.cl.3779.Contig1	SI.CL.37.cl.3779.Contig1		GO:0004721	Prosite:PS00383|Prosite:PDOC00323	IEA		P	Tyrosine specific protein phosphatases active site		transcript	taxon:13686	20060427	Prosite
Prosite	SI.CL.37.cl.3779.Contig1	SI.CL.37.cl.3779.Contig1		GO:0006470	Prosite:PS00383|Prosite:PDOC00323	IEA		P	Tyrosine specific protein phosphatases active site		transcript	taxon:13686	20060427	Prosite
Prosite	SI.CL.38.cl.3834.Contig1	SI.CL.38.cl.3834.Contig1		GO:0003779	Prosite:PS00019|Prosite:PDOC00019	IEA		P	Actinin-type actin-binding domain signature 1		transcript	taxon:13686	20060427	Prosite
Prosite	SI.CL.38.cl.3873.Contig1	SI.CL.38.cl.3873.Contig1		GO:0008237	Prosite:PS00759|Prosite:PDOC00613	IEA		P	ArgE / dapE / ACY1 / CPG2 / yscS family signature 2		transcript	taxon:13686	20060427	Prosite
Prosite	SI.CL.38.cl.3873.Contig1	SI.CL.38.cl.3873.Contig1		GO:0006508	Prosite:PS00759|Prosite:PDOC00613	IEA		P	ArgE / dapE / ACY1 / CPG2 / yscS family signature 2		transcript	taxon:13686	20060427	Prosite
Prosite	SI.CL.38.cl.3875.Contig1	SI.CL.38.cl.3875.Contig1		GO:0005509	Prosite:PS00018|Prosite:PDOC00018	IEA		P	EF-hand calcium-binding domain		transcript	taxon:13686	20060427	Prosite
Prosite	SI.CL.38.cl.3893.Contig1	SI.CL.38.cl.3893.Contig1		GO:0005489	Prosite:PS00194|Prosite:PDOC00172	IEA		P	Thioredoxin family active site		transcript	taxon:13686	20060427	Prosite
Prosite	SI.CL.38.cl.3893.Contig1	SI.CL.38.cl.3893.Contig1		GO:0006118	Prosite:PS00194|Prosite:PDOC00172	IEA		P	Thioredoxin family active site		transcript	taxon:13686	20060427	Prosite
Prosite	SI.CL.38.cl.3897.Contig1	SI.CL.38.cl.3897.Contig1		GO:0005554	Prosite:PS01227|Prosite:PDOC00943	IEA		P	Uncharacterized protein family UPF0012 signature		transcript	taxon:13686	20060427	Prosite
Prosite	SI.CL.39.cl.3966.Contig1	SI.CL.39.cl.3966.Contig1		GO:0005509	Prosite:PS00018|Prosite:PDOC00018	IEA		P	EF-hand calcium-binding domain		transcript	taxon:13686	20060427	Prosite
Prosite	SI.CL.40.cl.4002.Contig1	SI.CL.40.cl.4002.Contig1		GO:0043565	Prosite:PS00685|Prosite:PDOC00578	IEA		P	NF-YB/HAP3 subunit signature		transcript	taxon:13686	20060427	Prosite
Prosite	SI.CL.40.cl.4002.Contig1	SI.CL.40.cl.4002.Contig1		GO:0006355	Prosite:PS00685|Prosite:PDOC00578	IEA		P	NF-YB/HAP3 subunit signature		transcript	taxon:13686	20060427	Prosite
Prosite	SI.CL.40.cl.4002.Contig1	SI.CL.40.cl.4002.Contig1		GO:0005634	Prosite:PS00685|Prosite:PDOC00578	IEA		P	NF-YB/HAP3 subunit signature		transcript	taxon:13686	20060427	Prosite
Prosite	SI.CL.40.cl.4026.Contig1	SI.CL.40.cl.4026.Contig1		GO:0004013	Prosite:PS00739|Prosite:PDOC00603	IEA		P	S-adenosyl-L-homocysteine hydrolase signature 2		transcript	taxon:13686	20060427	Prosite
Prosite	SI.CL.40.cl.4026.Contig1	SI.CL.40.cl.4026.Contig1		GO:0006730	Prosite:PS00739|Prosite:PDOC00603	IEA		P	S-adenosyl-L-homocysteine hydrolase signature 2		transcript	taxon:13686	20060427	Prosite
Prosite	SI.CL.40.cl.4029.Contig1	SI.CL.40.cl.4029.Contig1		GO:0005515	Prosite:PS00518|Prosite:PDOC00449	IEA		P	Zinc finger RING-type signature		transcript	taxon:13686	20060427	Prosite
Prosite	SI.CL.40.cl.4029.Contig1	SI.CL.40.cl.4029.Contig1		GO:0008270	Prosite:PS00518|Prosite:PDOC00449	IEA		P	Zinc finger RING-type signature		transcript	taxon:13686	20060427	Prosite
Prosite	SI.CL.40.cl.4070.Contig1	SI.CL.40.cl.4070.Contig1		GO:0005576	Prosite:PS01009|Prosite:PDOC00772	IEA		P	CRISP family signature 1		transcript	taxon:13686	20060427	Prosite
Prosite	SI.CL.40.cl.4079.Contig1	SI.CL.40.cl.4079.Contig1		GO:0003735	Prosite:PS00580|Prosite:PDOC00502	IEA		P	Ribosomal protein L32e signature		transcript	taxon:13686	20060427	Prosite
Prosite	SI.CL.40.cl.4079.Contig1	SI.CL.40.cl.4079.Contig1		GO:0006412	Prosite:PS00580|Prosite:PDOC00502	IEA		P	Ribosomal protein L32e signature		transcript	taxon:13686	20060427	Prosite
Prosite	SI.CL.40.cl.4079.Contig1	SI.CL.40.cl.4079.Contig1		GO:0005622	Prosite:PS00580|Prosite:PDOC00502	IEA		P	Ribosomal protein L32e signature		transcript	taxon:13686	20060427	Prosite
Prosite	SI.CL.40.cl.4079.Contig1	SI.CL.40.cl.4079.Contig1		GO:0005840	Prosite:PS00580|Prosite:PDOC00502	IEA		P	Ribosomal protein L32e signature		transcript	taxon:13686	20060427	Prosite
Prosite	SI.CL.40.cl.4099.Contig1	SI.CL.40.cl.4099.Contig1		GO:0016597	Prosite:PS00097|Prosite:PDOC00091	IEA		P	Aspartate and ornithine carbamoyltransferases signature		transcript	taxon:13686	20060427	Prosite
Prosite	SI.CL.40.cl.4099.Contig1	SI.CL.40.cl.4099.Contig1		GO:0016743	Prosite:PS00097|Prosite:PDOC00091	IEA		P	Aspartate and ornithine carbamoyltransferases signature		transcript	taxon:13686	20060427	Prosite
Prosite	SI.CL.40.cl.4099.Contig1	SI.CL.40.cl.4099.Contig1		GO:0006520	Prosite:PS00097|Prosite:PDOC00091	IEA		P	Aspartate and ornithine carbamoyltransferases signature		transcript	taxon:13686	20060427	Prosite
Prosite	SI.CL.41.cl.4121.Contig1	SI.CL.41.cl.4121.Contig1		GO:0005184	Prosite:PS00539|Prosite:PDOC00466	IEA		P	Pyrokinins signature		transcript	taxon:13686	20060427	Prosite
Prosite	SI.CL.41.cl.4121.Contig1	SI.CL.41.cl.4121.Contig1		GO:0007218	Prosite:PS00539|Prosite:PDOC00466	IEA		P	Pyrokinins signature		transcript	taxon:13686	20060427	Prosite
Prosite	SI.CL.41.cl.4124.Contig1	SI.CL.41.cl.4124.Contig1		GO:0031072	Prosite:PS00636|Prosite:PDOC00553	IEA		P	Nt-dnaJ domain signature		transcript	taxon:13686	20060427	Prosite
Prosite	SI.CL.41.cl.4138.Contig1	SI.CL.41.cl.4138.Contig1		GO:0003735	Prosite:PS01108|Prosite:PDOC00852	IEA		P	Ribosomal protein L24 signature		transcript	taxon:13686	20060427	Prosite
Prosite	SI.CL.41.cl.4138.Contig1	SI.CL.41.cl.4138.Contig1		GO:0006412	Prosite:PS01108|Prosite:PDOC00852	IEA		P	Ribosomal protein L24 signature		transcript	taxon:13686	20060427	Prosite
Prosite	SI.CL.41.cl.4138.Contig1	SI.CL.41.cl.4138.Contig1		GO:0005622	Prosite:PS01108|Prosite:PDOC00852	IEA		P	Ribosomal protein L24 signature		transcript	taxon:13686	20060427	Prosite
Prosite	SI.CL.41.cl.4138.Contig1	SI.CL.41.cl.4138.Contig1		GO:0005840	Prosite:PS01108|Prosite:PDOC00852	IEA		P	Ribosomal protein L24 signature		transcript	taxon:13686	20060427	Prosite
Prosite	SI.CL.41.cl.4140.Contig1	SI.CL.41.cl.4140.Contig1		GO:0004197	Prosite:PS00973|Prosite:PDOC00750	IEA		P	Ubiquitin carboxyl-terminal hydrolases family 2 signature 2		transcript	taxon:13686	20060427	Prosite
Prosite	SI.CL.41.cl.4140.Contig1	SI.CL.41.cl.4140.Contig1		GO:0004221	Prosite:PS00973|Prosite:PDOC00750	IEA		P	Ubiquitin carboxyl-terminal hydrolases family 2 signature 2		transcript	taxon:13686	20060427	Prosite
Prosite	SI.CL.41.cl.4140.Contig1	SI.CL.41.cl.4140.Contig1		GO:0006511	Prosite:PS00973|Prosite:PDOC00750	IEA		P	Ubiquitin carboxyl-terminal hydrolases family 2 signature 2		transcript	taxon:13686	20060427	Prosite
Prosite	SI.CL.42.cl.4218.Contig1	SI.CL.42.cl.4218.Contig1		GO:0004785	Prosite:PS00087|Prosite:PDOC00082	IEA		P	Copper/Zinc superoxide dismutase signature 1		transcript	taxon:13686	20060427	Prosite
Prosite	SI.CL.42.cl.4218.Contig1	SI.CL.42.cl.4218.Contig1		GO:0046872	Prosite:PS00087|Prosite:PDOC00082	IEA		P	Copper/Zinc superoxide dismutase signature 1		transcript	taxon:13686	20060427	Prosite
Prosite	SI.CL.42.cl.4218.Contig1	SI.CL.42.cl.4218.Contig1		GO:0006801	Prosite:PS00087|Prosite:PDOC00082	IEA		P	Copper/Zinc superoxide dismutase signature 1		transcript	taxon:13686	20060427	Prosite
Prosite	SI.CL.42.cl.4218.Contig1	SI.CL.42.cl.4218.Contig1		GO:0004785	Prosite:PS00332|Prosite:PDOC00082	IEA		P	Copper/Zinc superoxide dismutase signature 2		transcript	taxon:13686	20060427	Prosite
Prosite	SI.CL.42.cl.4218.Contig1	SI.CL.42.cl.4218.Contig1		GO:0046872	Prosite:PS00332|Prosite:PDOC00082	IEA		P	Copper/Zinc superoxide dismutase signature 2		transcript	taxon:13686	20060427	Prosite
Prosite	SI.CL.42.cl.4218.Contig1	SI.CL.42.cl.4218.Contig1		GO:0006801	Prosite:PS00332|Prosite:PDOC00082	IEA		P	Copper/Zinc superoxide dismutase signature 2		transcript	taxon:13686	20060427	Prosite
Prosite	SI.CL.42.cl.4241.Contig1	SI.CL.42.cl.4241.Contig1		GO:0004252	Prosite:PS00134|Prosite:PDOC00124	IEA		P	Serine proteases, trypsin family, histidine active site		transcript	taxon:13686	20060427	Prosite
Prosite	SI.CL.42.cl.4241.Contig1	SI.CL.42.cl.4241.Contig1		GO:0006508	Prosite:PS00134|Prosite:PDOC00124	IEA		P	Serine proteases, trypsin family, histidine active site		transcript	taxon:13686	20060427	Prosite
Prosite	SI.CL.42.cl.4250.Contig1	SI.CL.42.cl.4250.Contig1		GO:0005524	Prosite:PS00152|Prosite:PDOC00137	IEA		P	ATP synthase alpha and beta subunits signature		transcript	taxon:13686	20060427	Prosite
Prosite	SI.CL.42.cl.4250.Contig1	SI.CL.42.cl.4250.Contig1		GO:0046933	Prosite:PS00152|Prosite:PDOC00137	IEA		P	ATP synthase alpha and beta subunits signature		transcript	taxon:13686	20060427	Prosite
Prosite	SI.CL.42.cl.4250.Contig1	SI.CL.42.cl.4250.Contig1		GO:0046961	Prosite:PS00152|Prosite:PDOC00137	IEA		P	ATP synthase alpha and beta subunits signature		transcript	taxon:13686	20060427	Prosite
Prosite	SI.CL.42.cl.4250.Contig1	SI.CL.42.cl.4250.Contig1		GO:0015986	Prosite:PS00152|Prosite:PDOC00137	IEA		P	ATP synthase alpha and beta subunits signature		transcript	taxon:13686	20060427	Prosite
Prosite	SI.CL.42.cl.4250.Contig1	SI.CL.42.cl.4250.Contig1		GO:0016469	Prosite:PS00152|Prosite:PDOC00137	IEA		P	ATP synthase alpha and beta subunits signature		transcript	taxon:13686	20060427	Prosite
Prosite	SI.CL.42.cl.4252.Contig1	SI.CL.42.cl.4252.Contig1		GO:0003676	Prosite:PS00028|Prosite:PDOC00028	IEA		P	Zinc finger C2H2 type domain signature		transcript	taxon:13686	20060427	Prosite
Prosite	SI.CL.42.cl.4252.Contig1	SI.CL.42.cl.4252.Contig1		GO:0008270	Prosite:PS00028|Prosite:PDOC00028	IEA		P	Zinc finger C2H2 type domain signature		transcript	taxon:13686	20060427	Prosite
Prosite	SI.CL.42.cl.4252.Contig1	SI.CL.42.cl.4252.Contig1		GO:0005634	Prosite:PS00028|Prosite:PDOC00028	IEA		P	Zinc finger C2H2 type domain signature		transcript	taxon:13686	20060427	Prosite
Prosite	SI.CL.42.cl.4256.Contig1	SI.CL.42.cl.4256.Contig1		GO:0004497	Prosite:PS00086|Prosite:PDOC00081	IEA		P	Cytochrome P450 cysteine heme-iron ligand signature		transcript	taxon:13686	20060427	Prosite
Prosite	SI.CL.42.cl.4256.Contig1	SI.CL.42.cl.4256.Contig1		GO:0005506	Prosite:PS00086|Prosite:PDOC00081	IEA		P	Cytochrome P450 cysteine heme-iron ligand signature		transcript	taxon:13686	20060427	Prosite
Prosite	SI.CL.42.cl.4256.Contig1	SI.CL.42.cl.4256.Contig1		GO:0020037	Prosite:PS00086|Prosite:PDOC00081	IEA		P	Cytochrome P450 cysteine heme-iron ligand signature		transcript	taxon:13686	20060427	Prosite
Prosite	SI.CL.42.cl.4256.Contig1	SI.CL.42.cl.4256.Contig1		GO:0006118	Prosite:PS00086|Prosite:PDOC00081	IEA		P	Cytochrome P450 cysteine heme-iron ligand signature		transcript	taxon:13686	20060427	Prosite
Prosite	SI.CL.42.cl.4273.Contig1	SI.CL.42.cl.4273.Contig1		GO:0003824	Prosite:PS00120|Prosite:PDOC00110	IEA		P	Lipases, serine active site		transcript	taxon:13686	20060427	Prosite
Prosite	SI.CL.43.cl.4338.Contig1	SI.CL.43.cl.4338.Contig1		GO:0004497	Prosite:PS00086|Prosite:PDOC00081	IEA		P	Cytochrome P450 cysteine heme-iron ligand signature		transcript	taxon:13686	20060427	Prosite
Prosite	SI.CL.43.cl.4338.Contig1	SI.CL.43.cl.4338.Contig1		GO:0005506	Prosite:PS00086|Prosite:PDOC00081	IEA		P	Cytochrome P450 cysteine heme-iron ligand signature		transcript	taxon:13686	20060427	Prosite
Prosite	SI.CL.43.cl.4338.Contig1	SI.CL.43.cl.4338.Contig1		GO:0020037	Prosite:PS00086|Prosite:PDOC00081	IEA		P	Cytochrome P450 cysteine heme-iron ligand signature		transcript	taxon:13686	20060427	Prosite
Prosite	SI.CL.43.cl.4338.Contig1	SI.CL.43.cl.4338.Contig1		GO:0006118	Prosite:PS00086|Prosite:PDOC00081	IEA		P	Cytochrome P450 cysteine heme-iron ligand signature		transcript	taxon:13686	20060427	Prosite
Prosite	SI.CL.1.cl.128.SiJWD08BDC2.scf	SI.CL.1.cl.128.SiJWD08BDC2.scf		GO:0016491	Prosite:PS00063|Prosite:PDOC00061	IEA		P	Aldo/keto reductase family putative active site signature		transcript	taxon:13686	20060427	Prosite
Prosite	SI.CL.3.cl.310.SiJWE07CAJ2.scf	SI.CL.3.cl.310.SiJWE07CAJ2.scf		GO:0003735	Prosite:PS00529|Prosite:PDOC00458	IEA		P	Ribosomal protein S24e signature		transcript	taxon:13686	20060427	Prosite
Prosite	SI.CL.3.cl.310.SiJWE07CAJ2.scf	SI.CL.3.cl.310.SiJWE07CAJ2.scf		GO:0006412	Prosite:PS00529|Prosite:PDOC00458	IEA		P	Ribosomal protein S24e signature		transcript	taxon:13686	20060427	Prosite
Prosite	SI.CL.3.cl.310.SiJWE07CAJ2.scf	SI.CL.3.cl.310.SiJWE07CAJ2.scf		GO:0005622	Prosite:PS00529|Prosite:PDOC00458	IEA		P	Ribosomal protein S24e signature		transcript	taxon:13686	20060427	Prosite
Prosite	SI.CL.3.cl.310.SiJWE07CAJ2.scf	SI.CL.3.cl.310.SiJWE07CAJ2.scf		GO:0005840	Prosite:PS00529|Prosite:PDOC00458	IEA		P	Ribosomal protein S24e signature		transcript	taxon:13686	20060427	Prosite
Prosite	SI.CL.5.cl.528.SiJWF07ACN.scf	SI.CL.5.cl.528.SiJWF07ACN.scf		GO:0003735	Prosite:PS01199|Prosite:PDOC00922	IEA		P	Ribosomal protein L1 signature		transcript	taxon:13686	20060427	Prosite
Prosite	SI.CL.5.cl.528.SiJWF07ACN.scf	SI.CL.5.cl.528.SiJWF07ACN.scf		GO:0006412	Prosite:PS01199|Prosite:PDOC00922	IEA		P	Ribosomal protein L1 signature		transcript	taxon:13686	20060427	Prosite
Prosite	SI.CL.5.cl.528.SiJWF07ACN.scf	SI.CL.5.cl.528.SiJWF07ACN.scf		GO:0005622	Prosite:PS01199|Prosite:PDOC00922	IEA		P	Ribosomal protein L1 signature		transcript	taxon:13686	20060427	Prosite
Prosite	SI.CL.5.cl.528.SiJWF07ACN.scf	SI.CL.5.cl.528.SiJWF07ACN.scf		GO:0005840	Prosite:PS01199|Prosite:PDOC00922	IEA		P	Ribosomal protein L1 signature		transcript	taxon:13686	20060427	Prosite
Prosite	SI.CL.6.cl.611.SiJWC04ABD.scf	SI.CL.6.cl.611.SiJWC04ABD.scf		GO:0006464	Prosite:PS00299|Prosite:PDOC00271	IEA		P	Ubiquitin domain signature		transcript	taxon:13686	20060427	Prosite
Prosite	SI.CL.6.cl.611.SiJWF07AAP.scf	SI.CL.6.cl.611.SiJWF07AAP.scf		GO:0006464	Prosite:PS00299|Prosite:PDOC00271	IEA		P	Ubiquitin domain signature		transcript	taxon:13686	20060427	Prosite
Prosite	SI.CL.7.cl.784.SiJWE06ACM.scf	SI.CL.7.cl.784.SiJWE06ACM.scf		GO:0004252	Prosite:PS00134|Prosite:PDOC00124	IEA		P	Serine proteases, trypsin family, histidine active site		transcript	taxon:13686	20060427	Prosite
Prosite	SI.CL.7.cl.784.SiJWE06ACM.scf	SI.CL.7.cl.784.SiJWE06ACM.scf		GO:0006508	Prosite:PS00134|Prosite:PDOC00124	IEA		P	Serine proteases, trypsin family, histidine active site		transcript	taxon:13686	20060427	Prosite
Prosite	SI.CL.7.cl.784.SiJWH12BAP.scf	SI.CL.7.cl.784.SiJWH12BAP.scf		GO:0004252	Prosite:PS00134|Prosite:PDOC00124	IEA		P	Serine proteases, trypsin family, histidine active site		transcript	taxon:13686	20060427	Prosite
Prosite	SI.CL.7.cl.784.SiJWH12BAP.scf	SI.CL.7.cl.784.SiJWH12BAP.scf		GO:0006508	Prosite:PS00134|Prosite:PDOC00124	IEA		P	Serine proteases, trypsin family, histidine active site		transcript	taxon:13686	20060427	Prosite
Prosite	SI.CL.7.cl.784.SiJWH02ABP2.scf	SI.CL.7.cl.784.SiJWH02ABP2.scf		GO:0004252	Prosite:PS00134|Prosite:PDOC00124	IEA		P	Serine proteases, trypsin family, histidine active site		transcript	taxon:13686	20060427	Prosite
Prosite	SI.CL.7.cl.784.SiJWH02ABP2.scf	SI.CL.7.cl.784.SiJWH02ABP2.scf		GO:0006508	Prosite:PS00134|Prosite:PDOC00124	IEA		P	Serine proteases, trypsin family, histidine active site		transcript	taxon:13686	20060427	Prosite
Prosite	SI.CL.9.cl.966.SiJWC09BDX.scf	SI.CL.9.cl.966.SiJWC09BDX.scf		GO:0006520	Prosite:PS00165|Prosite:PDOC00149	IEA		P	Serine/threonine dehydratases pyridoxal-phosphate attachment site		transcript	taxon:13686	20060427	Prosite
Prosite	SI.CL.9.cl.992.SiJWC04ACU.scf	SI.CL.9.cl.992.SiJWC04ACU.scf		GO:0004175	Prosite:PS00388|Prosite:PDOC00326	IEA		P	Proteasome A-type subunits signature		transcript	taxon:13686	20060427	Prosite
Prosite	SI.CL.9.cl.992.SiJWC04ACU.scf	SI.CL.9.cl.992.SiJWC04ACU.scf		GO:0006511	Prosite:PS00388|Prosite:PDOC00326	IEA		P	Proteasome A-type subunits signature		transcript	taxon:13686	20060427	Prosite
Prosite	SI.CL.9.cl.992.SiJWC04ACU.scf	SI.CL.9.cl.992.SiJWC04ACU.scf		GO:0005839	Prosite:PS00388|Prosite:PDOC00326	IEA		P	Proteasome A-type subunits signature		transcript	taxon:13686	20060427	Prosite
Prosite	SI.CL.9.cl.992.SiJWC04ACU.scf	SI.CL.9.cl.992.SiJWC04ACU.scf		GO:0004175	Prosite:PS00854|Prosite:PDOC00668	IEA		P	Proteasome B-type subunits signature		transcript	taxon:13686	20060427	Prosite
Prosite	SI.CL.9.cl.992.SiJWC04ACU.scf	SI.CL.9.cl.992.SiJWC04ACU.scf		GO:0006511	Prosite:PS00854|Prosite:PDOC00668	IEA		P	Proteasome B-type subunits signature		transcript	taxon:13686	20060427	Prosite
Prosite	SI.CL.9.cl.992.SiJWC04ACU.scf	SI.CL.9.cl.992.SiJWC04ACU.scf		GO:0005839	Prosite:PS00854|Prosite:PDOC00668	IEA		P	Proteasome B-type subunits signature		transcript	taxon:13686	20060427	Prosite
Prosite	SI.CL.9.cl.992.SiJWE10_pcr3_tag.scf	SI.CL.9.cl.992.SiJWE10_pcr3_tag.scf		GO:0004175	Prosite:PS00388|Prosite:PDOC00326	IEA		P	Proteasome A-type subunits signature		transcript	taxon:13686	20060427	Prosite
Prosite	SI.CL.9.cl.992.SiJWE10_pcr3_tag.scf	SI.CL.9.cl.992.SiJWE10_pcr3_tag.scf		GO:0006511	Prosite:PS00388|Prosite:PDOC00326	IEA		P	Proteasome A-type subunits signature		transcript	taxon:13686	20060427	Prosite
Prosite	SI.CL.9.cl.992.SiJWE10_pcr3_tag.scf	SI.CL.9.cl.992.SiJWE10_pcr3_tag.scf		GO:0005839	Prosite:PS00388|Prosite:PDOC00326	IEA		P	Proteasome A-type subunits signature		transcript	taxon:13686	20060427	Prosite
Prosite	SI.CL.9.cl.992.SiJWE10_pcr3_tag.scf	SI.CL.9.cl.992.SiJWE10_pcr3_tag.scf		GO:0004175	Prosite:PS00854|Prosite:PDOC00668	IEA		P	Proteasome B-type subunits signature		transcript	taxon:13686	20060427	Prosite
Prosite	SI.CL.9.cl.992.SiJWE10_pcr3_tag.scf	SI.CL.9.cl.992.SiJWE10_pcr3_tag.scf		GO:0006511	Prosite:PS00854|Prosite:PDOC00668	IEA		P	Proteasome B-type subunits signature		transcript	taxon:13686	20060427	Prosite
Prosite	SI.CL.9.cl.992.SiJWE10_pcr3_tag.scf	SI.CL.9.cl.992.SiJWE10_pcr3_tag.scf		GO:0005839	Prosite:PS00854|Prosite:PDOC00668	IEA		P	Proteasome B-type subunits signature		transcript	taxon:13686	20060427	Prosite
Prosite	SI.CL.10.cl.1010.SiJWA05BAY2.scf	SI.CL.10.cl.1010.SiJWA05BAY2.scf		GO:0005215	Prosite:PS00213|Prosite:PDOC00187	IEA		P	Lipocalin signature		transcript	taxon:13686	20060427	Prosite
Prosite	SI.CL.10.cl.1010.SiJWA05BAY2.scf	SI.CL.10.cl.1010.SiJWA05BAY2.scf		GO:0005488	Prosite:PS00213|Prosite:PDOC00187	IEA		P	Lipocalin signature		transcript	taxon:13686	20060427	Prosite
Prosite	SI.CL.10.cl.1010.SiJWA05BAY2.scf	SI.CL.10.cl.1010.SiJWA05BAY2.scf		GO:0006810	Prosite:PS00213|Prosite:PDOC00187	IEA		P	Lipocalin signature		transcript	taxon:13686	20060427	Prosite
Prosite	SI.CL.11.cl.1136.SiJWC09ABI.scf	SI.CL.11.cl.1136.SiJWC09ABI.scf		GO:0003682	Prosite:PS00598|Prosite:PDOC00517	IEA		P	Chromo domain signature		transcript	taxon:13686	20060427	Prosite
Prosite	SI.CL.11.cl.1136.SiJWC09ABI.scf	SI.CL.11.cl.1136.SiJWC09ABI.scf		GO:0006333	Prosite:PS00598|Prosite:PDOC00517	IEA		P	Chromo domain signature		transcript	taxon:13686	20060427	Prosite
Prosite	SI.CL.11.cl.1136.SiJWC09ABI.scf	SI.CL.11.cl.1136.SiJWC09ABI.scf		GO:0000785	Prosite:PS00598|Prosite:PDOC00517	IEA		P	Chromo domain signature		transcript	taxon:13686	20060427	Prosite
Prosite	SI.CL.11.cl.1136.SiJWC09ABI.scf	SI.CL.11.cl.1136.SiJWC09ABI.scf		GO:0005634	Prosite:PS00598|Prosite:PDOC00517	IEA		P	Chromo domain signature		transcript	taxon:13686	20060427	Prosite
Prosite	SI.CL.16.cl.1685.SiJWH05BBR.scf	SI.CL.16.cl.1685.SiJWH05BBR.scf		GO:0003676	Prosite:PS01070|Prosite:PDOC00821	IEA		P	DNA/RNA non-specific endonucleases active site		transcript	taxon:13686	20060427	Prosite
Prosite	SI.CL.16.cl.1685.SiJWH05BBR.scf	SI.CL.16.cl.1685.SiJWH05BBR.scf		GO:0004519	Prosite:PS01070|Prosite:PDOC00821	IEA		P	DNA/RNA non-specific endonucleases active site		transcript	taxon:13686	20060427	Prosite
Prosite	SI.CL.18.cl.1800.SiJWG09AAY.scf	SI.CL.18.cl.1800.SiJWG09AAY.scf		GO:0003735	Prosite:PS00712|Prosite:PDOC00590	IEA		P	Ribosomal protein S17e signature		transcript	taxon:13686	20060427	Prosite
Prosite	SI.CL.18.cl.1800.SiJWG09AAY.scf	SI.CL.18.cl.1800.SiJWG09AAY.scf		GO:0006412	Prosite:PS00712|Prosite:PDOC00590	IEA		P	Ribosomal protein S17e signature		transcript	taxon:13686	20060427	Prosite
Prosite	SI.CL.18.cl.1800.SiJWG09AAY.scf	SI.CL.18.cl.1800.SiJWG09AAY.scf		GO:0005622	Prosite:PS00712|Prosite:PDOC00590	IEA		P	Ribosomal protein S17e signature		transcript	taxon:13686	20060427	Prosite
Prosite	SI.CL.18.cl.1800.SiJWG09AAY.scf	SI.CL.18.cl.1800.SiJWG09AAY.scf		GO:0005840	Prosite:PS00712|Prosite:PDOC00590	IEA		P	Ribosomal protein S17e signature		transcript	taxon:13686	20060427	Prosite
Prosite	SI.CL.18.cl.1800.SiJWH06CAC2.scf	SI.CL.18.cl.1800.SiJWH06CAC2.scf		GO:0003735	Prosite:PS00712|Prosite:PDOC00590	IEA		P	Ribosomal protein S17e signature		transcript	taxon:13686	20060427	Prosite
Prosite	SI.CL.18.cl.1800.SiJWH06CAC2.scf	SI.CL.18.cl.1800.SiJWH06CAC2.scf		GO:0006412	Prosite:PS00712|Prosite:PDOC00590	IEA		P	Ribosomal protein S17e signature		transcript	taxon:13686	20060427	Prosite
Prosite	SI.CL.18.cl.1800.SiJWH06CAC2.scf	SI.CL.18.cl.1800.SiJWH06CAC2.scf		GO:0005622	Prosite:PS00712|Prosite:PDOC00590	IEA		P	Ribosomal protein S17e signature		transcript	taxon:13686	20060427	Prosite
Prosite	SI.CL.18.cl.1800.SiJWH06CAC2.scf	SI.CL.18.cl.1800.SiJWH06CAC2.scf		GO:0005840	Prosite:PS00712|Prosite:PDOC00590	IEA		P	Ribosomal protein S17e signature		transcript	taxon:13686	20060427	Prosite
Prosite	SI.CL.19.cl.1977.SiJWC02ABG.scf	SI.CL.19.cl.1977.SiJWC02ABG.scf		GO:0004713	Prosite:PS00109|Prosite:PDOC00100	IEA		P	Tyrosine protein kinases specific active-site signature		transcript	taxon:13686	20060427	Prosite
Prosite	SI.CL.19.cl.1977.SiJWC02ABG.scf	SI.CL.19.cl.1977.SiJWC02ABG.scf		GO:0005524	Prosite:PS00109|Prosite:PDOC00100	IEA		P	Tyrosine protein kinases specific active-site signature		transcript	taxon:13686	20060427	Prosite
Prosite	SI.CL.19.cl.1977.SiJWC02ABG.scf	SI.CL.19.cl.1977.SiJWC02ABG.scf		GO:0006468	Prosite:PS00109|Prosite:PDOC00100	IEA		P	Tyrosine protein kinases specific active-site signature		transcript	taxon:13686	20060427	Prosite
Prosite	SI.CL.19.cl.1977.SiJWB12AAE.tag5_B12_04.scf	SI.CL.19.cl.1977.SiJWB12AAE.tag5_B12_04.scf		GO:0004713	Prosite:PS00109|Prosite:PDOC00100	IEA		P	Tyrosine protein kinases specific active-site signature		transcript	taxon:13686	20060427	Prosite
Prosite	SI.CL.19.cl.1977.SiJWB12AAE.tag5_B12_04.scf	SI.CL.19.cl.1977.SiJWB12AAE.tag5_B12_04.scf		GO:0005524	Prosite:PS00109|Prosite:PDOC00100	IEA		P	Tyrosine protein kinases specific active-site signature		transcript	taxon:13686	20060427	Prosite
Prosite	SI.CL.19.cl.1977.SiJWB12AAE.tag5_B12_04.scf	SI.CL.19.cl.1977.SiJWB12AAE.tag5_B12_04.scf		GO:0006468	Prosite:PS00109|Prosite:PDOC00100	IEA		P	Tyrosine protein kinases specific active-site signature		transcript	taxon:13686	20060427	Prosite
Prosite	SI.CL.20.cl.2051.SiJWG02ADC.scf	SI.CL.20.cl.2051.SiJWG02ADC.scf		GO:0005524	Prosite:PS00674|Prosite:PDOC00572	IEA		P	AAA-protein family signature		transcript	taxon:13686	20060427	Prosite
Prosite	SI.CL.24.cl.2460.SiJWD09BCU2.scf	SI.CL.24.cl.2460.SiJWD09BCU2.scf		GO:0004497	Prosite:PS00086|Prosite:PDOC00081	IEA		P	Cytochrome P450 cysteine heme-iron ligand signature		transcript	taxon:13686	20060427	Prosite
Prosite	SI.CL.24.cl.2460.SiJWD09BCU2.scf	SI.CL.24.cl.2460.SiJWD09BCU2.scf		GO:0005506	Prosite:PS00086|Prosite:PDOC00081	IEA		P	Cytochrome P450 cysteine heme-iron ligand signature		transcript	taxon:13686	20060427	Prosite
Prosite	SI.CL.24.cl.2460.SiJWD09BCU2.scf	SI.CL.24.cl.2460.SiJWD09BCU2.scf		GO:0020037	Prosite:PS00086|Prosite:PDOC00081	IEA		P	Cytochrome P450 cysteine heme-iron ligand signature		transcript	taxon:13686	20060427	Prosite
Prosite	SI.CL.24.cl.2460.SiJWD09BCU2.scf	SI.CL.24.cl.2460.SiJWD09BCU2.scf		GO:0006118	Prosite:PS00086|Prosite:PDOC00081	IEA		P	Cytochrome P450 cysteine heme-iron ligand signature		transcript	taxon:13686	20060427	Prosite
Prosite	SI.CL.25.cl.2504.SiJWE06ACY.scf	SI.CL.25.cl.2504.SiJWE06ACY.scf		GO:0004674	Prosite:PS00108|Prosite:PDOC00100	IEA		P	Serine/Threonine protein kinases active-site signature		transcript	taxon:13686	20060427	Prosite
Prosite	SI.CL.25.cl.2504.SiJWE06ACY.scf	SI.CL.25.cl.2504.SiJWE06ACY.scf		GO:0006468	Prosite:PS00108|Prosite:PDOC00100	IEA		P	Serine/Threonine protein kinases active-site signature		transcript	taxon:13686	20060427	Prosite
Prosite	SI.CL.28.cl.2831.SiJWA11BBV2.scf	SI.CL.28.cl.2831.SiJWA11BBV2.scf		GO:0004497	Prosite:PS00086|Prosite:PDOC00081	IEA		P	Cytochrome P450 cysteine heme-iron ligand signature		transcript	taxon:13686	20060427	Prosite
Prosite	SI.CL.28.cl.2831.SiJWA11BBV2.scf	SI.CL.28.cl.2831.SiJWA11BBV2.scf		GO:0005506	Prosite:PS00086|Prosite:PDOC00081	IEA		P	Cytochrome P450 cysteine heme-iron ligand signature		transcript	taxon:13686	20060427	Prosite
Prosite	SI.CL.28.cl.2831.SiJWA11BBV2.scf	SI.CL.28.cl.2831.SiJWA11BBV2.scf		GO:0020037	Prosite:PS00086|Prosite:PDOC00081	IEA		P	Cytochrome P450 cysteine heme-iron ligand signature		transcript	taxon:13686	20060427	Prosite
Prosite	SI.CL.28.cl.2831.SiJWA11BBV2.scf	SI.CL.28.cl.2831.SiJWA11BBV2.scf		GO:0006118	Prosite:PS00086|Prosite:PDOC00081	IEA		P	Cytochrome P450 cysteine heme-iron ligand signature		transcript	taxon:13686	20060427	Prosite
Prosite	SI.CL.31.cl.3182.SiJWD03BBU.scf	SI.CL.31.cl.3182.SiJWD03BBU.scf		GO:0004221	Prosite:PS00140|Prosite:PDOC00127	IEA		P	Ubiquitin carboxyl-terminal hydrolase family 1 cysteine active-site		transcript	taxon:13686	20060427	Prosite
Prosite	SI.CL.31.cl.3182.SiJWD03BBU.scf	SI.CL.31.cl.3182.SiJWD03BBU.scf		GO:0006511	Prosite:PS00140|Prosite:PDOC00127	IEA		P	Ubiquitin carboxyl-terminal hydrolase family 1 cysteine active-site		transcript	taxon:13686	20060427	Prosite
Prosite	SI.CL.31.cl.3182.SiJWD03BBU.scf	SI.CL.31.cl.3182.SiJWD03BBU.scf		GO:0005622	Prosite:PS00140|Prosite:PDOC00127	IEA		P	Ubiquitin carboxyl-terminal hydrolase family 1 cysteine active-site		transcript	taxon:13686	20060427	Prosite
Prosite	SI.CL.31.cl.3185.SiJWC08BBM2.scf	SI.CL.31.cl.3185.SiJWC08BBM2.scf		GO:0006464	Prosite:PS00299|Prosite:PDOC00271	IEA		P	Ubiquitin domain signature		transcript	taxon:13686	20060427	Prosite
Prosite	SI.CL.31.cl.3185.SiJWF04BBV2.scf	SI.CL.31.cl.3185.SiJWF04BBV2.scf		GO:0006464	Prosite:PS00299|Prosite:PDOC00271	IEA		P	Ubiquitin domain signature		transcript	taxon:13686	20060427	Prosite
Prosite	SI.CL.35.cl.3549.SiJWF06CAM.scf	SI.CL.35.cl.3549.SiJWF06CAM.scf		GO:0004365	Prosite:PS00071|Prosite:PDOC00069	IEA		P	Glyceraldehyde 3-phosphate dehydrogenase active site		transcript	taxon:13686	20060427	Prosite
Prosite	SI.CL.35.cl.3549.SiJWF06CAM.scf	SI.CL.35.cl.3549.SiJWF06CAM.scf		GO:0051287	Prosite:PS00071|Prosite:PDOC00069	IEA		P	Glyceraldehyde 3-phosphate dehydrogenase active site		transcript	taxon:13686	20060427	Prosite
Prosite	SI.CL.35.cl.3549.SiJWF06CAM.scf	SI.CL.35.cl.3549.SiJWF06CAM.scf		GO:0006096	Prosite:PS00071|Prosite:PDOC00069	IEA		P	Glyceraldehyde 3-phosphate dehydrogenase active site		transcript	taxon:13686	20060427	Prosite
