# Supplementary material for: An annotated cDNA library and microarray for large-scale gene-expression studies in the ant Solenopsis invicta
Source: Genome Biol. 2007 Jan 15;8(1):R9. doi: 10.1186/gb-2007-8-1-r9 (PMC1839134; doi:10.1186/gb-2007-8-1-r9)
Supplement: Additional data file 6 — Fire ant assembled sequences similar to D. melanogaster genes with the GO term 'behavior' [file gb-2007-8-1-r9-S6.xls]

## Sheet: dmel_go_beh_homologs
Additional data file 6: Fire ant assembled sequences similar to D. melanogaster genes annotated with behavior in any GO term.
There are 108 fire ant assembled sequences that match 81 unique Drosophila melanogaster genes
Fire ant assembled sequence	Gene name	E-value	Drosophila polypeptide ID
SI.CL.5.cl.511.Contig1	ATPsyn-beta-PA	1e-147	CG11154-PA
SiJWA03AAE.tag5_A03_01.scf	CG10724-PB	1e-125	CG10724-PB
SI.CL.34.cl.3440.Contig1	Abl-PA	1e-116	CG4032-PA
SI.CL.41.cl.4169.Contig1	drk-PB	1e-108	CG6033-PB
SI.CL.13.cl.1367.Contig1	CkIIbeta-PA	1e-104	CG15224-PA
SI.CL.0.cl.078.Contig1	Hsp83-PA	6e-97	CG1242-PA
SiJWG05CAC2.scf	tun-PE	9e-95	CG30084-PE
SI.CL.4.cl.457.Contig1	Gdh-PE	8e-93	CG5320-PE
SiJWD08BAP.scf	shot-PB	1e-88	CG18076-PB
SI.CL.12.cl.1279.Contig1	Vha55-PB	1e-87	CG17369-PB
SI.CL.6.cl.653.Contig1	bt-PE	1e-85	CG32019-PE
SI.CL.28.cl.2857.Contig1	Cdc42-PB	4e-85	CG12530-PB
SI.CL.27.cl.2793.Contig1	Ras85D-PA	4e-81	CG9375-PA
SiJWH07BBM2.scf	Ced-12-PA	7e-80	CG5336-PA
SiJWG03ACG.scf	betaTub56D-PB	2e-79	CG9277-PB
SI.CL.26.cl.2682.Contig1	sqh-PA	8e-79	CG3595-PA
SI.CL.25.cl.2532.Contig1	Rho1-PE	3e-74	CG8416-PE
SI.CL.33.cl.3317.Contig1	loj-PB	6e-74	CG10733-PB
SI.CL.13.cl.1344.SiJWC08BDJ.scf	crl-PA	1e-73	CG4443-PA
SI.CL.13.cl.1344.Contig1	crl-PA	5e-73	CG4443-PA
SI.CL.31.cl.3117.Contig1	tsr-PA	3e-72	CG4254-PA
SI.CL.4.cl.492.Contig1	awd-PA	1e-70	CG2210-PA
SI.CL.8.cl.878.Contig1	eIF-5C-PB	2e-68	CG2922-PB
SI.CL.2.cl.258.Contig1	TpnC73F-PA	5e-68	CG7930-PA
SiJWE02ABO.scf	Pka-R1-PG	4e-66	CG3263-PG
SiJWH01ACM.scf	slmo-PA	2e-65	CG9131-PA
SI.CL.9.cl.919.Contig1	betaTub56D-PB	9e-65	CG9277-PB
SiJWF08BAQ.scf	Vinc-PA	3e-60	CG3299-PA
SiJWG07BCO2.scf	Arc-p20-PA	5e-59	CG5972-PA
SiJWC12ABF.scf	sqd-PA	6e-59	CG16901-PA
SI.CL.15.cl.1563.Contig1	14-3-3epsilon-PD	1e-58	CG31196-PD
SI.CL.26.cl.2604.Contig1	lola-PS	3e-57	CG12052-PS
SI.CL.12.cl.1252.Contig1	Pax-PF	2e-56	CG31794-PF
SiJWG10ADB.scf	Pvr-PA	3e-56	CG8222-PA
SI.CL.12.cl.1285.Contig1	betaTub60D-PA	6e-55	CG3401-PA
SI.CL.6.cl.643.Contig1	Hmgcr-PB	2e-52	CG10367-PB
SI.CL.29.cl.2999.Contig1	p16-ARC-PA	8e-52	CG9881-PA
SiJWE08BAJ.scf	twf-PA	7e-50	CG3172-PA
SI.CL.4.cl.492.Contig2	awd-PA	3e-48	CG2210-PA
SI.CL.3.cl.390.Contig1	eIF-5C-PB	3e-44	CG2922-PB
SiJWE02ADO.scf	eas-PB	3e-44	CG3525-PB
SiJWE06ACV.scf	beta4GalNAcTA-PA	8e-44	CG8536-PA
SiJWD09ABM.scf	gammaTub23C-PA	6e-43	CG3157-PA
SiJWB06ABV.scf	Pka-C1-PB	2e-42	CG4379-PB
SI.CL.11.cl.1166.SiJWG04ADU.scf	robl-PA	1e-41	CG10751-PA
SI.CL.11.cl.1166.SiJWG07BBE.scf	robl-PA	1e-41	CG10751-PA
SI.CL.11.cl.1166.SiJWF02CAT2.scf	robl-PA	2e-41	CG10751-PA
SiJWD12ADC.scf	alphaTub84D-PA	2e-41	CG2512-PA
SI.CL.11.cl.1166.Contig2	robl-PA	2e-41	CG10751-PA
SI.CL.11.cl.1166.Contig1	robl-PA	2e-41	CG10751-PA
SI.CL.11.cl.1166.SiJWB11ACH.scf	robl-PA	1e-40	CG10751-PA
SI.CL.11.cl.1166.SiJWC07BDI2.scf	robl-PA	2e-40	CG10751-PA
SI.CL.42.cl.4217.Contig1	klg-PA	2e-40	CG6669-PA
SiJWH05AEA.scf	dco-PC	4e-40	CG2048-PC
SI.CL.17.cl.1743.Contig1	aay-PA	3e-39	CG3705-PA
SiJWB04BCC.tag5_B04_04.scf	Lar-PA	1e-38	CG10443-PA
SiJWH04ABK.scf	sesB-PA	2e-38	CG16944-PA
SiJWA04BDS2.scf	e-PA	7e-38	CG3331-PA
SI.CL.24.cl.2496.Contig1	sbr-PA	5e-37	CG1664-PA
SiJWF06ADX.scf	Gad1-PB	6e-37	CG14994-PB
SI.CL.40.cl.4022.Contig1	Dscam-PB	6e-37	CG17800-PB
SI.CL.27.cl.2741.Contig1	syt-PD	4e-36	CG3139-PD
SiJWG08BAP.scf	Ptp52F-PA	1e-35	CG18243-PA
SiJWC05ACO.scf	Gas8-PB	9e-35	CG14271-PB
SiJWH08CAV.scf	bt-PE	1e-34	CG32019-PE
SI.CL.21.cl.2105.Contig1	TpnC25D-PA	9e-34	CG6514-PA
SiJWB01BCB2.scf	rok-PA	1e-33	CG9774-PA
SI.CL.19.cl.1905.Contig1	Tsp74F-PA	5e-30	CG5492-PA
SiJWG03BAC.scf	stck-PA	5e-30	CG7954-PA
SI.CL.8.cl.865.Contig1	Egfr-PB	7e-30	CG10079-PB
SI.CL.23.cl.2317.Contig1	alphaTub84D-PA	4e-28	CG2512-PA
SiJWA02AAP.scf	Tsp74F-PA	3e-27	CG5492-PA
SI.CL.0.cl.091.Contig1	LanA-PA	4e-27	CG10236-PA
SiJWB09ADK.scf	CG3599-PA	6e-25	CG3599-PA
SiJWG01ADR.scf	mnb-PC	1e-24	CG7826-PC
SI.CL.4.cl.440.Contig1	Tsp74F-PA	2e-24	CG5492-PA
SiJWH06BDP.scf	tko-PB	2e-24	CG7925-PB
SiJWE09BCU2.scf	bt-PE	3e-22	CG32019-PE
SI.CL.25.cl.2558.Contig1	ATPsyn-beta-PA	4e-21	CG11154-PA
SiJWB08BBS.scf	alphaTub84D-PA	3e-17	CG2512-PA
SI.CL.42.cl.4217.SiJWB52C03_pcr1_tag5_E02_10.scf	klg-PA	8e-16	CG6669-PA
SI.CL.3.cl.321.Contig2	Gad1-PB	3e-15	CG14994-PB
SI.CL.42.cl.4217.SiJWB52C04_pcr1_tag5_F02_12.scf	klg-PA	1e-14	CG6669-PA
SI.CL.39.cl.3947.Contig1	dock-PB	1e-13	CG3727-PB
SiJWF02BDZ.scf	Hk-PA	1e-13	CG32688-PA
SiJWA07AAS.scf	ninA-PA	1e-12	CG6449-PA
SiJWC07ACO.scf	lola-PB	1e-12	CG12052-PB
SI.CL.20.cl.2042.Contig1	tun-PE	1e-12	CG30084-PE
SiJWB10ADI.scf	lola-PB	2e-12	CG12052-PB
SI.CL.1.cl.185.Contig1	sli-PC	6e-12	CG8355-PC
SiJWB11ABH.scf	for-PG	1e-11	CG10033-PG
SiJWB03ACL.scf	CadN-PH	2e-11	CG7100-PH
SI.CL.10.cl.1053.Contig1	lola-PU	4e-10	CG12052-PU
SI.CL.4.cl.485.Contig3	spen-PA	1e-09	CG18497-PA
SI.CL.24.cl.2486.Contig1	slbo-PA	2e-09	CG4354-PA
SiJWF03BDD2.scf	Mhcl-PE	3e-09	CG31045-PE
SiJWE03CAX.scf	vanin-like-PA	2e-08	CG32754-PA
SiJWF04BBP.scf	gish-PE	8e-08	CG6963-PE
SiJWD03ACB.scf	Ddc-PA	1e-07	CG10697-PA
SiJWB02ABH.scf	MICAL-PC	1e-07	CG33208-PC
SI.CL.34.cl.3448.Contig1	sbr-PA	2e-07	CG1664-PA
SI.CL.31.cl.3175.Contig1	BicC-PD	2e-07	CG4824-PD
SI.CL.12.cl.1287.SiJWH09BBY.scf	th-PC	3e-07	CG12284-PC
SiJWB07BBZ.scf	zip-PD	4e-07	CG15792-PD
SI.CL.28.cl.2854.Contig1	Egfr-PB	6e-07	CG10079-PB
SI.CL.30.cl.3038.Contig1	Sema-5c-PA	9e-07	CG5661-PA
SI.CL.25.cl.2515.Contig1	Dhc36C-PA	2e-06	CG5526-PA
SiJWC09ACE.scf	lola-PU	5e-06	CG12052-PU
