# Supplementary material for: An annotated cDNA library and microarray for large-scale gene-expression studies in the ant Solenopsis invicta
Source: Genome Biol. 2007 Jan 15;8(1):R9. doi: 10.1186/gb-2007-8-1-r9 (PMC1839134; doi:10.1186/gb-2007-8-1-r9)
Supplement: Additional data file 7 — Annotated list of the most abundant transcripts [file gb-2007-8-1-r9-S7.xls]

## Sheet: most_num_contigs_anno_1.txt
Additional data file 7: Fire ant contigs derived from more than 10 independent ESTs.
Fire Ant Contig Name	Number of ESTs	ID of Best Blastx Hit	Hit Description [Organism with Best Hit]	E-value	Identity (%)
SI.CL.0.cl.071.Contig1	48	ENSDARP00000052130	Conserved protein of unknown function [Danio rerio]	2e-17	79.2
SI.CL.4.cl.464.Contig2	39	Q6PWE1	Cytochrome b [Formica lugubris]	1e-113	60.1124
SI.CL.1.cl.121.Contig2	38	P29875	Cytochrome c oxidase subunit 2 [Lasius sp]	2e-57	55.3922
SI.CL.0.cl.037.Contig1	33	Q6IT30	Weak hit to NADH dehydrogenase subunit 3 [Philaenus spumarius]	8e-05	76.9231
SI.CL.0.cl.051.Contig1	26	no hit	Putative 16S rRNA, mitochondrial (according to Blastn)	na	na
SI.CL.1.cl.175.Contig2	24	Q5JCK9	NADH dehydrogenase subunit 2 [Aedes albopictus]	1e-07	30.9091
SI.CL.0.cl.005.Contig1	17	ENSAPMP00000034158	Putative chymotrypsin [Apis mellifera]	7e-51	43.913
SI.CL.4.cl.485.Contig3	17	Q5CEG7	Senescence-associated protein [Cryptosporidium hominis]	3e-34	70.1923
SI.CL.7.cl.734.Contig1	16	O61334	Elongation factor-1alpha F2 [Apis mellifera]	1e-112	97.1154
SI.CL.0.cl.065.Contig5	15	ENSCBRP00000009337	Hypothetical protein [Caenorhabditis briggsae]	1e-23	43.3628
SI.CL.1.cl.159.Contig1	15	Q7YXM2	Putative thioredoxin perxidase [Apis mellifera ligustica]	1e-82	87.5
SI.CL.17.cl.1723.Contig1	15	ENSAPMP00000012354	Putative 60S ribosomal protein L24 [Apis mellifera]	1e-51	69.5364
SI.CL.8.cl.847.Contig1	15	Q29CT8	Putative NADH dehydrogenase 1 alpha subcomplex 4 [Drosophila pseudoobscura]	8e-23	61.7284
SI.CL.0.cl.052.Contig1	14	Q964Q9	MRNA cap-binding protein eIF4E [Spodoptera frugiperda]	1e-71	61.3527
SI.CL.1.cl.194.Contig3	14	ENSAPMP00000015055	Putative ribosomal protein Ubq/L40e [Apis mellifera]	3e-64	100
SI.CL.11.cl.1121.Contig1	14	Q71U45	Cytochrome c oxidase VIIc [Homo sapiens]	6e-11	55.5556
SI.CL.6.cl.610.Contig1	14	Q8QY61	Polyprotein [Sacbrood virus]	2e-11	26.5116
SI.CL.7.cl.796.Contig1	14	ENSAPMP00000002127	Putative ribosomal protein L36 [Apis mellifera]	3e-53	90.3509
SI.CL.1.cl.195.Contig1	13	Q3LW33	Weak hit to hypothetical protein [Chlorarachnion sp]	2.5	26.2136
SI.CL.15.cl.1507.Contig1	13	ENSAPMP00000035247	Similar to boca [Apis mellifera]	4e-27	48.855
SI.CL.16.cl.1664.Contig1	13	ENSAPMP00000000231	Putative ribosomal protein L26 [Apis mellifera]	2e-51	75
SI.CL.2.cl.276.Contig1	13	SINFRUP00000147381	Weak hit to hypothetical protein [Takifugu rubripes]	0.002	25.7426
SI.CL.2.cl.287.Contig1	13	Q9V754	CG10153-PA unknown protein [Drosophila melanogaster]	3e-75	70.8333
SI.CL.4.cl.493.Contig1	13	Q4PP87	3-hydroxyacyl-CoA dehydrogenase [Lysiphlebus testaceipes]	1e-101	74.902
SI.CL.5.cl.569.Contig1	13	Q29MZ9	GA11014-PA (Fragment) [Drosophila pseudoobscura]	1e-14	40.8163
SI.CL.5.cl.592.Contig2	13	Q4DNK9	Weak hit to hypothetical protein [Trypanosoma cruzi]	4.5	32.6531
SI.CL.0.cl.016.Contig1	12	ENSAPMP00000024841	Putative Replication factor C (Activator 1) 3 [Apis mellifera]	1e-146	78.3133
SI.CL.1.cl.165.Contig2	12	ENSAPMP00000012348	Putative mitochondrial thioredoxin 2 [Apis mellifera]	2e-57	78.4173
SI.CL.13.cl.1316.Contig1	12	ENSAPMP00000010338	Putative mitochondrial ATP synthase O subunit [Apis mellifera]	2e-70	65.0246
SI.CL.2.cl.230.Contig1	12	ENSAPMP00000018003	Similar to enhancer of rudimentary [Apis mellifera]	2e-19	45.3608
SI.CL.2.cl.237.Contig1	12	Q23AX3	Weak hit to chlamydial polymorphic outer membrane protein repeat containing protein [Tetrahymena thermophila SB210]	0.56	27.6786
SI.CL.3.cl.337.Contig1	12	ENSAPMP00000001195	Putative ribosomal protein L15 [Apis mellifera]	1e-89	82.8431
SI.CL.5.cl.508.Contig1	12	ENSAPMP00000013220	Putative chymotrypsinogen [Apis mellifera]	3e-40	38.6957
SI.CL.8.cl.853.Contig1	12	ENSAPMP00000005757	Putative cytochrome c [Apis mellifera]	7e-53	86.1111
SI.CL.9.cl.938.Contig1	12	Q9VKE6	CG14934-PA [Drosophila melanogaster]	1e-140	51.4644
SI.CL.9.cl.985.Contig1	12	Q7RP30	Weak hit to hypothetical protein [Plasmodium yoelii yoelii]	2.4	29.5455
SI.CL.0.cl.038.Contig1	11	Q7Z161	Ferritin [Leptinotarsa decemlineata]	2e-52	51.1521
SI.CL.0.cl.041.Contig1	11	Q85H57	Cytochrome c oxidase subunit I (Fragment) [Myrmica ruginodis]	1e-175	66.7373
SI.CL.10.cl.1001.Contig2	11	ENSAPMP00000016467	Putative translation initiation factor 4A [Apis mellifera]	0	92.176
SI.CL.11.cl.1190.Contig1	11	ENSAPMP00000029078	Putative unknown protein [Apis mellifera]	1e-39	51.9737
SI.CL.12.cl.1246.Contig1	11	ENSAPMP00000024992	Putative Acyl-CoA-binding protein homolog (Diazepam-binding inhibitor homolog) [Apis mellifera]	3e-25	62.9213
SI.CL.13.cl.1304.Contig1	11	Q9NH75	Venom allergen 4 precursor [Solenopsis geminata]	3e-43	57.6642
SI.CL.2.cl.241.Contig1	11	Q7Q5H5	Chitin binding Peritrophin-A domain containing protein [Anopheles gambiae str]	1e-09	40.2597
SI.CL.4.cl.454.Contig1	11	ENSAPMP00000027689	Putative lectin 4 C-type lectin [Apis mellifera]	1e-40	88.2353
SI.CL.5.cl.510.Contig2	11	Q6PCI5	Weak hit to Mtmr3 protein [Xenopus laevis]	1	43.1373
SI.CL.5.cl.580.Contig1	11	Q4GX85	Ribosomal protein L39e [Biphyllus lunatus]	4e-21	100
SI.CL.5.cl.592.Contig4	11	ENSAPMP00000014490	Weak hit to putative unknown protein [Apis mellifera]	0.001	28.972
SI.CL.6.cl.625.Contig1	11	Q5AJE2	Weak hit to hypothetical protein RNA1 [Candida albicans SC5314]	2.3	38.8889
SI.CL.7.cl.776.Contig2	11	Q4UJ03	Weak hit to hypothetical protein [Theileria annulata]	3.5	27.6119
SI.CL.8.cl.820.Contig1	11	ENSAPMP00000032435	Putativechymotrypsin [Apis mellifera]	2e-58	47.7099
SI.CL.8.cl.828.Contig1	11	Q6B863	Weak hit to cytochrome c oxidase polypeptide VIII [Ixodes pacificus]	1.2	36.5854
SI.CL.0.cl.031.Contig1	10	O88668	CREG1 protein precursor (Cellular repressor of E1A-stimulated genes 1) [Mus musculus]	6e-37	43.7838
SI.CL.0.cl.098.Contig1	10	Q56FH6	Ribosomal protein S7 [Lysiphlebus testaceipes]	3e-80	79.2746
SI.CL.1.cl.148.Contig1	10	Q7P4X3	Weak hit to GTP cyclohydrolase I [Fusobacterium nucleatum subsp]	5.5	22.7273
SI.CL.1.cl.182.Contig1	10	Q2VW29	Antennae-specific chemosensory protein [Solenopsis invicta]	5e-20	43.3962
SI.CL.10.cl.1023.Contig1	10	Q5EN85	Weak hit to oxidative stress protein [Aurelia aurita]	0.005	32.7586
SI.CL.12.cl.1201.Contig1	10	Q8E2N6	Weak hit to hypothetical protein gbs2086 [Streptococcus agalactiae serotype III]	3.5	30.5882
SI.CL.14.cl.1425.Contig1	10	Q4XME0	Weak hit to hypothetical protein (Fragment) [Plasmodium chabaudi]	0.94	27.5
SI.CL.14.cl.1484.Contig1	10	ENSAPMP00000034161	Weak hit to putative unknown protein [Apis mellifera]	0.038	56.25
SI.CL.18.cl.1828.Contig1	10	ENSAPMP00000019311	Putative ribosomal protein S13 [Apis mellifera]	1e-78	96.0265
SI.CL.2.cl.243.Contig1	10	Q4I318	Weak hit to hypothetical protein [Gibberella zeae]	3.5	23.9437
SI.CL.2.cl.271.Contig1	10	Q2F5V9	Signal sequence receptor beta subunit [Bombyx mori]	5e-59	66.4596
SI.CL.3.cl.331.Contig4	10	no hit	Putative 12S rRNA, mitochondrial (according to Blastn)	na	na
SI.CL.4.cl.468.Contig1	10	ENSAPMP00000004807	Putative ribosomal protein S29e [Apis mellifera]	2e-27	98.1818
SI.CL.6.cl.634.Contig1	10	ENSAPMP00000019417	Weak hit to putative unknown protein [Apis mellifera]	1.2	26.9663
SI.CL.8.cl.829.Contig1	10	Q28BN5	NADH dehydrogenase (Ubiquinone) 1 alpha subcomplex 5 [Xenopus tropicalis]	1e-32	56.1404
SI.CL.9.cl.927.Contig1	10	ENSAPMP00000031188	Similar to B-cell receptor-associated protein 31 [Apis mellifera]	2e-60	58.1897
