# Supplementary material for: An annotated cDNA library and microarray for large-scale gene-expression studies in the ant Solenopsis invicta
Source: Genome Biol. 2007 Jan 15;8(1):R9. doi: 10.1186/gb-2007-8-1-r9 (PMC1839134; doi:10.1186/gb-2007-8-1-r9)
Supplement: Additional data file 8 — PCR results for the cDNA clones deposited onto the microarray [file gb-2007-8-1-r9-S8.xls]

## Sheet: reformatted_qc_file
Additional data file 8: PCR results for Solenopsis invicta EST clones deposited onto the microarray
For ten plates two separate PCRs were performed and printed onto the microarray.
For these we report the presence or absence of a PCR band(s) only for the second, better PCR
Clone	Number of PCR bands on gel
SiJWA01AAA	1
SiJWA02AAA	1
SiJWA03AAA	1
SiJWA04AAA	1
SiJWA05AAA	2
SiJWA06AAA	1
SiJWA07AAA	1
SiJWA08AAA	1
SiJWA09AAA	1
SiJWA10AAA	2
SiJWA11AAA	1
SiJWA12AAA	1
SiJWB01AAA	1
SiJWB02AAA	1
SiJWB03AAA	2
SiJWB04AAA	2
SiJWB05AAA	1
SiJWB06AAA	1
SiJWB07AAA	0
SiJWB08AAA	3
SiJWB09AAA	1
SiJWB10AAA	1
SiJWB11AAA	2
SiJWB12AAA	1
SiJWC01AAA	1
SiJWC02AAA	1
SiJWC03AAA	1
SiJWC04AAA	3
SiJWC05AAA	1
SiJWC06AAA	1
SiJWC07AAA	1
SiJWC08AAA	1
SiJWC09AAA	1
SiJWC10AAA	1
SiJWC11AAA	2
SiJWC12AAA	1
SiJWD01AAA	2
SiJWD02AAA	2
SiJWD03AAA	0
SiJWD04AAA	2
SiJWD05AAA	1
SiJWD06AAA	1
SiJWD07AAA	1
SiJWD08AAA	1
SiJWD09AAA	1
SiJWD10AAA	1
SiJWD11AAA	1
SiJWD12AAA	1
SiJWE01AAA	1
SiJWE02AAA	1
SiJWE03AAA	1
SiJWE04AAA	1
SiJWE05AAA	1
SiJWE06AAA	1
SiJWE07AAA	1
SiJWE08AAA	1
SiJWE09AAA	1
SiJWE10AAA	2
SiJWE11AAA	1
SiJWE12AAA	1
SiJWF01AAA	1
SiJWF02AAA	1
SiJWF03AAA	1
SiJWF04AAA	1
SiJWF05AAA	2
SiJWF06AAA	1
SiJWF07AAA	2
SiJWF08AAA	1
SiJWF09AAA	1
SiJWF10AAA	1
SiJWF11AAA	0
SiJWF12AAA	1
SiJWG01AAA	0
SiJWG02AAA	1
SiJWG03AAA	1
SiJWG04AAA	1
SiJWG05AAA	1
SiJWG06AAA	1
SiJWG07AAA	0
SiJWG08AAA	1
SiJWG09AAA	1
SiJWG10AAA	1
SiJWG11AAA	1
SiJWG12AAA	1
SiJWH01AAA	1
SiJWH02AAA	1
SiJWH03AAA	1
SiJWH04AAA	1
SiJWH05AAA	1
SiJWH06AAA	1
SiJWH07AAA	1
SiJWH08AAA	1
SiJWH09AAA	1
SiJWH10AAA	1
SiJWH11AAA	1
SiJWH12AAA	1
SiJWA01AAB	1
SiJWA02AAB	1
SiJWA03AAB	1
SiJWA04AAB	1
SiJWA05AAB	1
SiJWA06AAB	2
SiJWA07AAB	1
SiJWA08AAB	1
SiJWA09AAB	1
SiJWA10AAB	1
SiJWA11AAB	1
SiJWA12AAB	1
SiJWB01AAB	1
SiJWB02AAB	1
SiJWB03AAB	1
SiJWB04AAB	1
SiJWB05AAB	1
SiJWB06AAB	1
SiJWB07AAB	3
SiJWB08AAB	1
SiJWB09AAB	1
SiJWB10AAB	1
SiJWB11AAB	0
SiJWB12AAB	1
SiJWC01AAB	3
SiJWC02AAB	3
SiJWC03AAB	1
SiJWC04AAB	1
SiJWC05AAB	1
SiJWC06AAB	1
SiJWC07AAB	1
SiJWC08AAB	1
SiJWC09AAB	1
SiJWC10AAB	1
SiJWC11AAB	3
SiJWC12AAB	1
SiJWD01AAB	1
SiJWD02AAB	1
SiJWD03AAB	1
SiJWD04AAB	1
SiJWD05AAB	1
SiJWD06AAB	1
SiJWD07AAB	1
SiJWD08AAB	2
SiJWD09AAB	1
SiJWD10AAB	1
SiJWD11AAB	1
SiJWD12AAB	1
SiJWE01AAB	1
SiJWE02AAB	1
SiJWE03AAB	3
SiJWE04AAB	1
SiJWE05AAB	1
SiJWE06AAB	1
SiJWE07AAB	1
SiJWE08AAB	1
SiJWE09AAB	0
SiJWE10AAB	1
SiJWE11AAB	1
SiJWE12AAB	1
SiJWF01AAB	1
SiJWF02AAB	1
SiJWF03AAB	1
SiJWF04AAB	1
SiJWF05AAB	1
SiJWF06AAB	3
SiJWF07AAB	1
SiJWF08AAB	1
SiJWF09AAB	1
SiJWF10AAB	1
SiJWF11AAB	1
SiJWF12AAB	1
SiJWG01AAB	1
SiJWG02AAB	1
SiJWG03AAB	2
SiJWG04AAB	1
SiJWG05AAB	1
SiJWG06AAB	1
SiJWG07AAB	1
SiJWG08AAB	1
SiJWG09AAB	1
SiJWG10AAB	1
SiJWG11AAB	2
SiJWG12AAB	1
SiJWH01AAB	1
SiJWH02AAB	1
SiJWH03AAB	3
SiJWH04AAB	1
SiJWH05AAB	1
SiJWH06AAB	1
SiJWH07AAB	1
SiJWH08AAB	0
SiJWH09AAB	2
SiJWH10AAB	2
SiJWH11AAB	1
SiJWH12AAB	1
SiJWA01AAC	1
SiJWA02AAC	1
SiJWA03AAC	1
SiJWA04AAC	1
SiJWA05AAC	1
SiJWA06AAC	1
SiJWA07AAC	1
SiJWA08AAC	1
SiJWA09AAC	1
SiJWA10AAC	1
SiJWA11AAC	1
SiJWA12AAC	1
SiJWB01AAC	1
SiJWB02AAC	1
SiJWB03AAC	1
SiJWB04AAC	0
SiJWB05AAC	2
SiJWB06AAC	3
SiJWB07AAC	1
SiJWB08AAC	1
SiJWB09AAC	1
SiJWB10AAC	1
SiJWB11AAC	1
SiJWB12AAC	1
SiJWC01AAC	1
SiJWC02AAC	1
SiJWC03AAC	1
SiJWC04AAC	1
SiJWC05AAC	1
SiJWC06AAC	2
SiJWC07AAC	1
SiJWC08AAC	1
SiJWC09AAC	1
SiJWC10AAC	3
SiJWC11AAC	1
SiJWC12AAC	2
SiJWD01AAC	1
SiJWD02AAC	1
SiJWD03AAC	0
SiJWD04AAC	1
SiJWD05AAC	2
SiJWD06AAC	1
SiJWD07AAC	1
SiJWD08AAC	1
SiJWD09AAC	2
SiJWD10AAC	1
SiJWD11AAC	1
SiJWD12AAC	2
SiJWE01AAC	1
SiJWE02AAC	1
SiJWE03AAC	1
SiJWE04AAC	1
SiJWE05AAC	1
SiJWE06AAC	2
SiJWE07AAC	1
SiJWE08AAC	1
SiJWE09AAC	1
SiJWE10AAC	1
SiJWE11AAC	1
SiJWE12AAC	2
SiJWF01AAC	1
SiJWF02AAC	1
SiJWF03AAC	1
SiJWF04AAC	1
SiJWF05AAC	1
SiJWF06AAC	1
SiJWF07AAC	2
SiJWF08AAC	1
SiJWF09AAC	1
SiJWF10AAC	1
SiJWF11AAC	1
SiJWF12AAC	1
SiJWG01AAC	0
SiJWG02AAC	1
SiJWG03AAC	1
SiJWG04AAC	1
SiJWG05AAC	1
SiJWG06AAC	1
SiJWG07AAC	1
SiJWG08AAC	1
SiJWG09AAC	1
SiJWG10AAC	3
SiJWG11AAC	1
SiJWG12AAC	1
SiJWH01AAC	1
SiJWH02AAC	3
SiJWH03AAC	1
SiJWH04AAC	1
SiJWH05AAC	1
SiJWH06AAC	1
SiJWH07AAC	0
SiJWH08AAC	1
SiJWH09AAC	3
SiJWH10AAC	1
SiJWH11AAC	1
SiJWH12AAC	2
SiJWA01AAD	1
SiJWA02AAD	1
SiJWA03AAD	1
SiJWA04AAD	1
SiJWA05AAD	1
SiJWA06AAD	1
SiJWA07AAD	1
SiJWA08AAD	2
SiJWA09AAD	1
SiJWA10AAD	1
SiJWA11AAD	1
SiJWA12AAD	1
SiJWB01AAD	1
SiJWB02AAD	1
SiJWB03AAD	1
SiJWB04AAD	1
SiJWB05AAD	1
SiJWB06AAD	1
SiJWB07AAD	1
SiJWB08AAD	2
SiJWB09AAD	1
SiJWB10AAD	2
SiJWB11AAD	1
SiJWB12AAD	1
SiJWC01AAD	1
SiJWC02AAD	2
SiJWC03AAD	1
SiJWC04AAD	1
SiJWC05AAD	0
SiJWC06AAD	1
SiJWC07AAD	1
SiJWC08AAD	1
SiJWC09AAD	2
SiJWC10AAD	1
SiJWC11AAD	1
SiJWC12AAD	1
SiJWD01AAD	1
SiJWD02AAD	1
SiJWD03AAD	1
SiJWD04AAD	1
SiJWD05AAD	1
SiJWD06AAD	2
SiJWD07AAD	1
SiJWD08AAD	1
SiJWD09AAD	1
SiJWD10AAD	1
SiJWD11AAD	1
SiJWD12AAD	1
SiJWE01AAD	1
SiJWE02AAD	2
SiJWE03AAD	1
SiJWE04AAD	1
SiJWE05AAD	1
SiJWE06AAD	1
SiJWE07AAD	1
SiJWE08AAD	1
SiJWE09AAD	1
SiJWE10AAD	1
SiJWE11AAD	1
SiJWE12AAD	1
SiJWF01AAD	1
SiJWF02AAD	2
SiJWF03AAD	1
SiJWF04AAD	1
SiJWF05AAD	1
SiJWF06AAD	1
SiJWF07AAD	1
SiJWF08AAD	1
SiJWF09AAD	2
SiJWF10AAD	1
SiJWF11AAD	1
SiJWF12AAD	1
SiJWG01AAD	0
SiJWG02AAD	1
SiJWG03AAD	1
SiJWG04AAD	1
SiJWG05AAD	1
SiJWG06AAD	1
SiJWG07AAD	1
SiJWG08AAD	1
SiJWG09AAD	2
SiJWG10AAD	1
SiJWG11AAD	2
SiJWG12AAD	1
SiJWH01AAD	1
SiJWH02AAD	1
SiJWH03AAD	1
SiJWH04AAD	1
SiJWH05AAD	1
SiJWH06AAD	1
SiJWH07AAD	1
SiJWH08AAD	1
SiJWH09AAD	1
SiJWH10AAD	1
SiJWH11AAD	1
SiJWH12AAD	1
SiJWA01AAE	1
SiJWA02AAE	1
SiJWA03AAE	1
SiJWA04AAE	1
SiJWA05AAE	1
SiJWA06AAE	1
SiJWA07AAE	1
SiJWA08AAE	1
SiJWA09AAE	1
SiJWA10AAE	1
SiJWA11AAE	1
SiJWA12AAE	1
SiJWB01AAE	1
SiJWB02AAE	1
SiJWB03AAE	1
SiJWB04AAE	1
SiJWB05AAE	1
SiJWB06AAE	0
SiJWB07AAE	1
SiJWB08AAE	1
SiJWB09AAE	1
SiJWB10AAE	1
SiJWB11AAE	1
SiJWB12AAE	1
SiJWC01AAE	1
SiJWC02AAE	1
SiJWC03AAE	1
SiJWC04AAE	1
SiJWC05AAE	1
SiJWC06AAE	1
SiJWC07AAE	2
SiJWC08AAE	1
SiJWC09AAE	3
SiJWC10AAE	1
SiJWC11AAE	1
SiJWC12AAE	1
SiJWD01AAE	1
SiJWD02AAE	1
SiJWD03AAE	2
SiJWD04AAE	1
SiJWD05AAE	1
SiJWD06AAE	1
SiJWD07AAE	1
SiJWD08AAE	1
SiJWD09AAE	0
SiJWD10AAE	1
SiJWD11AAE	1
SiJWD12AAE	2
SiJWE01AAE	1
SiJWE02AAE	1
SiJWE03AAE	1
SiJWE04AAE	1
SiJWE05AAE	1
SiJWE06AAE	1
SiJWE07AAE	1
SiJWE08AAE	4
SiJWE09AAE	1
SiJWE10AAE	1
SiJWE11AAE	1
SiJWE12AAE	2
SiJWF01AAE	1
SiJWF02AAE	2
SiJWF03AAE	1
SiJWF04AAE	2
SiJWF05AAE	2
SiJWF06AAE	1
SiJWF07AAE	1
SiJWF08AAE	2
SiJWF09AAE	1
SiJWF10AAE	2
SiJWF11AAE	1
SiJWF12AAE	1
SiJWG01AAE	2
SiJWG02AAE	2
SiJWG03AAE	1
SiJWG04AAE	1
SiJWG05AAE	1
SiJWG06AAE	1
SiJWG07AAE	1
SiJWG08AAE	1
SiJWG09AAE	0
SiJWG10AAE	1
SiJWG11AAE	1
SiJWG12AAE	1
SiJWH01AAE	2
SiJWH02AAE	1
SiJWH03AAE	1
SiJWH04AAE	1
SiJWH05AAE	3
SiJWH06AAE	1
SiJWH07AAE	1
SiJWH08AAE	1
SiJWH09AAE	1
SiJWH10AAE	1
SiJWH11AAE	1
SiJWH12AAE	1
SiJWA01AAF	1
SiJWA02AAF	1
SiJWA03AAF	1
SiJWA04AAF	1
SiJWA05AAF	3
SiJWA06AAF	1
SiJWA07AAF	3
SiJWA08AAF	1
SiJWA09AAF	2
SiJWA10AAF	2
SiJWA11AAF	2
SiJWA12AAF	1
SiJWB01AAF	1
SiJWB02AAF	1
SiJWB03AAF	1
SiJWB04AAF	1
SiJWB05AAF	1
SiJWB06AAF	1
SiJWB07AAF	1
SiJWB08AAF	1
SiJWB09AAF	1
SiJWB10AAF	2
SiJWB11AAF	1
SiJWB12AAF	1
SiJWC01AAF	1
SiJWC02AAF	1
SiJWC03AAF	1
SiJWC04AAF	1
SiJWC05AAF	1
SiJWC06AAF	1
SiJWC07AAF	1
SiJWC08AAF	1
SiJWC09AAF	1
SiJWC10AAF	1
SiJWC11AAF	3
SiJWC12AAF	1
SiJWD01AAF	1
SiJWD02AAF	1
SiJWD03AAF	1
SiJWD04AAF	1
SiJWD05AAF	2
SiJWD06AAF	2
SiJWD07AAF	1
SiJWD08AAF	1
SiJWD09AAF	3
SiJWD10AAF	1
SiJWD11AAF	1
SiJWD12AAF	1
SiJWE01AAF	1
SiJWE02AAF	1
SiJWE03AAF	1
SiJWE04AAF	2
SiJWE05AAF	1
SiJWE06AAF	1
SiJWE07AAF	1
SiJWE08AAF	1
SiJWE09AAF	1
SiJWE10AAF	2
SiJWE11AAF	1
SiJWE12AAF	1
SiJWF01AAF	2
SiJWF02AAF	2
SiJWF03AAF	2
SiJWF04AAF	1
SiJWF05AAF	1
SiJWF06AAF	1
SiJWF07AAF	1
SiJWF08AAF	1
SiJWF09AAF	1
SiJWF10AAF	2
SiJWF11AAF	4
SiJWF12AAF	1
SiJWG01AAF	1
SiJWG02AAF	1
SiJWG03AAF	1
SiJWG04AAF	1
SiJWG05AAF	2
SiJWG06AAF	1
SiJWG07AAF	2
SiJWG08AAF	1
SiJWG09AAF	1
SiJWG10AAF	1
SiJWG11AAF	1
SiJWG12AAF	2
SiJWH01AAF	1
SiJWH02AAF	1
SiJWH03AAF	0
SiJWH04AAF	1
SiJWH05AAF	1
SiJWH06AAF	1
SiJWH07AAF	1
SiJWH08AAF	1
SiJWH09AAF	1
SiJWH10AAF	1
SiJWH11AAF	1
SiJWH12AAF	2
SiJWA01AAG	1
SiJWA02AAG	1
SiJWA03AAG	1
SiJWA04AAG	1
SiJWA05AAG	1
SiJWA06AAG	1
SiJWA07AAG	1
SiJWA08AAG	1
SiJWA09AAG	2
SiJWA10AAG	1
SiJWA11AAG	0
SiJWA12AAG	2
SiJWB01AAG	0
SiJWB02AAG	1
SiJWB03AAG	1
SiJWB04AAG	1
SiJWB05AAG	1
SiJWB06AAG	1
SiJWB07AAG	2
SiJWB08AAG	1
SiJWB09AAG	2
SiJWB10AAG	1
SiJWB11AAG	1
SiJWB12AAG	1
SiJWC01AAG	1
SiJWC02AAG	1
SiJWC03AAG	1
SiJWC04AAG	1
SiJWC05AAG	1
SiJWC06AAG	1
SiJWC07AAG	1
SiJWC08AAG	1
SiJWC09AAG	2
SiJWC10AAG	1
SiJWC11AAG	1
SiJWC12AAG	1
SiJWD01AAG	1
SiJWD02AAG	1
SiJWD03AAG	1
SiJWD04AAG	1
SiJWD05AAG	1
SiJWD06AAG	1
SiJWD07AAG	1
SiJWD08AAG	1
SiJWD09AAG	0
SiJWD10AAG	1
SiJWD11AAG	1
SiJWD12AAG	1
SiJWE01AAG	1
SiJWE02AAG	1
SiJWE03AAG	1
SiJWE04AAG	1
SiJWE05AAG	1
SiJWE06AAG	1
SiJWE07AAG	1
SiJWE08AAG	3
SiJWE09AAG	2
SiJWE10AAG	0
SiJWE11AAG	0
SiJWE12AAG	1
SiJWF01AAG	1
SiJWF02AAG	1
SiJWF03AAG	1
SiJWF04AAG	3
SiJWF05AAG	1
SiJWF06AAG	1
SiJWF07AAG	1
SiJWF08AAG	2
SiJWF09AAG	3
SiJWF10AAG	1
SiJWF11AAG	1
SiJWF12AAG	1
SiJWG01AAG	3
SiJWG02AAG	1
SiJWG03AAG	1
SiJWG04AAG	1
SiJWG05AAG	1
SiJWG06AAG	1
SiJWG07AAG	1
SiJWG08AAG	1
SiJWG09AAG	1
SiJWG10AAG	1
SiJWG11AAG	1
SiJWG12AAG	1
SiJWH01AAG	1
SiJWH02AAG	0
SiJWH03AAG	1
SiJWH04AAG	2
SiJWH05AAG	1
SiJWH06AAG	1
SiJWH07AAG	2
SiJWH08AAG	2
SiJWH09AAG	2
SiJWH10AAG	1
SiJWH11AAG	1
SiJWH12AAG	2
SiJWA01AAH	1
SiJWA02AAH	1
SiJWA03AAH	1
SiJWA04AAH	1
SiJWA05AAH	1
SiJWA06AAH	1
SiJWA07AAH	1
SiJWA08AAH	1
SiJWA09AAH	1
SiJWA10AAH	1
SiJWA11AAH	1
SiJWA12AAH	1
SiJWB01AAH	1
SiJWB02AAH	1
SiJWB03AAH	1
SiJWB04AAH	1
SiJWB05AAH	1
SiJWB06AAH	2
SiJWB07AAH	1
SiJWB08AAH	2
SiJWB09AAH	0
SiJWB10AAH	1
SiJWB11AAH	1
SiJWB12AAH	1
SiJWC01AAH	2
SiJWC02AAH	1
SiJWC03AAH	1
SiJWC04AAH	2
SiJWC05AAH	1
SiJWC06AAH	1
SiJWC07AAH	2
SiJWC08AAH	2
SiJWC09AAH	3
SiJWC10AAH	1
SiJWC11AAH	1
SiJWC12AAH	2
SiJWD01AAH	1
SiJWD02AAH	1
SiJWD03AAH	1
SiJWD04AAH	1
SiJWD05AAH	1
SiJWD06AAH	1
SiJWD07AAH	1
SiJWD08AAH	1
SiJWD09AAH	1
SiJWD10AAH	3
SiJWD11AAH	1
SiJWD12AAH	1
SiJWE01AAH	1
SiJWE02AAH	1
SiJWE03AAH	1
SiJWE04AAH	1
SiJWE05AAH	1
SiJWE06AAH	1
SiJWE07AAH	2
SiJWE08AAH	1
SiJWE09AAH	1
SiJWE10AAH	1
SiJWE11AAH	1
SiJWE12AAH	1
SiJWF01AAH	1
SiJWF02AAH	1
SiJWF03AAH	1
SiJWF04AAH	2
SiJWF05AAH	1
SiJWF06AAH	1
SiJWF07AAH	1
SiJWF08AAH	1
SiJWF09AAH	1
SiJWF10AAH	2
SiJWF11AAH	1
SiJWF12AAH	1
SiJWG01AAH	4
SiJWG02AAH	1
SiJWG03AAH	2
SiJWG04AAH	1
SiJWG05AAH	2
SiJWG06AAH	2
SiJWG07AAH	1
SiJWG08AAH	1
SiJWG09AAH	0
SiJWG10AAH	1
SiJWG11AAH	1
SiJWG12AAH	0
SiJWH01AAH	3
SiJWH02AAH	1
SiJWH03AAH	1
SiJWH04AAH	1
SiJWH05AAH	2
SiJWH06AAH	1
SiJWH07AAH	1
SiJWH08AAH	2
SiJWH09AAH	2
SiJWH10AAH	3
SiJWH11AAH	1
SiJWH12AAH	1
SiJWA01AAI	1
SiJWA02AAI	1
SiJWA03AAI	1
SiJWA04AAI	1
SiJWA05AAI	1
SiJWA06AAI	1
SiJWA07AAI	1
SiJWA08AAI	1
SiJWA09AAI	1
SiJWA10AAI	1
SiJWA11AAI	1
SiJWA12AAI	1
SiJWB01AAI	1
SiJWB02AAI	1
SiJWB03AAI	1
SiJWB04AAI	1
SiJWB05AAI	1
SiJWB06AAI	1
SiJWB07AAI	1
SiJWB08AAI	1
SiJWB09AAI	1
SiJWB10AAI	2
SiJWB11AAI	1
SiJWB12AAI	1
SiJWC01AAI	1
SiJWC02AAI	1
SiJWC03AAI	1
SiJWC04AAI	1
SiJWC05AAI	2
SiJWC06AAI	1
SiJWC07AAI	1
SiJWC08AAI	2
SiJWC09AAI	1
SiJWC10AAI	3
SiJWC11AAI	0
SiJWC12AAI	1
SiJWD01AAI	1
SiJWD02AAI	4
SiJWD03AAI	1
SiJWD04AAI	1
SiJWD05AAI	1
SiJWD06AAI	1
SiJWD07AAI	1
SiJWD08AAI	1
SiJWD09AAI	1
SiJWD10AAI	1
SiJWD11AAI	1
SiJWD12AAI	1
SiJWE01AAI	1
SiJWE02AAI	1
SiJWE03AAI	3
SiJWE04AAI	1
SiJWE05AAI	1
SiJWE06AAI	1
SiJWE07AAI	1
SiJWE08AAI	1
SiJWE09AAI	1
SiJWE10AAI	1
SiJWE11AAI	1
SiJWE12AAI	1
SiJWF01AAI	1
SiJWF02AAI	3
SiJWF03AAI	2
SiJWF04AAI	1
SiJWF05AAI	1
SiJWF06AAI	1
SiJWF07AAI	1
SiJWF08AAI	1
SiJWF09AAI	1
SiJWF10AAI	1
SiJWF11AAI	3
SiJWF12AAI	1
SiJWG01AAI	1
SiJWG02AAI	1
SiJWG03AAI	1
SiJWG04AAI	2
SiJWG05AAI	1
SiJWG06AAI	1
SiJWG07AAI	2
SiJWG08AAI	2
SiJWG09AAI	1
SiJWG10AAI	3
SiJWG11AAI	1
SiJWG12AAI	3
SiJWH01AAI	2
SiJWH02AAI	2
SiJWH03AAI	1
SiJWH04AAI	1
SiJWH05AAI	1
SiJWH06AAI	1
SiJWH07AAI	1
SiJWH08AAI	1
SiJWH09AAI	1
SiJWH10AAI	1
SiJWH11AAI	3
SiJWH12AAI	1
SiJWA01AAJ	3
SiJWA02AAJ	1
SiJWA03AAJ	1
SiJWA04AAJ	1
SiJWA05AAJ	1
SiJWA06AAJ	2
SiJWA07AAJ	1
SiJWA08AAJ	1
SiJWA09AAJ	1
SiJWA10AAJ	1
SiJWA11AAJ	2
SiJWA12AAJ	1
SiJWB01AAJ	1
SiJWB02AAJ	1
SiJWB03AAJ	1
SiJWB04AAJ	1
SiJWB05AAJ	2
SiJWB06AAJ	2
SiJWB07AAJ	1
SiJWB08AAJ	1
SiJWB09AAJ	2
SiJWB10AAJ	2
SiJWB11AAJ	1
SiJWB12AAJ	1
SiJWC01AAJ	1
SiJWC02AAJ	1
SiJWC03AAJ	1
SiJWC04AAJ	1
SiJWC05AAJ	1
SiJWC06AAJ	1
SiJWC07AAJ	1
SiJWC08AAJ	1
SiJWC09AAJ	1
SiJWC10AAJ	1
SiJWC11AAJ	1
SiJWC12AAJ	1
SiJWD01AAJ	1
SiJWD02AAJ	1
SiJWD03AAJ	2
SiJWD04AAJ	1
SiJWD05AAJ	0
SiJWD06AAJ	3
SiJWD07AAJ	1
SiJWD08AAJ	1
SiJWD09AAJ	1
SiJWD10AAJ	1
SiJWD11AAJ	1
SiJWD12AAJ	1
SiJWE01AAJ	1
SiJWE02AAJ	1
SiJWE03AAJ	1
SiJWE04AAJ	1
SiJWE05AAJ	1
SiJWE06AAJ	1
SiJWE07AAJ	1
SiJWE08AAJ	1
SiJWE09AAJ	0
SiJWE10AAJ	1
SiJWE11AAJ	1
SiJWE12AAJ	2
SiJWF01AAJ	1
SiJWF02AAJ	1
SiJWF03AAJ	1
SiJWF04AAJ	1
SiJWF05AAJ	1
SiJWF06AAJ	1
SiJWF07AAJ	3
SiJWF08AAJ	4
SiJWF09AAJ	4
SiJWF10AAJ	1
SiJWF11AAJ	1
SiJWF12AAJ	1
SiJWG01AAJ	1
SiJWG02AAJ	1
SiJWG03AAJ	2
SiJWG04AAJ	1
SiJWG05AAJ	1
SiJWG06AAJ	1
SiJWG07AAJ	1
SiJWG08AAJ	1
SiJWG09AAJ	1
SiJWG10AAJ	1
SiJWG11AAJ	1
SiJWG12AAJ	3
SiJWH01AAJ	1
SiJWH02AAJ	1
SiJWH03AAJ	1
SiJWH04AAJ	1
SiJWH05AAJ	1
SiJWH06AAJ	1
SiJWH07AAJ	1
SiJWH08AAJ	1
SiJWH09AAJ	1
SiJWH10AAJ	1
SiJWH11AAJ	1
SiJWH12AAJ	1
SiJWA01AAK	1
SiJWA02AAK	2
SiJWA03AAK	1
SiJWA04AAK	1
SiJWA05AAK	1
SiJWA06AAK	2
SiJWA07AAK	3
SiJWA08AAK	1
SiJWA09AAK	1
SiJWA10AAK	1
SiJWA11AAK	1
SiJWA12AAK	1
SiJWB01AAK	1
SiJWB02AAK	1
SiJWB03AAK	1
SiJWB04AAK	2
SiJWB05AAK	1
SiJWB06AAK	3
SiJWB07AAK	1
SiJWB08AAK	1
SiJWB09AAK	1
SiJWB10AAK	1
SiJWB11AAK	1
SiJWB12AAK	1
SiJWC01AAK	1
SiJWC02AAK	1
SiJWC03AAK	1
SiJWC04AAK	2
SiJWC05AAK	1
SiJWC06AAK	1
SiJWC07AAK	1
SiJWC08AAK	1
SiJWC09AAK	0
SiJWC10AAK	1
SiJWC11AAK	1
SiJWC12AAK	1
SiJWD01AAK	1
SiJWD02AAK	1
SiJWD03AAK	1
SiJWD04AAK	1
SiJWD05AAK	1
SiJWD06AAK	1
SiJWD07AAK	0
SiJWD08AAK	2
SiJWD09AAK	1
SiJWD10AAK	1
SiJWD11AAK	1
SiJWD12AAK	3
SiJWE01AAK	3
SiJWE02AAK	1
SiJWE03AAK	1
SiJWE04AAK	2
SiJWE05AAK	0
SiJWE06AAK	1
SiJWE07AAK	2
SiJWE08AAK	1
SiJWE09AAK	2
SiJWE10AAK	2
SiJWE11AAK	4
SiJWE12AAK	2
SiJWF01AAK	1
SiJWF02AAK	1
SiJWF03AAK	1
SiJWF04AAK	1
SiJWF05AAK	1
SiJWF06AAK	3
SiJWF07AAK	1
SiJWF08AAK	2
SiJWF09AAK	1
SiJWF10AAK	1
SiJWF11AAK	1
SiJWF12AAK	1
SiJWG01AAK	1
SiJWG02AAK	1
SiJWG03AAK	1
SiJWG04AAK	1
SiJWG05AAK	3
SiJWG06AAK	2
SiJWG07AAK	1
SiJWG08AAK	1
SiJWG09AAK	1
SiJWG10AAK	1
SiJWG11AAK	1
SiJWG12AAK	1
SiJWH01AAK	1
SiJWH02AAK	1
SiJWH03AAK	3
SiJWH04AAK	1
SiJWH05AAK	1
SiJWH06AAK	3
SiJWH07AAK	1
SiJWH08AAK	1
SiJWH09AAK	1
SiJWH10AAK	1
SiJWH11AAK	1
SiJWH12AAK	1
SiJWA01AAL	1
SiJWB01AAL	2
SiJWA02AAL	1
SiJWB02AAL	1
SiJWA03AAL	1
SiJWB03AAL	1
SiJWA04AAL	1
SiJWB04AAL	1
SiJWA05AAL	1
SiJWB05AAL	1
SiJWA06AAL	1
SiJWB06AAL	1
SiJWA07AAL	1
SiJWB07AAL	1
SiJWA08AAL	1
SiJWB08AAL	1
SiJWA09AAL	1
SiJWB09AAL	1
SiJWA10AAL	1
SiJWB10AAL	0
SiJWA11AAL	1
SiJWB11AAL	0
SiJWA12AAL	1
SiJWB12AAL	1
SiJWC01AAL	1
SiJWD01AAL	2
SiJWC02AAL	1
SiJWD02AAL	1
SiJWC03AAL	1
SiJWD03AAL	2
SiJWC04AAL	1
SiJWD04AAL	1
SiJWC05AAL	1
SiJWD05AAL	2
SiJWC06AAL	1
SiJWD06AAL	1
SiJWC07AAL	1
SiJWD07AAL	1
SiJWC08AAL	1
SiJWD08AAL	1
SiJWC09AAL	1
SiJWD09AAL	1
SiJWC10AAL	1
SiJWD10AAL	1
SiJWC11AAL	0
SiJWD11AAL	1
SiJWC12AAL	1
SiJWD12AAL	1
SiJWE01AAL	1
SiJWF01AAL	1
SiJWE02AAL	1
SiJWF02AAL	1
SiJWE03AAL	1
SiJWF03AAL	0
SiJWE04AAL	1
SiJWF04AAL	1
SiJWE05AAL	2
SiJWF05AAL	1
SiJWE06AAL	1
SiJWF06AAL	1
SiJWE07AAL	1
SiJWF07AAL	2
SiJWE08AAL	1
SiJWF08AAL	1
SiJWE09AAL	0
SiJWF09AAL	1
SiJWE10AAL	1
SiJWF10AAL	1
SiJWE11AAL	1
SiJWF11AAL	1
SiJWE12AAL	1
SiJWF12AAL	1
SiJWG01AAL	1
SiJWH01AAL	1
SiJWG02AAL	1
SiJWH02AAL	1
SiJWG03AAL	1
SiJWH03AAL	1
SiJWG04AAL	2
SiJWH04AAL	1
SiJWG05AAL	1
SiJWH05AAL	1
SiJWG06AAL	1
SiJWH06AAL	1
SiJWG07AAL	1
SiJWH07AAL	1
SiJWG08AAL	1
SiJWH08AAL	1
SiJWG09AAL	1
SiJWH09AAL	2
SiJWG10AAL	1
SiJWH10AAL	1
SiJWG11AAL	1
SiJWH11AAL	1
SiJWG12AAL	1
SiJWH12AAL	1
SiJWA01AAM	2
SiJWB01AAM	1
SiJWA02AAM	2
SiJWB02AAM	1
SiJWA03AAM	1
SiJWB03AAM	1
SiJWA04AAM	1
SiJWB04AAM	1
SiJWA05AAM	1
SiJWB05AAM	1
SiJWA06AAM	1
SiJWB06AAM	0
SiJWA07AAM	1
SiJWB07AAM	1
SiJWA08AAM	1
SiJWB08AAM	1
SiJWA09AAM	1
SiJWB09AAM	1
SiJWA10AAM	1
SiJWB10AAM	1
SiJWA11AAM	1
SiJWB11AAM	1
SiJWA12AAM	1
SiJWB12AAM	1
SiJWC01AAM	1
SiJWD01AAM	1
SiJWC02AAM	1
SiJWD02AAM	1
SiJWC03AAM	2
SiJWD03AAM	1
SiJWC04AAM	1
SiJWD04AAM	1
SiJWC05AAM	1
SiJWD05AAM	1
SiJWC06AAM	1
SiJWD06AAM	1
SiJWC07AAM	1
SiJWD07AAM	1
SiJWC08AAM	1
SiJWD08AAM	1
SiJWC09AAM	3
SiJWD09AAM	1
SiJWC10AAM	1
SiJWD10AAM	1
SiJWC11AAM	2
SiJWD11AAM	2
SiJWC12AAM	1
SiJWD12AAM	1
SiJWE01AAM	3
SiJWF01AAM	3
SiJWE02AAM	1
SiJWF02AAM	3
SiJWE03AAM	1
SiJWF03AAM	2
SiJWE04AAM	1
SiJWF04AAM	1
SiJWE05AAM	1
SiJWF05AAM	1
SiJWE06AAM	2
SiJWF06AAM	1
SiJWE07AAM	1
SiJWF07AAM	1
SiJWE08AAM	1
SiJWF08AAM	2
SiJWE09AAM	1
SiJWF09AAM	1
SiJWE10AAM	1
SiJWF10AAM	1
SiJWE11AAM	1
SiJWF11AAM	1
SiJWE12AAM	1
SiJWF12AAM	2
SiJWG01AAM	1
SiJWH01AAM	2
SiJWG02AAM	1
SiJWH02AAM	1
SiJWG03AAM	1
SiJWH03AAM	2
SiJWG04AAM	1
SiJWH04AAM	1
SiJWG05AAM	2
SiJWH05AAM	2
SiJWG06AAM	1
SiJWH06AAM	1
SiJWG07AAM	2
SiJWH07AAM	2
SiJWG08AAM	2
SiJWH08AAM	1
SiJWG09AAM	1
SiJWH09AAM	1
SiJWG10AAM	1
SiJWH10AAM	1
SiJWG11AAM	1
SiJWH11AAM	2
SiJWG12AAM	1
SiJWH12AAM	2
SiJWA01AAN	1
SiJWB01AAN	1
SiJWA02AAN	3
SiJWB02AAN	1
SiJWA03AAN	2
SiJWB03AAN	1
SiJWA04AAN	1
SiJWB04AAN	1
SiJWA05AAN	1
SiJWB05AAN	2
SiJWA06AAN	1
SiJWB06AAN	1
SiJWA07AAN	1
SiJWB07AAN	1
SiJWA08AAN	1
SiJWB08AAN	1
SiJWA09AAN	1
SiJWB09AAN	1
SiJWA10AAN	1
SiJWB10AAN	1
SiJWA11AAN	1
SiJWB11AAN	2
SiJWA12AAN	1
SiJWB12AAN	1
SiJWC01AAN	1
SiJWD01AAN	1
SiJWC02AAN	1
SiJWD02AAN	1
SiJWC03AAN	1
SiJWD03AAN	1
SiJWC04AAN	1
SiJWD04AAN	1
SiJWC05AAN	1
SiJWD05AAN	1
SiJWC06AAN	2
SiJWD06AAN	1
SiJWC07AAN	3
SiJWD07AAN	1
SiJWC08AAN	2
SiJWD08AAN	1
SiJWC09AAN	1
SiJWD09AAN	1
SiJWC10AAN	2
SiJWD10AAN	1
SiJWC11AAN	1
SiJWD11AAN	1
SiJWC12AAN	1
SiJWD12AAN	2
SiJWE01AAN	1
SiJWF01AAN	1
SiJWE02AAN	1
SiJWF02AAN	1
SiJWE03AAN	1
SiJWF03AAN	1
SiJWE04AAN	1
SiJWF04AAN	1
SiJWE05AAN	1
SiJWF05AAN	1
SiJWE06AAN	1
SiJWF06AAN	1
SiJWE07AAN	1
SiJWF07AAN	1
SiJWE08AAN	1
SiJWF08AAN	1
SiJWE09AAN	1
SiJWF09AAN	1
SiJWE10AAN	1
SiJWF10AAN	1
SiJWE11AAN	1
SiJWF11AAN	1
SiJWE12AAN	1
SiJWF12AAN	1
SiJWG01AAN	1
SiJWH01AAN	1
SiJWG02AAN	3
SiJWH02AAN	1
SiJWG03AAN	2
SiJWH03AAN	1
SiJWG04AAN	1
SiJWH04AAN	1
SiJWG05AAN	1
SiJWH05AAN	1
SiJWG06AAN	1
SiJWH06AAN	1
SiJWG07AAN	1
SiJWH07AAN	1
SiJWG08AAN	3
SiJWH08AAN	1
SiJWG09AAN	1
SiJWH09AAN	1
SiJWG10AAN	1
SiJWH10AAN	1
SiJWG11AAN	1
SiJWH11AAN	1
SiJWG12AAN	1
SiJWH12AAN	1
SiJWA01AAO	2
SiJWB01AAO	0
SiJWA02AAO	1
SiJWB02AAO	1
SiJWA03AAO	1
SiJWB03AAO	1
SiJWA04AAO	1
SiJWB04AAO	1
SiJWA05AAO	1
SiJWB05AAO	1
SiJWA06AAO	1
SiJWB06AAO	1
SiJWA07AAO	1
SiJWB07AAO	2
SiJWA08AAO	2
SiJWB08AAO	4
SiJWA09AAO	1
SiJWB09AAO	1
SiJWA10AAO	1
SiJWB10AAO	1
SiJWA11AAO	1
SiJWB11AAO	1
SiJWA12AAO	1
SiJWB12AAO	1
SiJWC01AAO	1
SiJWD01AAO	1
SiJWC02AAO	1
SiJWD02AAO	1
SiJWC03AAO	1
SiJWD03AAO	1
SiJWC04AAO	1
SiJWD04AAO	2
SiJWC05AAO	1
SiJWD05AAO	1
SiJWC06AAO	1
SiJWD06AAO	1
SiJWC07AAO	1
SiJWD07AAO	1
SiJWC08AAO	1
SiJWD08AAO	1
SiJWC09AAO	1
SiJWD09AAO	1
SiJWC10AAO	1
SiJWD10AAO	1
SiJWC11AAO	1
SiJWD11AAO	0
SiJWC12AAO	0
SiJWD12AAO	1
SiJWE01AAO	1
SiJWF01AAO	1
SiJWE02AAO	1
SiJWF02AAO	1
SiJWE03AAO	1
SiJWF03AAO	1
SiJWE04AAO	1
SiJWF04AAO	1
SiJWE05AAO	1
SiJWF05AAO	1
SiJWE06AAO	1
SiJWF06AAO	1
SiJWE07AAO	1
SiJWF07AAO	1
SiJWE08AAO	1
SiJWF08AAO	1
SiJWE09AAO	1
SiJWF09AAO	1
SiJWE10AAO	1
SiJWF10AAO	1
SiJWE11AAO	1
SiJWF11AAO	1
SiJWE12AAO	3
SiJWF12AAO	1
SiJWG01AAO	1
SiJWH01AAO	1
SiJWG02AAO	0
SiJWH02AAO	1
SiJWG03AAO	0
SiJWH03AAO	1
SiJWG04AAO	1
SiJWH04AAO	1
SiJWG05AAO	1
SiJWH05AAO	1
SiJWG06AAO	1
SiJWH06AAO	1
SiJWG07AAO	1
SiJWH07AAO	1
SiJWG08AAO	1
SiJWH08AAO	1
SiJWG09AAO	1
SiJWH09AAO	1
SiJWG10AAO	1
SiJWH10AAO	1
SiJWG11AAO	1
SiJWH11AAO	1
SiJWG12AAO	1
SiJWH12AAO	1
SiJWA01AAP	1
SiJWB01AAP	1
SiJWA02AAP	3
SiJWB02AAP	0
SiJWA03AAP	1
SiJWB03AAP	1
SiJWA04AAP	1
SiJWB04AAP	3
SiJWA05AAP	1
SiJWB05AAP	0
SiJWA06AAP	1
SiJWB06AAP	3
SiJWA07AAP	1
SiJWB07AAP	1
SiJWA08AAP	2
SiJWB08AAP	1
SiJWA09AAP	1
SiJWB09AAP	1
SiJWA10AAP	3
SiJWB10AAP	1
SiJWA11AAP	1
SiJWB11AAP	1
SiJWA12AAP	1
SiJWB12AAP	1
SiJWC01AAP	1
SiJWD01AAP	1
SiJWC02AAP	1
SiJWD02AAP	1
SiJWC03AAP	1
SiJWD03AAP	1
SiJWC04AAP	1
SiJWD04AAP	1
SiJWC05AAP	1
SiJWD05AAP	1
SiJWC06AAP	1
SiJWD06AAP	1
SiJWC07AAP	1
SiJWD07AAP	1
SiJWC08AAP	1
SiJWD08AAP	1
SiJWC09AAP	1
SiJWD09AAP	1
SiJWC10AAP	3
SiJWD10AAP	1
SiJWC11AAP	1
SiJWD11AAP	1
SiJWC12AAP	1
SiJWD12AAP	1
SiJWE01AAP	1
SiJWF01AAP	1
SiJWE02AAP	1
SiJWF02AAP	0
SiJWE03AAP	1
SiJWF03AAP	1
SiJWE04AAP	1
SiJWF04AAP	1
SiJWE05AAP	1
SiJWF05AAP	0
SiJWE06AAP	1
SiJWF06AAP	1
SiJWE07AAP	1
SiJWF07AAP	1
SiJWE08AAP	1
SiJWF08AAP	1
SiJWE09AAP	1
SiJWF09AAP	1
SiJWE10AAP	1
SiJWF10AAP	1
SiJWE11AAP	1
SiJWF11AAP	1
SiJWE12AAP	1
SiJWF12AAP	1
SiJWG01AAP	1
SiJWH01AAP	1
SiJWG02AAP	1
SiJWH02AAP	1
SiJWG03AAP	1
SiJWH03AAP	1
SiJWG04AAP	1
SiJWH04AAP	1
SiJWG05AAP	0
SiJWH05AAP	1
SiJWG06AAP	0
SiJWH06AAP	1
SiJWG07AAP	1
SiJWH07AAP	1
SiJWG08AAP	1
SiJWH08AAP	1
SiJWG09AAP	1
SiJWH09AAP	1
SiJWG10AAP	1
SiJWH10AAP	1
SiJWG11AAP	1
SiJWH11AAP	2
SiJWG12AAP	2
SiJWH12AAP	1
SiJWA01AAQ	1
SiJWB01AAQ	1
SiJWA02AAQ	1
SiJWB02AAQ	1
SiJWA03AAQ	1
SiJWB03AAQ	1
SiJWA04AAQ	1
SiJWB04AAQ	1
SiJWA05AAQ	1
SiJWB05AAQ	0
SiJWA06AAQ	1
SiJWB06AAQ	1
SiJWA07AAQ	1
SiJWB07AAQ	1
SiJWA08AAQ	1
SiJWB08AAQ	1
SiJWA09AAQ	1
SiJWB09AAQ	1
SiJWA10AAQ	1
SiJWB10AAQ	1
SiJWA11AAQ	1
SiJWB11AAQ	1
SiJWA12AAQ	0
SiJWB12AAQ	2
SiJWC01AAQ	1
SiJWD01AAQ	2
SiJWC02AAQ	1
SiJWD02AAQ	1
SiJWC03AAQ	1
SiJWD03AAQ	1
SiJWC04AAQ	1
SiJWD04AAQ	1
SiJWC05AAQ	2
SiJWD05AAQ	1
SiJWC06AAQ	1
SiJWD06AAQ	1
SiJWC07AAQ	1
SiJWD07AAQ	1
SiJWC08AAQ	1
SiJWD08AAQ	1
SiJWC09AAQ	1
SiJWD09AAQ	1
SiJWC10AAQ	1
SiJWD10AAQ	1
SiJWC11AAQ	1
SiJWD11AAQ	1
SiJWC12AAQ	1
SiJWD12AAQ	1
SiJWE01AAQ	1
SiJWF01AAQ	1
SiJWE02AAQ	1
SiJWF02AAQ	1
SiJWE03AAQ	1
SiJWF03AAQ	1
SiJWE04AAQ	1
SiJWF04AAQ	1
SiJWE05AAQ	1
SiJWF05AAQ	1
SiJWE06AAQ	1
SiJWF06AAQ	1
SiJWE07AAQ	1
SiJWF07AAQ	1
SiJWE08AAQ	1
SiJWF08AAQ	1
SiJWE09AAQ	1
SiJWF09AAQ	1
SiJWE10AAQ	1
SiJWF10AAQ	1
SiJWE11AAQ	1
SiJWF11AAQ	1
SiJWE12AAQ	1
SiJWF12AAQ	2
SiJWG01AAQ	1
SiJWH01AAQ	1
SiJWG02AAQ	1
SiJWH02AAQ	1
SiJWG03AAQ	1
SiJWH03AAQ	1
SiJWG04AAQ	1
SiJWH04AAQ	1
SiJWG05AAQ	1
SiJWH05AAQ	1
SiJWG06AAQ	1
SiJWH06AAQ	1
SiJWG07AAQ	1
SiJWH07AAQ	1
SiJWG08AAQ	1
SiJWH08AAQ	2
SiJWG09AAQ	1
SiJWH09AAQ	1
SiJWG10AAQ	1
SiJWH10AAQ	1
SiJWG11AAQ	1
SiJWH11AAQ	1
SiJWG12AAQ	1
SiJWH12AAQ	1
SiJWA01AAR	1
SiJWB01AAR	1
SiJWA02AAR	1
SiJWB02AAR	2
SiJWA03AAR	0
SiJWB03AAR	1
SiJWA04AAR	1
SiJWB04AAR	1
SiJWA05AAR	1
SiJWB05AAR	1
SiJWA06AAR	1
SiJWB06AAR	1
SiJWA07AAR	1
SiJWB07AAR	1
SiJWA08AAR	1
SiJWB08AAR	1
SiJWA09AAR	1
SiJWB09AAR	1
SiJWA10AAR	1
SiJWB10AAR	1
SiJWA11AAR	1
SiJWB11AAR	1
SiJWA12AAR	1
SiJWB12AAR	1
SiJWC01AAR	1
SiJWD01AAR	1
SiJWC02AAR	1
SiJWD02AAR	1
SiJWC03AAR	1
SiJWD03AAR	1
SiJWC04AAR	1
SiJWD04AAR	1
SiJWC05AAR	2
SiJWD05AAR	1
SiJWC06AAR	1
SiJWD06AAR	1
SiJWC07AAR	2
SiJWD07AAR	1
SiJWC08AAR	1
SiJWD08AAR	1
SiJWC09AAR	1
SiJWD09AAR	1
SiJWC10AAR	1
SiJWD10AAR	2
SiJWC11AAR	1
SiJWD11AAR	1
SiJWC12AAR	1
SiJWD12AAR	1
SiJWE01AAR	1
SiJWF01AAR	1
SiJWE02AAR	1
SiJWF02AAR	1
SiJWE03AAR	1
SiJWF03AAR	1
SiJWE04AAR	1
SiJWF04AAR	1
SiJWE05AAR	1
SiJWF05AAR	1
SiJWE06AAR	1
SiJWF06AAR	2
SiJWE07AAR	1
SiJWF07AAR	1
SiJWE08AAR	1
SiJWF08AAR	2
SiJWE09AAR	1
SiJWF09AAR	0
SiJWE10AAR	1
SiJWF10AAR	1
SiJWE11AAR	1
SiJWF11AAR	1
SiJWE12AAR	1
SiJWF12AAR	1
SiJWG01AAR	3
SiJWH01AAR	1
SiJWG02AAR	1
SiJWH02AAR	2
SiJWG03AAR	1
SiJWH03AAR	1
SiJWG04AAR	1
SiJWH04AAR	1
SiJWG05AAR	1
SiJWH05AAR	1
SiJWG06AAR	1
SiJWH06AAR	1
SiJWG07AAR	1
SiJWH07AAR	2
SiJWG08AAR	1
SiJWH08AAR	1
SiJWG09AAR	1
SiJWH09AAR	1
SiJWG10AAR	1
SiJWH10AAR	1
SiJWG11AAR	1
SiJWH11AAR	1
SiJWG12AAR	0
SiJWH12AAR	1
SiJWA01AAS	2
SiJWB01AAS	1
SiJWA02AAS	1
SiJWB02AAS	1
SiJWA03AAS	1
SiJWB03AAS	1
SiJWA04AAS	1
SiJWB04AAS	1
SiJWA05AAS	1
SiJWB05AAS	1
SiJWA06AAS	1
SiJWB06AAS	1
SiJWA07AAS	1
SiJWB07AAS	1
SiJWA08AAS	1
SiJWB08AAS	1
SiJWA09AAS	1
SiJWB09AAS	1
SiJWA10AAS	1
SiJWB10AAS	1
SiJWA11AAS	1
SiJWB11AAS	1
SiJWA12AAS	1
SiJWB12AAS	1
SiJWC01AAS	1
SiJWD01AAS	1
SiJWC02AAS	1
SiJWD02AAS	2
SiJWC03AAS	1
SiJWD03AAS	2
SiJWC04AAS	1
SiJWD04AAS	1
SiJWC05AAS	1
SiJWD05AAS	1
SiJWC06AAS	1
SiJWD06AAS	1
SiJWC07AAS	1
SiJWD07AAS	1
SiJWC08AAS	1
SiJWD08AAS	1
SiJWC09AAS	1
SiJWD09AAS	1
SiJWC10AAS	1
SiJWD10AAS	1
SiJWC11AAS	1
SiJWD11AAS	1
SiJWC12AAS	1
SiJWD12AAS	1
SiJWE01AAS	1
SiJWF01AAS	1
SiJWE02AAS	1
SiJWF02AAS	1
SiJWE03AAS	1
SiJWF03AAS	1
SiJWE04AAS	1
SiJWF04AAS	1
SiJWE05AAS	1
SiJWF05AAS	2
SiJWE06AAS	1
SiJWF06AAS	1
SiJWE07AAS	2
SiJWF07AAS	1
SiJWE08AAS	1
SiJWF08AAS	1
SiJWE09AAS	1
SiJWF09AAS	1
SiJWE10AAS	1
SiJWF10AAS	1
SiJWE11AAS	1
SiJWF11AAS	1
SiJWE12AAS	1
SiJWF12AAS	1
SiJWG01AAS	1
SiJWH01AAS	1
SiJWG02AAS	1
SiJWH02AAS	1
SiJWG03AAS	1
SiJWH03AAS	1
SiJWG04AAS	1
SiJWH04AAS	1
SiJWG05AAS	1
SiJWH05AAS	2
SiJWG06AAS	1
SiJWH06AAS	2
SiJWG07AAS	1
SiJWH07AAS	1
SiJWG08AAS	1
SiJWH08AAS	1
SiJWG09AAS	1
SiJWH09AAS	1
SiJWG10AAS	1
SiJWH10AAS	1
SiJWG11AAS	1
SiJWH11AAS	1
SiJWG12AAS	1
SiJWH12AAS	1
SiJWA01AAT	1
SiJWB01AAT	1
SiJWA02AAT	1
SiJWB02AAT	1
SiJWA03AAT	1
SiJWB03AAT	1
SiJWA04AAT	3
SiJWB04AAT	1
SiJWA05AAT	2
SiJWB05AAT	1
SiJWA06AAT	1
SiJWB06AAT	3
SiJWA07AAT	1
SiJWB07AAT	1
SiJWA08AAT	1
SiJWB08AAT	1
SiJWA09AAT	1
SiJWB09AAT	1
SiJWA10AAT	1
SiJWB10AAT	1
SiJWA11AAT	2
SiJWB11AAT	1
SiJWA12AAT	1
SiJWB12AAT	1
SiJWC01AAT	1
SiJWD01AAT	1
SiJWC02AAT	1
SiJWD02AAT	2
SiJWC03AAT	1
SiJWD03AAT	1
SiJWC04AAT	1
SiJWD04AAT	1
SiJWC05AAT	1
SiJWD05AAT	1
SiJWC06AAT	1
SiJWD06AAT	1
SiJWC07AAT	1
SiJWD07AAT	1
SiJWC08AAT	1
SiJWD08AAT	2
SiJWC09AAT	1
SiJWD09AAT	1
SiJWC10AAT	1
SiJWD10AAT	1
SiJWC11AAT	1
SiJWD11AAT	1
SiJWC12AAT	1
SiJWD12AAT	1
SiJWE01AAT	1
SiJWF01AAT	2
SiJWE02AAT	1
SiJWF02AAT	2
SiJWE03AAT	1
SiJWF03AAT	1
SiJWE04AAT	1
SiJWF04AAT	1
SiJWE05AAT	2
SiJWF05AAT	2
SiJWE06AAT	0
SiJWF06AAT	1
SiJWE07AAT	1
SiJWF07AAT	1
SiJWE08AAT	1
SiJWF08AAT	1
SiJWE09AAT	1
SiJWF09AAT	1
SiJWE10AAT	2
SiJWF10AAT	1
SiJWE11AAT	2
SiJWF11AAT	1
SiJWE12AAT	1
SiJWF12AAT	1
SiJWG01AAT	1
SiJWH01AAT	1
SiJWG02AAT	2
SiJWH02AAT	1
SiJWG03AAT	1
SiJWH03AAT	1
SiJWG04AAT	1
SiJWH04AAT	1
SiJWG05AAT	1
SiJWH05AAT	1
SiJWG06AAT	1
SiJWH06AAT	1
SiJWG07AAT	1
SiJWH07AAT	2
SiJWG08AAT	1
SiJWH08AAT	1
SiJWG09AAT	1
SiJWH09AAT	1
SiJWG10AAT	1
SiJWH10AAT	1
SiJWG11AAT	2
SiJWH11AAT	1
SiJWG12AAT	1
SiJWH12AAT	1
SiJWA01AAU	1
SiJWB01AAU	1
SiJWA02AAU	1
SiJWB02AAU	1
SiJWA03AAU	1
SiJWB03AAU	1
SiJWA04AAU	1
SiJWB04AAU	1
SiJWA05AAU	2
SiJWB05AAU	2
SiJWA06AAU	1
SiJWB06AAU	2
SiJWA07AAU	2
SiJWB07AAU	1
SiJWA08AAU	1
SiJWB08AAU	0
SiJWA09AAU	1
SiJWB09AAU	1
SiJWA10AAU	1
SiJWB10AAU	2
SiJWA11AAU	1
SiJWB11AAU	1
SiJWA12AAU	2
SiJWB12AAU	1
SiJWC01AAU	1
SiJWD01AAU	2
SiJWC02AAU	0
SiJWD02AAU	1
SiJWC03AAU	1
SiJWD03AAU	2
SiJWC04AAU	1
SiJWD04AAU	1
SiJWC05AAU	1
SiJWD05AAU	1
SiJWC06AAU	2
SiJWD06AAU	1
SiJWC07AAU	1
SiJWD07AAU	1
SiJWC08AAU	1
SiJWD08AAU	1
SiJWC09AAU	2
SiJWD09AAU	1
SiJWC10AAU	1
SiJWD10AAU	1
SiJWC11AAU	1
SiJWD11AAU	1
SiJWC12AAU	2
SiJWD12AAU	1
SiJWE01AAU	1
SiJWF01AAU	0
SiJWE02AAU	1
SiJWF02AAU	1
SiJWE03AAU	1
SiJWF03AAU	1
SiJWE04AAU	1
SiJWF04AAU	1
SiJWE05AAU	1
SiJWF05AAU	1
SiJWE06AAU	1
SiJWF06AAU	1
SiJWE07AAU	1
SiJWF07AAU	1
SiJWE08AAU	1
SiJWF08AAU	1
SiJWE09AAU	1
SiJWF09AAU	1
SiJWE10AAU	0
SiJWF10AAU	1
SiJWE11AAU	1
SiJWF11AAU	1
SiJWE12AAU	1
SiJWF12AAU	1
SiJWG01AAU	1
SiJWH01AAU	1
SiJWG02AAU	1
SiJWH02AAU	1
[truncated: 20,564 more rows]
