# Supplementary material for: An annotated cDNA library and microarray for large-scale gene-expression studies in the ant Solenopsis invicta
Source: Genome Biol. 2007 Jan 15;8(1):R9. doi: 10.1186/gb-2007-8-1-r9 (PMC1839134; doi:10.1186/gb-2007-8-1-r9)
Supplement: Additional data file 9 — Fire ant assembled sequences that had at least one cDNA clone with a good (single-band) PCR product [file gb-2007-8-1-r9-S9.xls]

## Sheet: result_contig_w_band
Additional data file 9: Fire ant assembled sequences with at least one EST with a good PCR product
Fire ant assembled sequence	Number of clones with 1 PCR product
SI.CL.26.cl.2618.Contig1	4
SI.CL.37.cl.3794.Contig1	2
SiJWD04CAN2.scf	1
SI.CL.29.cl.2963.Contig1	2
SI.CL.24.cl.2407.SiJWG10ADP.scf	1
SiJWF08ABU.scf	1
SI.CL.7.cl.783.SiJWE01ACM.scf	1
SiJWD08BCY2.scf	1
SI.CL.18.cl.1885.Contig1	4
SiJWB08BCR.scf	1
SI.CL.17.cl.1789.SiJWH04ADE.scf	1
SI.CL.28.cl.2832.Contig1	3
SI.CL.9.cl.985.Contig1	13
SiJWC09CAU2.scf	1
SI.CL.38.cl.3829.Contig1	5
SiJWH10ABR.scf	1
SI.CL.17.cl.1726.Contig1	2
SiJWC06BBX.scf	1
SI.CL.40.cl.4042.Contig1	2
SI.CL.1.cl.123.Contig1	9
SiJWC12BAX.scf	1
SI.CL.42.cl.4262.Contig1	2
SI.CL.1.cl.168.Contig1	5
SI.CL.22.cl.2296.Contig1	5
SI.CL.15.cl.1514.Contig1	1
SI.CL.4.cl.496.Contig1	1
SI.CL.4.cl.437.SiJWE02BEA.scf	1
SI.CL.42.cl.4282.Contig1	1
SiJWB01ADW.scf	1
SiJWB11CAQ2.scf	1
SiJWH03BDY.scf	1
SiJWB09AAA2.scf	1
SI.CL.32.cl.3223.Contig1	1
SI.CL.40.cl.4017.Contig1	2
SiJWD06BAU.scf	1
SI.CL.0.cl.002.SiJWA07AAY.scf	1
SI.CL.17.cl.1736.SiJWD04ACV.scf	1
SiJWG01BDX.scf	1
SI.CL.17.cl.1729.Contig1	2
SiJWC03ADO.scf	1
SI.CL.3.cl.331.SiJWF10ACA.scf	1
SiJWG02ABY.scf	1
SiJWA05CAN.scf	1
SI.CL.19.cl.1954.SiJWH10CAI2.scf	1
SiJWA12BAP.scf	1
SI.CL.24.cl.2470.SiJWF03CAU2.scf	1
SiJWE10ACB.scf	1
SI.CL.36.cl.3662.Contig1	2
SI.CL.8.cl.899.Contig1	3
SI.CL.31.cl.3181.Contig1	1
SI.CL.15.cl.1534.Contig1	6
SiJWG08ADU.scf	1
SI.CL.25.cl.2524.Contig2	1
SI.CL.3.cl.352.Contig1	2
SI.CL.15.cl.1551.Contig1	5
SI.CL.24.cl.2449.Contig1	2
SiJWG12BDJ.scf	1
SiJWC04BDB2.scf	1
SiJWC08AAC2.scf	1
SI.CL.5.cl.502.SiJWF02BAP.scf	1
SiJWH08CAB.scf	1
SiJWC09ACY.scf	1
SiJWC01ADW.scf	1
SI.CL.20.cl.2016.SiJWA06BBC2.scf	1
SI.CL.1.cl.143.Contig1	9
SI.CL.29.cl.2998.SiJWC02BCLC.tag5_C05_05.scf	1
SiJWG11ACY.scf	1
SI.CL.8.cl.839.Contig1	2
SiJWG01BBY.scf	1
SI.CL.2.cl.284.Contig1	2
SI.CL.29.cl.2907.Contig1	3
SI.CL.15.cl.1555.Contig1	3
SiJWF09BAD.scf	1
SI.CL.9.cl.947.Contig1	2
SiJWH12BBT.scf	1
SiJWD08ABB.scf	1
SI.CL.23.cl.2338.Contig2	2
SI.CL.3.cl.321.Contig2	2
SI.CL.4.cl.468.Contig1	9
SiJWH07BDQ.scf	1
SI.CL.5.cl.502.Contig1	3
SiJWF04BAS.scf	1
SiJWH08ADH.scf	1
SI.CL.6.cl.641.Contig1	2
SI.CL.34.cl.3420.Contig1	2
SiJWB02BAW2.scf	1
SiJWE08ABE.tag5_E08_10.scf	1
SiJWH03BCQ.tag5_H03_15.scf	1
SI.CL.2.cl.234.Contig1	5
SiJWG03ACI.scf	1
SI.CL.12.cl.1281.Contig1	4
SiJWF05BAJ.scf	1
SI.CL.38.cl.3839.SiJWE09BCJ3.scf	1
SiJWE04BDX.scf	1
SI.CL.0.cl.026.Contig1	3
SI.CL.7.cl.777.SiJWC11ACM.scf	1
SiJWC02ADV.scf	1
SiJWA01AAQ.scf	1
SI.CL.15.cl.1521.Contig1	3
SiJWH01BBD2.scf	1
SiJWF02ABV.scf	1
SI.CL.42.cl.4208.Contig1	2
SiJWG05BAO.scf	1
SiJWE01BDQ.scf	1
SI.CL.19.cl.1945.Contig1	2
SiJWE05CAV.scf	1
SiJWA09AAS.scf	1
SiJWC06AAR.scf	1
SI.CL.11.cl.1192.Contig1	1
SI.CL.15.cl.1522.Contig1	3
SiJWD10ACL.scf	1
SiJWB05ADH.scf	1
SiJWA06AAO.scf	1
SiJWB10ABK.scf	1
SiJWE10AAY.scf	1
SI.CL.41.cl.4165.Contig1	2
SI.CL.19.cl.1971.SiJWD11AAW.scf	1
SI.CL.43.cl.4336.Contig1	2
SI.CL.11.cl.1166.SiJWF02CAT2.scf	1
SI.CL.26.cl.2654.SiJWC06BAI.scf	1
SiJWC05ABP2.scf	1
SiJWB12AAB.scf	1
SI.CL.22.cl.2292.SiJWC11CAS2.scf	1
SiJWE07BBD2.scf	1
SiJWE09BBI.scf	1
SiJWE07BAC.scf	1
SiJWC07ACU.scf	1
SiJWB11BAH.scf	1
SI.CL.9.cl.946.SiJWG04ADP.scf	1
SiJWG12CAF2.scf	1
SI.CL.35.cl.3542.Contig1	2
SiJWH08BBS.scf	1
SiJWE10BAV.scf	1
SI.CL.43.cl.4300.Contig1	1
SiJWF09BAR.scf	1
SiJWD05BBX.scf	1
SI.CL.24.cl.2475.Contig1	2
SI.CL.5.cl.508.Contig1	12
SI.CL.25.cl.2583.Contig1	2
SiJWD11AAG.scf	1
SiJWH01BBK.scf	1
SI.CL.30.cl.3079.Contig1	3
SI.CL.36.cl.3684.Contig1	2
SiJWD09ADA.scf	1
SI.CL.5.cl.503.SiJWG11ADC.scf	1
SI.CL.4.cl.475.Contig1	1
SiJWF08BBD2.scf	1
SiJWB06BAB.scf	1
SiJWA06AAU.scf	1
SiJWC06ADJ.scf	1
SI.CL.23.cl.2329.Contig1	2
SiJWA09BCC.tag5_A09_01.scf	1
SI.CL.19.cl.1977.SiJWC02ABG.scf	1
SiJWF12CAV.scf	1
SiJWE10ADP.scf	1
SI.CL.18.cl.1889.Contig1	3
SiJWD10ACK.scf	1
SI.CL.8.cl.803.Contig1	4
SiJWG06BAS.scf	1
SiJWG03ABE.tag5_G03_13.scf	1
SI.CL.6.cl.625.Contig1	13
SiJWE01BCT3.scf	1
SI.CL.7.cl.712.Contig1	2
SiJWG05BDA2.scf	1
SI.CL.43.cl.4325.SiJWF07CAM2.scf	1
SI.CL.21.cl.2129.Contig1	2
SI.CL.5.cl.520.Contig1	2
SI.CL.32.cl.3261.Contig1	4
SiJWH09BCR.scf	1
SiJWE05ADD.scf	1
SI.CL.3.cl.350.Contig2	4
SI.CL.16.cl.1699.Contig1	2
SI.CL.23.cl.2331.Contig1	5
SiJWH01BBC2.scf	1
SiJWE06ACL.scf	1
SiJWE02ADC.scf	1
SiJWG10BBQ2.scf	1
SI.CL.15.cl.1553.Contig1	1
SI.CL.33.cl.3387.Contig1	2
SiJWA06ACG.scf	1
SI.CL.3.cl.331.Contig4	15
SiJWD11BAL.scf	1
SiJWA09ABD.scf	1
SiJWE07ADH.scf	1
SI.CL.20.cl.2032.SiJWG03ADM.scf	1
SiJWH03BBX.scf	1
SiJWA04ACY.scf	1
SI.CL.1.cl.141.Contig1	9
SiJWE02AAL.scf	1
SI.CL.6.cl.646.Contig1	4
SI.CL.37.cl.3752.Contig1	2
SiJWB08BDY.scf	1
SI.CL.11.cl.1122.Contig1	2
SI.CL.31.cl.3193.Contig1	5
SI.CL.1.cl.162.SiJWC08BCZ2.scf	1
SiJWE05CAA.scf	1
SiJWG01CAV.scf	1
SiJWA07ADM.scf	1
SI.CL.6.cl.625.SiJWD06ABH.scf	1
SI.CL.39.cl.3902.Contig1	2
SiJWH05ABG.scf	1
SiJWH07BCK2.scf	1
SI.CL.17.cl.1745.Contig1	2
SI.CL.33.cl.3333.Contig1	3
SiJWH09BDU2.scf	1
SiJWB08AAV.scf	1
SiJWG10ADA.scf	1
SI.CL.27.cl.2778.Contig1	3
SiJWH05AAJ.scf	1
SiJWH06BCC.tag5_H06_16.scf	1
SiJWH09ACG.scf	1
SiJWB06ABY.scf	1
SI.CL.2.cl.242.Contig1	6
SiJWH06BCZ2.scf	1
SiJWD11ADY.scf	1
SiJWH11AA1_evro_pl7_Sp6.scf	1
SiJWC10CAT2.scf	1
SiJWF06CAD.scf	1
SiJWE12CAL2.scf	1
SiJWE02CACC.tag5_E10_10.scf	1
SiJWD10ADC.scf	1
SI.CL.1.cl.105.SiJWD05BDPR5G05.scf	1
SiJWE01BBY.scf	1
SI.CL.42.cl.4243.Contig1	3
SI.CL.35.cl.3511.Contig1	2
SiJWE08ACX.scf	1
SiJWD11ABO.scf	1
SiJWC09ACT.scf	1
SiJWG07AAE.tag5_G07_13.scf	1
SiJWB04ADG.scf	1
SiJWF11BCR.scf	1
SI.CL.41.cl.4198.SiJWB06BCU2.scf	1
SiJWD09CAS.scf	1
SI.CL.41.cl.4117.Contig1	3
SiJWD11BDS2.scf	1
SiJWF01AAJ.scf	1
SiJWE03BCS2.scf	1
SI.CL.11.cl.1144.Contig1	5
SiJWH08AAV.scf	1
SiJWF09BCZ2.scf	1
SI.CL.24.cl.2446.Contig1	2
SI.CL.42.cl.4241.Contig1	2
SiJWC08ACR.scf	1
SI.CL.13.cl.1391.Contig1	1
SiJWD11CAA.scf	1
SiJWD12ADI.scf	1
SiJWH08BDS2.scf	1
SI.CL.35.cl.3544.Contig1	2
SiJWB11ACM.scf	1
SI.CL.15.cl.1524.Contig1	3
SI.CL.35.cl.3513.Contig1	2
SiJWA05ABL.scf	1
SI.CL.6.cl.624.Contig1	2
SiJWE12ACW.scf	1
SI.CL.22.cl.2235.Contig1	1
SI.CL.40.cl.4083.Contig1	2
SiJWD05AAU.scf	1
SiJWC11BBJ2.scf	1
SI.CL.1.cl.106.Contig2	5
SiJWD02ABF.scf	1
SiJWE04CAA.scf	1
SiJWC12BDS2.scf	1
SiJWH07ACH.scf	1
SiJWE04ADG.scf	1
SI.CL.21.cl.2160.Contig1	2
SI.CL.26.cl.2670.Contig1	3
SI.CL.1.cl.116.Contig2	3
SiJWF11AAP.scf	1
SiJWH12ABL.scf	1
SiJWG03BDF.scf	1
SiJWG02CAA.scf	1
SiJWD01BAV.scf	1
SiJWD11ADR.scf	1
SI.CL.2.cl.204.Contig1	2
SI.CL.39.cl.3969.Contig1	3
SiJWF08CAJ2.scf	1
SI.CL.4.cl.492.Contig1	5
SiJWF12ADK.scf	1
SiJWC07ABS.scf	1
SiJWG10BDY.scf	1
SiJWF01BDN2.scf	1
SiJWF06BDA2.scf	1
SiJWC09BDH.scf	1
SI.CL.11.cl.1145.Contig1	8
SiJWB12ACD.scf	1
SI.CL.4.cl.423.Contig1	3
SiJWB03AAJ.scf	1
SI.CL.25.cl.2597.Contig1	1
SI.CL.20.cl.2021.Contig1	2
SI.CL.43.cl.4313.Contig1	1
SI.CL.1.cl.120.Contig2	9
SiJWB02ABB.scf	1
SiJWB09ABF.scf	1
SiJWE06BBF.scf	1
SiJWB05ABC.scf	1
SiJWE07CAI2.scf	1
SI.CL.17.cl.1787.Contig1	2
SiJWE06BDX.scf	1
SiJWC06BAY2.scf	1
SiJWH02ACX.scf	1
SiJWD03AAN.scf	1
SI.CL.35.cl.3564.Contig1	1
SI.CL.34.cl.3482.Contig1	3
SiJWC11ACW.scf	1
SI.CL.5.cl.524.Contig1	4
SiJWA12ADP.scf	1
SI.CL.20.cl.2028.Contig1	7
SI.CL.23.cl.2345.Contig1	2
SI.CL.36.cl.3671.Contig1	2
SI.CL.33.cl.3337.Contig1	2
SI.CL.37.cl.3758.Contig1	2
SiJWA09BBH.scf	1
SiJWG04ABW.scf	1
SiJWB06AAG.scf	1
SiJWH11ACV.scf	1
SiJWC07BCM.scf	1
SiJWH11ADV.scf	1
SI.CL.5.cl.536.Contig1	2
SiJWF11BBX.scf	1
SI.CL.42.cl.4201.Contig1	2
SI.CL.12.cl.1232.Contig1	1
SI.CL.18.cl.1837.Contig1	2
SI.CL.14.cl.1438.Contig2	2
SiJWE10CAC2.scf	1
SiJWC11BDQR5C10.scf	1
SI.CL.3.cl.344.Contig1	10
SI.CL.36.cl.3660.Contig1	2
SiJWD06AAL.scf	1
SiJWD04ABY.scf	1
SI.CL.9.cl.986.Contig1	1
SI.CL.28.cl.2856.SiJWG06BDX.scf	1
SI.CL.41.cl.4123.Contig1	3
SiJWG11ABU.scf	1
SiJWE12CAN2.scf	1
SiJWA12CAG2.scf	1
SI.CL.2.cl.214.Contig1	4
SI.CL.2.cl.202.Contig1	1
SiJWA01BBD2.scf	1
SiJWF12CAX.scf	1
SiJWH08ADM.scf	1
SI.CL.39.cl.3924.Contig1	2
SI.CL.38.cl.3859.Contig1	3
SiJWH10BBS.scf	1
SiJWH06ADT.scf	1
SI.CL.25.cl.2573.Contig1	2
SiJWB02BDK2.scf	1
SI.CL.39.cl.3935.Contig1	2
SiJWF11BAQ.scf	1
SI.CL.18.cl.1839.SiJWD05BDV2.scf	1
SiJWA03AAV.scf	1
SiJWG01BAK.scf	1
SiJWE01ADX.scf	1
SiJWF05BBL.scf	1
SiJWC01BDM2.scf	1
SI.CL.19.cl.1901.Contig1	2
SI.CL.2.cl.207.Contig1	1
SI.CL.17.cl.1764.Contig1	3
SiJWH08BBM2.scf	1
SiJWG10CAX.scf	1
SiJWD12BAV.scf	1
SiJWE12BDW.scf	1
SI.CL.4.cl.420.Contig2	2
SiJWF02CAU2.scf	1
SiJWD01BAO.scf	1
SiJWF03BAU.scf	1
SiJWF10ABT.scf	1
SiJWG08CAI2.scf	1
SI.CL.7.cl.702.Contig1	7
SiJWD05CAI2.scf	1
SI.CL.0.cl.038.Contig1	11
SiJWE10ACS.scf	1
SI.CL.26.cl.2682.Contig1	6
SI.CL.0.cl.041.Contig1	11
SI.CL.0.cl.015.Contig1	3
SiJWH12ADK.scf	1
SI.CL.29.cl.2962.Contig1	2
SI.CL.24.cl.2407.SiJWA08BAP.scf	1
SiJWF08ABC.scf	1
SiJWF10AAB.scf	1
SiJWE07ABZII.scf	1
SI.CL.33.cl.3316.Contig1	3
SI.CL.2.cl.264.Contig2	8
SiJWF04BAA2.scf	1
SI.CL.36.cl.3680.Contig1	2
SI.CL.27.cl.2717.Contig1	3
SI.CL.5.cl.505.Contig1	3
SiJWB01BBU.scf	1
SI.CL.34.cl.3441.Contig1	2
SiJWF05BDT2.scf	1
SI.CL.32.cl.3273.Contig1	2
SI.CL.22.cl.2223.SiJWH06ADJ.scf	1
SI.CL.31.cl.3127.Contig1	2
SI.CL.37.cl.3753.Contig1	3
SiJWC09BBS.scf	1
SiJWE06BAR.scf	1
SI.CL.29.cl.2969.Contig1	1
SI.CL.9.cl.963.Contig1	1
SI.CL.25.cl.2550.Contig1	2
SiJWB02ACX.scf	1
SI.CL.28.cl.2834.Contig1	2
SiJWD03ABQ.scf	1
SI.CL.34.cl.3449.Contig1	2
SiJWD03ABE.tag5_D03_07.scf	1
SiJWC07ABB.scf	1
SI.CL.3.cl.379.SiJWE05BDZ.scf	1
SiJWF03AAB.scf	1
SiJWE08ADL.scf	1
SiJWF11BAD.scf	1
SiJWE01BCL2.scf	1
SI.CL.31.cl.3130.Contig1	2
SI.CL.24.cl.2456.SiJWA03BCC.tag5_A03_01.scf	1
SI.CL.41.cl.4142.Contig1	2
SI.CL.4.cl.493.Contig1	11
SI.CL.35.cl.3574.Contig1	2
SI.CL.38.cl.3896.Contig1	2
SiJWC07ADU.scf	1
SI.CL.29.cl.2920.Contig1	2
SI.CL.30.cl.3037.Contig1	2
SiJWH05ABK.scf	1
SiJWG03BAO.scf	1
SiJWB08BDL2.scf	1
SI.CL.12.cl.1291.Contig1	1
SI.CL.7.cl.791.Contig1	2
SI.CL.26.cl.2674.Contig1	2
SiJWD12ADC.scf	1
SI.CL.34.cl.3483.Contig1	2
SiJWC12ABI.scf	1
SiJWC07AAO.scf	1
SiJWF04BBJ2.scf	1
SI.CL.13.cl.1358.SiJWE12ABP2.scf	1
SI.CL.1.cl.179.Contig1	6
SI.CL.39.cl.3932.SiJWG02BDP.scf	1
SiJWA09ADF.scf	1
SI.CL.32.cl.3262.SiJWB05BDE2.scf	1
SiJWD12BAR.scf	1
SI.CL.2.cl.258.Contig1	4
SiJWG02BAG.scf	1
SiJWC03BAJ.scf	1
SI.CL.14.cl.1447.Contig1	3
SI.CL.23.cl.2350.Contig1	2
SiJWD11BCR.scf	1
SiJWH05BDX.scf	1
SiJWF11ADU.scf	1
SiJWC11CAU2.scf	1
SI.CL.14.cl.1423.SiJWA06AAP.scf	1
SiJWF07AAZ.scf	1
SiJWB10ADP.scf	1
SI.CL.42.cl.4210.Contig1	2
SiJWD08ABL.scf	1
SI.CL.30.cl.3057.Contig1	3
SI.CL.26.cl.2608.Contig1	4
SI.CL.32.cl.3228.Contig1	1
SI.CL.0.cl.084.Contig1	1
SI.CL.5.cl.503.Contig1	3
SiJWE06AAH.scf	1
SI.CL.15.cl.1573.Contig1	2
SI.CL.20.cl.2072.Contig1	2
SiJWH07BBI.scf	1
SI.CL.40.cl.4002.Contig1	3
SiJWE08CAA.scf	1
SiJWB08BCK2.scf	1
SI.CL.25.cl.2507.Contig1	3
SI.CL.4.cl.471.Contig1	2
SiJWA09CAA.scf	1
SiJWD11ADG.scf	1
SI.CL.24.cl.2459.SiJWG09ADT.scf	1
SI.CL.31.cl.3146.SiJWH11BBX.scf	1
SiJWC01ACK.scf	1
SI.CL.17.cl.1792.SiJWF01AAY.scf	1
SiJWH07ADU.scf	1
SiJWC01BCR.scf	1
SI.CL.21.cl.2132.Contig1	2
SiJWD05CAE.scf	1
SI.CL.18.cl.1809.SiJWE12CAR2.scf	1
SiJWC10BDD2.scf	1
SiJWD10ACC.scf	1
SiJWA08AAY.scf	1
SI.CL.36.cl.3677.SiJWH12AAA2.scf	1
SI.CL.15.cl.1552.Contig1	3
SI.CL.1.cl.122.SiJWG02ACG.scf	1
SiJWG05BDG.scf	1
SiJWD02AAQ.scf	1
SiJWG08CAV.scf	1
SI.CL.41.cl.4170.Contig1	3
SI.CL.5.cl.588.Contig1	2
SI.CL.0.cl.024.Contig1	4
SI.CL.41.cl.4130.Contig1	2
SiJWA12AAV.scf	1
SI.CL.17.cl.1795.SiJWG02AAY.scf	1
SiJWB06ADH.scf	1
SiJWE04BAB.scf	1
SiJWC02BAY2.scf	1
SI.CL.22.cl.2253.Contig1	2
SI.CL.34.cl.3487.Contig1	2
SI.CL.18.cl.1861.Contig1	2
SiJWG07ACG.scf	1
SI.CL.32.cl.3229.Contig1	2
SiJWH08ACT.scf	1
SI.CL.13.cl.1339.Contig1	2
SiJWG01BCC.tag5_G01_13.scf	1
SI.CL.18.cl.1800.Contig1	1
SiJWC05AAF2.scf	1
SiJWE02ACK.scf	1
SiJWB06BDJ.scf	1
SI.CL.22.cl.2202.Contig1	2
SI.CL.19.cl.1922.Contig1	2
SI.CL.21.cl.2162.Contig1	4
SiJWB02AAL.scf	1
SI.CL.37.cl.3798.Contig1	2
SiJWC09BCC.tag5_C09_05.scf	1
SI.CL.26.cl.2653.Contig1	2
SiJWA06AAY.scf	1
SI.CL.4.cl.430.Contig2	5
SiJWA10BCF2.scf	1
SI.CL.40.cl.4067.SiJWG09BAW2.scf	1
SiJWF01BBI.scf	1
SI.CL.23.cl.2303.Contig1	2
SI.CL.1.cl.161.Contig1	1
SiJWC10AAO.scf	1
SiJWC04BBA.scf	1
SiJWF12AAD.scf	1
SI.CL.28.cl.2834.Contig2	2
SiJWE07ACW.scf	1
SI.CL.11.cl.1120.SiJWB01BBR.scf	1
SiJWB12CAM2.scf	1
SiJWA12ADI.scf	1
SI.CL.1.cl.150.Contig1	4
SI.CL.29.cl.2909.Contig1	8
SiJWG03BAJ.scf	1
SiJWG06CAI2.scf	1
SiJWD10CAO2.scf	1
SiJWD10ABI.scf	1
SiJWE11ACU.scf	1
SiJWD10AAA2.scf	1
SI.CL.7.cl.737.Contig1	4
SI.CL.3.cl.391.Contig1	1
SiJWA10CAB.scf	1
SI.CL.17.cl.1771.Contig1	2
SiJWA06ADJ.scf	1
SiJWC11BBR.scf	1
SI.CL.4.cl.451.Contig1	1
SI.CL.5.cl.538.Contig1	2
SiJWH04BCP2.scf	1
SI.CL.7.cl.784.Contig3	1
SI.CL.38.cl.3838.Contig1	5
SiJWG12ABM.scf	1
SI.CL.42.cl.4278.SiJWE12CAT2.scf	1
SI.CL.14.cl.1430.SiJWF03BCJ3.scf	1
SiJWB05ACU.scf	1
SI.CL.26.cl.2639.Contig1	3
SI.CL.39.cl.3940.Contig1	2
SI.CL.14.cl.1444.SiJWF09AAP.scf	1
SI.CL.15.cl.1527.Contig1	2
SiJWA03BAL.scf	1
SiJWC12AAV.scf	1
SI.CL.15.cl.1542.Contig1	2
SI.CL.26.cl.2690.Contig1	2
SI.CL.31.cl.3191.Contig1	1
SiJWA11AAU.scf	1
SI.CL.8.cl.861.SiJWG09ACO.scf	1
SI.CL.5.cl.565.Contig1	2
SiJWB12ADE.scf	1
SI.CL.28.cl.2864.SiJWG05BBX.scf	1
SI.CL.21.cl.2166.SiJWD03CAT2.scf	1
SiJWG04BBA.scf	1
SI.CL.23.cl.2339.Contig1	4
SI.CL.16.cl.1641.Contig1	2
SI.CL.40.cl.4012.Contig1	4
SI.CL.38.cl.3863.Contig1	2
SiJWC08ABB.scf	1
SiJWB12BDB2.scf	1
SI.CL.16.cl.1644.Contig2	3
SI.CL.41.cl.4161.Contig1	2
SI.CL.41.cl.4121.Contig1	3
SiJWA07ADS.scf	1
SI.CL.1.cl.114.Contig1	1
SI.CL.23.cl.2370.Contig1	1
SI.CL.1.cl.116.SiJWD04BDN2.scf	1
SI.CL.2.cl.233.Contig4	2
SI.CL.37.cl.3754.Contig1	2
SI.CL.23.cl.2388.Contig1	2
SiJWD11ABF.scf	1
SiJWE07AAW.scf	1
SI.CL.34.cl.3423.Contig1	2
SiJWB05AAM.scf	1
SI.CL.26.cl.2605.Contig1	2
SI.CL.13.cl.1350.Contig1	1
SI.CL.18.cl.1828.Contig1	7
SI.CL.4.cl.414.SiJWG02BCB2.scf	1
SiJWB11ABK.scf	1
SiJWA09CAM2.scf	1
SI.CL.21.cl.2128.Contig1	3
SiJWG06BBI.scf	1
SiJWD07ADO.scf	1
SiJWG05ACT.scf	1
SI.CL.3.cl.362.SiJWA08CAJ2.scf	1
SiJWD01AAE.tag5_D01_07.scf	1
SI.CL.10.cl.1031.Contig2	2
SiJWG03BBS.scf	1
SiJWG08ABT.scf	1
SiJWH06ADP.scf	1
SI.CL.33.cl.3344.SiJWE10BCW2.scf	1
SiJWB08CAU2.scf	1
SI.CL.38.cl.3853.Contig2	2
SI.CL.28.cl.2844.Contig1	1
SI.CL.23.cl.2390.Contig1	3
SiJWF10AAT.scf	1
SiJWF10BDF.scf	1
SI.CL.29.cl.2941.SiJWE07BBH.scf	1
SI.CL.25.cl.2556.Contig2	5
SI.CL.10.cl.1074.SiJWH03BCJ2.scf	1
SiJWC08BAN.scf	1
SiJWF09BDG.scf	1
SiJWE10AAZ.scf	1
SiJWB07AAN.scf	1
SI.CL.24.cl.2438.Contig1	3
SI.CL.26.cl.2621.Contig1	1
SiJWH09AAW.scf	1
SiJWC12ACA.scf	1
SiJWE08CAT2.scf	1
SiJWA01ADS.scf	1
SI.CL.25.cl.2526.SiJWA02BAY2.scf	1
SiJWG03AAC2.scf	1
SI.CL.2.cl.212.SiJWB03ADB.scf	1
SiJWC11BAE.scf	1
SI.CL.25.cl.2512.SiJWG05ACY.scf	1
SI.CL.0.cl.037.SiJWH03BDO2.scf	1
SiJWE01BDF.scf	1
SiJWD02AAH.scf	1
SiJWH03BBZ.scf	1
SI.CL.39.cl.3960.Contig1	3
SiJWF04CAK2.scf	1
SiJWG12BBK.scf	1
SI.CL.29.cl.2923.Contig1	4
SI.CL.30.cl.3081.Contig1	2
SiJWB02ADL.scf	1
SI.CL.10.cl.1016.Contig1	3
SiJWC12ADK.scf	1
SI.CL.28.cl.2887.Contig1	2
SI.CL.35.cl.3588.Contig1	2
SI.CL.11.cl.1140.Contig1	4
SI.CL.35.cl.3517.Contig1	2
SI.CL.34.cl.3403.Contig1	3
SiJWA12ABO.scf	1
SI.CL.5.cl.500.Contig1	3
SI.CL.34.cl.3455.Contig1	2
SiJWA09ADZ.scf	1
SiJWF03ACN.scf	1
SI.CL.19.cl.1964.SiJWF06AAL.scf	1
SI.CL.20.cl.2064.Contig1	1
SI.CL.9.cl.942.SiJWC09ADD.scf	1
SI.CL.28.cl.2812.SiJWE11BAP.scf	1
SiJWB09ADJ.scf	1
SiJWH06BAK.scf	1
SiJWE04ABN.scf	1
SI.CL.2.cl.297.Contig1	1
SI.CL.3.cl.313.Contig1	5
SI.CL.35.cl.3587.Contig1	2
SI.CL.10.cl.1064.Contig1	7
SiJWA05BCS2.scf	1
SI.CL.4.cl.430.SiJWH03BAB.scf	1
SiJWH03AA1_evro_H10_3prime.scf	1
SiJWE04CAR2.scf	1
SI.CL.24.cl.2492.Contig1	2
SiJWD08ABD.scf	1
SI.CL.22.cl.2298.SiJWA10AEA.scf	1
SI.CL.35.cl.3577.Contig1	2
SI.CL.39.cl.3981.Contig2	2
SI.CL.14.cl.1467.Contig1	3
SI.CL.34.cl.3414.Contig1	2
SI.CL.0.cl.051.Contig1	24
SI.CL.29.cl.2933.Contig1	2
SiJWE07AAC2.scf	1
SI.CL.24.cl.2497.Contig1	2
SI.CL.18.cl.1860.Contig1	2
SiJWB11CAJ2.scf	1
SiJWF07BAK.scf	1
SiJWA05CAB.scf	1
SiJWH04BDN2.scf	1
SiJWA09BCH2.scf	1
SI.CL.9.cl.928.Contig1	3
SiJWF09BCV.scf	1
SI.CL.27.cl.2730.Contig1	2
SiJWB07ADF.scf	1
SiJWF04ADP.scf	1
SiJWA09CAT2.scf	1
SiJWE05BBD2.scf	1
SI.CL.30.cl.3002.SiJWC06BBZ.scf	1
SiJWA06CAK2.scf	1
SiJWG01ABA.scf	1
SI.CL.0.cl.065.Contig5	21
SI.CL.3.cl.323.Contig1	2
SiJWA01BAQ.scf	1
SI.CL.15.cl.1500.Contig1	2
SI.CL.8.cl.898.Contig1	8
SiJWG09BBI.scf	1
SI.CL.25.cl.2537.Contig1	1
SiJWH10BBA.scf	1
SI.CL.3.cl.307.Contig1	3
SiJWA06ADT.scf	1
SiJWA01BDW.scf	1
SI.CL.25.cl.2500.Contig1	5
SiJWG06BBR.scf	1
SI.CL.16.cl.1666.Contig1	2
SI.CL.2.cl.233.Contig2	2
SI.CL.27.cl.2753.Contig1	2
SiJWG09BCS2.scf	1
SI.CL.16.cl.1617.Contig1	2
SiJWD07AEA.scf	1
SI.CL.10.cl.1069.Contig1	12
SiJWC08AA1.tag5_C08_06.scf	1
SiJWA10BBE.scf	1
SI.CL.1.cl.162.SiJWG05BAQ.scf	1
SiJWA11ACB.scf	1
SiJWG12AAY.scf	1
SiJWE08ACG.scf	1
SiJWA04BCF.scf	1
SI.CL.30.cl.3049.Contig1	2
SiJWC05BEA.scf	1
SiJWE05ADO.scf	1
SiJWF01AAZ.scf	1
SiJWH07BAF.scf	1
SI.CL.0.cl.021.Contig1	2
SiJWB08CAI2.scf	1
SI.CL.0.cl.002.SiJWB06ACI.scf	1
SI.CL.12.cl.1283.Contig1	1
SI.CL.39.cl.3916.Contig1	2
SiJWF07ADN.scf	1
SI.CL.8.cl.823.Contig1	3
SI.CL.14.cl.1407.Contig1	2
SiJWD03ACL.scf	1
SiJWG07BAZ2.scf	1
SI.CL.29.cl.2958.Contig1	4
SiJWF05BDJ.scf	1
SI.CL.24.cl.2440.Contig1	1
SiJWG01AAK.scf	1
SiJWH04BDM2.scf	1
SiJWG12AAQ.scf	1
SI.CL.5.cl.518.Contig1	3
SiJWB04AAX.scf	1
SI.CL.10.cl.1027.Contig1	3
SiJWG03BDV2.scf	1
SI.CL.34.cl.3480.Contig1	3
SI.CL.36.cl.3622.Contig1	5
SiJWF04CAN2.scf	1
SI.CL.35.cl.3541.Contig1	2
SI.CL.41.cl.4143.SiJWE05BCI2.scf	1
SI.CL.24.cl.2403.Contig1	2
SI.CL.30.cl.3043.Contig1	1
SiJWD04ADD.scf	1
SI.CL.40.cl.4061.Contig1	2
SI.CL.37.cl.3701.Contig1	2
SiJWB12BCU2.scf	1
SI.CL.13.cl.1336.Contig1	2
SiJWD11ABP2.scf	1
SiJWD12ABI.scf	1
SI.CL.17.cl.1762.Contig1	2
SiJWA10BCB2.scf	1
SI.CL.26.cl.2654.SiJWG03BDD2.scf	1
SiJWA06CAD.scf	1
SiJWD04CAU2.scf	1
SI.CL.41.cl.4154.Contig1	2
SI.CL.29.cl.2905.Contig1	1
SiJWF07CAV.scf	1
SI.CL.21.cl.2115.Contig1	5
SiJWA08BBX.scf	1
SI.CL.30.cl.3056.SiJWA09AAA2.scf	1
SI.CL.3.cl.300.Contig1	2
SiJWH05AAD.scf	1
SI.CL.40.cl.4015.Contig1	2
SI.CL.41.cl.4106.SiJWC05BCA2.scf	1
SiJWF02BCR.scf	1
SI.CL.39.cl.3909.Contig1	2
SI.CL.8.cl.855.Contig1	4
SI.CL.1.cl.150.SiJWE10AAD.scf	1
SiJWE12AAU.scf	1
SI.CL.29.cl.2938.Contig1	3
SiJWH06BCI2.scf	1
SiJWA06CAM.scf	1
SI.CL.1.cl.173.Contig3	6
SI.CL.9.cl.982.Contig1	5
SI.CL.19.cl.1986.Contig1	4
SiJWB12BAY2.scf	1
SI.CL.15.cl.1548.SiJWB02BCX2.scf	1
SiJWB04ADQ.scf	1
SI.CL.16.cl.1681.Contig1	4
SiJWA09BAV.scf	1
SiJWF08BAS.scf	1
SiJWE01BCB2.scf	1
SiJWG06BAQ.scf	1
SiJWG08AAE.tag5_G08_14.scf	1
SI.CL.41.cl.4124.Contig1	3
SI.CL.9.cl.978.Contig1	9
SiJWD04BAP.scf	1
SI.CL.14.cl.1437.SiJWF12CAC2.scf	1
SiJWB08BCL2.scf	1
SiJWH04BAN.scf	1
SI.CL.4.cl.480.Contig1	7
SiJWB03BAX.scf	1
SI.CL.4.cl.403.SiJWF04BCJ5.scf	1
SiJWB09BBB.scf	1
SI.CL.10.cl.1038.Contig1	4
SI.CL.1.cl.192.Contig1	6
SI.CL.30.cl.3044.Contig1	2
SiJWD03AAY.scf	1
SI.CL.5.cl.549.Contig1	2
SI.CL.4.cl.432.Contig1	2
SiJWE02ADV.scf	1
SI.CL.18.cl.1839.Contig2	1
SiJWH01AAA.scf	1
SI.CL.25.cl.2574.Contig1	2
SiJWD05BCB2.scf	1
SI.CL.17.cl.1753.Contig1	3
SI.CL.25.cl.2526.SiJWH03BAD.scf	1
SiJWH11ADI.scf	1
SiJWF08BAQ.scf	1
SiJWE01BEA.scf	1
SI.CL.27.cl.2754.Contig2	3
SI.CL.34.cl.3424.Contig1	4
SI.CL.6.cl.612.Contig1	5
SI.CL.4.cl.498.Contig1	4
SiJWD03BAR.scf	1
SI.CL.1.cl.194.SiJWE06ACT.scf	1
SiJWA03ACM.scf	1
SI.CL.34.cl.3471.Contig1	2
SiJWB07ADX.scf	1
SiJWC02AAN.scf	1
SI.CL.27.cl.2720.Contig1	3
SI.CL.20.cl.2067.SiJWA11BAQ.scf	1
SI.CL.32.cl.3263.Contig1	2
SiJWG11CAU2.scf	1
SI.CL.0.cl.030.Contig1	5
SiJWG02BBS.scf	1
SiJWB07AAS.scf	1
SI.CL.34.cl.3493.Contig1	2
SiJWG09ACD.scf	1
SI.CL.3.cl.356.Contig3	5
SiJWF05ACQ.scf	1
SI.CL.0.cl.005.Contig1	15
SiJWF11AAH.scf	1
SI.CL.36.cl.3651.Contig1	2
SiJWB04AAR.scf	1
SiJWH04BBS.scf	1
SiJWD06ABF.scf	1
SiJWB07AAZ.scf	1
SI.CL.32.cl.3219.Contig1	2
SiJWE02CAD.scf	1
SI.CL.3.cl.379.Contig1	2
SiJWA01BBP.scf	1
SiJWE07BCO2.scf	1
SiJWB04BDHR4H04.scf	1
SI.CL.3.cl.386.SiJWD04ACB.scf	1
SI.CL.29.cl.2978.Contig1	1
SiJWB01ADR.scf	1
SI.CL.31.cl.3173.Contig1	3
SI.CL.1.cl.105.SiJWD01ADB.scf	1
SiJWA04BAK.scf	1
SI.CL.4.cl.443.Contig1	6
SI.CL.16.cl.1671.Contig1	2
SI.CL.21.cl.2181.Contig1	3
SiJWH03CAD.scf	1
SiJWH08CAL2.scf	1
SI.CL.42.cl.4257.Contig1	2
SI.CL.24.cl.2414.Contig1	3
SiJWF05AA1.tag5_F05_11.scf	1
SI.CL.4.cl.403.Contig3	1
SI.CL.11.cl.1142.Contig1	2
SI.CL.26.cl.2676.Contig1	4
SI.CL.21.cl.2158.SiJWD05ADG.scf	1
SiJWC06CAS2.scf	1
SiJWD09ADB.scf	1
SI.CL.0.cl.048.Contig1	3
SI.CL.1.cl.197.Contig1	2
SI.CL.11.cl.1143.Contig1	3
SiJWH04ADN.scf	1
SiJWC02BBE.scf	1
SiJWF06BBS.scf	1
SI.CL.31.cl.3158.SiJWC04BBS.scf	1
SiJWG08ABF.scf	1
SiJWH03ADK.scf	1
SI.CL.3.cl.382.Contig1	3
SiJWA06BAX.scf	1
SiJWB11CAU2.scf	1
SI.CL.10.cl.1075.Contig2	4
SiJWG02ACB.scf	1
SiJWE03AAU.scf	1
SiJWF03ADK.scf	1
SiJWA06BCV.scf	1
SiJWA03BDU2.scf	1
SI.CL.20.cl.2023.Contig1	2
SI.CL.1.cl.149.SiJWD11ABY.scf	1
SiJWD01ABY.scf	1
SI.CL.42.cl.4284.Contig1	4
SiJWA05ACS.scf	1
SiJWD06AAG.scf	1
SiJWC07BBZ.scf	1
SiJWC12BDI2.scf	1
SI.CL.3.cl.347.SiJWE08BDU2.scf	1
SI.CL.0.cl.070.SiJWA08ABW.scf	1
SI.CL.2.cl.203.Contig1	1
SI.CL.14.cl.1423.SiJWE06ABK.scf	1
SI.CL.5.cl.557.Contig1	9
SiJWB11BDW.scf	1
SiJWA07ABX.scf	1
SI.CL.28.cl.2874.SiJWA08BCI2.scf	1
SiJWA08BCRR3E01.scf	1
SiJWC09ADP.scf	1
SI.CL.2.cl.243.Contig1	8
SiJWD07CAC2.scf	1
SI.CL.13.cl.1358.SiJWF02BCJ5.scf	1
SiJWD06ADV.scf	1
SI.CL.30.cl.3095.Contig1	3
SiJWG07ACU.scf	1
SiJWC06ACF.scf	1
SiJWB03BAN.scf	1
SI.CL.1.cl.108.SiJWC10ADB.scf	1
SI.CL.31.cl.3107.Contig1	2
SiJWG12BAW2.scf	1
SiJWD12ABV.scf	1
SiJWF07ADW.scf	1
SiJWD07ABG.scf	1
SI.CL.21.cl.2190.Contig1	2
SiJWB04BBJ2.scf	1
SI.CL.0.cl.078.Contig1	3
SiJWA12BBC2.scf	1
SI.CL.26.cl.2660.Contig1	1
SiJWF01BAM.scf	1
SiJWG10ABU.scf	1
SI.CL.30.cl.3040.Contig1	2
SI.CL.9.cl.984.Contig1	5
SI.CL.38.cl.3895.Contig1	2
SiJWF03ADB.scf	1
SiJWG06ADS.scf	1
SiJWA12ABV.scf	1
SiJWH10BAK.scf	1
SiJWC07BCZ2.scf	1
SiJWG06ABC.scf	1
SI.CL.12.cl.1216.SiJWH02AAQ.scf	1
SiJWG06CAE.scf	1
SI.CL.23.cl.2333.Contig1	4
SiJWD10CAK2.scf	1
SI.CL.43.cl.4308.Contig1	2
SI.CL.19.cl.1965.SiJWE05BBR.scf	1
SiJWD06CAM.scf	1
SiJWF04ACC.scf	1
SiJWE11ADH.scf	1
SI.CL.19.cl.1905.Contig1	3
SiJWE08ADT.scf	1
SI.CL.3.cl.325.Contig1	2
SiJWG09ACI.scf	1
SI.CL.12.cl.1207.Contig1	3
SI.CL.0.cl.028.Contig1	2
SiJWB02ACV.scf	1
SI.CL.5.cl.595.SiJWA05AAB.scf	1
SI.CL.5.cl.539.Contig1	6
SI.CL.11.cl.1120.SiJWF03BBY.scf	1
SiJWH07BCH2.scf	1
SI.CL.20.cl.2041.Contig1	2
SiJWB03BBB.scf	1
SiJWA06ACB.scf	1
SiJWA11BBG.scf	1
SiJWC04BBI.scf	1
SI.CL.37.cl.3713.Contig1	3
SiJWA08ABS.scf	1
SiJWD07BDX.scf	1
SI.CL.5.cl.528.Contig1	2
SiJWC03AAT.scf	1
SI.CL.30.cl.3035.Contig1	2
SI.CL.12.cl.1256.SiJWE06BDG.scf	1
SiJWE01BBU.scf	1
SI.CL.17.cl.1758.SiJWE06CAE.scf	1
SI.CL.31.cl.3152.SiJWH11CAI2.scf	1
SI.CL.16.cl.1657.Contig1	2
SiJWB01ABW.scf	1
SI.CL.23.cl.2332.SiJWG08ADA.scf	1
SI.CL.24.cl.2461.Contig1	2
SiJWH02ACN.scf	1
SI.CL.0.cl.083.Contig1	1
SI.CL.6.cl.663.Contig1	7
SiJWF11AAM.scf	1
SiJWA01ADY.scf	1
SiJWF11CAC2.scf	1
SI.CL.10.cl.1071.SiJWE07BDR2.scf	1
SI.CL.17.cl.1756.Contig1	2
SiJWC06AAO.scf	1
SI.CL.11.cl.1194.Contig1	1
SI.CL.38.cl.3839.SiJWE09BCJ.scf	1
SI.CL.4.cl.477.SiJWG10AAB.scf	1
SiJWC09BCK2.scf	1
SiJWF08BDH.scf	1
SI.CL.6.cl.650.SiJWA12BDJR4G11.scf	1
SiJWH09BBL.scf	1
SI.CL.22.cl.2277.SiJWA03ADY.scf	1
SiJWC09ACQ.scf	1
SiJWF11CAP.scf	1
SI.CL.34.cl.3425.Contig1	2
SI.CL.27.cl.2754.SiJWH06BBI.scf	1
SI.CL.2.cl.212.SiJWF02BAK.scf	1
SI.CL.13.cl.1334.Contig2	4
SI.CL.1.cl.184.Contig4	3
SI.CL.40.cl.4032.Contig1	2
SI.CL.8.cl.873.Contig1	3
SiJWA12BDI2.scf	1
SI.CL.18.cl.1886.Contig1	7
SI.CL.3.cl.385.Contig1	4
SI.CL.34.cl.3477.Contig1	2
SI.CL.15.cl.1581.Contig1	2
SiJWE05ABT.scf	1
SiJWB06ACD.scf	1
SiJWA04CAQ2.scf	1
SI.CL.16.cl.1673.Contig1	4
SiJWC12ADU.scf	1
SiJWC03BAP.scf	1
SiJWC12CAA.scf	1
SI.CL.11.cl.1125.SiJWF09BCR.scf	1
SI.CL.39.cl.3901.Contig1	2
SiJWF11BDY.scf	1
SiJWC02ACA.scf	1
SiJWF12ABG.scf	1
SiJWB06BCA2.scf	1
SiJWC08ADY.scf	1
SI.CL.26.cl.2641.Contig1	2
SiJWD10AAS.scf	1
SiJWG10ADR.scf	1
SiJWC05ABL.scf	1
SiJWC04ACW.scf	1
SI.CL.8.cl.848.Contig1	5
SI.CL.1.cl.199.Contig2	1
SI.CL.25.cl.2517.SiJWB07ABB.scf	1
SiJWC01BAZ2.scf	1
SiJWG02ABM.scf	1
SI.CL.6.cl.696.Contig1	2
SI.CL.35.cl.3527.Contig1	2
SI.CL.36.cl.3690.Contig1	2
SiJWC05BDD2.scf	1
SiJWC04ADD.scf	1
SiJWH11AAQ.scf	1
SiJWE04CAV.scf	1
SI.CL.26.cl.2692.Contig1	3
SI.CL.12.cl.1259.Contig1	4
SiJWG07BBY.scf	1
SI.CL.26.cl.2635.Contig1	2
SiJWB12ABV.scf	1
SiJWA10ACV.scf	1
SI.CL.17.cl.1754.Contig1	2
SiJWE07AAT.scf	1
SiJWE07ABJ.scf	1
SI.CL.16.cl.1682.Contig1	1
SiJWB01AAQ.scf	1
SiJWB04BAZ2.scf	1
SiJWG08ABH.scf	1
SI.CL.8.cl.856.Contig1	5
SiJWA11ADJ.scf	1
SiJWC07ACP.scf	1
SI.CL.28.cl.2846.Contig1	2
SI.CL.39.cl.3908.Contig1	2
SiJWH07ABW.scf	1
SI.CL.10.cl.1095.Contig1	8
SI.CL.3.cl.346.Contig2	2
SI.CL.10.cl.1052.Contig1	2
SiJWC08CAP.scf	1
SiJWA01ACE.scf	1
SI.CL.11.cl.1185.Contig1	4
SI.CL.9.cl.995.Contig1	3
SI.CL.23.cl.2312.Contig1	2
SiJWG07BDQ.scf	1
SiJWA01BCY2.scf	1
SI.CL.10.cl.1078.SiJWC11BCP2.scf	1
SiJWC06ABB.scf	1
SI.CL.22.cl.2210.Contig1	2
SiJWB03AAO.scf	1
SI.CL.22.cl.2242.Contig1	2
SI.CL.12.cl.1286.Contig1	2
SiJWG09BBP.scf	1
SiJWH09ADX.scf	1
SI.CL.30.cl.3086.Contig1	2
SI.CL.39.cl.3929.Contig1	2
SiJWH02BAK.scf	1
SI.CL.10.cl.1017.Contig1	2
SI.CL.0.cl.044.Contig1	5
SI.CL.41.cl.4150.Contig1	2
SiJWF03AAX.scf	1
SI.CL.21.cl.2103.Contig1	2
SiJWB08AAR.scf	1
SiJWH02BBB.scf	1
SiJWD10BBO2.scf	1
SI.CL.32.cl.3216.Contig1	1
SI.CL.17.cl.1781.Contig1	6
SiJWB06AAW.scf	1
SiJWE05BBC2.scf	1
SI.CL.6.cl.616.Contig1	1
SI.CL.14.cl.1426.SiJWA12BBO2.scf	1
SiJWB11ABM.scf	1
SiJWA05BCQ.tag5_A05_01.scf	1
SI.CL.28.cl.2821.Contig1	2
SI.CL.39.cl.3976.Contig1	2
SiJWA10BAC.scf	1
SiJWD11ADQ.scf	1
SiJWC03ABU.scf	1
SI.CL.17.cl.1707.Contig1	2
SI.CL.27.cl.2798.Contig1	6
SiJWD05BCK2.scf	1
SiJWD08AAN.scf	1
SiJWG02CAI2.scf	1
SiJWD10BAB.scf	1
SI.CL.2.cl.240.Contig1	6
SI.CL.36.cl.3653.Contig1	2
SI.CL.26.cl.2625.SiJWB03BAE.scf	1
SI.CL.28.cl.2859.Contig1	2
SiJWB07BBV2.scf	1
SI.CL.14.cl.1429.Contig1	2
SiJWA06AAM.scf	1
SI.CL.10.cl.1084.Contig1	2
SiJWD04AAX.scf	1
SiJWE09BDZ.scf	1
SI.CL.15.cl.1563.Contig1	2
SI.CL.14.cl.1454.Contig1	4
SiJWC09BBU.scf	1
SiJWG02BAT.scf	1
SI.CL.38.cl.3847.Contig1	2
SI.CL.22.cl.2261.SiJWB08ADX.scf	1
SiJWC04AAN.scf	1
SiJWF03BDG.scf	1
SI.CL.21.cl.2169.Contig1	3
SiJWH06ACN.scf	1
SiJWB03BCA2.scf	1
SI.CL.7.cl.783.SiJWE12BBR.scf	1
SI.CL.4.cl.403.SiJWB12ADT.scf	1
SI.CL.27.cl.2737.SiJWE04AAW.scf	1
SI.CL.36.cl.3683.Contig1	2
SI.CL.43.cl.4301.Contig1	3
SI.CL.14.cl.1421.Contig1	2
SiJWA10ACP.scf	1
SiJWD08ABT.scf	1
SI.CL.20.cl.2079.Contig1	7
SiJWA01BDC2.scf	1
SI.CL.10.cl.1029.Contig1	2
SiJWH10BCU2.scf	1
SI.CL.15.cl.1519.SiJWD01AAZ.scf	1
SI.CL.0.cl.018.Contig1	2
SI.CL.16.cl.1663.Contig1	3
SiJWB12BBP.scf	1
SI.CL.10.cl.1021.SiJWD03BCE2.scf	1
SiJWD04ADT.scf	1
SiJWG01ADY.scf	1
SiJWB12CAK2.scf	1
SiJWE05CAE.scf	1
SI.CL.2.cl.283.Contig1	6
SiJWH03CAF2.scf	1
SI.CL.3.cl.394.Contig1	1
SiJWA04BAG.scf	1
SiJWA03ACW.scf	1
SI.CL.4.cl.485.Contig2	4
SI.CL.9.cl.933.Contig1	2
SI.CL.20.cl.2018.SiJWD03ADZ.scf	1
SiJWC08ABU.scf	1
SI.CL.42.cl.4283.Contig1	1
SI.CL.2.cl.291.Contig2	5
SI.CL.1.cl.170.Contig1	10
SiJWF08ADO.scf	1
SI.CL.5.cl.568.Contig1	3
SiJWH08CAC2.scf	1
SI.CL.4.cl.485.SiJWE05AAO.scf	1
SI.CL.39.cl.3955.Contig1	2
SI.CL.29.cl.2991.Contig1	4
SI.CL.2.cl.238.Contig2	1
SI.CL.0.cl.022.Contig1	4
SI.CL.39.cl.3996.Contig1	2
SI.CL.41.cl.4151.Contig1	1
SI.CL.37.cl.3796.Contig1	2
SI.CL.40.cl.4090.SiJWB08BBJ2.scf	1
SiJWF05BBO2.scf	1
SI.CL.16.cl.1644.Contig1	1
SI.CL.32.cl.3255.Contig1	2
SiJWA03CAA.scf	1
SiJWG10ADZ.scf	1
SiJWB07BAJ.scf	1
SiJWE03BAA2.scf	1
SiJWE09ACM.scf	1
SI.CL.4.cl.431.Contig1	2
SI.CL.29.cl.2994.Contig1	1
SI.CL.1.cl.194.Contig3	16
SI.CL.36.cl.3673.Contig1	2
SI.CL.12.cl.1213.SiJWG01AAQ.scf	1
SiJWA01BBX.scf	1
SI.CL.27.cl.2746.Contig1	3
SiJWE09AAZ.scf	1
SiJWH11BBE.scf	1
SI.CL.22.cl.2279.Contig1	4
SiJWD11ACK.scf	1
SI.CL.34.cl.3406.Contig1	2
SI.CL.6.cl.682.Contig1	2
SiJWF09ADE.scf	1
SI.CL.16.cl.1601.Contig1	2
SI.CL.30.cl.3077.Contig1	2
SI.CL.21.cl.2182.SiJWG06ADH.scf	1
SI.CL.26.cl.2633.Contig1	3
SiJWG04AAM.scf	1
SI.CL.10.cl.1086.Contig1	2
SI.CL.31.cl.3145.Contig1	2
SiJWD06BAE.scf	1
SiJWH06BDL2.scf	1
SiJWE01ABQ.scf	1
SI.CL.41.cl.4191.Contig1	2
SiJWC05BAY2.scf	1
SI.CL.28.cl.2825.Contig1	2
SiJWB11ABT.scf	1
SI.CL.29.cl.2929.Contig1	2
SI.CL.32.cl.3210.Contig1	3
SI.CL.8.cl.890.Contig1	3
SI.CL.15.cl.1505.Contig1	2
SI.CL.13.cl.1306.SiJWD11CAR2.scf	1
SiJWE01AAI.scf	1
SiJWC11AAY.scf	1
SI.CL.28.cl.2819.Contig1	1
SI.CL.42.cl.4250.Contig1	2
SiJWH03ABQ.scf	1
SiJWG03BDM2.scf	1
SI.CL.30.cl.3008.SiJWE11BDI2.scf	1
SiJWH04ACF.scf	1
SI.CL.8.cl.827.Contig1	2
SI.CL.17.cl.1740.Contig1	2
SiJWD05ACW.scf	1
SI.CL.25.cl.2530.Contig1	2
SI.CL.27.cl.2726.Contig1	1
SI.CL.22.cl.2266.SiJWH03CAR2.scf	1
SI.CL.12.cl.1218.Contig1	2
SI.CL.20.cl.2058.Contig1	2
SI.CL.39.cl.3964.Contig1	3
SI.CL.1.cl.162.Contig2	6
SiJWG01BAX.scf	1
SI.CL.13.cl.1380.SiJWB05ADY.scf	1
SiJWG09BDJ.scf	1
SI.CL.27.cl.2713.Contig1	2
SiJWB08AAT.scf	1
SI.CL.22.cl.2213.Contig2	1
SiJWD10ADU.scf	1
SI.CL.11.cl.1176.Contig1	4
SiJWC12ACT.scf	1
SI.CL.12.cl.1256.Contig1	2
SI.CL.17.cl.1767.Contig1	1
SiJWC12BDL2.scf	1
SiJWE05ADX.scf	1
SI.CL.5.cl.561.SiJWG02BDJ.scf	1
SI.CL.20.cl.2048.SiJWH06CAS2.scf	1
SI.CL.10.cl.1024.Contig2	3
SiJWA03BAC.scf	1
SiJWD06CAT2.scf	1
SiJWE02BDP.scf	1
SI.CL.3.cl.306.Contig1	8
SiJWB11BAG.scf	1
SiJWA02BAK.scf	1
SI.CL.17.cl.1789.Contig2	2
SI.CL.4.cl.497.Contig1	3
SiJWE05ADF.scf	1
SiJWB01CAN2.scf	1
SI.CL.12.cl.1217.Contig1	2
SI.CL.19.cl.1908.Contig1	6
SiJWE01BAM.scf	1
SI.CL.14.cl.1469.Contig1	2
SiJWE10ACY.scf	1
SiJWC07BAK.scf	1
SI.CL.0.cl.039.SiJWH12CAV.scf	1
SiJWG10ADL.scf	1
SiJWH05AAW.scf	1
SiJWC06BAK.scf	1
SiJWD04ACP.scf	1
SiJWB09CAV.scf	1
SiJWD10AAK.scf	1
SiJWG08ADG.scf	1
SI.CL.2.cl.207.SiJWB09ACE.SP6.scf	1
SI.CL.22.cl.2209.Contig1	2
SI.CL.17.cl.1789.SiJWG08BCV.scf	1
SiJWF04ADB.scf	1
SI.CL.30.cl.3008.SiJWA11BAT.scf	1
SI.CL.24.cl.2445.Contig1	2
SI.CL.34.cl.3481.Contig1	1
SiJWE06AAA.scf	1
SI.CL.14.cl.1433.Contig1	2
SiJWH02BCR.scf	1
SI.CL.26.cl.2658.Contig1	2
SI.CL.36.cl.3650.Contig1	2
SiJWA10BAT.scf	1
SiJWA01ADC.scf	1
SiJWC05CAA.scf	1
SI.CL.17.cl.1710.Contig1	3
SiJWD10ACJ.scf	1
SI.CL.38.cl.3816.Contig1	2
SiJWF07BAZ2.scf	1
SI.CL.14.cl.1484.SiJWG08BDB2.scf	1
SI.CL.15.cl.1575.Contig1	2
SI.CL.6.cl.652.SiJWF12ACU.scf	1
SiJWH03BAJ.scf	1
SiJWD02ABG.scf	1
SI.CL.36.cl.3654.Contig1	2
SI.CL.2.cl.228.Contig1	2
SiJWE08BAJ.scf	1
SiJWF08AAL.scf	1
SiJWE06ADY.scf	1
SI.CL.7.cl.706.SiJWA04BAB.scf	1
SiJWF11ADV.scf	1
SI.CL.17.cl.1778.Contig1	2
SiJWB01ADX.scf	1
SiJWB08ACD.scf	1
SI.CL.29.cl.2990.Contig2	2
SiJWE03CAT2.scf	1
SI.CL.36.cl.3689.Contig1	1
SiJWB08BCZ2.scf	1
SI.CL.24.cl.2404.Contig1	1
SiJWG04ABV.scf	1
SiJWB10BCU2.scf	1
SiJWG01CAX.scf	1
SiJWH06BAF.scf	1
SI.CL.10.cl.1041.Contig1	1
SI.CL.38.cl.3821.Contig1	2
SiJWC01BBU.scf	1
SiJWF10BBP.scf	1
SiJWB05BCR.scf	1
SI.CL.25.cl.2544.Contig1	4
SiJWG12BAZ2.scf	1
SiJWE12ACG.scf	1
SI.CL.17.cl.1702.Contig1	2
SiJWE12CAK2.scf	1
SI.CL.14.cl.1402.Contig1	2
SiJWC05AAB.scf	1
SI.CL.26.cl.2656.SiJWE03BAI.scf	1
SiJWE09BAQ.scf	1
SiJWA11CAC2.scf	1
SiJWA11ACT.scf	1
SI.CL.14.cl.1428.Contig1	2
SiJWE07ADQ.scf	1
SiJWE07BDC2.scf	1
SI.CL.19.cl.1978.Contig1	1
SiJWE03BDL2.scf	1
SiJWH02BCY2.scf	1
SI.CL.25.cl.2561.Contig1	1
SiJWC12CAE.scf	1
SI.CL.42.cl.4209.Contig1	3
SiJWG05ABI.scf	1
SI.CL.23.cl.2306.Contig1	2
SI.CL.28.cl.2803.Contig1	3
SiJWC05ABG.scf	1
SI.CL.35.cl.3578.Contig1	1
SiJWE04AAX.scf	1
SI.CL.14.cl.1485.SiJWF02BBR.scf	1
SI.CL.42.cl.4227.SiJWH09BDK2.scf	1
SiJWC05ACT.scf	1
SI.CL.8.cl.853.Contig1	14
SiJWA02ADI.scf	1
SI.CL.5.cl.503.SiJWA03BBC2.scf	1
SiJWE12ADR.scf	1
SiJWE10BBK.scf	1
SI.CL.20.cl.2097.Contig1	2
SiJWH09ACO.scf	1
SiJWH04BBA.scf	1
SiJWA12CAC2.scf	1
SI.CL.42.cl.4226.Contig1	1
SI.CL.2.cl.281.Contig1	3
SI.CL.19.cl.1916.SiJWD09BDW.scf	1
SiJWH11CAJ2.scf	1
SiJWB07CAP.scf	1
SI.CL.4.cl.403.Contig1	2
SI.CL.43.cl.4311.Contig1	2
SiJWA09CAC2.scf	1
SiJWE02BAN.scf	1
SiJWH05BCW2.scf	1
SiJWH09ABM.scf	1
SiJWE06CAT2.scf	1
SI.CL.20.cl.2060.Contig1	2
SI.CL.26.cl.2681.Contig1	3
SI.CL.19.cl.1985.SiJWH05ADJ.scf	1
SI.CL.9.cl.908.Contig1	2
SI.CL.26.cl.2668.Contig1	5
SI.CL.0.cl.076.Contig1	6
SI.CL.22.cl.2248.Contig1	1
SiJWF05BBY.scf	1
SI.CL.16.cl.1605.Contig1	2
SI.CL.43.cl.4314.SiJWG04BCP2.scf	1
SiJWH02ABB.scf	1
SiJWE10AAC2.scf	1
SiJWF02AAU.scf	1
SiJWE11BAH.scf	1
SiJWF10BAR.scf	1
SI.CL.13.cl.1340.Contig2	1
SI.CL.9.cl.945.Contig3	1
SiJWC05BAW2.scf	1
SiJWH09BBI.scf	1
SI.CL.1.cl.142.Contig1	3
SiJWF08BBX.scf	1
SI.CL.8.cl.810.Contig1	2
SiJWG03BAZ2.scf	1
SI.CL.31.cl.3154.Contig1	2
SI.CL.27.cl.2788.Contig1	2
SiJWC08ACD.scf	1
SiJWD02BBK.scf	1
SI.CL.37.cl.3776.Contig1	2
SI.CL.11.cl.1146.Contig1	4
SiJWH02BDE2.scf	1
SiJWC06BDE2.scf	1
SI.CL.4.cl.499.SiJWG11AAM.scf	1
SiJWA04CAF2.scf	1
SiJWB04ADV.scf	1
SI.CL.38.cl.3810.Contig1	1
SI.CL.22.cl.2254.Contig1	3
SiJWA03BBJ2.scf	1
SI.CL.19.cl.1939.Contig1	1
SI.CL.41.cl.4143.SiJWG07CAC2.scf	1
SiJWA07BAF.scf	1
SI.CL.7.cl.726.Contig1	2
SiJWA01CAW.scf	1
SI.CL.24.cl.2401.Contig1	7
SI.CL.8.cl.883.Contig1	6
SI.CL.30.cl.3017.Contig1	2
SI.CL.7.cl.742.Contig1	4
SI.CL.8.cl.838.Contig1	1
SiJWC12BDH.scf	1
SiJWB11AAZ.scf	1
SI.CL.37.cl.3746.Contig1	4
SI.CL.6.cl.680.Contig1	6
SI.CL.29.cl.2982.Contig1	1
SI.CL.14.cl.1455.Contig1	3
SiJWB01CAC2.scf	1
SiJWG07ABH.scf	1
SiJWA06AEA.scf	1
SI.CL.32.cl.3211.Contig1	2
SI.CL.23.cl.2302.Contig1	2
SI.CL.1.cl.162.SiJWG04ADC.scf	1
SI.CL.42.cl.4220.Contig1	2
SiJWE02AAT.scf	1
SI.CL.1.cl.144.Contig1	2
SiJWD12ADA.scf	1
SiJWC05ACL.scf	1
SiJWG05BDH.scf	1
SI.CL.38.cl.3870.Contig1	1
SI.CL.37.cl.3724.Contig1	2
SI.CL.29.cl.2956.Contig1	3
SI.CL.39.cl.3947.Contig1	2
SiJWH04ABS.scf	1
SiJWA01ACL.scf	1
SiJWG06ACK.scf	1
SiJWC10AAJ.scf	1
SiJWH05BAF.scf	1
SiJWB06CAN2.scf	1
SiJWB10ADM.scf	1
SiJWG06AAN.scf	1
SiJWD02AAL.scf	1
SI.CL.26.cl.2602.Contig1	5
SI.CL.32.cl.3294.Contig1	2
SI.CL.10.cl.1021.Contig1	6
SiJWB08ADZ.scf	1
SiJWE02BCW2.scf	1
SiJWA01AEA.scf	1
SiJWA01ACK.scf	1
SiJWC11BAA2.scf	1
SI.CL.6.cl.676.Contig1	4
SiJWG06BCA2.scf	1
SiJWC02ABN.scf	1
SiJWG11BAM.scf	1
SiJWE02ABS.scf	1
SiJWE01ABX.scf	1
SI.CL.0.cl.054.Contig1	3
SI.CL.5.cl.595.SiJWG06BBC2.scf	1
SI.CL.19.cl.1992.SiJWA02AAG.scf	1
SI.CL.17.cl.1792.SiJWD12BAX.scf	1
SiJWB09BDG.scf	1
SiJWG09ACR.scf	1
SiJWA07ABT.scf	1
SiJWF01AEA.scf	1
SI.CL.6.cl.621.Contig1	3
SiJWG07ABO.scf	1
SiJWE02AAU.scf	1
SI.CL.33.cl.3339.Contig1	2
SiJWB04BCC.tag5_B04_04.scf	1
SiJWD12AAM.scf	1
SI.CL.35.cl.3520.Contig1	2
SiJWB03ADP.scf	1
SiJWF06ABN.scf	1
SI.CL.40.cl.4094.Contig1	2
SI.CL.17.cl.1722.Contig1	2
SI.CL.12.cl.1203.Contig1	3
SiJWD05ADJ.scf	1
SiJWF09AAI.scf	1
SI.CL.33.cl.3351.Contig1	2
SI.CL.33.cl.3376.Contig1	2
SiJWB05BBB.scf	1
SiJWH05ABF.scf	1
SiJWC07CAO2.scf	1
SiJWB02ADI.scf	1
SiJWF10ACM.scf	1
SiJWB11ACP.scf	1
SI.CL.5.cl.522.Contig1	2
SiJWD01BAI.scf	1
SI.CL.28.cl.2897.Contig1	2
SI.CL.2.cl.221.Contig1	7
SI.CL.1.cl.157.SiJWB05AAD.scf	1
SI.CL.31.cl.3163.Contig1	2
SI.CL.9.cl.944.Contig1	4
SiJWD11ACN.scf	1
SI.CL.1.cl.184.Contig1	4
SiJWD03ABJ.scf	1
SiJWF11AAB.scf	1
SI.CL.12.cl.1240.Contig1	2
SI.CL.26.cl.2697.Contig1	1
SiJWA08CAO2.scf	1
SI.CL.23.cl.2362.Contig1	2
SI.CL.11.cl.1110.SiJWA01AAI.scf	1
SiJWH12ACM.scf	1
SI.CL.17.cl.1789.SiJWH10BCJ5.scf	1
SI.CL.6.cl.628.Contig1	3
SI.CL.18.cl.1821.Contig1	1
SiJWB07BAR.scf	1
SI.CL.25.cl.2525.Contig1	2
SI.CL.15.cl.1519.SiJWC07BAL.scf	1
SiJWG12AAW.scf	1
SiJWH04ABJ.scf	1
SI.CL.36.cl.3617.Contig1	2
SI.CL.7.cl.784.Contig1	1
SiJWC07ACB.scf	1
SiJWE08BBQ2.scf	1
SI.CL.39.cl.3937.Contig1	2
SiJWD12BAO.scf	1
SiJWA04CAU2.scf	1
SI.CL.7.cl.764.Contig1	1
SI.CL.16.cl.1650.Contig1	2
SiJWA12ABM.scf	1
SiJWA11BBH.scf	1
SiJWC10ACU.scf	1
SiJWA01BAX.scf	1
SiJWG06BDL2.scf	1
SiJWG10ACF.scf	1
SI.CL.5.cl.541.SiJWB11CAP.scf	1
SiJWB06BBZ.scf	1
SI.CL.11.cl.1148.Contig1	2
SiJWH01ADN.scf	1
SiJWG11BCI2.scf	1
SI.CL.34.cl.3485.Contig1	2
SI.CL.1.cl.175.Contig1	4
SI.CL.33.cl.3305.Contig1	1
SI.CL.23.cl.2374.Contig1	2
SiJWF07ACH.scf	1
SiJWH12BBP.scf	1
SiJWF02CAV.scf	1
SiJWB04BBX.scf	1
SiJWE03AAP.scf	1
SI.CL.1.cl.194.Contig5	1
SI.CL.1.cl.163.Contig1	1
SiJWF05BAV.scf	1
SiJWA11CAV.scf	1
SiJWF07ABG.scf	1
SiJWF02ABY.scf	1
SiJWB01ADH.scf	1
SiJWB11BBQ.scf	1
SI.CL.31.cl.3140.Contig1	3
SI.CL.37.cl.3734.SiJWD06BDH.scf	1
SiJWB04BCG2.scf	1
SiJWC10ACY.scf	1
SiJWC07BCG1.scf	1
SiJWH07BBT.scf	1
SI.CL.19.cl.1934.Contig1	2
SiJWG10BBU.scf	1
SI.CL.34.cl.3462.Contig1	2
SI.CL.39.cl.3906.Contig1	2
SiJWH04ACH.scf	1
SiJWD07BAQ.scf	1
SiJWE04CAP.scf	1
SI.CL.4.cl.464.Contig2	41
SiJWG04ACF.scf	1
SiJWF12BEA.scf	1
SiJWB03AAP.scf	1
SI.CL.20.cl.2039.Contig1	9
SiJWA08AAL.scf	1
SI.CL.2.cl.217.Contig1	7
SiJWE07ADL.scf	1
SI.CL.28.cl.2840.Contig1	1
SI.CL.20.cl.2077.Contig1	2
SiJWB04BAX.scf	1
SiJWF05ACJ.scf	1
SiJWF02ACN.scf	1
SI.CL.6.cl.667.Contig1	2
SI.CL.15.cl.1561.Contig1	7
SiJWE12AAN.scf	1
SiJWF03AAN.scf	1
SI.CL.23.cl.2317.Contig1	3
SI.CL.25.cl.2506.Contig1	2
SiJWB08AAP.scf	1
SI.CL.18.cl.1843.Contig1	2
SI.CL.24.cl.2480.Contig1	1
SI.CL.18.cl.1809.Contig1	4
SiJWC11ADH.scf	1
SI.CL.12.cl.1221.Contig1	2
SI.CL.15.cl.1557.Contig1	1
SI.CL.22.cl.2280.SiJWC11ADY.scf	1
SiJWF06ACF.scf	1
SI.CL.3.cl.305.SiJWE06AAB.scf	1
SI.CL.6.cl.671.Contig2	5
SI.CL.29.cl.2977.Contig1	1
SiJWB08ABN.scf	1
SiJWE10ACR.scf	1
SiJWD02BAK.scf	1
SI.CL.15.cl.1537.Contig1	2
SiJWC03BBA.scf	1
SiJWD09BBD2.scf	1
SiJWC12AAB.scf	1
SiJWF12BCK2.scf	1
SI.CL.3.cl.384.Contig1	3
SiJWE04ADR.scf	1
SiJWG08CAC2.scf	1
SI.CL.20.cl.2086.Contig1	3
SI.CL.35.cl.3571.Contig1	3
SI.CL.36.cl.3694.Contig1	2
SiJWH05AAY.scf	1
SI.CL.13.cl.1319.Contig1	7
SiJWH03CAJ2.scf	1
SiJWH09BBW.scf	1
SI.CL.40.cl.4004.Contig1	4
SiJWD02BCW2.scf	1
SI.CL.20.cl.2091.SiJWB05BAJ.scf	1
SiJWE12AAD.scf	1
SiJWA07ADO.scf	1
SiJWG01AAJ.scf	1
SI.CL.35.cl.3547.Contig1	2
SiJWG01AAU.scf	1
SiJWG02BCR.scf	1
SiJWA01BCT3.scf	1
SiJWF09ABY.scf	1
SI.CL.32.cl.3262.SiJWE12CAJ2.scf	1
SiJWE01BAT.scf	1
SiJWF08ABP2.scf	1
SiJWF09ACV.scf	1
SI.CL.17.cl.1746.Contig1	3
SI.CL.15.cl.1570.Contig1	2
SiJWD07BAO.scf	1
SI.CL.11.cl.1124.Contig1	2
SI.CL.14.cl.1456.Contig1	6
SI.CL.42.cl.4295.Contig1	2
SiJWA09CAR2.scf	1
SiJWD01BBY.scf	1
SI.CL.32.cl.3232.Contig2	3
SiJWH11ACR.scf	1
SI.CL.4.cl.463.Contig3	3
SiJWB10BDZ.scf	1
SI.CL.13.cl.1359.Contig1	4
SiJWA11ADB.scf	1
SiJWG09CAV.scf	1
SI.CL.17.cl.1715.Contig1	2
SI.CL.25.cl.2577.Contig1	4
SiJWF03CAD.scf	1
SI.CL.5.cl.547.Contig1	2
SiJWD11BBG.scf	1
SiJWG10BDZ.scf	1
SiJWG09AAX.scf	1
SiJWF04ACO.scf	1
SI.CL.3.cl.366.Contig1	2
SI.CL.17.cl.1700.SiJWA01BCF2.scf	1
SiJWD01BAN.scf	1
SiJWC12ADG.scf	1
SI.CL.24.cl.2432.Contig1	2
SI.CL.40.cl.4058.Contig1	2
SiJWG06ABG.scf	1
SI.CL.17.cl.1727.Contig1	2
SiJWA09ABH.scf	1
SiJWC05ADA.scf	1
SiJWG07ABL.scf	1
SI.CL.29.cl.2952.Contig1	2
SI.CL.31.cl.3189.SiJWB08BAY2.scf	1
SiJWA06ADC.scf	1
SiJWB03ADU.scf	1
SiJWH04ACJ.scf	1
SiJWA11AAN.scf	1
SiJWB03ABF.scf	1
SI.CL.36.cl.3663.Contig1	2
SiJWD09BBL.scf	1
SI.CL.16.cl.1610.Contig1	6
SiJWE01BBZ.scf	1
SI.CL.25.cl.2521.SiJWF06BAD.scf	1
SI.CL.0.cl.077.Contig1	3
SI.CL.23.cl.2373.Contig1	4
SiJWF05BBP.scf	1
SI.CL.6.cl.611.SiJWF07AAP.scf	1
SI.CL.0.cl.039.Contig2	3
SI.CL.16.cl.1685.Contig1	4
SI.CL.23.cl.2389.Contig1	3
SiJWA07ACF.scf	1
SiJWH06BDD2.scf	1
SI.CL.7.cl.730.Contig1	2
SI.CL.2.cl.296.SiJWF06AAF2.scf	1
SI.CL.22.cl.2259.Contig1	3
SI.CL.0.cl.011.Contig1	10
SiJWB02ABS.scf	1
SiJWD03BCH2.scf	1
SI.CL.25.cl.2557.Contig1	2
SiJWF04BBU.scf	1
SI.CL.2.cl.275.Contig1	1
SiJWH02ADU.scf	1
SiJWH03ABD.scf	1
SiJWF08BDE2.scf	1
SiJWE04ABC.scf	1
SiJWH10BAF.scf	1
SI.CL.22.cl.2233.Contig1	1
SiJWG01ABP2.scf	1
SiJWB01BDM2.scf	1
SiJWF05AAL.scf	1
SI.CL.5.cl.597.Contig1	11
SI.CL.31.cl.3164.SiJWA11BBA.scf	1
SiJWA06BDG.scf	1
SiJWH05CAM2.scf	1
SiJWC08ACM.scf	1
SiJWE03BDV2.scf	1
SiJWD01BBV2.scf	1
SiJWB05AEA.scf	1
SiJWA05BDA2.scf	1
SiJWF12ADN.scf	1
SI.CL.10.cl.1001.Contig1	3
SI.CL.33.cl.3322.Contig1	3
SI.CL.21.cl.2149.Contig1	8
SI.CL.20.cl.2037.Contig1	2
SI.CL.23.cl.2334.Contig1	3
SiJWG12BEA.scf	1
SI.CL.4.cl.463.SiJWA07BDR2.scf	1
SI.CL.3.cl.378.Contig1	4
SI.CL.3.cl.378.SiJWC02BAL.scf	1
SI.CL.7.cl.786.Contig1	2
SiJWG05AAG.scf	1
SiJWA02ABP2.scf	1
SI.CL.13.cl.1314.Contig1	2
SiJWF02ADT.scf	1
SiJWB04AAZ.scf	1
SI.CL.17.cl.1731.Contig1	2
SI.CL.6.cl.671.SiJWH12ACN.scf	1
SiJWF06AAC2.scf	1
SiJWH02ACB.scf	1
SI.CL.8.cl.845.Contig1	2
SI.CL.0.cl.079.SiJWG08BDV2.scf	1
SI.CL.4.cl.412.SiJWF06ADC.scf	1
SiJWD08ADB.scf	1
SI.CL.23.cl.2313.SiJWF04BBY.scf	1
SiJWG12BAO.scf	1
SiJWH12CAO2.scf	1
SI.CL.36.cl.3667.Contig1	2
SiJWC09BAB.scf	1
SI.CL.20.cl.2035.SiJWH03ACH.scf	1
SiJWD01BAL.scf	1
SiJWF06BAT.scf	1
SI.CL.39.cl.3954.Contig1	1
SI.CL.2.cl.272.Contig1	8
SiJWH05BBL.scf	1
SiJWB11BCW2.scf	1
SI.CL.1.cl.157.Contig1	7
SiJWH06BCU2.scf	1
SiJWC07BAN.scf	1
SiJWC10CAV.scf	1
SI.CL.10.cl.1021.SiJWB03BDF.scf	1
SI.CL.29.cl.2964.Contig1	2
SI.CL.11.cl.1113.Contig1	2
SI.CL.14.cl.1452.Contig1	4
SI.CL.33.cl.3315.Contig1	2
SiJWD09BBT.scf	1
SI.CL.13.cl.1312.Contig1	2
SI.CL.3.cl.332.Contig1	3
SI.CL.15.cl.1598.Contig1	2
SiJWF04CAW.scf	1
SiJWH08ADZ.scf	1
SI.CL.10.cl.1062.Contig1	2
SI.CL.15.cl.1537.SiJWC04BCJ4.scf	1
SiJWB03ACU.scf	1
SI.CL.12.cl.1294.SiJWG01ABY.scf	1
SiJWA07ACD.scf	1
SI.CL.37.cl.3762.Contig1	2
SiJWD05BCD2.scf	1
SI.CL.6.cl.650.Contig1	8
SI.CL.7.cl.731.Contig1	4
SI.CL.2.cl.274.Contig1	5
SiJWG01BDU2.scf	1
SI.CL.27.cl.2729.Contig1	2
SiJWG10BAW2.scf	1
SiJWF09ACQ.scf	1
SI.CL.25.cl.2563.Contig1	2
SiJWF06CAV.scf	1
SI.CL.15.cl.1572.Contig1	2
SI.CL.40.cl.4001.SiJWC01BDOC.scf	1
SiJWE06ABY.scf	1
SI.CL.33.cl.3338.Contig1	4
SiJWE10CAD.scf	1
SI.CL.1.cl.164.Contig1	2
SiJWG03ACZ.scf	1
SiJWD07ADT.scf	1
SiJWB04BAW2.scf	1
SiJWF04AAD.scf	1
SI.CL.40.cl.4081.Contig1	2
SI.CL.15.cl.1509.Contig1	2
SiJWC03ADE.scf	1
SiJWG09ACZ.scf	1
SI.CL.33.cl.3396.Contig1	3
SI.CL.13.cl.1349.Contig1	2
SI.CL.7.cl.737.Contig2	6
SI.CL.8.cl.822.Contig1	2
SiJWG07BCE2.scf	1
SiJWF04ACM.scf	1
SiJWD07ABA.scf	1
SiJWA11BEA.scf	1
SiJWD03AEA.scf	1
SI.CL.28.cl.2810.SiJWE01CAA.scf	1
SiJWE03ABV.scf	1
SiJWB03BEA.scf	1
SiJWH10BCE.scf	1
SiJWA12AAM.scf	1
SI.CL.0.cl.027.Contig1	4
SI.CL.33.cl.3363.Contig1	2
SI.CL.2.cl.233.Contig5	1
SiJWH02ACM.scf	1
SiJWA09ACR.scf	1
SiJWH05BAD.scf	1
SiJWF02BAB.scf	1
SiJWB11ACQ.scf	1
SI.CL.29.cl.2965.Contig1	2
SiJWH04BBD2.scf	1
SiJWD10CAR2.scf	1
SiJWG12AAK.scf	1
SI.CL.39.cl.3971.Contig1	2
SI.CL.27.cl.2702.Contig1	2
SiJWB06ADJ.scf	1
SI.CL.5.cl.546.Contig1	2
SI.CL.8.cl.805.SiJWC01BAQ.scf	1
SiJWA02AAO.scf	1
SiJWF09CAP.scf	1
SiJWB02ABL.scf	1
SI.CL.39.cl.3972.Contig1	2
SI.CL.27.cl.2704.Contig1	7
SI.CL.4.cl.499.Contig2	1
SI.CL.6.cl.645.Contig1	3
SI.CL.40.cl.4085.Contig1	1
SiJWA06AAE.tag5_A06_02.scf	1
SI.CL.17.cl.1745.SiJWA08ADN.scf	1
SiJWE12AAX.scf	1
SiJWA05BDV2.scf	1
SiJWE04ACL.scf	1
SiJWG10AAD.scf	1
SiJWB10ADG.scf	1
SiJWF01BBN2.scf	1
SiJWE06BCU2.scf	1
SiJWE04CAU2.scf	1
SiJWH12ABA.scf	1
SiJWG12BAQ.scf	1
SiJWF07BAU.scf	1
SI.CL.3.cl.371.Contig3	2
SI.CL.27.cl.2799.SiJWF04BAQ.scf	1
SI.CL.13.cl.1384.Contig1	3
SI.CL.30.cl.3072.Contig1	2
SiJWC06BAL.scf	1
SiJWE10CAK2.scf	1
SiJWE11ABE.tag5_E11_09.scf	1
SI.CL.37.cl.3707.Contig1	2
SiJWE12CAE.scf	1
SI.CL.42.cl.4288.Contig1	4
SiJWG05BAS.scf	1
SI.CL.18.cl.1899.Contig1	2
SI.CL.36.cl.3644.Contig1	4
SI.CL.13.cl.1358.SiJWB08BAO.scf	1
SiJWE12BAH.scf	1
SI.CL.7.cl.701.Contig1	2
SiJWG10AAJ.scf	1
SI.CL.27.cl.2770.Contig1	2
SI.CL.8.cl.812.SiJWC01ACN.scf	1
SI.CL.16.cl.1688.Contig1	3
SI.CL.33.cl.3392.Contig1	2
SiJWB01BBG.scf	1
SiJWD07BDH.scf	1
SiJWH05BBP.scf	1
SI.CL.10.cl.1091.Contig1	2
SI.CL.1.cl.173.SiJWG11AAN.scf	1
SiJWG01ACM.scf	1
SI.CL.17.cl.1700.Contig1	2
SiJWA04CAC2.scf	1
SiJWC06BBS.scf	1
SiJWA06ADH.scf	1
SI.CL.15.cl.1510.Contig1	5
SiJWG06ABB.scf	1
SI.CL.3.cl.305.Contig1	2
SiJWA06ABH.scf	1
SI.CL.21.cl.2193.Contig1	6
SI.CL.7.cl.709.SiJWH01CAD.scf	1
SI.CL.17.cl.1728.Contig1	3
SI.CL.6.cl.632.Contig1	2
SiJWC10BAL.scf	1
SI.CL.3.cl.383.SiJWC12ACB.scf	1
SiJWE03BAF.scf	1
SiJWA06BAA2.scf	1
SiJWE07BDG.scf	1
SiJWH12ACG.scf	1
SiJWF10BAB.scf	1
SiJWD02ADZ.scf	1
SiJWH03BCH2.scf	1
SiJWB12AAJ.scf	1
SI.CL.12.cl.1271.Contig1	2
SiJWB02BCC.tag5_B02_04.scf	1
SI.CL.25.cl.2513.Contig1	3
SI.CL.11.cl.1166.Contig2	3
SiJWE11BBU.scf	1
SI.CL.5.cl.515.Contig1	2
SiJWH11BAZ2.scf	1
SI.CL.23.cl.2325.Contig1	2
SiJWF05ABM.scf	1
SI.CL.3.cl.329.Contig1	3
SiJWG08CAK2.scf	1
SiJWC07ADQ.scf	1
SI.CL.7.cl.723.Contig1	2
SiJWB08AAL.scf	1
SiJWD05ADY.scf	1
SI.CL.24.cl.2469.Contig1	3
SI.CL.7.cl.743.Contig1	2
SI.CL.7.cl.706.Contig1	3
SiJWF06AAW.scf	1
SiJWE01ABB.scf	1
SiJWE01ACB.scf	1
SI.CL.1.cl.143.SiJWG03AAZ.scf	1
SI.CL.27.cl.2790.Contig1	1
SiJWF02ABR.scf	1
SiJWF06AAI.scf	1
SI.CL.12.cl.1266.Contig1	7
SiJWC10AAZ.scf	1
SI.CL.10.cl.1072.Contig1	2
SiJWA11BBR.scf	1
SI.CL.3.cl.310.SiJWE07CAJ2.scf	1
SI.CL.38.cl.3880.SiJWH03BDD2.scf	1
SI.CL.0.cl.012.Contig1	6
SI.CL.16.cl.1674.SiJWE12AAY.scf	1
SI.CL.13.cl.1337.Contig1	2
SI.CL.30.cl.3075.Contig1	2
SI.CL.25.cl.2558.Contig1	1
SiJWE09ACH.scf	1
SI.CL.23.cl.2337.Contig1	1
SI.CL.13.cl.1316.Contig1	10
SiJWC08BDPR5E05.scf	1
SiJWE07AAZ.scf	1
SI.CL.0.cl.053.SiJWC06BAV.scf	1
SI.CL.37.cl.3725.Contig1	2
SI.CL.26.cl.2693.Contig1	3
SI.CL.33.cl.3331.Contig1	2
SiJWG01BBN2.scf	1
SI.CL.29.cl.2917.Contig1	3
SI.CL.34.cl.3440.Contig1	2
SI.CL.6.cl.668.Contig1	3
SI.CL.22.cl.2227.Contig1	2
SiJWD12BDW.scf	1
SiJWC05ADL.scf	1
SI.CL.35.cl.3523.Contig1	2
SiJWH09CAJ2.scf	1
SI.CL.0.cl.029.SiJWF01ABB.scf	1
SI.CL.29.cl.2976.Contig1	3
SiJWH04CAB.scf	1
SI.CL.22.cl.2263.SiJWH10BCA2.scf	1
SI.CL.21.cl.2175.SiJWE04ADH.scf	1
SiJWD06BCL2.scf	1
SI.CL.16.cl.1630.SiJWC03ABZII.scf	1
SI.CL.12.cl.1210.Contig1	2
SI.CL.17.cl.1714.Contig1	5
SI.CL.11.cl.1132.Contig1	2
SI.CL.10.cl.1019.Contig2	2
SI.CL.27.cl.2725.SiJWH05BAT.scf	1
SiJWF09CAK2.scf	1
SiJWA04AAD.scf	1
SiJWC06CAJ2.scf	1
SiJWF10BDV2.scf	1
SiJWC10BDB2.scf	1
SiJWF01ABI.scf	1
SiJWF06ADJ.scf	1
SI.CL.33.cl.3318.Contig1	2
SiJWD12ABH.scf	1
SiJWF06AAS.scf	1
SI.CL.19.cl.1915.Contig1	2
SI.CL.17.cl.1742.Contig1	2
SI.CL.22.cl.2268.Contig1	3
SI.CL.21.cl.2106.Contig1	2
SI.CL.23.cl.2338.Contig1	3
SiJWB06BAX.scf	1
SI.CL.16.cl.1685.SiJWH05BBR.scf	1
SiJWC03ABG.scf	1
SiJWE01ABL.scf	1
SI.CL.32.cl.3260.Contig1	2
SI.CL.11.cl.1168.Contig1	7
SiJWA04ACB.scf	1
SI.CL.29.cl.2906.Contig1	2
SI.CL.3.cl.356.Contig2	4
SiJWE07CAK2.scf	1
SI.CL.10.cl.1007.Contig1	3
SiJWH01AAZ.scf	1
SiJWH02ABR.scf	1
SI.CL.35.cl.3552.Contig1	2
SiJWD11ADC.scf	1
SiJWG04ADD.scf	1
SI.CL.3.cl.378.SiJWB06ADA.scf	1
SiJWC05BBY.scf	1
SI.CL.36.cl.3605.Contig1	2
SI.CL.3.cl.362.Contig1	2
SI.CL.9.cl.956.Contig1	5
SiJWE07CAD.scf	1
SiJWB05ADG.scf	1
SI.CL.25.cl.2569.Contig1	3
[truncated: 8,124 more rows]
