# Supplementary material for: An annotated cDNA library and microarray for large-scale gene-expression studies in the ant Solenopsis invicta
Source: Genome Biol. 2007 Jan 15;8(1):R9. doi: 10.1186/gb-2007-8-1-r9 (PMC1839134; doi:10.1186/gb-2007-8-1-r9)
Supplement: Additional data file 11 — Fire ant clones that are differentially expressed between adults and brood based on a 4-fold cutoff [file gb-2007-8-1-r9-S11.xls]

## Sheet: Sheet1
Additional data file 11: Adult- and brood-enriched genes using 4-fold cutoff
Please note that this is from one biological replicate.
The 4-fold cutoff is based on four technical replicates.
Adult Enriched genes (1165 total)											Brood Enriched genes (1401 total)
ID	B109	neg B110	C021	neg C022	Average	SD	N	t-value	p-value		ID	B109	neg B110	C021	neg C022	Average	SD	N	t-value	p-value
SiJWD04ACT_pcr_2	-6.02592	-6.27095	-8.88678	-7.82569	-7.25234	1.34998	4	10.7443	0.00172406		SiJWF09BAF_pcr_1	0.737159	1.26563	2.86113	3.13651	2.00011	1.1786	4	3.39405	0.0426475
SiJWA01CAK_pcr_1	-7.267	-6.31482	-7.37477	-7.4655	-7.10552	0.533343	4	26.6452	0.000115989		SiJWA06BAX_pcr_1	1.09349	1.3597	2.82892	2.7232	2.00133	0.902195	4	4.43657	0.0212862
SiJWE10CAO_pcr_1	-8.36565	-5.1809	-8.13977	-6.65422	-7.08514	1.47916	4	9.57994	0.00241326		SiJWD08ADM_pcr_1	1.72306	2.15086	2.02851	2.11857	2.00525	0.195118	4	20.5543	0.000251811
SiJWH12ADP_pcr_1	-6.16447	-6.18268	-7.55469	-7.75431	-6.91404	0.85892	4	16.0994	0.000521248		SiJWC06BCE_pcr_1	0.912509	0.576954	3.08684	3.44572	2.0055	1.46957	4	2.72938	0.0719784
SiJWH09BCV_pcr_1	-5.91067	-5.41859	-8.0891	-8.13989	-6.88956	1.42878	4	9.644	0.00236668		SiJWG09AAR_pcr_2	2.35697	1.89097	2.06624	1.72562	2.00995	0.269934	4	14.8922	0.000657041
SiJWB04AAD_pcr_2	-6.03887	-6.39179	-7.42002	-7.44041	-6.82277	0.716108	4	19.0551	0.000315606		SiJWG04ACJ_pcr_2	1.35393	1.3144	2.6636	2.71203	2.01099	0.78195	4	5.14353	0.0142408
SiJWH01ACR_pcr_2	-5.77281	-6.18868	-7.53705	-7.77098	-6.81738	0.985507	4	13.8353	0.000817333		SiJWG11CAV_pcr_1	1.23885	0.956947	3.08048	2.78326	2.01488	1.07197	4	3.75921	0.0329078
SiJWG04CAK_pcr_1	-5.8186	-5.78561	-7.93362	-7.34601	-6.72096	1.08787	4	12.3562	0.001142		SiJWC01ABW_pcr_2	2.13983	2.03175	1.99615	1.89261	2.01508	0.101977	4	39.5203	3.56458e-05
SiJWG11ABG_pcr_2	-5.53928	-5.43002	-8.02474	-7.61885	-6.65322	1.36022	4	9.78256	0.00226993		SiJWB02BDI_pcr_1	1.86955	2.15738	1.9705	2.0801	2.01938	0.125923	4	32.0732	6.6608e-05
SiJWE02BDQ_pcr_1	-5.8094	-6.42293	-6.79182	-7.38655	-6.60267	0.66127	4	19.9697	0.000274442		SiJWA06BAW_pcr_1	1.11525	0.978768	3.06589	2.9177	2.0194	1.12583	4	3.5874	0.0370913
SiJWG08BDC_pcr_1	-5.30646	-5.15472	-8.10469	-7.71571	-6.5704	1.55643	4	8.44288	0.0034873		SiJWE12ADB_pcr_1	1.86688	2.19049	1.88638	2.13567	2.01985	0.167079	4	24.1784	0.000155067
SiJWE10ACQ_pcr_2	-5.51768	-5.80095	-7.80182	-6.88401	-6.50111	1.04814	4	12.405	0.00112878		SiJWH12BCC_pcr_1	1.9202	2.00667	2.10492	2.0548	2.02165	0.0786333	4	51.4196	1.61992e-05
SiJWF01ACW_pcr_2	-5.32208	-5.45933	-7.8685	-7.24484	-6.47369	1.27741	4	10.1357	0.00204597		SiJWA08BAL_pcr_1	1.13905	0.519411	3.44987	2.97873	2.02177	1.41322	4	2.86123	0.0645121
SiJWG05ACR_pcr_2	-5.0824	-5.90703	-7.35528	-7.40608	-6.4377	1.13991	4	11.2951	0.00148825		SiJWF12ACO_pcr_2	2.13367	2.15968	1.88259	1.91792	2.02346	0.143393	4	28.2226	9.7661e-05
SiJWE05BCA_pcr_1	-5.27705	-4.92457	-7.92934	-7.43641	-6.39184	1.51114	4	8.45961	0.00346732		SiJWA12AAB_pcr_2	1.62888	1.75632	2.46101	2.25381	2.025	0.396467	4	10.2152	0.00199959
SiJWH02BAR_pcr_1	-5.81445	-5.57155	-6.88115	-7.18385	-6.36275	0.789426	4	16.1199	0.000519275		SiJWG08CAC_pcr_1	2.04115	1.94551	2.15988	1.96262	2.02729	0.0977113	4	41.4955	3.08007e-05
SiJWF06AAN_pcr_2	-5.86591	-5.80894	-6.88107	-6.87503	-6.35774	0.601259	4	21.1481	0.000231298		SiJWA01BCY_pcr_1	1.7337	1.87304	2.23842	2.27381	2.02974	0.267904	4	15.1528	0.000624057
SiJWG01ABF_pcr_2	-5.80574	-5.91536	-6.96055	-6.72727	-6.35223	0.577412	4	22.0024	0.000205513		SiJWH06AEA_pcr_1	1.43618	1.43774	2.49244	2.75965	2.0315	0.695133	4	5.84493	0.00998071
SiJWD03BCJ_pcr_1	-6.23149	-6.80073	-6.52444	-5.85187	-6.35213	0.406509	4	31.2521	7.19837e-05		SiJWD12BDF_pcr_1	1.87458	1.64221	2.32519	2.30902	2.03775	0.336298	4	12.1187	0.00120936
SiJWF09ADL_pcr_1	-5.38083	-5.3726	-7.20373	-7.44774	-6.35122	1.12967	4	11.2444	0.00150812		SiJWG06CAP_pcr_1	2.29038	1.91108	2.04169	1.91455	2.03943	0.178	4	22.9148	0.000182033
SiJWH08BAA_pcr_2	-4.9116	-5.20214	-7.42231	-7.61838	-6.28861	1.42947	4	8.79854	0.00309317		SiJWG04BDJ_pcr_1	2.01909	1.69792	2.15087	2.29155	2.03986	0.253657	4	16.0836	0.000522769
SiJWB01BDN_pcr_1	-5.08659	-4.74107	-7.52447	-7.77936	-6.28287	1.59052	4	7.90039	0.00422695		SiJWE02BCV_pcr_1	1.41279	1.80452	2.34548	2.62	2.0457	0.541119	4	7.56099	0.00479778
SiJWH02ADV_pcr_1	-4.70692	-4.88011	-7.74984	-7.67066	-6.25188	1.68577	4	7.41725	0.00507026		SiJWH12BAG_pcr_2	1.94189	1.44213	2.0011	2.79775	2.04572	0.560547	4	7.29902	0.00530986
SiJWH02AAW_pcr_2	-5.44404	-4.95524	-7.34513	-7.15281	-6.2243	1.20246	4	10.3526	0.00192274		SiJWG03CAF_pcr_1	2.07378	2.35811	1.88703	1.86536	2.04607	0.2281	4	17.9401	0.000377709
SiJWB11AAW_pcr_2	-5.60959	-5.73172	-6.95271	-6.55596	-6.2125	0.648208	4	19.1682	0.000310088		SiJWE01BDU_pcr_1	0.926868	1.5084	2.85819	2.89494	2.0471	0.986884	4	4.14862	0.025447
SiJWD01BAQ_pcr_1	-5.06813	-4.90733	-7.26434	-7.59763	-6.20936	1.41868	4	8.75371	0.00313949		SiJWF01BDK_pcr_1	1.32998	1.65902	2.58775	2.61181	2.04714	0.652193	4	6.27772	0.00816113
SiJWH10BBO_pcr_1	-5.51199	-5.33343	-6.79274	-7.17805	-6.20405	0.918723	4	13.5058	0.000877815		SiJWG01BAO_pcr_1	1.46503	1.59192	2.54058	2.59698	2.04863	0.603288	4	6.79154	0.0065263
SiJWF04BCF_pcr_1	-5.38307	-5.24259	-7.04099	-7.01644	-6.17077	0.992374	4	12.4364	0.00112039		SiJWE03ABT_pcr_2	1.75878	2.01325	2.16488	2.26249	2.04985	0.219472	4	18.6798	0.000334881
SiJWF02BAC_pcr_1	-4.93645	-5.1931	-7.72887	-6.79764	-6.16401	1.32914	4	9.2752	0.00265228		SiJWG11CAR_pcr_1	0.780072	0.834909	3.50832	3.08106	2.05109	1.44671	4	2.83552	0.0658894
SiJWC09BBJ_pcr_1	-5.11842	-5.58207	-7.35498	-6.45435	-6.12745	0.988143	4	12.402	0.00112961		SiJWH03AAC_pcr_2	0.835036	0.796662	2.88371	3.69127	2.05167	1.46468	4	2.80153	0.0677667
SiJWH11CAM_pcr_1	-4.78203	-4.67229	-7.57319	-7.27069	-6.07455	1.56137	4	7.78107	0.00441687		SiJWG11BCS_pcr_1	1.20055	1.42811	2.76961	2.81094	2.0523	0.857351	4	4.78754	0.0173302
SiJWA05BBH_pcr_1	-4.79744	-5.06334	-7.48548	-6.91464	-6.06523	1.33538	4	9.08392	0.00281852		SiJWB02AAE_pcr_2	2.00216	2.01061	2.08467	2.12303	2.05512	0.0585116	4	70.2465	6.35741e-06
SiJWC07BDB_pcr_1	-5.4626	-5.67598	-6.37947	-6.66588	-6.04598	0.56942	4	21.2356	0.000228467		SiJWG11AAP_pcr_2	2.51605	2.7177	1.42466	1.56871	2.05678	0.654606	4	6.28402	0.008138
SiJWB09BDS_pcr_1	-4.95328	-4.98949	-7.20118	-6.94646	-6.0226	1.21838	4	9.88627	0.00220092		SiJWH08ACR_pcr_2	1.64444	1.6586	2.60046	2.32773	2.05781	0.482206	4	8.53497	0.00337915
SiJWC11ADI_pcr_1	-5.26769	-5.23152	-7.04089	-6.48747	-6.00689	0.903279	4	13.3002	0.000918603		SiJWF08BCK_pcr_1	1.10832	1.08879	2.80874	3.22677	2.05815	1.12114	4	3.67153	0.0349628
SiJWB10ADC_pcr_1	-5.02608	-4.76115	-7.52325	-6.68698	-5.99937	1.32609	4	9.04823	0.00285105		SiJWA03ADA_pcr_1	2.01669	2.34695	1.97175	1.90245	2.05946	0.197335	4	20.8728	0.000240521
SiJWF12ADP_pcr_1	-4.73262	-5.37114	-6.61558	-7.2763	-5.99891	1.15608	4	10.378	0.00190898		SiJWE04BAH_pcr_2	1.82262	2.19297	1.89317	2.32927	2.05951	0.241086	4	17.0852	0.000436794
SiJWB01AAE_pcr_2	-5.29716	-5.1996	-6.67092	-6.80617	-5.99346	0.863035	4	13.8893	0.000807954		SiJWH10BBK_pcr_1	1.42147	1.80765	2.24433	2.77045	2.06097	0.580261	4	7.10361	0.00573966
SiJWA11CAK_pcr_1	-4.56512	-5.15717	-7.23844	-6.88441	-5.96128	1.30117	4	9.16295	0.00274821		SiJWG10ADE_pcr_1	1.51566	1.49125	2.57504	2.66542	2.06184	0.645903	4	6.38437	0.00778091
SiJWF05ADT_pcr_1	-6.12579	-5.17673	-6.51119	-6.00888	-5.95564	0.56188	4	21.199	0.000229645		SiJWB12ADC_pcr_1	1.59628	1.79192	2.37788	2.48692	2.06325	0.435956	4	9.46541	0.0024996
SiJWH03ADN_pcr_1	-5.07413	-5.01755	-6.81897	-6.84046	-5.93778	1.03022	4	11.5272	0.00140169		SiJWA01CAU_pcr_1	NA	1.09223	2.84883	2.24978	2.06361	0.892975	3	4.00267	0.0571211
SiJWB03ACA_pcr_2	-4.78622	-4.83532	-7.26428	-6.76927	-5.91377	1.28972	4	9.1706	0.00274153		SiJWB12CAT_pcr_1	0.955687	1.08397	3.12593	3.08989	2.06387	1.20678	4	3.42045	0.0418292
SiJWA03ADT_pcr_1	-5.46277	-5.00698	-7.06477	-6.11094	-5.91137	0.892435	4	13.2477	0.000929415		SiJWC03ACC_pcr_2	1.28542	1.13011	2.89372	2.95611	2.06634	0.993748	4	4.15868	0.0252847
SiJWH01ACJ_pcr_2	-4.9781	-4.76628	-7.31561	-6.54773	-5.90193	1.23271	4	9.57555	0.0024165		SiJWG04BBK_pcr_1	0.923529	1.40778	2.92029	3.01462	2.06656	1.05959	4	3.90067	0.0299076
SiJWE10BAC_pcr_1	-5.71111	-5.54735	-6.99911	-5.33589	-5.89836	0.749732	4	15.7346	0.000557989		SiJWB09BAD_pcr_1	1.35426	1.41654	2.20802	3.30377	2.07064	0.909308	4	4.55433	0.0198392
SiJWC10ACA_pcr_2	-4.97538	-5.08855	-6.8353	-6.64337	-5.88565	0.989938	4	11.891	0.001279		SiJWB12AAH_pcr_2	1.60434	1.96646	2.58748	2.12748	2.07144	0.407694	4	10.1617	0.00203062
SiJWA12BAM_pcr_1	-4.8414	-5.40498	-7.132	-6.15342	-5.88295	0.991054	4	11.8721	0.001285		SiJWB06CAD_pcr_1	0.80201	0.882809	2.98009	3.64305	2.07699	1.45141	4	2.86203	0.0644697
SiJWG08ACH_pcr_2	-4.61563	-4.48181	-7.45124	-6.9468	-5.87387	1.54491	4	7.60414	0.00471978		SiJWA02BDF_pcr_1	2.25223	2.30284	2.06375	1.71211	2.08273	0.267643	4	15.5635	0.000576413
SiJWG12BDA_pcr_1	-5.28433	-5.33641	-6.90965	-5.87569	-5.85152	0.754379	4	15.5135	0.000581949		SiJWD01CAB_pcr_1	4.37873	2.68429	0.708629	0.564513	2.08404	1.80984	4	2.303	0.1047
SiJWA07BBH_pcr_1	-4.8138	-4.75841	-7.51308	-6.29186	-5.84429	1.31988	4	8.85578	0.00303533		SiJWF06CAF_pcr_1	0.571109	0.650142	3.14368	3.97547	2.0851	1.73641	4	2.40162	0.0957348
SiJWA10BCY_pcr_1	-4.6061	-4.65968	-7.29483	-6.79755	-5.83954	1.4082	4	8.29362	0.00367251		SiJWH10AAJ_pcr_2	2.14037	1.89143	2.03122	2.27869	2.08543	0.164258	4	25.3921	0.000133954
SiJWH06CAH_pcr_1	-4.73548	-4.90214	-6.97077	-6.70823	-5.82916	1.17353	4	9.93437	0.00216985		SiJWH03BAA_pcr_2	1.03176	0.90884	3.04213	3.35919	2.08548	1.29516	4	3.22042	0.0485688
SiJWB03CAB_pcr_1	-4.60546	-4.3367	-7.13681	-7.16035	-5.80983	1.54977	4	7.49766	0.00491539		SiJWE05BAE_pcr_1	2.02262	1.59228	2.26506	2.47425	2.08855	0.378835	4	11.0262	0.00159765
SiJWH06ACP_pcr_2	-4.62588	-4.93575	-6.40438	-7.24685	-5.80321	1.23614	4	9.38927	0.00255929		SiJWE11ABK_pcr_2	1.02374	0.849554	3.12429	3.35697	2.08864	1.33549	4	3.1279	0.0521504
SiJWH01BDJ_pcr_1	-4.6602	-4.52776	-6.83132	-7.17771	-5.79925	1.39993	4	8.28502	0.00368357		SiJWF02BAB_pcr_1	2.29346	2.08214	2.02319	1.95784	2.08916	0.145356	4	28.7453	9.24444e-05
SiJWH09BCF_pcr_1	-5.26952	-5.26721	-6.58592	-6.04583	-5.79212	0.643722	4	17.9957	0.000374246		SiJWC05BAK_pcr_2	1.41811	1.29099	2.6829	2.96797	2.08999	0.858722	4	4.86767	0.016564
SiJWH05AAN_pcr_2	-5.051	-5.40549	-6.34609	-6.32169	-5.78107	0.654618	4	17.6624	0.000395668		SiJWE09ACL_pcr_2	3.19374	3.33066	0.707594	1.1301	2.09052	1.36503	4	3.06297	0.0548648
SiJWE03BDJ_pcr_1	-5.17872	-5.23568	-6.77492	-5.92646	-5.77894	0.745911	4	15.495	0.000584012		SiJWB11AAZ_pcr_2	1.78657	1.71985	2.35605	2.52794	2.0976	0.404734	4	10.3653	0.00191583
SiJWA11BDV_pcr_1	-4.55076	-4.55929	-7.14438	-6.79462	-5.76226	1.4013	4	8.22417	0.00376313		SiJWG02AAN_pcr_2	2.28121	2.37159	1.93163	1.80901	2.09836	0.270563	4	15.5111	0.000582219
SiJWE11ADA_pcr_1	-4.7055	-4.76321	-6.97222	-6.58723	-5.75704	1.19154	4	9.66318	0.00235296		SiJWB11BDW_pcr_2	1.24844	1.26895	2.92687	2.9494	2.09841	0.969704	4	4.32795	0.0227443
SiJWE03BCL_pcr_1	-5.17351	-5.12483	-7.41751	-5.29626	-5.75303	1.112	4	10.3472	0.00192571		SiJWC09ADF_pcr_1	2.17683	2.16192	2.04167	2.02689	2.10183	0.0784651	4	53.5735	1.43244e-05
SiJWF04BAR_pcr_1	-4.56403	-4.43951	-7.1459	-6.83729	-5.74668	1.4439	4	7.95993	0.00413621		SiJWA11BCH_pcr_1	1.86407	2.3544	2.30326	1.88856	2.10257	0.262283	4	16.0329	0.0005277
SiJWH12BCV_pcr_1	-4.87837	-4.30578	-6.86047	-6.93028	-5.74372	1.3505	4	8.50607	0.00341261		SiJWB11AAZ_pcr_1	1.92709	1.92771	2.33451	2.22272	2.10301	0.207843	4	20.2364	0.000263793
SiJWC08BDR_pcr_1	-4.70915	-4.90753	-6.9979	-6.15786	-5.69311	1.0807	4	10.5359	0.00182618		SiJWA10BBA_pcr_1	2.5251	2.78418	1.59753	1.50794	2.10369	0.645953	4	6.51344	0.00735128
SiJWB05ABJ_pcr_2	-4.28312	-4.6104	-6.9093	-6.88995	-5.67319	1.42247	4	7.97653	0.00411137		SiJWA05ADI_pcr_1	1.73322	1.43735	2.56842	2.67595	2.10374	0.612294	4	6.87165	0.00631146
SiJWG02BBO_pcr_1	-4.42131	-4.5567	-7.4414	-6.23484	-5.66356	1.444	4	7.84428	0.00431489		SiJWA09ACM_pcr_2	0.929422	2.02067	2.5069	2.96146	2.10462	0.872573	4	4.82393	0.0169767
SiJWG11BAK_pcr_2	-4.7114	-5.01672	-6.49564	-6.36096	-5.64618	0.913331	4	12.3639	0.0011399		SiJWB05BAJ_pcr_2	1.53263	1.35447	2.5695	2.96281	2.10485	0.783688	4	5.37166	0.0126314
SiJWC02AAZ_pcr_1	-4.33229	-4.89789	-6.86218	-6.40558	-5.62448	1.20274	4	9.35281	0.00258853		SiJWB01BAG_pcr_2	1.77573	1.95613	1.99445	2.70401	2.10758	0.408897	4	10.3086	0.00194693
SiJWC11AAN_pcr_2	-4.44744	-4.49695	-6.6827	-6.8635	-5.62265	1.33063	4	8.4511	0.00347746		SiJWC05BDF_pcr_1	1.69792	1.80921	2.66252	2.26256	2.10805	0.443031	4	9.5165	0.00246059
SiJWE09BAO_pcr_1	-4.88628	-4.95972	-6.94221	-5.68889	-5.61928	0.953463	4	11.7871	0.00131254		SiJWA12AAB_pcr_1	1.8134	1.48428	2.56943	2.56761	2.10868	0.547715	4	7.69992	0.0045525
SiJWB09ACO_pcr_2	-5.59321	-5.18032	-6.28903	-5.41293	-5.61887	0.477673	4	23.526	0.000168271		SiJWG01BEA_pcr_2	2.45658	2.27762	1.81964	1.88443	2.10957	0.307356	4	13.7272	0.000836547
SiJWC01BAG_pcr_2	-4.59522	-4.15355	-7.09493	-6.57236	-5.60401	1.44707	4	7.74532	0.00447596		SiJWC02BDN_pcr_1	3.1183	2.77159	1.77186	0.783591	2.11133	1.05326	4	4.00914	0.0278415
SiJWG03BCA_pcr_1	-4.07666	-5.09563	-6.60241	-6.61475	-5.59736	1.23955	4	9.03125	0.0028667		SiJWB07BCQ_pcr_1	2.31659	2.1209	1.95801	2.05225	2.11194	0.151896	4	27.8076	0.000102085
SiJWE10CAL_pcr_1	-3.93961	-3.95685	-7.47449	-6.98146	-5.5881	1.90424	4	5.86911	0.00986578		SiJWA11ABI_pcr_2	2.44053	2.32509	1.95591	1.7286	2.11253	0.328984	4	12.8428	0.00101881
SiJWE02ACM_pcr_2	-4.81504	-4.46006	-6.37994	-6.66153	-5.57914	1.10288	4	10.1174	0.00205683		SiJWB07CAW_pcr_1	3.14766	3.17271	1.29168	0.846121	2.11454	1.22107	4	3.46342	0.0405393
SiJWC04BAZ_pcr_1	-4.22124	-4.5505	-6.96351	-6.57743	-5.57817	1.39225	4	8.01318	0.00405722		SiJWC03BAM_pcr_1	2.07279	1.61345	2.21744	2.56256	2.11656	0.39333	4	10.7623	0.00171563
SiJWE01ADC_pcr_1	-4.96947	-4.48943	-7.13384	-5.60215	-5.54872	1.15081	4	9.64315	0.00236729		SiJWB02AAJ_pcr_2	1.91562	1.87658	2.41471	2.26005	2.11674	0.262962	4	16.0992	0.000521265
SiJWD11BAP_pcr_1	-4.57619	-4.70328	-6.17592	-6.73731	-5.54817	1.07497	4	10.3224	0.00193928		SiJWA10BAT_pcr_1	1.33575	1.89615	2.64833	2.58748	2.11693	0.622574	4	6.80056	0.00650164
SiJWC07BDU_pcr_1	-4.81452	-4.3646	-6.29622	-6.7105	-5.54646	1.13279	4	9.79257	0.00226315		SiJWE11BCS_pcr_1	2.22482	1.93197	2.19733	2.11972	2.11846	0.132052	4	32.0852	6.65333e-05
SiJWG09ADA_pcr_1	-4.44148	-4.75136	-6.76228	-6.21392	-5.54226	1.12202	4	9.87904	0.00220564		SiJWH03AAB_pcr_2	2.03511	2.2948	2.00293	2.14155	2.1186	0.13156	4	32.2072	6.57816e-05
SiJWE08BCN_pcr_1	-4.33445	-4.40059	-6.73346	-6.53317	-5.50042	1.31099	4	8.39126	0.00354992		SiJWH12CAG_pcr_1	0.803794	-0.0475488	3.98663	3.7486	2.12287	2.04673	4	2.0744	0.129695
SiJWA02BDO_pcr_1	-4.13793	-4.365	-7.30738	-6.1773	-5.4969	1.51314	4	7.26556	0.00538035		SiJWA08ACY_pcr_1	1.11628	1.39872	2.79169	3.19003	2.12418	1.02042	4	4.16334	0.02521
SiJWF07BBG_pcr_1	-4.80875	-4.65982	-6.35918	-6.10589	-5.48341	0.873294	4	12.558	0.00108864		SiJWF11BDP_pcr_1	1.88095	2.12594	2.2557	2.24158	2.12604	0.173425	4	24.5183	0.000148732
SiJWB07CAO_pcr_1	-4.70443	-4.52104	-6.30874	-6.36939	-5.4759	0.999811	4	10.9539	0.00162888		SiJWE10BCN_pcr_1	1.84053	2.06364	2.29047	2.31139	2.12651	0.221211	4	19.2261	0.000307317
SiJWG05CAI_pcr_1	-4.30405	-4.31838	-6.73952	-6.54126	-5.4758	1.3472	4	8.12918	0.00389192		SiJWF03BDT_pcr_1	0.813233	0.746349	3.23703	3.71265	2.12731	1.56829	4	2.71291	0.0729851
SiJWF11BDZ_pcr_1	-3.49366	-4.2792	-7.31345	-6.70576	-5.44802	1.84819	4	5.89553	0.00974213		SiJWG02ABJ_pcr_2	2.45222	2.68038	1.66105	1.72796	2.1304	0.512606	4	8.31205	0.00364895
SiJWC03BAQ_pcr_1	-4.61162	-4.96304	-6.37922	-5.82196	-5.44396	0.804503	4	13.5337	0.000872466		SiJWH01ACP_pcr_2	1.82757	1.9242	2.24738	2.5234	2.13064	0.317467	4	13.4228	0.000893995
SiJWG04ADC_pcr_1	-4.49611	-4.3523	-6.45853	-6.33519	-5.41053	1.14154	4	9.47938	0.00248885		SiJWF07BAR_pcr_1	1.97511	1.78846	2.40954	2.36226	2.13384	0.301476	4	14.156	0.000763667
SiJWD06AAH_pcr_2	-4.61733	-4.70953	-5.85734	-6.43806	-5.40557	0.889931	4	12.1483	0.00120069		SiJWE11CAM_pcr_1	2.0005	2.46238	2.01163	2.06675	2.13532	0.219961	4	19.4154	0.000298468
SiJWF11ABQ_pcr_2	-4.65729	-4.45505	-6.29032	-6.20549	-5.40204	0.980821	4	11.0153	0.00160228		SiJWF10CAT_pcr_1	1.03377	1.25221	3.058	3.19908	2.13576	1.15127	4	3.71028	0.0340348
SiJWG05BAQ_pcr_1	-4.33249	-4.36739	-6.8058	-6.03685	-5.38563	1.23652	4	8.71099	0.00318448		SiJWE07ABD_pcr_2	2.24711	2.83081	1.88961	1.58127	2.1372	0.536512	4	7.96703	0.00412556
SiJWB03BBD_pcr_1	-5.32454	-4.32298	-6.06297	-5.82088	-5.38284	0.770531	4	13.9718	0.000793898		SiJWB04ABE_pcr_2	1.07028	1.54201	3.22371	2.71792	2.13848	1.00172	4	4.26963	0.0235807
SiJWE02BAI_pcr_2	-3.71536	-4.1342	-6.7466	-6.86386	-5.36501	1.67248	4	6.41562	0.0076739		SiJWH01BDI_pcr_1	1.91374	2.59335	2.072	1.97636	2.13886	0.309903	4	13.8035	0.000822928
SiJWE05AEA_pcr_1	-4.01688	-3.84619	-6.89928	-6.60534	-5.34192	1.63448	4	6.53655	0.00727764		SiJWC03BCY_pcr_1	1.82941	1.70853	2.57869	2.4462	2.14071	0.435446	4	9.83228	0.0022365
SiJWE05ACY_pcr_1	-4.19751	-4.17573	-6.75172	-6.20128	-5.33156	1.34106	4	7.95128	0.00414922		SiJWE12ABK_pcr_2	1.71623	1.82374	2.34198	2.68889	2.14271	0.455211	4	9.41413	0.00253959
SiJWE08BBG_pcr_1	-4.43888	-5.20685	-6.11394	-5.56456	-5.33106	0.702101	4	15.186	0.000620013		SiJWG03AAK_pcr_2	0.828723	0.813193	3.7167	3.21556	2.14354	1.54085	4	2.78229	0.0688591
SiJWB02ABN_pcr_2	-4.25277	-4.21297	-6.37154	-6.38498	-5.30556	1.23876	4	8.56595	0.00334377		SiJWE10AAC_pcr_2	2.77154	2.78221	1.47144	1.55637	2.14539	0.730014	4	5.87766	0.00982551
SiJWG02ABK_pcr_2	-4.37214	-4.10191	-6.89311	-5.83838	-5.30139	1.30693	4	8.11272	0.00391482		SiJWH08BBY_pcr_1	1.18669	1.79568	3.04659	2.55605	2.14625	0.821016	4	5.22828	0.0136133
SiJWH03AAP_pcr_2	-3.91909	-3.91234	-6.49982	-6.86831	-5.29989	1.60537	4	6.60269	0.00707228		SiJWC12BCW_pcr_1	1.15918	1.47451	2.85806	3.09358	2.14634	0.971194	4	4.41999	0.0215007
SiJWG07AAR_pcr_2	-4.79542	-4.77864	-5.92554	-5.68838	-5.29699	0.596803	4	17.7512	0.000389804		SiJWB12BBS_pcr_1	3.33023	3.62506	0.964674	0.667051	2.14675	1.54627	4	2.77669	0.0691813
SiJWB09BBI_pcr_1	-4.35404	-3.84994	-6.6271	-6.35011	-5.2953	1.39778	4	7.57672	0.00476915		SiJWH01ACO_pcr_2	1.88271	2.08855	2.28314	2.3361	2.14762	0.2062	4	20.8305	0.000241981
SiJWC06BCP_pcr_1	-4.48694	-4.17625	-6.371	-6.11701	-5.2878	1.11622	4	9.4745	0.00249261		SiJWA10AAM_pcr_2	1.28947	1.1866	2.90407	3.21421	2.14859	1.05984	4	4.05453	0.0270316
SiJWH11CAT_pcr_1	-4.21068	-4.13254	-6.53646	-6.2653	-5.28625	1.29222	4	8.18168	0.00382003		SiJWF05AAX_pcr_1	1.89003	1.74071	2.42838	2.54756	2.15167	0.396081	4	10.8648	0.00166846
SiJWC07CAS_pcr_1	-6.25257	-5.2923	-4.95576	-4.59314	-5.27344	0.712456	4	14.8036	0.00066878		SiJWG07BDT_pcr_1	1.36931	2.43964	2.53864	2.2621	2.15242	0.534461	4	8.05456	0.0039972
SiJWE06BCF_pcr_1	-4.07821	-3.93984	-6.70123	-6.31501	-5.25857	1.45254	4	7.24051	0.00543396		SiJWB08ACA_pcr_2	2.05129	1.91221	2.1418	2.50556	2.15271	0.253475	4	16.9856	0.000444464
SiJWH11ACS_pcr_2	-3.94316	-4.06084	-6.50991	-6.43415	-5.23702	1.42722	4	7.33878	0.00522764		SiJWH03ACS_pcr_1	0.994718	0.849463	2.92506	3.84519	2.15361	1.47201	4	2.92608	0.0611942
SiJWD08BAV_pcr_1	-4.4143	-3.94798	-6.54041	-5.95232	-5.21375	1.2311	4	8.47007	0.0034549		SiJWF01BBX_pcr_1	1.85595	1.91576	2.36737	2.47871	2.15445	0.314409	4	13.7047	0.000840611
SiJWE07ADF_pcr_1	-4.9442	-5.09771	-5.15153	-5.52422	-5.17941	0.246084	4	42.0947	2.95058e-05		SiJWA04BAJ_pcr_2	2.20562	2.32435	1.96492	2.12751	2.1556	0.150696	4	28.6086	9.37718e-05
SiJWH05BBO_pcr_1	-3.49697	-4.14435	-6.47243	-6.57504	-5.1722	1.58339	4	6.53306	0.00728871		SiJWG09BAW_pcr_1	2.27283	4.97839	0.907213	0.471351	2.15745	2.03118	4	2.12433	0.123674
SiJWC03CAQ_pcr_1	-4.57567	-4.28352	-6.17301	-5.63156	-5.16594	0.886585	4	11.6536	0.00135737		SiJWF04BAP_pcr_1	1.14218	1.17555	3.20874	3.10343	2.15747	1.15398	4	3.7392	0.0333629
SiJWA06ADD_pcr_1	-5.16391	-4.29819	-5.60597	-5.56852	-5.15915	0.607865	4	16.9746	0.000445317		SiJWB06BBT_pcr_1	NA	2.68509	1.85775	1.93327	2.15871	0.457426	3	8.17398	0.0146391
SiJWH02BDF_pcr_1	-4.39459	-4.07105	-6.13508	-5.95545	-5.13904	1.05726	4	9.72139	0.00231198		SiJWD08CAU_pcr_1	1.88987	2.05663	2.57978	2.11859	2.16122	0.295285	4	14.6382	0.000691453
SiJWD05AAD_pcr_2	-3.5962	-3.66235	-6.40717	-6.85749	-5.1308	1.74374	4	5.88482	0.00979202		SiJWA08ABE_pcr_2	1.57249	0.477177	3.57587	3.02203	2.16189	1.40533	4	3.07671	0.0542757
SiJWC09ACC_pcr_2	-4.27992	-4.63303	-5.80937	-5.78817	-5.12762	0.788317	4	13.009	0.000980785		SiJWE02ACC_pcr_2	2.32088	3.25156	1.55221	1.5753	2.17499	0.801618	4	5.4265	0.0122804
SiJWB02ACU_pcr_2	-4.43237	-4.17276	-6.15338	-5.66106	-5.10489	0.953905	4	10.7031	0.00174363		SiJWB06AAK_pcr_2	2.49584	2.30919	1.98928	1.90899	2.17583	0.27459	4	15.8478	0.000546224
SiJWA05ACU_pcr_2	-4.2713	-4.5237	-5.9578	-5.65992	-5.10318	0.830292	4	12.2925	0.00115958		SiJWA06BAH_pcr_2	1.94916	1.67858	2.48608	2.59436	2.17704	0.435912	4	9.98847	0.00213561
SiJWC08BDT_pcr_1	-4.89948	-4.62047	-5.55548	-5.31651	-5.09799	0.418123	4	24.3851	0.000151173		SiJWG12BCH_pcr_1	2.2002	1.82144	2.53682	2.16046	2.17973	0.292506	4	14.9039	0.000655512
SiJWF07BBZ_pcr_1	-4.46502	-3.84273	-6.0397	-5.9567	-5.07604	1.09523	4	9.26934	0.00265717		SiJWA11BDG_pcr_1	1.06577	1.35401	3.19733	3.11235	2.18236	1.1296	4	3.86396	0.0306512
SiJWD12ABP_pcr_2	-4.26909	-4.0755	-5.63263	-6.28841	-5.06641	1.0695	4	9.47432	0.00249274		SiJWB12AAP_pcr_2	2.6546	1.65576	2.57321	1.84922	2.18319	0.504668	4	8.65201	0.00324802
SiJWE11ADO_pcr_1	-4.48083	-4.01698	-5.88111	-5.84148	-5.0551	0.95012	4	10.641	0.00177373		SiJWF11ADH_pcr_1	2.41052	2.35841	2.12302	1.84098	2.18323	0.260199	4	16.7813	0.000460758
SiJWG10CAA_pcr_1	-3.1126	-3.30408	-7.43112	-6.36803	-5.05396	2.17628	4	4.64458	0.0188156		SiJWF12AAL_pcr_2	1.09634	1.18984	3.12813	3.32638	2.18517	1.20661	4	3.622	0.0361965
SiJWB07ADP_pcr_1	-4.41589	-4.42267	-5.784	-5.58312	-5.05142	0.734529	4	13.7542	0.000831694		SiJWA03BCS_pcr_1	1.92679	1.7479	2.57019	2.52115	2.19151	0.415906	4	10.5385	0.00182489
SiJWF06BAY_pcr_1	-5.08238	-5.26403	-5.00882	-4.83103	-5.04656	0.179304	4	56.2904	1.23502e-05		SiJWH10BBN_pcr_1	0.815622	1.16874	2.90656	3.87636	2.19182	1.44789	4	3.02761	0.0564176
SiJWF01ABL_pcr_2	-4.05213	-4.07196	-5.81853	-6.22886	-5.04287	1.14491	4	8.80922	0.00308226		SiJWB06ACB_pcr_2	1.60085	1.7307	2.61755	2.82059	2.19242	0.616028	4	7.11792	0.00570665
SiJWG02BBB_pcr_1	-4.5428	-4.74439	-5.55282	-5.32407	-5.04102	0.475489	4	21.2035	0.000229498		SiJWC04BAA_pcr_2	1.81519	1.37594	2.57839	3.00419	2.19343	0.734139	4	5.9755	0.00938007
SiJWF08BBQ_pcr_1	-3.46622	-2.88118	-7.33585	-6.45232	-5.03389	2.1911	4	4.59486	0.0193708		SiJWC08AAC_pcr_2	1.04495	1.03374	3.32327	3.37523	2.1943	1.3338	4	3.29029	0.046068
SiJWB11BBX_pcr_1	-5.04174	-3.55113	-5.81278	-5.70863	-5.02857	1.04251	4	9.64705	0.00236449		SiJWH08AAO_pcr_2	2.46154	2.24128	2.12414	1.95092	2.19447	0.214306	4	20.4798	0.000254555
SiJWD05ABK_pcr_2	-3.6635	-3.53348	-6.19893	-6.71727	-5.02829	1.66535	4	6.03873	0.00910624		SiJWD07BDJ_pcr_1	1.60393	1.98918	2.63955	2.55154	2.19605	0.488697	4	8.98737	0.00290769
SiJWA10ABH_pcr_2	-3.47498	-3.54973	-6.5792	-6.41002	-5.00348	1.72346	4	5.80632	0.0101679		SiJWG07ACY_pcr_1	2.20623	2.01998	2.18569	2.37433	2.19656	0.144909	4	30.3164	7.8839e-05
SiJWH11ABP_pcr_2	-4.14727	-3.96464	-5.58427	-6.2831	-4.99482	1.1235	4	8.89155	0.0029999		SiJWB06BDQ_pcr_1	1.48669	1.51842	2.8381	2.94643	2.19741	0.803672	4	5.46843	0.0120205
SiJWF02CAK_pcr_1	-3.44912	-2.81523	-6.84269	-6.84704	-4.98852	2.15909	4	4.62094	0.0190769		SiJWB10BAN_pcr_1	2.30403	2.02913	2.24693	2.21346	2.19839	0.118872	4	36.9875	4.34676e-05
SiJWD01BDJ_pcr_1	-4.5138	-4.34588	-5.08056	-6.00264	-4.98572	0.74727	4	13.3438	0.000909743		SiJWF09BBL_pcr_1	1.84044	1.2484	2.56103	3.16279	2.20317	0.835086	4	5.2765	0.0132723
SiJWA09BCM_pcr_1	-4.47876	-4.57322	-5.61941	-5.2453	-4.97917	0.546486	4	18.2225	0.000360543		SiJWE03BCR_pcr_1	1.00793	0.886752	3.45292	3.47468	2.20557	1.45375	4	3.03433	0.0561184
SiJWA03BCG_pcr_1	-4.28583	-4.50165	-5.94982	-5.17915	-4.97911	0.750755	4	13.2643	0.000925983		SiJWA09CAE_pcr_1	2.27313	1.88522	2.32358	2.34599	2.20698	0.216662	4	20.3726	0.00025857
SiJWG04ABQ_pcr_2	-4.78402	-5.15112	-4.99528	-4.95793	-4.97209	0.150734	4	65.9718	7.67426e-06		SiJWC01BCO_pcr_1	1.23779	0.794406	3.57479	3.22414	2.20778	1.39525	4	3.1647	0.0506872
SiJWF06ACY_pcr_1	-5.52303	-5.38862	-4.39342	-4.58046	-4.97138	0.567235	4	17.5285	0.000404739		SiJWE01ADH_pcr_1	2.13036	2.38317	2.05969	2.25909	2.20808	0.142963	4	30.8903	7.45366e-05
SiJWD02BDQ_pcr_1	-4.43653	-3.98523	-5.74135	-5.68372	-4.96171	0.886651	4	11.192	0.00152898		SiJWC03AAW_pcr_2	2.30032	2.27671	2.19508	2.07131	2.21085	0.103377	4	42.7724	2.81271e-05
SiJWF04BCT_pcr_1	-4.30688	-4.16141	-5.82491	-5.45936	-4.93814	0.828619	4	11.919	0.00127016		SiJWG12AAM_pcr_2	1.64203	1.56971	2.87377	2.76047	2.2115	0.701462	4	6.30539	0.00806017
SiJWH05ADQ_pcr_1	-3.69042	-3.59841	-6.74667	-5.71517	-4.93767	1.55201	4	6.36292	0.00785547		SiJWF09BBU_pcr_1	1.50817	1.96252	2.47347	2.90289	2.21176	0.606442	4	7.29423	0.00531986
SiJWC04BDD_pcr_1	-3.38234	-3.02315	-6.85014	-6.4948	-4.93761	2.01384	4	4.90368	0.016234		SiJWG10BAV_pcr_1	1.19349	2.04216	2.77761	2.83437	2.21191	0.768867	4	5.75367	0.0104307
SiJWC03BCV_pcr_1	-3.28497	-3.44256	-6.84427	-6.14728	-4.92977	1.83165	4	5.38289	0.0125585		SiJWB05BDK_pcr_1	1.74653	2.03218	2.47524	2.59496	2.21223	0.393681	4	11.2387	0.00151037
SiJWE01BBG_pcr_1	-3.34158	-3.54184	-6.79301	-5.98219	-4.91465	1.73465	4	5.66644	0.010886		SiJWB03ACR_pcr_2	2.3788	2.28484	2.20927	1.97866	2.21289	0.170861	4	25.9029	0.000126212
SiJWG01CAM_pcr_1	-5.8135	-5.55341	-4.05541	-4.17525	-4.89939	0.912872	4	10.734	0.00172893		SiJWC01BCE_pcr_1	2.03434	2.56461	2.05826	2.20238	2.2149	0.244668	4	18.1054	0.000367536
SiJWA06BBS_pcr_1	-3.9932	-3.84122	-5.87363	-5.83709	-4.88629	1.12081	4	8.71918	0.00317579		SiJWE06BCI_pcr_1	2.24385	2.60815	2.03578	1.97254	2.21508	0.286535	4	15.4612	0.000587816
SiJWB02BDH_pcr_1	-2.8904	-2.74186	-7.05243	-6.78581	-4.86763	2.37213	4	4.104	0.026183		SiJWD09ADC_pcr_1	1.62802	1.61204	2.86599	2.75947	2.21638	0.690008	4	6.42421	0.00764483
SiJWH03BAT_pcr_1	-3.91951	-4.12825	-6.01255	-5.39572	-4.86401	1.00586	4	9.6713	0.00234719		SiJWD04CAK_pcr_1	1.87794	2.09713	2.33489	2.56159	2.21789	0.295506	4	15.0108	0.000641753
SiJWH03BCU_pcr_1	-4.38795	-4.75699	-4.91588	-5.34003	-4.85021	0.394382	4	24.5965	0.000147323		SiJWC04BCE_pcr_1	2.44413	1.81963	2.16263	2.44773	2.21853	0.297586	4	14.9102	0.000654684
SiJWB07BDZ_pcr_1	-3.83951	-3.78948	-5.62799	-6.13281	-4.84745	1.2106	4	8.00835	0.0040643		SiJWE08ADY_pcr_1	2.52137	2.45843	1.87991	2.03598	2.22392	0.314714	4	14.133	0.000767356
SiJWG08BDJ_pcr_1	-4.43281	-5.09995	-4.89567	-4.92954	-4.83949	0.285477	4	33.9046	5.64075e-05		SiJWH10BDF_pcr_1	1.68316	1.51015	2.85093	2.85612	2.22509	0.729085	4	6.10379	0.0088353
SiJWH09BBE_pcr_1	-3.70195	-4.2047	-5.58053	-5.84955	-4.83419	1.04343	4	9.26599	0.00265998		SiJWG06CAG_pcr_1	0.95389	0.881177	3.62176	3.44549	2.22558	1.51241	4	2.9431	0.0603593
SiJWH11ABQ_pcr_2	-3.67338	-4.00238	-6.04858	-5.55947	-4.82095	1.16038	4	8.30923	0.00365254		SiJWG09AAZ_pcr_1	2.03379	2.47003	2.15519	2.26455	2.23089	0.185202	4	24.0914	0.000156747
SiJWC05BCJ_pcr_1	-3.62343	-3.45541	-6.2875	-5.89542	-4.81544	1.48368	4	6.49121	0.00742298		SiJWG08BAG_pcr_2	1.47304	1.66649	2.97945	2.82527	2.23606	0.775974	4	5.76324	0.0103823
SiJWA05BBC_pcr_1	-4.67387	-4.17763	-5.7922	-4.57289	-4.80415	0.692634	4	13.8721	0.00081092		SiJWB10BCP_pcr_1	1.74209	1.82403	2.62226	2.76255	2.23773	0.529182	4	8.45733	0.00347003
SiJWC01BAM_pcr_1	-3.69564	-4.18307	-5.40898	-5.90931	-4.79925	1.03306	4	9.2913	0.00263889		SiJWD04BAD_pcr_1	2.34017	2.45999	2.09572	2.05528	2.23779	0.19438	4	23.0249	0.000179446
SiJWA01AAJ_pcr_2	-4.6948	-4.1001	-4.66028	-5.71179	-4.79174	0.671204	4	14.2781	0.000744468		SiJWF08BBR_pcr_1	0.681197	0.677205	3.64607	3.94894	2.23835	1.8046	4	2.48073	0.0892127
SiJWF02AAQ_pcr_2	-4.9302	-4.8401	-4.6662	-4.71114	-4.78691	0.120657	4	79.3472	4.41191e-06		SiJWE11ADF_pcr_1	2.34512	2.53727	2.0896	1.98815	2.24003	0.248643	4	18.018	0.000372866
SiJWC08BCZ_pcr_1	-3.46683	-3.53983	-6.55909	-5.55108	-4.77921	1.52994	4	6.24755	0.00827309		SiJWA08BDE_pcr_1	1.29768	0.674263	3.38579	3.60394	2.24042	1.47339	4	3.04117	0.0558159
SiJWG11ADA_pcr_1	-3.93756	-3.89268	-5.78385	-5.46769	-4.77045	0.996211	4	9.57719	0.00241529		SiJWD07BCZ_pcr_1	1.39602	1.59174	3.49876	2.47563	2.24054	0.961343	4	4.66127	0.0186339
SiJWD04BBT_pcr_1	-3.67925	-3.91887	-5.58602	-5.8553	-4.75986	1.11915	4	8.50619	0.00341247		SiJWB10ACA_pcr_2	2.05217	2.12569	2.31725	2.47162	2.24168	0.189694	4	23.6347	0.00016597
SiJWA10ABU_pcr_2	-4.02985	-4.52329	-5.15903	-5.30554	-4.75443	0.590443	4	16.1046	0.000520744		SiJWA01BCV_pcr_1	1.19488	1.73675	2.93137	3.11604	2.24476	0.929316	4	4.831	0.0169091
SiJWF03AAE_pcr_2	-3.2475	-3.11365	-6.50046	-6.10459	-4.74155	1.81051	4	5.23779	0.0135451		SiJWG03BCM_pcr_1	1.91982	1.79929	2.52773	2.74349	2.24758	0.459277	4	9.78748	0.00226659
SiJWB09BAN_pcr_1	-4.734	-4.86362	-4.76172	-4.60493	-4.74107	0.106506	4	89.0294	3.12373e-06		SiJWC08BCH_pcr_1	1.80002	1.50295	2.66881	3.0191	2.24772	0.713548	4	6.30011	0.0080793
SiJWC09BDX_pcr_1	-5.00342	-5.04205	-4.35152	-4.55451	-4.73787	0.339575	4	27.9047	0.000101026		SiJWF04BAA_pcr_2	1.64431	1.7043	2.69205	2.95203	2.24817	0.671541	4	6.69557	0.00679655
SiJWF07ACS_pcr_2	-4.71566	-4.81974	-4.61517	-4.75191	-4.72562	0.0853407	4	110.747	1.6231e-06		SiJWE02AAM_pcr_2	1.38728	1.47047	2.92741	3.21997	2.25128	0.957717	4	4.70135	0.0182067
SiJWF08BDL_pcr_1	-3.12314	-3.3208	-6.20217	-6.17797	-4.70602	1.71556	4	5.48627	0.0119121		SiJWB11CAE_pcr_1	1.62431	1.78786	2.82523	2.77573	2.25328	0.635689	4	7.08925	0.00577303
SiJWE07CAV_pcr_1	NA	-2.98136	-5.15527	-5.97572	-4.70412	1.54733	3	5.26571	0.0342243		SiJWF08AAS_pcr_2	1.91414	1.89324	2.24738	2.96453	2.25482	0.500183	4	9.016	0.00288087
SiJWG04BBV_pcr_1	-3.6244	-3.82743	-5.63828	-5.67699	-4.69177	1.11847	4	8.38965	0.00355191		SiJWA07ADX_pcr_1	1.95287	2.28572	2.40459	2.3779	2.25527	0.20793	4	21.6926	0.0002144
SiJWC02BAW_pcr_1	-3.11763	-3.20357	-6.17773	-6.25987	-4.6897	1.76632	4	5.31013	0.013041		SiJWH07ADP_pcr_1	2.26895	2.20736	2.31675	2.23306	2.25653	0.0474332	4	95.1457	2.55935e-06
SiJWF04ABD_pcr_2	-4.27348	-4.42023	-5.18619	-4.87233	-4.68806	0.41861	4	22.3982	0.00019486		SiJWA12BCL_pcr_1	1.26232	1.33245	3.22828	3.20506	2.25703	1.10851	4	4.07219	0.0267248
SiJWH08BBG_pcr_1	-4.00859	-3.99777	-5.08973	-5.65404	-4.68753	0.823129	4	11.3895	0.00145221		SiJWB12ACW_pcr_2	1.49221	2.0205	2.19104	3.33616	2.25998	0.776686	4	5.81954	0.0101033
SiJWF05BAZ_pcr_1	-3.67252	-3.82121	-6.25279	-4.99527	-4.68545	1.20076	4	7.80415	0.00437926		SiJWA08BAP_pcr_1	1.01121	0.973944	3.40417	3.65086	2.26004	1.46709	4	3.081	0.0540937
SiJWH04ADB_pcr_1	-3.53839	-3.17008	-6.06302	-5.97029	-4.68544	1.54495	4	6.0655	0.00899344		SiJWD06BCY_pcr_1	0.555605	0.890192	3.6042	3.9925	2.26062	1.7879	4	2.5288	0.0855137
SiJWE03BDE_pcr_1	-4.41672	-4.2438	-4.65383	-5.42077	-4.68378	0.519279	4	18.0395	0.000371544		SiJWD02BCE_pcr_1	2.61017	1.60988	2.43365	2.39102	2.26118	0.444444	4	10.1753	0.00202269
SiJWC06BCR_pcr_1	-4.16066	-4.32046	-5.3292	-4.92215	-4.68311	0.541307	4	17.303	0.00042064		SiJWE03BDP_pcr_1	1.41803	1.333	3.10255	3.19768	2.26281	1.02589	4	4.41142	0.0216128
SiJWC04BCB_pcr_1	-2.55399	-2.81503	-6.54818	-6.74013	-4.66433	2.28992	4	4.07379	0.0266971		SiJWC06CAV_pcr_1	0.142895	1.29396	3.5952	4.039	2.26777	1.85856	4	2.44035	0.0924717
SiJWD06CAA_pcr_1	-3.65897	-3.45535	-6.08393	-5.45471	-4.66324	1.30542	4	7.14444	0.00564616		SiJWC06BCC_pcr_1	2.15049	1.91697	2.45617	2.54991	2.26839	0.289776	4	15.6562	0.000566335
SiJWH02BCM_pcr_1	-4.34753	-4.72525	-4.89152	-4.68345	-4.66194	0.228059	4	40.8836	3.22025e-05		SiJWE03BBY_pcr_1	1.21585	1.81079	3.00789	3.04771	2.27056	0.907639	4	5.00322	0.0153653
SiJWE06ACM_pcr_2	-3.5955	-3.85363	-6.18106	-5.01423	-4.6611	1.18638	4	7.85769	0.00429366		SiJWB05AAH_pcr_2	1.38912	1.54636	3.03011	3.12763	2.2733	0.933247	4	4.87182	0.0165256
SiJWE07AAI_pcr_2	-5.18584	-4.7428	-4.30991	-4.3745	-4.65326	0.403011	4	23.0925	0.000177883		SiJWC11AAP_pcr_2	2.07087	2.12734	2.38521	2.51857	2.2755	0.212087	4	21.4582	0.000221466
SiJWG01ABA_pcr_2	-4.12859	-4.15397	-4.75731	-5.51524	-4.63878	0.652573	4	14.2169	0.000754008		SiJWE12ADF_pcr_1	2.13161	2.29241	2.44341	2.23957	2.27675	0.129704	4	35.1068	5.08196e-05
SiJWB09ADK_pcr_1	-4.10255	-3.56516	-5.86402	-4.96376	-4.62387	1.00766	4	9.17743	0.00273558		SiJWA10BCQ_pcr_1	1.89766	2.02109	2.54391	2.64809	2.27769	0.373422	4	12.199	0.00118601
SiJWC05ACU_pcr_2	-5.43585	-5.89288	-3.62601	-3.44438	-4.59978	1.24557	4	7.38585	0.00513247		SiJWA08BBV_pcr_1	2.5674	2.89956	1.61	2.0364	2.27834	0.569995	4	7.99423	0.00408509
SiJWA06CAG_pcr_1	-5.08736	-4.96695	-4.64926	-3.68863	-4.59805	0.633819	4	14.509	0.000709869		SiJWH12BCF_pcr_1	2.64816	2.57806	1.90706	1.98671	2.28	0.387077	4	11.7806	0.00131468
SiJWF07ACS_pcr_1	-4.65922	-4.71633	-4.48234	-4.52392	-4.59545	0.110437	4	83.2228	3.82401e-06		SiJWG12BAH_pcr_2	3.07218	2.07157	2.12713	1.84997	2.28021	0.541383	4	8.42365	0.00351045
SiJWC01ACH_pcr_2	-4.45282	-4.22318	-5.4336	-4.23141	-4.58525	0.57548	4	15.9354	0.000537352		SiJWE12BBD_pcr_1	2.83831	2.04386	2.13622	2.10647	2.28122	0.373383	4	12.2192	0.00118024
SiJWE04ADM_pcr_1	-3.73276	-3.51401	-5.18267	-5.88871	-4.57954	1.14456	4	8.00224	0.00407328		SiJWA08BBA_pcr_1	2.65323	1.90482	2.23618	2.33723	2.28286	0.308342	4	14.8074	0.000668272
SiJWF11BCE_pcr_1	-3.9061	-3.95131	-5.26208	-5.17949	-4.57474	0.746971	4	12.2488	0.00117184		SiJWH03AAB_pcr_1	1.8472	2.60024	2.22598	2.46514	2.28464	0.330137	4	13.8405	0.000816412
SiJWE02CAI_pcr_1	-3.73506	-3.80418	-4.98648	-5.7559	-4.5704	0.976974	4	9.35624	0.00258576		SiJWG03BCE_pcr_1	2.45282	2.67486	1.97226	2.04354	2.28587	0.334795	4	13.6553	0.000849653
SiJWD11ACR_pcr_2	-3.88243	-4.00202	-5.12078	-5.25963	-4.56621	0.724394	4	12.607	0.00107618		SiJWA11BAZ_pcr_1	2.52158	2.02238	2.3988	2.20182	2.28614	0.219701	4	20.8114	0.000242644
SiJWG01BBU_pcr_1	-5.35734	-4.65646	-4.41153	-3.80226	-4.5569	0.643227	4	14.1689	0.000761608		SiJWB02ACO_pcr_2	1.2399	3.92057	1.55208	2.45421	2.29169	1.2018	4	3.81377	0.0317069
SiJWF01BAQ_pcr_1	-5.98737	-3.77026	-4.33607	-4.10349	-4.5493	0.986433	4	9.22373	0.00269571		SiJWG05BCB_pcr_1	1.62599	1.55262	3.01687	2.97565	2.29278	0.813034	4	5.64007	0.0110288
SiJWB11ACR_pcr_2	-5.94634	-7.18058	-2.79734	-2.26745	-4.54793	2.39106	4	3.80411	0.0319153		SiJWC01BAL_pcr_1	0.695523	1.04607	3.78711	3.67051	2.2998	1.65695	4	2.77595	0.0692242
SiJWC03BDQ_pcr_1	-3.54511	-4.00459	-5.47013	-5.13399	-4.53845	0.911855	4	9.95433	0.00215713		SiJWF06BCL_pcr_1	1.52384	3.03312	2.14436	2.49845	2.29994	0.633374	4	7.26251	0.00538684
SiJWA11AAP_pcr_2	-4.8966	-4.90919	-4.02518	-4.30887	-4.53496	0.440388	4	20.5953	0.00025032		SiJWG12ACV_pcr_2	1.97099	2.13089	2.5816	2.52167	2.30128	0.297364	4	15.4779	0.000585933
SiJWA07ACP_pcr_2	-3.50574	-3.76986	-5.35896	-5.49143	-4.5315	1.03898	4	8.723	0.00317174		SiJWG08AAX_pcr_2	1.6962	1.68496	2.96426	2.86073	2.30154	0.706751	4	6.51301	0.00735264
SiJWH05BDQ_pcr_1	-4.07441	-4.20791	-4.89521	-4.87578	-4.51333	0.433259	4	20.8343	0.000241848		SiJWC03BDL_pcr_1	1.90006	2.58524	2.13584	2.59133	2.30312	0.343072	4	13.4264	0.000893268
SiJWA03ABL_pcr_2	-3.83961	-3.59738	-5.49808	-5.05095	-4.4965	0.922044	4	9.75334	0.00228989		SiJWF08BBF_pcr_1	1.66308	1.56651	2.86369	3.1192	2.30312	0.802596	4	5.73917	0.0105046
SiJWA05BAG_pcr_2	-2.73866	-3.24184	-6.15984	-5.84102	-4.49534	1.75486	4	5.1233	0.0143961		SiJWC01ADT_pcr_1	1.14097	0.796218	3.68447	3.62192	2.3109	1.55654	4	2.96927	0.0591027
SiJWB11BBS_pcr_1	-3.57233	-3.22239	-5.3777	-5.75346	-4.48147	1.26925	4	7.06158	0.00583805		SiJWA04CAJ_pcr_1	2.69788	2.9749	4.57072	-0.987831	2.31392	2.35082	4	1.96861	0.143642
SiJWC01BCW_pcr_1	-3.16609	-3.43692	-5.65993	-5.64422	-4.47679	1.36161	4	6.5757	0.00715514		SiJWH02AAZ_pcr_2	1.92088	1.86388	2.65012	2.83216	2.31676	0.496179	4	9.33841	0.00260021
SiJWC04ABF_pcr_2	-3.26658	-3.28769	-5.59834	-5.73853	-4.47278	1.38183	4	6.47372	0.00748009		SiJWE06AAW_pcr_2	1.99071	2.07248	2.56917	2.65319	2.32138	0.33803	4	13.7348	0.000835176
SiJWD04ACU_pcr_2	-4.38368	-4.52128	-4.57471	-4.35114	-4.4577	0.10734	4	83.0574	3.84689e-06		SiJWG12BDI_pcr_1	2.23352	2.07371	2.39725	2.58966	2.32354	0.221186	4	21.0097	0.000235873
SiJWG12ABO_pcr_2	-3.01094	-3.17132	-5.94319	-5.67837	-4.45096	1.57527	4	5.65104	0.0109691		SiJWA11BBE_pcr_1	1.21793	1.3237	3.43865	3.31661	2.32422	1.21816	4	3.81596	0.0316598
SiJWD03AAX_pcr_1	-3.59203	-3.43893	-5.1997	-5.56389	-4.44864	1.08952	4	8.16622	0.00384101		SiJWA03BAE_pcr_1	1.92992	2.36092	2.7736	2.2386	2.32576	0.349324	4	13.3158	0.000915424
SiJWH02AAX_pcr_1	NA	-4.06351	-4.65995	-4.61385	-4.44577	0.331852	3	23.204	0.00185211		SiJWH02AAZ_pcr_1	2.09134	1.85251	2.75009	2.6094	2.32583	0.424037	4	10.97	0.00162186
SiJWG04ABR_pcr_2	-3.05272	-2.90399	-5.84186	-5.98259	-4.44529	1.69594	4	5.24228	0.0135131		SiJWH04BBL_pcr_1	1.9953	2.88987	2.26677	2.157	2.32723	0.391314	4	11.8945	0.00127789
SiJWB08AAG_pcr_2	-4.06828	-3.90968	-5.06491	-4.73487	-4.44443	0.546748	4	16.2577	0.000506302		SiJWE01ADM_pcr_1	1.77179	2.45403	2.85659	2.22662	2.32726	0.45275	4	10.2806	0.00196256
SiJWH03ABR_pcr_2	-3.63941	-3.47688	-4.83023	-5.72331	-4.41746	1.0592	4	8.34116	0.00361214		SiJWB09ADP_pcr_1	2.22877	2.70492	1.84075	2.53597	2.3276	0.379729	4	12.2593	0.00116888
SiJWC11BAZ_pcr_1	-3.75518	-3.63582	-5.36902	-4.79815	-4.38954	0.836034	4	10.5009	0.00184415		SiJWE07ADC_pcr_1	2.08062	2.5417	2.06509	2.62602	2.32836	0.297097	4	15.674	0.000564418
SiJWH09ADQ_pcr_1	-4.60802	-4.89585	-4.03033	-3.98648	-4.38017	0.44543	4	19.6672	0.000287223		SiJWG02ADX_pcr_1	3.65731	3.26945	1.20109	1.1879	2.32894	1.31949	4	3.53006	0.0386376
SiJWG03AAA_pcr_2	-2.99983	-3.00559	-5.71738	-5.79188	-4.37867	1.58911	4	5.51083	0.011765		SiJWD08CAL_pcr_1	1.95338	2.24699	2.57809	2.53757	2.32901	0.290613	4	16.0282	0.000528154
SiJWC11BDB_pcr_1	-2.40017	-2.54395	-6.43826	-6.12615	-4.37713	2.20425	4	3.97153	0.0285365		SiJWH06BDJ_pcr_1	2.40742	2.23726	2.21805	2.45891	2.33041	0.120757	4	38.5967	3.82624e-05
SiJWE12BBU_pcr_1	-3.49647	-2.54037	-5.95126	-5.44859	-4.35917	1.60975	4	5.41596	0.0123468		SiJWC10ACN_pcr_2	1.50955	2.11104	2.83624	2.86699	2.33096	0.649541	4	7.17724	0.00557251
SiJWB03BBO_pcr_1	-4.26526	-3.55962	-4.65725	-4.93959	-4.35543	0.598268	4	14.5601	0.000702505		SiJWB08BAQ_pcr_1	1.73784	1.93495	2.70471	2.96488	2.33559	0.591628	4	7.89548	0.00423455
SiJWE05ACJ_pcr_2	-3.1947	-3.08474	-5.37175	-5.76986	-4.35526	1.41368	4	6.16159	0.00860343		SiJWG08AAX_pcr_1	2.24796	1.71494	2.65488	2.72816	2.33649	0.465094	4	10.0474	0.00209912
SiJWF07ACT_pcr_2	-3.54827	-3.53165	-5.65464	-4.65224	-4.3467	1.01749	4	8.54395	0.00336885		SiJWE03ABL_pcr_2	1.33434	1.29873	3.46186	3.25378	2.33718	1.18169	4	3.95567	0.0288363
SiJWB01ACX_pcr_1	-3.24655	-3.16117	-5.39939	-5.55829	-4.34135	1.31552	4	6.60019	0.0070799		SiJWB08ABW_pcr_2	2.07435	1.64408	2.63725	2.99731	2.33825	0.598688	4	7.81124	0.0043678
SiJWF04BAZ_pcr_1	-4.48101	-4.73821	-4.03765	-4.08662	-4.33587	0.333668	4	25.9891	0.000124964		SiJWC10MAA_pcr_1	1.66703	2.35694	2.5576	2.77537	2.33924	0.479605	4	9.75484	0.00228886
SiJWH07BAX_pcr_1	-4.32166	-4.40371	-4.00012	-4.60229	-4.33194	0.250633	4	34.568	5.3228e-05		SiJWD10BCM_pcr_1	1.32378	1.21418	3.11437	3.70599	2.33958	1.26039	4	3.71246	0.0339836
SiJWH11ACS_pcr_1	NA	-3.08393	-4.4642	-5.4214	-4.32318	1.17509	3	6.37222	0.0237534		SiJWA12ADO_pcr_1	2.93257	2.86198	1.92526	1.64765	2.34187	0.651906	4	7.18467	0.00555599
SiJWA02BAF_pcr_1	-3.61999	-4.68636	-4.48632	-4.46747	-4.31503	0.473828	4	18.2135	0.000361076		SiJWD04AAA_pcr_1	2.66711	2.04666	2.21793	2.43883	2.34263	0.269375	4	17.3931	0.000414185
SiJWG08BCW_pcr_1	-3.84256	-3.57257	-4.9936	-4.84922	-4.31449	0.711874	4	12.1215	0.00120855		SiJWE03BBU_pcr_1	1.46836	1.65368	3.01641	3.23278	2.34281	0.910193	4	5.14793	0.0142073
SiJWE12BBH_pcr_1	-4.78276	-4.27037	-4.12983	-4.05391	-4.30922	0.328181	4	26.2612	0.000121134		SiJWC03BAL_pcr_1	2.44718	1.74009	2.63736	2.56982	2.34861	0.41325	4	11.3665	0.00146088
SiJWA11BBP_pcr_1	-4.58591	-4.12482	-4.51502	-3.97996	-4.30143	0.295004	4	29.1618	8.85506e-05		SiJWH07BCF_pcr_1	1.40133	1.8694	3.04325	3.08633	2.35008	0.847294	4	5.54725	0.0115512
SiJWH11BBJ_pcr_1	-3.4743	-3.17757	-5.02708	-5.44035	-4.27982	1.12087	4	7.63661	0.00466218		SiJWB02ACR_pcr_2	1.57369	1.56958	3.25408	3.01021	2.35189	0.906449	4	5.18924	0.0138978
SiJWA04BCH_pcr_1	-3.68441	-3.98735	-4.71364	-4.72665	-4.27801	0.525327	4	16.2871	0.000503593		SiJWG07BDS_pcr_1	1.61884	1.96913	2.91583	2.90792	2.35293	0.661076	4	7.11849	0.00570537
SiJWA07BBW_pcr_1	-3.34986	-3.64088	-5.38831	-4.733	-4.27801	0.949944	4	9.00688	0.00288937		SiJWA01ACL_pcr_2	1.2735	0.670541	3.98107	3.49883	2.35598	1.62885	4	2.89281	0.0628689
SiJWA10ACC_pcr_2	-3.46775	-3.249	-5.38629	-5.00883	-4.27797	1.07669	4	7.94655	0.00415637		SiJWB09ABM_pcr_2	2.42623	3.30815	1.77869	1.9125	2.35639	0.693182	4	6.79876	0.00650654
SiJWH10ACT_pcr_2	-2.4306	-2.54493	-6.36423	-5.73364	-4.26835	2.07262	4	4.11879	0.0259361		SiJWD10BAJ_pcr_2	0.758646	1.45977	3.42321	3.78524	2.35672	1.47608	4	3.19321	0.049589
SiJWD02BAY_pcr_1	-3.39238	-3.11858	-5.42309	-5.12018	-4.26356	1.1759	4	7.25156	0.00541023		SiJWB02ABG_pcr_2	1.1678	1.26939	3.38496	3.6083	2.35761	1.31903	4	3.57475	0.0374255
SiJWD12BAY_pcr_1	-2.4965	-2.75185	-6.02234	-5.77692	-4.2619	1.89661	4	4.49424	0.020561		SiJWH08BAM_pcr_1	1.80379	2.04368	2.50789	3.07883	2.35855	0.562143	4	8.39127	0.00354991
SiJWB02ABT_pcr_2	-4.531	-4.65624	-4.19235	-3.64145	-4.25526	0.453705	4	18.7578	0.000330748		SiJWD12BAV_pcr_1	1.60217	1.72025	3.14746	2.97355	2.36086	0.812428	4	5.81185	0.0101408
SiJWC09AAX_pcr_1	-3.6569	-3.82602	-4.82138	-4.70564	-4.25248	0.595982	4	14.2705	0.000745638		SiJWF09ACA_pcr_2	1.67932	3.52372	2.15004	2.13931	2.3731	0.797843	4	5.94878	0.00949905
SiJWE06ACO_pcr_2	-3.42582	-3.6957	-5.06717	-4.79076	-4.24486	0.805525	4	10.5394	0.00182443		SiJWB02BBL_pcr_1	1.88864	1.87407	2.86576	2.87443	2.37573	0.570892	4	8.32286	0.00363523
SiJWA03ACS_pcr_2	-2.50628	-2.40662	-6.52138	-5.52333	-4.2394	2.0991	4	4.03926	0.0273007		SiJWE02AAD_pcr_2	2.00216	1.85369	2.83107	2.82196	2.37722	0.522344	4	9.10212	0.00280212
SiJWE07ACQ_pcr_2	-3.21839	-3.2049	-5.11924	-5.36308	-4.2264	1.17598	4	7.1879	0.00554885		SiJWG10ABT_pcr_2	1.69527	1.96204	3.04546	2.81219	2.37874	0.65145	4	7.30291	0.00530173
SiJWF03BCN_pcr_1	-3.51054	-3.52449	-4.628	-5.19292	-4.21399	0.836652	4	10.0735	0.00208324		SiJWF08BBD_pcr_1	2.34333	1.44035	3.31233	2.42239	2.3796	0.764925	4	6.22179	0.00837033
SiJWA08ACF_pcr_2	-3.38149	-3.37849	-4.8915	-5.18493	-4.2091	0.964844	4	8.72494	0.00316969		SiJWG09AAD_pcr_2	2.07817	1.75889	2.92434	2.75822	2.3799	0.55264	4	8.61285	0.00329113
SiJWH07ADD_pcr_1	-4.1178	-4.29448	-4.37424	-4.03138	-4.20448	0.157476	4	53.3982	1.44658e-05		SiJWC08CAE_pcr_1	2.67358	1.94146	2.47424	2.44237	2.38291	0.311577	4	15.2958	0.000606893
SiJWG03AAA_pcr_1	-3.11724	-3.37245	-5.27351	-5.05045	-4.20341	1.11548	4	7.53654	0.00484275		SiJWF08CAC_pcr_1	2.00982	2.64193	2.43506	2.45949	2.38657	0.267594	4	17.8373	0.000384231
SiJWD06ADP_pcr_1	-3.95848	-4.2523	-4.03554	-4.5374	-4.19593	0.259416	4	32.3491	6.49221e-05		SiJWB05BDN_pcr_1	2.4239	2.24157	2.41172	2.48647	2.39092	0.10481	4	45.624	2.31814e-05
SiJWH03BCV_pcr_1	-4.06321	-3.97454	-4.23318	-4.48338	-4.18858	0.223926	4	37.4104	4.20125e-05		SiJWB02ABP_pcr_2	2.19147	2.00226	2.63056	2.74674	2.39276	0.353487	4	13.538	0.000871643
SiJWH04ADQ_pcr_1	-3.34448	-3.17956	-5.01872	-5.19543	-4.18455	1.0698	4	7.82304	0.0043488		SiJWH05ABD_pcr_2	1.93738	2.06449	2.62604	2.94434	2.39306	0.473918	4	10.0991	0.0020678
SiJWA06CAG_pcr_1	-4.38192	-4.65673	-4.30485	-3.39007	-4.18339	0.55002	4	15.2118	0.000616902		SiJWB07BAU_pcr_1	1.40147	2.19085	2.82468	3.15618	2.3933	0.773042	4	6.19189	0.00848504
SiJWC02AAZ_pcr_2	-4.25257	-4.3078	-4.25625	-3.85608	-4.16818	0.209585	4	39.7756	3.49651e-05		SiJWF09BDF_pcr_1	1.18099	1.61631	3.18663	3.5949	2.39471	1.17567	4	4.07376	0.0266976
SiJWC07BDC_pcr_1	-3.87484	-3.53067	-4.48569	-4.77829	-4.16737	0.567309	4	14.6917	0.000684002		SiJWH06BBC_pcr_1	1.86363	1.84055	2.85466	3.02099	2.39496	0.630584	4	7.59599	0.00473439
SiJWG11AAR_pcr_2	-3.66444	-3.83022	-4.55894	-4.58056	-4.15854	0.479702	4	17.338	0.000418116		SiJWA10AAP_pcr_2	2.11099	2.48607	2.43878	2.54601	2.39546	0.194657	4	24.6121	0.000147045
SiJWH08ACX_pcr_1	-3.2735	-3.11081	-5.07008	-5.15771	-4.15303	1.11208	4	7.46897	0.00496992		SiJWF01BDF_pcr_1	3.11826	2.74719	1.79424	1.92352	2.3958	0.640402	4	7.48218	0.00494471
SiJWB04BDW_pcr_2	-4.6402	-3.6594	-4.22689	-4.0675	-4.1485	0.405667	4	20.4527	0.000255559		SiJWH01BAU_pcr_1	2.56612	2.36441	2.29474	2.36636	2.39791	0.116983	4	40.9958	3.19392e-05
SiJWE01BDY_pcr_1	-5.09321	-4.66813	-3.30643	-3.51219	-4.14499	0.871093	4	9.51676	0.0024604		SiJWC09AAN_pcr_2	2.09314	2.17755	2.80895	2.51842	2.39952	0.329097	4	14.5824	0.000699323
SiJWH02ABP_pcr_2	-3.56111	-3.90605	-4.65324	-4.44317	-4.14089	0.49839	4	16.6171	0.000474432		SiJWE07BBL_pcr_1	0.64993	1.38588	3.87997	3.7131	2.40722	1.63356	4	2.94721	0.0601595
SiJWC08BDU_pcr_1	-3.98124	-3.98106	-4.29748	-4.28004	-4.13496	0.177741	4	46.5278	2.1858e-05		SiJWE01AAI_pcr_2	2.57092	2.4824	2.26902	2.313	2.40883	0.14191	4	33.9488	5.61878e-05
SiJWF10BDM_pcr_1	-3.79571	-3.66332	-4.83934	-4.24132	-4.13492	0.530722	4	15.5823	0.000574352		SiJWD10AAZ_pcr_2	0.985991	1.13635	3.65215	3.88456	2.41476	1.56707	4	3.08188	0.0540564
SiJWC04AAD_pcr_2	-2.71878	-3.02451	-5.31109	-5.40334	-4.11443	1.44096	4	5.7107	0.0106518		SiJWB04BAO_pcr_1	1.86668	2.33441	2.5873	2.88834	2.41918	0.432365	4	11.1905	0.0015296
SiJWE04BCR_pcr_1	-2.92973	-3.17432	-5.13994	-5.18976	-4.10844	1.22409	4	6.71264	0.00674741		SiJWB07ADX_pcr_1	3.26198	3.90089	1.30948	1.22351	2.42396	1.3622	4	3.5589	0.0378498
SiJWC09AAX_pcr_2	-3.29407	-3.18272	-5.12502	-4.81848	-4.10507	1.00957	4	8.13232	0.00388757		SiJWF11BCL_pcr_1	2.05139	2.25361	2.43602	2.9934	2.4336	0.404914	4	12.0203	0.00123881
SiJWE08ADU_pcr_1	-3.09794	-3.27255	-4.87128	-5.1699	-4.10292	1.06901	4	7.67612	0.00459334		SiJWD09BDY_pcr_1	1.75305	1.47095	3.19743	3.33126	2.43817	0.962462	4	5.06653	0.0148441
SiJWC07AAC_pcr_2	-4.42675	-4.48354	-3.55483	-3.94195	-4.10177	0.438193	4	18.7213	0.000332676		SiJWB11BEA_pcr_1	2.29325	2.50638	2.49325	2.45988	2.43819	0.0985921	4	49.4602	1.81998e-05
SiJWA01MAA_pcr_1	-3.73443	-3.83597	-4.21932	-4.60234	-4.09801	0.395776	4	20.7087	0.00024625		SiJWG07BBU_pcr_1	1.20547	2.50458	3.10144	2.94174	2.43831	0.859739	4	5.6722	0.0108552
SiJWB02BDC_pcr_1	-3.74203	-4.14258	-4.33451	-4.16266	-4.09544	0.250861	4	32.6511	6.31409e-05		SiJWD02AAA_pcr_2	2.59409	2.55337	2.29355	2.31545	2.43912	0.156583	4	31.1543	7.26619e-05
SiJWC07AAC_pcr_1	-4.32344	-4.41437	-3.82477	-3.81338	-4.09399	0.319644	4	25.616	0.000130485		SiJWC09BAC_pcr_1	2.19928	2.17795	2.74139	2.64353	2.44054	0.293757	4	16.616	0.00047452
SiJWH12AEA_pcr_1	-2.56652	-2.84008	-5.31369	-5.65484	-4.09378	1.61548	4	5.06818	0.0148308		SiJWH08ABQ_pcr_2	3.74216	3.61126	1.52374	0.885088	2.44056	1.45198	4	3.3617	0.0436782
SiJWF03BAD_pcr_1	-3.64769	-3.59018	-4.85592	-4.24204	-4.08396	0.593033	4	13.7731	0.000828312		SiJWE10BBH_pcr_1	1.83024	1.35447	3.5272	3.05657	2.44212	1.01855	4	4.79529	0.0172541
SiJWB11BBT_pcr_1	-3.97254	-3.13035	-4.48142	-4.73673	-4.08026	0.708478	4	11.5184	0.00140487		SiJWC10BBY_pcr_1	2.01164	2.3222	2.78349	2.66446	2.44545	0.349106	4	14.0098	0.000787535
SiJWB04BAA_pcr_2	-4.01427	-3.943	-4.02483	-4.3365	-4.07965	0.175047	4	46.612	2.174e-05		SiJWB01BDK_pcr_1	2.09194	1.90727	2.81424	3.0097	2.45579	0.538072	4	9.1281	0.00277892
SiJWC08BBY_pcr_1	-3.14644	-2.86319	-5.26055	-4.96459	-4.05869	1.22835	4	6.60838	0.00705497		SiJWC10BAW_pcr_1	2.68885	2.57943	2.43963	2.1157	2.4559	0.248682	4	19.7514	0.000283587
SiJWF06BCF_pcr_1	-3.94915	-3.80227	-4.23788	-4.23749	-4.0567	0.217419	4	37.3168	4.23288e-05		SiJWA09BAS_pcr_1	1.85287	2.02438	3.13303	2.82207	2.45809	0.617095	4	7.96663	0.00412615
SiJWG12BBC_pcr_1	-3.10741	-3.11154	-4.91605	-5.03865	-4.04341	1.07958	4	7.49072	0.0049285		SiJWA05ADY_pcr_1	3.06791	2.72999	2.12388	1.91134	2.45828	0.534304	4	9.20181	0.00271449
SiJWG01BBZ_pcr_1	-4.0753	-4.2694	-3.92579	-3.85464	-4.03128	0.183457	4	43.9481	2.59324e-05		SiJWE01BCW_pcr_1	1.24326	2.5676	3.32087	2.71249	2.46105	0.874998	4	5.62528	0.0111099
SiJWA02BAO_pcr_1	-3.21901	-3.37659	-4.93144	-4.59005	-4.02927	0.85847	4	9.3871	0.00256102		SiJWF08AAP_pcr_2	1.27537	1.13223	3.78942	3.65709	2.46353	1.45678	4	3.38215	0.0430231
SiJWH04MAA_pcr_1	-3.69584	-3.8008	-4.30546	-4.30942	-4.02788	0.325642	4	24.738	0.000144819		SiJWE01BDN_pcr_1	2.11764	2.48523	2.55497	2.70409	2.46548	0.249219	4	19.7856	0.000282125
SiJWF09BBR_pcr_1	-3.51595	-3.64354	-4.2855	-4.66295	-4.02698	0.541439	4	14.8751	0.000659277		SiJWF03CAO_pcr_1	1.5195	1.59944	3.24567	3.49904	2.46591	1.05227	4	4.68684	0.0183598
SiJWB05BDA_pcr_1	-4.31537	-4.07766	-3.85296	-3.84936	-4.02384	0.221758	4	36.2904	4.6016e-05		SiJWB01ADD_pcr_1	2.01247	2.36192	2.72399	2.76684	2.46631	0.352888	4	13.9779	0.000792873
SiJWH01BAP_pcr_1	-3.05012	-2.83651	-4.98563	-5.21481	-4.02177	1.25184	4	6.42537	0.00764093		SiJWG12AAQ_pcr_2	2.09136	1.77655	3.19971	2.79832	2.46649	0.649223	4	7.59827	0.00473029
SiJWB11AAS_pcr_2	-3.64247	-3.54115	-4.25167	-4.64378	-4.01977	0.521088	4	15.4283	0.000591538		SiJWG09ACY_pcr_1	2.77828	2.73198	2.30536	2.08023	2.47397	0.337952	4	14.6409	0.000691064
SiJWF11BAT_pcr_1	-3.47782	-3.32996	-4.64578	-4.62491	-4.01962	0.713589	4	11.2659	0.00149964		SiJWE05BCT_pcr_1	1.88626	1.85021	3.16118	3.02009	2.47944	0.708254	4	7.00155	0.00598247
SiJWC11CAJ_pcr_1	-2.8922	-3.07082	-5.05085	-5.06356	-4.01936	1.20063	4	6.69542	0.00679698		SiJWH07ACW_pcr_2	1.80566	2.07547	3.04026	3.02141	2.4857	0.639081	4	7.77898	0.00442029
SiJWA10CAQ_pcr_1	-4.28035	-5.1079	-3.25624	-3.42226	-4.01669	0.854767	4	9.39832	0.00255209		SiJWG09CAN_pcr_1	2.14947	2.35388	2.79043	2.66561	2.48985	0.291882	4	17.0607	0.000438669
SiJWC09BAX_pcr_1	-2.78042	-2.8111	-5.21002	-5.23349	-4.00876	1.40074	4	5.72378	0.0105839		SiJWA09BDL_pcr_1	1.12041	1.13168	3.51097	4.20218	2.49131	1.60153	4	3.11115	0.052834
SiJWD12ACD_pcr_2	-3.81764	-4.70911	-3.66567	-3.84106	-4.00837	0.473583	4	16.9279	0.000448988		SiJWH03ACS_pcr_2	1.42544	1.15277	3.45435	3.94089	2.49336	1.40908	4	3.539	0.0383912
SiJWE01ABC_pcr_2	-3.29539	-3.18684	-4.79997	-4.72682	-4.00226	0.880513	4	9.09074	0.00281236		SiJWD01ABO_pcr_2	1.36659	1.36914	3.61473	3.62391	2.49359	1.29988	4	3.83664	0.0312201
SiHNB01w01me_pcr_1	-3.4486	-3.60827	-4.08113	-4.86677	-4.00119	0.636492	4	12.5726	0.00108489		SiJWB10ACI_pcr_2	1.36567	1.02584	3.64701	3.93605	2.49364	1.5097	4	3.3035	0.0456135
SiJWD06CAO_pcr_1	-2.70777	-2.75275	-5.1435	-5.38781	-3.99795	1.46732	4	5.44933	0.012138		SiJWA03ACH_pcr_2	2.92249	3.12019	1.9299	2.03376	2.50158	0.607044	4	8.24186	0.00373977
SiJWE08CAM_pcr_1	-2.83663	-2.79327	-5.12636	-5.1955	-3.98794	1.35487	4	5.88684	0.00978256		SiJWE10BBV_pcr_1	2.45947	2.72844	2.40299	2.43554	2.50661	0.149686	4	33.4917	5.85152e-05
SiJWH11ABG_pcr_2	-2.38727	-3.05617	-5.20748	-5.25469	-3.9764	1.47442	4	5.39385	0.0124878		SiJWB11ABJ_pcr_2	2.60337	2.6579	2.31733	2.47156	2.51254	0.151836	4	33.0953	6.0638e-05
SiJWH06BDK_pcr_1	NA	-5.1309	-3.39778	-3.39651	-3.97506	1.00098	3	6.87826	0.0204896		SiJWC09CAR_pcr_1	2.67895	2.41877	2.4226	2.53387	2.51355	0.122508	4	41.0349	3.1848e-05
SiJWH11AAB_pcr_1	-3.48848	-3.55406	-4.36933	-4.44762	-3.96487	0.513924	4	15.4298	0.000591373		SiJWB11BCH_pcr_1	1.68902	1.78229	3.06056	3.53186	2.51593	0.922087	4	5.45704	0.0120904
SiJWD07ABB_pcr_2	-3.61412	-3.86589	-4.49163	-3.87224	-3.96097	0.373636	4	21.2023	0.000229539		SiJWB10ACR_pcr_2	2.24899	2.03035	2.85759	2.93118	2.51703	0.445797	4	11.2923	0.00148936
SiJWD01BAS_pcr_1	-3.67198	-3.36684	-4.28426	-4.42821	-3.93782	0.502394	4	15.6763	0.000564181		SiJWC01BDW_pcr_2	1.94579	2.38199	2.95618	2.78501	2.51724	0.450632	4	11.172	0.00153705
SiJWH12ADR_pcr_1	-2.54343	-2.40486	-5.51321	-5.28494	-3.93661	1.69223	4	4.65258	0.0187282		SiJWF07ADF_pcr_1	2.54176	2.51498	2.44483	2.58413	2.52142	0.0584635	4	86.2563	3.43469e-06
SiJWE02ADS_pcr_1	-3.85174	-3.27973	-4.25052	-4.35674	-3.93468	0.48776	4	16.1337	0.000517961		SiJWH08BDL_pcr_1	2.87443	2.43647	2.52166	2.25882	2.52285	0.258707	4	19.5035	0.000294467
SiJWE10ACO_pcr_2	-4.11328	-4.45249	-3.80367	-3.36412	-3.93339	0.462864	4	16.9959	0.000443663		SiJWC07BCF_pcr_1	2.01415	2.1583	2.83	3.09099	2.52336	0.519229	4	9.71965	0.00231319
SiJWG10BDP_pcr_1	-3.39571	-4.06338	-4.17678	-4.08129	-3.92929	0.359187	4	21.8788	0.000208999		SiJWG02BDZ_pcr_1	2.51045	1.75072	2.6797	3.15574	2.52415	0.583518	4	8.65151	0.00324857
SiJWB04ADR_pcr_1	-3.1602	-3.54243	-4.30999	-4.6915	-3.92603	0.699291	4	11.2286	0.00151437		SiJWF11AAN_pcr_2	2.44167	2.34385	2.62354	2.69736	2.52661	0.162445	4	31.1073	7.29915e-05
SiJWG07BDV_pcr_1	-4.16745	-3.89381	-3.77119	-3.8447	-3.91928	0.172944	4	45.3243	2.36437e-05		SiJWD06BAA_pcr_2	2.5336	2.41404	2.73585	2.43107	2.52864	0.147891	4	34.1961	5.498e-05
SiJWB12BCQ_pcr_1	-2.90337	-2.44759	-5.29327	-4.99406	-3.90957	1.44229	4	5.42135	0.0123128		SiJWG01ACP_pcr_2	2.50756	2.57678	2.69117	2.34405	2.52989	0.145195	4	34.8482	5.19571e-05
SiJWF06ADN_pcr_1	-3.10072	-3.35846	-4.79416	-4.36626	-3.9049	0.806005	4	9.68951	0.00233431		SiJWE08BCO_pcr_1	3.67711	3.43702	1.76519	1.25281	2.53303	1.2048	4	4.20489	0.0245562
SiJWC03BAS_pcr_1	-3.60478	-3.7215	-4.07591	-4.18643	-3.89716	0.278073	4	28.0298	9.96839e-05		SiJWA07ACD_pcr_2	1.55102	1.59582	3.4947	3.50405	2.5364	1.1121	4	4.56144	0.019756
SiJWD03ACN_pcr_2	-2.88745	-2.80074	-4.67785	-5.2042	-3.89256	1.23009	4	6.32889	0.00797572		SiJWD07ABR_pcr_2	1.99933	2.17004	2.9863	2.9968	2.53812	0.528214	4	9.61018	0.00239112
SiJWH07AAD_pcr_2	-4.75557	-4.62843	-3.03662	-3.1215	-3.88553	0.933321	4	8.32624	0.00363094		SiJWF07ACJ_pcr_2	1.30442	1.80853	3.23286	3.80928	2.53877	1.17656	4	4.3156	0.0229181
SiJWH10BEA_pcr_2	-2.98426	-3.12187	-4.66387	-4.75767	-3.88192	0.959486	4	8.09166	0.00394439		SiJWC04CAR_pcr_1	1.53775	1.82648	3.26845	3.52689	2.53989	1.00303	4	5.06444	0.0148609
SiJWD01BAF_pcr_1	-4.02774	-3.89169	-3.71172	-3.89215	-3.88082	0.129651	4	59.8658	1.02683e-05		SiJWC08AAC_pcr_1	0.874243	1.47926	4.00278	3.80674	2.54076	1.59627	4	3.18336	0.049965
SiJWG10AAQ_pcr_2	-2.83595	-2.83109	-5.11695	-4.73824	-3.88055	1.21886	4	6.36751	0.00783943		SiJWE06BDB_pcr_1	1.92622	2.00938	2.88178	3.34625	2.54091	0.689232	4	7.37315	0.00515792
SiJWB06BDG_pcr_1	-4.01449	-2.96088	-3.88412	-4.65947	-3.87974	0.700111	4	11.0832	0.00157359		SiJWH06BCV_pcr_1	1.36804	1.33601	3.52036	3.96787	2.54807	1.39317	4	3.65795	0.0352956
SiJWE04BDS_pcr_1	-2.40162	-2.33575	-5.47439	-5.28485	-3.87415	1.7403	4	4.45229	0.0210852		SiJWA02AA1_pcr_1	2.44226	2.8656	2.47611	2.42378	2.55194	0.210229	4	24.2778	0.000153179
SiJWC08BAQ_pcr_1	-2.88735	-3.02186	-4.61477	-4.93656	-3.86513	1.06099	4	7.28591	0.00533733		SiJWF01CAR_pcr_1	2.24563	2.45604	2.67833	2.83622	2.55406	0.258068	4	19.7937	0.000281783
SiJWH08ADC_pcr_1	-3.85151	-4.34018	-3.67689	-3.58355	-3.86303	0.336928	4	22.9309	0.000181652		SiJWE11ACK_pcr_2	2.83311	2.63834	2.42173	2.32998	2.55579	0.225599	4	22.6578	0.000188269
SiJWA10ADN_pcr_1	-3.28985	-3.67395	-3.90389	-4.58019	-3.86197	0.541682	4	14.2592	0.000747398		SiJWH02BAD_pcr_1	2.70493	2.177	2.60877	2.73892	2.5574	0.259524	4	19.7084	0.000285435
SiJWH10BAO_pcr_1	-4.842	-5.081	-6.67473	1.19856	-3.84979	3.46249	4	2.22371	0.112653		SiJWD10BDC_pcr_1	2.50326	2.63422	2.66075	2.45609	2.56358	0.0993764	4	51.5933	1.60362e-05
SiJWG08BDY_pcr_1	-3.99697	-4.22515	-3.90995	-3.26231	-3.8486	0.412837	4	18.6446	0.000336767		SiJWA08BCC_pcr_1	1.57831	1.07847	3.75201	3.86595	2.56868	1.44738	4	3.54942	0.0381064
SiJWD05ADC_pcr_1	-3.34834	-3.28851	-4.21653	-4.53809	-3.84787	0.625761	4	12.2982	0.00115798		SiJWF06AAH_pcr_2	1.80559	1.82245	3.25236	3.40253	2.57073	0.87595	4	5.86959	0.0098635
SiJWB05AAG_pcr_2	-3.3685	-3.41675	-4.30557	-4.27893	-3.84244	0.519884	4	14.7819	0.000671693		SiJWG11ADF_pcr_1	2.30502	2.34043	2.83836	2.8001	2.57098	0.287448	4	17.8883	0.000380976
SiJWC08BCP_pcr_1	-2.9371	-3.18835	-4.50653	-4.70988	-3.83546	0.901984	4	8.5045	0.00341443		SiJWD04BAC_pcr_1	2.49453	2.50458	2.79083	2.50446	2.5736	0.144894	4	35.524	4.90533e-05
SiJWD03AAX_pcr_2	-2.76624	-2.78957	-4.88782	-4.8953	-3.83473	1.22036	4	6.28459	0.00813591		SiJWD01CAT_pcr_1	1.80832	2.89614	2.57307	3.01958	2.57428	0.544238	4	9.46012	0.00250369
SiJWF02BCM_pcr_1	-3.26783	-3.39329	-4.21877	-4.42563	-3.82638	0.580982	4	13.1721	0.000945289		SiJWH03BAD_pcr_1	1.49099	1.66965	3.22823	3.91572	2.57615	1.18589	4	4.34468	0.0225115
SiJWF04BDH_pcr_1	-1.82366	-2.30927	-5.78252	-5.37015	-3.8214	2.04305	4	3.74088	0.0333243		SiJWF11BBL_pcr_1	1.93566	1.46677	3.34079	3.56214	2.57634	1.03244	4	4.99078	0.0154705
SiJWB03AAF_pcr_2	-2.67591	-2.82208	-4.99141	-4.78421	-3.8184	1.23918	4	6.16281	0.00859862		SiJWH01BDF_pcr_1	2.7492	2.27197	2.69226	2.59284	2.57657	0.213099	4	24.1819	0.000155
SiJWC10BCX_pcr_1	-2.77107	-2.42719	-5.29199	-4.73425	-3.80613	1.41915	4	5.36393	0.0126819		SiJWH09BCP_pcr_1	1.65131	1.74493	3.47642	3.43734	2.5775	1.01626	4	5.0725	0.0147962
SiJWA07BAL_pcr_1	-2.88947	-3.20012	-4.611	-4.52291	-3.80588	0.888651	4	8.56551	0.00334427		SiJWC09BAM_pcr_1	1.69322	2.11167	3.03137	3.47898	2.57881	0.820081	4	6.28916	0.0081192
SiJWD12BAE_pcr_1	-3.20178	-3.44099	-4.25628	-4.32219	-3.80531	0.567893	4	13.4015	0.000898197		SiJWH10BBY_pcr_1	2.10775	2.43961	2.75226	3.01615	2.57894	0.392694	4	13.1346	0.000953299
SiJWE03AAE_pcr_2	-2.74691	-2.77547	-5.02871	-4.6151	-3.79155	1.20174	4	6.31012	0.00804308		SiJWG10ADP_pcr_1	1.55839	1.80098	3.45462	3.51058	2.58114	1.04586	4	4.9359	0.015946
SiJWB05BCM_pcr_1	-3.40729	-3.22463	-4.29383	-4.22586	-3.7879	0.550728	4	13.756	0.000831371		SiJWH10AAI_pcr_2	2.88526	2.69972	2.45266	2.29408	2.58293	0.261693	4	19.7401	0.000284068
SiJWB03BAA_pcr_2	-3.11618	-3.16795	-4.61442	-4.25195	-3.78763	0.76027	4	9.9639	0.00215107		SiJWF10AAK_pcr_2	2.90441	2.60266	2.50042	2.33535	2.58571	0.23931	4	21.6097	0.000216863
SiJWA06ACQ_pcr_2	-2.84386	-3.14066	-4.49395	-4.65193	-3.7826	0.92287	4	8.19747	0.00379876		SiJWB06ABL_pcr_2	3.20483	3.0059	2.27945	1.85958	2.58744	0.627407	4	8.24804	0.00373165
SiJWH08BAF_pcr_1	-3.7921	-4.0463	-3.65153	-3.6045	-3.77361	0.198497	4	38.0218	4.00214e-05		SiJWA10BBL_pcr_1	2.10798	2.5523	2.77159	2.92552	2.58935	0.35558	4	14.5641	0.000701939
SiJWC04ABR_pcr_2	-3.54823	-3.41447	-4.21883	-3.89839	-3.76998	0.36218	4	20.8183	0.000242404		SiJWD04ABX_pcr_2	1.60821	1.63857	3.40809	3.70263	2.58938	1.12195	4	4.61583	0.0191341
SiJWB07ADK_pcr_1	-2.61281	-3.04628	-5.25167	-4.16718	-3.76948	1.18546	4	6.35951	0.00786743		SiJWC01BBY_pcr_1	1.68061	2.02223	3.21629	3.43978	2.58973	0.868665	4	5.96255	0.00943751
SiJWD11BBY_pcr_1	-3.26175	-3.95646	-4.02874	-3.78895	-3.75897	0.346366	4	21.7052	0.000214028		SiJWA04BBD_pcr_1	2.06647	1.83988	3.29375	3.16067	2.59019	0.743348	4	6.96899	0.00606278
SiJWA11CAF_pcr_1	-3.81621	-4.12022	-3.44215	-3.6373	-3.75397	0.288013	4	26.0681	0.000123836		SiJWC01ACF_pcr_2	1.91162	1.65073	3.33871	3.47233	2.59334	0.94542	4	5.48612	0.011913
SiJWC06AAL_pcr_2	-2.29948	-2.35432	-5.5243	-4.82612	-3.75105	1.66914	4	4.49459	0.0205567		SiJWA12BCP_pcr_1	2.3468	2.64475	2.72147	2.67758	2.59765	0.170158	4	30.5321	7.71835e-05
SiJWG08AAP_pcr_2	-4.57007	-4.52427	-3.12885	-2.77395	-3.74929	0.932826	4	8.03855	0.00402028		SiJWH11BDQ_pcr_1	2.57706	2.52647	2.49118	2.83669	2.60785	0.156581	4	33.3098	5.94767e-05
SiJWE10BBA_pcr_1	-2.92158	-3.21485	-4.49131	-4.32391	-3.73791	0.785492	4	9.51737	0.00245993		SiJWH09AEA_pcr_1	2.55828	2.62408	2.60334	2.64833	2.60851	0.0382023	4	136.563	8.65743e-07
SiJWC08ACJ_pcr_2	-3.50364	-3.65857	-4.01039	-3.76589	-3.73462	0.213045	4	35.0595	5.10249e-05		SiJWE05AAG_pcr_2	1.95323	1.80647	3.3926	3.29527	2.61189	0.848341	4	6.15765	0.00861898
SiJWF02ADY_pcr_1	-3.63418	-3.65518	-3.79056	-3.85731	-3.73431	0.107364	4	69.5635	6.54641e-06		SiJWD04AAA_pcr_2	2.5807	2.21914	2.79098	2.86947	2.61507	0.290748	4	17.9886	0.000374686
SiJWG07ADA_pcr_1	-3.21257	-3.29734	-4.23817	-4.18703	-3.73378	0.554371	4	13.4703	0.000884678		SiJWB07AAS_pcr_2	3.41602	2.91063	2.44637	1.69818	2.6178	0.729835	4	7.17368	0.00558044
SiJWH08AAX_pcr_1	-4.69368	-3.97676	-3.02971	-3.22694	-3.73177	0.760051	4	9.81979	0.00224483		SiJWC02ADR_pcr_1	1.90277	2.06407	3.04679	3.47126	2.62122	0.759441	4	6.90303	0.00622984
SiJWG12BCV_pcr_1	-3.26469	-3.46331	-4.05293	-4.14165	-3.73064	0.432578	4	17.2484	0.000424614		SiJWF06BBC_pcr_1	1.25152	1.51452	3.4522	4.26696	2.6213	1.47194	4	3.56168	0.0377748
SiJWF06ADA_pcr_1	-4.18366	-3.79666	-3.3904	-3.54225	-3.72824	0.346801	4	21.5007	0.00022016		SiJWH12CAD_pcr_1	2.72245	2.29582	2.72036	2.75546	2.62352	0.219059	4	23.9527	0.000159474
SiJWH11ACR_pcr_2	-3.21149	-3.74142	-3.91041	-3.99906	-3.7156	0.352652	4	21.0723	0.000233789		SiJWH03ADY_pcr_newprimers	2.26747	2.29753	2.99322	2.93811	2.62408	0.395257	4	13.2778	0.000923192
SiJWG08BAF_pcr_1	-2.8566	-3.17	-4.39423	-4.39584	-3.70417	0.807941	4	9.1694	0.00274258		SiJWB04ADD_pcr_1	3.35712	3.66745	1.89963	1.57367	2.62447	1.0415	4	5.03981	0.0150612
SiJWB06ABN_pcr_2	-3.36123	-3.59	-3.9812	-3.84896	-3.69535	0.275707	4	26.8063	0.000113917		SiJWG08ADO_pcr_1	2.76503	3.02618	2.3096	2.40083	2.62541	0.331804	4	15.8251	0.00054856
SiJWA08CAJ_pcr_1	-2.78368	-2.78156	-4.33573	-4.86819	-3.69229	1.07266	4	6.8844	0.00627814		SiJWC01BDA_pcr_1	1.44159	2.76583	2.85004	3.45641	2.62846	0.848946	4	6.1923	0.00848343
SiJWG09ACO_pcr_2	-2.92628	-3.20778	-4.24523	-4.36255	-3.68546	0.724873	4	10.1686	0.00202663		SiJWD01CAM_pcr_1	1.88925	2.14264	3.20416	3.28374	2.62995	0.71723	4	7.33363	0.0052382
SiJWH01BBY_pcr_1	-3.24938	-3.17911	-4.16945	-4.13116	-3.68228	0.541421	4	13.6023	0.000859509		SiJWF12ABU_pcr_2	0.651222	1.05565	4.36867	4.45313	2.63217	2.06082	4	2.55449	0.0836149
SiJWH06ACX_pcr_1	-2.76477	-3.18451	-4.13892	-4.63471	-3.68073	0.857367	4	8.58612	0.003321		SiJWC02CAM_pcr_1	1.89919	2.01283	2.55868	4.07033	2.63526	0.999085	4	5.27535	0.0132803
SiJWD10BCO_pcr_1	-3.33967	-3.29337	-4.03668	-4.05247	-3.68055	0.42082	4	17.4923	0.000407236		SiJWG11BBE_pcr_1	2.16763	1.85212	3.44243	3.08192	2.63603	0.749004	4	7.03875	0.00589242
SiJWF06AAA_pcr_2	-2.61539	-2.78424	-4.65116	-4.66677	-3.67939	1.13323	4	6.49362	0.00741518		SiJWD07AAT_pcr_2	2.55962	2.34248	2.46852	3.17413	2.63619	0.369515	4	14.2684	0.000745968
SiJWC08BDB_pcr_1	-3.23758	-3.32514	-4.16912	-3.96404	-3.67397	0.462397	4	15.891	0.000541828		SiJWF07ADH_pcr_1	2.6635	2.80229	2.46902	2.61359	2.6371	0.137582	4	38.3351	3.90499e-05
SiJWH03AAY_pcr_2	-2.89899	-2.8765	-4.24008	-4.67326	-3.6722	0.922966	4	7.9574	0.00414001		SiJWG06ADT_pcr_1	2.89932	2.54002	2.73634	2.37464	2.63758	0.228706	4	23.0653	0.00017851
SiJWC06CAJ_pcr_1	-2.83827	-2.86275	-4.50517	-4.47748	-3.67092	0.947444	4	7.74909	0.00446967		SiJWE04BCO_pcr_1	0.989467	0.861679	4.36029	4.34139	2.63821	1.97828	4	2.66717	0.0758732
SiJWH08CAJ_pcr_1	-3.70472	-4.08729	-3.33113	-3.53211	-3.66381	0.320953	4	22.8308	0.000184041		SiJWH02BBG_pcr_1	1.5062	1.62774	3.43777	3.98148	2.6383	1.2578	4	4.19511	0.0247082
SiJWH04BDL_pcr_1	-2.98239	-3.34442	-4.0773	-4.25032	-3.66361	0.600363	4	12.2046	0.0011844		SiJWG01ABV_pcr_2	2.10299	2.36139	2.90579	3.18903	2.6398	0.496009	4	10.6442	0.00177218
SiJWA07BAM_pcr_1	-3.11761	-3.23974	-4.05694	-4.21709	-3.65784	0.559374	4	13.0783	0.000965486		SiJWF10ABW_pcr_2	2.50554	2.13999	3.07808	2.84603	2.64241	0.409238	4	12.9138	0.00100233
SiJWF01CAE_pcr_1	-3.64995	-3.33602	-3.69358	-3.91622	-3.64894	0.238994	4	30.5359	7.7155e-05		SiJWC02BCG_pcr_1	2.18516	3.10305	2.52941	2.75246	2.64252	0.385636	4	13.7047	0.000840612
SiJWG08AAO_pcr_2	-2.56969	-2.37917	-5.01052	-4.63063	-3.6475	1.36561	4	5.34192	0.0128272		SiJWB05AAC_pcr_2	2.25497	2.58313	2.90876	2.83173	2.64465	0.294612	4	17.9534	0.000376879
SiJWD06ADZ_pcr_1	-3.79674	-3.81587	-3.41528	-3.54668	-3.64364	0.195492	4	37.2767	4.24654e-05		SiJWA02BAY_pcr_1	2.07984	2.08545	3.39013	3.02753	2.64574	0.666845	4	7.9351	0.00417373
SiJWG05ACC_pcr_2	-3.12937	-3.31436	-4.12498	-4.00249	-3.6428	0.494421	4	14.7356	0.000677973		SiJWG01BCI_pcr_1	2.43803	2.13146	3.28234	2.74619	2.64951	0.49089	4	10.7947	0.00170052
SiJWF11AAL_pcr_2	-2.00896	-2.39354	-4.98444	-5.18288	-3.64245	1.67351	4	4.35306	0.022396		SiJWF12BDC_pcr_1	1.94143	2.15788	3.07927	3.44198	2.65514	0.720106	4	7.3743	0.00515562
SiJWC08BDS_pcr_1	-3.65914	-3.35724	-3.78189	-3.75167	-3.63748	0.193987	4	37.5023	4.17049e-05		SiJWF02ADC_pcr_1	3.02106	2.90437	2.28826	2.40794	2.65541	0.361351	4	14.6971	0.00068326
SiJWC04BDE_pcr_1	-3.17597	-3.20202	-3.84614	-4.31388	-3.6345	0.548829	4	13.2446	0.000930073		SiJWA07AAO_pcr_2	2.09803	2.12602	3.33138	3.08495	2.6601	0.640904	4	8.30108	0.00366295
SiJWH08ACJ_pcr_2	-2.93725	-2.93606	-4.30293	-4.35706	-3.63332	0.804747	4	9.02972	0.00286812		SiJWC12ACW_pcr_2	1.74816	2.27696	3.39455	3.22469	2.66109	0.782436	4	6.80207	0.00649753
SiJWB09CAB_pcr_1	-4.30709	-4.85269	-2.92296	-2.44456	-3.63183	1.1341	4	6.40475	0.0077109		SiJWH03ADY_pcr_1	2.15741	2.039	3.1964	3.28073	2.66839	0.66106	4	8.07306	0.00397076
SiJWA01ABD_pcr_2	-3.34203	-3.51435	-3.65453	-4.00037	-3.62782	0.27932	4	25.976	0.000125152		SiJWG06BAR_pcr_1	2.3191	2.18011	3.20331	2.98185	2.67109	0.498257	4	10.7218	0.00173475
SiJWG11ACQ_pcr_2	-2.26915	-1.91997	-5.17328	-5.13216	-3.62364	1.77145	4	4.09114	0.0264003		SiJWE07CAQ_pcr_1	2.43505	2.58904	2.56264	3.09813	2.67121	0.292443	4	18.2683	0.000357861
SiJWH11ACV_pcr_2	-3.28593	-3.39047	-3.88177	-3.91829	-3.61912	0.327506	4	22.1011	0.000202786		SiJWG02BBM_pcr_1	2.09795	2.08244	3.22859	3.2897	2.67467	0.675387	4	7.92042	0.00419613
SiJWF02ABH_pcr_2	-3.37377	-3.6576	-3.59989	-3.84369	-3.61874	0.19363	4	37.3779	4.2122e-05		SiJWF10BBK_pcr_1	2.3941	2.2827	3.0698	2.96066	2.67682	0.395921	4	13.522	0.000874713
SiJWE07BBX_pcr_1	-1.84402	-1.71405	-5.62119	-5.27232	-3.6129	2.12301	4	3.40357	0.0423502		SiJWD04BBA_pcr_1	2.06222	1.89628	3.24646	3.53139	2.68409	0.824933	4	6.5074	0.00737066
SiJWD09BDH_pcr_1	-3.16996	-3.41529	-3.99719	-3.86706	-3.61238	0.38623	4	18.7058	0.000333495		SiJWD06ACC_pcr_2	2.64855	2.80462	2.7287	2.55483	2.68418	0.107221	4	50.0681	1.75454e-05
SiJWC08BAM_pcr_1	-3.22453	-3.36983	-4.0028	-3.85063	-3.61195	0.373474	4	19.3424	0.000301839		SiJWG09BDP_pcr_1	1.2986	1.08502	4.25941	4.09401	2.68426	1.72686	4	3.10883	0.0529297
SiJWG07BCC_pcr_1	-3.16782	-3.02919	-4.16973	-4.04978	-3.60413	0.588621	4	12.246	0.00117262		SiJWE11ADV_pcr_1	2.74524	2.56788	2.55772	2.8713	2.68554	0.150836	4	35.6087	4.87049e-05
SiJWA08BAU_pcr_1	-2.54897	-2.53216	-4.39768	-4.91764	-3.59911	1.24062	4	5.80212	0.0101886		SiJWB05AAC_pcr_1	2.25918	2.59684	2.93741	2.9524	2.68646	0.328786	4	16.3417	0.000498601
SiJWD12BAD_pcr_1	-3.01812	-3.71238	-3.90352	-3.74127	-3.59382	0.392912	4	18.2932	0.000356407		SiJWA07ACO_pcr_2	2.89129	2.7887	2.49313	2.58215	2.68882	0.183159	4	29.3605	8.67701e-05
SiJWB12ABQ_pcr_2	-2.6622	-2.98812	-4.26934	-4.43801	-3.58942	0.895114	4	8.02003	0.0040472		SiJWH02AAR_pcr_2	2.25979	2.4117	2.9073	3.18297	2.69044	0.429248	4	12.5356	0.00109439
SiJWH11AAB_pcr_2	-3.19573	-3.10962	-4.03259	-3.99082	-3.58219	0.4975	4	14.4007	0.000725818		SiJWH05BDL_pcr_1	1.34658	3.76906	2.46482	3.19106	2.69288	1.04417	4	5.15794	0.0141315
SiJWA08BCB_pcr_1	-3.03952	-3.17899	-4.11732	-3.98472	-3.58014	0.549373	4	13.0335	0.00097534		SiJWC03BCW_pcr_1	2.75106	2.83875	2.4982	2.68418	2.69305	0.144499	4	37.2742	4.24739e-05
SiJWH08AAX_pcr_2	-3.92683	-4.24725	-3.03261	-3.10516	-3.57796	0.60294	4	11.8684	0.00128619		SiJWF04BBE_pcr_1	0.980834	0.934559	4.36619	4.50249	2.69602	2.0081	4	2.68514	0.0747217
SiJWE10AAY_pcr_2	-2.94045	-2.90276	-4.27177	-4.1931	-3.57702	0.757645	4	9.44247	0.00251739		SiJWA09ADT_pcr_1	1.27259	1.2133	4.31509	4.00233	2.70083	1.68843	4	3.19922	0.0493611
SiJWE02MAA_pcr_1	-2.97213	-3.17534	-4.19769	-3.95827	-3.57585	0.593805	4	12.0439	0.00123168		SiJWF11ACG_pcr_2	2.0577	2.04583	3.42899	3.28406	2.70415	0.755639	4	7.15724	0.00561726
SiJWC05BDW_pcr_2	-1.74648	-1.77868	-5.31944	-5.45567	-3.57507	2.09366	4	3.41513	0.0419923		SiJWA09CAK_pcr_1	2.45004	2.43391	3.21665	2.73733	2.70948	0.365716	4	14.8174	0.000666929
SiJWE05ABS_pcr_2	-2.24191	-1.93177	-4.87827	-5.24401	-3.57399	1.72834	4	4.13576	0.0256563		SiJWG01AAG_pcr_2	1.9147	2.09115	3.411	3.42717	2.71101	0.820815	4	6.60564	0.00706329
SiJWE04ABR_pcr_2	-4.56759	-4.33845	-3.04694	-2.31122	-3.56605	1.07141	4	6.65673	0.00691009		SiJWA06AAT_pcr_2	2.25261	2.06987	3.20411	3.3211	2.71192	0.642013	4	8.44818	0.00348095
SiJWB04AAQ_pcr_2	-3.1178	-3.36072	-3.81019	-3.97387	-3.56564	0.395395	4	18.0359	0.00037177		SiJWB12BBH_pcr_1	4.48346	2.1915	1.93638	2.23836	2.71243	1.18812	4	4.5659	0.019704
SiJWD07AAF_pcr_2	-2.9043	-3.12848	-4.15541	-4.07343	-3.5654	0.641394	4	11.1177	0.00155928		SiJWC09BCV_pcr_1	2.36216	2.49197	2.96314	3.04045	2.71443	0.337506	4	16.0852	0.000522614
SiJWB03BBX_pcr_1	-2.66121	-2.77264	-4.54255	-4.24837	-3.55619	0.977575	4	7.27554	0.0053592		SiJWC06BAD_pcr_1	2.54813	2.84689	2.54424	2.92443	2.71592	0.198542	4	27.3586	0.000107177
SiJWD05ADO_pcr_1	-3.58539	-3.6895	-3.79305	-3.14067	-3.55215	0.287124	4	24.7429	0.000144733		SiJWB03ADH_pcr_1	2.69269	2.61268	2.78055	2.78068	2.71665	0.0807579	4	67.2789	7.23585e-06
SiJWH10BEA_pcr_1	-2.89355	-2.76439	-4.26326	-4.26295	-3.54604	0.829675	4	8.54802	0.00336419		SiJWF07BBD_pcr_1	2.64386	2.39248	2.76484	3.07984	2.72025	0.28552	4	19.0548	0.000315624
SiJWB01CAS_pcr_1	-2.35334	-2.24131	-4.55518	-5.03374	-3.54589	1.45561	4	4.87202	0.0165237		SiJWG11BDU_pcr_1	2.56595	2.45522	2.88406	2.9815	2.72168	0.251081	4	21.6797	0.00021478
SiJWC07BDQ_pcr_1	-1.6748	-4.11263	-4.41435	-3.9627	-3.54112	1.25831	4	5.62838	0.0110929		SiJWA03CAH_pcr_1	2.22432	3.56407	2.44269	2.65875	2.72246	0.588438	4	9.25317	0.00267075
SiJWC09ABQ_pcr_2	-2.59933	-2.64149	-4.39554	-4.52165	-3.5395	1.06266	4	6.66155	0.00689585		SiJWG02CAC_pcr_1	2.1692	1.86402	3.77991	3.08564	2.72469	0.874281	4	6.23299	0.00832787
SiJWF12AAW_pcr_2	-3.1536	-3.19725	-3.79325	-4.01166	-3.53894	0.429489	4	16.4798	0.000486285		SiJWG12BDV_pcr_1	2.46175	2.41185	3.0516	2.99945	2.73116	0.341175	4	16.0103	0.000529915
SiHNA07w01me_pcr_1	-3.24281	-3.30572	-3.21752	-4.38271	-3.53719	0.564898	4	12.5233	0.00109758		SiJWE12ADH_pcr_1	2.66889	2.27599	2.96644	3.02662	2.73448	0.34335	4	15.9283	0.000538067
SiJWF07CAE_pcr_1	-2.59564	-2.81964	-4.14953	-4.58386	-3.53717	0.978413	4	7.23042	0.00545575		SiJWG04BBD_pcr_1	1.65195	1.65507	3.69842	3.93483	2.73507	1.2526	4	4.36702	0.0222054
SiJWD05BCB_pcr_1	-2.69885	-2.78345	-4.29182	-4.37219	-3.53658	0.919717	4	7.69059	0.00456847		SiJWF08CAI_pcr_1	2.14847	2.66633	2.90627	3.24327	2.74109	0.46053	4	11.904	0.00127486
SiJWG09BDV_pcr_1	-2.14849	-2.2162	-5.01222	-4.76251	-3.53485	1.56531	4	4.51648	0.02029		SiJWD11BBR_pcr_1	2.9959	2.16602	2.96633	2.84313	2.74284	0.390202	4	14.0586	0.000779455
SiJWB07BAV_pcr_1	-3.39616	-3.4475	-3.49275	-3.77268	-3.52727	0.168293	4	41.9182	2.98796e-05		SiJWH12ABV_pcr_2	1.29268	1.3199	4.2485	4.11737	2.74461	1.66173	4	3.30332	0.0456199
SiJWC04ADB_pcr_1	-2.49424	-2.1928	-4.76645	-4.65264	-3.52653	1.37234	4	5.13943	0.0142721		SiJWB04BCE_pcr_1	2.36576	2.28573	2.95109	3.3771	2.74492	0.515354	4	10.6526	0.00176807
SiJWH11BBK_pcr_1	-2.75635	-2.77799	-4.2022	-4.3486	-3.52128	0.872872	4	8.06827	0.00397758		SiJWF03BBK_pcr_1	1.253	1.27927	4.23702	4.21079	2.74502	1.70774	4	3.2148	0.0487771
SiJWF05MAA_pcr_1	-2.47002	-2.10699	-4.97919	-4.50666	-3.51571	1.43779	4	4.89045	0.0163542		SiJWH02BBA_pcr_1	2.63047	2.76017	2.78612	2.80724	2.746	0.079388	4	69.1793	6.65604e-06
SiJWE05BCM_pcr_1	-2.71375	-3.32086	-3.99594	-4.03162	-3.51554	0.626605	4	11.2209	0.00151742		SiJWG06AAE_pcr_2	2.59056	2.66081	2.77055	2.96417	2.74652	0.162909	4	33.7185	5.73449e-05
SiJWC01BAU_pcr_1	-3.37202	-3.6089	-3.46373	-3.60479	-3.51236	0.115361	4	60.8933	9.75757e-06		SiJWC04BCO_pcr_1	2.57158	2.9458	2.77103	2.70146	2.74747	0.155929	4	35.2401	5.02462e-05
SiJWB10ADU_pcr_1	-3.06076	-3.51427	-4.07012	-3.40135	-3.51163	0.419272	4	16.7511	0.000463232		SiJWA01ABT_pcr_2	1.42316	1.65065	3.95854	3.97008	2.75061	1.40454	4	3.91673	0.0295896
SiJWB04ADV_pcr_1	-2.81256	-3.33799	-3.81607	-4.06199	-3.50715	0.552073	4	12.7054	0.00105173		SiJWG09ADG_pcr_1	2.08502	2.33181	3.23477	3.35626	2.75197	0.637605	4	8.6322	0.00326974
SiJWD10BCN_pcr_1	-2.68462	-2.68475	-4.3356	-4.31055	-3.50388	0.945982	4	7.40792	0.00508863		SiJWA12BCK_pcr_1	3.25475	3.04873	2.08321	2.62227	2.75224	0.517983	4	10.6268	0.00178072
SiJWA10BBW_pcr_1	-3.40896	-3.74828	-3.54514	-3.29455	-3.49923	0.195086	4	35.8738	4.7635e-05		SiJWA09BBM_pcr_1	2.41609	3.06647	2.88054	2.65575	2.75472	0.281358	4	19.5816	0.000290981
SiJWC02ACR_pcr_2	-2.4486	-2.22646	-4.76473	-4.55172	-3.49788	1.34573	4	5.19847	0.0138298		SiJWG03BBG_pcr_1	1.05303	1.10626	4.17599	4.68693	2.75555	1.9465	4	2.83128	0.0661196
SiJWF06ABQ_pcr_2	-2.7536	-2.63773	-4.03386	-4.54052	-3.49143	0.943046	4	7.40458	0.00509524		SiJWB03BBF_pcr_1	1.68113	2.78226	3.23013	3.33364	2.75679	0.755979	4	7.2933	0.00532181
SiJWD09ACI_pcr_2	-2.94463	-2.95759	-3.43228	-4.62223	-3.48918	0.788705	4	8.84788	0.00304323		SiJWG04BAD_pcr_1	2.66609	3.19299	2.6468	2.53169	2.75939	0.295092	4	18.7019	0.000333703
SiJWB12BDH_pcr_1	-4.25328	-3.40088	-3.21757	-3.06643	-3.48454	0.530422	4	13.1387	0.000952416		SiJWG07ADU_pcr_1	1.34849	2.26647	3.18692	4.23859	2.76012	1.23887	4	4.45586	0.02104
SiJWD02ABN_pcr_2	-2.56159	-2.83795	-4.28741	-4.22715	-3.47852	0.906613	4	7.67366	0.00459757		SiJWG10ABB_pcr_2	1.26038	2.35362	3.98031	3.44824	2.76064	1.20787	4	4.57109	0.0196437
SiJWF09ADA_pcr_1	-4.5699	-4.58625	-2.52551	-2.22564	-3.47682	1.27751	4	5.44312	0.0121765		SiJWD01BCN_pcr_1	1.3686	1.68139	3.60472	4.39718	2.76297	1.4712	4	3.75609	0.0329783
SiJWD03ADW_pcr_1	-3.64789	-3.46791	-3.38749	-3.40253	-3.47646	0.119503	4	58.1817	1.11854e-05		SiJWF03BBH_pcr_1	2.04259	2.28665	3.21213	3.53203	2.76835	0.71622	4	7.73046	0.00450083
SiJWD06ACG_pcr_2	-3.85256	-3.06319	-3.69102	-3.27857	-3.47133	0.363929	4	19.077	0.000314531		SiJWC10BBD_pcr_1	2.34004	2.63851	2.84796	3.25033	2.76921	0.382514	4	14.479	0.000714244
SiJWD01BBW_pcr_1	-3.28647	-3.47028	-3.67115	-3.42265	-3.46264	0.159339	4	43.4626	2.68099e-05		SiJWA04ABG_pcr_2	3.21522	3.25755	2.35891	2.24791	2.7699	0.540832	4	10.2431	0.00198368
SiJWD04BBV_pcr_1	NA	-2.58634	-4.16422	-3.63047	-3.46034	0.802581	3	7.46777	0.0174632		SiJWC06ACG_pcr_2	2.27831	2.85694	2.98978	2.98764	2.77817	0.338979	4	16.3914	0.000494124
SiJWA03BDL_pcr_1	-3.04136	-2.961	-3.92421	-3.90557	-3.45804	0.528604	4	13.0837	0.000964326		SiJWC09ABY_pcr_2	2.01874	2.20664	3.45383	3.4389	2.77953	0.773834	4	7.18378	0.00555796
SiJWE11AAI_pcr_2	-2.5561	-2.61108	-4.26233	-4.37632	-3.45146	1.00346	4	6.87914	0.00629184		SiJWD10AAZ_pcr_1	1.33135	1.28915	4.24705	4.25416	2.78043	1.69771	4	3.27551	0.0465831
SiJWA04BAO_pcr_1	-1.90331	-1.84689	-5.09887	-4.94903	-3.44952	1.81916	4	3.79243	0.0321699		SiJWF06BBV_pcr_1	3.22703	3.51777	1.86631	2.51966	2.78269	0.740877	4	7.51189	0.00488864
SiJWE01BDQ_pcr_1	-3.53651	-4.29308	-3.0032	-2.94994	-3.44568	0.623934	4	11.045	0.00158965		SiJWD04CAB_pcr_1	1.56135	1.58002	3.85453	4.15677	2.78817	1.41125	4	3.95133	0.0289189
SiJWD07ABL_pcr_2	-3.65956	-3.51856	-3.25212	-3.34873	-3.44474	0.180664	4	38.1343	3.9669e-05		SiJWG04BCY_pcr_1	1.50857	1.50628	4.41901	3.73254	2.7916	1.50909	4	3.69972	0.0342847
SiJWD01BAY_pcr_1	-2.88471	-2.332	-4.28134	-4.26869	-3.44168	0.988363	4	6.96441	0.00607417		SiJWH07BDD_pcr_1	2.52643	2.26673	2.92702	3.44726	2.79186	0.514467	4	10.8534	0.00167362
SiJWD01BAM_pcr_1	-2.81477	-2.54055	-3.99747	-4.40849	-3.44032	0.90345	4	7.61597	0.00469869		SiJWH03AAR_pcr_2	2.24345	2.37569	3.22398	3.33143	2.79364	0.563264	4	9.91947	0.00217942
SiJWG08BDK_pcr_1	-3.2771	-3.05622	-3.88912	-3.51547	-3.43448	0.356422	4	19.272	0.000305139		SiJWA10ABP_pcr_2	1.09456	1.6183	4.1414	4.32213	2.7941	1.67541	4	3.33541	0.0445394
SiJWD04BDV_pcr_1	-0.940303	-0.934435	-5.47311	-6.37875	-3.43165	2.90378	4	2.36357	0.0990788		SiJWC07ACC_pcr_2	2.22357	2.34735	3.4913	3.13425	2.79912	0.612855	4	9.13468	0.00277309
SiJWF02ADY_pcr_newprimers	-2.82964	-3.00403	-4.01726	-3.87333	-3.43106	0.600913	4	11.4195	0.00144101		SiJWC07BCQ_pcr_1	1.60765	1.94352	3.65274	4.0082	2.80303	1.20307	4	4.65979	0.01865
SiJWC05BBK_pcr_1	-2.94198	-3.18479	-3.73876	-3.84352	-3.42726	0.433815	4	15.8006	0.000551095		SiJWA06BAL_pcr_1	1.22739	1.83236	4.10507	4.04885	2.80342	1.49133	4	3.75961	0.0328988
SiJWH06ADW_pcr_1	-2.68883	-3.28843	-3.85335	-3.8461	-3.41918	0.554158	4	12.3401	0.00114642		SiJWB11BEA_pcr_2	2.98088	2.60364	2.86789	2.78684	2.80981	0.158822	4	35.3831	4.96404e-05
SiJWB09BCW_pcr_1	-2.69216	-2.87955	-4.01927	-4.0267	-3.40442	0.718348	4	9.47848	0.00248955		SiJWH01BCO_pcr_1	1.70488	1.69905	3.57027	4.28637	2.81514	1.31821	4	4.27114	0.0235585
SiJWH09CAM_pcr_1	-1.83463	-1.38047	-5.31346	-5.08296	-3.40288	2.08347	4	3.26655	0.0468988		SiJWD03BDB_pcr_1	2.90289	2.84044	2.79988	2.72167	2.81622	0.0759484	4	74.1613	5.40323e-06
SiJWE04ACN_pcr_2	-1.89666	-2.14303	-4.71065	-4.85547	-3.40145	1.5996	4	4.25287	0.0238283		SiJWE12BCQ_pcr_1	2.00843	1.71469	3.6198	3.92932	2.81806	1.11813	4	5.04069	0.015054
SiJWA12ACD_pcr_2	-2.93229	-3.04884	-4.14097	-3.46238	-3.39612	0.546177	4	12.436	0.0011205		SiJWC11BAK_pcr_2	1.99817	2.60725	3.28809	3.38941	2.82073	0.6491	4	8.6912	0.00320561
SiJWG08BCF_pcr_1	-2.70231	-2.66977	-4.25336	-3.92894	-3.3886	0.822086	4	8.24389	0.0037371		SiJWH02CAE_pcr_1	1.55536	1.71812	4.06795	3.94729	2.82218	1.37133	4	4.11598	0.0259827
SiJWH03ACK_pcr_2	-3.08357	-3.16074	-3.51002	-3.79585	-3.38754	0.329424	4	20.5664	0.000251368		SiJWB03BBM_pcr_1	1.29307	1.55637	3.68304	4.75902	2.82287	1.67659	4	3.3674	0.0434945
SiJWD07ADG_pcr_1	-3.96823	-3.82769	-2.99559	-2.7349	-3.3816	0.608376	4	11.1168	0.00155963		SiJWG02ABR_pcr_2	2.30744	2.17945	3.41706	3.40939	2.82833	0.677398	4	8.35059	0.00360032
SiJWH11ABU_pcr_2	-2.95242	-3.00429	-3.77937	-3.7873	-3.38085	0.465245	4	14.5336	0.000706315		SiJWF05ABC_pcr_2	1.95577	1.54726	3.80861	4.0117	2.83083	1.26013	4	4.49292	0.0205773
SiJWA08ACJ_pcr_2	-3.12812	-3.54247	-3.39939	-3.41113	-3.37028	0.17398	4	38.7434	3.78302e-05		SiJWE02AEA_pcr_1	2.98067	2.70313	2.75609	2.8945	2.83359	0.126974	4	44.6325	2.4759e-05
SiJWC05ACC_pcr_2	-2.02093	-2.30504	-4.62707	-4.51616	-3.3673	1.39619	4	4.82357	0.0169801		SiJWF10ACW_pcr_2	1.90101	1.86457	3.91785	3.65371	2.83428	1.10407	4	5.13425	0.0143118
SiJWB05ABU_pcr_2	-2.78558	-3.19702	-3.60196	-3.88296	-3.36688	0.479015	4	14.0575	0.000779632		SiJWB07BDG_pcr_1	2.06785	2.58833	2.9123	3.76913	2.8344	0.713659	4	7.94329	0.0041613
SiJWD02CAU_pcr_1	-2.47244	-2.76729	-4.11602	-4.09662	-3.36309	0.866642	4	7.7612	0.00444958		SiJWB02BBS_pcr_1	1.96619	2.72283	3.23484	3.42024	2.83602	0.650586	4	8.71837	0.00317665
SiJWE04CAM_pcr_1	-1.72982	-1.91333	-4.67679	-5.13056	-3.36262	1.79064	4	3.75578	0.0329852		SiJWG03ADE_pcr_1	2.14903	2.08958	3.71615	3.40672	2.84037	0.842494	4	6.74277	0.00666183
SiJWB06BBV_pcr_1	-2.90777	-3.03095	-3.76269	-3.7213	-3.35568	0.449223	4	14.9399	0.000650829		SiJWD12ADR_pcr_1	2.30099	2.63687	3.18257	3.25192	2.84309	0.454161	4	12.5202	0.00109839
SiJWB10ACT_pcr_2	-3.35289	-3.50132	-2.80707	-3.75015	-3.35286	0.39907	4	16.8034	0.000458958		SiJWC12CAE_pcr_1	1.20961	1.27155	4.19482	4.69957	2.84389	1.86294	4	3.05311	0.0552921
SiJWG06AAB_pcr_1	-2.64223	-2.81351	-3.98868	-3.95574	-3.35004	0.721944	4	9.2806	0.00264778		SiJWG02BCP_pcr_1	2.65192	2.3842	3.27516	3.06544	2.84418	0.401351	4	14.173	0.000760944
SiJWA10ADK_pcr_1	-3.36758	-3.78296	-3.15726	-3.0618	-3.3424	0.320284	4	20.8715	0.000240565		SiJWA01AAR_pcr_2	3.28736	3.14404	2.37375	2.57806	2.8458	0.439107	4	12.9618	0.0009914
SiJWD11CAM_pcr_1	-4.45624	-3.5524	-2.52895	-2.83113	-3.34218	0.857874	4	7.79176	0.00439939		SiJWC03CAC_pcr_1	1.5282	2.02806	4.11501	3.71865	2.84748	1.26195	4	4.51285	0.020334
SiJWG08BCK_pcr_1	-3.47076	-3.37528	-3.15424	-3.35678	-3.33927	0.133079	4	50.1849	1.74233e-05		SiJWF04ADG_pcr_1	2.0959	2.26739	3.61349	3.42529	2.85052	0.779309	4	7.3155	0.00527557
SiJWG12BAU_pcr_1	-3.84852	-3.81614	-2.7988	-2.88124	-3.33617	0.57405	4	11.6233	0.00136783		SiJWD10AAY_pcr_2	0.922027	0.778993	4.58701	5.11958	2.8519	2.32195	4	2.45647	0.0911528
SiJWE10BAW_pcr_1	-2.92197	-2.70797	-3.89964	-3.80069	-3.33257	0.605371	4	11.01	0.00160457		SiJWB06BAF_pcr_1	2.2725	2.57615	3.40022	3.16533	2.85355	0.519817	4	10.9791	0.00161791
SiJWE09ADM_pcr_1	-3.14793	-3.21102	-3.33121	-3.63463	-3.33119	0.216103	4	30.8296	7.49761e-05		SiJWG03CAI_pcr_1	2.58805	2.75597	3.18079	2.89569	2.85513	0.25091	4	22.7581	0.000185802
SiJWH03CAJ_pcr_1	-3.87361	-3.8316	-3.00491	-2.59462	-3.32618	0.630747	4	10.5468	0.00182065		SiJWE06CAK_pcr_1	2.29605	2.61715	3.17702	3.33532	2.85638	0.484215	4	11.798	0.00130896
SiJWE02CAW_pcr_1	-2.43498	-1.81344	-4.08928	-4.95702	-3.32368	1.45196	4	4.5782	0.0195615		SiJWG09BBA_pcr_1	2.85195	2.9528	2.58113	3.05471	2.86015	0.2036	4	28.0957	9.89857e-05
SiJWC01BDU_pcr_1	-2.72129	-3.4126	-3.46605	-3.69148	-3.32286	0.418855	4	15.8664	0.00054433		SiJWA07ADN_pcr_1	2.45451	2.18508	3.13221	3.67225	2.86101	0.671762	4	8.51793	0.00339882
SiJWD11ADJ_pcr_1	-2.72852	-2.42611	-4.24141	-3.85806	-3.31353	0.87316	4	7.58973	0.00474564		SiJWG11ABB_pcr_2	2.34759	2.46964	3.32042	3.31652	2.86355	0.527664	4	10.8537	0.0016735
SiJWD11BBI_pcr_1	-3.70822	-3.12382	-3.21185	-3.19916	-3.31076	0.267807	4	24.725	0.000145048		SiJWB03CAI_pcr_1	2.79661	2.55759	3.08846	3.01467	2.86433	0.239103	4	23.959	0.000159349
SiJWH06AAG_pcr_2	-3.64497	-3.78912	-2.84309	-2.95563	-3.3082	0.477957	4	13.8431	0.000815965		SiJWB08ACP_pcr_2	2.78535	2.87122	2.97479	2.82717	2.86463	0.081378	4	70.4031	6.31509e-06
SiJWG10ABX_pcr_2	-2.02758	-2.03708	-4.7542	-4.39197	-3.30271	1.47435	4	4.48023	0.0207342		SiJWB11BDB_pcr_1	1.09296	1.13752	4.41098	4.82515	2.86665	2.02949	4	2.82499	0.0664637
SiJWG08ABE_pcr_2	-3.42758	-3.70544	-2.88778	-3.18951	-3.30258	0.347737	4	18.9947	0.000318609		SiJWC05CAJ_pcr_1	2.17534	2.20297	3.55676	3.56064	2.87393	0.79079	4	7.26849	0.00537413
SiJWE05BDO_pcr_1	-2.62515	-2.77648	-3.85858	-3.94769	-3.30197	0.697851	4	9.46327	0.00250126		SiJWF09ABK_pcr_2	2.34182	1.93652	3.34411	3.8855	2.87699	0.89558	4	6.42486	0.00764265
SiJWA07AA1_pcr_1	-1.88583	-2.84441	-4.40917	-4.05995	-3.29984	1.15689	4	5.70465	0.0106835		SiJWA09BCU_pcr_1	2.54426	2.79542	3.07342	3.10304	2.87904	0.262696	4	21.9192	0.000207852
SiJWA11CAE_pcr_1	-1.79051	-2.00557	-4.49337	-4.90125	-3.29768	1.62709	4	4.05347	0.0270501		SiJWA05BCY_pcr_1	2.32285	2.50705	3.26163	3.43225	2.88094	0.547762	4	10.519	0.00183485
SiJWD05BAR_pcr_1	-2.5849	-2.4809	-3.84543	-4.23572	-3.28674	0.885936	4	7.4198	0.00506523		SiJWB12ADT_pcr_1	2.8735	2.72693	2.84891	3.08379	2.88328	0.148241	4	38.9	3.73757e-05
SiJWA07CAK_pcr_1	NA	-1.63687	-2.60242	-5.61214	-3.28381	2.07338	3	2.74321	0.111163		SiJWB06ACV_pcr_2	0.963213	0.982398	4.5574	5.0359	2.88473	2.21634	4	2.60315	0.0801575
SiJWA03ABV_pcr_2	-3.62199	-3.72085	-2.84896	-2.92644	-3.27956	0.455378	4	14.4037	0.000725381		SiJWC01CAK_pcr_1	1.85555	2.59451	3.44319	3.6519	2.88628	0.825401	4	6.99365	0.00600182
SiJWD01BCA_pcr_1	-2.48412	-2.42049	-4.07651	-4.12586	-3.27675	0.95255	4	6.87995	0.00628973		SiJWE09BCQ_pcr_1	2.3181	1.94422	3.48498	3.79927	2.88664	0.894854	4	6.45164	0.00755297
SiJWG01AEA_pcr_1	-3.57405	-3.47048	-2.95227	-3.10079	-3.2744	0.295607	4	22.1537	0.000201351		SiJWF09ACB_pcr_2	2.15896	2.08351	3.56439	3.74354	2.8876	0.888472	4	6.50015	0.00739405
SiJWH10ABP_pcr_2	-2.71659	-2.75592	-3.63961	-3.9621	-3.26856	0.628796	4	10.3962	0.00189917		SiJWH03BDI_pcr_1	2.90285	1.30402	3.56016	3.78665	2.88842	1.1208	4	5.15419	0.0141598
SiJWE03ABK_pcr_2	-2.23019	-2.2713	-4.19811	-4.36185	-3.26536	1.1736	4	5.56468	0.0114507		SiJWE08BCX_pcr_1	1.74596	2.02208	3.86436	3.94615	2.89464	1.17287	4	4.936	0.0159451
SiJWG09CAO_pcr_1	-2.67296	-2.89286	-3.8361	-3.63656	-3.25962	0.563649	4	11.5661	0.00138785		SiJWD05BBU_pcr_1	2.28462	2.09075	3.52114	3.68993	2.89661	0.825293	4	7.0196	0.00593856
SiJWD11ADI_pcr_1	-1.87033	-1.74806	-4.725	-4.68799	-3.25784	1.67357	4	3.89329	0.0300552		SiJWH12BBC_pcr_1	2.64031	2.92301	2.9986	3.03287	2.8987	0.178267	4	32.5209	6.39008e-05
SiJWH03ACX_pcr_1	-1.31377	-1.47	-5.33145	-4.90388	-3.25477	2.15909	4	3.01494	0.0569874		SiJWA02BDW_pcr_2	3.90458	4.2882	1.53495	1.86824	2.89899	1.39811	4	4.147	0.0254733
SiJWA01BAI_pcr_2	-2.86733	-3.13714	-3.33853	-3.65892	-3.25048	0.333781	4	19.4767	0.000295677		SiJWH05BAS_pcr_1	4.0494	3.85712	1.8269	1.86656	2.9	1.21884	4	4.7586	0.0176183
SiJWB09CAS_pcr_1	-2.26833	-2.18033	-4.15443	-4.39599	-3.24977	1.18872	4	5.46769	0.012025		SiJWD12ADC_pcr_1	2.92953	3.21777	2.65984	2.79551	2.90066	0.238358	4	24.3387	0.000152035
SiJWA03ACS_pcr_1	-2.31765	-2.18935	-4.53035	-3.95649	-3.24846	1.17369	4	5.53546	0.0116199		SiJWG03BDW_pcr_2	2.2897	2.64134	3.22178	3.45012	2.90074	0.530892	4	10.9278	0.00164035
SiJWH01BDA_pcr_1	-2.05824	-1.96825	-4.45276	-4.50783	-3.24677	1.425	4	4.55686	0.0198095		SiJWA09BAO_pcr_1	1.6845	1.97467	4.04123	3.91643	2.90421	1.24755	4	4.65586	0.0186926
SiJWD03ADZ_pcr_1	-2.59009	-2.53739	-4.04644	-3.78323	-3.23929	0.787712	4	8.22455	0.00376262		SiJWG05BCO_pcr_1	2.32692	2.45411	3.51383	3.33469	2.90739	0.603536	4	9.63451	0.0023735
SiJWG08ACU_pcr_2	-2.00425	-2.02202	-4.38298	-4.54642	-3.23892	1.417	4	4.57152	0.0196388		SiJWD06AAA_pcr_2	3.13118	3.26189	2.56292	2.69467	2.91267	0.336428	4	17.3152	0.000419754
SiJWH11AAF_pcr_2	-1.76682	-2.01953	-4.41511	-4.72418	-3.23141	1.55383	4	4.15928	0.0252751		SiJWF01BBW_pcr_1	2.67207	3.28243	2.72174	2.97972	2.91399	0.280209	4	20.7987	0.000243085
SiJWG12BCZ_pcr_1	-3.28409	-3.45647	-3.34734	-2.81959	-3.22687	0.2807	4	22.9916	0.000180223		SiJWA12BBL_pcr_1	2.65955	2.26001	3.40659	3.33287	2.91475	0.550922	4	10.5814	0.00180324
SiJWG05BAP_pcr_1	-2.18746	-2.05622	-4.31618	-4.34597	-3.22646	1.27668	4	5.05443	0.0149419		SiJWG07ABR_pcr_2	2.95688	2.66768	2.93676	3.11225	2.91839	0.184621	4	31.615	6.95394e-05
SiJWH10ABW_pcr_2	-1.8482	-1.59978	-4.64653	-4.80324	-3.22444	1.73671	4	3.71327	0.0339646		SiJWE05BAD_pcr_1	2.75172	2.81294	3.07797	3.03737	2.92	0.161773	4	36.1001	4.67464e-05
SiJWE05AAR_pcr_2	-1.44222	-1.914	-4.96708	-4.56813	-3.22286	1.80147	4	3.57804	0.0373382		SiJWA12BBZ_pcr_1	2.76821	2.65114	3.07967	3.18593	2.92124	0.252676	4	23.1225	0.000177195
SiJWH11ABN_pcr_2	-1.97302	-1.5647	-5.06861	-4.26244	-3.21719	1.7126	4	3.75709	0.0329556		SiJWF04BCJ_pcr_1	2.99046	2.84376	2.90588	2.96004	2.92503	0.0644913	4	90.711	2.95325e-06
SiJWB06ADY_pcr_newprimers	-3.11986	-3.71186	-2.73797	-3.29784	-3.21688	0.404279	4	15.9142	0.000539483		SiJWE09AAQ_pcr_2	2.85435	2.9284	2.91506	3.04215	2.93499	0.0783709	4	74.8999	5.24503e-06
SiJWH03BCT_pcr_1	-2.90899	-2.93959	-3.1112	-3.89963	-3.21485	0.465109	4	13.8241	0.000819298		SiJWD08ADF_pcr_1	2.58128	2.65631	3.07462	3.43094	2.93579	0.395069	4	14.8622	0.000660984
SiJWB06ADY_pcr_1	-3.58429	-3.56997	-2.90134	-2.80355	-3.21479	0.420338	4	15.2962	0.000606845		SiJWA08BCL_pcr_1	2.51254	2.39018	3.43442	3.40709	2.93606	0.562016	4	10.4483	0.00187152
SiJWC04AAP_pcr_2	-2.79841	-2.85293	-3.53622	-3.66034	-3.21197	0.449485	4	14.2918	0.000742348		SiJWA06BDU_pcr_1	2.69306	2.588	3.13989	3.33906	2.94	0.357812	4	16.4332	0.000490391
SiJWD05ADD_pcr_1	-2.91316	-3.10638	-3.64182	-3.18193	-3.21082	0.30882	4	20.7941	0.000243245		SiJWE09BDU_pcr_1	1.73792	1.82464	3.92797	4.27905	2.94239	1.34884	4	4.36284	0.0222622
SiJWF10BDK_pcr_1	-2.16454	-2.40479	-4.04464	-4.18198	-3.19899	1.06179	4	6.02563	0.00916209		SiJWA01BBG_pcr_1	2.30547	2.31166	3.47005	3.68265	2.94246	0.737086	4	7.98403	0.00410021
SiJWE02BBG_pcr_1	-2.4304	-2.47277	-4.20164	-3.69013	-3.19873	0.887816	4	7.20585	0.00550929		SiJWE10AAC_pcr_1	3.36905	3.30748	2.69051	2.40564	2.94317	0.471477	4	12.4849	0.00110758
SiJWE02BDN_pcr_1	-2.26048	-2.20557	-4.32966	-3.99632	-3.19801	1.12277	4	5.69664	0.0107255		SiJWF02ACE_pcr_2	2.98366	3.32443	2.70662	2.78206	2.94919	0.276144	4	21.3598	0.000224525
SiJWH10CAO_pcr_1	-1.98418	-2.08288	-4.32828	-4.36728	-3.19065	1.33683	4	4.77345	0.0174697		SiJWG08ACR_pcr_2	2.7575	3.16921	3.0359	2.86408	2.95667	0.182292	4	32.4389	6.43857e-05
SiJWG01CAR_pcr_1	-5.41616	-3.73875	-1.95037	-1.65256	-3.18946	1.74712	4	3.6511	0.0354651		SiJWD06ABH_pcr_2	2.67781	3.26283	2.73924	3.15276	2.95816	0.292811	4	20.2052	0.00026501
SiJWG01BBT_pcr_1	-4.00651	-2.7315	-3.0579	-2.95957	-3.18887	0.56198	4	11.3487	0.00146766		SiJWC11BBF_pcr_1	2.81835	2.8936	2.95138	3.17298	2.95908	0.152653	4	38.7688	3.77559e-05
SiJWF02BDM_pcr_1	-2.74678	-3.29037	-3.26377	-3.43698	-3.18448	0.301572	4	21.1192	0.000232244		SiJWB02BDM_pcr_1	2.17908	2.5462	3.37614	3.73526	2.95917	0.720014	4	8.21976	0.00376899
SiJWD05ADE_pcr_1	-3.43117	-3.57552	-2.85836	-2.8636	-3.18216	0.375526	4	16.9477	0.000447424		SiJWG08BDI_pcr_1	2.36267	2.4773	3.53466	3.51019	2.9712	0.638291	4	9.30987	0.00262355
SiJWD04ACO_pcr_2	-2.97476	-3.06687	-3.5637	-3.12217	-3.18187	0.261711	4	24.3159	0.000152461		SiJWB03BAJ_pcr_2	1.43129	1.25601	4.47184	4.7264	2.97138	1.88378	4	3.15471	0.0510793
SiJWD04ADP_pcr_1	-3.57158	-3.54331	-2.83989	-2.76672	-3.18038	0.43658	4	14.5695	0.000701165		SiJWF11BBU_pcr_1	2.67275	2.82187	3.21828	3.17313	2.97151	0.266582	4	22.2933	0.00019761
SiJWC07ABU_pcr_2	-3.49531	-3.87798	-2.70875	-2.63225	-3.17857	0.607917	4	10.4572	0.00186682		SiJWD05ACV_pcr_2	2.12313	2.0645	3.68622	4.02126	2.97378	1.02554	4	5.79947	0.0102017
SiJWG06BAH_pcr_2	-3.00062	-2.96111	-3.47166	-3.24085	-3.16856	0.236878	4	26.7527	0.000114601		SiJWD06BDD_pcr_1	2.77615	2.0945	3.44939	3.57903	2.97477	0.684281	4	8.69458	0.00320199
SiJWD06AAR_pcr_2	-3.4248	-3.35347	-2.87933	-3.01587	-3.16837	0.262563	4	24.1341	0.000155919		SiJWB05ACJ_pcr_2	2.46605	2.49808	3.22297	3.72068	2.97694	0.606633	4	9.81465	0.00224827
SiJWF12CAM_pcr_1	-2.85788	-2.88512	-3.40768	-3.50481	-3.16387	0.340105	4	18.6053	0.000338895		SiJWG07BCD_pcr_1	2.4825	2.34005	3.49131	3.59876	2.97815	0.658613	4	9.04371	0.00285521
SiJWA09BDD_pcr_1	-2.60086	-2.95283	-3.63376	-3.42721	-3.15367	0.465919	4	13.5374	0.000871761		SiJWB01ADN_pcr_1	1.29545	1.6717	4.30928	4.6362	2.97816	1.73775	4	3.4276	0.0416109
SiJWG09CAL_pcr_1	-3.48363	-3.64132	-2.7607	-2.71306	-3.14968	0.481379	4	13.0861	0.000963801		SiJWD06BBB_pcr_1	2.89277	2.70764	3.69278	2.62113	2.97858	0.48943	4	12.1716	0.00119391
SiJWG07CAH_pcr_1	-2.69004	-2.42391	-3.77899	-3.70388	-3.1492	0.693104	4	9.08725	0.00281551		SiJWB04BAJ_pcr_2	1.5076	2.30906	4.03624	4.07914	2.98301	1.28346	4	4.64837	0.0187741
SiJWE06BBI_pcr_1	-3.06378	-3.17256	-3.19036	-3.16825	-3.14874	0.057441	4	109.634	1.67304e-06		SiJWC02ABB_pcr_2	3.44081	3.31403	2.63916	2.54705	2.98526	0.457321	4	13.0554	0.000970505
SiJWB07BCE_pcr_1	-2.62611	-2.78998	-3.59835	-3.56178	-3.14405	0.508106	4	12.3756	0.00113673		SiJWB06BAC_pcr_1	2.61989	3.30258	3.00163	3.0313	2.98885	0.280786	4	21.2892	0.000226755
SiJWH12ABI_pcr_2	-2.22355	-2.33418	-4.14451	-3.86551	-3.14194	1.0041	4	6.25824	0.00823318		SiJWF05AAX_pcr_2	3.44762	3.0896	2.74934	2.67125	2.98945	0.355366	4	16.8246	0.000457236
SiJWB02BBR_pcr_1	-3.63042	-4.01013	-2.23094	-2.69273	-3.14105	0.821394	4	7.6481	0.00464201		SiJWD08BAC_pcr_1	2.28404	2.1443	3.65055	3.88563	2.99113	0.904076	4	6.61699	0.00702888
SiJWC06BBX_pcr_1	-2.89941	-2.44134	-3.72152	-3.49402	-3.13907	0.580085	4	10.8228	0.00168757		SiJWF09ADH_pcr_1	2.3893	2.41138	3.45884	3.71159	2.99278	0.691885	4	8.65108	0.00324903
SiJWG03ABX_pcr_2	-2.61736	-2.85505	-3.74683	-3.32814	-3.13684	0.502641	4	12.4815	0.00110848		SiJWD06AAV_pcr_2	2.49781	3.05487	3.42358	2.99861	2.99372	0.380559	4	15.7333	0.000558127
SiJWA02BCC_pcr_1	-2.60253	-5.30428	-2.5827	-2.05068	-3.13505	1.46857	4	4.26953	0.0235822		SiJWE06AAE_pcr_2	2.89552	2.79962	3.09677	3.1858	2.99443	0.177795	4	33.6841	5.75202e-05
SiJWH10AAY_pcr_1	-2.86662	-3.17812	-3.10343	-3.38639	-3.13364	0.214534	4	29.2135	8.80825e-05		SiJWE01AAK_pcr_2	2.54725	2.88212	3.22247	3.32979	2.99541	0.354521	4	16.8983	0.000451326
SiJWD07ABN_pcr_2	-3.17325	-3.29307	-3.1501	-2.90024	-3.12916	0.164977	4	37.9345	4.02979e-05		SiJWD06BDK_pcr_1	2.1146	2.30972	3.4338	4.12695	2.99627	0.951938	4	6.29509	0.00809756
SiJWF08AAW_pcr_2	-3.90305	-3.36973	-2.79065	-2.45078	-3.12855	0.640721	4	9.76573	0.0022814		SiJWG11AAK_pcr_2	2.9859	3.01143	2.9793	3.03319	3.00245	0.024735	4	242.769	1.54121e-07
SiJWE11BBZ_pcr_1	-1.64851	-1.52784	-4.5906	-4.72807	-3.12375	1.77471	4	3.5203	0.0389088		SiJWH08AAI_pcr_2	3.10722	3.24612	2.59131	3.06742	3.00302	0.284959	4	21.0768	0.00023364
SiJWD05CAB_pcr_1	-3.26031	-3.26567	-2.92363	-3.04531	-3.12373	0.168318	4	37.1169	4.30152e-05		SiJWG03AAZ_pcr_2	3.69303	3.61592	2.24356	2.46502	3.00438	0.756743	4	7.94029	0.00416585
SiJWA01ABE_pcr_2	-3.03914	-2.60999	-3.53821	-3.29664	-3.121	0.396968	4	15.7242	0.000559088		SiJWH05CAI_pcr_1	2.07147	2.06864	3.86576	4.01522	3.00527	1.08162	4	5.55698	0.0114949
SiJWD07AAQ_pcr_2	-2.38546	-2.38396	-3.83993	-3.86482	-3.11854	0.847419	4	7.36009	0.00518426		SiJWC10ACQ_pcr_2	2.8123	2.8964	3.2862	3.03935	3.00856	0.207471	4	29.0023	9.0016e-05
SiJWF11CAK_pcr_1	-3.04011	-3.39389	-3.03947	-2.99956	-3.11826	0.184731	4	33.7599	5.71342e-05		SiJWG09BCH_pcr_1	2.387	2.11294	3.86091	3.67688	3.00943	0.887247	4	6.78375	0.0065477
SiJWB03BEA_pcr_2	-2.98309	-3.12587	-3.30852	-3.0538	-3.11782	0.139858	4	44.5855	2.48373e-05		SiJWB04ADG_pcr_1	2.366	2.54865	3.47744	3.64892	3.01025	0.646606	4	9.31093	0.00262268
SiJWC10ADI_pcr_1	-2.26129	-1.94663	-4.27942	-3.98361	-3.11774	1.18381	4	5.26728	0.0133366		SiJWF11BBK_pcr_1	2.3288	2.7401	3.63856	3.33375	3.0103	0.587873	4	10.2413	0.00198469
SiJWB03BDX_pcr_1	-2.73122	-3.0032	-3.25853	-3.44008	-3.10826	0.308701	4	20.1377	0.00026767		SiJWC06BDQ_pcr_1	2.6147	2.34931	3.54081	3.56161	3.01661	0.6268	4	9.62542	0.00238006
SiJWD11BAH_pcr_2	-2.60982	-2.58692	-3.70117	-3.53138	-3.10732	0.591834	4	10.5007	0.00184425		SiJWC01BAQ_pcr_1	1.77244	1.80895	4.12904	4.36404	3.01862	1.4212	4	4.24797	0.0239014
SiJWC07BCK_pcr_1	-2.78052	-2.55742	-3.42256	-3.66395	-3.10611	0.522304	4	11.8939	0.00127807		SiJWG04CAH_pcr_1	1.26719	1.56755	4.76317	4.48046	3.01959	1.85773	4	3.25083	0.0474596
SiJWG12AAT_pcr_2	-2.1613	-2.08971	-4.09643	-4.07447	-3.10548	1.13199	4	5.48677	0.0119091		SiJWD01ABU_pcr_2	2.73202	3.22892	2.95291	3.1716	3.02136	0.226611	4	26.6656	0.000115723
SiJWH01ACS_pcr_1	-3.43156	-3.82694	-2.52206	-2.60724	-3.09695	0.636437	4	9.73215	0.00230451		SiJWB12ADG_pcr_1	3.1968	3.21328	2.68225	3.00647	3.0247	0.246836	4	24.5078	0.000148923
SiJWB09BDT_pcr_1	-3.22673	-3.30065	-3.00503	-2.84039	-3.0932	0.210202	4	29.4307	8.61519e-05		SiJWF08BAU_pcr_1	2.0289	2.21783	3.86977	3.99459	3.02777	1.0484	4	5.77596	0.0103184
SiJWH10BCH_pcr_1	-4.52149	-4.50751	NA	-0.242462	-3.09048	2.46647	3	2.17026	0.162182		SiJWA04BDP_pcr_1	1.82093	1.95448	4.07486	4.27368	3.03099	1.32377	4	4.57934	0.0195485
SiJWG11BDN_pcr_1	-1.98849	-1.78697	-4.30487	-4.27418	-3.08863	1.38917	4	4.44672	0.0211562		SiJWF03CAQ_pcr_1	2.259	2.55794	3.75957	3.5526	3.03228	0.735449	4	8.24605	0.00373426
SiJWA11BCJ_pcr_1	-3.07799	-3.00197	-3.41052	-2.86391	-3.0886	0.232188	4	26.6042	0.000116524		SiJWE11ABX_pcr_2	2.25444	2.22909	3.87586	3.78506	3.03611	0.918041	4	6.61433	0.00703692
SiJWE03ACQ_pcr_2	-3.12493	-3.08441	-3.18435	-2.9588	-3.08812	0.0954857	4	64.6824	8.14214e-06		SiJWG02ADA_pcr_1	2.03735	2.0217	3.85083	4.24735	3.03931	1.1772	4	5.16363	0.0140886
SiJWD08BCV_pcr_1	-2.51409	-2.62916	-3.53589	-3.66138	-3.08513	0.597002	4	10.3354	0.00193215		SiJWB11AEA_pcr_1	3.55559	3.51151	2.54313	2.54721	3.03936	0.570929	4	10.6471	0.00177075
SiJWB04CAR_pcr_1	-3.13374	-3.84192	-2.69981	-2.65998	-3.08386	0.549032	4	11.2338	0.0015123		SiJWD02BDJ_pcr_1	1.69645	1.85863	3.84747	4.77377	3.04408	1.51203	4	4.02649	0.0275284
SiJWE04CAH_pcr_1	-3.18177	-3.63324	-2.75631	-2.75472	-3.08151	0.419132	4	14.7043	0.000682273		SiJWA05ACN_pcr_2	2.91451	2.93634	3.13823	3.20462	3.04843	0.144863	4	42.087	2.95219e-05
SiJWG12BDG_pcr_1	-3.38205	-2.81239	-3.24497	-2.88379	-3.0808	0.276016	4	22.3233	0.000196818		SiJWE12ABJ_pcr_2	1.70521	2.05205	4.02836	4.4361	3.05543	1.37631	4	4.44002	0.0212418
SiJWC09BAE_pcr_1	-2.64535	-2.82125	-3.69249	-3.13476	-3.07346	0.459654	4	13.3729	0.000903892		SiJWC06BAC_pcr_1	2.44571	4.95204	2.43646	2.39002	3.05606	1.26422	4	4.83468	0.016874
SiJWC05BEA_pcr_2	-1.81456	-1.85776	-4.40612	-4.20522	-3.07091	1.42824	4	4.30029	0.0231361		SiJWF02BBK_pcr_1	1.13719	2.32864	4.25759	4.50212	3.05639	1.60686	4	3.80418	0.0319138
SiJWA08CAP_pcr_1	-4.46064	-4.37972	-1.71892	-1.67796	-3.05931	1.57183	4	3.89267	0.0300677		SiJWE06AAL_pcr_2	2.49609	2.73285	3.54282	3.46386	3.05891	0.523206	4	11.6929	0.00134395
SiJWD06ABD_pcr_2	-3.52092	-2.96908	-2.86848	-2.87498	-3.05836	0.311775	4	19.6191	0.000289327		SiJWB10ABZ_pcr_2	3.41327	4.29047	2.23721	2.30903	3.0625	0.979757	4	6.25155	0.00825816
SiJWC08CAM_pcr_1	-2.6841	-2.42786	-3.45393	-3.64872	-3.05365	0.589496	4	10.3602	0.00191861		SiJWF07BAK_pcr_2	2.51122	2.41461	3.57391	3.79537	3.07378	0.712224	4	8.63149	0.00327052
SiJWF06BBH_pcr_1	-2.02869	-2.40683	-3.85171	-3.92364	-3.05272	0.976846	4	6.25016	0.00826336		SiJWD06BDO_pcr_1	2.96499	3.16228	2.92788	3.2454	3.07514	0.15319	4	40.1479	3.40026e-05
SiJWH09ADC_pcr_1	-2.08792	-2.213	-3.97911	-3.92779	-3.05195	1.04242	4	5.85553	0.00993012		SiJWH12CAG_pcr_1	0.715607	0.47395	5.44598	5.66826	3.07595	2.86814	4	2.14491	0.12129
SiJWF06AAA_pcr_1	-1.66076	-1.85737	-4.33972	-4.34403	-3.05047	1.49335	4	4.08542	0.0264978		SiJWH11ACH_pcr_2	3.22059	3.02247	3.03918	3.0589	3.08529	0.0914257	4	67.4927	7.16732e-06
SiJWA05ADK_pcr_1	-2.46762	-3.17794	-3.33984	-3.20779	-3.0483	0.393459	4	15.4949	0.000584026		SiJWF02BAG_pcr_2	2.79535	2.56453	3.3629	3.62003	3.0857	0.489311	4	12.6124	0.00107481
SiJWE04ACG_pcr_2	-1.94465	-1.95157	-4.58137	-3.70053	-3.04453	1.31612	4	4.62652	0.0190148		SiJWB11BAU_pcr_1	3.44555	3.34837	2.77722	2.77222	3.08584	0.36144	4	17.0753	0.000437555
SiJWE10AAS_pcr_2	-2.73364	-2.77154	-3.3315	-3.30493	-3.0354	0.32711	4	18.5589	0.000341425		SiJWA06ADC_pcr_1	3.23268	4.78348	2.25335	2.07471	3.08606	1.24083	4	4.97419	0.0156123
SiJWH05ADW_pcr_1	-2.43375	-2.35657	-3.51578	-3.82438	-3.03262	0.747442	4	8.11466	0.00391212		SiJWB10BBU_pcr_1	3.40161	3.98762	2.23481	2.7236	3.08691	0.767764	4	8.0413	0.0040163
SiJWF04BBA_pcr_1	-2.92619	-2.78246	-3.35926	-3.05731	-3.0313	0.245766	4	24.6682	0.000146048		SiJWE01AAD_pcr_2	3.77051	3.56856	2.50418	2.51325	3.08912	0.675261	4	9.14942	0.00276008
SiJWB06BBQ_pcr_1	-1.31324	-1.95858	-4.40949	-4.44232	-3.03091	1.63226	4	3.71375	0.0339533		SiJWB08BCB_pcr_1	2.90364	2.94796	3.27508	3.24255	3.09231	0.193569	4	31.9504	6.73768e-05
SiJWF04CAX_pcr_1	-2.08872	-1.91304	-4.06367	-4.05184	-3.02932	1.18971	4	5.09253	0.0146368		SiJWD04BDY_pcr_1	1.85483	2.054	3.8964	4.59655	3.10044	1.35628	4	4.57198	0.0196334
SiJWB09BCS_pcr_1	-1.88387	-1.7497	-4.17211	-4.30667	-3.02809	1.40084	4	4.32325	0.0228103		SiJWH08BCD_pcr_1	3.18408	2.89746	3.13773	3.1845	3.10094	0.137422	4	45.1302	2.39498e-05
SiJWH05BCY_pcr_1	-2.42239	-2.33528	-3.92496	-3.42375	-3.02659	0.776268	4	7.79781	0.00438956		SiJWE05BAN_pcr_1	2.49334	2.46039	3.60786	3.84399	3.10139	0.727683	4	8.52402	0.00339178
SiJWE11BDF_pcr_1	-3.64994	-3.94021	-2.41037	-2.10422	-3.02618	0.904389	4	6.69222	0.00680624		SiJWE02ACO_pcr_2	3.09893	3.43957	3.10698	2.76964	3.10378	0.273522	4	22.6949	0.000187352
SiJWC03ABI_pcr_2	-2.96612	-3.16188	-2.83919	-3.12879	-3.024	0.149998	4	40.3205	3.35686e-05		SiJWG03BAT_pcr_1	2.75881	3.05923	3.11502	3.50897	3.11051	0.308281	4	20.1797	0.000266011
SiJWE12CAR_pcr_1	-2.19343	-2.03325	-3.43534	-4.43388	-3.02398	1.12966	4	5.35378	0.0127487		SiJWC05ACM_pcr_2	3.40811	2.98984	3.02376	3.02161	3.11083	0.198796	4	31.2966	7.16776e-05
SiJWE05BAA_pcr_2	-2.7773	-2.8587	-3.12469	-3.32512	-3.02145	0.250979	4	24.0774	0.00015702		SiJWD06BCM_pcr_1	2.69722	2.62672	3.61017	3.51312	3.11181	0.521731	4	11.9288	0.00126708
SiJWE12AAA_pcr_2	-3.12472	-3.03147	-2.89418	-3.02996	-3.02008	0.0949163	4	63.6368	8.54989e-06		SiJWF05ABY_pcr_2	2.41962	2.17661	3.91426	3.94088	3.11284	0.946047	4	6.58073	0.00713961
SiJWC02ABR_pcr_2	-1.99253	-1.37608	-4.56529	-4.13735	-3.01781	1.56998	4	3.84439	0.0310574		SiJWB12BAS_pcr_1	2.3207	3.64868	3.23819	3.25521	3.11569	0.5629	4	11.0702	0.00157905
SiJWB03BBZ_pcr_1	-2.77969	-2.04422	-3.73489	-3.51121	-3.0175	0.766427	4	7.8742	0.00426769		SiJWB10BCH_pcr_1	3.68442	3.44096	2.62207	2.72133	3.1172	0.525491	4	11.8639	0.00128762
SiJWF05BCG_pcr_1	-2.38134	-1.67496	-3.63895	-4.35821	-3.01337	1.20979	4	4.98165	0.0155483		SiJWA04ADZ_pcr_1	3.51174	3.4784	2.89388	2.5848	3.11721	0.454405	4	13.7199	0.000837857
SiJWG03BBF_pcr_1	-2.66494	-2.72143	-3.31501	-3.3421	-3.01087	0.367718	4	16.376	0.000495508		SiJWG10ACG_pcr_2	3.24102	3.39125	2.89315	2.96913	3.12364	0.232662	4	26.8513	0.000113347
SiJWH04ACE_pcr_2	-2.59717	-2.77645	-3.21895	-3.43081	-3.00585	0.38542	4	15.5978	0.000572655		SiJWC04BDO_pcr_1	2.5701	2.34999	3.67177	3.91561	3.12687	0.781571	4	8.00151	0.00407436
SiJWD04BDH_pcr_1	-2.03373	-1.69097	-3.96025	-4.32067	-3.0014	1.33085	4	4.5105	0.0203624		SiJWE11ACI_pcr_2	1.54825	2.335	4.20403	4.44187	3.13229	1.41521	4	4.4266	0.0214148
SiJWD06BDQ_pcr_1	-1.80984	-1.75294	-4.00901	-4.4191	-2.99772	1.41463	4	4.23816	0.0240485		SiJWB12BAG_pcr_2	2.58713	2.47516	3.65802	3.81322	3.13338	0.699781	4	8.95533	0.0029381
SiJWF12BAN_pcr_1	-3.43264	-3.60928	-2.11656	-2.82652	-2.99625	0.675504	4	8.87115	0.00302004		SiJWD07AAD_pcr_2	3.00051	2.84566	3.3645	3.32509	3.13394	0.252061	4	24.8666	0.000142594
SiJWA07BDX_pcr_1	-2.59794	-2.65649	-3.51655	-3.17346	-2.98611	0.438101	4	13.6321	0.000853958		SiJWC10ABP_pcr_2	2.80519	2.51611	3.61618	3.60461	3.13552	0.560909	4	11.1802	0.00153376
SiJWA04CAX_pcr_1	-2.62765	-2.55799	-3.5306	-3.21107	-2.98183	0.468611	4	12.7262	0.00104665		SiJWG02BBZ_pcr_1	2.29101	2.59296	3.75927	3.89964	3.13572	0.812506	4	7.71864	0.00452074
SiJWB12ADJ_pcr_1	-2.6866	-2.71344	-3.25239	-3.27329	-2.98143	0.32524	4	18.3337	0.000354069		SiJWE06ACH_pcr_2	3.22658	3.46115	2.96279	2.89619	3.13668	0.259126	4	24.2097	0.000154469
SiJWE11ADM_pcr_1	-2.20325	-2.33669	-3.78374	-3.60015	-2.98096	0.826187	4	7.21618	0.00548668		SiJWB10ACE_pcr_2	3.78492	5.05175	1.31149	2.41741	3.14139	1.62648	4	3.86281	0.0306749
SiJWD04BDT_pcr_1	-2.8401	-3.26088	-3.0365	-2.77997	-2.97936	0.217308	4	27.4206	0.000106454		SiJWH08CAG_pcr_1	2.01725	2.1897	4.29298	4.07711	3.14426	1.20708	4	5.20972	0.0137476
SiJWB09ACX_pcr_1	-1.42055	-1.61779	-4.33776	-4.53183	-2.97698	1.68712	4	3.52906	0.0386651		SiJWA06CAH_pcr_1	3.49115	3.38415	2.88505	2.85009	3.15261	0.332327	4	18.973	0.000319698
SiJWC10BAC_pcr_1	-2.59574	-2.47836	-3.8092	-3.02007	-2.97584	0.602329	4	9.88113	0.00220427		SiJWA07CAH_pcr_1	3.04497	3.1225	3.22245	3.23198	3.15547	0.0887646	4	71.0975	6.13195e-06
SiJWB11BBD_pcr_1	-2.81682	-2.11558	-3.27762	-3.69033	-2.97509	0.675008	4	8.81497	0.00307641		SiJWA11BAW_pcr_1	2.93862	2.51965	3.52989	3.63926	3.15685	0.524572	4	12.0359	0.00123409
SiJWC09BAG_pcr_2	-2.5839	-2.72454	-3.33047	-3.25845	-2.97434	0.37523	4	15.8534	0.00054565		SiJWH09BDF_pcr_1	1.87711	1.34977	4.41114	5.03783	3.16896	1.82702	4	3.469	0.0403757
SiJWH10AAY_pcr_2	-2.72144	-3.02616	-3.10865	-3.03763	-2.97347	0.171936	4	34.588	5.31358e-05		SiJWF04BBO_pcr_1	2.42132	2.79865	3.42963	4.02732	3.16923	0.7073	4	8.9615	0.00293221
SiJWG01BCY_pcr_1	-2.18152	-2.57614	-3.81515	-3.3156	-2.9721	0.732694	4	8.11281	0.0039147		SiJWB01CAG_pcr_1	2.48145	2.47577	3.96551	3.75762	3.17009	0.802948	4	7.89612	0.00423356
SiJWH03BBP_pcr_1	-3.07305	-3.12928	-2.94174	-2.74276	-2.97171	0.17167	4	34.621	5.29843e-05		SiJWC04ABC_pcr_2	2.99657	2.92575	3.34513	3.41926	3.17168	0.246661	4	25.7169	0.00012896
SiJWE04CAL_pcr_1	-2.39432	-2.50908	-3.51854	-3.4487	-2.96766	0.598297	4	9.92036	0.00217884		SiJWH06BBV_pcr_1	4.3434	4.03717	1.89788	2.41944	3.17447	1.19866	4	5.29668	0.0131329
SiJWB11CAI_pcr_1	-3.06831	-2.77049	-2.9796	-3.02331	-2.96043	0.131703	4	44.9561	2.42288e-05		SiJWD02BCK_pcr_1	2.2059	2.19735	3.48282	4.81554	3.1754	1.24914	4	5.08414	0.0147033
SiJWC10ADC_pcr_1	-2.52571	-2.5921	-3.28231	-3.42958	-2.95742	0.464871	4	12.7236	0.00104728		SiJWB12BBV_pcr_1	4.23466	4.11136	2.33041	2.02822	3.17616	1.15874	4	5.48208	0.0119375
SiJWC01CAO_pcr_1	-2.07861	-2.31841	-3.57957	-3.82736	-2.95099	0.880217	4	6.70514	0.00676894		SiJWH04AAK_pcr_2	3.64393	3.65149	2.73485	2.69645	3.18168	0.53836	4	11.8199	0.00130182
SiJWA09AAQ_pcr_2	-1.73502	-2.10125	-3.79866	-4.15782	-2.94819	1.2077	4	4.88233	0.0164286		SiJWF01BAJ_pcr_2	2.54538	3.02256	3.54586	3.63532	3.18728	0.506125	4	12.5948	0.00107926
SiJWD02BAR_pcr_1	-2.77119	-2.90466	-3.02607	-3.0904	-2.94808	0.140844	4	41.8631	2.99975e-05		SiJWB10ADW_pcr_1	3.15546	3.34689	3.28814	2.96145	3.18799	0.170937	4	37.3001	4.23857e-05
SiJWG08BDD_pcr_1	-3.01706	-2.50699	-3.07147	-3.19585	-2.94784	0.303279	4	19.4398	0.000297352		SiJWC09AAU_pcr_2	2.8197	2.85469	3.66364	3.45313	3.19779	0.425395	4	15.0344	0.000638756
SiJWH03ADO_pcr_1	-3.21636	-3.18151	-2.82497	-2.53821	-2.94026	0.321128	4	18.3121	0.000355314		SiJWD10BBA_pcr_1	2.67158	2.20398	3.89449	4.03934	3.20235	0.905182	4	7.07559	0.005805
SiJWF08BCX_pcr_1	-1.97212	-1.57548	-4.35479	-3.8573	-2.93992	1.37135	4	4.28764	0.0233182		SiJWD12BDR_pcr_1	2.60379	2.2879	3.92204	4.01261	3.20659	0.88861	4	7.21708	0.00548473
SiJWD01BBI_pcr_1	-1.96864	-1.94966	-4.14637	-3.668	-2.93317	1.14155	4	5.13891	0.0142761		SiJWC12BAI_pcr_2	3.45851	3.52145	2.90886	2.94019	3.20725	0.327726	4	19.5728	0.000291372
SiJWC12BCP_pcr_1	-2.80324	-2.1996	-3.34256	-3.3725	-2.92948	0.552438	4	10.6056	0.00179116		SiJWH01BBA_pcr_1	1.55639	4.05932	3.8364	3.38082	3.20823	1.13685	4	5.64406	0.011007
SiJWD12ABT_pcr_2	-2.98378	-3.36288	-2.55498	-2.80683	-2.92712	0.339635	4	17.2368	0.000425462		SiJWG10ADH_pcr_1	1.78963	2.10572	4.39296	4.54641	3.20868	1.46313	4	4.38604	0.021949
SiJWA08ACD_pcr_2	-3.07079	-2.22981	-3.40091	-2.99947	-2.92525	0.49551	4	11.807	0.00130601		SiJWD06CAP_pcr_1	3.06915	2.97566	3.55754	3.2456	3.21199	0.256119	4	25.082	0.000138965
SiJWD02BBS_pcr_1	-4.99266	-2.87978	-1.98492	-1.83486	-2.92305	1.45481	4	4.01847	0.0276726		SiJWA04ABR_pcr_2	2.90183	2.50289	3.84338	3.60237	3.21262	0.619159	4	10.3774	0.00190932
SiJWE12BDH_pcr_1	-4.43306	-3.79412	-1.30567	-2.15641	-2.92231	1.44252	4	4.05169	0.0270814		SiJWA07BDQ_pcr_1	1.34893	2.55509	4.58338	4.39415	3.22038	1.54709	4	4.16315	0.025213
SiJWG05CAC_pcr_1	-2.79547	-2.5113	-3.17658	-3.20265	-2.9215	0.330785	4	17.664	0.000395562		SiJWB11CAA_pcr_1	3.06269	3.21089	3.2989	3.31846	3.22273	0.116503	4	55.3244	1.3008e-05
SiJWE03BCE_pcr_1	-2.24567	-2.54361	-3.29026	-3.60114	-2.92017	0.631778	4	9.24429	0.00267825		SiJWG05AAO_pcr_2	3.37704	3.38577	3.09946	3.03579	3.22452	0.18305	4	35.2309	5.02852e-05
SiJWG05ABB_pcr_2	-3.48499	-3.48933	-2.60616	-2.09317	-2.91841	0.68932	4	8.4675	0.00345794		SiJWF04ABF_pcr_2	2.42052	2.32192	3.73994	4.42277	3.22629	1.02674	4	6.28456	0.00813603
SiJWB01BAS_pcr_1	-2.92942	-3.11054	-2.82978	-2.79329	-2.91576	0.142029	4	41.0587	3.17928e-05		SiJWE12ACG_pcr_2	2.49704	2.73176	3.64824	4.03042	3.22687	0.730534	4	8.83426	0.0030569
SiJWE01CAK_pcr_1	-2.36506	-2.3395	-3.47894	-3.4795	-2.91575	0.650723	4	8.96157	0.00293214		SiJWB07BDF_pcr_1	2.58567	2.44501	3.82192	4.06042	3.22825	0.830928	4	7.77024	0.00443465
SiJWG06AAB_pcr_2	-2.51236	-2.47982	-3.09916	-3.55237	-2.91093	0.513675	4	11.3337	0.00147337		SiJWH10BCB_pcr_1	2.66022	2.25831	4.00973	3.9867	3.22874	0.903584	4	7.14651	0.00564147
SiJWA07AAC_pcr_1	-2.86867	-3.07003	-2.90209	-2.8003	-2.91027	0.114623	4	50.78	1.68184e-05		SiJWG12ACD_pcr_2	1.92997	2.13146	4.48251	4.3874	3.23283	1.39107	4	4.648	0.0187782
SiJWD11BAB_pcr_1	-1.9288	-2.12334	-3.73726	-3.85167	-2.91027	1.02514	4	5.67782	0.0108252		SiJWF01AAV_pcr_2	3.09255	3.32029	3.24042	3.29107	3.23608	0.101216	4	63.9443	8.42721e-06
SiJWG09AAP_pcr_2	-1.60699	-1.78543	-4.10508	-4.11962	-2.90428	1.39687	4	4.15826	0.0252915		SiJWF05ACR_pcr_2	3.54503	3.89908	2.82269	2.68063	3.23686	0.5815	4	11.1328	0.00155305
SiJWE02ABH_pcr_2	-2.49196	-2.39817	-3.33745	-3.38901	-2.90415	0.531901	4	10.9199	0.00164384		SiJWF07ABE_pcr_2	2.34124	3.08526	3.35278	4.17982	3.23977	0.758877	4	8.53834	0.00337528
SiJWC04BCF_pcr_1	-2.54357	-3.03806	-2.8506	-3.17903	-2.90282	0.274693	4	21.135	0.000231726		SiJWD09ADQ_pcr_1	2.89149	3.34148	3.09332	3.63413	3.24011	0.320732	4	20.2045	0.000265041
SiJWH02BCA_pcr_1	-3.04684	-3.00428	-2.95127	-2.604	-2.9016	0.202217	4	28.6979	9.29018e-05		SiJWA07CAT_pcr_1	3.35712	2.91083	3.39593	3.30144	3.24133	0.22372	4	28.9766	9.02542e-05
SiJWA03AAK_pcr_2	-2.5776	-2.6252	-3.41193	-2.97952	-2.89856	0.38637	4	15.0041	0.0006426		SiJWF05ADG_pcr_1	3.21814	3.27353	3.27067	3.20428	3.24165	0.0356245	4	181.99	3.6583e-07
SiJWF09BCN_pcr_1	-1.87527	-2.91872	-3.41549	-3.37384	-2.89583	0.716613	4	8.08199	0.00395807		SiJWG12BBY_pcr_1	3.76269	2.8423	3.0177	3.36297	3.24642	0.406508	4	15.9722	0.00053368
SiJWG03BAW_pcr_1	-1.4913	-1.76746	-4.27783	-4.04544	-2.89551	1.4694	4	3.94107	0.0291158		SiJWH09CAV_pcr_1	2.46953	2.47059	4.11681	3.93921	3.24904	0.902401	4	7.20087	0.00552022
SiJWD01CAQ_pcr_1	-2.72254	-3.42527	-2.70152	-2.72165	-2.89274	0.355149	4	16.2903	0.000503296		SiJWD04BDZ_pcr_1	1.58422	3.68812	3.57805	4.15188	3.25057	1.13839	4	5.71083	0.0106512
SiJWC02BDP_pcr_1	-1.93803	-2.07474	-3.76183	-3.79489	-2.89237	1.02466	4	5.64552	0.0109991		SiJWH11BDE_pcr_1	3.24885	3.20537	3.14482	3.41149	3.25263	0.114172	4	56.9777	1.1909e-05
SiJWF11BBI_pcr_1	-2.74359	-3.22293	-2.79286	-2.80535	-2.89118	0.222766	4	25.9571	0.000125425		SiJWD05BCX_pcr_1	3.48263	3.54856	2.87107	3.11578	3.25451	0.318739	4	20.4211	0.00025674
SiJWG03BDH_pcr_1	-2.58781	-2.86825	-3.15933	-2.93331	-2.88717	0.235355	4	24.5346	0.000148437		SiJWC06BCW_pcr_1	2.23739	3.02875	4.00936	3.74776	3.25582	0.795528	4	8.18529	0.00381515
SiJWD03ACA_pcr_2	-2.62035	-2.46743	-3.30679	-3.13952	-2.88352	0.402939	4	14.3124	0.000739179		SiJWE05ABA_pcr_2	2.02918	2.54522	3.82383	4.63439	3.25816	1.18781	4	5.486	0.0119137
SiJWF10ACH_pcr_2	-2.2092	-2.19176	-3.35178	-3.7791	-2.88296	0.807172	4	7.14336	0.00564862		SiJWD05BBB_pcr_1	3.07251	2.90145	3.46435	3.59686	3.25879	0.326056	4	19.9891	0.000273646
SiJWH10BCS_pcr_1	-2.64887	-2.55888	-2.92684	-3.39259	-2.88179	0.374819	4	15.377	0.000597424		SiJWG10BDX_pcr_1	1.83414	2.43163	4.36145	4.42376	3.26275	1.3275	4	4.91563	0.0161264
SiJWH06CAS_pcr_1	-1.93998	-1.7563	-3.88458	-3.94587	-2.88168	1.19604	4	4.81869	0.017027		SiJWA11ADS_pcr_1	2.37249	2.37613	3.95456	4.3508	3.26349	1.03941	4	6.27952	0.00815453
SiJWH03BCW_pcr_1	-3.24693	-2.54242	-3.09239	-2.64231	-2.88102	0.341664	4	16.8646	0.000454018		SiJWB12BBC_pcr_1	3.21994	3.22536	3.09673	3.53868	3.27018	0.1886	4	34.6785	5.2722e-05
SiJWH09ACJ_pcr_2	-2.36692	-2.65644	-3.38962	-3.11091	-2.88098	0.456895	4	12.6111	0.00107515		SiJWG06AAV_pcr_2	3.3758	3.52621	3.16631	3.01459	3.27073	0.2257	4	28.983	9.01952e-05
SiJWH04AAP_pcr_2	-2.36873	-2.45013	-3.30894	-3.38522	-2.87825	0.543263	4	10.5962	0.00179586		SiJWG06BBZ_pcr_1	4.40678	1.78103	3.55276	3.34945	3.2725	1.09477	4	5.97845	0.00936706
SiJWG10BCK_pcr_1	-3.70516	-3.55547	-1.87906	-2.36493	-2.87616	0.895222	4	6.42557	0.00764024		SiJWH12AAW_pcr_2	2.81756	3.25474	3.22419	3.7954	3.27297	0.401265	4	16.3133	0.000501193
SiJWH02AAX_pcr_2	-2.73143	-2.32307	-3.17852	-3.26378	-2.8742	0.435319	4	13.205	0.000938339		SiJWE04ABW_pcr_2	1.98043	2.27368	4.30367	4.53725	3.27376	1.33292	4	4.91217	0.0161575
SiJWG04CAN_pcr_1	-2.04448	-2.60703	-3.43017	-3.38096	-2.86566	0.66469	4	8.62255	0.00328039		SiJWG06BDV_pcr_1	2.27759	2.44272	3.99238	4.38889	3.27539	1.07128	4	6.11494	0.00878995
SiJWD08ADI_pcr_1	-2.31295	-2.24001	-3.44189	-3.46505	-2.86498	0.680253	4	8.42327	0.00351092		SiJWH11ADU_pcr_1	2.13789	2.08921	4.39689	4.52661	3.28765	1.35691	4	4.84578	0.0167689
SiJWB05BAQ_pcr_1	-1.7896	-1.89189	-3.44873	-4.31278	-2.86075	1.2302	4	4.65088	0.0187467		SiJWB12ACY_pcr_1	2.89681	3.18611	3.52277	3.54731	3.28825	0.308636	4	21.3083	0.000226148
SiJWF04BAS_pcr_1	-2.20506	-2.05781	-3.87196	-3.30781	-2.86066	0.875036	4	6.53838	0.00727187		SiJWB03ACF_pcr_2	2.42949	3.43604	3.32657	3.96658	3.28967	0.637937	4	10.3135	0.00194424
SiJWB12AAS_pcr_2	-2.83977	-2.87084	-2.58128	-3.14944	-2.86033	0.232372	4	24.6186	0.000146929		SiJWD06ADK_pcr_1	3.13777	3.52952	3.18047	3.31105	3.2897	0.176052	4	37.3719	4.21421e-05
SiJWH04ACW_pcr_2	-1.86968	-2.04391	-3.8298	-3.69557	-2.85974	1.04649	4	5.46539	0.0120391		SiJWB02AAC_pcr_2	3.0928	3.54702	3.01112	3.52239	3.29333	0.280882	4	23.4499	0.000169907
SiJWD01BAC_pcr_1	-3.27767	-3.26248	-2.53733	-2.35805	-2.85888	0.480453	4	11.9008	0.00127589		SiJWH04BCG_pcr_1	2.04834	2.16275	4.09292	4.89375	3.29944	1.4176	4	4.65497	0.0187022
SiJWC05ABV_pcr_2	-2.64024	-2.68383	-3.07803	-3.02498	-2.85677	0.226599	4	25.2143	0.000136797		SiJWG12ABP_pcr_2	4.32017	3.62941	2.773	2.47578	3.29959	0.83792	4	7.87566	0.0042654
SiJWE01ADR_pcr_1	-2.35129	-2.35849	-2.99781	-3.71948	-2.85677	0.650116	4	8.78848	0.00310348		SiJWD09BDA_pcr_1	1.92024	1.67644	4.39351	5.23651	3.30668	1.77814	4	3.71926	0.0338245
SiJWH01ADK_pcr_1	-2.77662	-2.67853	-2.98501	-2.98595	-2.85653	0.154191	4	37.0518	4.3242e-05		SiJWC10ABT_pcr_2	3.54592	3.65631	3.02397	3.01366	3.30996	0.339227	4	19.5148	0.000293962
SiJWH09BBH_pcr_1	-3.75665	-3.63672	-2.04607	-1.98172	-2.85529	0.973148	4	5.86815	0.00987031		SiJWD05BAW_pcr_1	2.11054	2.49932	4.10899	4.52259	3.31036	1.18387	4	5.59242	0.011293
SiJWE03ABR_pcr_2	-3.2262	-3.39225	-2.57745	-2.20972	-2.85141	0.553714	4	10.2992	0.00195215		SiJWE10AAN_pcr_2	2.0049	1.59773	4.50811	5.13559	3.31158	1.77044	4	3.74097	0.0333223
SiJWF09BCI_pcr_1	-1.0581	-0.809869	-3.99815	-5.49055	-2.83917	2.28497	4	2.48508	0.0888699		SiJWE01ADI_pcr_1	2.65359	3.44006	3.40492	3.7549	3.31337	0.467153	4	14.1854	0.000758986
SiJWE03BAU_pcr_1	-2.52272	-2.88965	-2.89076	-3.03621	-2.83483	0.219164	4	25.8696	0.000126699		SiJWB03BAU_pcr_1	1.83302	2.68127	4.28518	4.4568	3.31407	1.27054	4	5.21679	0.0136962
SiJWE12BCH_pcr_1	-2.32122	-2.92277	-3.11845	-2.95922	-2.83042	0.349935	4	16.1768	0.000513865		SiJWA02BDK_pcr_1	3.05366	2.84639	3.76573	3.59346	3.31481	0.435352	4	15.2282	0.000614928
SiJWF06ADB_pcr_1	-3.67024	-3.02001	-2.59104	-2.01477	-2.82401	0.69849	4	8.08605	0.00395232		SiJWD11BBP_pcr_1	1.68599	2.2988	3.95247	5.33	3.31682	1.64853	4	4.02398	0.0275734
SiJWG10BAO_pcr_1	-2.64509	-2.47534	-3.09587	-3.07909	-2.82385	0.312281	4	18.0853	0.000368752		SiJWE07BDC_pcr_1	2.81313	2.52145	3.97777	3.96873	3.32027	0.763348	4	8.69922	0.00319702
SiJWD03ABZ_pcr_2	-1.40885	-1.39485	-3.87856	-4.61255	-2.8237	1.66894	4	3.38382	0.04297		SiJWD02ADA_pcr_1	2.80166	3.08362	3.70595	3.69614	3.32184	0.452759	4	14.6738	0.000686484
SiJWC05ACG_pcr_2	-2.53013	-2.66893	-3.10863	-2.95576	-2.81586	0.26364	4	21.3615	0.000224472		SiJWG12AAV_pcr_2	2.92787	2.95517	3.61685	3.78906	3.32224	0.44534	4	14.92	0.000653406
SiJWG02CAJ_pcr_1	-2.26582	-2.23827	-3.37091	-3.38428	-2.81482	0.649955	4	8.66158	0.0032376		SiJWF11BAO_pcr_1	3.12756	3.33546	3.43896	3.4048	3.3267	0.139564	4	47.6726	2.03225e-05
SiJWD08ACO_pcr_2	-2.0505	-2.04682	-3.51574	-3.64288	-2.81398	0.885245	4	6.35753	0.00787437		SiJWA10BBJ_pcr_1	2.09457	2.71371	4.359	4.14856	3.32896	1.10075	4	6.04852	0.00906477
SiJWB10BDT_pcr_1	-3.1872	-3.18984	-2.52499	-2.34645	-2.81212	0.440699	4	12.7621	0.00103798		SiJWH01AAR_pcr_2	3.55484	3.3695	3.23092	3.16615	3.33036	0.172024	4	38.7197	3.78995e-05
SiJWA09ABL_pcr_2	-2.73516	-2.65786	-2.99624	-2.85553	-2.8112	0.147764	4	38.0497	3.99336e-05		SiJWB11BCT_pcr_1	2.82418	3.3248	3.48161	3.69415	3.33119	0.370344	4	17.9897	0.000374619
SiJWH04ADP_pcr_1	-2.44369	-2.29242	-3.73544	-2.74995	-2.80538	0.648594	4	8.65064	0.00324951		SiJWF02AAH_pcr_2	2.86476	2.72455	3.91742	3.8185	3.33131	0.623619	4	10.6838	0.00175293
SiJWH10ACX_pcr_1	-1.99573	-2.0596	-3.56178	-3.60174	-2.80471	0.897784	4	6.24808	0.00827111		SiJWE05BBK_pcr_1	1.41959	2.79284	4.44703	4.68832	3.33695	1.53088	4	4.35951	0.0223077
SiJWD10ABR_pcr_2	-2.10921	-1.97976	-3.17059	-3.95895	-2.80462	0.936377	4	5.99038	0.0093147		SiJWG12BAI_pcr_2	2.29757	2.7196	4.01886	4.3381	3.34353	0.988022	4	6.76814	0.00659088
SiJWB04BBR_pcr_1	-1.73023	-1.81886	-4.00199	-3.66659	-2.80442	1.1976	4	4.6834	0.0183964		SiJWD04AAQ_pcr_2	2.69624	2.64637	3.96145	4.10431	3.35209	0.788527	4	8.50216	0.00341717
SiJWG10BDR_pcr_1	-2.35357	-2.71684	-3.21676	-2.9213	-2.80212	0.362678	4	15.4524	0.000588809		SiJWA09BCV_pcr_1	2.49075	2.37559	4.29989	4.25166	3.35447	1.06505	4	6.29919	0.00808267
SiJWB07ACA_pcr_2	-2.33925	-2.41622	-3.28466	-3.16549	-2.8014	0.492631	4	11.3732	0.00145835		SiJWA10BDX_pcr_1	2.19375	2.91156	4.0793	4.2369	3.35538	0.974251	4	6.88812	0.00626844
SiJWB02BDD_pcr_1	-3.3505	-3.27875	-2.28325	-2.28674	-2.79981	0.595178	4	9.4083	0.00254419		SiJWG03ACC_pcr_2	2.77034	2.27024	4.1987	4.18234	3.35541	0.985709	4	6.80811	0.00648109
SiJWD01BCB_pcr_1	-2.29781	-2.0884	-3.46334	-3.33957	-2.79728	0.704673	4	7.93923	0.00416746		SiJWE06BAU_pcr_1	1.665	1.83137	4.65957	5.27151	3.35686	1.8755	4	3.5797	0.0372942
SiJWA07AAC_pcr_2	-2.58068	-3.0486	-2.78083	-2.77753	-2.79691	0.192124	4	29.1157	8.89704e-05		SiJWC03ACD_pcr_2	1.78853	1.54928	5.00843	5.08569	3.35798	1.95307	4	3.43866	0.0412762
SiJWG12CAR_pcr_1	-3.05541	-2.50507	-2.75731	-2.86223	-2.795	0.229358	4	24.3725	0.000151407		SiJWF09BBF_pcr_1	2.57746	3.28077	3.53619	4.04854	3.36074	0.612041	4	10.9821	0.00161661
SiJWC05CAA_pcr_1	-3.21302	-3.54006	-2.21325	-2.21264	-2.79474	0.684941	4	8.16054	0.00384876		SiJWD08ACZ_pcr_1	3.56335	3.59528	3.12991	3.15522	3.36094	0.252709	4	26.5993	0.000116588
SiJWF08AAN_pcr_2	-1.73004	-2.31637	-3.38406	-3.74713	-2.7944	0.933946	4	5.98407	0.00934234		SiJWD08BDH_pcr_1	2.49556	2.48699	4.22962	4.24497	3.36429	1.00809	4	6.67458	0.00685761
SiHNC09w01me_pcr_1	-1.87125	-1.62794	-4.40639	-3.26784	-2.79336	1.29557	4	4.31216	0.0229668		SiJWC09BCN_pcr_1	1.90923	2.39698	4.62067	4.54581	3.36817	1.41743	4	4.75251	0.0176797
SiJWF07AAQ_pcr_2	-1.91958	-1.62325	-3.64876	-3.97999	-2.79289	1.19338	4	4.68065	0.0184258		SiJWB08BBP_pcr_1	3.05766	3.00498	3.47448	3.93998	3.36927	0.434583	4	15.5058	0.000582808
SiJWF08AAX_pcr_1	-1.85874	-2.72929	-3.54125	-3.02085	-2.78753	0.704409	4	7.91452	0.00420517		SiJWA12BDQ_pcr_1	2.90738	2.96919	3.74085	3.87542	3.37321	0.505833	4	13.3373	0.000911068
SiJWB11AAK_pcr_2	-2.81419	-2.89423	-2.66609	-2.76507	-2.78489	0.0954276	4	58.3666	1.10795e-05		SiJWB03CAK_pcr_1	2.62676	2.41741	4.34828	4.10822	3.37517	0.993601	4	6.79381	0.00652008
SiJWE12CAA_pcr_1	-3.35423	-3.35324	-2.34885	-2.07221	-2.78213	0.669623	4	8.30955	0.00365213		SiJWC02BBA_pcr_1	3.2772	2.98368	3.42422	3.82506	3.37754	0.350068	4	19.2965	0.000303985
SiJWG06BBA_pcr_1	-3.19093	-3.33167	-2.40533	-2.1994	-2.78183	0.562931	4	9.88338	0.0022028		SiJWB07BBA_pcr_1	1.83725	3.06516	4.28564	4.33273	3.38019	1.18421	4	5.70876	0.010662
SiJWH01BDB_pcr_1	-1.82173	-2.06456	-3.87578	-3.3587	-2.78019	0.994279	4	5.59237	0.0112933		SiJWA01BAC_pcr_1	1.85983	1.67357	4.65024	5.34215	3.38145	1.88736	4	3.58327	0.0372001
SiJWF09CAB_pcr_1	-2.76339	-3.0853	-2.61373	-2.65416	-2.77914	0.213667	4	26.0137	0.000124611		SiJWD12AAN_pcr_2	2.12603	2.27992	4.5919	4.53776	3.3839	1.36524	4	4.95721	0.0157591
SiJWE04BDT_pcr_1	-2.46658	-2.26936	-3.15554	-3.20671	-2.77455	0.47679	4	11.6385	0.00136258		SiJWH10BDY_pcr_1	2.28581	2.64381	4.28201	4.32777	3.38485	1.07254	4	6.31183	0.00803692
SiJWB01BCN_pcr_1	-2.41247	-2.94242	-2.42875	-3.30041	-2.77101	0.430251	4	12.8809	0.00100992		SiJWG10ACJ_pcr_2	2.09014	2.2642	4.55519	4.63717	3.38667	1.39882	4	4.84218	0.0168029
SiJWC07BAR_pcr_1	-1.71552	-1.78716	-3.74197	-3.83867	-2.77083	1.17823	4	4.70338	0.0181854		SiJWF03ADI_pcr_1	3.01196	3.15863	3.57523	3.8066	3.38811	0.367105	4	18.4585	0.000346986
SiJWF05ABX_pcr_2	-2.16025	-2.12379	-3.35808	-3.43918	-2.77032	0.726411	4	7.62743	0.00467837		SiJWH01ADD_pcr_1	3.75356	3.72471	3.16168	2.9319	3.39297	0.410754	4	16.5207	0.000482713
SiJWA08BDL_pcr_1	-2.47148	-2.79084	-2.87296	-2.94326	-2.76964	0.208302	4	26.5925	0.000116678		SiJWE03BCU_pcr_1	3.83495	3.63063	3.16406	2.97591	3.40139	0.399116	4	17.0446	0.000439901
SiJWG08CAL_pcr_1	-2.75428	-2.96629	-2.4581	-2.88412	-2.7657	0.222867	4	24.8192	0.000143409		SiJWG03BCU_pcr_1	3.02362	2.50547	3.79195	4.28997	3.40275	0.793194	4	8.57988	0.00332803
SiJWE08ACH_pcr_2	-2.92133	-2.73751	-2.75036	-2.63457	-2.76094	0.118818	4	46.4737	2.19344e-05		SiJWE01ACI_pcr_2	2.3172	2.49405	4.18538	4.61527	3.40297	1.16717	4	5.83114	0.010047
SiJWF01BAR_pcr_1	-3.41453	-2.41227	-2.20273	-3.01145	-2.76024	0.554709	4	9.95205	0.00215858		SiJWG11ACZ_pcr_1	2.75473	2.86276	3.99691	4.00857	3.40574	0.690777	4	9.86061	0.00221773
SiJWF08ADI_pcr_1	-2.50773	-2.44383	-3.09231	-2.9888	-2.75817	0.329834	4	16.7246	0.000465417		SiJWC09ABG_pcr_2	2.59628	2.48657	4.33727	4.21444	3.40864	1.00363	4	6.79262	0.00652333
SiJWE08BAI_pcr_2	-2.71249	-3.2156	-2.45476	-2.64874	-2.7579	0.324227	4	17.0122	0.000442402		SiJWE05BCW_pcr_1	2.512	2.72367	4.16583	4.25766	3.41479	0.925053	4	7.3829	0.00513836
SiJWB01ADK_pcr_1	-2.09011	-2.50945	-3.2437	-3.17725	-2.75512	0.553622	4	9.95308	0.00215793		SiJWD03AAN_pcr_2	1.46095	1.6045	4.96307	5.63331	3.41546	2.19193	4	3.11639	0.052619
SiJWG04AAQ_pcr_2	-1.93306	-1.58429	-3.86341	-3.6323	-2.75327	1.16109	4	4.74256	0.0177807		SiJWD06BAW_pcr_1	3.62483	3.62745	3.20385	3.24613	3.42557	0.232246	4	29.4994	8.55533e-05
SiJWD02BAP_pcr_1	-2.40059	-2.30627	-3.157	-3.14308	-2.75174	0.461567	4	11.9235	0.00126875		SiJWD12ACY_pcr_1	1.96598	2.19785	4.67213	4.87048	3.42661	1.55771	4	4.39955	0.0217691
SiJWB01ADP_pcr_1	-3.60423	-2.87996	-2.62447	-1.89777	-2.75161	0.704426	4	7.81235	0.00436601		SiJWG01BAL_pcr_1	3.57713	3.39704	3.394	3.33978	3.42699	0.103494	4	66.2259	7.58631e-06
SiJWE04AAP_pcr_2	-2.28762	-2.50284	-3.09481	-3.09873	-2.746	0.414456	4	13.2511	0.000928717		SiJWE10ACU_pcr_2	3.9011	3.80128	2.95541	3.07077	3.43214	0.487869	4	14.0699	0.000777597
SiJWD07BAE_pcr_1	-1.83131	-1.97239	-3.41241	-3.76334	-2.74486	0.9856	4	5.56994	0.0114206		SiJWH06BDV_pcr_1	2.7549	2.9043	3.93813	4.14296	3.43507	0.706759	4	9.72063	0.00231251
SiJWH07CAM_pcr_1	-2.41584	-2.8815	-2.74331	-2.93666	-2.74433	0.233608	4	23.4951	0.000168932		SiJWA11ACN_pcr_2	1.71418	1.71276	4.7556	5.61389	3.44911	2.03454	4	3.39055	0.0427575
SiJWE12BBI_pcr_1	-4.14064	-4.64514	0.721584	-2.91285	-2.74426	2.42238	4	2.26576	0.108348		SiJWB08BBE_pcr_1	2.7155	3.44919	3.71636	3.93759	3.45466	0.531696	4	12.9949	0.000983952
SiJWD02AAP_pcr_2	-2.8385	-2.90455	-2.63629	-2.59769	-2.74426	0.15024	4	36.5316	4.51121e-05		SiJWE10BCB_pcr_1	3.44563	3.47173	3.51125	3.40069	3.45733	0.0464019	4	149.016	6.66343e-07
SiJWA02ADK_pcr_1	-2.27504	-2.34662	-3.37968	-2.97349	-2.74371	0.527444	4	10.4038	0.00189512		SiJWA04AAE_pcr_2	2.54442	2.46747	4.34922	4.47124	3.45809	1.10102	4	6.28163	0.00814676
SiJWB03BEA_pcr_1	-2.68354	-2.6067	-2.64922	-3.02402	-2.74087	0.191366	4	28.6454	9.34125e-05		SiJWG10BDS_pcr_1	2.16055	2.46709	4.53088	4.77025	3.48219	1.35843	4	5.12679	0.0143692
SiJWD07BAM_pcr_1	-2.19323	-2.2818	-3.20619	-3.28116	-2.74059	0.582835	4	9.40435	0.00254732		SiJWA03BCZ_pcr_1	3.37484	3.47821	3.64574	3.45849	3.48932	0.113497	4	61.4874	9.47761e-06
SiJWC10ACM_pcr_2	-2.29291	-2.57757	-3.09418	-2.98735	-2.738	0.370986	4	14.7607	0.000674561		SiJWF05BBP_pcr_1	2.52153	2.57038	4.18666	4.68726	3.49146	1.11091	4	6.28574	0.00813169
SiJWG08BBT_pcr_1	-1.92268	-2.41609	-3.35336	-3.25873	-2.73771	0.687557	4	7.96359	0.0041307		SiJWE05ADG_pcr_1	3.50953	3.56199	3.71984	3.22435	3.50393	0.206705	4	33.9027	5.64171e-05
SiJWB01ABM_pcr_2	-2.69271	-2.28142	-2.88481	-3.08816	-2.73677	0.343837	4	15.919	0.000538998		SiJWE01ABZ_pcr_2	4.07128	3.7536	3.06701	3.13638	3.50707	0.486544	4	14.4162	0.000723505
SiJWG02ADN_pcr_1	-3.18917	-3.56932	-2.12274	-2.04815	-2.73235	0.763535	4	7.15709	0.0056176		SiJWA03BCA_pcr_1	3.48105	3.42547	3.7875	3.35041	3.51111	0.191881	4	36.5968	4.48721e-05
SiJWH09BBV_pcr_1	-2.66307	-2.84706	-2.51081	-2.90642	-2.73184	0.180127	4	30.3323	7.87151e-05		SiJWF05ACI_pcr_2	2.94602	3.2018	3.8954	4.01266	3.51397	0.520959	4	13.4904	0.00088079
SiJWA09BDE_pcr_1	-2.29368	-2.70445	-3.11566	-2.80497	-2.72969	0.339301	4	16.0901	0.000522143		SiJWD01ACU_pcr_2	2.95158	3.42	3.78725	3.90873	3.51689	0.430348	4	16.3444	0.000498357
SiJWB08BDH_pcr_1	-1.49705	-1.8942	-3.74379	-3.77355	-2.72715	1.20214	4	4.53714	0.0200424		SiJWG03AAZ_pcr_1	3.94939	3.82843	3.19522	3.1036	3.51916	0.431421	4	16.3143	0.000501102
SiJWB10BBW_pcr_1	-2.00302	-2.45075	-3.39548	-3.04212	-2.72284	0.618208	4	8.80882	0.00308267		SiJWG04BDZ_pcr_1	2.64172	2.26784	4.48405	4.69122	3.52121	1.24371	4	5.66244	0.0109076
SiJWA12ADE_pcr_1	-2.11932	-2.151	-3.35743	-3.25919	-2.72174	0.678629	4	8.02128	0.00404538		SiJWF09BBO_pcr_1	3.31036	3.28279	3.73744	3.7609	3.52287	0.261723	4	26.9206	0.000112477
SiJWD08ABP_pcr_2	-1.54229	-1.63214	-3.78954	-3.91778	-2.72044	1.3101	4	4.15304	0.0253756		SiJWD06BBA_pcr_1	2.78259	2.74409	4.31319	4.27363	3.52838	0.883674	4	7.98569	0.00409773
SiJWF09BDK_pcr_1	-2.16721	-2.23266	-3.26103	-3.22071	-2.7204	0.601801	4	9.04088	0.00285782		SiJWB08ACU_pcr_2	3.21211	3.33267	3.65321	3.92089	3.52972	0.320396	4	22.0335	0.000204649
SiJWC07BAH_pcr_2	-2.83731	-2.90123	-2.44766	-2.69097	-2.71929	0.201343	4	27.0116	0.000111348		SiJWE06AAP_pcr_2	1.8992	2.98276	4.56407	4.68691	3.53323	1.33749	4	5.28336	0.0132247
SiJWC12AAY_pcr_1	-2.95605	-3.49096	-2.08513	-2.30405	-2.70905	0.639193	4	8.47646	0.00344734		SiJWD05BDM_pcr_1	3.36275	3.62501	3.49626	3.6528	3.53421	0.133103	4	53.1047	1.47068e-05
SiJWA11ACE_pcr_2	-2.1405	-2.19781	-3.149	-3.34688	-2.70855	0.628489	4	8.61923	0.00328405		SiJWD04BAY_pcr_1	3.12129	3.04679	3.83937	4.14756	3.53875	0.54078	4	13.0876	0.00096347
SiJWD03BCS_pcr_1	-3.58855	-3.48238	-1.89785	-1.84872	-2.70438	0.960848	4	5.62914	0.0110887		SiJWC09BCA_pcr_1	3.66076	3.66854	3.49394	3.38104	3.55107	0.13905	4	51.0762	1.65278e-05
SiJWD11BAI_pcr_2	-2.70104	-2.92698	-2.60031	-2.58382	-2.70304	0.15803	4	34.2093	5.49167e-05		SiJWG03BDE_pcr_1	2.6423	3.58537	3.77712	4.21004	3.55371	0.661404	4	10.746	0.00172329
SiJWE02CAR_pcr_1	-1.93227	-2.38367	-3.05778	-3.42789	-2.7004	0.670151	4	8.05908	0.00399071		SiJWE09BAI_pcr_2	3.27869	3.52196	3.71779	3.69994	3.55459	0.20408	4	34.8353	5.20147e-05
SiJWG05BDP_pcr_1	-2.18647	-1.9046	-3.32253	-3.38362	-2.69931	0.764033	4	7.06594	0.00582774		SiJWA07ACH_pcr_2	2.8901	2.97701	4.24763	4.10593	3.55517	0.720977	4	9.86209	0.00221676
SiJWD04ACA_pcr_2	-2.70697	-3.03986	-2.65629	-2.39111	-2.69855	0.266376	4	20.2613	0.000262831		SiJWD12ACX_pcr_1	2.72798	3.15583	3.95625	4.41356	3.56341	0.761826	4	9.3549	0.00258684
SiJWG04ABK_pcr_2	-2.60055	-2.66239	-2.71477	-2.81436	-2.69802	0.0905279	4	59.6064	1.04029e-05		SiJWA11CAR_pcr_1	3.12852	2.77725	4.1002	4.24999	3.56399	0.722662	4	9.86351	0.00221582
SiJWC10BDJ_pcr_1	-1.68856	-2.01019	-3.20392	-3.87809	-2.69519	1.02316	4	5.26835	0.0133291		SiJWE02BBT_pcr_1	1.62383	3.17879	4.39768	5.05921	3.56488	1.51034	4	4.72065	0.0180056
SiJWE04BCC_pcr_1	-2.1338	-2.20197	-3.28531	-3.15086	-2.69299	0.609451	4	8.83742	0.00305372		SiJWB12BCI_pcr_1	3.16409	3.66335	3.84225	3.61444	3.57103	0.288423	4	24.7625	0.000144393
SiJWG05BAR_pcr_1	-2.84094	-3.32164	-2.35322	-2.24279	-2.68965	0.495032	4	10.8666	0.00166767		SiJWF12BAD_pcr_1	3.84417	3.71808	3.31861	3.42523	3.57652	0.245684	4	29.1149	8.89785e-05
SiJWE08CAG_pcr_1	-2.27584	-2.39681	-3.02032	-3.06397	-2.68923	0.410876	4	13.0903	0.000962891		SiJWH03ACF_pcr_2	3.63832	3.47199	3.76056	3.44046	3.57783	0.149575	4	47.8398	2.01103e-05
SiJWC01ABK_pcr_2	-2.49806	-2.44862	-2.88892	-2.91713	-2.68818	0.249166	4	21.5774	0.000217833		SiJWF06BBY_pcr_1	2.3098	3.83182	3.46703	4.70418	3.57821	0.992198	4	7.21269	0.00549432
SiJWD11ACO_pcr_2	-2.21394	-2.19453	-3.0175	-3.3217	-2.68692	0.571079	4	9.40997	0.00254287		SiJWD01BBF_pcr_1	3.21618	3.18718	3.96621	4.00149	3.59276	0.451971	4	15.8982	0.000541096
SiJWH11ABO_pcr_2	-2.14427	-1.844	-3.26267	-3.49151	-2.68561	0.813188	4	6.60514	0.00706481		SiJWB03ADS_pcr_1	2.93281	2.75556	4.1603	4.52318	3.59296	0.880192	4	8.16404	0.00384398
SiJWD05AA1_pcr_1	-2.18677	-2.60111	-2.92563	-3.02885	-2.68559	0.379212	4	14.1641	0.000762373		SiJWE08ACL_pcr_2	4.08986	3.71065	3.31898	3.26044	3.59498	0.385735	4	18.6396	0.000337037
SiJWE11CAK_pcr_1	-1.294	-1.21767	-4.35202	-3.86461	-2.68208	1.65915	4	3.23307	0.0481036		SiJWH09ADX_pcr_1	2.78065	2.8502	4.38198	4.40063	3.60336	0.910311	4	7.91677	0.00420172
SiJWH03AEA_pcr_1	-2.54547	-3.02539	-2.29242	-2.84943	-2.67818	0.324708	4	16.4959	0.000484872		SiJWD12BCY_pcr_1	2.88642	2.92793	4.22571	4.38229	3.60559	0.809164	4	8.91188	0.00298002
SiJWD08CAN_pcr_1	-2.57777	-2.6182	-2.46702	-3.03587	-2.67472	0.249107	4	21.4745	0.000220965		SiJWA04AAN_pcr_2	5.30854	5.48246	1.71188	1.92501	3.60697	2.06827	4	3.48792	0.0398267
SiJWE08CAG_pcr_1	-2.56045	-2.42183	-3.07628	-2.6305	-2.67226	0.28296	4	18.8879	0.000324006		SiJWH07BAA_pcr_2	3.99882	3.22323	3.53084	3.67983	3.60818	0.32244	4	22.3804	0.000195322
SiJWC03BAA_pcr_2	-2.42101	-2.64557	-2.74278	-2.85873	-2.66702	0.185718	4	28.7212	9.26765e-05		SiJWA03AAG_pcr_2	3.27493	3.36374	3.85498	3.94263	3.60907	0.338414	4	21.3293	0.000225484
SiJWA05AAH_pcr_2	-2.04727	-2.18887	-3.09704	-3.33463	-2.66695	0.643774	4	8.28536	0.00368313		SiJWG09BCP_pcr_1	3.40533	3.64876	3.795	3.59103	3.61003	0.161224	4	44.7828	2.45108e-05
SiJWE07ABB_pcr_2	-2.12798	-1.88715	-3.26207	-3.36985	-2.66176	0.763045	4	6.97669	0.00604366		SiJWA02CAW_pcr_1	2.96277	2.84568	4.35969	4.297	3.61629	0.824002	4	8.77737	0.00311492
SiJWB05BCV_pcr_1	-2.4751	-2.89788	-2.75416	-2.51798	-2.66128	0.19984	4	26.6341	0.000116134		SiJWB06BAU_pcr_1	2.47768	2.35445	4.80413	4.82938	3.61641	1.38699	4	5.21476	0.0137109
SiJWE01BCZ_pcr_1	-2.8803	-2.61787	-3.02447	-2.11568	-2.65958	0.399762	4	13.3058	0.000917455		SiJWB02AAC_pcr_1	3.86482	4.05195	3.49018	3.0752	3.62054	0.432116	4	16.7572	0.000462726
SiJWF10BDY_pcr_1	-2.2055	-2.14132	-3.13503	-3.15283	-2.65867	0.560991	4	9.47848	0.00248955		SiJWF04ADF_pcr_1	3.28783	3.186	3.96828	4.04344	3.62139	0.446946	4	16.2051	0.000511208
SiJWG01BBP_pcr_1	-3.76178	-2.54312	-2.42759	-1.89492	-2.65685	0.788862	4	6.73591	0.00668118		SiJWD04BCH_pcr_1	3.80287	3.8455	3.30998	3.55075	3.62727	0.24832	4	29.2145	8.80734e-05
SiJWG04BCB_pcr_1	-2.1592	-2.44487	-2.95517	-3.06195	-2.6553	0.426491	4	12.4519	0.00111629		SiJWG06ACV_pcr_2	3.41025	3.7972	3.50418	3.81088	3.63063	0.203953	4	35.6025	4.873e-05
SiJWA08ACM_pcr_2	-1.25336	-1.19565	-4.1029	-4.06401	-2.65398	1.65086	4	3.21527	0.0487599		SiJWH08CAG_pcr_1	1.37575	1.41327	5.87596	5.85761	3.63065	2.58213	4	2.81214	0.0671737
SiJWD07BBF_pcr_1	-2.30306	-2.37615	-2.95057	-2.98543	-2.6538	0.364304	4	14.5692	0.000701212		SiJWF10AAG_pcr_2	-0.353213	-0.386992	7.27217	7.99416	3.63153	4.6301	4	1.56866	0.214734
SiJWB04ABT_pcr_2	-2.42479	-2.34753	-3.19429	-2.64359	-2.65255	0.382304	4	13.8766	0.000810134		SiJWA07BCR_pcr_1	3.47313	3.69643	3.54678	3.85795	3.64357	0.170459	4	42.7501	2.81712e-05
SiJWH06ABK_pcr_2	-3.00445	-3.38814	-2.13818	-2.07299	-2.65094	0.649459	4	8.16354	0.00384467		SiJWE01BCN_pcr_1	3.52915	3.37498	3.78374	3.89942	3.64682	0.238256	4	30.6126	7.65778e-05
SiJWC09AAA_pcr_1	-1.90311	-2.11708	-3.23824	-3.34462	-2.65076	0.746183	4	7.10485	0.00573679		SiJWB11ACU_pcr_2	2.89293	2.94821	4.29486	4.45778	3.64844	0.84341	4	8.65165	0.00324841
SiJWB03ADM_pcr_1	-1.07242	-0.714433	-4.71534	-4.08289	-2.64627	2.04564	4	2.58723	0.0812689		SiJWB08BCD_pcr_1	3.79691	3.51075	3.69199	3.60097	3.65016	0.122665	4	59.5141	1.04513e-05
SiJWF06ACZ_pcr_1	-2.77391	-1.95117	-3.02163	-2.8369	-2.6459	0.474935	4	11.1422	0.00154921		SiJWH02ABR_pcr_2	2.8805	2.83382	4.13814	4.74836	3.6502	0.949204	4	7.69108	0.00456762
SiJWF06BCP_pcr_1	-2.2061	-2.23387	-2.51505	-3.6206	-2.64391	0.66592	4	7.94062	0.00416535		SiJWD01BDA_pcr_1	2.8929	2.58468	4.61958	4.53686	3.65851	1.06996	4	6.83861	0.00639892
SiJWF06ADM_pcr_1	-1.97024	-2.43184	-3.01157	-3.16043	-2.64352	0.547957	4	9.64864	0.00236335		SiJWC10ABG_pcr_2	3.23001	3.40471	3.89315	4.11058	3.65961	0.411277	4	17.7963	0.000386869
SiJWA11AAV_pcr_2	-2.63465	-2.80924	-2.84215	-2.25384	-2.63497	0.269908	4	19.525	0.000293504		SiJWB11BDJ_pcr_1	2.12892	2.26841	4.88944	5.39009	3.66922	1.71125	4	4.28835	0.023308
SiJWF04BDB_pcr_1	-1.98884	-2.34613	-3.24136	-2.95635	-2.63317	0.569179	4	9.25253	0.0026713		SiJWA10CAR_pcr_1	2.22293	2.1026	5.13517	5.22223	3.67073	1.7423	4	4.21365	0.0244212
SiJWG04CAD_pcr_1	-2.69325	-3.03157	-2.48087	-2.32643	-2.63303	0.305296	4	17.249	0.000424567		SiJWF01BAE_pcr_1	3.1075	3.33454	4.34686	3.91068	3.6749	0.561225	4	13.096	0.000961647
SiJWE12AAA_pcr_1	-2.70319	-2.85049	-2.67887	-2.28971	-2.63056	0.239554	4	21.9622	0.000206639		SiJWE01BAM_pcr_1	3.41145	3.63855	3.83027	3.83282	3.67827	0.199801	4	36.8193	4.40647e-05
SiJWD10ABO_pcr_2	-1.90834	-1.9185	-3.1574	-3.52998	-2.62856	0.839665	4	6.26096	0.00822309		SiJWD01BCO_pcr_1	3.99921	4.05392	3.2901	3.37797	3.6803	0.402056	4	18.3074	0.000355586
SiJWA10BDD_pcr_1	-2.53677	-2.98328	-2.49705	-2.49559	-2.62817	0.237508	4	22.1313	0.000201962		SiJWF11AAG_pcr_2	3.8915	3.70236	3.42512	3.72703	3.6865	0.193424	4	38.1184	3.97184e-05
SiJWG12AAA_pcr_1	-1.97269	-1.87829	-3.39541	-3.26499	-2.62785	0.81367	4	6.45924	0.00752777		SiJWC01BBK_pcr_1	0.867141	2.24937	5.80705	5.83876	3.69058	2.52606	4	2.922	0.0613966
SiJWG12BAY_pcr_1	-2.13219	-1.91912	-3.2932	-3.14915	-2.62342	0.698176	4	7.51505	0.00488271		SiJWG08BBW_pcr_1	3.76829	4.68524	2.99039	3.32615	3.69252	0.734494	4	10.0546	0.00209471
SiJWF05BAY_pcr_1	-1.44262	-1.38241	-3.61367	-4.04968	-2.62209	1.40821	4	3.724	0.0337141		SiJWF08BDG_pcr_1	3.28002	4.049	3.63863	3.80905	3.69417	0.323371	4	22.8479	0.00018363
SiJWD11AAX_pcr_2	-2.62189	-3.10743	-2.42271	-2.33228	-2.62108	0.34607	4	15.1477	0.000624682		SiJWE04ADR_pcr_1	2.74297	2.937	4.45382	4.64454	3.69458	0.993032	4	7.44101	0.00502383
SiJWF11CAM_pcr_1	-2.18204	-2.09951	-2.76479	-3.43615	-2.62063	0.61908	4	8.46619	0.0034595		SiJWA03ACK_pcr_2	1.80325	1.56408	6.05461	5.35771	3.69491	2.34179	4	3.15564	0.0510427
SiJWC12ADP_pcr_1	-1.83282	-1.84485	-3.03759	-3.76619	-2.62036	0.9502	4	5.51539	0.011738		SiJWH01ABO_pcr_2	4.05619	3.59222	3.67263	3.48313	3.70104	0.249176	4	29.7062	8.37838e-05
SiJWH07ADT_pcr_1	-1.4591	-1.47238	-3.69455	-3.83886	-2.61622	1.32978	4	3.93482	0.0292365		SiJWB08BDO_pcr_1	3.52652	3.45947	3.80143	4.0263	3.70343	0.26119	4	28.3582	9.6271e-05
SiJWA08BDO_pcr_1	-2.43349	-2.70776	-2.71077	-2.60713	-2.61479	0.130106	4	40.1946	3.38845e-05		SiJWE01BDW_pcr_2	3.73586	3.92143	3.62479	3.54043	3.70563	0.164629	4	45.018	2.4129e-05
SiJWB04ACO_pcr_2	-2.17748	-2.17028	-3.14511	-2.96168	-2.61364	0.513287	4	10.1839	0.00201769		SiJWH02AAT_pcr_2	3.37081	3.38147	3.73286	4.34678	3.70798	0.457888	4	16.196	0.000512057
SiJWC07ABT_pcr_2	-2.74292	-2.86273	-2.57002	-2.27152	-2.6118	0.256706	4	20.3485	0.000259482		SiJWA08AEA_pcr_1	2.741	2.5746	4.61883	4.92997	3.7161	1.23048	4	6.04007	0.00910055
SiJWF01BAU_pcr_1	-6.10961	-3.20777	-0.490379	-0.63936	-2.61178	2.64454	4	1.97522	0.142719		SiJWA02BCY_pcr_1	3.07834	3.03365	3.91624	4.84412	3.71809	0.853416	4	8.71342	0.00318189
SiJWG01CAC_pcr_1	-4.13467	-1.06226	-2.44401	-2.80401	-2.61124	1.26297	4	4.13506	0.0256678		SiJWF02ABW_pcr_2	3.18533	3.43761	3.96206	4.30681	3.72295	0.506136	4	14.7113	0.000681306
SiJWC08BCT_pcr_1	-1.44436	-1.6403	-3.90473	-3.44504	-2.60861	1.24802	4	4.18041	0.0249388		SiJWD08ACY_pcr_1	4.33427	3.9915	3.21654	3.35849	3.7252	0.527599	4	14.1213	0.000769236
SiJWG10ABG_pcr_2	-1.81736	-1.89776	-3.32369	-3.38682	-2.60641	0.865703	4	6.02149	0.00917987		SiJWC04ADT_pcr_1	3.25596	3.31557	4.12926	4.23013	3.73273	0.518322	4	14.4031	0.00072546
SiJWC09AAA_pcr_2	-1.88862	-2.17016	-3.14758	-3.20422	-2.60264	0.672239	4	7.74321	0.00447947		SiJWC05ADK_pcr_1	2.98855	3.19492	4.51077	4.23791	3.73304	0.753568	4	9.90764	0.00218705
SiJWB02BCG_pcr_1	-2.10659	-2.44917	-2.95621	-2.89005	-2.60051	0.398836	4	13.0405	0.000973808		SiJWA04BCV_pcr_1	3.50265	3.59715	4.07793	3.75999	3.73443	0.252464	4	29.5838	8.48251e-05
SiJWA05BAS_pcr_1	-2.19379	-2.2436	-3.05046	-2.90661	-2.59861	0.443073	4	11.73	0.00133147		SiJWE12BDY_pcr_1	2.94926	3.10413	4.36683	4.5242	3.7361	0.8241	4	9.06711	0.00283378
SiJWE07BDZ_pcr_1	-2.52653	-2.27329	-2.67077	-2.91497	-2.59639	0.268514	4	19.339	0.000302		SiJWD04BDR_pcr_1	3.2754	3.54024	4.0449	4.08845	3.73725	0.395856	4	18.8819	0.000324316
SiJWB09BBT_pcr_1	-2.60653	-2.5398	-2.94691	-2.28713	-2.59509	0.271906	4	19.0881	0.000313982		SiJWB09BCD_pcr_1	1.10625	1.33347	5.87905	6.64484	3.7409	2.92926	4	2.55416	0.0836384
SiJWC07AAN_pcr_2	-2.18275	-2.36369	-2.48672	-3.34427	-2.59436	0.515294	4	10.0694	0.00208568		SiJWG10BDN_pcr_1	1.83373	1.77954	5.64393	5.70883	3.74151	2.23446	4	3.34891	0.0440946
SiJWH07BBA_pcr_1	-2.42488	-2.52547	-2.78479	-2.625	-2.59003	0.153401	4	33.7683	5.7092e-05		SiJWH09BAB_pcr_1	2.71802	2.53161	4.56827	5.16052	3.7446	1.31764	4	5.68382	0.0107933
SiJWH03ADE_pcr_1	-1.85384	-1.84329	-3.14984	-3.5059	-2.58822	0.866368	4	5.97486	0.00938291		SiJWC07CAJ_pcr_1	3.01127	3.91381	3.84075	4.23679	3.75065	0.522094	4	14.3677	0.000730775
SiJWE04ABI_pcr_2	-1.94171	-2.19537	-3.08553	-3.12246	-2.58627	0.606909	4	8.52275	0.00339324		SiJWH12CAC_pcr_1	2.98979	3.42488	4.24531	4.36747	3.75686	0.660818	4	11.3703	0.00145944
SiJWF06ABX_pcr_2	-2.05906	-1.69214	-3.2015	-3.38938	-2.58552	0.836837	4	6.17926	0.00853411		SiJWF01BBJ_pcr_1	3.37096	3.1772	4.11605	4.36733	3.75788	0.573473	4	13.1057	0.000959534
SiJWD12BBI_pcr_1	-3.00325	-3.12948	-2.07749	-2.11302	-2.58081	0.563218	4	9.16451	0.00274684		SiJWE09CAI_pcr_1	3.49218	3.68085	3.66184	4.199	3.75847	0.305691	4	24.5899	0.000147441
SiJWE07BDG_pcr_1	-1.98198	-2.07534	-2.99466	-3.26671	-2.57967	0.647001	4	7.97425	0.00411477		SiJWE11ACJ_pcr_2	2.93549	2.78426	4.50395	4.83278	3.76412	1.05454	4	7.13891	0.00565872
SiJWD08BBV_pcr_1	-2.15797	-1.904	-3.05831	-3.19822	-2.57962	0.64448	4	8.00529	0.00406879		SiJWH08CAK_pcr_1	3.10095	3.25955	4.30176	4.39663	3.76472	0.679096	4	11.0874	0.00157182
SiJWB11ACB_pcr_2	-2.46151	-2.95775	-2.40384	-2.48879	-2.57797	0.255652	4	20.1679	0.000266478		SiJWD07ACB_pcr_2	3.39922	3.81405	3.95159	3.89668	3.76538	0.250568	4	30.0548	8.09098e-05
SiJWE04ACZ_pcr_1	-1.61051	-1.55141	-3.21713	-3.92877	-2.57695	1.18645	4	4.34398	0.0225212		SiJWC05BDV_pcr_1	3.7094	3.63542	3.847	3.87567	3.76687	0.113781	4	66.2126	7.59088e-06
SiJWE06BDI_pcr_1	-2.17983	-2.2054	-2.82892	-3.08998	-2.57603	0.455499	4	11.3108	0.00148218		SiJWA06BAR_pcr_1	3.32968	3.63019	3.91985	4.19631	3.76901	0.373102	4	20.2036	0.000265073
SiJWG12BCG_pcr_1	-2.23012	-2.55551	-2.59806	-2.90152	-2.5713	0.274721	4	18.7194	0.000332776		SiJWE02ACH_pcr_2	2.53163	2.59613	4.98932	4.97645	3.77338	1.39687	4	5.40262	0.0124316
SiJWC10ACY_pcr_1	-2.28438	-2.1233	-2.96829	-2.90752	-2.57087	0.429601	4	11.9686	0.00125467		SiJWA05ADY_pcr_newprimers	3.86276	3.75281	3.9069	3.58172	3.77605	0.14485	4	52.1373	1.554e-05
SiJWD05BCC_pcr_1	-2.45588	-2.58768	-2.51601	-2.71407	-2.56841	0.11105	4	46.257	2.22438e-05		SiJWH10BBG_pcr_1	3.21415	4.03561	3.74079	4.11606	3.77666	0.408228	4	18.5027	0.000344524
SiJWD09ACQ_pcr_2	-1.91741	-1.86137	-3.15136	-3.32242	-2.56314	0.781443	4	6.56002	0.00720389		SiJWC03BDZ_pcr_1	2.79601	3.40215	4.40922	4.50324	3.77765	0.822593	4	9.18475	0.00272923
SiJWH09BDX_pcr_1	-2.63594	-2.70407	-2.50862	-2.38267	-2.55782	0.142116	4	35.9962	4.71516e-05		SiJWF01ADV_pcr_1	3.51639	3.97083	3.75778	3.86969	3.77867	0.195309	4	38.6942	3.79742e-05
SiJWE08ADQ_pcr_1	-2.7997	-2.77439	-2.34533	-2.29735	-2.55419	0.269787	4	18.9349	0.000321618		SiJWG05ACL_pcr_2	2.67867	3.22911	4.46653	4.74346	3.77944	0.985898	4	7.667	0.0046091
SiJWH03AAY_pcr_1	-2.30835	-2.597	-2.54638	-2.75607	-2.55195	0.18535	4	27.5366	0.00010512		SiJWD05BAF_pcr_1	2.67755	2.62356	4.82562	4.9995	3.78156	1.30808	4	5.78184	0.010289
SiJWG09BCK_pcr_1	-2.13387	-2.10278	-2.86584	-3.09524	-2.54943	0.506692	4	10.0631	0.00208955		SiJWG01BCX_pcr_1	3.54589	3.76062	3.83735	4.00338	3.78681	0.1899	4	39.8821	3.46861e-05
SiJWA07ADR_pcr_1	-3.20536	-3.01394	-2.11262	-1.8565	-2.54711	0.662557	4	7.68872	0.00457167		SiJWE10BAT_pcr_1	2.25204	2.83705	4.89125	5.19648	3.79421	1.46791	4	5.16953	0.0140444
SiJWG01BDW_pcr_2	-3.53485	-2.97203	-1.9752	-1.68926	-2.54284	0.860059	4	5.91317	0.00966073		SiJWA06ADZ_pcr_1	2.86967	3.32933	4.67364	4.3096	3.79556	0.838633	4	9.05178	0.0028478
SiJWG10ADV_pcr_1	-2.2849	-2.39174	-2.83101	-2.66209	-2.54243	0.249418	4	20.3869	0.000258028		SiJWE08CAP_pcr_1	3.65988	3.95672	3.76743	3.8029	3.79673	0.122774	4	61.8491	9.31242e-06
SiJWA12ACX_pcr_1	-1.47823	-1.66591	-3.51916	-3.50536	-2.54216	1.1228	4	4.52826	0.0201483		SiJWE12ABM_pcr_2	3.31204	3.74098	3.95889	4.17848	3.7976	0.36971	4	20.5437	0.0002522
SiJWB11AAT_pcr_2	-1.79903	-1.798	-3.07066	-3.49756	-2.54131	0.875236	4	5.80715	0.0101639		SiJWC03BBL_pcr_1	2.54954	2.23286	5.32228	5.08655	3.79781	1.63219	4	4.65364	0.0187167
SiJWB07ABV_pcr_2	-1.66894	-1.27542	-3.60498	-3.61045	-2.53995	1.24338	4	4.08557	0.0264952		SiJWF06ACG_pcr_2	4.20264	4.08373	3.00494	3.90164	3.79824	0.543156	4	13.9858	0.000791537
SiJWF06ABS_pcr_2	-3.69573	-3.98576	-1.45695	-1.01706	-2.53888	1.51858	4	3.34375	0.0442639		SiJWB06ABU_pcr_2	3.51315	3.82133	3.68624	4.22837	3.81227	0.304729	4	25.0207	0.000139984
SiJWC05BEA_pcr_1	-1.59885	-1.70739	-3.55341	-3.29483	-2.53862	1.02888	4	4.93474	0.0159562		SiJWE05BDX_pcr_1	3.45967	3.94912	3.97791	3.86294	3.81241	0.240176	4	31.7468	6.86785e-05
SiJWC03BDU_pcr_1	-2.32407	-2.6393	-2.47617	-2.69813	-2.53442	0.168762	4	30.0354	8.10662e-05		SiJWE10BBM_pcr_1	3.34234	3.56921	4.23898	4.11217	3.81568	0.428908	4	17.7925	0.000387118
SiJWA06BCX_pcr_1	-2.67635	-2.89608	-2.30034	-2.25768	-2.53261	0.30676	4	16.512	0.000483467		SiJWA04BBH_pcr_1	3.43436	3.44851	4.12989	4.27653	3.82232	0.443905	4	17.2213	0.000426602
SiJWD06BDT_pcr_1	-1.96118	-2.27544	-2.85939	-3.03175	-2.53194	0.49953	4	10.1373	0.00204502		SiJWE07ACD_pcr_2	3.58983	3.99125	3.663	4.05166	3.82393	0.231342	4	33.0587	6.08392e-05
SiJWB01BCL_pcr_1	-2.31377	-2.10196	-2.90171	-2.80379	-2.53031	0.384316	4	13.1678	0.000946198		SiJWD06AAB_pcr_1	2.76576	2.82539	4.74078	4.9813	3.82831	1.19678	4	6.39768	0.00773509
SiJWB12AA1_pcr_1	-2.35762	-2.7289	-2.24292	-2.79175	-2.5303	0.270927	4	18.6788	0.000334937		SiJWF08BBZ_pcr_1	2.69665	2.93339	4.84775	4.84024	3.82951	1.17542	4	6.516	0.00734305
SiJWG03BAX_pcr_1	-1.1492	-1.347	-3.9774	-3.64471	-2.52958	1.48813	4	3.39967	0.0424718		SiJWE12ADE_pcr_1	3.66141	3.92205	3.95283	3.78484	3.83028	0.134191	4	57.0869	1.18408e-05
SiJWH01AAK_pcr_2	-2.05704	-1.89619	-2.72424	-3.43015	-2.52691	0.700803	4	7.21146	0.00549701		SiJWF06BBW_pcr_1	3.10133	2.38567	4.53236	5.33022	3.83739	1.33676	4	5.74132	0.0104936
SiJWB05BDS_pcr_1	-2.40933	-2.17718	-2.64583	-2.87321	-2.52639	0.300113	4	16.8362	0.000456297		SiJWA01BAF_pcr_1	3.23036	3.25027	4.06033	4.81858	3.83988	0.758421	4	10.126	0.00205171
SiJWH04AAC_pcr_1	-2.71262	-2.51849	-2.37284	-2.50042	-2.52609	0.140236	4	36.0264	4.70333e-05		SiJWH06CAF_pcr_1	3.17716	3.63903	4.21546	4.3465	3.84454	0.540735	4	14.2197	0.000753568
SiJWF02ADP_pcr_1	-1.72056	-1.92947	-3.27256	-3.16969	-2.52307	0.811631	4	6.21728	0.00838747		SiJWE07BDJ_pcr_1	4.3505	4.80055	2.80966	3.43293	3.84841	0.89634	4	8.58694	0.00332008
SiJWH09BBA_pcr_1	-2.7157	-3.1014	-2.07649	-2.1905	-2.52102	0.476654	4	10.578	0.00180493		SiJWA09ABN_pcr_2	3.52743	3.68258	4.04221	4.14653	3.84969	0.292667	4	26.3077	0.000120495
SiJWD08BCG_pcr_1	-2.68888	-3.21597	-1.97341	-2.19035	-2.51715	0.553862	4	9.08946	0.00281351		SiJWF09ADW_pcr_1	2.55548	2.63796	4.96699	5.24001	3.85011	1.45196	4	5.30331	0.0130875
SiJWG02AAK_pcr_2	-2.36535	-2.35941	-2.72499	-2.59548	-2.51131	0.179926	4	27.9149	0.000100916		SiJWF09ADM_pcr_1	2.57265	3.46938	4.64895	4.71124	3.85055	1.02576	4	7.50771	0.00489647
SiJWC05ACS_pcr_2	-2.4295	-2.40206	-2.5259	-2.66965	-2.50678	0.120875	4	41.4772	3.08414e-05		SiJWC07AAQ_pcr_2	2.79916	3.3728	4.19469	5.04887	3.85388	0.981161	4	7.85576	0.0042967
SiJWA07BAC_pcr_1	-2.01146	-1.86896	-3.43635	-2.70356	-2.50508	0.719947	4	6.95908	0.0060875		SiJWA05BAY_pcr_1	3.32739	3.6761	4.31511	4.10126	3.85496	0.440728	4	17.4936	0.000407143
SiJWG08ADW_pcr_1	-2.31241	-2.52128	-2.7342	-2.44729	-2.50379	0.176269	4	28.4088	9.57584e-05		SiJWE05AAX_pcr_1	2.85607	2.67189	4.86231	5.09707	3.87183	1.28503	4	6.02607	0.00916021
SiJWG07ABA_pcr_2	-1.99955	-2.11836	-2.87616	-3.01674	-2.5027	0.517877	4	9.66524	0.0023515		SiJWE07ABL_pcr_2	3.16319	3.36448	4.4551	4.50998	3.87319	0.708757	4	10.9295	0.00163957
SiJWH11BCR_pcr_1	-1.71151	-1.69806	-3.1377	-3.45642	-2.50092	0.92848	4	5.38713	0.012531		SiJWB05AAO_pcr_2	3.79455	4.054	3.86757	3.78072	3.87421	0.125772	4	61.6071	9.42253e-06
SiJWG01CAQ_pcr_1	-2.37589	-0.642929	-3.39879	-3.57863	-2.49906	1.34603	4	3.71323	0.0339656		SiJWD05BBW_pcr_1	4.18759	4.56559	3.40747	3.34973	3.8776	0.59696	4	12.9911	0.000984787
SiJWC09BAK_pcr_2	-2.73169	-3.05271	-2.01587	-2.19195	-2.49805	0.479039	4	10.4294	0.00188148		SiJWA10BCP_pcr_1	3.52196	3.44303	4.25991	4.29818	3.88077	0.461282	4	16.826	0.000457122
SiJWB02AAY_pcr_1	-2.13611	-3.24008	-2.41137	-2.19182	-2.49485	0.510838	4	9.76767	0.00228008		SiJWE06BDS_pcr_1	3.61998	3.64076	4.26344	4.00382	3.882	0.309402	4	25.0935	0.000138774
SiJWB12BCR_pcr_1	-2.04144	-1.5417	-3.20212	-3.19284	-2.49452	0.836956	4	5.96094	0.00944466		SiJWB02BBK_pcr_1	3.08144	3.58324	4.49834	4.36652	3.88239	0.669525	4	11.5974	0.00137683
SiJWG06ADC_pcr_1	-2.44427	-1.73326	-3.02824	-2.76015	-2.49148	0.558994	4	8.91415	0.00297781		SiJWG12BDO_pcr_1	2.88004	2.6765	4.90014	5.12926	3.89649	1.29725	4	6.00729	0.00924108
SiJWH02ACN_pcr_2	-2.36166	-2.65498	-2.21625	-2.72357	-2.48912	0.240266	4	20.7197	0.000245862		SiJWC11ACL_pcr_2	3.66673	3.99728	4.0061	3.91819	3.89708	0.158568	4	49.1532	1.85425e-05
SiJWE07BAK_pcr_2	-2.54797	-2.34182	-2.43231	-2.62761	-2.48743	0.125905	4	39.5128	3.56662e-05		SiJWF11BCQ_pcr_1	3.84503	3.90819	3.76506	4.07277	3.89776	0.130545	4	59.7155	1.0346e-05
SiJWB05ABK_pcr_2	-2.30913	-2.39987	-2.75588	-2.48053	-2.48635	0.192844	4	25.7861	0.000127928		SiJWC12BCD_pcr_1	4.29678	3.94105	3.6798	3.74164	3.91481	0.277973	4	28.1668	9.82401e-05
SiJWH06BAR_pcr_1	-1.66993	-1.94813	-3.23442	-3.09218	-2.48617	0.792227	4	6.2764	0.00816599		SiJWD09BDI_pcr_1	3.5969	3.97473	3.81646	4.29791	3.9215	0.294913	4	26.5942	0.000116655
SiJWF06AAK_pcr_2	-1.98322	-2.36584	-2.5195	-3.07092	-2.48487	0.4511	4	11.0169	0.0016016		SiJWA05BDQ_pcr_1	3.79373	3.35081	4.34451	4.23008	3.92978	0.453103	4	17.3461	0.000417537
SiJWC02AAE_pcr_2	-1.76379	-1.80497	-3.17263	-3.18427	-2.48141	0.805054	4	6.16459	0.0085916		SiJWC06AAB_pcr_2	3.67245	3.46631	5.00201	3.58719	3.93199	0.71834	4	10.9474	0.0016317
SiJWH01CAJ_pcr_1	-2.1569	-1.90383	-2.97504	-2.88792	-2.48092	0.53161	4	9.33361	0.00260411		SiJWB08BAB_pcr_1	3.57768	3.46488	4.3419	4.3529	3.93434	0.479202	4	16.4204	0.000491534
SiJWH10ACM_pcr_2	-2.085	-2.33199	-2.72574	-2.77719	-2.47998	0.329971	4	15.0315	0.000639124		SiJWG03CAK_pcr_1	3.44525	3.66006	4.19471	4.44093	3.93524	0.461467	4	17.0553	0.000439077
SiJWB12AAT_pcr_2	-2.30496	-2.24075	-2.29793	-3.06038	-2.476	0.390643	4	12.6765	0.00105882		SiJWA08ACT_pcr_2	2.79092	3.21532	4.86124	4.91223	3.94493	1.10142	4	7.16338	0.00560348
SiJWE02AAA_pcr_2	-2.11159	-2.02547	-2.91167	-2.85049	-2.47481	0.471102	4	10.5065	0.00184127		SiJWD04BCW_pcr_1	3.47578	3.38493	4.59826	4.32609	3.94627	0.607133	4	12.9997	0.000982875
SiJWE03ADI_pcr_1	-2.31968	-2.35267	-2.76752	-2.45305	-2.47323	0.204229	4	24.2202	0.000154269		SiJWC08ADW_pcr_1	4.01354	4.05928	3.89532	3.8201	3.94706	0.109254	4	72.255	5.84209e-06
SiJWH03ACR_pcr_2	-2.20538	-1.99139	-2.51094	-3.18357	-2.47282	0.519592	4	9.51832	0.00245921		SiJWA03BAO_pcr_1	2.55921	2.61017	5.51428	5.10466	3.94708	1.58215	4	4.98952	0.0154812
SiJWE06BBO_pcr_1	-2.77717	-2.47393	-2.36423	-2.24415	-2.46487	0.228374	4	21.5863	0.000217566		SiJWA03CAK_pcr_1	3.52442	3.92625	3.96575	4.37532	3.94793	0.347759	4	22.705	0.000187103
SiJWB04ADS_pcr_1	-2.33836	-2.24095	-2.65818	-2.62113	-2.46466	0.206505	4	23.8702	0.000161125		SiJWD03BCY_pcr_1	3.98018	4.18204	3.66284	3.96814	3.9483	0.214112	4	36.8808	4.38453e-05
SiJWC03ACN_pcr_2	-1.94961	-2.21671	-3.05401	-2.63351	-2.46346	0.483939	4	10.1809	0.00201945		SiJWG04BBO_pcr_1	3.23697	4.31538	4.17881	4.07066	3.95045	0.486084	4	16.2542	0.000506625
SiJWB07BDR_pcr_1	-1.23359	-1.27971	-3.50802	-3.82299	-2.46108	1.39681	4	3.52385	0.0388099		SiJWD04ACP_pcr_2	3.93841	4.18871	3.55295	4.13303	3.95327	0.287647	4	27.487	0.000105687
SiJWD09BCT_pcr_1	-2.63533	-2.8629	-2.27554	-2.06821	-2.46049	0.35618	4	13.816	0.000820713		SiJWB01CAG_pcr_1	3.78603	3.71284	4.17241	4.167	3.95957	0.244488	4	32.3907	6.4673e-05
SiJWA02ABF_pcr_2	-2.07067	-2.1059	-2.71241	-2.93686	-2.45646	0.435133	4	11.2906	0.00149		SiJWD08CAO_pcr_1	2.68485	2.34692	4.87377	5.9444	3.96249	1.73213	4	4.57528	0.0195953
SiJWC03BBM_pcr_1	-2.114	-1.71203	-3.13072	-2.8632	-2.45499	0.656127	4	7.48328	0.00494262		SiJWE09ABO_pcr_2	2.66204	2.54228	5.31364	5.33318	3.96278	1.5719	4	5.04204	0.0150429
SiJWC11ACM_pcr_2	-2.89755	-2.81583	-2.29911	-1.80395	-2.45411	0.50801	4	9.66166	0.00235405		SiJWE12BDN_pcr_1	2.70501	2.48972	4.95963	5.69868	3.96326	1.6082	4	4.9288	0.0160088
SiJWD10AAR_pcr_2	-3.0897	-3.19667	-1.81262	-1.69937	-2.44959	0.803413	4	6.09796	0.00885915		SiJWE11ACT_pcr_2	3.65936	3.65063	4.16137	4.38916	3.96513	0.370008	4	21.4326	0.000222255
SiJWF02BAU_pcr_1	-3.7242	-3.76616	-0.787371	-1.51986	-2.4494	1.52593	4	3.21037	0.0489424		SiJWD05BBV_pcr_1	2.67666	2.8637	4.88958	5.44464	3.96865	1.40438	4	5.65183	0.0109648
SiJWF08BBA_pcr_1	-2.27174	-2.36378	-2.51273	-2.63945	-2.44693	0.162273	4	30.1581	8.00833e-05		SiJWG03ACD_pcr_2	3.67908	3.16713	4.54029	4.50798	3.97362	0.669288	4	11.8742	0.00128435
SiJWB03BCQ_pcr_1	-1.40364	-1.50883	-3.26641	-3.60803	-2.44673	1.153	4	4.24412	0.023959		SiJWB03BCB_pcr_1	5.01482	4.88607	2.61462	3.39885	3.97859	1.16816	4	6.8117	0.00647134
SiJWC03AAH_pcr_2	-2.12917	-2.21475	-2.6931	-2.74442	-2.44536	0.318313	4	15.3645	0.000598872		SiJWF01ABN_pcr_2	4.34963	4.34429	3.6537	3.56936	3.97924	0.426002	4	18.6818	0.000334775
SiJWB09BBU_pcr_1	-3.18164	-3.73995	-1.39702	-1.45249	-2.44277	1.19761	4	4.0794	0.0266007		SiJWA10ABZ_pcr_2	3.24424	3.31253	4.54629	4.81706	3.98003	0.81817	4	9.7291	0.00230663
SiJWE09BDC_pcr_1	-2.59164	-2.55084	-2.46783	-2.15983	-2.44254	0.195382	4	25.0027	0.000140286		SiJWB06BAV_pcr_1	3.64091	3.46987	4.50341	4.32593	3.98503	0.506207	4	15.7447	0.000556929
SiJWC10BAN_pcr_1	-2.61656	-2.83672	-2.24083	-2.046	-2.43503	0.357474	4	13.6235	0.000855546		SiJWC09BBO_pcr_1	3.60559	3.26897	4.37236	4.696	3.98573	0.661367	4	12.053	0.00122893
SiJWG11ABD_pcr_2	-2.0186	-2.00095	-2.97198	-2.73875	-2.43257	0.497452	4	9.78011	0.00227159		SiJWC03ABQ_pcr_2	4.19141	4.21483	3.73367	3.81074	3.98767	0.250954	4	31.78	6.84639e-05
SiJWD08BDU_pcr_1	-0.832108	-1.9079	-2.87473	-4.10898	-2.43093	1.39554	4	3.48385	0.0399438		SiJWD12BAU_pcr_1	3.60021	3.98461	4.04417	4.32668	3.98892	0.299026	4	26.6794	0.000115545
SiJWD06ABG_pcr_2	-3.20831	-2.88414	-1.83155	-1.79358	-2.42939	0.72461	4	6.70538	0.00676824		SiJWG09AAM_pcr_2	5.052	5.08537	2.44197	3.39326	3.99315	1.3013	4	6.13718	0.00870037
SiJWD11CAO_pcr_1	-2.33003	-2.28104	-2.70532	-2.37396	-2.42259	0.192269	4	25.2	0.000137028		SiJWH04BDD_pcr_1	2.80468	2.92815	4.71126	5.53132	3.99385	1.34516	4	5.93813	0.00954704
SiJWG12BDM_pcr_1	-3.06863	-3.09652	-1.76289	-1.76038	-2.4221	0.76273	4	6.35114	0.00789683		SiJWG08BCB_pcr_1	3.21365	3.23962	4.35667	5.17693	3.99672	0.950237	4	8.41204	0.00352454
SiJWC09BAJ_pcr_2	-1.84105	-2.1969	-2.58649	-3.05965	-2.42102	0.523392	4	9.25128	0.00267235		SiJWH04BCF_pcr_1	3.46305	3.65124	4.58482	4.29031	3.99736	0.527957	4	15.1428	0.000625288
SiJWB12ACM_pcr_2	-2.25754	-2.26137	-2.58502	-2.57413	-2.41951	0.18488	4	26.1738	0.000122347		SiJWB08ABY_pcr_2	4.26829	4.04215	3.75553	3.92516	3.99778	0.215331	4	37.1316	4.29642e-05
SiJWH01BAF_pcr_1	-2.66175	-2.82928	-2.06218	-2.11893	-2.41804	0.384975	4	12.5621	0.0010876		SiJWF11BBD_pcr_1	2.70102	2.68029	4.88506	5.74725	4.00341	1.55619	4	5.14515	0.0142285
SiJWG05BCS_pcr_1	-1.10886	-0.388644	-4.0719	-4.09517	-2.41614	1.94768	4	2.48104	0.0891876		SiJWG03BAH_pcr_2	3.32349	3.20768	4.70466	4.79239	4.00706	0.858229	4	9.33796	0.00260057
SiJWF08AAO_pcr_2	-2.0891	-2.13447	-2.75825	-2.67935	-2.41529	0.352421	4	13.7069	0.000840224		SiJWF11CAV_pcr_1	3.16206	2.33535	4.64193	5.89626	4.0089	1.57911	4	5.07742	0.0147568
SiJWF07AAL_pcr_2	-2.39656	-2.29967	-2.7141	-2.25068	-2.41525	0.20825	4	23.1957	0.00017553		SiJWF10ABM_pcr_2	3.62433	3.55288	4.18914	4.66988	4.00906	0.524479	4	15.2878	0.00060784
SiJWD03ABL_pcr_2	-1.43789	-1.7259	-3.51435	-2.97668	-2.4137	0.992244	4	4.86514	0.0165875		SiJWB03CAE_pcr_1	3.47201	3.11901	4.86905	4.58414	4.01105	0.846739	4	9.47411	0.0024929
SiJWD05BDQ_pcr_1	-1.79574	-1.7123	-2.78446	-3.35766	-2.41254	0.796314	4	6.05927	0.00901952		SiJWC10ADU_pcr_1	3.59802	3.66479	4.48662	4.29729	4.01168	0.446685	4	17.962	0.000376341
SiJWB05CAI_pcr_1	-2.2968	-2.441	-2.4281	-2.47881	-2.41118	0.0792305	4	60.8649	9.77121e-06		SiJWA07AAI_pcr_2	4.21437	4.03013	3.89316	3.9297	4.01684	0.14386	4	55.8436	1.26488e-05
SiJWE05BBB_pcr_1	-1.29363	-1.31515	-3.66917	-3.36591	-2.41097	1.28378	4	3.75606	0.032979		SiJWH09AAQ_pcr_2	2.90866	2.96699	4.93679	5.26187	4.01857	1.25521	4	6.40304	0.00771674
SiJWF12ADS_pcr_1	-1.46648	-1.86061	-2.94228	-3.37022	-2.4099	0.893944	4	5.39161	0.0125022		SiJWH07ADC_pcr_1	3.88031	3.87024	4.0316	4.29867	4.02021	0.199778	4	40.2468	3.37531e-05
SiJWB03AAG_pcr_2	-2.59646	-2.89203	-1.74353	-2.40571	-2.40943	0.486934	4	9.89635	0.00219436		SiJWH02BDG_pcr_1	3.22883	3.26807	4.89297	4.72236	4.02806	0.903046	4	8.92104	0.00297111
SiJWD03BAN_pcr_1	-1.98502	-1.62352	-3.18139	-2.84684	-2.40919	0.726872	4	6.62892	0.00699293		SiJWA01BCB_pcr_1	4.31584	4.43416	3.68983	3.67448	4.02858	0.402969	4	19.9945	0.000273428
SiJWG09BBT_pcr_1	-2.79964	-2.66151	-1.81729	-2.35541	-2.40846	0.435643	4	11.0571	0.00158456		SiJWC10BBG_pcr_1	3.74431	3.31712	4.21391	4.8588	4.03354	0.660934	4	12.2056	0.00118413
SiJWA09AAP_pcr_2	-0.858253	-0.715389	-4.22896	-3.82798	-2.40765	1.87962	4	2.56185	0.0830805		SiJWA08BDZ_pcr_1	2.11003	2.07318	5.59792	6.35974	4.03522	2.26579	4	3.56186	0.03777
SiJWA08BDT_pcr_1	-2.45226	-2.41366	-2.54141	-2.20781	-2.40379	0.141179	4	34.0532	5.56739e-05		SiJWE04BBK_pcr_1	2.04686	3.76446	4.99406	5.35107	4.03911	1.49194	4	5.41459	0.0123555
SiJWB08BCG_pcr_1	-2.31267	-2.92229	-2.14528	-2.23344	-2.40342	0.352604	4	13.6324	0.000853897		SiJWF08ABM_pcr_2	4.60117	4.15723	3.64101	3.77823	4.04441	0.430619	4	18.7841	0.000329369
SiJWG07BBX_pcr_1	-1.74419	-1.44952	-3.34901	-3.0588	-2.40038	0.943069	4	5.09057	0.0146522		SiJWG10BAD_pcr_1	3.45913	3.74843	4.37281	4.6053	4.04642	0.533097	4	15.1808	0.000620646
SiJWE01AAN_pcr_2	-1.98631	-2.0335	-2.86585	-2.71164	-2.39932	0.454461	4	10.559	0.00181449		SiJWG04ADQ_pcr_1	3.58731	3.36284	4.48734	4.77245	4.05248	0.682996	4	11.8668	0.0012867
SiJWA07BAI_pcr_2	-1.96256	-2.1508	-2.63068	-2.84843	-2.39812	0.411397	4	11.6584	0.00135571		SiJWE06ABK_pcr_2	3.7968	3.76283	4.32712	4.32705	4.05345	0.316272	4	25.6327	0.000130231
SiJWB05BDO_pcr_1	-1.77138	-1.66263	-2.90391	-3.25242	-2.39759	0.799876	4	5.9949	0.00929495		SiJWH05BAR_pcr_1	3.90618	3.93652	4.17208	4.20417	4.05474	0.155073	4	52.2947	1.54002e-05
SiJWF08AAX_pcr_2	-2.18631	-1.98724	-2.76415	-2.65249	-2.39755	0.37075	4	12.9335	0.000997828		SiJWF01BBZ_pcr_1	3.56375	3.354	4.56746	4.73553	4.05519	0.697248	4	11.632	0.00136482
SiJWB12AAG_pcr_2	-1.92439	-1.69773	-2.86649	-3.09538	-2.396	0.68811	4	6.964	0.0060752		SiJWB05ADY_pcr_1	3.82428	3.65391	4.3186	4.4245	4.05532	0.374218	4	21.6736	0.000214961
SiJWA11CAH_pcr_1	-1.49019	-2.06164	-2.93064	-3.10086	-2.39583	0.756081	4	6.3375	0.00794505		SiJWD10AAY_pcr_1	1.74741	1.4158	6.54224	6.5271	4.05814	2.86286	4	2.83502	0.0659161
SiJWC05ABT_pcr_2	-2.38951	-2.08621	-2.64461	-2.45995	-2.39507	0.232311	4	20.6195	0.000249441		SiJWA02AAR_pcr_2	3.77275	3.76423	4.30929	4.40365	4.06248	0.341665	4	23.7805	0.000162949
SiJWD04BDO_pcr_1	-1.92001	-1.93899	-2.90138	-2.80593	-2.39158	0.535036	4	8.93988	0.00295291		SiJWC01ACI_pcr_2	3.66963	4.20752	4.1483	4.23039	4.06396	0.265154	4	30.6535	7.62725e-05
SiJWC02BBM_pcr_1	-2.09916	-2.36575	-2.46373	-2.61699	-2.38641	0.217626	4	21.9313	0.000207508		SiJWC04ADV_pcr_1	3.46596	3.59632	4.60458	4.5931	4.06499	0.618751	4	13.1393	0.000952285
SiJWA03ABI_pcr_2	-1.4243	-1.48317	-3.3715	-3.23273	-2.37792	1.06894	4	4.44914	0.0211253		SiJWD06ADB_pcr_1	4.05239	3.77553	4.26194	4.18588	4.06893	0.213919	4	38.0419	3.99581e-05
SiJWB07BDB_pcr_1	-2.2172	-2.37087	-2.4505	-2.46886	-2.37686	0.114622	4	41.4729	3.08511e-05		SiJWA02BBY_pcr_1	3.30946	3.41884	4.77187	4.77795	4.06953	0.815731	4	9.97763	0.00214241
SiJWA01BDC_pcr_1	-1.34102	-1.2903	-3.43451	-3.43772	-2.37589	1.22442	4	3.88084	0.0303064		SiJWC12ABO_pcr_2	3.29949	4.11341	4.47589	4.39439	4.07079	0.537135	4	15.1574	0.000623493
SiJWB10BAS_pcr_1	-1.61601	-2.33792	-2.7645	-2.78437	-2.3757	0.546728	4	8.69061	0.00320625		SiJWD01ABD_pcr_2	4.44719	4.13769	3.97382	3.78895	4.08691	0.279256	4	29.27	8.75751e-05
SiJWF10AAD_pcr_2	-3.03211	-3.16998	-1.54662	-1.75384	-2.37564	0.843767	4	5.63103	0.0110783		SiJWE03BCG_pcr_1	3.08705	3.04296	5.35085	4.87035	4.0878	1.19734	4	6.82813	0.006427
SiJWD07CAW_pcr_1	NA	-3.08404	-2.22183	-1.81884	-2.3749	0.646344	3	6.36418	0.0238113		SiJWD07ABY_pcr_2	3.98288	3.96056	4.02184	4.39731	4.09065	0.206006	4	39.7139	3.51279e-05
SiJWG08CAK_pcr_1	-1.02762	-1.13785	-3.88301	-3.45044	-2.37473	1.50296	4	3.16007	0.0508682		SiJWD06AAB_pcr_2	2.86994	3.1137	4.98916	5.39319	4.0915	1.28433	4	6.37142	0.00782581
SiJWB06BCC_pcr_1	-2.6183	-2.85554	-1.81058	-2.21201	-2.37411	0.460159	4	10.3186	0.00194138		SiJWF11BCZ_pcr_1	3.75458	3.49854	4.7455	4.41477	4.10335	0.576418	4	14.2374	0.000750789
SiJWG12ADO_pcr_1	-1.65503	-1.85147	-3.04348	-2.93875	-2.37218	0.720435	4	6.58542	0.00712517		SiJWE01CAR_pcr_1	NA	3.99698	4.27602	4.08307	4.11869	0.142888	3	49.9256	0.000400952
SiJWH06CAK_pcr_1	-2.53017	-2.21062	-2.519	-2.22794	-2.37193	0.176468	4	26.8823	0.000112957		SiJWD02BCT_pcr_1	4.08851	3.75116	4.25204	4.38527	4.11924	0.273764	4	30.0934	8.05998e-05
SiJWG04AA1_pcr_1	-2.26151	-1.86706	-2.70395	-2.64727	-2.36995	0.38864	4	12.1961	0.00118685		SiJWD02BCG_pcr_1	3.73041	3.5523	4.40054	4.80173	4.12125	0.582385	4	14.153	0.000764143
SiJWB02ABQ_pcr_2	-1.67511	-1.64837	-3.00579	-3.15016	-2.36986	0.819858	4	5.78114	0.0102925		SiJWF06AAZ_pcr_2	3.65723	3.43436	4.54994	4.84379	4.12133	0.681416	4	12.0964	0.00121597
SiJWA04CAU_pcr_1	-1.93327	-2.12994	-2.73262	-2.68278	-2.36965	0.399034	4	11.8769	0.00128346		SiJWA12AA1_pcr_1	3.84749	4.03108	4.28258	4.37167	4.1332	0.238917	4	34.5996	5.30829e-05
SiJWA04BBI_pcr_1	-1.25491	-1.3687	-3.62063	-3.23386	-2.36952	1.23239	4	3.84542	0.0310359		SiJWG06BDR_pcr_1	3.53701	3.56372	4.70163	4.73815	4.13513	0.675476	4	12.2436	0.00117331
SiJWF04BEA_pcr_1	-2.20026	-2.34391	-2.40843	-2.50883	-2.36536	0.129304	4	36.5861	4.49114e-05		SiJWE06ABL_pcr_2	3.72982	4.26295	4.45131	4.09846	4.13564	0.306553	4	26.9815	0.000111719
SiJWH10ADK_pcr_1	-3.18758	-1.71903	-2.18733	-2.36493	-2.36472	0.612505	4	7.72146	0.00451597		SiJWA06AAP_pcr_2	3.85939	4.27769	4.28195	4.12474	4.13594	0.198338	4	41.706	3.03373e-05
SiJWD07BDW_pcr_2	-2.79045	-3.32065	-1.56098	-1.78267	-2.36369	0.832631	4	5.67764	0.0108262		SiJWE10ADG_pcr_1	3.95383	4.03967	4.12714	4.4435	4.14103	0.213698	4	38.756	3.77932e-05
SiJWG12AAA_pcr_2	-2.01322	-1.60617	-2.89475	-2.9402	-2.36359	0.661073	4	7.15076	0.00563188		SiJWB10CAA_pcr_1	2.84905	3.26464	5.21598	5.23558	4.14131	1.2637	4	6.55425	0.00722193
SiJWD06ACT_pcr_2	-2.03175	-2.277	-2.48838	-2.65613	-2.36331	0.27004	4	17.5035	0.000406462		SiJWB06BDF_pcr_1	4.10588	3.46694	4.30687	4.69089	4.14265	0.511689	4	16.192	0.00051243
SiJWH10BBU_pcr_1	-3.63361	-3.3331	-1.33812	-1.14667	-2.36288	1.30198	4	3.62968	0.0360016		SiJWB04BBQ_pcr_1	3.07631	2.83928	5.04575	5.64124	4.15064	1.40202	4	5.92096	0.00962505
SiJWH06AAK_pcr_2	-1.97474	-2.32752	-2.39193	-2.74189	-2.35902	0.31429	4	15.0117	0.000641627		SiJWB01BBP_pcr_1	3.28609	4.35828	4.35492	4.60521	4.15112	0.588479	4	14.108	0.000771395
SiJWF06CAS_pcr_1	-2.26968	-2.2947	-2.40928	-2.44856	-2.35556	0.0868223	4	54.2616	1.37868e-05		SiJWD06AAP_pcr_2	4.23889	4.37719	3.87147	4.12407	4.1529	0.214269	4	38.7634	3.77715e-05
SiJWC09BDB_pcr_1	-1.54651	-2.50307	-2.41431	-2.94695	-2.35271	0.5858	4	8.03246	0.0040291		SiJWA08BAC_pcr_1	4.26887	4.18734	4.00144	4.17001	4.15692	0.112254	4	74.0627	5.42484e-06
SiJWC09ABO_pcr_2	-2.57159	-1.9796	-2.51422	-2.34398	-2.35235	0.266634	4	17.6447	0.00039685		SiJWH03BBG_pcr_1	3.80833	3.97882	4.31243	4.53109	4.15767	0.325275	4	25.564	0.000131279
SiJWA12ADY_pcr_newprimers	-1.23399	-0.779434	-3.74906	-3.6459	-2.35209	1.56513	4	3.00563	0.0574111		SiJWD09AAO_pcr_2	3.95977	4.18611	4.09805	4.39427	4.15955	0.182111	4	45.6814	2.30942e-05
SiJWC11ADF_pcr_1	-1.38619	-1.53022	-3.2474	-3.24286	-2.35167	1.03336	4	4.55151	0.0198724		SiJWC06ADN_pcr_1	3.86247	4.29639	4.22659	4.28484	4.16757	0.205684	4	40.524	3.3066e-05
SiJWH02BBO_pcr_1	-2.22524	-2.63276	-2.19891	-2.34472	-2.35041	0.19864	4	23.665	0.000165336		SiJWH12AAZ_pcr_2	3.81372	3.35808	4.88787	4.63956	4.17481	0.712248	4	11.7229	0.00133384
SiJWE07BAD_pcr_1	-2.58771	-2.6989	-1.98835	-2.12505	-2.35	0.346234	4	13.5746	0.000864703		SiJWB05ADY_pcr_newprimers	4.17707	3.66621	4.40885	4.51743	4.19239	0.37842	4	22.1573	0.000201254
SiJWC11BDO_pcr_1	-1.9483	-2.16865	-2.51652	-2.76192	-2.34885	0.361318	4	13.0016	0.000982455		SiJWE02ABP_pcr_2	4.42714	4.15603	4.03224	4.15464	4.19251	0.166839	4	50.2583	1.73472e-05
SiJWE07BDY_pcr_1	-1.67606	-1.65013	-2.93302	-3.134	-2.34831	0.795526	4	5.90378	0.00970393		SiJWA11BCD_pcr_1	3.91399	4.18512	4.38765	4.28572	4.19312	0.20363	4	41.1838	3.15044e-05
SiJWC12AAY_pcr_2	-3.23686	-3.30157	-1.11389	-1.73799	-2.34758	1.09461	4	4.28935	0.0232935		SiJWG01ACM_pcr_2	3.37145	3.5944	4.83311	4.97994	4.19473	0.829112	4	10.1186	0.0020561
SiJWF10BBI_pcr_1	-3.40589	-3.42591	-1.20682	-1.33968	-2.34457	1.23828	4	3.78683	0.0322927		SiJWH02CAF_pcr_1	2.90949	3.53179	5.14571	5.19589	4.19572	1.15442	4	7.26899	0.00537308
SiJWB04AAU_pcr_2	-1.96421	-2.23113	-2.65238	-2.52757	-2.34382	0.30864	4	15.1881	0.000619763		SiJWG05BCU_pcr_1	4.15001	3.68414	4.26684	4.68279	4.19594	0.410733	4	20.4315	0.000256353
SiJWB05BCN_pcr_1	-1.91502	-1.89348	-2.84175	-2.68369	-2.33349	0.499899	4	9.33583	0.00260231		SiHNG08w01me_pcr_1	3.05051	2.73995	5.35454	5.64382	4.19721	1.51334	4	5.54694	0.011553
SiJWC03AAI_pcr_2	-2.59907	-2.88769	-1.95939	-1.87657	-2.33068	0.49206	4	9.47316	0.00249363		SiJWE02ACV_pcr_2	4.31415	4.37671	3.76709	4.33098	4.19723	0.287975	4	29.15	8.86583e-05
SiJWE08ABV_pcr_2	-1.73664	-2.39167	-2.26885	-2.91437	-2.32788	0.483422	4	9.63084	0.00237615		SiJWH11AAG_pcr_2	4.13752	3.9018	4.33336	4.43469	4.20184	0.235001	4	35.7603	4.80892e-05
SiJWC02AAC_pcr_2	-1.09581	-0.643945	-3.88137	-3.6878	-2.32723	1.69473	4	2.74643	0.0709542		SiJWD11CAV_pcr_1	2.18224	3.49887	5.2237	5.92464	4.20736	1.69165	4	4.97427	0.0156116
SiJWE05ADK_pcr_1	-1.97473	-1.9516	-2.85099	-2.52634	-2.32592	0.439438	4	10.5859	0.00180099		SiJWH04ABO_pcr_2	4.30155	4.11327	4.32651	4.08912	4.20761	0.123693	4	68.0329	6.99803e-06
SiJWF06AAL_pcr_2	-2.526	-2.5522	-2.00035	-2.22387	-2.3256	0.263088	4	17.6793	0.000394544		SiJWD02AAG_pcr_2	4.29035	4.09397	4.34114	4.13431	4.21494	0.119369	4	70.6202	6.25706e-06
SiJWH04BCV_pcr_1	-2.04633	-2.3115	-2.10549	-2.83134	-2.32367	0.357022	4	13.017	0.00097902		SiJWC08BDX_pcr_1	2.84022	2.56184	5.86685	5.60318	4.21802	1.75865	4	4.79688	0.0172386
SiJWC07BAM_pcr_1	-2.10239	-1.04831	-2.91538	-3.22781	-2.32347	0.973498	4	4.77344	0.0174698		SiJWF05BBA_pcr_1	4.22219	4.07801	4.43007	4.1496	4.21997	0.151937	4	55.5491	1.28509e-05
SiJWG08CAG_pcr_1	-2.14467	-2.11356	-2.64587	-2.3829	-2.32175	0.247315	4	18.7757	0.000329813		SiJWB05ACQ_pcr_2	4.19407	4.24657	4.31957	4.12182	4.22051	0.0835246	4	101.06	2.13588e-06
SiJWA01CAH_pcr_1	-1.88127	-2.03544	-2.55758	-2.80984	-2.32103	0.435834	4	10.651	0.00176884		SiJWC04ADU_pcr_1	3.70529	3.82728	4.71097	4.63969	4.22081	0.527996	4	15.988	0.000532113
SiJWD08ACK_pcr_2	-2.26576	-2.57997	-2.11661	-2.31998	-2.32058	0.193124	4	24.032	0.000157906		SiJWF03ABG_pcr_2	3.92396	3.74632	4.6693	4.56496	4.22614	0.459248	4	18.4046	0.000350023
SiJWA05BAR_pcr_1	-1.68339	-1.19205	-3.32071	-3.08345	-2.3199	1.04272	4	4.44969	0.0211184		SiJWE10ADN_pcr_1	4.2421	3.83922	4.49994	4.3241	4.22634	0.279597	4	30.2317	7.95016e-05
SiJWB10BBO_pcr_1	-1.8033	-1.78581	-2.88957	-2.78114	-2.31496	0.602577	4	7.68352	0.00458059		SiJWE05BBM_pcr_1	3.84327	4.05824	4.58818	4.44181	4.23288	0.342627	4	24.7083	0.00014534
SiJWC08ACZ_pcr_1	-1.98566	-2.08004	-2.64265	-2.54561	-2.31349	0.328734	4	14.0751	0.000776742		SiJWB10CAC_pcr_1	3.88988	4.14138	4.4341	4.48126	4.23666	0.275768	4	30.7262	7.57336e-05
SiJWC12BCQ_pcr_1	-2.27646	-2.32907	-2.42039	-2.22102	-2.31173	0.0848138	4	54.5131	1.35969e-05		SiJWB08CAB_pcr_1	2.84807	2.83765	5.26589	6.0008	4.2381	1.63879	4	5.17223	0.0140242
SiJWC02BCE_pcr_1	-2.75452	-2.95609	-1.64753	-1.88568	-2.31096	0.641338	4	7.20667	0.00550749		SiJWG04BBM_pcr_1	3.80989	3.52367	4.97997	4.6513	4.24121	0.68674	4	12.3517	0.00114323
SiJWB05ABN_pcr_2	-1.53483	-1.67613	-2.98174	-3.05094	-2.31091	0.817092	4	5.65643	0.0109399		SiJWE03AAT_pcr_2	3.82647	3.50372	4.90511	4.75532	4.24765	0.688189	4	12.3444	0.00114522
SiJWC07CAA_pcr_1	-2.85256	-3.36847	-1.4083	-1.61329	-2.31065	0.951	4	4.85942	0.0166408		SiJWE09BDQ_pcr_1	3.85388	4.06526	4.72955	4.35793	4.25166	0.379758	4	22.3914	0.000195037
SiJWH02ABC_pcr_2	-2.37025	-2.68479	-1.82257	-2.3534	-2.30775	0.35756	4	12.9083	0.00100359		SiJWD03BCG_pcr_1	4.39854	4.25956	3.90363	4.52383	4.27139	0.26788	4	31.8903	6.77577e-05
SiJWD04BBU_pcr_1	-2.4605	-2.56794	-2.10467	-2.09358	-2.30667	0.24368	4	18.932	0.000321764		SiJWE08BBV_pcr_1	3.77619	4.55167	4.37622	4.383	4.27177	0.340209	4	25.1127	0.000138458
SiJWG08ADL_pcr_1	-2.96274	-3.10475	-1.69363	-1.45686	-2.30449	0.849574	4	5.42506	0.0122894		SiJWD04ABZ_pcr_2	4.02978	4.13039	4.50145	4.4483	4.27748	0.232617	4	36.777	4.42166e-05
SiJWF04BCK_pcr_1	-2.43445	-2.63384	-1.97803	-2.16757	-2.30347	0.28907	4	15.9371	0.000537179		SiJWH10CAB_pcr_1	3.63033	3.46576	5.04577	4.97082	4.27817	0.846304	4	10.1102	0.00206109
SiJWB10BCC_pcr_1	-0.674265	-0.643948	-4.02245	-3.87311	-2.30344	1.89974	4	2.42501	0.0937471		SiJWF02ACL_pcr_2	4.42459	4.29051	4.10873	4.29865	4.28062	0.129996	4	65.8578	7.71415e-06
SiJWH11BAT_pcr_1	-2.43543	-2.65559	-1.96881	-2.14042	-2.30006	0.305471	4	15.0591	0.000635653		SiJWD06AAL_pcr_2	3.32589	3.92968	4.31023	5.55832	4.28103	0.943055	4	9.07907	0.00282291
SiJWC11BCJ_pcr_1	-2.14955	-2.1472	-2.40534	-2.48691	-2.29725	0.175101	4	26.2391	0.000121438		SiJWC08ACY_pcr_1	3.42846	3.51109	4.95423	5.23348	4.28181	0.945171	4	9.0604	0.0028399
SiJWA05ACJ_pcr_2	-2.15462	-2.13362	-2.47517	-2.42244	-2.29646	0.177429	4	25.8859	0.000126459		SiJWC06BBG_pcr_1	4.05056	3.55802	4.59458	4.9267	4.28247	0.603065	4	14.2023	0.000756298
SiJWG02AAI_pcr_2	-1.55217	-1.85771	-2.82467	-2.94809	-2.29566	0.695244	4	6.6039	0.0070686		SiJWD12ADF_pcr_1	3.32035	3.33297	5.00944	5.47449	4.28431	1.12199	4	7.63698	0.00466153
SiJWH11BDS_pcr_1	-1.63361	-1.37994	-3.43295	-2.73102	-2.29438	0.959135	4	4.78428	0.0173624		SiJWG01ADU_pcr_1	3.16903	3.5525	4.93534	5.50072	4.2894	1.10797	4	7.74281	0.00448015
SiJWF12ADC_pcr_1	-2.58379	-2.73347	-1.91135	-1.94881	-2.29436	0.425316	4	10.7889	0.00170319		SiJWB02AAS_pcr_2	3.41004	3.23509	5.25544	5.26956	4.29253	1.12231	4	7.64943	0.00463968
SiJWF06AAB_pcr_2	-1.43112	-1.59692	-3.13045	-3.00967	-2.29204	0.902276	4	5.08058	0.0147316		SiJWH09AAO_pcr_2	4.02107	3.99625	4.45707	4.6969	4.29282	0.342568	4	25.0626	0.000139286
SiJWH04ACB_pcr_2	-2.54517	-2.92065	-1.93517	-1.76464	-2.29141	0.53688	4	8.53601	0.00337796		SiJWG10ACU_pcr_2	3.3742	3.76124	4.89497	5.15734	4.29694	0.863395	4	9.95359	0.00215761
SiJWC12ABL_pcr_2	-2.06643	-2.26679	-2.67818	-2.14796	-2.28984	0.27165	4	16.8588	0.000454486		SiJWH12BBB_pcr_1	4.0726	4.22693	4.58839	4.31646	4.3011	0.2164	4	39.7514	3.50288e-05
SiJWA04CAW_pcr_1	-3.53533	-3.62432	-0.995602	-1.00358	-2.28971	1.49015	4	3.07313	0.0544284		SiJWA05ACL_pcr_2	3.21767	3.30098	5.47317	5.216	4.30196	1.20897	4	7.1167	0.00570946
SiJWG11BDT_pcr_1	-2.43744	-2.04461	-2.37883	-2.29389	-2.28869	0.173065	4	26.449	0.000118581		SiJWF02ADQ_pcr_1	4.52923	4.85596	3.66057	4.17301	4.30469	0.51204	4	16.8139	0.000458103
SiJWG02ACO_pcr_2	-0.33457	-0.165164	-4.49158	-4.16256	-2.28847	2.35882	4	1.94035	0.147661		SiJWC02BAO_pcr_1	3.49888	3.46161	5.05552	5.23074	4.31169	0.962851	4	8.95608	0.00293738
SiJWG09ADW_pcr_1	-1.66095	-2.09514	-2.75238	-2.63947	-2.28699	0.50648	4	9.03091	0.00286702		SiJWE11ADS_pcr_1	3.69992	4.69896	4.33675	4.51452	4.31254	0.434363	4	19.8569	0.000279118
SiJWH12BDQ_pcr_1	-2.27573	-2.75437	-1.88307	-2.23264	-2.28645	0.358085	4	12.7704	0.00103597		SiJWH09ABY_pcr_2	3.72433	3.864	4.64996	5.03497	4.31832	0.627908	4	13.7546	0.000831615
SiJWH11BAK_pcr_2	-1.83534	-1.81402	-2.76361	-2.72407	-2.28426	0.530992	4	8.60374	0.00330127		SiJWA10ABA_pcr_2	3.11971	3.39536	4.96022	5.82085	4.32404	1.28556	4	6.72707	0.00670623
SiJWE11ACH_pcr_2	-2.36674	-2.37874	-2.09993	-2.28291	-2.28208	0.128697	4	35.4645	4.93001e-05		SiJWG05BDN_pcr_1	2.849	2.99492	5.55831	5.89449	4.32418	1.62604	4	5.31865	0.0129833
SiJWE02ADD_pcr_1	-1.64123	-1.76371	-2.91239	-2.80195	-2.27982	0.670054	4	6.80488	0.00648986		SiJWB10BAT_pcr_1	4.06027	4.31868	4.33217	4.58577	4.32422	0.214609	4	40.2985	3.36233e-05
SiJWH05ACH_pcr_2	-2.2498	-2.37096	-2.15783	-2.33189	-2.27762	0.0944833	4	48.2122	1.96485e-05		SiJWF08BBY_pcr_1	3.19646	3.38289	4.96738	5.7542	4.32523	1.24049	4	6.97344	0.00605172
SiJWF09BDE_pcr_1	-2.01526	-1.89996	-2.50798	-2.68261	-2.27645	0.37795	4	12.0463	0.00123094		SiJWE12BDF_pcr_1	2.986	3.40243	5.55795	5.36441	4.3277	1.32219	4	6.54624	0.00724709
SiJWF08BDO_pcr_1	-2.29013	-2.58409	-2.09259	-2.13072	-2.27438	0.2235	4	20.3524	0.000259336		SiJWH12BAH_pcr_2	4.80361	4.28882	3.92115	4.30873	4.33058	0.362219	4	23.9114	0.000160299
SiJWD02BDY_pcr_1	-1.79593	-1.82859	-2.61948	-2.85265	-2.27416	0.54195	4	8.39253	0.00354836		SiJWG09AAZ_pcr_2	5.54109	5.0753	2.91456	3.83358	4.34113	1.19326	4	7.27608	0.00535805
SiJWB11BBC_pcr_1	-2.56482	-2.45916	-2.02883	-2.02711	-2.26998	0.282759	4	16.056	0.000525447		SiJWA05BDH_pcr_1	3.86041	3.22933	5.29794	4.98261	4.34257	0.965085	4	8.99936	0.00289641
SiJWB02CAP_pcr_1	-2.4887	-2.73705	-1.86705	-1.97637	-2.26729	0.414138	4	10.9495	0.00163081		SiJWF04ABV_pcr_2	4.23317	4.14611	4.52074	4.47489	4.34373	0.1824	4	47.6286	2.03788e-05
SiJWH03BAB_pcr_1	-2.50551	-2.3328	-1.97093	-2.25635	-2.2664	0.222851	4	20.34	0.000259807		SiJWB06AAC_pcr_1	3.95712	3.93954	4.25357	5.22811	4.34459	0.60638	4	14.3296	0.000736558
SiJWD02AAU_pcr_2	-2.20597	-2.20858	-2.35303	-2.29786	-2.26636	0.0718547	4	63.0817	8.77742e-06		SiJWD09ADW_pcr_1	4.11518	4.25209	4.67921	4.34687	4.34834	0.24021	4	36.2045	4.63439e-05
SiJWB08BDZ_pcr_1	-1.14896	-1.98864	-2.67989	-3.24049	-2.2645	0.902891	4	5.01611	0.0152573		SiJWC01CAT_pcr_1	5.22817	2.82188	4.53352	4.81357	4.34928	1.05749	4	8.22564	0.00376118
SiJWA10ABJ_pcr_2	-1.96486	-2.07865	-2.48374	-2.51945	-2.26168	0.281283	4	16.0812	0.000523004		SiJWE10CAT_pcr_1	3.89228	3.67635	4.79847	5.03547	4.35064	0.666908	4	13.0472	0.00097232
SiJWA02ABI_pcr_2	-2.37216	-1.96048	-2.26361	-2.45045	-2.26167	0.214913	4	21.0474	0.000234617		SiJWD02ADQ_pcr_1	4.08383	4.61933	3.93332	4.76885	4.35133	0.405147	4	21.4803	0.000220787
SiJWG04ACV_pcr_2	-1.85825	-1.82156	-2.79862	-2.55981	-2.25956	0.494515	4	9.13849	0.00276972		SiJWB09AAC_pcr_1	4.39765	4.04688	4.64903	4.3127	4.35157	0.248299	4	35.051	5.10622e-05
SiJWD06BCU_pcr_1	-2.32348	-2.60387	-2.11304	-1.99741	-2.25945	0.266348	4	16.9661	0.000445982		SiJWF10BAA_pcr_2	4.13548	4.09189	4.24021	4.94776	4.35384	0.400812	4	21.7251	0.000213444
SiJWA06ADN_pcr_1	-2.55743	-2.40558	-1.82822	-2.24527	-2.25912	0.314275	4	14.3767	0.000729421		SiJWF01BDW_pcr_2	4.57651	4.24684	4.12743	4.46917	4.35499	0.204602	4	42.5704	2.85289e-05
SiJWA08BBI_pcr_1	-1.4914	-1.54747	-2.94535	-3.0493	-2.25838	0.854621	4	5.28509	0.0132127		SiJWH02ACP_pcr_2	2.92053	2.76031	5.35709	6.39207	4.3575	1.8032	4	4.83308	0.0168893
SiJWH03AAD_pcr_2	-2.68479	-2.9317	-1.74846	-1.65539	-2.25508	0.647755	4	6.96277	0.00607827		SiJWF06CAX_pcr_1	2.56875	2.96075	5.96412	5.93675	4.35759	1.84624	4	4.72051	0.018007
SiJWC05ACS_pcr_1	-2.12135	-2.42462	-2.26658	-2.20541	-2.25449	0.128096	4	35.2002	5.0417e-05		SiJWE04BCA_pcr_1	3.66539	3.92692	4.98385	4.86024	4.3591	0.660675	4	13.1959	0.000940259
SiJWF12BCQ_pcr_1	-2.28712	-2.52188	-2.04235	-2.15496	-2.25158	0.206107	4	21.8486	0.000209862		SiJWG03BCY_pcr_1	3.98503	3.80656	4.95555	4.69687	4.361	0.552281	4	15.7927	0.000551911
SiJWB08BCH_pcr_1	-2.13733	-2.713	-2.09459	-2.06068	-2.2514	0.309327	4	14.5567	0.00070299		SiJWA04BAA_pcr_2	3.79561	3.20048	4.87856	5.57232	4.36174	1.06484	4	8.19232	0.00380567
SiJWA01AAM_pcr_2	-1.54636	-1.52341	-3.0922	-2.82727	-2.24731	0.829771	4	5.41671	0.0123421		SiJWF10BCK_pcr_1	4.0453	4.07745	4.48669	4.85621	4.36641	0.383399	4	22.7774	0.000185334
SiJWG04BBB_pcr_1	-2.29665	-2.57984	-2.20643	-1.89557	-2.24462	0.281882	4	15.926	0.000538299		SiJWD05BAE_pcr_1	3.51656	3.32276	5.21975	5.41104	4.36753	1.10013	4	7.94	0.00416629
SiJWD01BDK_pcr_1	-2.51671	-1.70017	-2.7969	-1.96128	-2.24376	0.501916	4	8.94079	0.00295204		SiJWF10BDB_pcr_1	3.53027	3.4357	5.31721	5.19785	4.37026	1.02642	4	8.51555	0.00340158
SiJWE10BAE_pcr_1	-1.78229	-1.85332	-2.81287	-2.52147	-2.24249	0.505437	4	8.87347	0.00301774		SiJWC05ACB_pcr_2	4.18361	4.43369	4.51032	4.36388	4.37287	0.139633	4	62.6338	8.96699e-06
SiJWH11BCO_pcr_1	-1.7732	-1.49466	-2.81708	-2.88188	-2.2417	0.711445	4	6.30184	0.00807305		SiJWG12ADY_pcr_newprimers	2.89792	3.60589	5.46597	5.52239	4.37305	1.32665	4	6.59262	0.00710306
SiJWA07ABP_pcr_2	-2.01044	-1.77542	-2.60911	-2.56165	-2.23915	0.411596	4	10.8804	0.00166146		SiJWH04CAR_pcr_1	4.20964	4.59582	4.24343	4.45221	4.37527	0.182004	4	48.0788	1.98122e-05
SiJWD10BAA_pcr_2	-1.13875	-1.13492	-3.65055	-3.03131	-2.23888	1.2974	4	3.45133	0.0408969		SiJWH05ACV_pcr_2	3.09508	3.01858	5.36783	6.03092	4.3781	1.54982	4	5.64982	0.0109757
SiJWB11BCA_pcr_1	-1.79648	-1.82306	-2.61271	-2.72075	-2.23825	0.49685	4	9.00976	0.00288668		SiJWE06BDM_pcr_1	3.67274	3.52869	5.03515	5.30185	4.38461	0.913582	4	9.59872	0.00239948
SiJWG08CAG_pcr_1	-2.0661	-2.02382	-2.39899	-2.46323	-2.23804	0.225143	4	19.881	0.000278109		SiJWE05AAX_pcr_2	2.96053	3.26466	5.70757	5.61196	4.38618	1.47636	4	5.9419	0.00953
SiJWA08CAU_pcr_1	-2.03596	-2.04383	-2.44913	-2.41933	-2.23706	0.228016	4	19.622	0.000289199		SiJWC08ADH_pcr_1	3.38288	3.29718	5.43215	5.43667	4.38722	1.2097	4	7.25341	0.00540627
SiJWH05ACS_pcr_1	-2.3785	-2.53655	-1.80979	-2.22298	-2.23696	0.312228	4	14.329	0.000736649		SiJWE11BCH_pcr_1	3.37023	3.03444	5.67647	5.48773	4.39222	1.38293	4	6.35204	0.00789364
SiJWD09ACT_pcr_2	-2.06497	-2.62857	-1.9981	-2.25567	-2.23683	0.283043	4	15.8056	0.000550577		SiJWG01ABT_pcr_2	3.93408	4.25307	4.68804	4.70155	4.39418	0.37078	4	23.7024	0.000164557
SiJWB07BEA_pcr_1	-2.70928	-2.455	-2.02241	-1.75464	-2.23533	0.427897	4	10.448	0.00187168		SiJWE04ADU_pcr_1	4.25828	4.30297	4.26716	4.77045	4.39971	0.247912	4	35.4941	4.91771e-05
SiJWG10ACV_pcr_2	-2.26955	-2.79017	-2.09775	-1.7731	-2.23264	0.424885	4	10.5094	0.00183976		SiJWE12ACS_pcr_2	4.49705	4.25644	4.40913	4.44904	4.40292	0.104056	4	84.6256	3.63703e-06
SiJWD01BAV_pcr_1	-2.5632	-2.59773	-1.89775	-1.86676	-2.23136	0.403557	4	11.0585	0.00158396		SiJWG12ACO_pcr_2	3.85634	4.05195	4.73093	5.0004	4.40991	0.543542	4	16.2266	0.000509196
SiJWC02AAC_pcr_1	-0.869494	-0.654194	-3.86898	-3.52435	-2.22925	1.70252	4	2.61877	0.0790852		SiJWA05ACB_pcr_2	3.4811	3.67757	5.24451	5.2485	4.41292	0.965879	4	9.13762	0.00277049
SiJWG11CAE_pcr_1	-2.96072	-2.66689	-1.81619	-1.46964	-2.22836	0.700998	4	6.35767	0.00787385		SiJWG02BDL_pcr_1	2.94655	2.64755	6.08123	5.97842	4.41344	1.8709	4	4.71798	0.0180332
SiJWE08BBN_pcr_1	-2.29644	-2.64806	-1.98854	-1.97896	-2.228	0.316492	4	14.0794	0.000776053		SiJWG11ABH_pcr_2	3.90757	4.38898	4.37957	4.98926	4.41635	0.443166	4	19.9309	0.000276039
SiJWE09ABU_pcr_2	-1.79235	-1.94908	-2.66265	-2.50532	-2.22735	0.421666	4	10.5645	0.00181171		SiJWF08BCE_pcr_1	3.96806	4.27113	4.76256	4.67206	4.41845	0.368459	4	23.9834	0.000158865
SiJWE04BAX_pcr_1	-1.29204	-1.32606	-2.98456	-3.30558	-2.22706	1.06819	4	4.16979	0.025107		SiJWC07BCC_pcr_1	3.68776	4.28995	4.76551	4.94068	4.42098	0.560823	4	15.766	0.000554689
SiJWF12AAT_pcr_2	-1.66182	-2.50284	-1.58041	-3.15053	-2.2239	0.745311	4	5.9677	0.0094146		SiJWD01BCM_pcr_1	4.80677	3.91913	4.29858	4.66077	4.42131	0.397143	4	22.2656	0.000198345
SiJWG09BDN_pcr_1	-2.05468	-1.9954	-2.33598	-2.48717	-2.21831	0.232806	4	19.0572	0.000315506		SiJWA03BDG_pcr_1	3.81349	4.48758	4.47094	4.91631	4.42208	0.455092	4	19.4338	0.000297629
SiJWC05BAT_pcr_1	-1.49943	-1.45639	-2.86252	-3.05261	-2.21774	0.857976	4	5.1697	0.0140431		SiJWG08BAR_pcr_1	4.2393	4.05005	4.68651	4.7281	4.42599	0.334329	4	26.4769	0.000118207
SiJWD12BAG_pcr_2	-2.28642	-2.70479	-1.83046	-2.03678	-2.21461	0.376221	4	11.7729	0.0013172		SiJWC06AAH_pcr_2	3.0351	3.52535	5.61428	5.54727	4.4305	1.34349	4	6.59548	0.00709428
SiJWG11BCR_pcr_1	-1.81266	-1.62397	-2.64254	-2.77167	-2.21271	0.57846	4	7.65035	0.00463808		SiJWB10ABS_pcr_2	4.18043	4.16853	4.38318	4.99317	4.43133	0.387294	4	22.8835	0.000182778
SiJWE05ADO_pcr_1	-2.01845	-1.74852	-2.96631	-2.11577	-2.21226	0.526153	4	8.4092	0.00352799		SiJWA12BCJ_pcr_1	3.77967	3.98854	4.60653	5.35721	4.43299	0.709144	4	12.5024	0.00110301
SiJWG09ACQ_pcr_2	-0.990054	-1.02673	-3.61278	-3.21913	-2.21217	1.39935	4	3.16172	0.0508036		SiJWD06ADS_pcr_1	3.21183	3.66121	5.391	5.50486	4.44222	1.17661	4	7.5509	0.00481627
SiJWE10ACN_pcr_2	-1.95168	-1.76994	-2.70831	-2.40092	-2.20771	0.426271	4	10.3583	0.00191968		SiJWB10BCV_pcr_1	3.26185	3.27574	5.53855	5.71145	4.4469	1.3622	4	6.52899	0.00730162
SiJWC03BBX_pcr_1	-1.92289	-1.64858	-2.58861	-2.67029	-2.20759	0.500936	4	8.81389	0.00307752		SiJWG10ABS_pcr_2	3.70241	3.81037	5.28837	4.99381	4.44874	0.809651	4	10.9893	0.00161349
SiJWG10CAD_pcr_1	-1.5822	-1.83456	-2.57871	-2.82666	-2.20553	0.591954	4	7.4517	0.00500312		SiJWF06AAZ_pcr_1	4.45039	3.84954	4.66233	4.86387	4.45653	0.438465	4	20.3279	0.00026027
SiJWE09ABV_pcr_2	-2.42694	-2.60993	-2.11309	-1.67029	-2.20506	0.411334	4	10.7215	0.00173485		SiJWF01BBR_pcr_1	2.2732	1.85409	6.68584	7.07854	4.47292	2.79185	4	3.20427	0.049171
SiJWA07BDD_pcr_1	-1.17579	-1.24041	-3.18396	-3.21638	-2.20414	1.1505	4	3.83162	0.0313262		SiJWF05ADW_pcr_1	4.78597	4.77869	4.12989	4.20487	4.47485	0.356369	4	25.1136	0.000138443
SiJWE09AAU_pcr_2	-1.89713	-1.76739	-2.78395	-2.36517	-2.20341	0.464439	4	9.48847	0.00248189		SiJWC03ABS_pcr_2	3.76601	3.8615	5.11644	5.16257	4.47663	0.766644	4	11.6785	0.00134885
SiJWD09AAU_pcr_2	-1.9361	-2.25665	-2.05891	-2.55711	-2.20219	0.270967	4	16.2543	0.000506616		SiJWF08ACZ_pcr_1	4.20927	4.0575	4.76381	4.88778	4.47959	0.407689	4	21.9755	0.000206264
SiJWE08CAN_pcr_1	-1.89357	-2.49603	-1.98089	-2.43226	-2.20069	0.307398	4	14.3181	0.000738307		SiJWA05BDN_pcr_1	4.3595	4.18542	4.64265	4.74936	4.48423	0.258355	4	34.7138	5.25617e-05
SiJWH04ADX_pcr_1	-2.35453	-2.77264	-1.72974	-1.94028	-2.1993	0.462022	4	9.52032	0.0024577		SiJWB10CAG_pcr_1	2.96051	2.97242	5.92657	6.09588	4.48884	1.75926	4	5.1031	0.0145535
SiJWH07BDV_pcr_1	-2.11748	-2.3744	-2.12899	-2.17606	-2.19923	0.119494	4	36.809	4.41016e-05		SiJWA05ACA_pcr_2	4.52826	4.08875	4.69927	4.67581	4.49802	0.283153	4	31.7709	6.85226e-05
SiJWH09BDJ_pcr_1	-1.96374	-1.77493	-2.57182	-2.48158	-2.19802	0.389024	4	11.3002	0.0014863		SiJWD08BDZ_pcr_1	2.10055	2.78677	5.93884	7.16853	4.49867	2.44157	4	3.68506	0.0346352
SiJWB03BDZ_pcr_1	-1.69812	-2.49733	-2.28802	-2.29998	-2.19586	0.345428	4	12.7139	0.00104966		SiJWH11BAG_pcr_2	3.98015	3.95648	4.97579	5.11028	4.50567	0.622986	4	14.4648	0.000716331
SiJWA08BCK_pcr_1	-0.731838	-1.12968	-3.86292	-3.05502	-2.19486	1.50525	4	2.91628	0.0616819		SiJWG07BAQ_pcr_1	4.56225	4.74881	4.31443	4.41212	4.5094	0.189375	4	47.6241	2.03846e-05
SiJWE05BAG_pcr_2	-0.747332	-0.411456	-3.99069	-3.62859	-2.19452	1.87585	4	2.33976	0.101244		SiJWD03BEA_pcr_1	3.98024	4.12142	4.41164	5.52593	4.50981	0.700815	4	12.8702	0.00101242
SiJWH08ABX_pcr_2	-1.93678	-2.03124	-2.4245	-2.38465	-2.19429	0.246395	4	17.8112	0.000385909		SiJWA11AA1_pcr_1	2.88015	2.37525	6.29804	6.49101	4.51111	2.18595	4	4.12738	0.025794
SiJWB02AAY_pcr_2	-2.27571	-2.41113	-2.09075	-1.99238	-2.19249	0.187195	4	23.4246	0.000170455		SiJWF12BDY_pcr_1	4.0111	4.17069	4.45667	5.40892	4.51184	0.625811	4	14.4192	0.00072307
SiJWB02BBY_pcr_1	-1.45561	-1.53766	-2.86525	-2.90948	-2.192	0.803838	4	5.45383	0.0121102		SiJWF06CAP_pcr_1	4.26564	4.2904	4.58101	4.91124	4.51207	0.302191	4	29.8624	8.24794e-05
SiJWG10ACS_pcr_1	-1.55318	-2.06068	-2.54659	-2.59659	-2.18926	0.488106	4	8.97044	0.00292371		SiJWB01ABU_pcr_2	3.44563	4.11778	5.18437	5.30747	4.51381	0.890208	4	10.141	0.00204281
SiJWB02CAL_pcr_1	-0.408771	-0.179135	-4.28639	-3.87699	-2.18782	2.19523	4	1.99325	0.140241		SiJWA10BAJ_pcr_2	4.61168	4.84373	4.10191	4.54344	4.52519	0.310079	4	29.1873	8.83197e-05
SiJWF06BDH_pcr_1	-1.41566	-2.35249	-2.4406	-2.54072	-2.18737	0.520186	4	8.40994	0.00352709		SiJWB07BAM_pcr_1	NA	4.7254	4.40021	4.45982	4.52848	0.173125	3	45.3057	0.00048683
SiJWE05BBR_pcr_1	-2.30346	-2.64221	-1.75617	-2.04163	-2.18587	0.377502	4	11.5807	0.0013827		SiJWH09AAC_pcr_1	4.20751	4.215	4.82267	4.89464	4.53496	0.374943	4	24.1901	0.000154843
SiJWA07BCW_pcr_1	-1.71865	-1.80946	-2.67479	-2.53787	-2.18519	0.490891	4	8.90296	0.00298873		SiJWA02AAX_pcr_2	4.47657	4.55109	4.52893	4.58791	4.53612	0.0465627	4	194.839	2.98125e-07
SiJWB10ACK_pcr_2	-2.45122	-2.86745	-1.42762	-1.96022	-2.17663	0.621952	4	6.99934	0.00598787		SiJWC06ADW_pcr_1	3.89177	3.81819	5.20565	5.23027	4.53647	0.787555	4	11.5204	0.00140415
SiJWB10BAO_pcr_1	-0.99822	-1.05479	-3.15299	-3.49983	-2.17646	1.33558	4	3.2592	0.0471602		SiJWF03BAV_pcr_1	3.87572	3.83788	4.91858	5.52011	4.53807	0.82425	4	11.0114	0.00160397
SiJWF08ABS_pcr_2	-1.72304	-1.98527	-2.69853	-2.29811	-2.17624	0.42012	4	10.3601	0.00191869		SiJWF09BBK_pcr_1	3.70867	3.59696	5.18824	5.66069	4.53864	1.04189	4	8.71234	0.00318304
SiJWB12BCH_pcr_1	-2.18151	-2.29858	-2.12341	-2.09885	-2.17559	0.0890189	4	48.8793	1.88557e-05		SiJWF04BDM_pcr_1	4.47987	4.22519	4.66116	4.79643	4.54066	0.247085	4	36.7538	4.43005e-05
SiJWG09BBV_pcr_1	-2.58689	-2.66661	-1.87773	-1.56901	-2.17506	0.537565	4	8.09227	0.00394353		SiJWG04BCD_pcr_1	3.17246	3.20026	5.79253	5.99856	4.54095	1.56645	4	5.79777	0.01021
SiJWE07AAA_pcr_2	-2.38556	-2.4505	-1.76371	-2.09964	-2.17485	0.313623	4	13.8692	0.000811418		SiJWF08BBG_pcr_1	4.23668	4.30766	4.406	5.21353	4.54097	0.45372	4	20.0166	0.000272527
SiJWD03ACJ_pcr_2	-2.63938	-2.87425	-1.55554	-1.62548	-2.17366	0.68076	4	6.38599	0.0077753		SiJWB07BBN_pcr_1	4.6255	4.19502	4.33238	5.01506	4.54199	0.362903	4	25.0314	0.000139806
SiJWA01ACJ_pcr_2	-1.62324	-1.86709	-2.53818	-2.65421	-2.17068	0.50356	4	8.62134	0.00328172		SiJWG01AAW_pcr_2	4.23179	4.59635	4.68021	4.66527	4.5434	0.21093	4	43.0797	2.75303e-05
SiJWH11ABJ_pcr_2	-2.36113	-2.09687	-2.17334	-2.04105	-2.1681	0.139645	4	31.0515	7.33841e-05		SiJWB09AAC_pcr_2	4.69171	4.37002	4.53694	4.60572	4.5511	0.136314	4	66.7736	7.40126e-06
SiJWE05ADV_pcr_1	-1.68535	-1.42573	-2.9096	-2.65091	-2.1679	0.722745	4	5.99906	0.00927678		SiJWA12AAL_pcr_2	3.56587	4.31305	5.21104	5.11615	4.55153	0.770744	4	11.8107	0.0013048
SiJWB07BBL_pcr_1	-1.67279	-1.823	-2.66971	-2.49785	-2.16584	0.491512	4	8.81296	0.00307846		SiJWA02BCN_pcr_1	3.95209	4.28496	5.05199	4.9266	4.55391	0.523291	4	17.4049	0.000413352
SiJWB04BBN_pcr_1	-1.40183	-0.872921	-2.93121	-3.45325	-2.1648	1.22455	4	3.53568	0.0384825		SiJWE06ADD_pcr_1	4.28486	3.38822	5.39749	5.15965	4.55756	0.914645	4	9.96574	0.00214991
SiJWD01BCQ_pcr_1	-2.50997	-2.46008	-1.82288	-1.86627	-2.1648	0.370749	4	11.678	0.00134902		SiJWC12BAC_pcr_1	3.29807	3.47539	5.63377	5.82919	4.55911	1.35802	4	6.71434	0.00674255
SiJWB12AAA_pcr_1	-1.59648	-1.83363	-2.68404	-2.53142	-2.16139	0.528089	4	8.18572	0.00381457		SiJWG08ADS_pcr_1	4.43133	4.58295	4.56777	4.67485	4.56422	0.100434	4	90.8899	2.93586e-06
SiJWH12BBN_pcr_1	-2.38433	-2.13342	-1.97066	-2.15613	-2.16114	0.17019	4	25.3968	0.00013388		SiJWE10BAJ_pcr_2	4.52885	4.91923	4.34704	4.47652	4.56791	0.246366	4	37.0822	4.31357e-05
SiJWD06CAX_pcr_1	-1.35612	-1.48021	-2.71934	-3.08025	-2.15898	0.869491	4	4.96608	0.0156822		SiJWH09AAC_pcr_2	4.30302	4.19824	4.72172	5.0551	4.56952	0.394895	4	23.143	0.000176727
SiJWA04BDY_pcr_1	-2.60086	-2.96341	-1.55963	-1.5096	-2.15837	0.735591	4	5.86841	0.00986909		SiJWF04CAH_pcr_1	4.64217	4.3651	4.56011	4.72786	4.57381	0.155083	4	58.9854	1.07347e-05
SiJWC02ADE_pcr_1	-2.63332	-2.98243	-1.45074	-1.54616	-2.15316	0.770297	4	5.59048	0.011304		SiJWG02ADS_pcr_1	4.46041	4.4041	4.76832	4.71107	4.58598	0.180501	4	50.8137	1.6785e-05
SiJWF09CAV_pcr_1	-2.71993	-2.75966	-1.46938	-1.66007	-2.15226	0.683072	4	6.30171	0.00807352		SiJWC07AAS_pcr_2	4.30463	4.22774	5.06305	4.7578	4.5883	0.393526	4	23.3189	0.000172774
SiJWG04BDM_pcr_1	-1.43378	-1.72985	-2.72058	-2.7173	-2.15038	0.667556	4	6.44254	0.00758329		SiJWD08BBE_pcr_1	4.55714	4.31273	4.70733	4.78682	4.591	0.208533	4	44.0314	2.57856e-05
SiJWF05BBK_pcr_1	-2.65602	-2.27284	-1.83821	-1.83054	-2.1494	0.395984	4	10.856	0.00167244		SiJWE05CAM_pcr_1	4.023	4.26979	4.88185	5.19066	4.59133	0.538512	4	17.0519	0.000439341
SiJWH05BDO_pcr_1	-2.012	-1.62969	-2.48642	-2.46649	-2.14865	0.409512	4	10.4937	0.00184785		SiJWF07BCN_pcr_1	4.42647	4.30355	4.73088	4.90876	4.59242	0.277027	4	33.155	6.03117e-05
SiJWG07ADT_pcr_1	-1.7666	-1.77134	-2.52016	-2.52674	-2.14621	0.435611	4	9.85379	0.00222223		SiJWD07BDM_pcr_1	4.8033	4.60772	4.50945	4.48191	4.60059	0.145525	4	63.2273	8.71696e-06
SiJWD11BAT_pcr_1	-2.4838	-2.59779	-1.7187	-1.78208	-2.14559	0.459437	4	9.3401	0.00259883		SiJWB06AAC_pcr_2	3.93222	3.76508	4.62977	6.08079	4.60196	1.05461	4	8.7273	0.0031672
SiJWA02MAA_pcr_1	-2.64504	-2.60901	-1.63616	-1.68461	-2.14371	0.558632	4	7.67484	0.00459554		SiJWC05BDC_pcr_1	4.47354	4.67191	4.77547	4.5095	4.60761	0.141318	4	65.2092	7.94651e-06
SiJWD11ABC_pcr_2	-1.71797	-1.57476	-2.54795	-2.72269	-2.14084	0.578374	4	7.40297	0.00509841		SiJWG07ACM_pcr_2	3.26884	4.44594	4.75296	5.96942	4.60929	1.10967	4	8.30753	0.00365471
SiJWG05AA1_pcr_1	-1.98565	-1.6176	-2.52525	-2.42847	-2.13924	0.419664	4	10.195	0.00201124		SiJWC05BCB_pcr_1	4.1597	3.9747	5.12382	5.18193	4.61004	0.631797	4	14.5934	0.000697761
SiJWG04ADR_pcr_1	-1.69831	-1.40486	-2.63669	-2.7994	-2.13482	0.687248	4	6.21265	0.00840517		SiJWF12AAH_pcr_2	3.41018	4.02969	5.14437	5.85931	4.61089	1.09889	4	8.39191	0.00354913
SiJWE04ACQ_pcr_2	-2.20417	-2.74828	-1.74703	-1.83889	-2.13459	0.454274	4	9.39783	0.00255249		SiJWB05ABG_pcr_2	4.03585	4.10338	5.13305	5.2131	4.62135	0.638518	4	14.4752	0.000714798
SiJWC12ACY_pcr_1	-2.05944	-1.95956	-2.28458	-2.22949	-2.13327	0.150309	4	28.385	9.59986e-05		SiJWB03ADF_pcr_1	4.43372	4.46947	4.51318	5.07314	4.62238	0.30226	4	30.5855	7.67815e-05
SiJWB10ACY_pcr_1	-1.98123	-2.08292	-2.33648	-2.12802	-2.13216	0.149409	4	28.5413	9.44348e-05		SiJWB05ACB_pcr_2	4.21058	4.37824	5.04665	4.87204	4.62688	0.396417	4	23.3435	0.000172231
SiJWB12AAA_pcr_2	-1.46658	-1.83095	-2.58479	-2.64353	-2.13146	0.577379	4	7.38323	0.0051377		SiJWH06ABM_pcr_2	4.18979	4.07405	5.00824	5.23815	4.62756	0.581877	4	15.9056	0.000540348
SiJWG01CAD_pcr_1	-1.7329	-2.18013	-2.2836	-2.32709	-2.13093	0.272417	4	15.6446	0.000567578		SiJWE06ADF_pcr_1	3.68009	3.15212	5.61465	6.09321	4.63502	1.43723	4	6.44994	0.00755864
SiJWH12BDU_pcr_1	-3.27339	-3.17188	-1.08079	-0.993672	-2.12993	1.26293	4	3.37301	0.0433144		SiJWG08BDH_pcr_1	3.64959	3.95325	5.33934	5.6567	4.64972	0.995807	4	9.3386	0.00260005
SiJWA05BCN_pcr_1	-0.113962	-0.196736	-4.2919	-3.91312	-2.12893	2.28438	4	1.8639	0.159213		SiJWA04ACJ_pcr_2	4.74941	4.49786	4.71986	4.63288	4.65	0.112844	4	82.4143	3.9376e-06
SiJWA08CAG_pcr_1	-2.17512	-2.48478	-1.86435	-1.98696	-2.1278	0.270131	4	15.7538	0.000555965		SiJWB11BAT_pcr_1	4.12892	4.52047	4.71479	5.23654	4.65018	0.460626	4	20.1907	0.000265579
SiJWG07CAG_pcr_1	-1.37615	-1.56942	-2.71345	-2.84567	-2.12617	0.7605	4	5.59152	0.0112981		SiJWA06AAS_pcr_2	4.93496	4.80932	4.64052	4.23634	4.65529	0.304235	4	30.6032	7.66486e-05
SiJWF05BDB_pcr_1	-2.2488	-2.29435	-2.10572	-1.8542	-2.12577	0.198083	4	21.4634	0.000221305		SiJWF05BAM_pcr_1	3.50028	3.64427	5.47733	6.00605	4.65698	1.27233	4	7.32038	0.00526548
SiJWG07CAL_pcr_1	-1.4643	-2.04299	-2.54722	-2.43499	-2.12237	0.489074	4	8.67915	0.00321857		SiJWG04BAJ_pcr_2	4.01006	3.99449	5.12327	5.52038	4.66205	0.778929	4	11.9704	0.00125412
SiJWB07CAJ_pcr_1	-1.74506	-2.52686	-1.92619	-2.29103	-2.12228	0.352569	4	12.039	0.00123316		SiJWH05BAN_pcr_1	4.37347	4.80107	4.5859	4.94007	4.67513	0.248339	4	37.6511	4.12131e-05
SiJWG03AAB_pcr_2	-1.27938	-1.35442	-4.17916	-1.6754	-2.12209	1.38209	4	3.07083	0.0545267		SiJWH11BDM_pcr_1	3.41183	3.65334	6.0179	5.70381	4.69672	1.35392	4	6.93793	0.00614069
SiJWE12AAX_pcr_2	-2.53477	-2.27738	-1.62705	-2.04879	-2.122	0.385077	4	11.0212	0.0015998		SiJWH12AAZ_pcr_1	3.95138	3.47822	5.68778	5.68827	4.70141	1.1555	4	8.13743	0.0038805
SiJWE03BAQ_pcr_1	-2.2292	-2.56204	-1.71585	-1.97393	-2.12026	0.361479	4	11.731	0.00133113		SiJWF10BCO_pcr_1	4.76316	4.3719	4.84002	4.88302	4.71452	0.233738	4	40.3403	3.35192e-05
SiJWE01ADP_pcr_1	-1.74485	-1.45211	-2.62475	-2.64899	-2.11768	0.611392	4	6.92739	0.00616743		SiJWH07BDX_pcr_1	4.37067	4.37146	4.78823	5.33093	4.71532	0.455089	4	20.7227	0.000245756
SiJWE06BCP_pcr_1	-1.16669	-0.687453	-3.41074	-3.20199	-2.11672	1.39016	4	3.04528	0.0556349		SiJWE01BCV_pcr_1	3.75974	3.58139	5.78148	5.79813	4.73019	1.22573	4	7.71816	0.00452154
SiJWD02AAY_pcr_1	-1.93338	-2.0575	-2.20869	-2.25618	-2.11393	0.147193	4	28.7232	9.26572e-05		SiJWD01ADD_pcr_1	4.17479	4.31987	5.04195	5.4061	4.73568	0.586164	4	16.1582	0.000515627
SiJWG08BAH_pcr_2	-1.43935	-1.32961	-2.85121	-2.83422	-2.1136	0.843131	4	5.01369	0.0152774		SiJWE08BEA_pcr_1	4.67047	4.42839	5.28282	4.56884	4.73763	0.376769	4	25.1488	0.000137865
SiJWC03BCD_pcr_1	-2.4054	-2.60736	-1.75458	-1.68641	-2.11344	0.462001	4	9.14906	0.0027604		SiJWC06AAB_pcr_1	3.90092	3.69501	5.45135	5.9134	4.74017	1.10739	4	8.56095	0.00334944
SiJWF11CAT_pcr_1	-1.61993	-1.47773	-2.53213	-2.82272	-2.11313	0.664844	4	6.35677	0.00787704		SiJWH02BDQ_pcr_1	4.49014	4.66412	4.62168	5.19767	4.7434	0.311773	4	30.4286	7.79721e-05
SiJWA03ADL_pcr_1	-2.34009	-2.63789	-1.75074	-1.71841	-2.11178	0.452402	4	9.33586	0.00260228		SiJWC01CAM_pcr_1	4.81082	5.20167	4.54222	4.42597	4.74517	0.344373	4	27.5583	0.000104871
SiJWF12BCO_pcr_1	-1.97031	-1.99672	-2.08887	-2.38326	-2.10979	0.189264	4	22.2947	0.000197574		SiJWA10AAT_pcr_2	4.6831	4.60234	4.8692	4.82617	4.7452	0.124095	4	76.477	4.92733e-06
SiJWG07CAG_pcr_1	-1.26752	-1.55097	-2.77961	-2.83667	-2.10869	0.816234	4	5.16688	0.0140642		SiJWF10ADB_pcr_1	4.64075	4.88039	4.53619	4.93168	4.74725	0.18941	4	50.1268	1.7484e-05
SiJWE06BDT_pcr_1	-1.75515	-1.80074	-2.49055	-2.38795	-2.1086	0.384545	4	10.9667	0.00162327		SiJWH07BCU_pcr_1	5.24233	4.25641	4.77605	4.72527	4.75002	0.403037	4	23.5711	0.00016731
SiJWA03ABM_pcr_2	-3.13949	-3.41889	-0.965086	-0.908174	-2.10791	1.35748	4	3.10563	0.053062		SiJWD04AAJ_pcr_2	4.62065	4.86628	4.77879	4.7657	4.75786	0.101783	4	93.4901	2.69771e-06
SiJWH02BCF_pcr_1	-1.06441	-0.958003	-3.25191	-3.15408	-2.1071	1.2668	4	3.32664	0.0448314		SiJWH08AAH_pcr_2	4.26049	4.25156	5.14422	5.38345	4.75993	0.590012	4	16.135	0.000517832
SiJWD01BAU_pcr_1	-2.38175	-1.98207	-2.00906	-2.04828	-2.10529	0.1863	4	22.6011	0.000189684		SiJWB11ABT_pcr_2	3.08509	3.34838	5.92265	6.70722	4.76583	1.82038	4	5.2361	0.0135572
SiJWH05ACI_pcr_2	-2.17312	-2.78667	-1.60836	-1.84653	-2.10367	0.510806	4	8.23668	0.00374659		SiJWB07ABZ_pcr_2	4.31354	4.74163	4.82876	5.23021	4.77853	0.375992	4	25.4183	0.000133542
SiJWA10BAW_pcr_1	-0.816956	-1.17754	-3.26294	-3.15698	-2.1036	1.28669	4	3.26979	0.0467845		SiJWC01BDZ_pcr_1	3.60401	6.02485	4.76117	4.73663	4.78167	0.989078	4	9.66894	0.00234887
SiJWD12ACO_pcr_2	-1.94038	-1.81617	-2.15442	-2.50279	-2.10344	0.300663	4	13.992	0.000790495		SiJWA10BCA_pcr_1	4.24043	4.08698	5.43202	5.39482	4.78856	0.724395	4	13.2209	0.000935014
SiJWB11AAA_pcr_1	-1.46507	-1.92614	-2.46706	-2.5482	-2.10162	0.506283	4	8.30215	0.00366158		SiJWA11ACZ_pcr_1	4.8992	4.999	4.72915	4.57867	4.8015	0.185685	4	51.7166	1.5922e-05
SiJWF04ACO_pcr_2	-1.66043	-1.81176	-2.33793	-2.58678	-2.09922	0.435838	4	9.63305	0.00237455		SiJWG10ABN_pcr_2	4.36511	4.20585	5.24258	5.39689	4.80261	0.603952	4	15.904	0.000540515
SiJWC07ADR_pcr_1	-1.62182	-1.70492	-2.52974	-2.53428	-2.09769	0.502656	4	8.34642	0.00360554		SiJWE07ACV_pcr_2	4.59892	4.71339	4.93879	4.96156	4.80316	0.176314	4	54.4843	1.36185e-05
SiJWB04ABI_pcr_2	-2.18476	-2.14283	-2.08402	-1.97543	-2.09676	0.0908291	4	46.1693	2.23706e-05		SiJWE01BDK_pcr_1	3.32692	3.46894	6.00729	6.41088	4.80351	1.63239	4	5.88523	0.00979008
SiJWH03ADU_pcr_1	-2.19687	-2.18327	-2.05622	-1.94718	-2.09588	0.117645	4	35.6305	4.86153e-05		SiJWA07AAM_pcr_2	4.50407	4.84024	4.55435	5.32746	4.80653	0.377526	4	25.4633	0.000132837
SiJWD06BDE_pcr_1	-1.66609	-2.05086	-2.22006	-2.44635	-2.09584	0.329135	4	12.7354	0.00104442		SiJWH08BAL_pcr_1	4.94796	4.52071	4.82716	4.93382	4.80741	0.198594	4	48.4146	1.94033e-05
SiJWG06BAP_pcr_1	-1.27832	-1.57693	-2.73208	-2.79178	-2.09478	0.78033	4	5.36896	0.012649		SiJWA04ACG_pcr_2	4.27315	4.40623	5.53822	5.03612	4.81343	0.586695	4	16.4086	0.000492581
SiJWF07ACQ_pcr_2	-2.64862	-2.13998	-1.74344	-1.84674	-2.0947	0.405688	4	10.3266	0.00193698		SiJWC03BCG_pcr_1	4.1884	4.11277	5.50102	5.47412	4.81908	0.772602	4	12.4749	0.0011102
SiJWE09BAU_pcr_1	-1.09367	-1.04233	-3.14149	-3.10015	-2.09441	1.1855	4	3.53337	0.038546		SiJWH12BDI_pcr_1	5.44474	5.69244	4.254	3.91086	4.82551	0.875256	4	11.0265	0.00159751
SiJWA08CAG_pcr_1	-2.07054	-2.64929	-1.82387	-1.83072	-2.09361	0.387805	4	10.7972	0.00169935		SiJWA02BAU_pcr_1	4.32818	4.41607	5.00564	5.58661	4.83413	0.584922	4	16.5291	0.00048198
SiJWA04BBK_pcr_1	-2.86364	-2.51004	-1.39985	-1.60007	-2.0934	0.705038	4	5.93839	0.00954584		SiJWG07ACR_pcr_2	4.82729	4.82915	4.62428	5.06091	4.83541	0.17845	4	54.1933	1.38389e-05
SiJWB04BDC_pcr_1	-1.36707	-1.2652	-2.8203	-2.91459	-2.09179	0.897441	4	4.66168	0.0186294		SiJWD03BEA_pcr_2	4.18479	4.32049	5.22211	5.62603	4.83836	0.698338	4	13.8568	0.000813583
SiJWE02CAN_pcr_1	-1.93666	-1.70863	-2.32223	-2.39889	-2.09161	0.325724	4	12.8428	0.0010188		SiJWH12AAY_pcr_2	3.65231	3.24	5.66264	6.80181	4.83919	1.68286	4	5.75116	0.0104435
SiJWA03BAK_pcr_2	-1.98607	-1.97303	-2.30147	-2.10491	-2.09137	0.152117	4	27.497	0.000105573		SiJWC05ADT_pcr_1	4.15485	4.30978	5.41965	5.47259	4.83922	0.703973	4	13.7483	0.000832748
SiJWA12AAN_pcr_2	-0.768262	-0.797808	-3.30538	-3.49215	-2.0909	1.51216	4	2.76544	0.069834		SiJWE06ACB_pcr_2	4.85094	4.76653	4.76018	4.98109	4.83968	0.102946	4	94.024	2.65203e-06
SiJWA12BDK_pcr_1	-2.17175	-2.4143	-1.68972	-2.08371	-2.08987	0.301174	4	13.8781	0.000809877		SiJWF03BBV_pcr_1	4.50107	4.0741	5.24525	5.57879	4.8498	0.685843	4	14.1426	0.000765809
SiJWA02BBZ_pcr_1	-2.35392	-1.52974	-2.48104	-1.98928	-2.08849	0.426847	4	9.78568	0.00226781		SiJWH09ABN_pcr_2	4.12639	4.08742	5.57652	5.65712	4.86186	0.872512	4	11.1445	0.00154825
SiJWF05CAS_pcr_1	-2.61195	-2.49484	-1.54608	-1.69838	-2.08781	0.543301	4	7.68566	0.00457691		SiJWH06BCM_pcr_1	4.15397	4.59361	5.23082	5.49529	4.86842	0.608351	4	16.0053	0.000530406
SiJWF02ABA_pcr_2	-0.526451	-0.437425	-3.65339	-3.72855	-2.08645	1.85335	4	2.25155	0.10978		SiJWC09BCZ_pcr_1	3.84713	3.95163	6.08743	5.62035	4.87663	1.14523	4	8.51643	0.00340056
SiJWA07CAG_pcr_1	-1.52639	-1.33729	-2.29772	-3.17526	-2.08416	0.83766	4	4.97616	0.0155953		SiJWC01ACL_pcr_2	4.51794	4.31443	5.48318	5.19223	4.87695	0.551434	4	17.6882	0.000393951
SiJWD03AAR_pcr_2	-1.55938	-1.50566	-2.58808	-2.68291	-2.08401	0.638353	4	6.52933	0.00730056		SiJWC10ADQ_pcr_1	3.87593	3.83326	5.84569	5.96211	4.87925	1.18425	4	8.24023	0.00374191
SiJWA03BDS_pcr_1	-1.5497	-1.33481	-2.83681	-2.61286	-2.08354	0.751261	4	5.54678	0.0115539		SiJWF01BDH_pcr_1	4.13305	4.37858	5.12751	5.88867	4.88195	0.793312	4	12.3078	0.00115533
SiJWH05BBD_pcr_1	-2.14117	-2.18055	-2.31515	-1.69297	-2.08246	0.270131	4	15.4181	0.000592703		SiJWG06ACS_pcr_1	4.68939	4.3444	5.39363	5.10784	4.88381	0.46147	4	21.1664	0.000230703
SiJWF04ACP_pcr_2	-1.39358	-1.86281	-2.63917	-2.43398	-2.08238	0.564592	4	7.37659	0.00515101		SiJWA09BBL_pcr_1	4.77993	4.33793	5.00865	5.43614	4.89067	0.457981	4	21.3575	0.000224596
SiJWH03BDJ_pcr_1	-1.9636	-1.70166	-2.28361	-2.37963	-2.08212	0.309789	4	13.4422	0.000890168		SiJWB06ADA_pcr_1	5.41908	5.18773	4.69906	4.26062	4.89163	0.516766	4	18.9317	0.000321778
SiJWC09BDC_pcr_1	-2.09328	-2.65422	-1.68834	-1.87985	-2.07892	0.417674	4	9.95475	0.00215687		SiJWE08AAU_pcr_2	4.29857	4.37362	5.36125	5.55474	4.89705	0.653248	4	14.9929	0.000644023
SiJWB07BDK_pcr_1	-2.10245	-2.10915	-1.38269	-2.72074	-2.07876	0.547153	4	7.59846	0.00472995		SiJWF05BAH_pcr_2	4.64091	4.90152	4.75189	5.29755	4.89797	0.286994	4	34.1329	5.52854e-05
SiJWE05BBS_pcr_1	-2.21937	-2.58063	-1.74804	-1.76555	-2.0784	0.399633	4	10.4015	0.00189633		SiJWE02BCO_pcr_1	4.34215	4.04065	5.56086	5.65896	4.90065	0.829143	4	11.821	0.00130146
SiJWB05ADE_pcr_1	-1.17945	-1.5233	-2.74622	-2.84157	-2.07263	0.845485	4	4.90283	0.0162417		SiJWD03ABI_pcr_2	4.581	4.96516	4.87148	5.19653	4.90354	0.254753	4	38.4964	3.85617e-05
SiJWG11BDV_pcr_1	-2.02773	-2.1827	-1.94257	-2.13733	-2.07258	0.108371	4	38.2498	3.93111e-05		SiJWD12ADH_pcr_1	4.76669	4.42353	5.13798	5.30366	4.90796	0.393326	4	24.9562	0.000141069
SiJWH06ACO_pcr_2	-1.6875	-1.86334	-2.29123	-2.44694	-2.07225	0.355909	4	11.6448	0.00136038		SiJWD12AAM_pcr_2	4.25365	3.991	5.53937	5.85169	4.90893	0.92344	4	10.6318	0.00177823
SiJWB10AAO_pcr_2	-0.65101	-0.632027	NA	-4.93312	-2.07205	2.47777	3	1.44844	0.284491		SiJWH03ACU_pcr_2	4.51016	4.75719	5.00145	5.37357	4.91059	0.368096	4	26.6811	0.000115523
SiJWH10AAQ_pcr_2	-1.67825	-2.04122	-2.00331	-2.5621	-2.07122	0.365557	4	11.3319	0.00147409		SiJWA02BDE_pcr_1	4.9469	4.53954	5.3072	4.85976	4.91335	0.315618	4	31.1348	7.27986e-05
SiJWF09BCR_pcr_1	-1.72771	-1.51199	-2.64678	-2.39748	-2.07099	0.538035	4	7.69835	0.00455518		SiJWC10BDZ_pcr_1	3.37622	3.18984	6.68448	6.42751	4.91951	1.89409	4	5.1946	0.0138583
SiJWB01BBJ_pcr_1	-2.13652	-2.69588	-1.73079	-1.71792	-2.07028	0.460135	4	8.99856	0.00289716		SiJWE12BBA_pcr_1	4.61657	4.88575	5.11241	5.09121	4.92649	0.230512	4	42.7438	2.81836e-05
SiJWB02CAO_pcr_1	-1.62567	-1.74291	-2.56604	-2.34383	-2.06962	0.456602	4	9.06529	0.00283544		SiJWE04AAC_pcr_2	4.37716	4.18615	5.36764	5.78847	4.92986	0.77189	4	12.7735	0.00103525
SiJWC01AAI_pcr_2	-1.74693	-1.364	-2.63904	-2.52762	-2.0694	0.615368	4	6.72572	0.00671008		SiJWB12CAX_pcr_1	3.36386	3.67484	6.42672	6.2655	4.93273	1.63828	4	6.02183	0.0091784
SiJWA11BCU_pcr_1	-2.06916	-1.99549	-2.10677	-2.10471	-2.06903	0.051977	4	79.6134	4.36784e-06		SiJWG11BAB_pcr_1	4.72002	4.74771	5.15027	5.16513	4.94578	0.245038	4	40.3675	3.34517e-05
SiJWH07ADL_pcr_1	-1.8377	-1.90202	-2.3012	-2.23204	-2.06824	0.232291	4	17.8073	0.000386158		SiJWC01BCY_pcr_1	4.80281	4.50701	5.02511	5.47323	4.95204	0.407145	4	24.3257	0.000152279
SiJWE02ACE_pcr_2	-1.0841	-1.28653	-2.91351	-2.9855	-2.06741	1.02233	4	4.04453	0.0272075		SiJWH07BBS_pcr_1	4.60888	5.18176	4.93324	5.09782	4.95542	0.253038	4	39.1674	3.66167e-05
SiJWG11CAC_pcr_1	-2.42095	-2.8486	-1.46006	-1.53316	-2.06569	0.680576	4	6.07043	0.00897289		SiJWF01BAA_pcr_2	7.36673	4.53971	3.8065	4.11251	4.95636	1.6348	4	6.06356	0.00900155
SiJWH05ABX_pcr_2	-1.44239	-1.2644	-2.85417	-2.68133	-2.06057	0.822837	4	5.00846	0.0153213		SiJWD08AAV_pcr_2	5.10153	4.92803	4.663	5.14219	4.95869	0.217906	4	45.5122	2.33525e-05
SiJWG06BBP_pcr_1	-2.42492	-2.45879	-1.66079	-1.69586	-2.06009	0.441274	4	9.33701	0.00260134		SiJWG11ACO_pcr_2	3.6634	3.67746	6.20575	6.31331	4.96498	1.49547	4	6.64001	0.00695973
SiJWA08ADW_pcr_1	-1.40309	-2.0444	-2.22087	-2.57182	-2.06004	0.489767	4	8.41235	0.00352416		SiJWG09ADF_pcr_1	4.52785	4.87774	5.44465	5.0195	4.96743	0.379352	4	26.189	0.000122134
SiJWC08ACL_pcr_2	-2.56831	-2.79226	-1.4584	-1.41935	-2.05958	0.722713	4	5.69958	0.01071		SiJWF04BAB_pcr_1	4.43756	4.5853	5.21404	5.63398	4.96772	0.557342	4	17.8265	0.000384925
SiJWE07BAM_pcr_1	-2.37961	-2.04263	-1.95436	-1.85605	-2.05816	0.227447	4	18.098	0.000367982		SiJWA01BCF_pcr_1	3.52442	4.053	5.02668	7.28014	4.97106	1.66038	4	5.98788	0.00932565
SiJWC07CAW_pcr_1	NA	-1.92309	-2.12595	-2.12457	-2.05787	0.116725	3	30.5361	0.00107072		SiJWG09ACT_pcr_2	4.19102	4.17965	5.72841	5.79145	4.97263	0.909469	4	10.9352	0.00163705
SiJWF10ACU_pcr_2	-1.54015	-1.40644	-2.7584	-2.51888	-2.05597	0.682072	4	6.0286	0.00914942		SiJWB04BAH_pcr_2	4.84978	5.65881	4.8505	4.54672	4.97645	0.476864	4	20.8716	0.000240561
SiJWF03ADB_pcr_1	-1.84342	-1.75665	-2.39702	-2.212	-2.05227	0.30297	4	13.5477	0.000869804		SiJWA11CAI_pcr_1	3.29865	3.0968	6.46963	7.05143	4.97913	2.0723	4	4.80542	0.0171553
SiJWC06ACE_pcr_2	-1.77183	-1.87684	-2.43029	-2.12143	-2.0501	0.292738	4	14.0064	0.000788103		SiJWF05ADI_pcr_1	4.73698	4.93132	5.12193	5.15626	4.98662	0.193622	4	51.5089	1.61152e-05
SiJWG06BCE_pcr_1	-1.46674	-1.46452	-2.51748	-2.74978	-2.04963	0.680983	4	6.01962	0.0091879		SiJWH09ABR_pcr_2	4.85017	4.89979	4.76108	5.44763	4.98967	0.310653	4	32.1237	6.62948e-05
SiJWF07BCS_pcr_1	-1.09934	-1.34037	-2.91401	-2.83896	-2.04817	0.961996	4	4.25817	0.0237497		SiJWD08ABV_pcr_2	5.13142	5.31346	4.76548	4.75978	4.99254	0.275687	4	36.2189	4.62888e-05
SiJWA01BDQ_pcr_1	-1.88989	-1.80518	-1.96279	-2.52989	-2.04694	0.328346	4	12.4682	0.00111197		SiJWA06ABK_pcr_2	4.88688	4.61763	5.46305	5.02318	4.99768	0.353051	4	28.3114	9.67477e-05
SiJWG10BAB_pcr_1	-1.61832	-1.40437	-3.47941	-1.68499	-2.04677	0.962562	4	4.25276	0.02383		SiJWB12CAU_pcr_1	4.72882	5.05567	5.16424	5.09177	5.01012	0.192892	4	51.9475	1.57108e-05
SiJWE06BDJ_pcr_1	-1.54659	-1.42782	-2.76762	-2.43417	-2.04405	0.659027	4	6.20324	0.00844126		SiJWG11BCD_pcr_1	3.70162	4.32927	5.91385	6.13939	5.02103	1.19265	4	8.41996	0.00351492
SiJWB05BBK_pcr_1	-2.14777	-2.0213	-2.24932	-1.75416	-2.04314	0.214042	4	19.091	0.000313842		SiJWG06CAC_pcr_1	4.68234	4.60423	5.54096	5.34057	5.04202	0.468723	4	21.5139	0.000219759
SiJWB12BDJ_pcr_1	-2.2521	-2.31024	-1.8504	-1.7546	-2.04183	0.280121	4	14.5782	0.000699922		SiJWA12BCZ_pcr_1	4.58665	4.665	5.42839	5.48861	5.04216	0.482435	4	20.9029	0.000239487
SiJWE05BCF_pcr_1	-1.94155	-1.6863	-2.23614	-2.30274	-2.04168	0.284188	4	14.3685	0.000730655		SiJWE09ABK_pcr_2	3.87981	3.85388	6.09886	6.36595	5.04963	1.37014	4	7.37096	0.00516232
SiJWG10ACS_pcr_2	-1.46931	-1.60831	-2.66802	-2.41771	-2.04084	0.591356	4	6.90222	0.00623192		SiJWD06BBS_pcr_1	4.56873	4.60056	4.98334	6.0732	5.05646	0.703524	4	14.3747	0.000729732
SiJWC06ADR_pcr_1	-2.12809	-2.1362	-1.95009	-1.94489	-2.03982	0.106682	4	38.241	3.93382e-05		SiJWF01ACQ_pcr_2	5.47522	5.26365	4.66551	4.82244	5.0567	0.376782	4	26.8415	0.000113471
SiJWC10AAC_pcr_2	-0.668127	-0.501844	-3.56769	-3.41826	-2.03898	1.68141	4	2.42533	0.093721		SiJWG09BCT_pcr_1	4.62435	4.30495	5.74527	5.56766	5.06056	0.704083	4	14.3749	0.000729697
SiHNG04w01me_pcr_1	-1.48428	-1.62443	-2.88608	-2.15662	-2.03785	0.635337	4	6.41502	0.00767594		SiJWC09ACU_pcr_2	5.03157	5.00127	5.01714	5.21322	5.0658	0.0990565	4	102.281	2.06032e-06
SiJWE03ABC_pcr_2	-1.42362	-1.62695	-2.56814	-2.52977	-2.03712	0.59702	4	6.8243	0.00643731		SiJWE08BAQ_pcr_1	4.85074	4.86065	5.23311	5.34699	5.07287	0.25508	4	39.7748	3.49671e-05
SiJWH07ADF_pcr_1	-1.63765	-1.53178	-2.52118	-2.45725	-2.03696	0.52465	4	7.76503	0.00444324		SiJWG02BCL_pcr_1	4.15775	4.57012	6.23117	5.33858	5.0744	0.91332	4	11.112	0.00156162
SiJWD11ADU_pcr_1	-1.69836	-1.96062	-2.29647	-2.17679	-2.03306	0.262877	4	15.4677	0.000587075		SiJWC06ACT_pcr_2	4.70581	4.83399	5.30203	5.46481	5.07666	0.364172	4	27.8805	0.000101288
SiJWE01ACJ_pcr_2	-2.21153	-2.3928	-1.81398	-1.70411	-2.0306	0.325292	4	12.4848	0.00110761		SiJWA04ACS_pcr_1	4.63776	4.50705	5.82743	5.36827	5.08513	0.623296	4	16.3169	0.000500861
SiJWC10BCT_pcr_1	-2.01555	-2.36149	-1.86515	-1.87923	-2.03035	0.23094	4	17.5834	0.000400985		SiJWE04AAC_pcr_1	4.92296	4.47259	5.41022	5.53632	5.08552	0.486747	4	20.896	0.000239726
SiJWF10BAZ_pcr_1	-2.34948	-2.37081	-1.72858	-1.67163	-2.03013	0.381881	4	10.6323	0.00177801		SiJWH01BDH_pcr_1	3.64496	3.90441	6.15082	6.65972	5.08998	1.53657	4	6.62513	0.00700434
SiJWD01ACM_pcr_2	-1.75695	-1.38735	-2.48841	-2.48164	-2.02859	0.548232	4	7.40048	0.00510335		SiJWF03AAJ_pcr_2	5.45105	5.44546	4.73977	4.7389	5.09379	0.409304	4	24.89	0.000142192
SiJWE09BAM_pcr_1	-1.90195	-1.55755	-2.44762	-2.19648	-2.0259	0.383694	4	10.56	0.001814		SiJWA03ABP_pcr_2	3.0335	3.02812	7.28447	7.03696	5.09576	2.38654	4	4.27042	0.0235691
SiJWG12BDK_pcr_1	-1.39137	-1.42088	-2.67302	-2.61643	-2.02543	0.715583	4	5.66092	0.0109157		SiJWB12BCX_pcr_1	NA	5.22663	4.69856	5.36559	5.09693	0.351926	3	25.0852	0.00158537
SiJWB03CAW_pcr_1	-0.811364	-1.52647	-2.93524	-2.82287	-2.02399	1.03063	4	3.92768	0.0293752		SiJWA06ABJ_pcr_2	5.12846	4.70778	5.03165	5.56605	5.10849	0.354137	4	28.8503	9.14415e-05
SiJWB09BCJ_pcr_1	-1.04507	-1.38051	-2.42244	-3.24653	-2.02363	1.00428	4	4.03003	0.0274649		SiJWG06ACS_pcr_2	4.99639	5.42578	5.09422	4.93972	5.11403	0.217411	4	47.0447	2.11462e-05
SiJWF09BCC_pcr_1	-1.42818	-1.59962	-2.40976	-2.65539	-2.02324	0.60071	4	6.73615	0.00668051		SiJWG12BCK_pcr_1	3.79063	4.16105	6.81804	5.6998	5.11738	1.40312	4	7.29426	0.0053198
SiJWB07BBE_pcr_1	-1.61387	-2.24818	-2.0531	-2.17614	-2.02282	0.284285	4	14.2309	0.000751805		SiJWE02BBC_pcr_1	4.24097	4.16989	6.2066	5.88639	5.12597	1.07134	4	9.56925	0.00242115
SiJWD03BDH_pcr_1	-3.60299	-0.440579	-2.05316	-1.99228	-2.02225	1.29129	4	3.13215	0.0519788		SiJWG11BCN_pcr_1	4.70673	4.66395	5.48917	5.65136	5.1278	0.515479	4	19.8953	0.000277514
SiJWD06BBE_pcr_1	-1.27872	-1.0832	-2.74928	-2.97641	-2.0219	0.978715	4	4.13175	0.0257221		SiJWC01BAD_pcr_1	4.46404	4.39695	5.71281	5.95252	5.13158	0.815898	4	12.579	0.00108328
SiJWE11BDB_pcr_1	-1.55399	-1.57884	-2.47681	-2.46754	-2.0193	0.523055	4	7.72117	0.00451647		SiJWB10CAG_pcr_1	3.78971	3.16732	6.77464	6.79855	5.13255	1.92677	4	5.32762	0.0129228
SiJWH06ABT_pcr_2	-2.22259	-2.5703	-1.77903	-1.49873	-2.01766	0.473867	4	8.51573	0.00340137		SiJWD08AAI_pcr_2	5.02894	4.67529	5.36827	5.45858	5.13277	0.356689	4	28.7801	9.21107e-05
SiJWH08ADW_pcr_1	-0.997072	-1.3845	-3.0652	-2.62108	-2.01696	0.983858	4	4.10011	0.0262486		SiJWG01BBR_pcr_1	5.09364	4.2602	5.37359	5.81573	5.13579	0.655055	4	15.6805	0.000563729
SiJWF02ADK_pcr_1	-1.7101	-1.8432	-2.40514	-2.10941	-2.01696	0.307452	4	13.1205	0.000956342		SiJWG02AAR_pcr_2	5.29437	5.02921	5.08301	5.15191	5.13962	0.114735	4	89.5911	3.06536e-06
SiJWE10ABH_pcr_2	-1.81429	-2.00032	-2.13058	-2.11898	-2.01604	0.146818	4	27.4631	0.000105963		SiJWG10BCS_pcr_1	4.52453	4.69692	5.54913	5.79035	5.14023	0.623289	4	16.4939	0.000485048
SiJWB12ADV_pcr_1	-1.78222	-1.87581	-2.10297	-2.30271	-2.01593	0.233861	4	17.2404	0.000425201		SiJWB04BAG_pcr_2	4.49877	4.44667	5.87188	5.75328	5.14265	0.775375	4	13.2649	0.00092585
SiJWF02AAY_pcr_1	-2.3749	-2.41034	-1.59505	-1.68112	-2.01535	0.437282	4	9.21763	0.00270092		SiJWA08ADI_pcr_1	4.813	5.22271	5.38661	5.14961	5.14298	0.241277	4	42.6313	2.84069e-05
SiJWC01ADY_pcr_newprimers	-1.34312	-1.66879	-2.57703	-2.46573	-2.01367	0.602857	4	6.68041	0.00684057		SiJWA07CAP_pcr_1	4.71353	4.62714	5.43603	5.82777	5.15111	0.578812	4	17.7989	0.000386701
SiJWG04CAU_pcr_1	-1.74749	-1.60248	-2.53587	-2.16805	-2.01347	0.422868	4	9.52293	0.00245574		SiJWA07BAV_pcr_1	4.04495	4.70563	5.66567	6.21213	5.1571	0.968237	4	10.6526	0.00176807
SiJWB02ABW_pcr_2	-2.12458	-1.94915	-1.85315	-2.1227	-2.01239	0.134304	4	29.9677	8.16151e-05		SiJWH04ABW_pcr_2	5.38062	5.46293	4.98984	4.81001	5.16085	0.311921	4	33.0907	6.06632e-05
SiJWH10BCP_pcr_1	-2.04111	-1.96814	-2.06868	-1.96984	-2.01194	0.0508617	4	79.1142	4.45101e-06		SiJWB08BAO_pcr_1	4.38083	4.09931	6.06873	6.10193	5.1627	1.07163	4	9.63527	0.00237296
SiJWG08BAX_pcr_1	-0.593593	-0.809582	-3.41844	-3.22396	-2.0114	1.51708	4	2.65166	0.0768845		SiJWB03BDV_pcr_1	3.74797	3.84499	5.9397	7.12898	5.16541	1.65406	4	6.24572	0.00827995
SiJWC03ADY_pcr_1	-1.33329	-1.65262	-2.55802	-2.49633	-2.01006	0.611692	4	6.57215	0.00716615		SiJWD10ADG_pcr_1	4.16995	4.51286	5.83537	6.14864	5.16671	0.971654	4	10.6349	0.00177673
SiJWF03BAN_pcr_1	-1.04458	-1.53701	-2.68401	-2.77368	-2.00982	0.855035	4	4.70114	0.0182089		SiJWB08ABH_pcr_2	4.54327	4.42909	5.54098	6.15865	5.16799	0.828006	4	12.483	0.00110808
SiJWH01ACA_pcr_2	-4.25716	-2.27711	-0.467252	-1.02703	-2.00714	1.68001	4	2.38943	0.096791		SiJWC08BCG_pcr_1	5.03468	4.81857	5.2757	5.57086	5.17495	0.323303	4	32.0131	6.69832e-05
SiJWC04ACL_pcr_2	-1.75482	-1.98206	-2.09681	-2.19353	-2.0068	0.188923	4	21.2447	0.000228174		SiJWH12BAQ_pcr_1	4.8445	4.91714	5.39702	5.56009	5.17969	0.352715	4	29.3704	8.66829e-05
SiJWH11BCJ_pcr_1	-2.45503	-2.97529	-1.28661	-1.30893	-2.00647	0.845494	4	4.74626	0.017743		SiJWC10BBA_pcr_1	4.4729	5.46573	5.31973	5.51914	5.19437	0.488311	4	21.2749	0.00022721
SiJWF05BBZ_pcr_1	-1.6757	-1.3667	-2.45002	-2.51754	-2.00249	0.570553	4	7.01947	0.00593886		SiJWA03ABE_pcr_2	5.09448	5.29856	5.22044	5.18116	5.19866	0.0848785	4	122.496	1.19949e-06
SiJWB03ACE_pcr_2	-1.89991	-2.0227	-2.29443	-1.7914	-2.00211	0.216577	4	18.4887	0.000345303		SiJWB11ACT_pcr_2	5.17013	5.09866	5.1614	5.37981	5.2025	0.122419	4	84.995	3.58983e-06
SiJWF04ADQ_pcr_1	-2.29958	-2.36325	-1.67577	-1.66139	-2	0.38361	4	10.4272	0.00188264		SiJWC01BAE_pcr_1	4.58628	5.09913	5.21811	5.91526	5.2047	0.547315	4	19.019	0.000317396
											SiJWE08BEA_pcr_2	5.19823	4.9673	5.05432	5.60443	5.20607	0.282132	4	36.9052	4.37582e-05
											SiJWG05BDS_pcr_1	5.06824	5.08169	5.21962	5.53783	5.22684	0.218317	4	47.8831	2.00559e-05
											SiJWA11BCF_pcr_1	4.44871	4.75229	5.64531	6.07618	5.23062	0.758755	4	13.7874	0.000825774
											SiJWH12ADF_pcr_1	5.32547	5.19965	5.18736	5.22115	5.23341	0.0629464	4	166.281	4.79606e-07
											SiJWH12ACS_pcr_1	5.23852	4.91693	5.18347	5.65219	5.24778	0.303989	4	34.5261	5.3422e-05
											SiJWA10ACW_pcr_2	4.21113	4.10825	5.78463	6.89125	5.24882	1.33696	4	7.85188	0.00430283
											SiJWE04BDJ_pcr_1	4.67746	5.1246	5.91751	5.31148	5.25776	0.514015	4	20.4576	0.000255377
											SiJWB05BAX_pcr_1	4.93542	5.65852	5.16322	5.28742	5.26114	0.302371	4	34.7992	5.21762e-05
											SiJWF02BAX_pcr_1	5.17435	4.59107	5.51969	5.79707	5.27054	0.519693	4	20.2833	0.000261981
											SiJWB05BCA_pcr_1	4.75106	4.66466	5.67182	5.99613	5.27091	0.664443	4	15.8657	0.000544403
											SiJWE03ACJ_pcr_2	4.79225	4.67432	5.61656	6.02621	5.27734	0.651871	4	16.1913	0.000512496
											SiJWE01BDJ_pcr_1	4.6516	5.2344	5.52719	5.69697	5.27754	0.458949	4	22.9984	0.000180066
											SiJWG05BAZ_pcr_1	5.36385	5.28819	5.08988	5.3736	5.27888	0.131658	4	80.191	4.27416e-06
											SiJWG06BCD_pcr_1	3.78509	3.27526	6.84079	7.24842	5.28739	2.04648	4	5.1673	0.0140611
											SiJWA08CAR_pcr_1	4.32723	4.40183	6.03003	6.41552	5.29365	1.08476	4	9.76	0.00228532
											SiJWG05ACX_pcr_1	4.86374	5.08179	5.68659	5.54752	5.29491	0.386673	4	27.3871	0.000106845
											SiJWD10BAQ_pcr_1	4.41245	4.65826	5.58958	6.52087	5.29529	0.961573	4	11.0138	0.00160294
											SiJWD09CAA_pcr_1	4.16778	3.9926	6.00796	7.04931	5.30441	1.47788	4	7.17839	0.00556995
											SiJWD01ACY_pcr_1	5.54054	5.34091	5.254	5.09864	5.30852	0.184305	4	57.6058	1.1524e-05
											SiJWA06BAJ_pcr_2	5.48887	5.16166	5.19737	5.3904	5.30957	0.156151	4	68.0058	7.0064e-06
											SiJWF01BDM_pcr_1	5.84731	3.88373	5.49865	6.02177	5.31287	0.977261	4	10.873	0.00166478
											SiJWE06AAG_pcr_2	4.84865	4.35684	5.99708	6.06129	5.31597	0.848082	4	12.5364	0.00109418
											SiJWB12ADH_pcr_1	5.12188	5.42746	5.00097	5.7305	5.3202	0.327155	4	32.524	6.38824e-05
											SiJWF11CAJ_pcr_1	4.62964	4.7911	5.58725	6.28451	5.32313	0.765505	4	13.9075	0.000804823
											SiJWC12BCG_pcr_1	4.98423	4.95109	5.6417	5.71711	5.32353	0.412301	4	25.8235	0.000127375
											SiJWH12AAY_pcr_1	4.25578	4.13438	5.85102	7.08854	5.33243	1.408	4	7.5745	0.00477319
											SiJWB10BAM_pcr_1	5.25746	4.4743	5.66644	5.93349	5.33292	0.636354	4	16.7609	0.000462428
											SiJWF02ABI_pcr_2	5.25479	4.94184	5.12691	6.03022	5.33844	0.478746	4	22.3018	0.000197387
											SiJWA02AAX_pcr_1	5.72106	5.37209	5.09844	5.16338	5.33874	0.28034	4	38.0876	3.98146e-05
											SiJWC08ACI_pcr_2	4.83333	4.87029	5.75173	5.96712	5.35562	0.58855	4	18.1994	0.000361911
											SiJWA04ACS_pcr_2	4.55173	4.88757	6.20687	5.77879	5.35624	0.767899	4	13.9504	0.000797512
											SiJWH08BBP_pcr_1	4.55223	4.60391	6.51806	5.76147	5.35892	0.953318	4	11.2427	0.0015088
											SiJWC10ABA_pcr_2	5.21318	5.23767	5.13754	5.85346	5.36046	0.331419	4	32.3486	6.49252e-05
											SiJWB06BBG_pcr_1	5.04875	5.69247	4.96625	5.74153	5.36225	0.411496	4	26.0622	0.000123919
											SiJWD01ACX_pcr_1	5.46759	5.59997	5.10729	5.28715	5.3655	0.214637	4	49.996	1.76214e-05
											SiJWH03BAG_pcr_2	5.36786	5.51309	5.19171	5.42426	5.37423	0.135569	4	79.2839	4.42248e-06
											SiJWG07CAK_pcr_1	5.72009	5.27094	4.8996	5.60977	5.3751	0.370151	4	29.0428	8.96411e-05
											SiJWG07BBV_pcr_1	4.47276	6.10334	5.13192	5.8193	5.38183	0.730483	4	14.735	0.000678057
											SiJWF12BAS_pcr_1	4.61067	5.26519	5.55497	6.10023	5.38276	0.620313	4	17.355	0.0004169
											SiJWB07CAS_pcr_1	5.99639	5.34096	5.22762	4.99449	5.38987	0.429305	4	25.1097	0.000138507
											SiJWA02BAB_pcr_1	4.54591	5.11439	5.91836	5.99004	5.39217	0.689839	4	15.6331	0.000568817
											SiJWH01CAE_pcr_1	4.51318	4.13796	6.37914	6.56561	5.39897	1.25121	4	8.63002	0.00327214
											SiJWH12ACS_pcr_2	5.6483	5.62349	5.04007	5.29349	5.40133	0.290108	4	37.2367	4.26021e-05
											SiJWE03ADX_pcr_1	4.98051	4.78844	5.94604	5.91161	5.40665	0.608197	4	17.7793	0.000387976
											SiJWE06BCC_pcr_1	3.98409	4.17702	6.78494	6.71821	5.41607	1.54436	4	7.01398	0.00595218
											SiJWE11ADD_pcr_1	4.93959	4.90944	5.95141	5.8754	5.41896	0.571909	4	18.9504	0.000320832
											SiJWF03ACA_pcr_2	5.17616	5.41781	5.45098	5.63487	5.41996	0.188495	4	57.5077	1.1583e-05
											SiJWC06BBL_pcr_1	6.6683	5.09311	4.80965	5.13714	5.42705	0.840127	4	12.9196	0.001001
											SiJWG06BBB_pcr_1	4.46016	4.55498	5.91899	6.78642	5.43014	1.12328	4	9.6684	0.00234925
											SiJWD10BAE_pcr_1	4.99769	5.25461	5.58177	5.90439	5.43462	0.393977	4	27.5885	0.000104529
											SiJWD01BAH_pcr_2	5.38008	5.2641	5.36686	5.73114	5.43554	0.203766	4	53.3508	1.45044e-05
											SiJWG07ABG_pcr_2	5.24975	4.94133	5.6493	5.90409	5.43611	0.425829	4	25.5319	0.000131773
											SiJWE11BBJ_pcr_1	4.42188	5.83899	5.29119	6.2014	5.43837	0.774084	4	14.0511	0.000780687
											SiJWD07ADP_pcr_1	4.98877	4.99644	5.88289	5.93038	5.44962	0.528081	4	20.6393	0.000248728
											SiJWE05BDY_pcr_1	5.10101	5.1517	5.75449	5.80362	5.45271	0.377937	4	28.8551	9.1396e-05
											SiJWG03BDI_pcr_1	5.4274	5.08164	5.56909	5.73447	5.45315	0.27765	4	39.2807	3.63012e-05
											SiJWH03ADR_pcr_1	4.75171	5.15056	5.66624	6.26445	5.45824	0.655001	4	16.6664	0.000470271
											SiJWG02ACP_pcr_2	4.50171	4.17983	6.79158	6.37029	5.46085	1.31135	4	8.32862	0.00362793
											SiJWF12BAE_pcr_1	4.65245	4.77799	6.03244	6.40431	5.4668	0.882513	4	12.3892	0.00113306
											SiJWB01BAF_pcr_1	4.36434	4.95856	5.60315	6.946	5.46801	1.1076	4	9.87361	0.00220919
											SiJWH08ADI_pcr_1	4.52197	4.8451	6.07032	6.43753	5.46873	0.928395	4	11.781	0.00131452
											SiJWE09ACK_pcr_2	5.13536	4.98127	5.94285	5.83078	5.47257	0.484618	4	22.5851	0.000190085
											SiJWF10ACI_pcr_2	4.36839	4.21292	6.69473	6.63625	5.47807	1.37279	4	7.98095	0.00410478
											SiJWA09ACN_pcr_2	5.25494	5.39401	5.65394	5.62199	5.48122	0.190135	4	57.6562	1.14938e-05
											SiJWA06ACY_pcr_1	5.31477	5.47277	5.40114	5.75897	5.48691	0.192532	4	56.9973	1.18967e-05
											SiJWD02BAN_pcr_1	5.70279	5.14099	5.6394	5.47025	5.48836	0.25152	4	43.6415	2.64821e-05
											SiJWB02ACN_pcr_2	5.42304	5.38822	5.48628	5.6781	5.49391	0.129327	4	84.9613	3.5941e-06
											SiJWE11ABP_pcr_2	5.42298	5.48779	5.53345	5.54305	5.49681	0.0548102	4	200.576	2.73271e-07
											SiJWH10BDE_pcr_1	4.90527	3.86066	6.28462	6.98016	5.50768	1.39612	4	7.89	0.00424305
											SiJWG06ABL_pcr_2	5.34494	5.38381	5.68882	5.62032	5.50947	0.170605	4	64.5873	8.17814e-06
											SiJWD08CAH_pcr_1	4.52105	4.4639	6.14476	6.93426	5.51599	1.22524	4	9.00394	0.00289212
											SiJWC11BBE_pcr_1	4.74474	5.09689	6.07114	6.18747	5.52506	0.71396	4	15.4772	0.000586008
											SiJWA11BAV_pcr_1	5.0649	5.38822	5.1956	6.47481	5.53088	0.643148	4	17.1994	0.000428224
											SiJWG04BCG_pcr_1	4.85692	4.88217	6.26016	6.1596	5.53971	0.775001	4	14.296	0.000741699
											SiJWF02BCJ_pcr_1	4.22375	5.61879	5.53823	6.78529	5.54151	1.04713	4	10.5842	0.00180185
											SiJWD04BBF_pcr_1	5.54553	5.14081	5.35917	6.14034	5.54646	0.429079	4	25.8529	0.000126943
											SiJWA03BDN_pcr_1	4.87262	4.56797	6.40097	6.38456	5.55653	0.973604	4	11.4144	0.00144293
											SiJWH01BDL_pcr_1	5.07458	5.50548	5.61473	6.05721	5.563	0.403643	4	27.564	0.000104807
											SiJWB04ACE_pcr_2	5.74239	5.74908	5.61485	5.17614	5.57062	0.270138	4	41.2428	3.13696e-05
											SiJWE11BCI_pcr_1	5.21012	5.10954	6.19052	5.78965	5.57496	0.508179	4	21.9409	0.000207237
											SiJWB04ACX_pcr_1	4.90457	5.00385	5.76861	6.63721	5.57856	0.80445	4	13.8693	0.000811415
											SiJWD07BCU_pcr_1	8.12116	4.45429	4.76891	5.00552	5.58747	1.70415	4	6.55749	0.00721179
											SiJWF09ABB_pcr_2	5.41837	5.78363	5.51237	5.66681	5.59529	0.162035	4	69.0627	6.68978e-06
											SiJWD01ADP_pcr_1	5.35911	5.65759	5.25297	6.1475	5.60429	0.400606	4	27.9791	0.000100225
											SiJWE04ABE_pcr_2	4.77142	4.76024	6.26823	6.61954	5.60486	0.979395	4	11.4456	0.00143137
											SiJWD02CAB_pcr_1	4.88724	4.76637	5.82662	6.97469	5.61373	1.02361	4	10.9685	0.00162251
											SiJWC01ACG_pcr_2	5.08004	5.10118	6.13327	6.14085	5.61384	0.604241	4	18.5814	0.000340191
											SiJWD11CAR_pcr_1	4.22436	3.95245	6.87138	7.47111	5.62982	1.80006	4	6.25513	0.00824477
											SiJWH05ABU_pcr_2	4.95671	4.87564	6.36132	6.35335	5.63675	0.83272	4	13.5382	0.000871618
											SiJWE12ABP_pcr_2	4.93445	5.28403	6.18257	6.15097	5.638	0.627155	4	17.9796	0.000375244
											SiJWC01BAY_pcr_1	5.69219	6.01687	5.30355	5.56036	5.64324	0.296792	4	38.0283	4.0001e-05
											SiJWC02BAL_pcr_1	5.24127	5.35139	6.06508	5.91556	5.64333	0.407785	4	27.678	0.000103521
											SiJWC09ABV_pcr_2	5.36915	5.28753	6.02594	5.91085	5.64837	0.373995	4	30.2056	7.97075e-05
											SiJWC06AAT_pcr_2	4.71191	4.92098	6.30611	6.6629	5.65047	0.977742	4	11.5582	0.00139065
											SiJWH11BAD_pcr_1	5.33086	5.65321	5.69469	5.92356	5.65058	0.24406	4	46.3049	2.21749e-05
											SiJWC06BAF_pcr_1	4.94589	5.13996	5.89237	6.63266	5.65272	0.770332	4	14.6761	0.00068617
											SiJWF02ABF_pcr_2	5.24385	5.15624	5.71893	6.50654	5.65639	0.618332	4	18.2956	0.000356268
											SiJWG10BDI_pcr_1	4.74826	4.74527	6.7353	6.40706	5.65897	1.06181	4	10.6591	0.0017649
											SiJWE03ADY_pcr_newprimers	5.24985	5.24879	6.08962	6.05221	5.66012	0.474592	4	23.8526	0.000161482
											SiJWG10BCY_pcr_1	4.3016	4.66403	6.86153	6.84677	5.66848	1.37707	4	8.23265	0.00375191
											SiJWE07BDI_pcr_1	7.40783	5.81913	4.71415	4.75878	5.67497	1.26309	4	8.98587	0.0029091
											SiJWF06BDW_pcr_2	5.08426	5.24164	5.96015	6.42126	5.67683	0.625829	4	18.1418	0.000365343
											SiJWH07ACX_pcr_1	4.67631	4.27557	6.65041	7.18848	5.69769	1.4371	4	7.92942	0.00418238
											SiJWF11BCG_pcr_1	5.91812	6.2493	5.18539	5.50381	5.71416	0.466126	4	24.5177	0.000148744
											SiJWF11BDV_pcr_1	5.5618	5.43879	5.61067	6.25728	5.71714	0.367287	4	31.1317	7.28198e-05
											SiJWC03ABT_pcr_2	5.12629	5.02268	6.31522	6.47661	5.7352	0.766935	4	14.9561	0.000648733
											SiJWD04BCS_pcr_1	5.18833	5.25308	6.2209	6.28428	5.73664	0.596907	4	19.2212	0.000307547
											SiJWF08CAG_pcr_1	5.07201	4.87799	5.97018	7.03066	5.73771	0.984554	4	11.6555	0.00135673
											SiJWG12CAO_pcr_1	5.00174	4.39808	6.61491	6.93772	5.73812	1.23096	4	9.32301	0.00261277
											SiJWE02BDM_pcr_1	5.01763	5.06234	6.28914	6.5852	5.73858	0.815875	4	14.0673	0.000778028
											SiJWE06ACE_pcr_2	5.45947	5.83112	5.89685	5.78554	5.74325	0.194623	4	59.0191	1.07163e-05
											SiJWF03ABP_pcr_2	5.4154	5.30308	5.91828	6.33672	5.74337	0.477521	4	24.0549	0.000157457
											SiJWB08AAD_pcr_2	5.60871	5.3626	5.68343	6.49852	5.78831	0.492914	4	23.4861	0.000169126
											SiJWE03ADY_pcr_1	5.83799	4.88826	6.37489	6.07956	5.79517	0.643241	4	18.0187	0.000372827
											SiJWG11CAT_pcr_1	5.02528	5.1018	6.55218	6.50973	5.79725	0.847966	4	13.6733	0.00084635
											SiJWF06ACI_pcr_2	5.7407	5.88646	5.78351	5.81144	5.80553	0.0612987	4	189.418	3.24464e-07
											SiJWB05CAP_pcr_1	4.71875	5.11471	6.49166	6.90421	5.80733	1.05454	4	11.0139	0.0016029
											SiJWF10BCT_pcr_1	5.44721	5.56503	6.2409	5.98204	5.8088	0.368281	4	31.5455	6.99987e-05
											SiJWE05ABN_pcr_2	5.54481	5.33172	6.57578	5.80586	5.81454	0.543274	4	21.4056	0.000223094
											SiJWG09ABQ_pcr_2	4.97143	5.0627	6.78542	6.44414	5.81592	0.933651	4	12.4585	0.00111454
											SiJWH05BCO_pcr_1	4.30414	5.07957	6.67642	7.21822	5.81959	1.35825	4	8.56922	0.00334007
											SiJWA07ABI_pcr_2	5.69553	5.46851	5.91922	6.22168	5.82623	0.321492	4	36.2449	4.61892e-05
											SiJWH07ADB_pcr_1	5.24358	5.55949	5.94878	6.59102	5.83572	0.580284	4	20.1133	0.000268638
											SiJWH01CAA_pcr_1	4.37857	4.83401	6.77218	7.36182	5.83665	1.45289	4	8.03455	0.00402608
											SiJWB07CAE_pcr_1	5.24751	4.80552	6.74451	6.57645	5.8435	0.96292	4	12.137	0.00120398
											SiJWF09BAP_pcr_1	4.9656	5.31204	6.48222	6.62904	5.84723	0.832293	4	14.0509	0.000780721
											SiJWF12ACU_pcr_2	4.82126	4.84129	6.6287	7.11369	5.85124	1.1943	4	9.79857	0.00225909
											SiJWF07BBU_pcr_1	7.8732	5.24261	5.22301	5.12977	5.86715	1.33827	4	8.76823	0.00312438
											SiJWD12CAM_pcr_1	5.57263	5.7888	5.71604	6.44359	5.88027	0.386141	4	30.4566	7.77577e-05
											SiJWB01BCK_pcr_1	5.44972	5.41951	6.04784	6.66601	5.89577	0.5894	4	20.006	0.000272959
											SiJWA09ADM_pcr_1	4.75401	4.20491	7.24189	7.41066	5.90287	1.66025	4	7.1108	0.00572305
											SiJWD07CAE_pcr_1	5.8644	5.5005	5.82137	6.4863	5.91814	0.412104	4	28.7216	9.26728e-05
											SiJWH07ACL_pcr_2	5.58859	5.68499	6.45934	6.01655	5.93737	0.393302	4	30.1924	7.98112e-05
											SiJWD04CAJ_pcr_1	5.86662	5.27771	6.13396	6.47881	5.93928	0.507264	4	23.4169	0.000170623
											SiJWB07ADZ_pcr_1	5.88332	5.80836	6.02181	6.0624	5.94397	0.118539	4	100.287	2.18563e-06
											SiJWF08CAG_pcr_1	5.20739	5.01017	6.11392	7.45269	5.94604	1.1135	4	10.6799	0.0017548
											SiJWF07ABU_pcr_2	4.85337	5.65876	6.56701	6.70838	5.94688	0.864724	4	13.7544	0.000831652
											SiJWH07AAE_pcr_2	5.14645	5.566	6.78257	6.29739	5.94811	0.73189	4	16.2541	0.000506636
											SiJWH05BDK_pcr_1	5.20998	5.50201	6.50404	6.60281	5.95471	0.702699	4	16.9481	0.000447395
											SiJWH02AAS_pcr_2	5.297	5.35989	6.25354	6.99	5.97511	0.805367	4	14.8382	0.000664155
											SiJWH06ACJ_pcr_2	5.56316	5.70633	6.17627	6.4685	5.97857	0.418645	4	28.5615	9.4235e-05
											SiJWH02BDN_pcr_1	5.17013	5.28516	6.59145	6.87224	5.97975	0.87724	4	13.6331	0.000853766
											SiJWC08ADM_pcr_1	6.52089	4.59867	5.81434	6.98628	5.98004	1.03934	4	11.5074	0.00140882
											SiJWD02BBF_pcr_1	5.1043	6.28498	6.10624	6.45664	5.98804	0.606279	4	19.7534	0.000283499
											SiJWC03BCX_pcr_1	5.69342	6.08277	6.00855	6.26657	6.01283	0.238966	4	50.3236	1.72798e-05
											SiJWB04BAN_pcr_1	6.31457	4.81801	6.56811	6.35357	6.01356	0.804796	4	14.9443	0.000650257
											SiJWB04ABZ_pcr_2	5.48735	5.16944	6.87796	6.55977	6.02363	0.823518	4	14.629	0.000692735
											SiJWC06BDL_pcr_1	6.63432	5.33024	6.06359	6.11611	6.03606	0.536426	4	22.5047	0.000192119
											SiJWB03ADE_pcr_1	5.29529	5.3963	6.20334	7.25827	6.0383	0.909172	4	13.2831	0.000922113
											SiJWB01ACQ_pcr_2	6.12631	6.16936	5.62154	6.2472	6.0411	0.284148	4	42.5209	2.86286e-05
											SiJWF01ADI_pcr_1	6.09997	6.07428	6.07007	5.94385	6.04704	0.0700512	4	172.646	4.28496e-07
											SiJWA06ADW_pcr_1	5.87528	5.77663	6.27464	6.31639	6.06074	0.274605	4	44.1414	2.55935e-05
											SiJWE05BCB_pcr_1	5.28295	5.30427	6.57549	7.10423	6.06673	0.918496	4	13.2101	0.00093726
											SiJWH08AAF_pcr_2	5.80371	5.69294	6.096	6.75002	6.08567	0.474413	4	25.6556	0.000129884
											SiJWF11BAB_pcr_1	5.63091	6.2272	6.0899	6.4652	6.1033	0.351026	4	34.774	5.22895e-05
											SiJWD07BCA_pcr_1	NA	5.35104	6.22388	6.74188	6.1056	0.702922	3	15.0446	0.00438905
											SiJWC06ADS_pcr_1	5.38744	5.06325	6.8402	7.14772	6.10965	1.03728	4	11.7802	0.00131481
											SiJWE05ACK_pcr_2	5.97822	6.09845	6.0675	6.30918	6.11334	0.140161	4	87.233	3.32065e-06
											SiJWD01AAS_pcr_2	6.54682	5.97719	5.82413	6.12553	6.11842	0.310983	4	39.3489	3.61131e-05
											SiJWD10CAG_pcr_1	5.47557	4.9306	6.28725	7.79256	6.1215	1.24571	4	9.82813	0.00223926
											SiJWE11ACF_pcr_2	5.38874	5.84464	7.22814	6.05438	6.12897	0.783693	4	15.6413	0.000567939
											SiJWF09BBT_pcr_1	4.91187	5.19077	6.96625	7.49231	6.1403	1.28072	4	9.58881	0.00240674
											SiJWC09BDQ_pcr_1	5.55834	5.80455	6.67721	6.5713	6.15285	0.555223	4	22.1635	0.000201085
											SiJWD10ACN_pcr_2	6.14882	5.62706	6.25757	6.59053	6.15599	0.399564	4	30.8135	7.50935e-05
											SiJWD12ABO_pcr_2	5.32511	5.76026	6.40965	7.18913	6.17104	0.811946	4	15.2006	0.000618248
											SiJWH12BDR_pcr_1	5.59005	5.43226	6.43365	7.24771	6.17592	0.838936	4	14.7232	0.000679667
											SiJWD09BAT_pcr_1	5.80645	5.75784	6.39347	6.74607	6.17596	0.477385	4	25.8741	0.000126632
											SiJWG01ADC_pcr_1	5.77464	5.82284	6.45517	6.65876	6.17785	0.446019	4	27.7022	0.000103251
											SiJWC01BBI_pcr_1	5.35717	6.6932	6.11977	6.60085	6.19275	0.611148	4	20.266	0.000262649
											SiJWE11BBY_pcr_1	5.43855	5.30716	6.85449	7.22092	6.20528	0.974252	4	12.7385	0.00104366
											SiJWD11BDT_pcr_1	5.31421	5.87697	6.27167	7.36996	6.2082	0.868459	4	14.2971	0.000741539
											SiJWB09AAF_pcr_2	5.87521	5.45386	6.67392	6.83861	6.2104	0.656811	4	18.9108	0.000322841
											SiJWH07BCT_pcr_1	5.41698	5.34785	6.6495	7.48339	6.22443	1.03054	4	12.0799	0.00122086
											SiJWB01ADS_pcr_1	5.98037	5.53811	6.17199	7.21833	6.2272	0.712076	4	17.4903	0.000407375
											SiJWB04BDX_pcr_1	5.66351	5.69685	6.60854	6.96678	6.23392	0.656058	4	19.0042	0.000318135
											SiJWE10ABS_pcr_2	5.03933	5.23633	7.27409	7.4286	6.24459	1.28206	4	9.74152	0.00229803
											SiJWF10ADA_pcr_1	5.78349	5.57331	6.72711	6.91734	6.25031	0.670451	4	18.6451	0.000336742
											SiJWG07ACQ_pcr_2	7.18058	6.32532	5.82459	5.67328	6.25094	0.679518	4	18.3982	0.000350386
											SiJWD04BAL_pcr_1	5.35057	6.07762	6.6998	6.95464	6.27066	0.715502	4	17.528	0.00040477
											SiJWD04CAW_pcr_1	4.84871	5.40864	6.83176	8.05913	6.28706	1.44653	4	8.69259	0.00320413
											SiJWC02BCF_pcr_1	5.65949	5.71036	6.66521	7.1162	6.28781	0.720391	4	17.4567	0.000409712
											SiJWA10BCE_pcr_1	4.80891	5.63279	7.18937	7.52237	6.28836	1.28493	4	9.78786	0.00226633
											SiJWH07AAO_pcr_2	6.95134	6.70636	5.44947	6.0851	6.29807	0.673037	4	18.7154	0.000332989
											SiJWE08ACI_pcr_2	6.54237	6.8327	5.5679	6.27669	6.30492	0.541272	4	23.2967	0.000173267
											SiJWE01BBI_pcr_1	6.14068	6.508	5.78605	6.79471	6.30736	0.438678	4	28.7562	9.23398e-05
											SiJWB06CAQ_pcr_1	5.33318	6.20986	6.78679	6.94737	6.3193	0.729708	4	17.3201	0.000419404
											SiJWC05BCT_pcr_1	6.05221	6.21893	6.34631	6.70893	6.33159	0.278894	4	45.4051	2.3518e-05
											SiJWA04ADH_pcr_1	5.73085	5.52018	7.04494	7.07198	6.34199	0.831844	4	15.248	0.000612557
											SiJWC01ABZ_pcr_2	6.1591	6.27392	6.48718	6.45368	6.34347	0.15452	4	82.1053	3.98221e-06
											SiJWF05BAL_pcr_1	5.61148	5.8737	6.71358	7.25228	6.36276	0.75673	4	16.8165	0.000457894
											SiJWG08BCZ_pcr_1	6.08033	5.84095	6.62603	6.97564	6.38074	0.515006	4	24.7793	0.0001441
											SiJWD12AAO_pcr_2	5.97573	5.87915	6.41478	7.26069	6.38259	0.630102	4	20.2589	0.000262922
											SiJWD09ABC_pcr_2	6.51053	6.21822	6.02182	6.79793	6.38713	0.33959	4	37.6167	4.1326e-05
											SiJWG11BBJ_pcr_1	5.70277	6.05947	6.6645	7.1452	6.39298	0.639575	4	19.9914	0.000273556
											SiJWG02ABP_pcr_2	6.14548	5.88282	7.06789	6.57079	6.41674	0.518453	4	24.7534	0.000144551
											SiJWG07ACE_pcr_2	6.3779	6.09727	5.86743	7.3621	6.42617	0.657943	4	19.5341	0.000293093
											SiJWF01AAB_pcr_1	6.17084	5.64433	6.86007	7.02993	6.42629	0.640118	4	20.0785	0.000270032
											SiJWD03BAP_pcr_1	6.28849	6.18345	6.27675	7.08175	6.45761	0.41874	4	30.843	7.48788e-05
											SiJWC10BBX_pcr_1	5.14304	5.54221	7.76788	7.56377	6.50422	1.35373	4	9.60933	0.00239174
											SiJWD04BAM_pcr_1	6.27343	6.05633	6.91176	6.83968	6.5203	0.420896	4	30.983	7.38712e-05
											SiJWF03ABH_pcr_2	6.16305	5.93613	6.69092	7.29766	6.52194	0.606156	4	21.519	0.000219602
											SiJWC07BEA_pcr_1	5.67844	5.63245	7.48162	7.36623	6.53968	1.02229	4	12.7942	0.00103031
											SiJWF01AAB_pcr_2	6.43552	6.36412	6.44132	7.18935	6.60758	0.389432	4	33.9345	5.6259e-05
											SiJWC07BEA_pcr_2	5.92436	6.29637	6.54201	7.7103	6.61826	0.771034	4	17.1672	0.000430616
											SiJWH04BCC_pcr_1	5.59581	5.93502	7.52597	7.43268	6.62237	0.999895	4	13.2461	0.000929745
											SiJWG08AEA_pcr_1	6.29338	6.23297	6.78819	7.27697	6.64788	0.487601	4	27.2677	0.00010825
											SiJWA07BCB_pcr_1	5.68187	5.70777	7.00856	8.21343	6.65291	1.21077	4	10.9895	0.00161339
											SiJWF05BAN_pcr_1	5.99306	6.04311	7.12468	7.4822	6.66076	0.756595	4	17.6072	0.000399373
											SiJWF11BCK_pcr_1	5.58661	5.8648	7.65565	7.54783	6.66372	1.08996	4	12.2275	0.00117788
											SiJWD12CAR_pcr_1	6.11172	5.97701	6.93607	7.71537	6.68504	0.807175	4	16.5641	0.000478963
											SiJWG03BAS_pcr_1	5.95774	6.21768	7.07866	7.49769	6.68794	0.721731	4	18.5331	0.000342843
											SiJWF04AAS_pcr_2	5.89317	5.83436	7.44619	7.63919	6.70323	0.972822	4	13.781	0.00082691
											SiJWG01ADB_pcr_1	6.60122	6.37883	6.80025	7.08659	6.71672	0.300715	4	44.6717	2.4694e-05
											SiJWG08BDN_pcr_1	6.35676	6.27103	6.80813	7.43993	6.71896	0.53528	4	25.1045	0.000138593
											SiJWB10AA1_pcr_1	4.91798	5.77673	8.35805	7.92537	6.74453	1.6604	4	8.124	0.00389911
											SiJWA04AAB_pcr_1	6.41313	5.91208	7.33556	7.62464	6.82135	0.796473	4	17.1289	0.00043349
											SiJWC10CAK_pcr_1	5.94549	6.15709	7.42859	7.80714	6.83458	0.921627	4	14.8316	0.000665042
											SiJWC09ADG_pcr_1	6.4214	6.33215	7.11659	7.47168	6.83546	0.550329	4	24.8414	0.000143027
											SiJWE08BDP_pcr_1	5.57052	5.54994	7.5112	8.8506	6.87057	1.60884	4	8.54099	0.00337224
											SiJWG03ADX_pcr_1	6.56995	5.6171	7.44631	7.91829	6.88791	1.01482	4	13.5747	0.000864689
											SiJWG01ABX_pcr_2	6.29288	6.02118	7.38392	7.95108	6.91227	0.909075	4	15.2073	0.000617445
											SiJWA04AAB_pcr_2	6.40222	6.48154	7.42511	7.36284	6.91793	0.551232	4	25.0999	0.000138669
											SiJWH12BCM_pcr_1	6.47741	6.58781	7.02066	7.58795	6.91846	0.504155	4	27.4458	0.000106163
											SiJWF10CAH_pcr_1	7.57556	7.4133	6.2249	6.49827	6.92801	0.666801	4	20.7798	0.000243744
											SiJWF11AAC_pcr_2	6.88886	6.76602	6.99057	7.15284	6.94957	0.163685	4	84.9143	3.60008e-06
											SiJWA07BDO_pcr_1	6.04859	6.00203	7.86711	7.88448	6.95055	1.06857	4	13.0091	0.000980774
											SiJWD08ACQ_pcr_2	6.53295	6.43253	7.63131	7.55618	7.03824	0.643479	4	21.8756	0.00020909
											SiJWD10ABG_pcr_2	6.62808	6.57566	7.89922	7.2992	7.10054	0.626115	4	22.6813	0.000187689
											SiJWG02ABG_pcr_2	6.43809	6.50977	7.70259	8.11409	7.19114	0.845532	4	17.0097	0.000442589
											SiJWG01CAF_pcr_1	6.9387	7.8734	7.15647	7.19365	7.29056	0.404505	4	36.0468	4.69537e-05
											SiJWB01CAE_pcr_1	6.4175	6.37644	7.9563	8.43744	7.29692	1.05771	4	13.7976	0.00082396
											SiJWF11AAC_pcr_1	7.31554	7.15556	7.47137	7.87501	7.45437	0.308646	4	48.3036	1.95372e-05
											SiJWC04ADI_pcr_1	6.35615	6.69751	8.2458	8.64732	7.4867	1.12905	4	13.262	0.00092646
											SiJWG12ADB_pcr_1	6.73735	6.94443	7.77119	8.50151	7.48862	0.809596	4	18.4996	0.000344692
											SiJWC01CAJ_pcr_1	6.28792	8.99096	7.35677	8.19916	7.7087	1.15862	4	13.3067	0.000917281
											SiJWA08BCY_pcr_1	5.73854	10.7119	8.01853	8.39289	8.21546	2.03613	4	8.06967	0.00397558
