# Supplementary material for: An annotated cDNA library and microarray for large-scale gene-expression studies in the ant Solenopsis invicta
Source: Genome Biol. 2007 Jan 15;8(1):R9. doi: 10.1186/gb-2007-8-1-r9 (PMC1839134; doi:10.1186/gb-2007-8-1-r9)
Supplement: Additional data file 12 — Fire ant clones that are differentially expressed between adults and brood based on a t-test (p < 0.001) [file gb-2007-8-1-r9-S12.xls]

## Sheet: Sheet1
Additional data file 12: Adult- and brood-enriched genes using one-sample t-test (p<0.001)
Please note that this is from one biological replicate.
The t-test is based on four technical replicates.
Adult Enriched genes (1154 total)											Brood Enriched genes (1444 total)
ID	B109	neg B110	C021	neg C022	Average	SD	N	t-value	p-value		ID	B109	neg B110	C021	neg C022	Average	SD	N	t-value	p-value
SiJWA01CAK_pcr_1	-7.267	-6.31482	-7.37477	-7.4655	-7.10552	0.533343	4	26.6452	0.000115989		SiJWE12BCY_pcr_1	0.176902	0.246201	0.186916	0.208617	0.204659	0.0306956	4	13.3347	0.000911579
SiJWH12ADP_pcr_1	-6.16447	-6.18268	-7.55469	-7.75431	-6.91404	0.85892	4	16.0994	0.000521248		SiJWF11BBJ_pcr_1	0.219893	0.201512	0.227554	0.172535	0.205373	0.0244684	4	16.7868	0.000460303
SiJWB04AAD_pcr_2	-6.03887	-6.39179	-7.42002	-7.44041	-6.82277	0.716108	4	19.0551	0.000315606		SiJWE03ABY_pcr_2	0.192238	0.236782	0.198049	0.194819	0.205472	0.0210081	4	19.5612	0.000291885
SiJWH01ACR_pcr_2	-5.77281	-6.18868	-7.53705	-7.77098	-6.81738	0.985507	4	13.8353	0.000817333		SiJWB10ADX_pcr_1	0.248026	0.201254	0.231718	0.21635	0.224337	0.0201016	4	22.3203	0.000196897
SiJWE02BDQ_pcr_1	-5.8094	-6.42293	-6.79182	-7.38655	-6.60267	0.66127	4	19.9697	0.000274442		SiJWD11ACU_pcr_2	0.277949	0.315499	0.259524	0.274371	0.281836	0.0238181	4	23.6657	0.000165321
SiJWH02BAR_pcr_1	-5.81445	-5.57155	-6.88115	-7.18385	-6.36275	0.789426	4	16.1199	0.000519275		SiJWH02BDM_pcr_1	0.285139	0.300703	0.253333	0.306094	0.286317	0.0237168	4	24.1447	0.000155715
SiJWF06AAN_pcr_2	-5.86591	-5.80894	-6.88107	-6.87503	-6.35774	0.601259	4	21.1481	0.000231298		SiJWB09AAS_pcr_2	0.330812	0.259504	0.326987	0.245129	0.290608	0.0446301	4	13.0229	0.00097769
SiJWG01ABF_pcr_2	-5.80574	-5.91536	-6.96055	-6.72727	-6.35223	0.577412	4	22.0024	0.000205513		SiJWD06AAK_pcr_2	0.341327	0.286747	0.314487	0.236862	0.294856	0.0446242	4	13.2151	0.000936228
SiJWD03BCJ_pcr_1	-6.23149	-6.80073	-6.52444	-5.85187	-6.35213	0.406509	4	31.2521	7.19837e-05		SiJWB07AAM_pcr_2	0.279268	0.344108	0.311167	0.25716	0.297926	0.0379389	4	15.7055	0.00056106
SiJWB11AAW_pcr_2	-5.60959	-5.73172	-6.95271	-6.55596	-6.2125	0.648208	4	19.1682	0.000310088		SiJWE10ACZ_pcr_1	0.343961	0.328784	0.351472	0.256643	0.320215	0.0434191	4	14.75	0.000676015
SiJWH10BBO_pcr_1	-5.51199	-5.33343	-6.79274	-7.17805	-6.20405	0.918723	4	13.5058	0.000877815		SiJWD10AAA_pcr_1	0.337694	0.357337	0.264202	0.339264	0.324625	0.0412557	4	15.7372	0.000557714
SiJWC07BDB_pcr_1	-5.4626	-5.67598	-6.37947	-6.66588	-6.04598	0.56942	4	21.2356	0.000228467		SiJWC11ABW_pcr_2	0.359636	0.346559	0.324547	0.277922	0.327166	0.0358803	4	18.2365	0.00035972
SiJWC11ADI_pcr_1	-5.26769	-5.23152	-7.04089	-6.48747	-6.00689	0.903279	4	13.3002	0.000918603		SiJWH02ACE_pcr_2	0.374363	0.348547	0.296844	0.294871	0.328656	0.0393202	4	16.7169	0.000466053
SiJWB01AAE_pcr_2	-5.29716	-5.1996	-6.67092	-6.80617	-5.99346	0.863035	4	13.8893	0.000807954		SiJWA09ABC_pcr_2	0.285848	0.39566	0.31059	0.331923	0.331005	0.0470357	4	14.0746	0.000776822
SiJWF05ADT_pcr_1	-6.12579	-5.17673	-6.51119	-6.00888	-5.95564	0.56188	4	21.199	0.000229645		SiJWH07BDR_pcr_1	0.270477	0.329193	0.341528	0.384889	0.331522	0.0471878	4	14.0512	0.000780679
SiJWA03ADT_pcr_1	-5.46277	-5.00698	-7.06477	-6.11094	-5.91137	0.892435	4	13.2477	0.000929415		SiJWD06BAE_pcr_1	0.387968	0.332035	0.338389	0.269304	0.331924	0.0486622	4	13.642	0.000852124
SiJWE10BAC_pcr_1	-5.71111	-5.54735	-6.99911	-5.33589	-5.89836	0.749732	4	15.7346	0.000557989		SiHNG11w01me_pcr_1	0.308631	0.300165	0.355786	0.402449	0.341758	0.0472848	4	14.4553	0.000717723
SiJWG12BDA_pcr_1	-5.28433	-5.33641	-6.90965	-5.87569	-5.85152	0.754379	4	15.5135	0.000581949		SiJWC05ABF_pcr_2	0.369499	0.346232	0.295836	0.393404	0.351243	0.041657	4	16.8636	0.000454101
SiJWH09BCF_pcr_1	-5.26952	-5.26721	-6.58592	-6.04583	-5.79212	0.643722	4	17.9957	0.000374246		SiJWA01CAN_pcr_1	0.301106	0.382023	0.336261	0.398947	0.354584	0.0444097	4	15.9688	0.000534021
SiJWH05AAN_pcr_2	-5.051	-5.40549	-6.34609	-6.32169	-5.78107	0.654618	4	17.6624	0.000395668		SiJWD03ABO_pcr_2	0.319239	0.357998	0.312353	0.431359	0.355237	0.0545805	4	13.017	0.000979007
SiJWE03BDJ_pcr_1	-5.17872	-5.23568	-6.77492	-5.92646	-5.77894	0.745911	4	15.495	0.000584012		SiJWD05BDL_pcr_1	0.323975	0.334216	0.416335	0.349572	0.356025	0.0415604	4	17.1329	0.00043319
SiJWB09ACO_pcr_2	-5.59321	-5.18032	-6.28903	-5.41293	-5.61887	0.477673	4	23.526	0.000168271		SiJWF02ADS_pcr_1	0.353653	0.414432	0.308443	0.350726	0.356813	0.0436144	4	16.3622	0.000496751
SiJWC03BAQ_pcr_1	-4.61162	-4.96304	-6.37922	-5.82196	-5.44396	0.804503	4	13.5337	0.000872466		SiJWA11CAN_pcr_1	0.309468	0.350129	0.425232	0.355825	0.360163	0.0480397	4	14.9944	0.000643831
SiJWB03BBD_pcr_1	-5.32454	-4.32298	-6.06297	-5.82088	-5.38284	0.770531	4	13.9718	0.000793898		SiHNF02w01me_pcr_1	0.301029	0.352486	0.410892	0.392378	0.364197	0.0486548	4	14.9706	0.000646874
SiJWE08BBG_pcr_1	-4.43888	-5.20685	-6.11394	-5.56456	-5.33106	0.702101	4	15.186	0.000620013		SiJWG05BCK_pcr_1	0.425322	0.346834	0.318888	0.389458	0.370126	0.0468622	4	15.7963	0.000551533
SiJWG07AAR_pcr_2	-4.79542	-4.77864	-5.92554	-5.68838	-5.29699	0.596803	4	17.7512	0.000389804		SiJWH05CAQ_pcr_1	0.3162	0.377836	0.413944	0.37869	0.371667	0.0406255	4	18.2972	0.000356176
SiJWC07CAS_pcr_1	-6.25257	-5.2923	-4.95576	-4.59314	-5.27344	0.712456	4	14.8036	0.00066878		SiJWA05BAC_pcr_1	0.29712	0.402938	0.382395	0.408833	0.372822	0.0517243	4	14.4157	0.000723582
SiJWE07ADF_pcr_1	-4.9442	-5.09771	-5.15153	-5.52422	-5.17941	0.246084	4	42.0947	2.95058e-05		SiJWA05AAQ_pcr_2	0.333518	0.425851	0.389947	0.349153	0.374617	0.0416235	4	18.0003	0.000373962
SiJWA06ADD_pcr_1	-5.16391	-4.29819	-5.60597	-5.56852	-5.15915	0.607865	4	16.9746	0.000445317		SiJWD09AA1_pcr_1	0.327287	0.422538	0.344038	0.422898	0.37919	0.0507247	4	14.9509	0.000649408
SiJWC09ACC_pcr_2	-4.27992	-4.63303	-5.80937	-5.78817	-5.12762	0.788317	4	13.009	0.000980785		SiJWF07BDI_pcr_1	0.366773	0.363094	0.431058	0.356721	0.379411	0.0346804	4	21.8805	0.000208951
SiJWC08BDT_pcr_1	-4.89948	-4.62047	-5.55548	-5.31651	-5.09799	0.418123	4	24.3851	0.000151173		SiJWE07AAE_pcr_2	0.369351	0.403418	0.416729	0.388574	0.394518	0.0203408	4	38.7908	3.76918e-05
SiJWB07ADP_pcr_1	-4.41589	-4.42267	-5.784	-5.58312	-5.05142	0.734529	4	13.7542	0.000831694		SiJWH03BBJ_pcr_1	0.357135	0.448689	0.37897	0.405197	0.397498	0.0393797	4	20.188	0.000265687
SiJWF06BAY_pcr_1	-5.08238	-5.26403	-5.00882	-4.83103	-5.04656	0.179304	4	56.2904	1.23502e-05		SiJWH05ABR_pcr_2	0.370275	0.347946	0.420183	0.452807	0.397803	0.0475035	4	16.7484	0.000463456
SiJWG02BBB_pcr_1	-4.5428	-4.74439	-5.55282	-5.32407	-5.04102	0.475489	4	21.2035	0.000229498		SiJWD12BAO_pcr_1	0.338348	0.46077	0.357278	0.435903	0.398075	0.0594231	4	13.398	0.000898898
SiJWD01BDJ_pcr_1	-4.5138	-4.34588	-5.08056	-6.00264	-4.98572	0.74727	4	13.3438	0.000909743		SiJWB05BCO_pcr_1	0.39389	0.452622	0.371433	0.406697	0.406161	0.0342324	4	23.7296	0.000163994
SiJWA09BCM_pcr_1	-4.47876	-4.57322	-5.61941	-5.2453	-4.97917	0.546486	4	18.2225	0.000360543		SiJWD05BAX_pcr_1	0.455857	0.425345	0.34026	0.408028	0.407373	0.0489161	4	16.656	0.000471143
SiJWA03BCG_pcr_1	-4.28583	-4.50165	-5.94982	-5.17915	-4.97911	0.750755	4	13.2643	0.000925983		SiJWH11CAD_pcr_1	0.487283	0.365666	0.400932	0.42331	0.419298	0.0511591	4	16.3919	0.000494077
SiJWG04ABQ_pcr_2	-4.78402	-5.15112	-4.99528	-4.95793	-4.97209	0.150734	4	65.9718	7.67426e-06		SiJWD10AAA_pcr_2	0.472292	0.435866	0.333071	0.448449	0.42242	0.061451	4	13.7482	0.00083277
SiJWF06ACY_pcr_1	-5.52303	-5.38862	-4.39342	-4.58046	-4.97138	0.567235	4	17.5285	0.000404739		SiJWE08AAH_pcr_2	0.377619	0.393015	0.488568	0.431476	0.42267	0.049427	4	17.1028	0.000435464
SiJWH03BCU_pcr_1	-4.38795	-4.75699	-4.91588	-5.34003	-4.85021	0.394382	4	24.5965	0.000147323		SiJWH04CAL_pcr_1	0.36398	0.427076	0.505071	0.405815	0.425485	0.0591785	4	14.3797	0.00072897
SiJWG08BDJ_pcr_1	-4.43281	-5.09995	-4.89567	-4.92954	-4.83949	0.285477	4	33.9046	5.64075e-05		SiJWB12ADB_pcr_1	0.37631	0.445053	0.42503	0.465007	0.42785	0.0380392	4	22.4952	0.000192361
SiJWA05BBC_pcr_1	-4.67387	-4.17763	-5.7922	-4.57289	-4.80415	0.692634	4	13.8721	0.00081092		SiJWB04BCM_pcr_1	0.482229	0.41808	0.432341	0.388649	0.430325	0.0390934	4	22.0152	0.000205157
SiJWA01AAJ_pcr_2	-4.6948	-4.1001	-4.66028	-5.71179	-4.79174	0.671204	4	14.2781	0.000744468		SiJWG09BAZ_pcr_1	0.465145	0.482571	0.403649	0.385832	0.434299	0.0467979	4	18.5606	0.00034133
SiJWF02AAQ_pcr_2	-4.9302	-4.8401	-4.6662	-4.71114	-4.78691	0.120657	4	79.3472	4.41191e-06		SiJWH05ADY_pcr_1	0.465429	0.480017	0.401071	0.399215	0.436433	0.0423318	4	20.6196	0.000249438
SiJWA10ABU_pcr_2	-4.02985	-4.52329	-5.15903	-5.30554	-4.75443	0.590443	4	16.1046	0.000520744		SiJWC06AAZ_pcr_2	0.476823	0.442365	0.41285	0.449647	0.445421	0.0262939	4	33.8802	5.6529e-05
SiJWB09BAN_pcr_1	-4.734	-4.86362	-4.76172	-4.60493	-4.74107	0.106506	4	89.0294	3.12373e-06		SiJWF04BCG_pcr_1	0.519313	0.43383	0.425459	0.415201	0.448451	0.0478516	4	18.7434	0.000331508
SiJWC09BDX_pcr_1	-5.00342	-5.04205	-4.35152	-4.55451	-4.73787	0.339575	4	27.9047	0.000101026		SiJWE07BAS_pcr_1	0.536601	0.416895	0.421214	0.438342	0.453263	0.056325	4	16.0946	0.000521711
SiJWF07ACS_pcr_2	-4.71566	-4.81974	-4.61517	-4.75191	-4.72562	0.0853407	4	110.747	1.6231e-06		SiJWD09ADP_pcr_1	0.4108	0.438277	0.430031	0.54177	0.45522	0.0588379	4	15.4737	0.000586405
SiJWF04ABD_pcr_2	-4.27348	-4.42023	-5.18619	-4.87233	-4.68806	0.41861	4	22.3982	0.00019486		SiJWE03BDK_pcr_1	0.509968	0.489144	0.476458	0.363248	0.459704	0.0657714	4	13.9789	0.000792705
SiJWE03BDE_pcr_1	-4.41672	-4.2438	-4.65383	-5.42077	-4.68378	0.519279	4	18.0395	0.000371544		SiJWF11BAC_pcr_1	0.459175	0.549961	0.385522	0.453226	0.461971	0.0675051	4	13.687	0.000843846
SiJWC06BCR_pcr_1	-4.16066	-4.32046	-5.3292	-4.92215	-4.68311	0.541307	4	17.303	0.00042064		SiJWB12AAU_pcr_2	0.437052	0.47915	0.50402	0.43125	0.462868	0.0347599	4	26.6323	0.000116157
SiJWH02BCM_pcr_1	-4.34753	-4.72525	-4.89152	-4.68345	-4.66194	0.228059	4	40.8836	3.22025e-05		SiJWD04ABV_pcr_2	0.524809	0.41978	0.493009	0.414659	0.463064	0.0545456	4	16.979	0.000444978
SiJWE07AAI_pcr_2	-5.18584	-4.7428	-4.30991	-4.3745	-4.65326	0.403011	4	23.0925	0.000177883		SiJWD03BAW_pcr_1	0.524693	0.488167	0.466227	0.378895	0.464495	0.0619532	4	14.995	0.000643751
SiJWG01ABA_pcr_2	-4.12859	-4.15397	-4.75731	-5.51524	-4.63878	0.652573	4	14.2169	0.000754008		SiJWC11CAG_pcr_1	0.521164	0.51247	0.448922	0.399117	0.470418	0.0574151	4	16.3866	0.000494555
SiJWA06CAG_pcr_1	-5.08736	-4.96695	-4.64926	-3.68863	-4.59805	0.633819	4	14.509	0.000709869		SiJWH06CAD_pcr_1	0.472958	0.438905	0.551047	0.455683	0.479648	0.0495878	4	19.3454	0.0003017
SiJWF07ACS_pcr_1	-4.65922	-4.71633	-4.48234	-4.52392	-4.59545	0.110437	4	83.2228	3.82401e-06		SiJWD03ACT_pcr_2	0.551217	0.438758	0.495863	0.436748	0.480647	0.0544473	4	17.6555	0.000396132
SiJWC01ACH_pcr_2	-4.45282	-4.22318	-5.4336	-4.23141	-4.58525	0.57548	4	15.9354	0.000537352		SiJWB04AAE_pcr_2	0.475617	0.543334	0.419389	0.484644	0.480746	0.0507393	4	18.9497	0.00032087
SiJWG01BBU_pcr_1	-5.35734	-4.65646	-4.41153	-3.80226	-4.5569	0.643227	4	14.1689	0.000761608		SiJWC06ABO_pcr_2	0.438213	0.492175	0.452495	0.547398	0.48257	0.0488773	4	19.7462	0.000283808
SiJWA11AAP_pcr_2	-4.8966	-4.90919	-4.02518	-4.30887	-4.53496	0.440388	4	20.5953	0.00025032		SiJWB11BAZ_pcr_1	0.578051	0.472122	0.442189	0.448637	0.48525	0.0631903	4	15.3584	0.000599579
SiJWH05BDQ_pcr_1	-4.07441	-4.20791	-4.89521	-4.87578	-4.51333	0.433259	4	20.8343	0.000241848		SiJWD03ADT_pcr_1	0.505716	0.511921	0.541673	0.386833	0.486536	0.068296	4	14.2479	0.000749159
SiJWD04ACU_pcr_2	-4.38368	-4.52128	-4.57471	-4.35114	-4.4577	0.10734	4	83.0574	3.84689e-06		SiJWB02ACL_pcr_2	0.520332	0.485936	0.452642	0.491403	0.487578	0.0277526	4	35.1375	5.06868e-05
SiJWB08AAG_pcr_2	-4.06828	-3.90968	-5.06491	-4.73487	-4.44443	0.546748	4	16.2577	0.000506302		SiJWE03BCT_pcr_1	0.438673	0.458879	0.552434	0.502454	0.48811	0.0504705	4	19.3424	0.000301842
SiJWH09ADQ_pcr_1	-4.60802	-4.89585	-4.03033	-3.98648	-4.38017	0.44543	4	19.6672	0.000287223		SiJWH09BAY_pcr_1	0.438109	0.535605	0.517662	0.475279	0.491664	0.0437544	4	22.4738	0.000192909
SiJWB03BBO_pcr_1	-4.26526	-3.55962	-4.65725	-4.93959	-4.35543	0.598268	4	14.5601	0.000702505		SiJWH11BCI_pcr_1	0.528618	0.416506	0.579149	0.45246	0.494183	0.0734382	4	13.4585	0.000886987
SiJWF04BAZ_pcr_1	-4.48101	-4.73821	-4.03765	-4.08662	-4.33587	0.333668	4	25.9891	0.000124964		SiJWF09ABO_pcr_2	0.496449	0.396985	0.536229	0.55512	0.496196	0.0705159	4	14.0733	0.000777041
SiJWH07BAX_pcr_1	-4.32166	-4.40371	-4.00012	-4.60229	-4.33194	0.250633	4	34.568	5.3228e-05		SiJWB04AAI_pcr_2	0.50817	0.419485	0.576982	0.49251	0.499287	0.0646264	4	15.4515	0.000588912
SiJWA02BAF_pcr_1	-3.61999	-4.68636	-4.48632	-4.46747	-4.31503	0.473828	4	18.2135	0.000361076		SiJWC03CAN_pcr_1	0.591546	0.424851	0.519447	0.46952	0.501341	0.0714798	4	14.0275	0.000784588
SiJWE12BBH_pcr_1	-4.78276	-4.27037	-4.12983	-4.05391	-4.30922	0.328181	4	26.2612	0.000121134		SiJWG04AAJ_pcr_2	0.467082	0.545873	0.553116	0.448115	0.503547	0.0536997	4	18.7542	0.00033094
SiJWA11BBP_pcr_1	-4.58591	-4.12482	-4.51502	-3.97996	-4.30143	0.295004	4	29.1618	8.85506e-05		SiJWD10BDK_pcr_1	0.474918	0.599288	0.480181	0.459887	0.503569	0.0643896	4	15.6413	0.000567935
SiJWA04BCH_pcr_1	-3.68441	-3.98735	-4.71364	-4.72665	-4.27801	0.525327	4	16.2871	0.000503593		SiJWG03ABL_pcr_2	0.428018	0.551706	0.525155	0.517666	0.505636	0.0537669	4	18.8085	0.000328101
SiJWB02ABT_pcr_2	-4.531	-4.65624	-4.19235	-3.64145	-4.25526	0.453705	4	18.7578	0.000330748		SiJWC04AAT_pcr_2	0.51318	0.444145	0.47124	0.605686	0.508563	0.0707035	4	14.3858	0.000728058
SiJWC09AAX_pcr_1	-3.6569	-3.82602	-4.82138	-4.70564	-4.25248	0.595982	4	14.2705	0.000745638		SiJWD03BCX_pcr_1	0.450191	0.552129	0.437706	0.597211	0.509309	0.0778509	4	13.0842	0.000964203
SiJWH07ADD_pcr_1	-4.1178	-4.29448	-4.37424	-4.03138	-4.20448	0.157476	4	53.3982	1.44658e-05		SiJWD07BCW_pcr_1	0.54269	0.460766	0.453759	0.58073	0.509486	0.0623362	4	16.3464	0.000498178
SiJWD06ADP_pcr_1	-3.95848	-4.2523	-4.03554	-4.5374	-4.19593	0.259416	4	32.3491	6.49221e-05		SiJWB05ACO_pcr_2	0.42065	0.584974	0.508552	0.563371	0.519387	0.0732638	4	14.1785	0.000760071
SiJWH03BCV_pcr_1	-4.06321	-3.97454	-4.23318	-4.48338	-4.18858	0.223926	4	37.4104	4.20125e-05		SiJWG10ACH_pcr_2	0.476419	0.535431	0.572685	0.493266	0.51945	0.0433074	4	23.989	0.000158755
SiJWA06CAG_pcr_1	-4.38192	-4.65673	-4.30485	-3.39007	-4.18339	0.55002	4	15.2118	0.000616902		SiJWF11ADN_pcr_1	0.510127	0.475404	0.538646	0.558035	0.520553	0.0359598	4	28.9519	9.04847e-05
SiJWC02AAZ_pcr_2	-4.25257	-4.3078	-4.25625	-3.85608	-4.16818	0.209585	4	39.7756	3.49651e-05		SiJWG08ADZ_pcr_1	0.54939	0.584437	0.474388	0.474062	0.520569	0.0553932	4	18.7954	0.000328781
SiJWC07BDC_pcr_1	-3.87484	-3.53067	-4.48569	-4.77829	-4.16737	0.567309	4	14.6917	0.000684002		SiJWB06ADJ_pcr_1	0.495625	0.569177	0.509556	0.512579	0.521734	0.0324792	4	32.1273	6.6273e-05
SiJWG11AAR_pcr_2	-3.66444	-3.83022	-4.55894	-4.58056	-4.15854	0.479702	4	17.338	0.000418116		SiJWF10ADD_pcr_1	0.492013	0.606649	0.436274	0.575661	0.527649	0.077815	4	13.5616	0.000867158
SiJWB04BDW_pcr_2	-4.6402	-3.6594	-4.22689	-4.0675	-4.1485	0.405667	4	20.4527	0.000255559		SiJWF08BBX_pcr_1	0.510934	0.512787	0.604594	0.482785	0.527775	0.0530203	4	19.9084	0.000276968
SiJWH02ABP_pcr_2	-3.56111	-3.90605	-4.65324	-4.44317	-4.14089	0.49839	4	16.6171	0.000474432		SiJWB01ACA_pcr_2	0.61767	0.54924	0.521059	0.425008	0.528244	0.0798898	4	13.2243	0.000934291
SiJWC08BDU_pcr_1	-3.98124	-3.98106	-4.29748	-4.28004	-4.13496	0.177741	4	46.5278	2.1858e-05		SiJWF05CAR_pcr_1	0.622125	0.469657	0.545318	0.482579	0.529919	0.0697893	4	15.1863	0.000619984
SiJWF10BDM_pcr_1	-3.79571	-3.66332	-4.83934	-4.24132	-4.13492	0.530722	4	15.5823	0.000574352		SiJWH08ADA_pcr_1	0.559802	0.497324	0.461731	0.625938	0.536199	0.0722655	4	14.8397	0.000663961
SiJWC07AAC_pcr_2	-4.42675	-4.48354	-3.55483	-3.94195	-4.10177	0.438193	4	18.7213	0.000332676		SiJWC03BCR_pcr_1	0.53897	0.636598	0.459721	0.513878	0.537292	0.0740045	4	14.5205	0.000708206
SiJWA01MAA_pcr_1	-3.73443	-3.83597	-4.21932	-4.60234	-4.09801	0.395776	4	20.7087	0.00024625		SiJWH02ACT_pcr_2	0.540555	0.423712	0.593818	0.595024	0.538277	0.080489	4	13.3752	0.000903443
SiJWB02BDC_pcr_1	-3.74203	-4.14258	-4.33451	-4.16266	-4.09544	0.250861	4	32.6511	6.31409e-05		SiJWH09BCW_pcr_1	0.474826	0.539981	0.549489	0.589546	0.53846	0.0475503	4	22.648	0.000188512
SiJWC07AAC_pcr_1	-4.32344	-4.41437	-3.82477	-3.81338	-4.09399	0.319644	4	25.616	0.000130485		SiJWB09ADJ_pcr_1	0.538881	0.508979	0.533554	0.61056	0.547993	0.0436966	4	25.0817	0.000138969
SiJWF03BAD_pcr_1	-3.64769	-3.59018	-4.85592	-4.24204	-4.08396	0.593033	4	13.7731	0.000828312		SiJWD05ABG_pcr_2	0.49471	0.686512	0.516263	0.545141	0.560656	0.0864099	4	12.9767	0.000988036
SiJWB04BAA_pcr_2	-4.01427	-3.943	-4.02483	-4.3365	-4.07965	0.175047	4	46.612	2.174e-05		SiJWF07BCB_pcr_1	0.506355	0.591906	0.571747	0.573475	0.560871	0.0374716	4	29.9358	8.18763e-05
SiJWF06BCF_pcr_1	-3.94915	-3.80227	-4.23788	-4.23749	-4.0567	0.217419	4	37.3168	4.23288e-05		SiJWB12ACR_pcr_2	0.510033	0.623711	0.544542	0.584738	0.565756	0.0492416	4	22.9788	0.000180525
SiJWG01BBZ_pcr_1	-4.0753	-4.2694	-3.92579	-3.85464	-4.03128	0.183457	4	43.9481	2.59324e-05		SiJWA08BEA_pcr_2	0.514436	0.511477	0.587262	0.658866	0.56801	0.0699802	4	16.2335	0.000508552
SiJWH04MAA_pcr_1	-3.69584	-3.8008	-4.30546	-4.30942	-4.02788	0.325642	4	24.738	0.000144819		SiJWC02ADI_pcr_1	0.6238	0.623876	0.582714	0.44977	0.57004	0.0824902	4	13.8208	0.000819873
SiJWF09BBR_pcr_1	-3.51595	-3.64354	-4.2855	-4.66295	-4.02698	0.541439	4	14.8751	0.000659277		SiJWH11AAI_pcr_2	0.610292	0.581789	0.488611	0.607231	0.571981	0.0570294	4	20.0592	0.000270807
SiJWB05BDA_pcr_1	-4.31537	-4.07766	-3.85296	-3.84936	-4.02384	0.221758	4	36.2904	4.6016e-05		SiJWH12AAT_pcr_2	0.595976	0.587603	0.590247	0.516176	0.572501	0.0377123	4	30.3615	7.84889e-05
SiJWB11AAS_pcr_2	-3.64247	-3.54115	-4.25167	-4.64378	-4.01977	0.521088	4	15.4283	0.000591538		SiJWG07ACZ_pcr_1	0.529016	0.697028	0.513569	0.574176	0.578447	0.0831311	4	13.9165	0.000803279
SiJWD12ACD_pcr_2	-3.81764	-4.70911	-3.66567	-3.84106	-4.00837	0.473583	4	16.9279	0.000448988		SiJWC02BCU_pcr_1	0.518871	0.536624	0.613402	0.645425	0.578581	0.0605703	4	19.1045	0.000313184
SiJWH11AAB_pcr_1	-3.48848	-3.55406	-4.36933	-4.44762	-3.96487	0.513924	4	15.4298	0.000591373		SiJWE06AEA_pcr_1	0.56173	0.634504	0.475344	0.659627	0.582801	0.0827976	4	14.0777	0.000776318
SiJWD07ABB_pcr_2	-3.61412	-3.86589	-4.49163	-3.87224	-3.96097	0.373636	4	21.2023	0.000229539		SiJWB12BDN_pcr_1	0.605839	0.539564	0.653658	0.575481	0.593636	0.0483217	4	24.5701	0.000147796
SiJWD01BAS_pcr_1	-3.67198	-3.36684	-4.28426	-4.42821	-3.93782	0.502394	4	15.6763	0.000564181		SiJWD01BAE_pcr_1	0.558404	0.60558	0.559132	0.65503	0.594537	0.0459725	4	25.8649	0.000126768
SiJWE02ADS_pcr_1	-3.85174	-3.27973	-4.25052	-4.35674	-3.93468	0.48776	4	16.1337	0.000517961		SiJWD06BDN_pcr_1	0.652215	0.481465	0.574459	0.670531	0.594667	0.0861978	4	13.7977	0.000823938
SiJWE10ACO_pcr_2	-4.11328	-4.45249	-3.80367	-3.36412	-3.93339	0.462864	4	16.9959	0.000443663		SiJWE02ADH_pcr_1	0.56926	0.513026	0.685877	0.614245	0.595602	0.0730523	4	16.3062	0.000501839
SiJWG10BDP_pcr_1	-3.39571	-4.06338	-4.17678	-4.08129	-3.92929	0.359187	4	21.8788	0.000208999		SiJWG11CAX_pcr_1	0.474946	0.634051	0.597053	0.689653	0.598926	0.090994	4	13.1641	0.000947
SiJWG07BDV_pcr_1	-4.16745	-3.89381	-3.77119	-3.8447	-3.91928	0.172944	4	45.3243	2.36437e-05		SiJWC03BDC_pcr_1	0.56591	0.632122	0.609464	0.590764	0.599565	0.0280957	4	42.6802	2.83096e-05
SiJWC03BAS_pcr_1	-3.60478	-3.7215	-4.07591	-4.18643	-3.89716	0.278073	4	28.0298	9.96839e-05		SiJWD07CAB_pcr_1	0.590845	0.581014	0.5505	0.678054	0.600103	0.0547324	4	21.9286	0.000207585
SiJWD01BAF_pcr_1	-4.02774	-3.89169	-3.71172	-3.89215	-3.88082	0.129651	4	59.8658	1.02683e-05		SiJWC06AEA_pcr_1	0.634271	0.515789	0.682381	0.57962	0.603015	0.071721	4	16.8156	0.000457966
SiJWH08ADC_pcr_1	-3.85151	-4.34018	-3.67689	-3.58355	-3.86303	0.336928	4	22.9309	0.000181652		SiJWC08BBG_pcr_1	0.628701	0.494058	0.702306	0.590215	0.60382	0.0867015	4	13.9287	0.000801195
SiJWA10ADN_pcr_1	-3.28985	-3.67395	-3.90389	-4.58019	-3.86197	0.541682	4	14.2592	0.000747398		SiJWA12ADB_pcr_1	0.63698	0.512839	0.686007	0.579673	0.603875	0.0746431	4	16.1803	0.000513533
SiJWG08BDY_pcr_1	-3.99697	-4.22515	-3.90995	-3.26231	-3.8486	0.412837	4	18.6446	0.000336767		SiJWC06BCY_pcr_1	0.563484	0.611074	0.543429	0.704703	0.605672	0.0718571	4	16.8577	0.000454572
SiJWB05AAG_pcr_2	-3.3685	-3.41675	-4.30557	-4.27893	-3.84244	0.519884	4	14.7819	0.000671693		SiJWA11ADB_pcr_1	0.588664	0.555779	0.701004	0.581248	0.606674	0.0644447	4	18.8277	0.000327103
SiJWF02BCM_pcr_1	-3.26783	-3.39329	-4.21877	-4.42563	-3.82638	0.580982	4	13.1721	0.000945289		SiJWD10ABL_pcr_2	0.628356	0.700958	0.572499	0.530807	0.608155	0.0736536	4	16.5139	0.000483299
SiJWD12BAE_pcr_1	-3.20178	-3.44099	-4.25628	-4.32219	-3.80531	0.567893	4	13.4015	0.000898197		SiJWH12AAS_pcr_2	0.69568	0.529207	0.641919	0.580138	0.611736	0.0724962	4	16.8764	0.000453076
SiJWB05BCM_pcr_1	-3.40729	-3.22463	-4.29383	-4.22586	-3.7879	0.550728	4	13.756	0.000831371		SiJWH07BCO_pcr_1	0.57072	0.582265	0.733518	0.57264	0.614786	0.0793155	4	15.5023	0.000583197
SiJWH08BAF_pcr_1	-3.7921	-4.0463	-3.65153	-3.6045	-3.77361	0.198497	4	38.0218	4.00214e-05		SiJWB09ADH_pcr_1	0.655623	0.538609	0.723993	0.54558	0.615951	0.0897791	4	13.7215	0.000837578
SiJWC04ABR_pcr_2	-3.54823	-3.41447	-4.21883	-3.89839	-3.76998	0.36218	4	20.8183	0.000242404		SiJWH04ACS_pcr_2	0.644694	0.6163	0.684733	0.519664	0.616348	0.0703037	4	17.5339	0.000404367
SiJWD11BBY_pcr_1	-3.26175	-3.95646	-4.02874	-3.78895	-3.75897	0.346366	4	21.7052	0.000214028		SiJWD02ADX_pcr_1	0.620888	0.522268	0.725499	0.602816	0.617868	0.0835853	4	14.7841	0.000671394
SiJWA11CAF_pcr_1	-3.81621	-4.12022	-3.44215	-3.6373	-3.75397	0.288013	4	26.0681	0.000123836		SiJWD07CAC_pcr_1	0.606802	0.668969	0.496233	0.711375	0.620845	0.0935182	4	13.2775	0.000923257
SiJWC08ACJ_pcr_2	-3.50364	-3.65857	-4.01039	-3.76589	-3.73462	0.213045	4	35.0595	5.10249e-05		SiJWB06BDA_pcr_1	0.573801	0.652423	0.632735	0.630158	0.62228	0.0338139	4	36.8062	4.4112e-05
SiJWF02ADY_pcr_1	-3.63418	-3.65518	-3.79056	-3.85731	-3.73431	0.107364	4	69.5635	6.54641e-06		SiJWB03BAE_pcr_1	0.54027	0.618106	0.660984	0.693396	0.628189	0.0662293	4	18.9701	0.00031984
SiJWG07ADA_pcr_1	-3.21257	-3.29734	-4.23817	-4.18703	-3.73378	0.554371	4	13.4703	0.000884678		SiJWA09ACV_pcr_2	0.559401	0.634882	0.58315	0.741397	0.629707	0.0808538	4	15.5765	0.000574987
SiJWG12BCV_pcr_1	-3.26469	-3.46331	-4.05293	-4.14165	-3.73064	0.432578	4	17.2484	0.000424614		SiJWF08ABI_pcr_2	0.620282	0.592648	0.693472	0.620516	0.63173	0.0431906	4	29.2531	8.77266e-05
SiJWF06ADA_pcr_1	-4.18366	-3.79666	-3.3904	-3.54225	-3.72824	0.346801	4	21.5007	0.00022016		SiJWB04ADA_pcr_1	0.701962	0.623897	0.623079	0.582205	0.632785	0.0500567	4	25.2827	0.000135693
SiJWH11ACR_pcr_2	-3.21149	-3.74142	-3.91041	-3.99906	-3.7156	0.352652	4	21.0723	0.000233789		SiJWG08BBK_pcr_1	0.63605	0.635313	0.538024	0.736658	0.636511	0.0810986	4	15.6972	0.000561944
SiJWB06ABN_pcr_2	-3.36123	-3.59	-3.9812	-3.84896	-3.69535	0.275707	4	26.8063	0.000113917		SiJWH11ADD_pcr_1	0.58492	0.617264	0.739338	0.610236	0.63794	0.0690113	4	18.488	0.000345341
SiJWH01BBY_pcr_1	-3.24938	-3.17911	-4.16945	-4.13116	-3.68228	0.541421	4	13.6023	0.000859509		SiJWH08BBL_pcr_1	0.573611	0.714694	0.591452	0.675768	0.638881	0.0673747	4	18.965	0.000320097
SiJWD10BCO_pcr_1	-3.33967	-3.29337	-4.03668	-4.05247	-3.68055	0.42082	4	17.4923	0.000407236		SiJWG10ACX_pcr_1	0.516394	0.664633	0.682429	0.694632	0.639522	0.0830043	4	15.4094	0.000593704
SiJWC08BDB_pcr_1	-3.23758	-3.32514	-4.16912	-3.96404	-3.67397	0.462397	4	15.891	0.000541828		SiJWA09AAD_pcr_2	0.708103	0.720875	0.54825	0.582339	0.639892	0.0874102	4	14.6411	0.000691037
SiJWH08CAJ_pcr_1	-3.70472	-4.08729	-3.33113	-3.53211	-3.66381	0.320953	4	22.8308	0.000184041		SiJWD05AAN_pcr_2	0.57924	0.607457	0.634398	0.739647	0.640186	0.0700274	4	18.2839	0.000356952
SiJWA07BAM_pcr_1	-3.11761	-3.23974	-4.05694	-4.21709	-3.65784	0.559374	4	13.0783	0.000965486		SiJWG08ACW_pcr_2	0.60712	0.76555	0.601098	0.605103	0.644718	0.0805939	4	15.9992	0.000531012
SiJWF01CAE_pcr_1	-3.64995	-3.33602	-3.69358	-3.91622	-3.64894	0.238994	4	30.5359	7.7155e-05		SiJWF03ADY_pcr_1	0.671315	0.731255	0.55606	0.624993	0.645906	0.0740263	4	17.4507	0.00041013
SiJWD06ADZ_pcr_1	-3.79674	-3.81587	-3.41528	-3.54668	-3.64364	0.195492	4	37.2767	4.24654e-05		SiJWF08BBB_pcr_1	0.595191	0.594209	0.724284	0.68295	0.649158	0.0651094	4	19.9405	0.00027564
SiJWG05ACC_pcr_2	-3.12937	-3.31436	-4.12498	-4.00249	-3.6428	0.494421	4	14.7356	0.000677973		SiJWB06ACU_pcr_2	0.596832	0.691883	0.657149	0.652426	0.649572	0.0393163	4	33.0434	6.09236e-05
SiJWC08BDS_pcr_1	-3.65914	-3.35724	-3.78189	-3.75167	-3.63748	0.193987	4	37.5023	4.17049e-05		SiJWG05BDO_pcr_1	0.754436	0.671337	0.587083	0.5941	0.651739	0.0783867	4	16.6288	0.000473436
SiJWC04BDE_pcr_1	-3.17597	-3.20202	-3.84614	-4.31388	-3.6345	0.548829	4	13.2446	0.000930073		SiJWE08BBD_pcr_1	0.71358	0.667354	0.664843	0.56231	0.652022	0.0638673	4	20.418	0.000256858
SiJWA01ABD_pcr_2	-3.34203	-3.51435	-3.65453	-4.00037	-3.62782	0.27932	4	25.976	0.000125152		SiJWA10BBH_pcr_1	0.718903	0.582992	0.604899	0.702417	0.652303	0.0683086	4	19.0987	0.000313466
SiJWH11ACV_pcr_2	-3.28593	-3.39047	-3.88177	-3.91829	-3.61912	0.327506	4	22.1011	0.000202786		SiJWB03AAB_pcr_2	0.672105	0.595624	0.656157	0.693592	0.654369	0.0420601	4	31.1159	7.29306e-05
SiJWF02ABH_pcr_2	-3.37377	-3.6576	-3.59989	-3.84369	-3.61874	0.19363	4	37.3779	4.2122e-05		SiJWD09BDM_pcr_1	0.717426	0.684871	0.642492	0.579779	0.656142	0.0594379	4	22.0782	0.000203413
SiJWD09BDH_pcr_1	-3.16996	-3.41529	-3.99719	-3.86706	-3.61238	0.38623	4	18.7058	0.000333495		SiJWB08BDC_pcr_1	0.709443	0.707316	0.640256	0.572095	0.657277	0.0652454	4	20.1479	0.000267267
SiJWC08BAM_pcr_1	-3.22453	-3.36983	-4.0028	-3.85063	-3.61195	0.373474	4	19.3424	0.000301839		SiJWF08ADV_pcr_1	0.620195	0.680283	0.57522	0.759983	0.65892	0.0799488	4	16.4836	0.000485952
SiJWD12BAD_pcr_1	-3.01812	-3.71238	-3.90352	-3.74127	-3.59382	0.392912	4	18.2932	0.000356407		SiJWB09BDC_pcr_1	0.693208	0.643298	0.580982	0.720697	0.659546	0.0613975	4	21.4845	0.000220658
SiJWH11AAB_pcr_2	-3.19573	-3.10962	-4.03259	-3.99082	-3.58219	0.4975	4	14.4007	0.000725818		SiJWD06AAZ_pcr_2	0.602723	0.560734	0.702052	0.777477	0.660746	0.0978117	4	13.5106	0.0008769
SiJWA08BCB_pcr_1	-3.03952	-3.17899	-4.11732	-3.98472	-3.58014	0.549373	4	13.0335	0.00097534		SiJWD05AAR_pcr_2	0.60363	0.590584	0.782446	0.6699	0.66164	0.0877047	4	15.0879	0.00063206
SiJWB04AAQ_pcr_2	-3.1178	-3.36072	-3.81019	-3.97387	-3.56564	0.395395	4	18.0359	0.00037177		SiJWF10BDW_pcr_2	0.642657	0.800964	0.597298	0.611013	0.662983	0.0939277	4	14.1169	0.000769954
SiJWD05ADO_pcr_1	-3.58539	-3.6895	-3.79305	-3.14067	-3.55215	0.287124	4	24.7429	0.000144733		SiJWG09AAH_pcr_2	0.79587	0.570355	0.598153	0.696399	0.665194	0.102533	4	12.9753	0.000988355
SiJWF12AAW_pcr_2	-3.1536	-3.19725	-3.79325	-4.01166	-3.53894	0.429489	4	16.4798	0.000486285		SiJWA01ABY_pcr_2	0.636006	0.722931	0.662938	0.640101	0.665494	0.0400824	4	33.2063	6.00334e-05
SiJWB07BAV_pcr_1	-3.39616	-3.4475	-3.49275	-3.77268	-3.52727	0.168293	4	41.9182	2.98796e-05		SiJWE11ABJ_pcr_2	0.63862	0.809795	0.646612	0.585763	0.670197	0.0969023	4	13.8324	0.000817831
SiJWC01BAU_pcr_1	-3.37202	-3.6089	-3.46373	-3.60479	-3.51236	0.115361	4	60.8933	9.75757e-06		SiJWE09BCN_pcr_1	0.616691	0.579935	0.687822	0.79877	0.670805	0.0963503	4	13.9243	0.000801949
SiJWB10ADU_pcr_1	-3.06076	-3.51427	-4.07012	-3.40135	-3.51163	0.419272	4	16.7511	0.000463232		SiJWA05BDB_pcr_1	0.76487	0.677299	0.559535	0.692744	0.673612	0.0850906	4	15.8328	0.000547764
SiJWA10BBW_pcr_1	-3.40896	-3.74828	-3.54514	-3.29455	-3.49923	0.195086	4	35.8738	4.7635e-05		SiJWH08BCB_pcr_1	0.678563	0.782078	0.569788	0.670621	0.675263	0.0867312	4	15.5714	0.000575542
SiJWB12BDH_pcr_1	-4.25328	-3.40088	-3.21757	-3.06643	-3.48454	0.530422	4	13.1387	0.000952416		SiJWC10ACK_pcr_2	0.657675	0.746416	0.666825	0.636507	0.676856	0.0480806	4	28.155	9.83634e-05
SiJWD03ADW_pcr_1	-3.64789	-3.46791	-3.38749	-3.40253	-3.47646	0.119503	4	58.1817	1.11854e-05		SiJWA07ABQ_pcr_2	0.702776	0.704867	0.752646	0.567733	0.682005	0.0795874	4	17.1385	0.000432766
SiJWD06ACG_pcr_2	-3.85256	-3.06319	-3.69102	-3.27857	-3.47133	0.363929	4	19.077	0.000314531		SiJWF07BAO_pcr_1	0.666471	0.779644	0.736972	0.555567	0.684664	0.0979022	4	13.9867	0.000791392
SiJWD01BBW_pcr_1	-3.28647	-3.47028	-3.67115	-3.42265	-3.46264	0.159339	4	43.4626	2.68099e-05		SiJWF12ACC_pcr_2	0.653524	0.762207	0.603131	0.720734	0.684899	0.070548	4	19.4165	0.000298417
SiJWA03BDL_pcr_1	-3.04136	-2.961	-3.92421	-3.90557	-3.45804	0.528604	4	13.0837	0.000964326		SiJWA09BCT_pcr_1	0.805303	0.727486	0.594394	0.614084	0.685317	0.0991899	4	13.8183	0.000820315
SiJWD07ABL_pcr_2	-3.65956	-3.51856	-3.25212	-3.34873	-3.44474	0.180664	4	38.1343	3.9669e-05		SiJWB01BCX_pcr_1	0.602985	0.69921	0.718251	0.729465	0.687478	0.0576961	4	23.831	0.000161919
SiJWG08BDK_pcr_1	-3.2771	-3.05622	-3.88912	-3.51547	-3.43448	0.356422	4	19.272	0.000305139		SiJWD04BCX_pcr_1	0.820967	0.673346	0.656681	0.605707	0.689175	0.0924526	4	14.9087	0.000654877
SiJWC05BBK_pcr_1	-2.94198	-3.18479	-3.73876	-3.84352	-3.42726	0.433815	4	15.8006	0.000551095		SiJWA09ADI_pcr_1	0.829294	0.691596	0.65382	0.588088	0.690699	0.101815	4	13.5678	0.000865995
SiJWH03ACK_pcr_2	-3.08357	-3.16074	-3.51002	-3.79585	-3.38754	0.329424	4	20.5664	0.000251368		SiJWA03BCT_pcr_1	0.781732	0.613135	0.701309	0.670147	0.691581	0.070321	4	19.6693	0.000287131
SiJWH11ABU_pcr_2	-2.95242	-3.00429	-3.77937	-3.7873	-3.38085	0.465245	4	14.5336	0.000706315		SiJWE11BCK_pcr_1	0.748427	0.586269	0.773264	0.670801	0.69469	0.0844342	4	16.4552	0.000488448
SiJWA08ACJ_pcr_2	-3.12812	-3.54247	-3.39939	-3.41113	-3.37028	0.17398	4	38.7434	3.78302e-05		SiJWA12BDN_pcr_1	0.663117	0.695347	0.586092	0.838806	0.695841	0.105759	4	13.1589	0.000948097
SiJWB05ABU_pcr_2	-2.78558	-3.19702	-3.60196	-3.88296	-3.36688	0.479015	4	14.0575	0.000779632		SiJWF12BDK_pcr_1	0.631164	0.65004	0.803908	0.711434	0.699136	0.077801	4	17.9724	0.000375691
SiJWB06BBV_pcr_1	-2.90777	-3.03095	-3.76269	-3.7213	-3.35568	0.449223	4	14.9399	0.000650829		SiJWG02BBH_pcr_1	0.706036	0.706075	0.704557	0.6822	0.699717	0.0116995	4	119.615	1.28827e-06
SiJWB10ACT_pcr_2	-3.35289	-3.50132	-2.80707	-3.75015	-3.35286	0.39907	4	16.8034	0.000458958		SiJWA08ADV_pcr_1	0.587488	0.671847	0.845985	0.699861	0.701295	0.107636	4	13.0309	0.000975923
SiJWA10ADK_pcr_1	-3.36758	-3.78296	-3.15726	-3.0618	-3.3424	0.320284	4	20.8715	0.000240565		SiJWB01BDW_pcr_2	0.748806	0.778655	0.553805	0.725318	0.701646	0.100948	4	13.9011	0.000805918
SiJWG08BCK_pcr_1	-3.47076	-3.37528	-3.15424	-3.35678	-3.33927	0.133079	4	50.1849	1.74233e-05		SiJWD12CAI_pcr_1	0.692381	0.777648	0.635779	0.707529	0.703334	0.0583777	4	24.096	0.000156657
SiJWE09ADM_pcr_1	-3.14793	-3.21102	-3.33121	-3.63463	-3.33119	0.216103	4	30.8296	7.49761e-05		SiJWH12ABM_pcr_2	0.69552	0.619383	0.729719	0.78692	0.707886	0.0700209	4	20.2193	0.000264462
SiJWC01BDU_pcr_1	-2.72129	-3.4126	-3.46605	-3.69148	-3.32286	0.418855	4	15.8664	0.00054433		SiJWG09ACE_pcr_2	0.759734	0.684491	0.656775	0.744301	0.711325	0.0487394	4	29.1889	8.83046e-05
SiJWD11BBI_pcr_1	-3.70822	-3.12382	-3.21185	-3.19916	-3.31076	0.267807	4	24.725	0.000145048		SiJWA02BCU_pcr_1	0.735085	0.580865	0.749338	0.782145	0.711858	0.089524	4	15.9032	0.000540594
SiJWH06AAG_pcr_2	-3.64497	-3.78912	-2.84309	-2.95563	-3.3082	0.477957	4	13.8431	0.000815965		SiJWH08BCH_pcr_1	0.668014	0.667831	0.747109	0.769961	0.713229	0.0531407	4	26.8431	0.000113451
SiJWG08ABE_pcr_2	-3.42758	-3.70544	-2.88778	-3.18951	-3.30258	0.347737	4	18.9947	0.000318609		SiJWE04BAE_pcr_1	0.660008	0.642151	0.724066	0.83751	0.715934	0.0883526	4	16.2063	0.000511092
SiJWA03ABV_pcr_2	-3.62199	-3.72085	-2.84896	-2.92644	-3.27956	0.455378	4	14.4037	0.000725381		SiJWH03ADS_pcr_1	0.688336	0.842652	0.593692	0.748067	0.718187	0.104522	4	13.7423	0.000833825
SiJWG01AEA_pcr_1	-3.57405	-3.47048	-2.95227	-3.10079	-3.2744	0.295607	4	22.1537	0.000201351		SiJWF12BCU_pcr_1	0.815838	0.668443	0.711361	0.678178	0.718455	0.0674714	4	21.2966	0.000226519
SiJWA01BAI_pcr_2	-2.86733	-3.13714	-3.33853	-3.65892	-3.25048	0.333781	4	19.4767	0.000295677		SiJWB01BCQ_pcr_1	0.840717	0.758422	0.595056	0.680519	0.718679	0.105217	4	13.6609	0.000848626
SiJWG12BCZ_pcr_1	-3.28409	-3.45647	-3.34734	-2.81959	-3.22687	0.2807	4	22.9916	0.000180223		SiJWH01BCE_pcr_1	0.747647	0.741547	0.687788	0.700871	0.719463	0.0296143	4	48.589	1.91954e-05
SiJWB06ADY_pcr_newprimers	-3.11986	-3.71186	-2.73797	-3.29784	-3.21688	0.404279	4	15.9142	0.000539483		SiJWA01BBC_pcr_1	0.709805	0.71351	0.707249	0.759983	0.722637	0.0250297	4	57.7424	1.14424e-05
SiJWH03BCT_pcr_1	-2.90899	-2.93959	-3.1112	-3.89963	-3.21485	0.465109	4	13.8241	0.000819298		SiJWC02BCY_pcr_1	0.72411	0.717461	0.839576	0.621604	0.725688	0.0892077	4	16.2696	0.0005052
SiJWB06ADY_pcr_1	-3.58429	-3.56997	-2.90134	-2.80355	-3.21479	0.420338	4	15.2962	0.000606845		SiJWA08BCF_pcr_1	0.593817	0.811128	0.679735	0.827912	0.728148	0.111396	4	13.0731	0.000966626
SiJWC04AAP_pcr_2	-2.79841	-2.85293	-3.53622	-3.66034	-3.21197	0.449485	4	14.2918	0.000742348		SiJWB09BCO_pcr_1	0.725212	0.801955	0.804856	0.586245	0.729567	0.102418	4	14.2468	0.000749323
SiJWD05ADD_pcr_1	-2.91316	-3.10638	-3.64182	-3.18193	-3.21082	0.30882	4	20.7941	0.000243245		SiJWG01ABC_pcr_2	0.612244	0.775618	0.79447	0.739502	0.730459	0.0820433	4	17.8067	0.000386202
SiJWF02BDM_pcr_1	-2.74678	-3.29037	-3.26377	-3.43698	-3.18448	0.301572	4	21.1192	0.000232244		SiJWB02AAO_pcr_2	0.82408	0.674142	0.65762	0.767346	0.730797	0.0787445	4	18.5612	0.000341296
SiJWD05ADE_pcr_1	-3.43117	-3.57552	-2.85836	-2.8636	-3.18216	0.375526	4	16.9477	0.000447424		SiJWE04CAR_pcr_1	0.743423	0.704447	0.676991	0.801605	0.731616	0.054037	4	27.0784	0.000110529
SiJWD04ACO_pcr_2	-2.97476	-3.06687	-3.5637	-3.12217	-3.18187	0.261711	4	24.3159	0.000152461		SiJWC06ADZ_pcr_1	0.692589	0.632498	0.794794	0.809316	0.732299	0.0844083	4	17.3514	0.000417159
SiJWD04ADP_pcr_1	-3.57158	-3.54331	-2.83989	-2.76672	-3.18038	0.43658	4	14.5695	0.000701165		SiJWD09AAA_pcr_1	0.701046	0.721088	0.77264	0.745897	0.735168	0.0309939	4	47.4395	2.06232e-05
SiJWG06BAH_pcr_2	-3.00062	-2.96111	-3.47166	-3.24085	-3.16856	0.236878	4	26.7527	0.000114601		SiJWH05BCS_pcr_1	0.751503	0.820106	0.644559	0.724954	0.735281	0.0725618	4	20.2663	0.000262635
SiJWD06AAR_pcr_2	-3.4248	-3.35347	-2.87933	-3.01587	-3.16837	0.262563	4	24.1341	0.000155919		SiJWC07BBR_pcr_1	0.785674	0.703932	0.789293	0.669717	0.737154	0.0597891	4	24.6585	0.00014622
SiJWF12CAM_pcr_1	-2.85788	-2.88512	-3.40768	-3.50481	-3.16387	0.340105	4	18.6053	0.000338895		SiJWB03ADG_pcr_1	0.822046	0.762257	0.69141	0.673928	0.73741	0.0681336	4	21.646	0.00021578
SiJWA09BDD_pcr_1	-2.60086	-2.95283	-3.63376	-3.42721	-3.15367	0.465919	4	13.5374	0.000871761		SiJWD11ACF_pcr_2	0.755016	0.639066	0.735124	0.848885	0.744523	0.0860445	4	17.3055	0.000420455
SiJWG09CAL_pcr_1	-3.48363	-3.64132	-2.7607	-2.71306	-3.14968	0.481379	4	13.0861	0.000963801		SiJWD06ACH_pcr_2	0.784105	0.836257	0.684638	0.681099	0.746524	0.076539	4	19.507	0.000294309
SiJWE06BBI_pcr_1	-3.06378	-3.17256	-3.19036	-3.16825	-3.14874	0.057441	4	109.634	1.67304e-06		SiJWF06BCM_pcr_1	0.668635	0.821454	0.821628	0.679855	0.747893	0.0851645	4	17.5635	0.00040234
SiJWH10AAY_pcr_1	-2.86662	-3.17812	-3.10343	-3.38639	-3.13364	0.214534	4	29.2135	8.80825e-05		SiJWD09AAA_pcr_2	0.668663	0.808235	0.793549	0.727553	0.7495	0.0643074	4	23.3099	0.000172973
SiJWD07ABN_pcr_2	-3.17325	-3.29307	-3.1501	-2.90024	-3.12916	0.164977	4	37.9345	4.02979e-05		SiJWE08BCS_pcr_1	0.859068	0.762649	0.739362	0.637886	0.749741	0.090808	4	16.5127	0.000483409
SiJWD05CAB_pcr_1	-3.26031	-3.26567	-2.92363	-3.04531	-3.12373	0.168318	4	37.1169	4.30152e-05		SiJWA03ADW_pcr_1	0.613312	0.778025	0.874526	0.736404	0.750567	0.108258	4	13.8663	0.000811925
SiJWA01ABE_pcr_2	-3.03914	-2.60999	-3.53821	-3.29664	-3.121	0.396968	4	15.7242	0.000559088		SiJWB06ACA_pcr_2	0.806054	0.826991	0.663888	0.706358	0.750823	0.0782879	4	19.1811	0.00030947
SiJWF11CAK_pcr_1	-3.04011	-3.39389	-3.03947	-2.99956	-3.11826	0.184731	4	33.7599	5.71342e-05		SiJWA08CAS_pcr_1	0.740668	0.619928	0.812991	0.839651	0.75331	0.0982638	4	15.3324	0.000602601
SiJWB03BEA_pcr_2	-2.98309	-3.12587	-3.30852	-3.0538	-3.11782	0.139858	4	44.5855	2.48373e-05		SiJWB03BCY_pcr_1	0.748207	0.691072	0.823539	0.759061	0.75547	0.0543021	4	27.8247	0.000101897
SiJWB03BDX_pcr_1	-2.73122	-3.0032	-3.25853	-3.44008	-3.10826	0.308701	4	20.1377	0.00026767		SiJWA07AAR_pcr_2	0.601642	0.747654	0.820095	0.857711	0.756776	0.113059	4	13.3872	0.000901035
SiJWB09BDT_pcr_1	-3.22673	-3.30065	-3.00503	-2.84039	-3.0932	0.210202	4	29.4307	8.61519e-05		SiJWA03BAW_pcr_1	0.805674	0.9014	0.692466	0.638892	0.759608	0.117342	4	12.9469	0.000994774
SiJWA11BCJ_pcr_1	-3.07799	-3.00197	-3.41052	-2.86391	-3.0886	0.232188	4	26.6042	0.000116524		SiJWF12ADY_pcr_newprimers	0.842492	0.600002	0.772228	0.828394	0.760779	0.111399	4	13.6586	0.000849049
SiJWE03ACQ_pcr_2	-3.12493	-3.08441	-3.18435	-2.9588	-3.08812	0.0954857	4	64.6824	8.14214e-06		SiJWH02ADC_pcr_1	0.686798	0.707245	0.796944	0.867092	0.76452	0.0834536	4	18.322	0.000354741
SiJWE04CAH_pcr_1	-3.18177	-3.63324	-2.75631	-2.75472	-3.08151	0.419132	4	14.7043	0.000682273		SiJWG05ABQ_pcr_2	0.78664	0.632854	0.8253	0.817236	0.765508	0.08999	4	17.0132	0.000442322
SiJWG12BDG_pcr_1	-3.38205	-2.81239	-3.24497	-2.88379	-3.0808	0.276016	4	22.3233	0.000196818		SiJWA03BCY_pcr_1	0.621967	0.868306	0.844247	0.730442	0.766241	0.113429	4	13.5104	0.000876925
SiJWC09BAE_pcr_1	-2.64535	-2.82125	-3.69249	-3.13476	-3.07346	0.459654	4	13.3729	0.000903892		SiJWE11ABI_pcr_2	0.624181	0.771417	0.798511	0.914201	0.777077	0.119264	4	13.0312	0.000975851
SiJWD06ABD_pcr_2	-3.52092	-2.96908	-2.86848	-2.87498	-3.05836	0.311775	4	19.6191	0.000289327		SiJWD09CAB_pcr_1	0.724796	0.891153	0.698167	0.804967	0.779771	0.087029	4	17.9198	0.000378987
SiJWA05ADK_pcr_1	-2.46762	-3.17794	-3.33984	-3.20779	-3.0483	0.393459	4	15.4949	0.000584026		SiJWA08BDM_pcr_1	0.644947	0.811586	0.90794	0.76146	0.781483	0.109454	4	14.2797	0.000744223
SiJWE10AAS_pcr_2	-2.73364	-2.77154	-3.3315	-3.30493	-3.0354	0.32711	4	18.5589	0.000341425		SiJWG06BDN_pcr_1	0.689398	0.804446	0.749075	0.899443	0.78559	0.0892642	4	17.6015	0.000399761
SiJWF04BBA_pcr_1	-2.92619	-2.78246	-3.35926	-3.05731	-3.0313	0.245766	4	24.6682	0.000146048		SiJWD10ADU_pcr_1	0.68477	0.752628	0.771371	0.945567	0.788584	0.111071	4	14.1996	0.000756729
SiJWC03ABI_pcr_2	-2.96612	-3.16188	-2.83919	-3.12879	-3.024	0.149998	4	40.3205	3.35686e-05		SiJWB09ACC_pcr_2	0.808529	0.877602	0.798972	0.670099	0.7888	0.0865418	4	18.2293	0.000360141
SiJWE05BAA_pcr_2	-2.7773	-2.8587	-3.12469	-3.32512	-3.02145	0.250979	4	24.0774	0.00015702		SiJWE02ACG_pcr_2	0.69408	0.899717	0.827043	0.741557	0.790599	0.0912067	4	17.3364	0.000418229
SiJWE12AAA_pcr_2	-3.12472	-3.03147	-2.89418	-3.02996	-3.02008	0.0949163	4	63.6368	8.54989e-06		SiJWB11BBY_pcr_1	0.697204	0.816763	0.822946	0.8389	0.793953	0.0651701	4	24.3655	0.000151536
SiJWG03BBF_pcr_1	-2.66494	-2.72143	-3.31501	-3.3421	-3.01087	0.367718	4	16.376	0.000495508		SiJWE07CAU_pcr_1	0.799837	0.664085	0.858676	0.858928	0.795382	0.0918386	4	17.3213	0.000419318
SiJWH04ACE_pcr_2	-2.59717	-2.77645	-3.21895	-3.43081	-3.00585	0.38542	4	15.5978	0.000572655		SiJWA11ABF_pcr_2	0.679548	0.760148	0.92844	0.814375	0.795628	0.104441	4	15.2359	0.000614006
SiJWA07BDX_pcr_1	-2.59794	-2.65649	-3.51655	-3.17346	-2.98611	0.438101	4	13.6321	0.000853958		SiJWB06AAL_pcr_2	0.8885	0.814286	0.680102	0.805219	0.797027	0.0864172	4	18.446	0.000347685
SiJWB12ADJ_pcr_1	-2.6866	-2.71344	-3.25239	-3.27329	-2.98143	0.32524	4	18.3337	0.000354069		SiJWE11ADI_pcr_1	0.838705	0.789124	0.650015	0.920895	0.799685	0.113618	4	14.0768	0.000776477
SiJWD04BDT_pcr_1	-2.8401	-3.26088	-3.0365	-2.77997	-2.97936	0.217308	4	27.4206	0.000106454		SiJWF11BAE_pcr_1	0.788847	0.818919	0.796552	0.805506	0.802456	0.012915	4	124.267	1.14895e-06
SiJWC09BAG_pcr_2	-2.5839	-2.72454	-3.33047	-3.25845	-2.97434	0.37523	4	15.8534	0.00054565		SiJWA08ACO_pcr_2	0.813428	0.648725	0.811433	0.938562	0.803037	0.118824	4	13.5164	0.000875785
SiJWH10AAY_pcr_2	-2.72144	-3.02616	-3.10865	-3.03763	-2.97347	0.171936	4	34.588	5.31358e-05		SiJWH11BCH_pcr_1	0.7744	0.700449	0.919839	0.826482	0.805293	0.0922249	4	17.4637	0.000409225
SiJWH03BBP_pcr_1	-3.07305	-3.12928	-2.94174	-2.74276	-2.97171	0.17167	4	34.621	5.29843e-05		SiJWE08ADA_pcr_1	0.726262	0.940732	0.784571	0.773239	0.806201	0.093172	4	17.3057	0.000420446
SiJWB11CAI_pcr_1	-3.06831	-2.77049	-2.9796	-3.02331	-2.96043	0.131703	4	44.9561	2.42288e-05		SiJWG07BAX_pcr_1	0.821524	0.82323	0.912866	0.678007	0.808907	0.0971367	4	16.655	0.000471223
SiJWD02BAR_pcr_1	-2.77119	-2.90466	-3.02607	-3.0904	-2.94808	0.140844	4	41.8631	2.99975e-05		SiJWA02ACT_pcr_2	0.760832	0.816294	0.78374	0.886374	0.81181	0.0546703	4	29.6984	8.38499e-05
SiJWG08BDD_pcr_1	-3.01706	-2.50699	-3.07147	-3.19585	-2.94784	0.303279	4	19.4398	0.000297352		SiJWG09BDI_pcr_1	0.792496	0.802622	0.88662	0.76745	0.812297	0.051707	4	31.4192	7.08438e-05
SiJWH03ADO_pcr_1	-3.21636	-3.18151	-2.82497	-2.53821	-2.94026	0.321128	4	18.3121	0.000355314		SiJWD04BEA_pcr_1	0.933049	0.866983	0.75822	0.692193	0.812611	0.10789	4	15.0637	0.000635075
SiJWD12ABT_pcr_2	-2.98378	-3.36288	-2.55498	-2.80683	-2.92712	0.339635	4	17.2368	0.000425462		SiJWH12BDY_pcr_1	0.783893	0.797253	0.782228	0.893462	0.814209	0.0532613	4	30.5741	7.68667e-05
SiJWG05CAC_pcr_1	-2.79547	-2.5113	-3.17658	-3.20265	-2.9215	0.330785	4	17.664	0.000395562		SiJWA02ABZ_pcr_2	0.882574	0.710146	0.762788	0.903313	0.814705	0.0932479	4	17.474	0.000408507
SiJWB01BAS_pcr_1	-2.92942	-3.11054	-2.82978	-2.79329	-2.91576	0.142029	4	41.0587	3.17928e-05		SiJWA08BCE_pcr_1	0.745121	0.736692	0.927208	0.853945	0.815742	0.0915067	4	17.8291	0.000384756
SiJWA07AAC_pcr_1	-2.86867	-3.07003	-2.90209	-2.8003	-2.91027	0.114623	4	50.78	1.68184e-05		SiJWD09BDZ_pcr_1	0.80002	0.840449	0.805693	0.817451	0.815903	0.0179018	4	91.1534	2.91047e-06
SiJWC04BCF_pcr_1	-2.54357	-3.03806	-2.8506	-3.17903	-2.90282	0.274693	4	21.135	0.000231726		SiJWE10BCH_pcr_1	0.849904	0.917153	0.792251	0.718347	0.819414	0.0845279	4	19.388	0.000299728
SiJWH02BCA_pcr_1	-3.04684	-3.00428	-2.95127	-2.604	-2.9016	0.202217	4	28.6979	9.29018e-05		SiJWF08ABH_pcr_2	0.888163	0.731607	0.904086	0.756579	0.820109	0.0886041	4	18.5118	0.00034402
SiJWA03AAK_pcr_2	-2.5776	-2.6252	-3.41193	-2.97952	-2.89856	0.38637	4	15.0041	0.0006426		SiJWE11ABY_pcr_2	0.88854	0.789083	0.81725	0.825714	0.830147	0.0419605	4	39.568	3.55172e-05
SiJWD01CAQ_pcr_1	-2.72254	-3.42527	-2.70152	-2.72165	-2.89274	0.355149	4	16.2903	0.000503296		SiJWH05BDD_pcr_1	0.858431	0.740274	0.915501	0.817129	0.832834	0.0737181	4	22.5951	0.000189834
SiJWF11BBI_pcr_1	-2.74359	-3.22293	-2.79286	-2.80535	-2.89118	0.222766	4	25.9571	0.000125425		SiJWE06ABI_pcr_2	0.704837	0.790376	0.881712	0.966074	0.83575	0.112981	4	14.7946	0.000669987
SiJWG03BDH_pcr_1	-2.58781	-2.86825	-3.15933	-2.93331	-2.88717	0.235355	4	24.5346	0.000148437		SiJWD04BBO_pcr_1	0.932873	0.700817	0.869101	0.846163	0.837239	0.0980675	4	17.0747	0.000437595
SiJWD03ACA_pcr_2	-2.62035	-2.46743	-3.30679	-3.13952	-2.88352	0.402939	4	14.3124	0.000739179		SiJWE12BCS_pcr_1	0.818672	0.996493	0.861982	0.692705	0.842463	0.1253	4	13.4472	0.000889195
SiJWH10BCS_pcr_1	-2.64887	-2.55888	-2.92684	-3.39259	-2.88179	0.374819	4	15.377	0.000597424		SiJWH10BAL_pcr_1	0.701396	0.78588	0.963294	0.927801	0.844593	0.122428	4	13.7973	0.000824009
SiJWH03BCW_pcr_1	-3.24693	-2.54242	-3.09239	-2.64231	-2.88102	0.341664	4	16.8646	0.000454018		SiJWC04CAC_pcr_1	0.749658	0.802172	0.971351	0.862503	0.846421	0.0951964	4	17.7826	0.000387758
SiJWH02AAX_pcr_2	-2.73143	-2.32307	-3.17852	-3.26378	-2.8742	0.435319	4	13.205	0.000938339		SiJWD03ADG_pcr_1	0.858544	0.952385	0.793252	0.792887	0.849267	0.0753564	4	22.54	0.000191222
SiJWB12AAS_pcr_2	-2.83977	-2.87084	-2.58128	-3.14944	-2.86033	0.232372	4	24.6186	0.000146929		SiJWH11BDU_pcr_1	0.752138	0.881359	0.788499	0.982382	0.851094	0.103058	4	16.5167	0.000483055
SiJWC05ABV_pcr_2	-2.64024	-2.68383	-3.07803	-3.02498	-2.85677	0.226599	4	25.2143	0.000136797		SiJWH07ADW_pcr_1	0.770861	0.723434	0.997394	0.912991	0.85117	0.126451	4	13.4625	0.000886206
SiJWH01ADK_pcr_1	-2.77662	-2.67853	-2.98501	-2.98595	-2.85653	0.154191	4	37.0518	4.3242e-05		SiJWF09BBI_pcr_1	0.782944	0.984759	0.709929	0.941882	0.854878	0.129902	4	13.1619	0.000947459
SiJWE03BAU_pcr_1	-2.52272	-2.88965	-2.89076	-3.03621	-2.83483	0.219164	4	25.8696	0.000126699		SiJWA05BCK_pcr_1	0.896949	0.717631	0.854347	0.956557	0.856371	0.101549	4	16.8661	0.000453896
SiJWE12BCH_pcr_1	-2.32122	-2.92277	-3.11845	-2.95922	-2.83042	0.349935	4	16.1768	0.000513865		SiJWD03AAC_pcr_1	0.936907	0.836394	0.94235	0.715911	0.857891	0.106454	4	16.1176	0.000519501
SiJWG10BAO_pcr_1	-2.64509	-2.47534	-3.09587	-3.07909	-2.82385	0.312281	4	18.0853	0.000368752		SiJWG04BBH_pcr_1	0.777264	0.753187	0.871426	1.03915	0.860256	0.129715	4	13.2638	0.000926078
SiJWC05ACG_pcr_2	-2.53013	-2.66893	-3.10863	-2.95576	-2.81586	0.26364	4	21.3615	0.000224472		SiJWD10CAP_pcr_1	0.844751	0.992703	0.864173	0.743833	0.861365	0.102221	4	16.853	0.000454948
SiJWA09ABL_pcr_2	-2.73516	-2.65786	-2.99624	-2.85553	-2.8112	0.147764	4	38.0497	3.99336e-05		SiJWB06BAG_pcr_2	0.767258	0.88872	0.961091	0.833414	0.862621	0.0823096	4	20.9604	0.000237534
SiJWG10BDR_pcr_1	-2.35357	-2.71684	-3.21676	-2.9213	-2.80212	0.362678	4	15.4524	0.000588809		SiJWH03ACO_pcr_2	0.945056	0.837039	0.835895	0.840277	0.864567	0.0536917	4	32.2049	6.57962e-05
SiJWA07AAC_pcr_2	-2.58068	-3.0486	-2.78083	-2.77753	-2.79691	0.192124	4	29.1157	8.89704e-05		SiJWH04ADS_pcr_1	0.84308	0.836208	1.00235	0.77667	0.864576	0.0965658	4	17.9065	0.000379827
SiJWG12CAR_pcr_1	-3.05541	-2.50507	-2.75731	-2.86223	-2.795	0.229358	4	24.3725	0.000151407		SiJWC09ADT_pcr_1	0.853156	0.876031	0.842215	0.887007	0.864602	0.0205326	4	84.2176	3.69013e-06
SiJWB11AAK_pcr_2	-2.81419	-2.89423	-2.66609	-2.76507	-2.78489	0.0954276	4	58.3666	1.10795e-05		SiJWA02ADG_pcr_1	0.93907	0.748473	0.935442	0.83712	0.865026	0.0909291	4	19.0264	0.00031703
SiJWF09CAB_pcr_1	-2.76339	-3.0853	-2.61373	-2.65416	-2.77914	0.213667	4	26.0137	0.000124611		SiJWG02CAH_pcr_1	0.772272	0.921163	0.836292	0.931169	0.865224	0.0751778	4	23.0181	0.000179606
SiJWA08BDL_pcr_1	-2.47148	-2.79084	-2.87296	-2.94326	-2.76964	0.208302	4	26.5925	0.000116678		SiJWF03BBD_pcr_1	0.847921	0.910649	0.751136	0.952518	0.865556	0.087557	4	19.7713	0.000282737
SiJWG08CAL_pcr_1	-2.75428	-2.96629	-2.4581	-2.88412	-2.7657	0.222867	4	24.8192	0.000143409		SiJWA10ADJ_pcr_1	0.961015	0.947394	0.747222	0.807338	0.865742	0.105202	4	16.4587	0.000488137
SiJWE08ACH_pcr_2	-2.92133	-2.73751	-2.75036	-2.63457	-2.76094	0.118818	4	46.4737	2.19344e-05		SiJWE02BDH_pcr_1	0.928449	0.734283	0.953365	0.858849	0.868736	0.0981547	4	17.7014	0.000393081
SiJWF08ADI_pcr_1	-2.50773	-2.44383	-3.09231	-2.9888	-2.75817	0.329834	4	16.7246	0.000465417		SiJWC07BDM_pcr_1	0.941547	0.826107	0.801563	0.912107	0.870331	0.0670865	4	25.9465	0.000125578
SiJWE08BAI_pcr_2	-2.71249	-3.2156	-2.45476	-2.64874	-2.7579	0.324227	4	17.0122	0.000442402		SiJWC10BAE_pcr_1	0.759048	0.844842	0.853481	1.02465	0.870506	0.111256	4	15.6488	0.000567129
SiJWE04AAP_pcr_2	-2.28762	-2.50284	-3.09481	-3.09873	-2.746	0.414456	4	13.2511	0.000928717		SiJWH08ADS_pcr_1	0.920298	0.887972	0.705836	0.974055	0.87204	0.116352	4	14.9897	0.000644438
SiJWH07CAM_pcr_1	-2.41584	-2.8815	-2.74331	-2.93666	-2.74433	0.233608	4	23.4951	0.000168932		SiJWF04ACT_pcr_2	0.948643	0.8302	0.878029	0.863655	0.880132	0.0498759	4	35.2929	5.00214e-05
SiJWD02AAP_pcr_2	-2.8385	-2.90455	-2.63629	-2.59769	-2.74426	0.15024	4	36.5316	4.51121e-05		SiJWC10AAE_pcr_2	0.839744	0.753028	0.939794	1.00011	0.883168	0.109092	4	16.1913	0.000512504
SiJWB03BEA_pcr_1	-2.68354	-2.6067	-2.64922	-3.02402	-2.74087	0.191366	4	28.6454	9.34125e-05		SiJWE01BDB_pcr_1	1.01944	0.797496	0.826593	0.897494	0.885255	0.0988226	4	17.9161	0.000379222
SiJWC10ACM_pcr_2	-2.29291	-2.57757	-3.09418	-2.98735	-2.738	0.370986	4	14.7607	0.000674561		SiJWA06ADS_pcr_1	0.870888	1.06488	0.786612	0.826491	0.887219	0.123344	4	14.3861	0.000728007
SiJWB01ABM_pcr_2	-2.69271	-2.28142	-2.88481	-3.08816	-2.73677	0.343837	4	15.919	0.000538998		SiJWF01AAJ_pcr_2	0.78561	0.840225	0.949387	0.974491	0.887428	0.0894683	4	19.8378	0.000279918
SiJWH09BBV_pcr_1	-2.66307	-2.84706	-2.51081	-2.90642	-2.73184	0.180127	4	30.3323	7.87151e-05		SiJWH01ACN_pcr_2	0.836997	0.945254	0.894769	0.87839	0.888853	0.0447757	4	39.7025	3.51582e-05
SiJWA09BDE_pcr_1	-2.29368	-2.70445	-3.11566	-2.80497	-2.72969	0.339301	4	16.0901	0.000522143		SiJWF03ACS_pcr_1	0.843679	0.898288	0.76406	1.05678	0.890703	0.12368	4	14.4034	0.000725428
SiJWC07BAH_pcr_2	-2.83731	-2.90123	-2.44766	-2.69097	-2.71929	0.201343	4	27.0116	0.000111348		SiJWA04BCY_pcr_1	0.778337	0.920729	0.802599	1.06332	0.891246	0.130493	4	13.6597	0.00084885
SiJWD11BAI_pcr_2	-2.70104	-2.92698	-2.60031	-2.58382	-2.70304	0.15803	4	34.2093	5.49167e-05		SiJWF10BCQ_pcr_1	0.879999	0.798334	0.868901	1.02174	0.892245	0.0936025	4	19.0646	0.000315142
SiJWD04ACA_pcr_2	-2.70697	-3.03986	-2.65629	-2.39111	-2.69855	0.266376	4	20.2613	0.000262831		SiJWD05ABN_pcr_2	0.815808	0.996376	0.779244	0.981865	0.893324	0.111777	4	15.984	0.000532508
SiJWG04ABK_pcr_2	-2.60055	-2.66239	-2.71477	-2.81436	-2.69802	0.0905279	4	59.6064	1.04029e-05		SiJWG07BCG_pcr_1	0.949291	0.805808	1.03274	0.80542	0.898315	0.112332	4	15.9939	0.00053153
SiJWE08CAG_pcr_1	-2.27584	-2.39681	-3.02032	-3.06397	-2.68923	0.410876	4	13.0903	0.000962891		SiJWA05CAW_pcr_1	0.897245	1.01565	0.90628	0.777092	0.899068	0.0975123	4	18.4401	0.000348019
SiJWC01ABK_pcr_2	-2.49806	-2.44862	-2.88892	-2.91713	-2.68818	0.249166	4	21.5774	0.000217833		SiJWD05BAV_pcr_1	0.946718	0.719413	0.912326	1.02431	0.900692	0.129611	4	13.8984	0.00080638
SiJWD05AA1_pcr_1	-2.18677	-2.60111	-2.92563	-3.02885	-2.68559	0.379212	4	14.1641	0.000762373		SiJWH04BCH_pcr_1	0.94357	1.00856	0.817981	0.834329	0.90111	0.0907718	4	19.8544	0.000279221
SiJWH03AEA_pcr_1	-2.54547	-3.02539	-2.29242	-2.84943	-2.67818	0.324708	4	16.4959	0.000484872		SiJWH02BCW_pcr_1	0.88207	0.971715	0.972378	0.785558	0.90293	0.0890053	4	20.2894	0.000261746
SiJWD08CAN_pcr_1	-2.57777	-2.6182	-2.46702	-3.03587	-2.67472	0.249107	4	21.4745	0.000220965		SiJWB12BDE_pcr_1	1.08953	0.834374	0.860707	0.833972	0.904645	0.123887	4	14.6043	0.000696214
SiJWE08CAG_pcr_1	-2.56045	-2.42183	-3.07628	-2.6305	-2.67226	0.28296	4	18.8879	0.000324006		SiJWG08CAO_pcr_1	0.856737	1.06336	0.843359	0.861049	0.906126	0.105091	4	17.2446	0.000424895
SiJWC03BAA_pcr_2	-2.42101	-2.64557	-2.74278	-2.85873	-2.66702	0.185718	4	28.7212	9.26765e-05		SiJWB05ACL_pcr_2	0.828379	0.779932	1.00812	1.01576	0.908046	0.121622	4	14.9323	0.000651814
SiJWB05BCV_pcr_1	-2.4751	-2.89788	-2.75416	-2.51798	-2.66128	0.19984	4	26.6341	0.000116134		SiJWF08AAC_pcr_2	0.829983	0.818188	0.9662	1.02121	0.908895	0.100587	4	18.0718	0.000369574
SiJWE01BCZ_pcr_1	-2.8803	-2.61787	-3.02447	-2.11568	-2.65958	0.399762	4	13.3058	0.000917455		SiJWG06BAZ_pcr_1	1.07785	0.867913	0.756079	0.939831	0.910418	0.134816	4	13.5061	0.000877769
SiJWD07BBF_pcr_1	-2.30306	-2.37615	-2.95057	-2.98543	-2.6538	0.364304	4	14.5692	0.000701212		SiJWD12CAJ_pcr_1	1.05945	0.816577	0.78633	0.982508	0.911217	0.131161	4	13.8946	0.000807031
SiJWB04ABT_pcr_2	-2.42479	-2.34753	-3.19429	-2.64359	-2.65255	0.382304	4	13.8766	0.000810134		SiJWE04ACK_pcr_2	0.842921	1.02595	0.795398	0.993539	0.914451	0.112511	4	16.2554	0.000506518
SiJWA11AAV_pcr_2	-2.63465	-2.80924	-2.84215	-2.25384	-2.63497	0.269908	4	19.525	0.000293504		SiJWH04BAU_pcr_1	0.922458	0.956237	0.948786	0.83145	0.914733	0.0573815	4	31.8825	6.78076e-05
SiJWG04CAD_pcr_1	-2.69325	-3.03157	-2.48087	-2.32643	-2.63303	0.305296	4	17.249	0.000424567		SiJWB03BCN_pcr_1	0.822643	1.07481	0.879746	0.909041	0.921559	0.108282	4	17.0215	0.000441676
SiJWE12AAA_pcr_1	-2.70319	-2.85049	-2.67887	-2.28971	-2.63056	0.239554	4	21.9622	0.000206639		SiJWA10ABF_pcr_2	0.87319	1.02038	0.937236	0.881345	0.928037	0.0678221	4	27.3668	0.000107082
SiJWA10BDD_pcr_1	-2.53677	-2.98328	-2.49705	-2.49559	-2.62817	0.237508	4	22.1313	0.000201962		SiJWH02BEA_pcr_2	0.919535	0.903241	1.00482	0.889453	0.929261	0.0518493	4	35.8447	4.77508e-05
SiJWD11AAX_pcr_2	-2.62189	-3.10743	-2.42271	-2.33228	-2.62108	0.34607	4	15.1477	0.000624682		SiJWA07BAR_pcr_1	0.942155	0.873024	1.08573	0.82016	0.930268	0.115054	4	16.1711	0.00051441
SiJWA08BDO_pcr_1	-2.43349	-2.70776	-2.71077	-2.60713	-2.61479	0.130106	4	40.1946	3.38845e-05		SiJWE11CAH_pcr_1	0.829199	0.885682	0.868381	1.14113	0.931097	0.141999	4	13.1141	0.000957718
SiJWC07ABT_pcr_2	-2.74292	-2.86273	-2.57002	-2.27152	-2.6118	0.256706	4	20.3485	0.000259482		SiJWE05BDI_pcr_1	0.854711	1.0786	0.893413	0.897798	0.93113	0.100199	4	18.5855	0.000339969
SiJWB02BCG_pcr_1	-2.10659	-2.44917	-2.95621	-2.89005	-2.60051	0.398836	4	13.0405	0.000973808		SiJWC01BAW_pcr_1	1.02771	0.970946	0.905804	0.826719	0.932795	0.0864978	4	21.5681	0.000218115
SiJWE07BDZ_pcr_1	-2.52653	-2.27329	-2.67077	-2.91497	-2.59639	0.268514	4	19.339	0.000302		SiJWE11ADW_pcr_1	0.832957	1.11072	0.869418	0.92774	0.935208	0.123347	4	15.1639	0.000622707
SiJWB09BBT_pcr_1	-2.60653	-2.5398	-2.94691	-2.28713	-2.59509	0.271906	4	19.0881	0.000313982		SiJWB11CAK_pcr_1	1.05036	1.03543	0.851057	0.805038	0.935471	0.125605	4	14.8955	0.000656606
SiJWH07BBA_pcr_1	-2.42488	-2.52547	-2.78479	-2.625	-2.59003	0.153401	4	33.7683	5.7092e-05		SiJWE05ABU_pcr_2	0.974928	1.11709	0.814583	0.847476	0.938518	0.137672	4	13.6341	0.000853577
SiJWB11ACB_pcr_2	-2.46151	-2.95775	-2.40384	-2.48879	-2.57797	0.255652	4	20.1679	0.000266478		SiJWH05ADY_pcr_newprimers	0.899413	0.957529	1.00254	0.904247	0.940932	0.0487861	4	38.5738	3.83305e-05
SiJWG12BCG_pcr_1	-2.23012	-2.55551	-2.59806	-2.90152	-2.5713	0.274721	4	18.7194	0.000332776		SiJWB07ABP_pcr_2	1.1093	1.00969	0.867541	0.783542	0.942519	0.145172	4	12.9849	0.000986185
SiJWD05BCC_pcr_1	-2.45588	-2.58768	-2.51601	-2.71407	-2.56841	0.11105	4	46.257	2.22438e-05		SiJWH06ACS_pcr_1	0.91313	0.930467	0.891202	1.05083	0.946408	0.0714465	4	26.4928	0.000117995
SiJWH09BDX_pcr_1	-2.63594	-2.70407	-2.50862	-2.38267	-2.55782	0.142116	4	35.9962	4.71516e-05		SiJWA12ABE_pcr_2	0.894948	0.926226	1.00924	0.956939	0.946839	0.0486965	4	38.8874	3.74121e-05
SiJWE08ADQ_pcr_1	-2.7997	-2.77439	-2.34533	-2.29735	-2.55419	0.269787	4	18.9349	0.000321618		SiJWE04BDI_pcr_1	1.0855	0.7676	0.892804	1.04278	0.947169	0.14546	4	13.0231	0.000977658
SiJWH03AAY_pcr_1	-2.30835	-2.597	-2.54638	-2.75607	-2.55195	0.18535	4	27.5366	0.00010512		SiJWH07ABD_pcr_2	0.97996	0.910475	1.12136	0.780369	0.948042	0.142109	4	13.3425	0.000910018
SiJWG10ADV_pcr_1	-2.2849	-2.39174	-2.83101	-2.66209	-2.54243	0.249418	4	20.3869	0.000258028		SiJWC01BDK_pcr_1	0.899737	1.04964	0.960272	0.882676	0.948082	0.0754504	4	25.1313	0.000138152
SiJWC03BDU_pcr_1	-2.32407	-2.6393	-2.47617	-2.69813	-2.53442	0.168762	4	30.0354	8.10662e-05		SiJWG07CAU_pcr_1	0.963772	0.896457	1.09535	0.841327	0.949226	0.10953	4	17.3328	0.000418493
SiJWA06BCX_pcr_1	-2.67635	-2.89608	-2.30034	-2.25768	-2.53261	0.30676	4	16.512	0.000483467		SiJWC12AAA_pcr_2	0.952328	0.830765	0.921582	1.09529	0.949991	0.109757	4	17.3109	0.000420068
SiJWB01BCL_pcr_1	-2.31377	-2.10196	-2.90171	-2.80379	-2.53031	0.384316	4	13.1678	0.000946198		SiJWD01ABT_pcr_2	0.834674	1.0621	1.00161	0.902269	0.950165	0.10134	4	18.752	0.000331052
SiJWB12AA1_pcr_1	-2.35762	-2.7289	-2.24292	-2.79175	-2.5303	0.270927	4	18.6788	0.000334937		SiJWB03AAR_pcr_2	1.06052	0.922182	0.975662	0.845669	0.951009	0.090422	4	21.0349	0.000235032
SiJWB05BDS_pcr_1	-2.40933	-2.17718	-2.64583	-2.87321	-2.52639	0.300113	4	16.8362	0.000456297		SiJWF05ABR_pcr_2	1.03555	1.07242	0.861332	0.83803	0.951833	0.119291	4	15.9582	0.000535072
SiJWH04AAC_pcr_1	-2.71262	-2.51849	-2.37284	-2.50042	-2.52609	0.140236	4	36.0264	4.70333e-05		SiJWG08AAB_pcr_1	0.965373	0.794387	0.994568	1.05319	0.951879	0.111163	4	17.1258	0.000433726
SiJWG02AAK_pcr_2	-2.36535	-2.35941	-2.72499	-2.59548	-2.51131	0.179926	4	27.9149	0.000100916		SiJWB05BDU_pcr_1	0.886805	1.03343	1.09682	0.793146	0.952549	0.137945	4	13.8105	0.000821681
SiJWC05ACS_pcr_2	-2.4295	-2.40206	-2.5259	-2.66965	-2.50678	0.120875	4	41.4772	3.08414e-05		SiJWE01BDL_pcr_1	0.990251	1.06303	0.954391	0.803722	0.952849	0.109209	4	17.45	0.000410183
SiJWG08ADW_pcr_1	-2.31241	-2.52128	-2.7342	-2.44729	-2.50379	0.176269	4	28.4088	9.57584e-05		SiJWF07CAN_pcr_1	0.973446	1.06191	0.902106	0.877679	0.953785	0.082745	4	23.0536	0.000178781
SiJWH02ACN_pcr_2	-2.36166	-2.65498	-2.21625	-2.72357	-2.48912	0.240266	4	20.7197	0.000245862		SiJWA12BDW_pcr_2	0.900607	1.13442	0.87901	0.903593	0.954407	0.120507	4	15.8399	0.000547035
SiJWE07BAK_pcr_2	-2.54797	-2.34182	-2.43231	-2.62761	-2.48743	0.125905	4	39.5128	3.56662e-05		SiJWB07ACV_pcr_2	1.11763	0.945729	0.866232	0.895975	0.956391	0.112383	4	17.0202	0.000441783
SiJWB05ABK_pcr_2	-2.30913	-2.39987	-2.75588	-2.48053	-2.48635	0.192844	4	25.7861	0.000127928		SiJWH02BAZ_pcr_1	0.919628	1.07316	0.90085	0.934905	0.957135	0.0785924	4	24.357	0.000151695
SiJWH10ACM_pcr_2	-2.085	-2.33199	-2.72574	-2.77719	-2.47998	0.329971	4	15.0315	0.000639124		SiJWF12ACM_pcr_2	0.977866	0.816386	1.13226	0.918561	0.961269	0.132072	4	14.5567	0.000702991
SiJWE03ADI_pcr_1	-2.31968	-2.35267	-2.76752	-2.45305	-2.47323	0.204229	4	24.2202	0.000154269		SiJWF06CAL_pcr_1	0.979192	0.99011	0.988924	0.888544	0.961692	0.0490106	4	39.2442	3.64023e-05
SiJWE06BBO_pcr_1	-2.77717	-2.47393	-2.36423	-2.24415	-2.46487	0.228374	4	21.5863	0.000217566		SiJWA01BAU_pcr_1	0.911972	0.91768	0.997254	1.02018	0.961771	0.0550593	4	34.9359	5.15676e-05
SiJWB04ADS_pcr_1	-2.33836	-2.24095	-2.65818	-2.62113	-2.46466	0.206505	4	23.8702	0.000161125		SiJWB05BAE_pcr_1	0.896211	1.07168	1.01784	0.868253	0.963495	0.0970474	4	19.8562	0.000279147
SiJWD09BCT_pcr_1	-2.63533	-2.8629	-2.27554	-2.06821	-2.46049	0.35618	4	13.816	0.000820713		SiJWD05AAY_pcr_2	1.06876	0.912516	0.875883	0.999677	0.964209	0.0869143	4	22.1876	0.000200435
SiJWF08BBA_pcr_1	-2.27174	-2.36378	-2.51273	-2.63945	-2.44693	0.162273	4	30.1581	8.00833e-05		SiJWH04BDX_pcr_1	1.01947	0.807922	1.14371	0.893348	0.966114	0.146866	4	13.1565	0.000948626
SiJWC03AAH_pcr_2	-2.12917	-2.21475	-2.6931	-2.74442	-2.44536	0.318313	4	15.3645	0.000598872		SiJWH10BAG_pcr_2	0.950794	1.12336	0.963174	0.846176	0.970877	0.114405	4	16.9726	0.000445473
SiJWE09BDC_pcr_1	-2.59164	-2.55084	-2.46783	-2.15983	-2.44254	0.195382	4	25.0027	0.000140286		SiJWC09BBE_pcr_1	1.02183	1.04859	1.02051	0.795176	0.971525	0.118276	4	16.4281	0.000490843
SiJWC10BAN_pcr_1	-2.61656	-2.83672	-2.24083	-2.046	-2.43503	0.357474	4	13.6235	0.000855546		SiJWH01BBO_pcr_1	0.818288	0.934959	0.99989	1.14731	0.975112	0.137201	4	14.2143	0.000754411
SiJWD11CAO_pcr_1	-2.33003	-2.28104	-2.70532	-2.37396	-2.42259	0.192269	4	25.2	0.000137028		SiJWG09AAG_pcr_2	1.08097	1.0099	0.845774	0.983437	0.98002	0.0985179	4	19.8953	0.000277515
SiJWB12ACM_pcr_2	-2.25754	-2.26137	-2.58502	-2.57413	-2.41951	0.18488	4	26.1738	0.000122347		SiJWD12BDV_pcr_1	0.8667	0.912485	0.998842	1.14242	0.980113	0.121286	4	16.162	0.000515271
SiJWF08AAO_pcr_2	-2.0891	-2.13447	-2.75825	-2.67935	-2.41529	0.352421	4	13.7069	0.000840224		SiJWC05AAJ_pcr_2	1.14714	0.889979	0.867271	1.03273	0.984281	0.130965	4	15.0313	0.000639157
SiJWF07AAL_pcr_2	-2.39656	-2.29967	-2.7141	-2.25068	-2.41525	0.20825	4	23.1957	0.00017553		SiJWD01BAK_pcr_2	1.01979	0.985746	0.976039	0.969921	0.987874	0.0222534	4	88.7842	3.14967e-06
SiJWB05CAI_pcr_1	-2.2968	-2.441	-2.4281	-2.47881	-2.41118	0.0792305	4	60.8649	9.77121e-06		SiJWD09ABP_pcr_2	0.885053	0.992993	1.08402	0.995555	0.989407	0.0814308	4	24.3006	0.00015275
SiJWA08BDT_pcr_1	-2.45226	-2.41366	-2.54141	-2.20781	-2.40379	0.141179	4	34.0532	5.56739e-05		SiJWC04ADH_pcr_1	0.979492	0.961795	0.997648	1.02025	0.989795	0.025027	4	79.0984	4.45368e-06
SiJWB08BCG_pcr_1	-2.31267	-2.92229	-2.14528	-2.23344	-2.40342	0.352604	4	13.6324	0.000853897		SiJWE04ACA_pcr_2	0.879972	0.924084	1.09407	1.06369	0.990454	0.10442	4	18.9705	0.000319819
SiJWF08AAX_pcr_2	-2.18631	-1.98724	-2.76415	-2.65249	-2.39755	0.37075	4	12.9335	0.000997828		SiJWA03ADM_pcr_1	1.08557	0.994975	1.0521	0.832178	0.991206	0.112423	4	17.6335	0.000397604
SiJWC05ABT_pcr_2	-2.38951	-2.08621	-2.64461	-2.45995	-2.39507	0.232311	4	20.6195	0.000249441		SiJWA12ACW_pcr_2	0.860397	0.900241	1.12015	1.09464	0.993856	0.132516	4	14.9998	0.000643149
SiJWC02BBM_pcr_1	-2.09916	-2.36575	-2.46373	-2.61699	-2.38641	0.217626	4	21.9313	0.000207508		SiJWH02BEA_pcr_1	0.827949	0.994797	1.05952	1.10264	0.996224	0.12062	4	16.5183	0.000482916
SiJWB07BDB_pcr_1	-2.2172	-2.37087	-2.4505	-2.46886	-2.37686	0.114622	4	41.4729	3.08511e-05		SiJWD02BAE_pcr_1	1.15834	1.05107	0.958875	0.818588	0.996717	0.144034	4	13.84	0.000816499
SiJWH06CAK_pcr_1	-2.53017	-2.21062	-2.519	-2.22794	-2.37193	0.176468	4	26.8823	0.000112957		SiJWC07ABI_pcr_2	0.93616	0.927021	1.07811	1.04954	0.997709	0.0773233	4	25.8062	0.000127631
SiJWF04BEA_pcr_1	-2.20026	-2.34391	-2.40843	-2.50883	-2.36536	0.129304	4	36.5861	4.49114e-05		SiJWF07ACY_pcr_1	0.834718	0.931496	1.1443	1.08172	0.998059	0.140828	4	14.1742	0.000760766
SiJWD06ACT_pcr_2	-2.03175	-2.277	-2.48838	-2.65613	-2.36331	0.27004	4	17.5035	0.000406462		SiJWA06ABP_pcr_2	0.920161	1.01589	1.11406	0.946733	0.99921	0.0865453	4	23.091	0.000177917
SiJWH06AAK_pcr_2	-1.97474	-2.32752	-2.39193	-2.74189	-2.35902	0.31429	4	15.0117	0.000641627		SiJWH06CAB_pcr_1	1.1906	0.857241	1.02339	0.929732	1.00024	0.143981	4	13.8941	0.00080713
SiJWF06CAS_pcr_1	-2.26968	-2.2947	-2.40928	-2.44856	-2.35556	0.0868223	4	54.2616	1.37868e-05		SiJWE09BAW_pcr_1	1.00706	1.00573	1.08075	0.914143	1.00192	0.0682157	4	29.3751	8.66411e-05
SiJWC09ABO_pcr_2	-2.57159	-1.9796	-2.51422	-2.34398	-2.35235	0.266634	4	17.6447	0.00039685		SiJWC05ABG_pcr_2	0.929773	1.09058	1.02	0.974697	1.00376	0.0686061	4	29.2616	8.76504e-05
SiJWH02BBO_pcr_1	-2.22524	-2.63276	-2.19891	-2.34472	-2.35041	0.19864	4	23.665	0.000165336		SiJWH08ACB_pcr_2	1.20679	0.930597	0.919255	0.961759	1.0046	0.135985	4	14.7751	0.000672608
SiJWE07BAD_pcr_1	-2.58771	-2.6989	-1.98835	-2.12505	-2.35	0.346234	4	13.5746	0.000864703		SiJWA11BAA_pcr_2	1.12507	0.940334	1.07308	0.8842	1.00567	0.112286	4	17.9126	0.000379439
SiJWC11BDO_pcr_1	-1.9483	-2.16865	-2.51652	-2.76192	-2.34885	0.361318	4	13.0016	0.000982455		SiJWA05AAF_pcr_2	0.919844	0.887184	1.17886	1.0396	1.00637	0.132347	4	15.208	0.000617354
SiJWB04AAU_pcr_2	-1.96421	-2.23113	-2.65238	-2.52757	-2.34382	0.30864	4	15.1881	0.000619763		SiJWE02BAY_pcr_1	0.97851	0.954884	1.12424	0.980303	1.00949	0.0773778	4	26.0924	0.000123492
SiJWF06AAL_pcr_2	-2.526	-2.5522	-2.00035	-2.22387	-2.3256	0.263088	4	17.6793	0.000394544		SiJWF09AAG_pcr_2	0.960048	1.1535	0.90841	1.02403	1.0115	0.105822	4	19.1169	0.000312574
SiJWH04BCV_pcr_1	-2.04633	-2.3115	-2.10549	-2.83134	-2.32367	0.357022	4	13.017	0.00097902		SiJWA01BBB_pcr_1	0.871347	0.997405	1.06939	1.11586	1.0135	0.106564	4	19.0214	0.000317278
SiJWG08CAG_pcr_1	-2.14467	-2.11356	-2.64587	-2.3829	-2.32175	0.247315	4	18.7757	0.000329813		SiJWB08ADO_pcr_1	1.089	1.00209	0.892932	1.07474	1.01469	0.0896495	4	22.6368	0.000188792
SiJWD08ACK_pcr_2	-2.26576	-2.57997	-2.11661	-2.31998	-2.32058	0.193124	4	24.032	0.000157906		SiJWD11BDK_pcr_1	1.00499	1.00831	1.11694	0.930558	1.0152	0.076741	4	26.4578	0.000118462
SiJWC08ACZ_pcr_1	-1.98566	-2.08004	-2.64265	-2.54561	-2.31349	0.328734	4	14.0751	0.000776742		SiJWG05ADH_pcr_1	0.952309	0.98905	1.00148	1.12073	1.01589	0.072943	4	27.8544	0.000101573
SiJWC12BCQ_pcr_1	-2.27646	-2.32907	-2.42039	-2.22102	-2.31173	0.0848138	4	54.5131	1.35969e-05		SiJWB03BCJ_pcr_1	1.00262	0.964208	1.09215	1.02039	1.01984	0.0536056	4	38.0498	3.99332e-05
SiJWD04BBU_pcr_1	-2.4605	-2.56794	-2.10467	-2.09358	-2.30667	0.24368	4	18.932	0.000321764		SiJWH08ACA_pcr_2	1.08997	1.1917	0.970075	0.841053	1.0232	0.151491	4	13.5084	0.000877327
SiJWF04BCK_pcr_1	-2.43445	-2.63384	-1.97803	-2.16757	-2.30347	0.28907	4	15.9371	0.000537179		SiJWG08AAB_pcr_2	1.00923	0.907352	1.09872	1.07928	1.02364	0.0865321	4	23.6593	0.000165455
SiJWH11BAT_pcr_1	-2.43543	-2.65559	-1.96881	-2.14042	-2.30006	0.305471	4	15.0591	0.000635653		SiJWA09ACS_pcr_2	0.990298	1.21678	1.0147	0.876879	1.02466	0.141454	4	14.4876	0.000712989
SiJWC11BCJ_pcr_1	-2.14955	-2.1472	-2.40534	-2.48691	-2.29725	0.175101	4	26.2391	0.000121438		SiJWE05ACW_pcr_2	1.03689	1.06158	1.011	1.00409	1.02839	0.0262454	4	78.3673	4.57944e-06
SiJWA05ACJ_pcr_2	-2.15462	-2.13362	-2.47517	-2.42244	-2.29646	0.177429	4	25.8859	0.000126459		SiJWC03BCH_pcr_1	1.01895	1.03774	1.13702	0.92216	1.02897	0.0880554	4	23.371	0.000171627
SiJWC12ABL_pcr_2	-2.06643	-2.26679	-2.67818	-2.14796	-2.28984	0.27165	4	16.8588	0.000454486		SiJWB05AAV_pcr_2	1.07779	0.924426	1.04123	1.07869	1.03054	0.072861	4	28.2877	9.69898e-05
SiJWG11BDT_pcr_1	-2.43744	-2.04461	-2.37883	-2.29389	-2.28869	0.173065	4	26.449	0.000118581		SiJWD08ACH_pcr_2	1.11503	1.15125	0.959098	0.938296	1.04092	0.107846	4	19.3038	0.000303643
SiJWE11ACH_pcr_2	-2.36674	-2.37874	-2.09993	-2.28291	-2.28208	0.128697	4	35.4645	4.93001e-05		SiJWA09BCR_pcr_1	1.0435	1.07604	0.985205	1.06223	1.04174	0.0399812	4	52.1116	1.55629e-05
SiJWH05ACH_pcr_2	-2.2498	-2.37096	-2.15783	-2.33189	-2.27762	0.0944833	4	48.2122	1.96485e-05		SiJWD03BDX_pcr_1	1.0371	1.17535	1.012	0.94514	1.0424	0.0967583	4	21.5464	0.000218771
SiJWF08BDO_pcr_1	-2.29013	-2.58409	-2.09259	-2.13072	-2.27438	0.2235	4	20.3524	0.000259336		SiJWD02AEA_pcr_1	1.12745	0.950124	1.06783	1.02692	1.04308	0.0744609	4	28.0169	9.98213e-05
SiJWB11BBC_pcr_1	-2.56482	-2.45916	-2.02883	-2.02711	-2.26998	0.282759	4	16.056	0.000525447		SiJWD11AAQ_pcr_2	1.08434	1.07902	0.971024	1.05393	1.04708	0.0524091	4	39.9579	3.44894e-05
SiJWH03BAB_pcr_1	-2.50551	-2.3328	-1.97093	-2.25635	-2.2664	0.222851	4	20.34	0.000259807		SiJWB12ACJ_pcr_2	1.08796	1.14195	0.990706	0.968682	1.04733	0.0816419	4	25.6566	0.000129869
SiJWD02AAU_pcr_2	-2.20597	-2.20858	-2.35303	-2.29786	-2.26636	0.0718547	4	63.0817	8.77742e-06		SiJWA09ADD_pcr_1	0.93118	1.14667	1.03147	1.08927	1.04965	0.0919225	4	22.8377	0.000183876
SiJWA10ABJ_pcr_2	-1.96486	-2.07865	-2.48374	-2.51945	-2.26168	0.281283	4	16.0812	0.000523004		SiJWD09BDC_pcr_1	1.12295	1.00194	1.04895	1.04705	1.05522	0.0501055	4	42.12	2.94526e-05
SiJWA02ABI_pcr_2	-2.37216	-1.96048	-2.26361	-2.45045	-2.26167	0.214913	4	21.0474	0.000234617		SiJWF09BAQ_pcr_1	0.901354	1.03836	1.1551	1.15367	1.06212	0.120328	4	17.6538	0.000396244
SiJWD06BCU_pcr_1	-2.32348	-2.60387	-2.11304	-1.99741	-2.25945	0.266348	4	16.9661	0.000445982		SiJWF10BCE_pcr_1	0.977798	1.05316	1.16117	1.05759	1.06243	0.0753233	4	28.2099	9.77929e-05
SiJWA06ADN_pcr_1	-2.55743	-2.40558	-1.82822	-2.24527	-2.25912	0.314275	4	14.3767	0.000729421		SiJWC12BDD_pcr_1	1.25102	0.98993	1.02502	0.983981	1.06249	0.126986	4	16.7339	0.000464648
SiJWC05ACS_pcr_1	-2.12135	-2.42462	-2.26658	-2.20541	-2.25449	0.128096	4	35.2002	5.0417e-05		SiJWA05AAY_pcr_2	0.953867	1.04678	1.11548	1.13462	1.06269	0.081765	4	25.9937	0.000124899
SiJWF12BCQ_pcr_1	-2.28712	-2.52188	-2.04235	-2.15496	-2.25158	0.206107	4	21.8486	0.000209862		SiJWF04BDX_pcr_1	0.936245	1.2509	0.92649	1.14701	1.06516	0.160255	4	13.2933	0.00092002
SiJWB08BCH_pcr_1	-2.13733	-2.713	-2.09459	-2.06068	-2.2514	0.309327	4	14.5567	0.00070299		SiJWE08BCE_pcr_1	1.12065	1.14922	1.00126	0.99081	1.06549	0.0811503	4	26.2596	0.000121156
SiJWG04BBB_pcr_1	-2.29665	-2.57984	-2.20643	-1.89557	-2.24462	0.281882	4	15.926	0.000538299		SiJWG10ACC_pcr_2	1.09346	0.999271	1.22395	0.952802	1.06737	0.119666	4	17.8391	0.000384115
SiJWG08CAG_pcr_1	-2.0661	-2.02382	-2.39899	-2.46323	-2.23804	0.225143	4	19.881	0.000278109		SiJWD06AAY_pcr_1	0.879589	1.14616	1.12949	1.12436	1.0699	0.127214	4	16.8205	0.000457569
SiJWA08CAU_pcr_1	-2.03596	-2.04383	-2.44913	-2.41933	-2.23706	0.228016	4	19.622	0.000289199		SiJWE07BBH_pcr_1	0.882933	1.14214	1.10168	1.15574	1.07062	0.127216	4	16.8316	0.000456673
SiJWH05ACS_pcr_1	-2.3785	-2.53655	-1.80979	-2.22298	-2.23696	0.312228	4	14.329	0.000736649		SiJWG11BCO_pcr_1	1.09077	1.00844	1.25496	0.936255	1.07261	0.136984	4	15.6604	0.000565883
SiJWD09ACT_pcr_2	-2.06497	-2.62857	-1.9981	-2.25567	-2.23683	0.283043	4	15.8056	0.000550577		SiJWG09CAI_pcr_1	1.04602	0.97655	1.16943	1.10741	1.07485	0.0826624	4	26.0058	0.000124724
SiJWE08BBN_pcr_1	-2.29644	-2.64806	-1.98854	-1.97896	-2.228	0.316492	4	14.0794	0.000776053		SiJWG08ADT_pcr_1	1.23867	1.18822	0.925414	0.948661	1.07524	0.161187	4	13.3416	0.000910198
SiJWG09BDN_pcr_1	-2.05468	-1.9954	-2.33598	-2.48717	-2.21831	0.232806	4	19.0572	0.000315506		SiJWA12ACL_pcr_2	1.03001	1.14108	1.0783	1.06514	1.07863	0.0463523	4	46.5406	2.184e-05
SiJWD09AAU_pcr_2	-1.9361	-2.25665	-2.05891	-2.55711	-2.20219	0.270967	4	16.2543	0.000506616		SiJWA01BAR_pcr_1	1.02434	1.02305	1.14616	1.12107	1.07866	0.0642871	4	33.5575	5.81723e-05
SiJWE08CAN_pcr_1	-1.89357	-2.49603	-1.98089	-2.43226	-2.20069	0.307398	4	14.3181	0.000738307		SiJWF06BAU_pcr_1	0.965624	0.967804	1.25549	1.13311	1.08051	0.140579	4	15.3722	0.000597975
SiJWH07BDV_pcr_1	-2.11748	-2.3744	-2.12899	-2.17606	-2.19923	0.119494	4	36.809	4.41016e-05		SiJWE02BDW_pcr_2	0.979197	1.23244	1.08615	1.05761	1.08885	0.10587	4	20.5695	0.000251257
SiJWH08ABX_pcr_2	-1.93678	-2.03124	-2.4245	-2.38465	-2.19429	0.246395	4	17.8112	0.000385909		SiJWF07BAQ_pcr_1	1.09065	1.03608	1.07386	1.15848	1.08977	0.0511747	4	42.5901	2.84893e-05
SiJWB02AAY_pcr_2	-2.27571	-2.41113	-2.09075	-1.99238	-2.19249	0.187195	4	23.4246	0.000170455		SiJWD09ABH_pcr_2	1.14105	1.2076	1.04514	0.973261	1.09176	0.103385	4	21.1204	0.000232203
SiJWB12BCH_pcr_1	-2.18151	-2.29858	-2.12341	-2.09885	-2.17559	0.0890189	4	48.8793	1.88557e-05		SiJWD11BAE_pcr_1	0.920704	1.08013	1.232	1.14116	1.0935	0.13101	4	16.6934	0.000468009
SiJWE07AAA_pcr_2	-2.38556	-2.4505	-1.76371	-2.09964	-2.17485	0.313623	4	13.8692	0.000811418		SiJWH08ADY_pcr_1	1.15531	1.27417	0.934209	1.01182	1.09388	0.151111	4	14.4778	0.000714426
SiJWH11ABJ_pcr_2	-2.36113	-2.09687	-2.17334	-2.04105	-2.1681	0.139645	4	31.0515	7.33841e-05		SiJWB02AAR_pcr_2	1.16398	1.02838	1.06078	1.12923	1.09559	0.0620162	4	35.3325	4.98537e-05
SiJWH12BBN_pcr_1	-2.38433	-2.13342	-1.97066	-2.15613	-2.16114	0.17019	4	25.3968	0.00013388		SiJWC04BAP_pcr_1	1.00383	1.05242	1.20274	1.12598	1.09624	0.0869601	4	25.2126	0.000136825
SiJWC12ACY_pcr_1	-2.05944	-1.95956	-2.28458	-2.22949	-2.13327	0.150309	4	28.385	9.59986e-05		SiJWH02ABJ_pcr_2	0.999884	0.966589	1.12894	1.29766	1.09827	0.150241	4	14.6201	0.000693995
SiJWB10ACY_pcr_1	-1.98123	-2.08292	-2.33648	-2.12802	-2.13216	0.149409	4	28.5413	9.44348e-05		SiJWF01BDX_pcr_1	0.972927	1.29333	1.0641	1.065	1.09884	0.136666	4	16.0807	0.000523053
SiJWG01CAD_pcr_1	-1.7329	-2.18013	-2.2836	-2.32709	-2.13093	0.272417	4	15.6446	0.000567578		SiJWC03ACX_pcr_1	1.17777	1.08764	1.05858	1.07227	1.09906	0.0537934	4	40.8624	3.22526e-05
SiJWA08CAG_pcr_1	-2.17512	-2.48478	-1.86435	-1.98696	-2.1278	0.270131	4	15.7538	0.000555965		SiJWD05AAY_pcr_1	1.22185	1.13673	1.00289	1.07142	1.10823	0.0934031	4	23.73	0.000163987
SiJWF05BDB_pcr_1	-2.2488	-2.29435	-2.10572	-1.8542	-2.12577	0.198083	4	21.4634	0.000221305		SiJWE12BAP_pcr_1	1.15168	1.05878	1.18025	1.04272	1.10836	0.0678541	4	32.6689	6.30385e-05
SiJWD02AAY_pcr_1	-1.93338	-2.0575	-2.20869	-2.25618	-2.11393	0.147193	4	28.7232	9.26572e-05		SiJWE11ADE_pcr_1	1.11541	1.19019	1.12377	1.02133	1.11268	0.0694844	4	32.0266	6.68982e-05
SiJWF12BCO_pcr_1	-1.97031	-1.99672	-2.08887	-2.38326	-2.10979	0.189264	4	22.2947	0.000197574		SiJWD07BAC_pcr_1	1.13889	0.948985	1.27785	1.08723	1.11324	0.135906	4	16.3825	0.000494918
SiJWD01BAU_pcr_1	-2.38175	-1.98207	-2.00906	-2.04828	-2.10529	0.1863	4	22.6011	0.000189684		SiJWH06AAQ_pcr_2	1.16551	1.12751	1.08951	1.07515	1.11442	0.0405986	4	54.8994	1.33122e-05
SiJWD12ACO_pcr_2	-1.94038	-1.81617	-2.15442	-2.50279	-2.10344	0.300663	4	13.992	0.000790495		SiJWD07ABX_pcr_2	1.33692	1.09529	0.979199	1.04682	1.11456	0.155698	4	14.3168	0.000738505
SiJWB04ABI_pcr_2	-2.18476	-2.14283	-2.08402	-1.97543	-2.09676	0.0908291	4	46.1693	2.23706e-05		SiJWG06ABQ_pcr_2	1.03093	1.02558	1.20785	1.20128	1.11641	0.101852	4	21.9221	0.000207769
SiJWH03ADU_pcr_1	-2.19687	-2.18327	-2.05622	-1.94718	-2.09588	0.117645	4	35.6305	4.86153e-05		SiJWC04AAX_pcr_2	0.887437	1.09658	1.24649	1.24051	1.11775	0.168461	4	13.2702	0.000924762
SiJWA03BAK_pcr_2	-1.98607	-1.97303	-2.30147	-2.10491	-2.09137	0.152117	4	27.497	0.000105573		SiJWC04BAQ_pcr_1	0.968399	1.21272	1.23709	1.05786	1.11902	0.127992	4	17.4858	0.000407688
SiJWA12BDK_pcr_1	-2.17175	-2.4143	-1.68972	-2.08371	-2.08987	0.301174	4	13.8781	0.000809877		SiJWH01BBB_pcr_1	1.00178	1.04247	1.26663	1.16834	1.1198	0.120865	4	18.5298	0.000343024
SiJWH05BBD_pcr_1	-2.14117	-2.18055	-2.31515	-1.69297	-2.08246	0.270131	4	15.4181	0.000592703		SiJWG02BAW_pcr_1	1.15982	1.1171	1.05641	1.14697	1.12008	0.0460648	4	48.6304	1.91464e-05
SiJWH03BDJ_pcr_1	-1.9636	-1.70166	-2.28361	-2.37963	-2.08212	0.309789	4	13.4422	0.000890168		SiJWE09ABF_pcr_2	1.20057	1.2211	1.15565	0.933893	1.1278	0.132131	4	17.071	0.000437882
SiJWG11BDV_pcr_1	-2.02773	-2.1827	-1.94257	-2.13733	-2.07258	0.108371	4	38.2498	3.93111e-05		SiJWA05ACV_pcr_2	1.20399	0.911645	1.14322	1.2525	1.12784	0.150903	4	14.9478	0.000649806
SiJWA11BCU_pcr_1	-2.06916	-1.99549	-2.10677	-2.10471	-2.06903	0.051977	4	79.6134	4.36784e-06		SiJWD10BCS_pcr_1	1.13836	1.27153	1.13242	0.981696	1.131	0.118457	4	19.0956	0.000313618
SiJWH07ADL_pcr_1	-1.8377	-1.90202	-2.3012	-2.23204	-2.06824	0.232291	4	17.8073	0.000386158		SiJWE01ACP_pcr_2	1.11661	1.1606	1.13009	1.1208	1.13202	0.0198623	4	113.987	1.4886e-06
SiJWE07BAM_pcr_1	-2.37961	-2.04263	-1.95436	-1.85605	-2.05816	0.227447	4	18.098	0.000367982		SiJWH11AAV_pcr_2	0.974056	1.26907	1.08272	1.20673	1.13314	0.13133	4	17.2564	0.00042403
SiJWF03ADB_pcr_1	-1.84342	-1.75665	-2.39702	-2.212	-2.05227	0.30297	4	13.5477	0.000869804		SiJWH10ABH_pcr_2	0.968211	1.09463	1.10448	1.36663	1.13349	0.167356	4	13.5459	0.000870151
SiJWC06ACE_pcr_2	-1.77183	-1.87684	-2.43029	-2.12143	-2.0501	0.292738	4	14.0064	0.000788103		SiJWD11CAG_pcr_1	0.943361	1.1431	1.32654	1.12187	1.13372	0.156679	4	14.4719	0.000715289
SiJWB05BBK_pcr_1	-2.14777	-2.0213	-2.24932	-1.75416	-2.04314	0.214042	4	19.091	0.000313842		SiJWB03BCM_pcr_1	1.18689	1.18688	1.09011	1.07646	1.13509	0.060071	4	37.7915	4.07563e-05
SiJWB12BDJ_pcr_1	-2.2521	-2.31024	-1.8504	-1.7546	-2.04183	0.280121	4	14.5782	0.000699922		SiJWG09BAL_pcr_1	1.11822	1.06123	1.31457	1.07338	1.14185	0.117728	4	19.3982	0.000299261
SiJWE05BCF_pcr_1	-1.94155	-1.6863	-2.23614	-2.30274	-2.04168	0.284188	4	14.3685	0.000730655		SiJWD04BCK_pcr_1	1.12648	1.05839	1.12224	1.27776	1.14622	0.0930602	4	24.6339	0.000146657
SiJWC06ADR_pcr_1	-2.12809	-2.1362	-1.95009	-1.94489	-2.03982	0.106682	4	38.241	3.93382e-05		SiJWG03ACT_pcr_2	1.01973	1.02799	1.27966	1.27616	1.15088	0.146724	4	15.6877	0.000562953
SiJWD11ADU_pcr_1	-1.69836	-1.96062	-2.29647	-2.17679	-2.03306	0.262877	4	15.4677	0.000587075		SiJWB08BBF_pcr_1	1.02023	1.11901	1.11882	1.35063	1.15217	0.140249	4	16.4304	0.000490642
SiJWC10BCT_pcr_1	-2.01555	-2.36149	-1.86515	-1.87923	-2.03035	0.23094	4	17.5834	0.000400985		SiJWA07ADY_pcr_newprimers	0.92025	1.18834	1.28339	1.22211	1.15352	0.160414	4	14.3818	0.000728652
SiJWB07BBE_pcr_1	-1.61387	-2.24818	-2.0531	-2.17614	-2.02282	0.284285	4	14.2309	0.000751805		SiJWC05CAP_pcr_1	1.17558	0.944099	1.31059	1.18986	1.15503	0.153109	4	15.0877	0.000632083
SiJWF02ADK_pcr_1	-1.7101	-1.8432	-2.40514	-2.10941	-2.01696	0.307452	4	13.1205	0.000956342		SiJWF06BDQ_pcr_1	0.96758	1.23072	1.25758	1.16524	1.15528	0.131005	4	17.6372	0.000397357
SiJWE10ABH_pcr_2	-1.81429	-2.00032	-2.13058	-2.11898	-2.01604	0.146818	4	27.4631	0.000105963		SiJWC12ABU_pcr_2	1.24982	1.17065	1.09253	1.1119	1.15622	0.070685	4	32.7148	6.27738e-05
SiJWB12ADV_pcr_1	-1.78222	-1.87581	-2.10297	-2.30271	-2.01593	0.233861	4	17.2404	0.000425201		SiJWG11AAH_pcr_2	1.1915	0.997018	1.30613	1.13423	1.15722	0.128506	4	18.0103	0.000373342
SiJWB02ABW_pcr_2	-2.12458	-1.94915	-1.85315	-2.1227	-2.01239	0.134304	4	29.9677	8.16151e-05		SiJWE06CAM_pcr_1	1.19357	1.3932	1.0879	0.975015	1.16242	0.177858	4	13.0713	0.000967028
SiJWH10BCP_pcr_1	-2.04111	-1.96814	-2.06868	-1.96984	-2.01194	0.0508617	4	79.1142	4.45101e-06		SiJWF08ABK_pcr_2	1.1563	1.10176	1.20412	1.19432	1.16413	0.0464133	4	50.1635	1.74456e-05
SiJWC04ACL_pcr_2	-1.75482	-1.98206	-2.09681	-2.19353	-2.0068	0.188923	4	21.2447	0.000228174		SiJWH09AAR_pcr_2	0.999738	1.17697	1.23739	1.24259	1.16417	0.113596	4	20.4967	0.000253928
SiJWB03ACE_pcr_2	-1.89991	-2.0227	-2.29443	-1.7914	-2.00211	0.216577	4	18.4887	0.000345303		SiJWF05ACD_pcr_2	1.25119	1.16564	1.12756	1.12006	1.16611	0.060126	4	38.7889	3.76972e-05
SiJWA02CAE_pcr_1	-1.9542	-1.92401	-2.13867	-1.97701	-1.99847	0.0959553	4	41.6543	3.04503e-05		SiJWF02ADH_pcr_1	1.10486	1.3329	1.04595	1.19023	1.16849	0.124588	4	18.7575	0.000330764
SiJWG04AAD_pcr_2	-2.09157	-2.33629	-1.81718	-1.71135	-1.9891	0.28151	4	14.1317	0.000767568		SiJWF06ACP_pcr_2	1.25424	1.21978	0.921831	1.28078	1.16916	0.166764	4	14.0217	0.000785552
SiJWG05BDY_pcr_1	-2.18054	-2.02583	-1.7249	-2.01661	-1.98697	0.19021	4	20.8924	0.000239847		SiJWF11ACD_pcr_2	1.33666	1.28248	1.07262	0.989581	1.17034	0.165795	4	14.1179	0.000769786
SiJWF06ABY_pcr_2	-2.08411	-2.01495	-1.86113	-1.98325	-1.98586	0.0932083	4	42.6112	2.84471e-05		SiJWE01ACG_pcr_2	1.01204	1.08183	1.36618	1.23118	1.17281	0.158031	4	14.8427	0.000663557
SiJWA10AAZ_pcr_1	-1.59122	-1.97362	-2.11664	-2.24906	-1.98263	0.28415	4	13.9548	0.000796755		SiJWC04AAX_pcr_1	0.984383	1.07517	1.28871	1.34801	1.17407	0.172394	4	13.6207	0.00085606
SiJWE11ABG_pcr_2	-1.9058	-1.89475	-2.02098	-2.10398	-1.98138	0.099692	4	39.75	3.50324e-05		SiJWD10BCX_pcr_1	1.14816	1.05502	1.25909	1.2375	1.17494	0.093262	4	25.1966	0.000137084
SiJWB06ABW_pcr_2	-1.88082	-1.91949	-1.76511	-2.34885	-1.97857	0.255417	4	15.4928	0.000584257		SiJWF07AAS_pcr_2	1.38706	1.02447	1.1274	1.16799	1.17673	0.152679	4	15.4144	0.000593126
SiJWB05AAA_pcr_2	-1.62108	-2.29998	-1.85822	-2.09862	-1.96947	0.294204	4	13.3885	0.000900787		SiJWD07ABU_pcr_2	0.952991	1.2502	1.30838	1.20004	1.1779	0.156341	4	15.0684	0.000634492
SiJWD02AAY_pcr_2	-1.79033	-1.83168	-2.01464	-2.18629	-1.95573	0.182001	4	21.4914	0.000220446		SiJWC12ACQ_pcr_2	1.13952	1.25672	1.03461	1.28509	1.17898	0.115042	4	20.4965	0.000253934
SiJWF06BBI_pcr_1	-1.84396	-2.02037	-2.10364	-1.84764	-1.9539	0.129383	4	30.2034	7.97244e-05		SiJWH01ABD_pcr_2	1.0127	1.42179	1.21516	1.0841	1.18344	0.179667	4	13.1737	0.00094496
SiJWD01BBO_pcr_1	-1.71975	-1.86203	-2.10074	-2.12407	-1.95165	0.194733	4	20.0444	0.000271404		SiJWA01CAX_pcr_1	1.21755	1.22012	1.2667	1.03176	1.18403	0.104	4	22.7698	0.000185518
SiJWC08ADU_pcr_1	-1.77949	-1.85426	-2.2286	-1.9423	-1.95116	0.196562	4	19.8529	0.000279284		SiJWG06CAL_pcr_1	1.16188	1.14812	1.24895	1.18333	1.18557	0.0446681	4	53.0835	1.47244e-05
SiJWH04BBP_pcr_1	-1.81784	-1.67696	-2.24626	-2.06113	-1.95055	0.25307	4	15.4151	0.000593052		SiJWC07AAY_pcr_1	1.29896	1.2343	1.15213	1.06042	1.18646	0.103295	4	22.9723	0.000180678
SiJWH03ADM_pcr_1	-1.86165	-2.28856	-1.71021	-1.94142	-1.95046	0.24495	4	15.9254	0.000538359		SiJWC05ABU_pcr_2	1.3786	1.1541	1.18152	1.08528	1.19988	0.125839	4	19.07	0.000314873
SiJWF04BCD_pcr_1	-1.96647	-2.00753	-2.00551	-1.81452	-1.94851	0.0913037	4	42.6819	2.83063e-05		SiJWE02CAF_pcr_1	1.32032	1.29537	1.13753	1.04971	1.20073	0.129176	4	18.5907	0.000339686
SiJWE12CAT_pcr_1	-2.08733	-2.06925	-2.00416	-1.61962	-1.94509	0.219901	4	17.6906	0.000393793		SiJWA02ADR_pcr_1	1.07574	1.25601	1.35583	1.13566	1.20581	0.124986	4	19.2951	0.000304053
SiJWF03BAA_pcr_2	-1.71277	-1.98681	-1.99043	-2.08037	-1.94259	0.159212	4	24.4026	0.000150849		SiJWD03BDC_pcr_1	0.985804	1.244	1.29935	1.29522	1.20609	0.149001	4	16.189	0.000512716
SiJWE03BBP_pcr_1	-1.82671	-1.89107	-2.10986	-1.92527	-1.93823	0.1215	4	31.9051	6.76639e-05		SiJWH10ADZ_pcr_1	1.00355	1.29945	1.18692	1.33776	1.20692	0.149932	4	16.0996	0.000521228
SiJWG01MAA_pcr_1	-1.86653	-1.96771	-1.92956	-1.98627	-1.93752	0.0528883	4	73.2683	5.60315e-06		SiJWA06BCR_pcr_1	1.15988	1.2984	1.18363	1.20558	1.21187	0.0606279	4	39.9774	3.44389e-05
SiJWE10AA1_pcr_1	-1.98083	-1.87245	-1.94799	-1.91113	-1.9281	0.0467657	4	82.4577	3.9314e-06		SiJWH07BDG_pcr_1	1.24192	1.08346	1.22746	1.32485	1.21942	0.100284	4	24.3195	0.000152395
SiJWE03AAQ_pcr_2	-1.95606	-1.70279	-2.10892	-1.93037	-1.92454	0.167527	4	22.9758	0.000180595		SiJWH08ADD_pcr_1	1.23928	1.32243	1.19424	1.13789	1.22346	0.0779324	4	31.398	7.09873e-05
SiJWH05ACA_pcr_2	-1.9059	-1.8672	-2.10112	-1.82015	-1.92359	0.123439	4	31.1667	7.25756e-05		SiJWD08BAD_pcr_1	1.168	1.17098	1.21481	1.35704	1.22771	0.0888373	4	27.6395	0.000103954
SiJWF12BDX_pcr_1	-2.11194	-1.84261	-1.76141	-1.9688	-1.92119	0.153143	4	25.0901	0.000138831		SiJWB05BAP_pcr_1	1.08653	1.22236	1.21186	1.40565	1.2316	0.131421	4	18.7428	0.000331541
SiJWB06BBY_pcr_1	-1.73595	-1.79676	-2.04034	-2.09735	-1.9176	0.177926	4	21.5551	0.000218508		SiJWG11ADC_pcr_1	1.21956	1.38558	1.1053	1.21616	1.23165	0.115533	4	21.3212	0.000225739
SiJWH04BAW_pcr_1	-1.82647	-1.96686	-1.82099	-2.04442	-1.91469	0.109717	4	34.9022	5.17168e-05		SiJWF08CAP_pcr_1	1.35933	1.32483	1.28045	0.963508	1.23203	0.181902	4	13.5461	0.000870108
SiJWH06BAS_pcr_1	-2.24654	-1.89547	-1.85138	-1.66304	-1.91411	0.243469	4	15.7237	0.000559141		SiJWF08AAV_pcr_2	1.03474	1.11139	1.42276	1.36279	1.23292	0.18881	4	13.0599	0.000969537
SiJWD01ADX_pcr_1	-1.67993	-1.71331	-2.15426	-2.08992	-1.90936	0.247421	4	15.4341	0.000590887		SiJWG05AAZ_pcr_2	1.19949	1.2363	1.31355	1.18484	1.23354	0.0575617	4	42.8599	2.79555e-05
SiJWE04ADC_pcr_1	-1.90818	-1.73246	-1.88113	-2.08499	-1.90169	0.144572	4	26.3079	0.000120492		SiJWF11ABI_pcr_2	1.39885	1.24547	1.06284	1.22936	1.23413	0.137386	4	17.9658	0.000376102
SiJWH04BCZ_pcr_1	-1.95801	-2.0134	-1.6751	-1.95772	-1.90106	0.152896	4	24.8674	0.00014258		SiJWF03CAH_pcr_1	1.25158	1.24084	1.29279	1.16179	1.23675	0.0547618	4	45.1684	2.38892e-05
SiJWF05ACA_pcr_2	-2.07576	-2.15728	-1.58369	-1.7747	-1.89786	0.266346	4	14.2511	0.000748655		SiJWC02BAD_pcr_1	1.0979	1.16373	1.38567	1.31845	1.24144	0.133383	4	18.6147	0.000338383
SiJWH12ACZ_pcr_1	-1.92642	-1.85122	-1.94463	-1.85999	-1.89556	0.046875	4	80.8774	4.16629e-06		SiJWH03ADZ_pcr_1	1.20909	1.15493	1.15619	1.44789	1.24203	0.139545	4	17.8011	0.000386564
SiJWD01BDV_pcr_1	-1.59097	-1.85259	-1.94058	-2.17152	-1.88892	0.239882	4	15.7487	0.000556504		SiJWE11BDC_pcr_1	1.2748	1.20332	1.33512	1.15732	1.24264	0.0783454	4	31.7221	6.88388e-05
SiJWG09BCG_pcr_1	-1.64271	-1.889	-1.91738	-2.09594	-1.88626	0.186418	4	20.2368	0.000263779		SiJWA09ABE_pcr_2	1.19448	1.26842	1.14169	1.36774	1.24308	0.0980242	4	25.3628	0.000134418
SiJWA06ABU_pcr_2	-1.978	-2.1147	-1.71932	-1.73096	-1.88574	0.193722	4	19.4685	0.000296048		SiJWG08BBB_pcr_1	1.31378	1.15258	1.14854	1.36461	1.24488	0.11088	4	22.4546	0.000193403
SiJWF04BEA_pcr_2	-1.75152	-1.652	-2.01563	-2.105	-1.88104	0.21409	4	17.5724	0.000401732		SiJWH09BDZ_pcr_1	1.24231	1.42492	1.12554	1.18749	1.24506	0.129043	4	19.2969	0.000303966
SiJWC08BDH_pcr_1	-2.03285	-2.01813	-1.87415	-1.59121	-1.87908	0.204838	4	18.347	0.000353303		SiJWD06AEA_pcr_1	1.11577	1.07721	1.4373	1.35089	1.24529	0.17611	4	14.1422	0.000765879
SiJWD09ADY_pcr_newprimers	-1.63672	-1.92395	-1.95189	-1.99877	-1.87783	0.163677	4	22.9456	0.000181306		SiJWA04BAV_pcr_1	1.35888	1.15494	1.2163	1.25357	1.24592	0.0855845	4	29.1156	8.89715e-05
SiJWH02BCN_pcr_1	-1.95921	-1.84513	-1.84875	-1.85245	-1.87638	0.0552997	4	67.8624	7.05088e-06		SiJWF04BDR_pcr_1	1.29777	1.4262	1.09778	1.16662	1.24709	0.145393	4	17.1548	0.000431547
SiJWA10BCM_pcr_1	-1.57844	-1.75252	-2.02834	-2.11999	-1.86982	0.249248	4	15.0037	0.000642645		SiJWF07ADV_pcr_1	1.15191	1.27235	1.26931	1.3011	1.24867	0.0660727	4	37.7967	4.07394e-05
SiJWD01BBJ_pcr_1	-1.6283	-2.25928	-1.68248	-1.90382	-1.86847	0.286505	4	13.0432	0.000973211		SiJWE08AAN_pcr_2	1.28754	1.46945	1.06675	1.17135	1.24877	0.172558	4	14.4736	0.00071503
SiJWD03BCP_pcr_1	-1.78994	-1.89527	-1.64527	-2.14313	-1.86841	0.209874	4	17.8051	0.000386305		SiJWE01ADW_pcr_1	1.23432	1.13785	1.30702	1.32366	1.25071	0.0846509	4	29.5499	8.51165e-05
SiJWF03BBP_pcr_1	-1.98647	-2.07296	-1.8224	-1.56725	-1.86227	0.222443	4	16.7438	0.000463831		SiJWD05ABY_pcr_2	1.29742	1.28033	1.27684	1.15861	1.2533	0.0637628	4	39.3113	3.62166e-05
SiJWB10BBI_pcr_1	-1.60131	-1.65531	-2.07753	-2.0916	-1.85644	0.2644	4	14.0426	0.000782081		SiJWD02ADK_pcr_1	1.3841	1.22059	1.26154	1.18469	1.26273	0.0867922	4	29.0978	8.91346e-05
SiJWC10ACB_pcr_2	-1.89784	-1.8886	-2.00114	-1.62383	-1.85285	0.160979	4	23.0198	0.000179567		SiJWG02AAQ_pcr_2	1.33167	1.33012	1.10775	1.28201	1.26289	0.10596	4	23.8371	0.000161796
SiJWE10BBQ_pcr_1	-1.9512	-2.12812	-1.7074	-1.618	-1.85118	0.232196	4	15.945	0.000536395		SiJWG10ADY_pcr_newprimers	1.21525	1.42264	1.16368	1.25067	1.26306	0.112222	4	22.51	0.000191986
SiJWG12BAK_pcr_2	-1.50926	-1.93512	-1.98956	-1.96876	-1.85068	0.228712	4	16.1835	0.000513238		SiJWA11ABQ_pcr_2	1.42896	1.26103	1.29387	1.08793	1.26795	0.140298	4	18.075	0.000369378
SiJWH07ADS_pcr_1	-1.54405	-1.81083	-1.99743	-2.03144	-1.84594	0.223408	4	16.5253	0.000482312		SiJWH05BDP_pcr_1	1.0508	1.37224	1.24096	1.41244	1.26911	0.162922	4	15.5794	0.000574668
SiJWC03ADI_pcr_1	-1.62653	-1.74723	-1.95993	-2.0449	-1.84465	0.191883	4	19.2268	0.000307282		SiJWC04BAL_pcr_1	1.12495	1.26724	1.30389	1.38616	1.27056	0.109069	4	23.2983	0.000173231
SiJWE10AAH_pcr_2	-1.63294	-1.85455	-1.87844	-2.00719	-1.84328	0.155424	4	23.7194	0.000164206		SiJWF05CAX_pcr_1	1.01116	1.3588	1.25343	1.46043	1.27095	0.192718	4	13.1898	0.000941545
SiJWC12BBD_pcr_1	-2.10297	-1.9112	-1.77212	-1.58072	-1.84175	0.220638	4	16.6948	0.000467896		SiJWH12BDV_pcr_1	1.28535	1.29551	1.20801	1.29645	1.27133	0.0425081	4	59.8159	1.0294e-05
SiJWC09BBS_pcr_1	-1.85618	-1.93746	-1.85759	-1.70319	-1.83861	0.0979425	4	37.5446	4.15643e-05		SiJWF08CAH_pcr_1	1.40961	1.31654	1.22123	1.13988	1.27182	0.116838	4	21.7706	0.000212114
SiJWE11ACY_pcr_1	-1.96994	-2.12099	-1.71185	-1.54841	-1.8378	0.256429	4	14.3338	0.000735923		SiJWH12ADE_pcr_1	1.18895	1.49869	1.15829	1.25449	1.27511	0.154363	4	16.5209	0.000482692
SiJWE06BAH_pcr_2	-1.62693	-2.14915	-1.75802	-1.81408	-1.83704	0.222359	4	16.5232	0.000482489		SiJWC05ACL_pcr_2	1.43728	1.36502	1.23732	1.07929	1.27973	0.157133	4	16.2885	0.000503459
SiJWG02BAH_pcr_2	-1.91846	-1.93042	-1.66284	-1.83322	-1.83624	0.123433	4	29.7527	8.33927e-05		SiJWF01BBA_pcr_1	1.26018	1.25346	1.22764	1.37844	1.27993	0.0671551	4	38.1187	3.97176e-05
SiJWD02ACH_pcr_2	-1.90078	-2.0088	-1.68795	-1.74639	-1.83598	0.146066	4	25.1391	0.000138023		SiJWG05ACD_pcr_2	1.2871	1.30797	1.15861	1.36687	1.28014	0.0877752	4	29.1685	8.84899e-05
SiJWF09BCY_pcr_1	-1.82102	-1.88507	-1.74299	-1.88695	-1.83401	0.0679803	4	53.9569	1.40214e-05		SiJWD04AAP_pcr_2	1.34774	1.48196	1.07411	1.22666	1.28262	0.173765	4	14.7627	0.000674288
SiJWB11BAM_pcr_1	-1.84276	-1.91705	-1.78096	-1.7857	-1.83162	0.0635013	4	57.6876	1.1475e-05		SiJWE03BCJ_pcr_1	1.48675	1.3215	1.1492	1.17442	1.28297	0.155656	4	16.4846	0.000485859
SiJWE06ABS_pcr_2	-1.55561	-1.83996	-1.90568	-2.0034	-1.82616	0.192464	4	18.9766	0.000319513		SiJWB05BAG_pcr_2	1.44031	1.38984	1.19581	1.1142	1.28504	0.155176	4	16.5623	0.000479111
SiJWB11ABO_pcr_2	-1.82891	-1.9168	-1.64381	-1.91036	-1.82497	0.127223	4	28.6894	9.29845e-05		SiJWC02BAF_pcr_1	1.28621	1.28949	1.3136	1.2518	1.28528	0.0254419	4	101.036	2.1374e-06
SiJWE02BBZ_pcr_1	-1.70038	-1.54954	-1.95599	-2.09244	-1.82459	0.245008	4	14.8941	0.000656784		SiJWE07ADV_pcr_1	1.3263	1.11078	1.52179	1.18245	1.28533	0.181334	4	14.1764	0.000760409
SiJWG06ADD_pcr_1	-2.0605	-2.00145	-1.68717	-1.52701	-1.81903	0.254461	4	14.2971	0.00074153		SiJWD01BCT_pcr_1	1.35898	1.48226	1.07504	1.22925	1.28638	0.174709	4	14.726	0.00067929
SiJWB02AAT_pcr_2	-1.76973	-1.807	-1.77792	-1.92058	-1.81881	0.0697055	4	52.1855	1.5497e-05		SiJWH09BDN_pcr_1	1.28145	1.12455	1.54641	1.19401	1.2866	0.184719	4	13.9304	0.000800907
SiJWD02ADB_pcr_1	-1.63805	-1.57116	-2.02404	-2.03496	-1.81705	0.246868	4	14.7208	0.000679994		SiJWC01ACC_pcr_2	1.3023	1.51004	1.16165	1.17504	1.28726	0.161481	4	15.9431	0.000536578
SiJWD02ABD_pcr_2	-1.65439	-1.78487	-1.96987	-1.84734	-1.81412	0.131316	4	27.6298	0.000104062		SiJWE02BAP_pcr_1	1.26483	1.17221	1.33281	1.37939	1.28731	0.0900059	4	28.605	9.38072e-05
SiJWE10ADL_pcr_1	-1.7638	-1.83102	-1.86633	-1.78802	-1.81229	0.0455014	4	79.6587	4.36038e-06		SiJWC03ACA_pcr_2	1.33525	1.41125	1.22612	1.21118	1.29595	0.0946931	4	27.3716	0.000107026
SiJWE06BDO_pcr_1	-1.4876	-1.6955	-1.99452	-2.0702	-1.81196	0.270058	4	13.419	0.000894731		SiJWD04BBB_pcr_1	1.11905	1.17922	1.36055	1.56232	1.30529	0.199744	4	13.0696	0.000967407
SiJWD08BCQ_pcr_1	-1.96257	-2.10866	-1.59512	-1.58136	-1.81193	0.265148	4	13.6673	0.000847453		SiJWG11BCA_pcr_1	1.29716	1.05618	1.43094	1.4386	1.30572	0.178586	4	14.6229	0.000693594
SiJWD10ADZ_pcr_1	-1.59896	-1.54802	-2.05267	-2.04106	-1.81018	0.274132	4	13.2066	0.000938001		SiJWG10ADY_pcr_1	1.19788	1.1	1.43451	1.49286	1.30632	0.187578	4	13.9282	0.000801273
SiJWH11AAY_pcr_2	-1.59945	-2.20496	-1.78176	-1.63581	-1.8055	0.277719	4	13.0023	0.000982279		SiJWC04BDY_pcr_1	1.04815	1.38756	1.35425	1.43565	1.3064	0.175378	4	14.8981	0.000656258
SiJWG07BBQ_pcr_1	-1.8889	-2.07125	-1.63788	-1.61195	-1.8025	0.218403	4	16.5062	0.000483975		SiJWA01CAJ_pcr_1	1.37233	1.51336	1.29712	1.04828	1.30777	0.194835	4	13.4244	0.000893673
SiJWB07ACN_pcr_2	-1.9673	-2.10451	-1.58321	-1.54986	-1.80122	0.277054	4	13.0026	0.00098221		SiJWH02BCD_pcr_1	1.49953	1.13885	1.29845	1.30858	1.31135	0.147584	4	17.771	0.000388516
SiJWA06AAB_pcr_1	-1.68274	-1.87563	-1.95948	-1.68358	-1.80036	0.139592	4	25.7946	0.000127803		SiJWC04AAH_pcr_2	1.34563	1.39306	1.27688	1.23908	1.31366	0.0688954	4	38.135	3.96667e-05
SiJWC07ACV_pcr_2	-1.51937	-1.94676	-1.93437	-1.79595	-1.79911	0.198626	4	18.1156	0.00036692		SiJWD12ACW_pcr_2	1.13213	1.1903	1.36671	1.56605	1.3138	0.195522	4	13.4389	0.00089082
SiJWG06BBS_pcr_1	-1.82863	-1.73278	-1.87689	-1.75153	-1.79746	0.0672652	4	53.4439	1.44288e-05		SiJWF01AAK_pcr_2	1.39725	1.27961	1.11558	1.46514	1.3144	0.15311	4	17.1693	0.000430459
SiJWG01CAI_pcr_1	-1.70924	-1.48993	-2.01186	-1.92324	-1.78357	0.233361	4	15.2859	0.000608058		SiJWE06BDC_pcr_1	1.41409	1.43875	1.26648	1.14466	1.316	0.137234	4	19.1788	0.000309578
SiJWE10ABY_pcr_2	-1.7747	-2.02191	-1.56558	-1.76828	-1.78262	0.186756	4	19.0903	0.000313877		SiJWB01CAF_pcr_1	1.27736	1.37308	1.33344	1.28141	1.31632	0.0456479	4	57.6728	1.14839e-05
SiJWE02ACB_pcr_2	-1.65817	-1.54492	-1.97639	-1.9509	-1.78259	0.214364	4	16.6315	0.000473211		SiJWH06AAS_pcr_2	1.34272	1.36515	1.32633	1.2488	1.32075	0.0505359	4	52.2698	1.54222e-05
SiJWA12ACF_pcr_2	-1.68202	-2.02567	-1.53514	-1.86257	-1.77635	0.213446	4	16.6445	0.000472112		SiJWA07ADY_pcr_1	1.41987	1.18741	1.46946	1.22439	1.32528	0.140144	4	18.9131	0.000322723
SiJWC03ABA_pcr_2	-1.53719	-1.7622	-1.69484	-2.1039	-1.77453	0.238968	4	14.8516	0.000662377		SiJWA11ABR_pcr_2	1.38649	1.13055	1.4675	1.32467	1.3273	0.143618	4	18.4837	0.000345577
SiJWD06ACO_pcr_2	-1.893	-1.73503	-1.72147	-1.73362	-1.77078	0.0817071	4	43.3446	2.70293e-05		SiJWB04CAS_pcr_1	1.35601	1.38701	1.30564	1.29064	1.33482	0.0446344	4	59.8114	1.02963e-05
SiJWH04BDF_pcr_1	-1.49236	-1.73595	-1.76114	-2.09156	-1.77025	0.246116	4	14.3855	0.000728099		SiJWD06ABL_pcr_2	1.41342	1.32994	1.34242	1.26707	1.33821	0.0600108	4	44.599	2.48148e-05
SiJWG05ABE_pcr_2	-1.70046	-1.76029	-1.79158	-1.81616	-1.76712	0.0499793	4	70.7143	6.23213e-06		SiJWD01BBQ_pcr_1	1.32777	1.30943	1.36104	1.36923	1.34187	0.0280877	4	95.5483	2.52715e-06
SiJWH10BAD_pcr_1	-1.53358	-1.74034	-1.9386	-1.84678	-1.76483	0.174153	4	20.2676	0.000262586		SiJWA10BDR_pcr_1	1.34485	1.31313	1.50613	1.20812	1.34306	0.123421	4	21.7638	0.000212312
SiJWB10BDU_pcr_1	-1.79529	-1.7837	-1.76169	-1.70124	-1.76048	0.0418817	4	84.0692	3.70971e-06		SiJWG05AAP_pcr_2	1.53702	1.27217	1.44573	1.11772	1.34316	0.186159	4	14.4303	0.000721424
SiJWH03BAR_pcr_1	-1.43847	-1.70276	-1.88545	-2.01343	-1.76003	0.249414	4	14.1133	0.000770535		SiJWF05ABP_pcr_2	1.22392	1.38873	1.29066	1.47088	1.34355	0.108572	4	24.7494	0.000144621
SiJWF01AAX_pcr_2	-1.41941	-1.91527	-1.77452	-1.92698	-1.75904	0.236784	4	14.8578	0.000661562		SiJWG02ACI_pcr_2	1.40238	1.39205	1.20662	1.37334	1.3436	0.0921083	4	29.1743	8.84372e-05
SiJWA11ADG_pcr_1	-1.83139	-2.06248	-1.60861	-1.51442	-1.75422	0.244734	4	14.3358	0.000735619		SiJWA05AAY_pcr_1	1.36373	1.35178	1.3098	1.35663	1.34549	0.0242914	4	110.779	1.62172e-06
SiJWH03BDK_pcr_1	-1.86345	-1.46478	-1.81971	-1.84321	-1.74779	0.189514	4	18.445	0.000347744		SiJWC08BBO_pcr_1	1.16228	1.35544	1.48792	1.3772	1.34571	0.135348	4	19.8852	0.000277934
SiJWH11AAY_pcr_1	-1.60774	-1.68006	-1.90798	-1.76845	-1.74106	0.129239	4	26.9432	0.000112195		SiJWC02ADM_pcr_1	1.35618	1.47625	1.38252	1.18577	1.35018	0.121114	4	22.296	0.00019754
SiJWG12ACT_pcr_2	-1.51585	-1.66023	-1.80391	-1.95505	-1.73376	0.188661	4	18.3796	0.000351442		SiJWA09BBN_pcr_1	1.37391	1.09996	1.3292	1.60955	1.35316	0.208843	4	12.9586	0.000992127
SiJWE10BBT_pcr_1	-1.7093	-1.50817	-1.61911	-2.0946	-1.7328	0.25484	4	13.5991	0.000860101		SiJWA12AAR_pcr_2	1.22947	1.2015	1.57422	1.42347	1.35716	0.175162	4	15.496	0.000583897
SiJWB05BCU_pcr_1	-1.65042	-1.69059	-1.57085	-2.01042	-1.73057	0.193087	4	17.9253	0.000378641		SiJWD11AAR_pcr_2	1.37835	1.48466	1.20246	1.37119	1.35917	0.116643	4	23.3048	0.000173087
SiJWA08ACN_pcr_2	-1.92416	-1.5757	-1.8975	-1.51683	-1.72855	0.212127	4	16.2973	0.000502652		SiJWA12ABM_pcr_2	1.36202	1.18487	1.50385	1.40425	1.36375	0.133252	4	20.4687	0.000254966
SiJWG01ADV_pcr_1	-1.70817	-1.87852	-1.57869	-1.74219	-1.72689	0.123204	4	28.0331	9.96485e-05		SiJWG12ADE_pcr_1	1.50173	1.27105	1.421	1.26653	1.36508	0.115981	4	23.5397	0.000167978
SiJWH11ACP_pcr_2	-1.66922	-1.90835	-1.58538	-1.74253	-1.72637	0.137261	4	25.1546	0.00013777		SiJWE08BAK_pcr_2	1.2943	1.52595	1.47064	1.17272	1.3659	0.162308	4	16.831	0.000456722
SiJWH08ACM_pcr_2	-1.63081	-1.56532	-1.98141	-1.72625	-1.72595	0.182678	4	18.8961	0.00032359		SiJWB06AAQ_pcr_2	1.07973	1.37092	1.5097	1.51365	1.3685	0.203634	4	13.4408	0.000890445
SiJWH02BCX_pcr_1	-1.72084	-1.64606	-1.75852	-1.77749	-1.72573	0.0580944	4	59.4111	1.05057e-05		SiJWD12BBB_pcr_1	1.36207	1.21771	1.44254	1.45454	1.36922	0.109027	4	25.117	0.000138386
SiJWC05ABC_pcr_2	-1.82934	-1.93116	-1.47236	-1.66801	-1.72522	0.200386	4	17.2189	0.00042678		SiJWG01BCN_pcr_1	1.44135	1.47559	1.265	1.2974	1.36983	0.104141	4	26.3073	0.0001205
SiJWD04ABF_pcr_2	-1.82741	-1.78628	-1.58265	-1.70205	-1.7246	0.108065	4	31.9179	6.75828e-05		SiJWE04ADK_pcr_1	1.59681	1.36282	1.317	1.21366	1.37257	0.161988	4	16.9466	0.000447516
SiJWD09ADH_pcr_1	-1.6085	-1.86008	-1.59232	-1.83545	-1.72409	0.143316	4	24.0599	0.000157359		SiJWE08BDZ_pcr_1	1.10906	1.36107	1.45428	1.57279	1.3743	0.196914	4	13.9584	0.000796156
SiJWD10BDW_pcr_2	-1.49439	-1.69053	-1.78751	-1.90659	-1.71976	0.174303	4	19.733	0.000284376		SiJWD04BCI_pcr_1	1.18254	1.21532	1.5458	1.56497	1.37716	0.206381	4	13.3458	0.000909347
SiJWD09ADY_pcr_1	-1.76571	-1.7872	-1.62965	-1.69355	-1.71903	0.0717977	4	47.8853	2.00532e-05		SiJWA01ABJ_pcr_2	1.26012	1.24276	1.50746	1.49978	1.37753	0.145802	4	18.8958	0.000323602
SiJWH01BAC_pcr_1	-1.73008	-1.93861	-1.62219	-1.58105	-1.71798	0.159947	4	21.4819	0.000220736		SiJWH11BBY_pcr_1	1.59308	1.44537	1.31124	1.17002	1.37993	0.181198	4	15.2312	0.000614571
SiJWC03AAU_pcr_2	-1.52937	-1.81197	-1.90555	-1.62427	-1.71779	0.171631	4	20.0172	0.000272504		SiJWC08AAT_pcr_2	1.44847	1.43141	1.32364	1.32087	1.3811	0.0683111	4	40.4355	3.32833e-05
SiJWH05ACS_pcr_2	-1.52832	-1.60108	-1.64279	-2.09767	-1.71746	0.257847	4	13.3216	0.000914247		SiJWD01ADY_pcr_1	1.41254	1.39495	1.32838	1.39564	1.38288	0.0372282	4	74.2918	5.37483e-06
SiJWD01ABB_pcr_2	-1.95804	-1.92113	-1.53821	-1.45078	-1.71704	0.259879	4	13.2142	0.00093641		SiJWF04ABE_pcr_2	1.23121	1.23831	1.5209	1.54342	1.38346	0.171974	4	16.0892	0.000522226
SiJWE12BAQ_pcr_1	-1.60077	-1.58659	-1.98285	-1.66949	-1.70993	0.185519	4	18.434	0.000348364		SiJWA06BCY_pcr_1	1.41537	1.40196	1.40871	1.32856	1.38865	0.040432	4	68.6906	6.79904e-06
SiJWE11ADZ_pcr_1	-1.59625	-1.93785	-1.45622	-1.83394	-1.70606	0.219513	4	15.5441	0.000578553		SiJWG04BBN_pcr_1	1.22816	1.45725	1.64823	1.24731	1.39524	0.198031	4	14.0911	0.00077414
SiJWC10AAJ_pcr_2	-1.77772	-1.87849	-1.48418	-1.68283	-1.70581	0.167966	4	20.3113	0.000260905		SiJWE01BAU_pcr_1	1.57022	1.54152	1.26154	1.22352	1.3992	0.181948	4	15.3802	0.000597051
SiJWA06BDP_pcr_1	-1.46361	-1.79432	-1.69247	-1.87059	-1.70525	0.176845	4	19.2852	0.000304518		SiJWA06ACZ_pcr_1	1.27885	1.17813	1.52129	1.63763	1.40398	0.212148	4	13.2358	0.000931898
SiJWH05BBE_pcr_1	-1.73272	-1.53132	-1.84112	-1.71053	-1.70393	0.128435	4	26.5337	0.000117453		SiJWE04BBS_pcr_1	1.39122	1.1737	1.61924	1.46347	1.41191	0.185128	4	15.2533	0.000611926
SiJWG12ACA_pcr_2	-1.45133	-1.83063	-1.66232	-1.86164	-1.70148	0.18836	4	18.0663	0.000369911		SiJWH02ADD_pcr_1	1.38465	1.38849	1.43685	1.44207	1.41302	0.0306485	4	92.2078	2.81179e-06
SiJWA01BAO_pcr_1	-1.54453	-1.6957	-1.84585	-1.70587	-1.69799	0.123125	4	27.5814	0.000104609		SiJWD07CAA_pcr_1	1.32673	1.35822	1.42768	1.54311	1.41393	0.0958889	4	29.4911	8.56258e-05
SiJWD07BDN_pcr_1	-1.46534	-2.04232	-1.6584	-1.61719	-1.69581	0.245468	4	13.817	0.000820543		SiJWD03BBX_pcr_1	1.36092	1.47316	1.39941	1.42721	1.41518	0.0472585	4	59.8908	1.02554e-05
SiJWG06BAI_pcr_2	-1.57178	-1.79304	-1.87292	-1.54284	-1.69514	0.162895	4	20.8128	0.000242596		SiJWG11ADK_pcr_1	1.52099	1.25403	1.58322	1.31551	1.41844	0.158422	4	17.907	0.000379793
SiJWD06BDU_pcr_1	-1.57539	-2.00044	-1.54777	-1.65546	-1.69477	0.208837	4	16.2305	0.000508829		SiJWF12BAT_pcr_1	1.2808	1.28738	1.50101	1.61023	1.41986	0.163006	4	17.4209	0.000412223
SiJWH04BCO_pcr_1	-1.33892	-1.80206	-1.78297	-1.82517	-1.68728	0.23288	4	14.4905	0.00071256		SiJWF05AAJ_pcr_2	1.25167	1.26528	1.46131	1.70129	1.41989	0.210639	4	13.4817	0.000882464
SiJWG02BBN_pcr_1	-1.65489	-1.5508	-1.94095	-1.597	-1.68591	0.175281	4	19.2366	0.000306814		SiJWF01BAB_pcr_1	1.52764	1.53952	1.41046	1.20621	1.42096	0.154559	4	18.3873	0.000351003
SiJWG07BCA_pcr_1	-1.70744	-1.58755	-1.7273	-1.69422	-1.67913	0.0625452	4	53.6933	1.42288e-05		SiJWD08BAT_pcr_1	1.31557	1.64527	1.32658	1.4038	1.4228	0.153416	4	18.5483	0.000342005
SiJWH03BDE_pcr_1	-1.79307	-1.38684	-1.60665	-1.89939	-1.67148	0.225056	4	14.8539	0.000662072		SiJWB04CAD_pcr_1	1.53231	1.41609	1.36625	1.37865	1.42333	0.0756805	4	37.6141	4.13349e-05
SiJWB10ADR_pcr_1	-1.7162	-1.57132	-1.59023	-1.80789	-1.67141	0.111416	4	30.0031	8.13275e-05		SiJWH12AAH_pcr_2	1.58424	1.27893	1.3963	1.43653	1.424	0.126021	4	22.5994	0.000189727
SiJWF08ADS_pcr_1	-1.61422	-1.64646	-1.57024	-1.85161	-1.67063	0.124634	4	26.8086	0.000113888		SiJWC08AAK_pcr_2	1.23076	1.48814	1.32191	1.65699	1.42445	0.188115	4	15.1445	0.000625076
SiJWB12BDO_pcr_1	-1.85463	-1.63452	-1.46981	-1.72263	-1.6704	0.161443	4	20.6933	0.000246798		SiJWA04CAG_pcr_1	1.31854	1.24983	1.62044	1.51887	1.42692	0.172251	4	16.568	0.000478627
SiJWE04ACS_pcr_1	-1.73508	-1.92157	-1.49165	-1.53127	-1.66989	0.198812	4	16.7987	0.000459333		SiJWH11CAF_pcr_1	1.35122	1.57045	1.49322	1.29985	1.42869	0.124986	4	22.8616	0.000183302
SiJWA06AEA_pcr_1	-1.50014	-1.63655	-1.77414	-1.75733	-1.66704	0.127029	4	26.2466	0.000121335		SiJWF08BCI_pcr_1	1.53897	1.4782	1.11334	1.58791	1.42961	0.215568	4	13.2636	0.000926125
SiJWD08BDS_pcr_1	-1.55413	-1.80727	-1.65266	-1.63202	-1.66152	0.106029	4	31.3408	7.13761e-05		SiJWE04ACE_pcr_2	1.57532	1.32211	1.44353	1.38982	1.43269	0.107281	4	26.7092	0.000115159
SiJWA08ACU_pcr_2	-1.79678	-1.85533	-1.5669	-1.42405	-1.66076	0.200999	4	16.5251	0.000482326		SiJWB05BDT_pcr_1	1.62486	1.5637	1.22394	1.3206	1.43327	0.191689	4	14.9542	0.000648987
SiJWB04BDF_pcr_1	-1.55993	-1.90963	-1.4053	-1.74987	-1.65618	0.220013	4	15.0553	0.000636135		SiJWA11BAF_pcr_1	1.39151	1.53621	1.37667	1.4315	1.43397	0.0719846	4	39.8411	3.4793e-05
SiJWB11BBM_pcr_1	-1.73934	-1.51677	-1.72757	-1.63622	-1.65497	0.103023	4	32.1282	6.62671e-05		SiJWC01BCF_pcr_1	1.56553	1.34007	1.33612	1.50591	1.43691	0.116676	4	24.6307	0.000146712
SiJWF02ACS_pcr_2	-1.63377	-1.65483	-1.66928	-1.65844	-1.65408	0.0148699	4	222.474	2.00264e-07		SiJWE03AAD_pcr_2	1.55867	1.2235	1.57805	1.42052	1.44519	0.163589	4	17.6685	0.000395266
SiJWG02BCW_pcr_1	-1.75557	-1.45462	-1.55863	-1.82655	-1.64884	0.172076	4	19.1642	0.000310284		SiJWB04ABY_pcr_2	1.28881	1.30374	1.51049	1.68845	1.44787	0.189624	4	15.2709	0.000609832
SiJWD04BCJ_pcr_1	-1.64914	-1.89223	-1.32628	-1.72642	-1.64852	0.237557	4	13.8789	0.000809742		SiJWB11AAQ_pcr_2	1.38603	1.2839	1.48256	1.64141	1.44848	0.152064	4	19.0509	0.000315817
SiJWB05CAL_pcr_1	-1.6877	-1.52982	-1.70261	-1.65725	-1.64435	0.0786482	4	41.8152	3.01005e-05		SiJWA04CAG_pcr_1	1.29434	1.39295	1.66633	1.44315	1.44919	0.157405	4	18.4135	0.000349516
SiJWH11BDP_pcr_1	-1.73901	-1.70606	-1.4566	-1.63549	-1.63429	0.126083	4	25.9241	0.000125903		SiJWG11ACH_pcr_2	1.42519	1.52315	1.55649	1.29848	1.45083	0.115847	4	25.0474	0.00013954
SiJWB01BAD_pcr_1	-1.61755	-1.81641	-1.58254	-1.51952	-1.63401	0.128191	4	25.4932	0.000132372		SiJWF01BDT_pcr_1	1.41457	1.34926	1.47702	1.58176	1.45565	0.0989398	4	29.425	8.62019e-05
SiJWG06AAF_pcr_2	-1.40288	-1.55639	-1.74227	-1.83111	-1.63316	0.191496	4	17.0569	0.000438959		SiJWG07CAM_pcr_1	1.43021	1.62128	1.45145	1.32481	1.45694	0.122761	4	23.7362	0.000163859
SiJWC09BBZ_pcr_1	-1.68965	-1.83613	-1.44702	-1.55217	-1.63124	0.168901	4	19.316	0.00030307		SiJWH10ADN_pcr_1	1.23187	1.51957	1.49776	1.57974	1.45723	0.154191	4	18.9017	0.000323301
SiJWF09BBX_pcr_1	-1.81977	-1.54165	-1.51895	-1.63589	-1.62907	0.136849	4	23.8082	0.000162383		SiJWD04BAO_pcr_1	1.36901	1.44455	1.49853	1.5204	1.45812	0.0674189	4	43.2556	2.71962e-05
SiJWF02BBD_pcr_1	-1.60305	-1.51009	-1.64927	-1.74891	-1.62783	0.0993269	4	32.7772	6.24167e-05		SiJWF09ADX_pcr_1	1.35937	1.35689	1.57577	1.54166	1.45842	0.116648	4	25.0056	0.000140238
SiJWG12AAO_pcr_2	-1.52508	-1.50093	-1.83145	-1.62813	-1.6214	0.150507	4	21.5459	0.000218787		SiJWF05AAW_pcr_2	1.43856	1.33669	1.65725	1.4069	1.45985	0.138313	4	21.1094	0.000232566
SiJWD09ABU_pcr_2	-1.36189	-1.55463	-1.83183	-1.72685	-1.6188	0.205895	4	15.7245	0.000559051		SiJWB12BDZ_pcr_1	1.23377	1.60353	1.50984	1.50019	1.46183	0.159023	4	18.3852	0.000351126
SiJWC04BAJ_pcr_2	-1.52913	-1.32568	-1.73382	-1.88218	-1.6177	0.242594	4	13.3367	0.000911186		SiJWD02BAT_pcr_1	1.53425	1.65493	1.18532	1.51186	1.47159	0.200926	4	14.6481	0.000690067
SiJWD08AAC_pcr_2	-1.45498	-1.80459	-1.72424	-1.47893	-1.61568	0.175117	4	18.4526	0.000347316		SiJWB06CAW_pcr_1	1.6076	1.65134	1.4698	1.16139	1.47253	0.221383	4	13.303	0.000918023
SiJWG12CAX_pcr_1	-1.50544	-1.78144	-1.53392	-1.63795	-1.61469	0.124906	4	25.8545	0.000126919		SiJWB10BCS_pcr_1	1.23324	1.49859	1.57891	1.58356	1.47357	0.164902	4	17.8721	0.000382005
SiJWC01ABM_pcr_2	-1.37387	-1.72499	-1.61379	-1.73455	-1.6118	0.167821	4	19.2086	0.000308152		SiJWB01ADH_pcr_1	1.44713	1.63683	1.25356	1.55916	1.47417	0.166414	4	17.7169	0.000392054
SiJWB02BAW_pcr_1	-1.75702	-1.66909	-1.54033	-1.47177	-1.60955	0.127888	4	25.1713	0.000137496		SiJWB08BAX_pcr_1	1.39118	1.21852	1.60167	1.6876	1.47474	0.211386	4	13.9531	0.000797051
SiJWC06CAM_pcr_1	-1.5128	-1.61835	-1.47035	-1.82111	-1.60565	0.156536	4	20.5147	0.000253264		SiJWA02ADO_pcr_1	1.46977	1.73103	1.42119	1.28607	1.47701	0.186325	4	15.8542	0.000545571
SiJWG01ACH_pcr_2	-1.36687	-1.46793	-1.69132	-1.88179	-1.60198	0.230596	4	13.8942	0.000807097		SiJWA04BCS_pcr_1	1.73998	1.44826	1.41496	1.33255	1.48393	0.177487	4	16.7216	0.000465662
SiJWD08AAC_pcr_1	-1.48177	-1.70317	-1.7087	-1.50375	-1.59935	0.123425	4	25.9161	0.00012602		SiJWF06BDC_pcr_1	1.40505	1.58362	1.49699	1.45265	1.48458	0.0759568	4	39.0901	3.68339e-05
SiJWD09ACP_pcr_2	-1.64792	-1.81974	-1.38033	-1.54906	-1.59926	0.183874	4	17.3952	0.000414037		SiJWF07ABV_pcr_2	1.18612	1.5866	1.51758	1.65993	1.48755	0.209196	4	14.2217	0.000753257
SiJWE12AAX_pcr_1	-1.76564	-1.62484	-1.4658	-1.53138	-1.59692	0.130044	4	24.5597	0.000147984		SiJWC10BBJ_pcr_1	1.32065	1.68278	1.66249	1.28432	1.48756	0.21438	4	13.8778	0.00080994
SiJWA02ABL_pcr_2	-1.35571	-1.53406	-1.92583	-1.56966	-1.59632	0.238787	4	13.3702	0.000904441		SiJWE11ACV_pcr_2	1.59038	1.46411	1.39772	1.49945	1.48792	0.0802763	4	37.0699	4.31789e-05
SiJWE06BCK_pcr_1	-1.51474	-1.4719	-1.59758	-1.79701	-1.59531	0.144234	4	22.1212	0.000202236		SiJWD08BAO_pcr_1	1.30454	1.56224	1.57937	1.51615	1.49057	0.126864	4	23.4987	0.000168855
SiJWE02BCQ_pcr_1	-1.55489	-1.69001	-1.42388	-1.69175	-1.59013	0.128041	4	24.8378	0.000143088		SiJWF06CAW_pcr_1	1.44402	1.55153	1.37699	1.59214	1.49117	0.098483	4	30.2828	7.91009e-05
SiJWC12ADJ_pcr_1	-1.52794	-1.63553	-1.4318	-1.76494	-1.59005	0.143241	4	22.201	0.000200072		SiJWG05BAL_pcr_1	1.31567	1.30912	1.68016	1.67549	1.49511	0.211006	4	14.1712	0.000761232
SiJWH02CAX_pcr_1	-1.61468	-1.81011	-1.41112	-1.52328	-1.5898	0.168825	4	18.8337	0.000326794		SiJWF08BCO_pcr_1	1.51033	1.61433	1.33457	1.52314	1.49559	0.116909	4	25.5855	0.000130949
SiJWA03BBE_pcr_1	-1.39147	-1.47855	-1.65768	-1.81935	-1.58676	0.190592	4	16.6509	0.000471574		SiJWC04ABH_pcr_2	1.40337	1.52489	1.5268	1.54177	1.49921	0.0643349	4	46.6064	2.17478e-05
SiJWF08CAT_pcr_1	-1.5045	-1.76702	-1.46179	-1.61312	-1.58661	0.136106	4	23.3142	0.000172877		SiJWE08AAG_pcr_2	1.47702	1.53698	1.48576	1.51685	1.50415	0.027765	4	108.349	1.73327e-06
SiJWB03AAE_pcr_2	-1.71519	-1.84425	-1.34893	-1.43694	-1.58633	0.232239	4	13.6611	0.000848585		SiJWA03BBR_pcr_1	1.57387	1.37079	1.58643	1.49217	1.50582	0.0992451	4	30.3454	7.86133e-05
SiJWF10ACM_pcr_2	-1.62875	-1.48052	-1.80841	-1.42176	-1.58486	0.172619	4	18.3625	0.000352419		SiJWH03BDP_pcr_1	1.46258	1.69136	1.48563	1.38445	1.506	0.130939	4	23.0031	0.000179956
SiJWH11ACW_pcr_2	-1.71636	-1.76904	-1.44329	-1.40141	-1.58252	0.186986	4	16.9266	0.000449085		SiJWF12ACD_pcr_2	1.42648	1.76085	1.40437	1.43313	1.50621	0.170206	4	17.6986	0.000393263
SiJWB01ACI_pcr_2	-1.45331	-1.55543	-1.64107	-1.66607	-1.57897	0.0962394	4	32.8134	6.22111e-05		SiJWH10BAH_pcr_2	1.48421	1.79494	1.33035	1.4168	1.50658	0.202292	4	14.8951	0.000656658
SiJWA05ACY_pcr_1	-1.48657	-1.58751	-1.58505	-1.61182	-1.56774	0.0554457	4	56.5503	1.21809e-05		SiJWB11BCQ_pcr_1	1.31552	1.32222	1.72156	1.67091	1.50755	0.218866	4	13.776	0.000827791
SiJWB03BAR_pcr_1	-1.46988	-1.89336	-1.36571	-1.53624	-1.5663	0.229057	4	13.676	0.000845848		SiJWG11BDC_pcr_1	1.56785	1.39167	1.57818	1.49423	1.50798	0.0860802	4	35.0367	5.11246e-05
SiJWE09ADZ_pcr_1	-1.33158	-1.80762	-1.66086	-1.46089	-1.56524	0.210856	4	14.8465	0.000663055		SiJWC08BCF_pcr_1	1.38502	1.47068	1.66596	1.53661	1.51457	0.118482	4	25.5662	0.000131246
SiJWF11ABS_pcr_2	-1.66169	-1.71827	-1.53855	-1.33446	-1.56324	0.169977	4	18.3936	0.000350645		SiJWH12BCW_pcr_1	1.52339	1.56756	1.45807	1.52478	1.51845	0.0451705	4	67.2318	7.25103e-06
SiJWA12AAE_pcr_2	-1.74217	-1.63635	-1.52366	-1.33885	-1.56026	0.172477	4	18.0923	0.000368325		SiJWB09ADZ_pcr_1	1.46544	1.51727	1.7434	1.34989	1.519	0.165151	4	18.3953	0.000350548
SiJWG11ADB_pcr_1	-1.57414	-1.52653	-1.53938	-1.60086	-1.56023	0.0337387	4	92.489	2.78623e-06		SiJWF08AA1_pcr_1	1.43994	1.31805	1.83516	1.48304	1.51905	0.222022	4	13.6837	0.000844442
SiJWH12BAD_pcr_1	-1.54655	-1.47103	-1.76806	-1.4474	-1.55826	0.14612	4	21.3286	0.000225507		SiJWA08AAP_pcr_2	1.39486	1.50986	1.60974	1.56847	1.52073	0.0933865	4	32.5686	6.36212e-05
SiJWC01ADG_pcr_1	-1.84344	-1.62345	-1.47459	-1.28147	-1.55574	0.237464	4	13.1029	0.000960136		SiJWB04ADJ_pcr_1	1.41299	1.36826	1.79924	1.51358	1.52352	0.193598	4	15.739	0.000557527
SiJWA06AAA_pcr_1	-1.62168	-1.59727	-1.50715	-1.49194	-1.55451	0.0645436	4	48.1693	1.97009e-05		SiJWC07ACH_pcr_2	1.36693	1.41757	1.77776	1.53721	1.52486	0.183089	4	16.6571	0.000471047
SiJWH12BAP_pcr_1	-1.3935	-1.53287	-1.64375	-1.64225	-1.55309	0.118385	4	26.238	0.000121454		SiJWG02BDV_pcr_1	1.70061	1.7033	1.32347	1.3734	1.52519	0.205121	4	14.8711	0.000659802
SiJWF03BCW_pcr_1	-1.42946	-1.51252	-1.74283	-1.51673	-1.55039	0.134442	4	23.064	0.000178539		SiJWC04BCA_pcr_1	1.65628	1.45202	1.56926	1.4258	1.52584	0.107016	4	28.5161	9.46851e-05
SiJWD08BBR_pcr_1	-1.48198	-1.28613	-1.698	-1.72986	-1.54899	0.206963	4	14.9687	0.000647115		SiJWA09AAW_pcr_2	1.75546	1.23242	1.53132	1.59729	1.52912	0.219022	4	13.9632	0.000795347
SiJWH02CAS_pcr_1	-1.78985	-1.60197	-1.35606	-1.44303	-1.54773	0.190841	4	16.2201	0.000509801		SiJWG05BDT_pcr_1	1.33918	1.74322	1.63382	1.401	1.5293	0.190868	4	16.0247	0.000528497
SiJWH04BCI_pcr_1	-1.43445	-1.30557	-1.79745	-1.63906	-1.54413	0.217657	4	14.1887	0.000758458		SiJWA09BDN_pcr_1	1.46179	1.32231	1.82523	1.51676	1.53152	0.212223	4	14.4332	0.000720995
SiJWF09BCO_pcr_1	-1.45622	-1.71359	-1.44526	-1.55991	-1.54375	0.124454	4	24.8083	0.000143598		SiJWB11ABU_pcr_2	1.62924	1.61091	1.50046	1.38976	1.53259	0.110918	4	27.6346	0.000104008
SiJWC09BDY_pcr_1	-1.58121	-1.81549	-1.24816	-1.51907	-1.54098	0.233236	4	13.2139	0.000936471		SiJWB09ADI_pcr_1	1.38466	1.55389	1.58982	1.60243	1.5327	0.100813	4	30.4066	7.81406e-05
SiJWD03CAF_pcr_1	-1.26178	-1.72967	-1.52665	-1.58754	-1.52641	0.195856	4	15.5871	0.000573824		SiJWA11BDT_pcr_1	1.45166	1.51699	1.59454	1.58084	1.53601	0.0656079	4	46.8238	2.14466e-05
SiJWE02AAJ_pcr_2	-1.32466	-1.70787	-1.60302	-1.44356	-1.51978	0.169495	4	17.933	0.000378159		SiJWF04AAO_pcr_2	1.58135	1.54139	1.64911	1.4077	1.54489	0.101696	4	30.3826	7.83261e-05
SiJWC05BBN_pcr_1	-1.6192	-1.74126	-1.43781	-1.27755	-1.51895	0.203576	4	14.9227	0.000653059		SiJWE12BAB_pcr_1	1.53919	1.36118	1.66044	1.62802	1.54721	0.134192	4	23.0596	0.000178642
SiJWD04ACF_pcr_2	-1.35179	-1.53001	-1.58424	-1.60862	-1.51866	0.115999	4	26.1841	0.000122203		SiJWE07ABX_pcr_2	1.59069	1.6204	1.61048	1.38286	1.55111	0.112846	4	27.4906	0.000105646
SiJWF06ACS_pcr_1	-1.55443	-1.70003	-1.32891	-1.48617	-1.51738	0.154086	4	19.6953	0.000285999		SiJWF06ADG_pcr_1	1.75283	1.34978	1.47437	1.63644	1.55336	0.177367	4	17.5157	0.000405613
SiJWC12BAU_pcr_1	-1.47235	-1.69061	-1.48545	-1.41376	-1.51554	0.120802	4	25.0913	0.000138811		SiJWF10BAG_pcr_2	1.25521	1.53817	1.80516	1.63262	1.55779	0.23002	4	13.5448	0.000870353
SiJWE04ACS_pcr_2	-1.44739	-1.69032	-1.49113	-1.43306	-1.51547	0.11915	4	25.438	0.000133233		SiJWE04CAA_pcr_1	1.7048	1.39032	1.67759	1.46095	1.55842	0.156405	4	19.928	0.000276159
SiJWA10ADD_pcr_1	-1.32387	-1.45879	-1.70723	-1.56944	-1.51483	0.162897	4	18.5986	0.000339256		SiJWC11CAI_pcr_1	1.49237	1.50436	1.64952	1.59004	1.55907	0.0743487	4	41.9394	2.98343e-05
SiJWE10AAX_pcr_2	-1.5126	-1.52357	-1.54749	-1.47241	-1.51402	0.0313308	4	96.6472	2.44194e-06		SiJWA04BAF_pcr_1	1.53369	1.70438	1.61036	1.38965	1.55952	0.13303	4	23.4462	0.000169988
SiJWH08ABP_pcr_2	-1.31699	-1.29867	-1.66655	-1.74676	-1.50724	0.2327	4	12.9544	0.000993066		SiJWG12BAB_pcr_1	1.63516	1.79249	1.35506	1.46409	1.5617	0.192256	4	16.2461	0.000507381
SiJWH11ADK_pcr_1	-1.38313	-1.32715	-1.64777	-1.662	-1.50501	0.17466	4	17.2336	0.000425699		SiJWE05CAT_pcr_1	1.6523	1.57754	1.51079	1.55748	1.57453	0.0589081	4	53.4571	1.44181e-05
SiJWB05BDM_pcr_1	-1.31328	-1.44317	-1.71637	-1.54703	-1.50496	0.170317	4	17.6725	0.000394999		SiJWF04CAM_pcr_1	1.71076	1.53693	1.37495	1.68594	1.57715	0.15512	4	20.3345	0.000260018
SiJWD10BAP_pcr_1	-1.27438	-1.7076	-1.63158	-1.38805	-1.5004	0.203182	4	14.7691	0.000673425		SiJWD01BAI_pcr_2	NA	1.61288	1.55091	1.57149	1.57843	0.0315621	3	86.6204	0.000133252
SiJWF07BBX_pcr_1	-1.19623	-1.49166	-1.71162	-1.58764	-1.49679	0.219672	4	13.6275	0.000854813		SiJWA01ACC_pcr_2	1.61432	1.27041	1.78254	1.64649	1.57844	0.217915	4	14.4868	0.000713112
SiJWF09BCH_pcr_1	-1.47342	-1.51479	-1.49203	-1.49148	-1.49293	0.0169474	4	176.184	4.032e-07		SiJWF01ACS_pcr_2	1.67405	1.70086	1.48893	1.45611	1.57999	0.125291	4	25.2211	0.000136686
SiJWD11ABD_pcr_2	-1.71339	-1.29953	-1.46664	-1.48774	-1.49182	0.170019	4	17.5489	0.000403338		SiJWE02BCF_pcr_1	1.40255	1.66284	1.50034	1.76278	1.58213	0.161336	4	19.6129	0.000289599
SiJWD03BCW_pcr_1	-1.29786	-1.40007	-1.66331	-1.59956	-1.4902	0.170336	4	17.4971	0.000406898		SiJWB05ACS_pcr_1	1.72614	1.52708	1.61902	1.46076	1.58325	0.115261	4	27.4723	0.000105856
SiJWH07BDA_pcr_1	-1.57288	-1.36411	-1.38873	-1.62713	-1.48821	0.131358	4	22.6589	0.000188243		SiJWB06ADX_pcr_1	1.70941	1.7919	1.37504	1.46636	1.58567	0.197012	4	16.0972	0.000521456
SiJWH01AAU_pcr_2	-1.31234	-1.44737	-1.37631	-1.81042	-1.48661	0.222809	4	13.3443	0.000909651		SiJWD02ABI_pcr_2	1.56643	1.38212	1.79654	1.60102	1.58653	0.169808	4	18.6862	0.000334541
SiJWB06ABE_pcr_2	-1.38914	-1.37514	-1.58402	-1.59424	-1.48564	0.119719	4	24.8188	0.000143416		SiJWD10BBH_pcr_1	1.44937	1.45139	1.7695	1.68166	1.58798	0.162885	4	19.4982	0.000294708
SiJWH12ABP_pcr_2	-1.37804	-1.58794	-1.59718	-1.37799	-1.48529	0.123926	4	23.9706	0.000159118		SiJWH02ABG_pcr_2	1.79433	1.6476	1.50517	1.41727	1.59109	0.165424	4	19.2366	0.000306817
SiJWE07AAD_pcr_2	-1.25296	-1.54133	-1.48482	-1.63656	-1.47892	0.163131	4	18.1316	0.000365952		SiJWE02ADG_pcr_1	1.62145	1.63739	1.43084	1.67764	1.59183	0.109902	4	28.9682	9.03334e-05
SiJWH03BEA_pcr_2	-1.39175	-1.47886	-1.47538	-1.56568	-1.47792	0.0710257	4	41.6164	3.05335e-05		SiJWB05ADV_pcr_1	1.61188	1.81306	1.41209	1.53665	1.59342	0.168016	4	18.9675	0.000319972
SiJWC03ABC_pcr_2	-1.35432	-1.42838	-1.64317	-1.48245	-1.47708	0.122549	4	24.1059	0.000156464		SiJWF05BCQ_pcr_1	1.47718	1.58862	1.52532	1.79509	1.59655	0.140004	4	22.8073	0.000184608
SiJWG10ACR_pcr_2	-1.45887	-1.3366	-1.67868	-1.42806	-1.47555	0.145034	4	20.3476	0.000259518		SiJWE10AEA_pcr_1	1.64599	1.70598	1.50871	1.53129	1.59799	0.0937817	4	34.079	5.55477e-05
SiJWC05ADE_pcr_1	-1.24651	-1.42551	-1.66925	-1.5602	-1.47537	0.182254	4	16.1902	0.000512602		SiJWB11BAW_pcr_1	1.6729	1.47371	1.60724	1.63854	1.5981	0.0871508	4	36.6743	4.45887e-05
SiJWB10AAP_pcr_2	-1.29748	-1.29466	-1.76584	-1.53652	-1.47363	0.225389	4	13.0763	0.000965935		SiJWC09ABH_pcr_2	1.77711	1.80659	1.53538	1.29692	1.604	0.238059	4	13.4756	0.000883651
SiJWB08ABM_pcr_2	-1.31739	-1.29317	-1.72658	-1.54501	-1.47054	0.204954	4	14.3499	0.000733466		SiJWC09BDR_pcr_1	1.4003	1.47313	1.72178	1.83239	1.6069	0.203816	4	15.7682	0.000554466
SiJWB03BBL_pcr_1	-1.39127	-1.2672	-1.73635	-1.47969	-1.46863	0.198622	4	14.7882	0.00067085		SiJWB02BCW_pcr_1	1.66436	1.82732	1.52518	1.45028	1.61678	0.166035	4	19.4752	0.000295745
SiJWD11ABE_pcr_2	-1.32699	-1.42182	-1.53261	-1.5877	-1.46728	0.116212	4	25.2518	0.00013619		SiJWF04ABC_pcr_2	1.45109	1.55556	1.54863	1.95625	1.62788	0.224046	4	14.5317	0.000706589
SiJWD07ABP_pcr_2	-1.44037	-1.48193	-1.63126	-1.31309	-1.46666	0.13115	4	22.3662	0.000195694		SiJWH07BCZ_pcr_1	1.65238	1.40928	1.74836	1.71891	1.63223	0.15396	4	21.2033	0.000229505
SiJWC06ABX_pcr_2	-1.72223	-1.26648	-1.46701	-1.40754	-1.46581	0.190508	4	15.3884	0.00059611		SiJWC08BAH_pcr_2	1.61496	1.73196	1.75449	1.443	1.6361	0.142524	4	22.959	0.000180991
SiJWA10BCH_pcr_1	-1.26931	-1.53083	-1.45593	-1.59812	-1.46355	0.14192	4	20.6249	0.000249248		SiJWA06CAF_pcr_1	1.72994	1.43436	1.63369	1.74655	1.63613	0.143422	4	22.8157	0.000184405
SiJWE08BCK_pcr_1	-1.5629	-1.65366	-1.37042	-1.26434	-1.46283	0.177357	4	16.4959	0.000484875		SiJWE05BCZ_pcr_1	1.68362	1.52795	1.69779	1.64016	1.63738	0.0769648	4	42.5488	2.85724e-05
SiJWE09ABS_pcr_2	-1.66446	-1.35532	-1.53099	-1.29408	-1.46121	0.168649	4	17.3285	0.000418801		SiJWF04ACW_pcr_2	1.50714	1.80669	1.64635	1.60728	1.64187	0.124545	4	26.3658	0.000119702
SiJWH11BCP_pcr_1	-1.31903	-1.48826	-1.67101	-1.35292	-1.45781	0.159833	4	18.2416	0.000359422		SiJWE02AAV_pcr_2	1.55794	1.4941	1.82648	1.68997	1.64212	0.147507	4	22.2649	0.000198363
SiJWH09AAB_pcr_2	-1.38621	-1.37116	-1.4232	-1.64292	-1.45587	0.126603	4	22.9991	0.000180048		SiJWD08AAY_pcr_1	1.68457	1.63561	1.61191	1.64314	1.64381	0.0302604	4	108.644	1.71917e-06
SiJWA12AAD_pcr_2	-1.33651	-1.56192	-1.36233	-1.56185	-1.45565	0.12312	4	23.6461	0.000165731		SiJWG11CAJ_pcr_1	1.44067	1.42723	1.81278	1.91251	1.6483	0.250896	4	13.1393	0.000952299
SiJWA07ADD_pcr_1	-1.57995	-1.23816	-1.56586	-1.41534	-1.44983	0.159573	4	18.1714	0.000363572		SiJWA06CAW_pcr_1	1.45065	1.72347	1.57506	1.8698	1.65474	0.181636	4	18.2204	0.000360666
SiJWG03ABS_pcr_2	-1.30034	-1.4904	-1.5036	-1.50415	-1.44962	0.099723	4	29.073	8.93625e-05		SiJWB07AAJ_pcr_2	1.5447	1.48322	1.95429	1.65388	1.65902	0.209112	4	15.8673	0.000544236
SiJWD08AAP_pcr_2	-1.40693	-1.38252	-1.48587	-1.51954	-1.44872	0.0646133	4	44.8426	2.4413e-05		SiJWD12ADP_pcr_1	1.783	1.87596	1.61119	1.39362	1.66594	0.212103	4	15.7088	0.000560713
SiJWE11ABT_pcr_2	-1.31159	-1.24332	-1.51916	-1.71197	-1.44651	0.212318	4	13.6259	0.000855099		SiJWE10BDJ_pcr_1	1.54851	1.47739	1.7492	1.8916	1.66667	0.189028	4	17.6342	0.000397559
SiJWD03BDA_pcr_1	-1.2864	-1.39723	-1.62519	-1.47478	-1.4459	0.142349	4	20.3149	0.000260765		SiJWB12CAB_pcr_1	1.49817	1.92465	1.57058	1.69379	1.6718	0.186912	4	17.8886	0.000380958
SiJWD06BDB_pcr_1	-1.32754	-1.38079	-1.43793	-1.62102	-1.44182	0.127686	4	22.5839	0.000190116		SiJWH08ADG_pcr_1	1.75877	1.6826	1.60622	1.64454	1.67303	0.0651125	4	51.389	1.62282e-05
SiJWD04CAD_pcr_1	-1.56775	-1.55728	-1.31055	-1.31322	-1.4372	0.144768	4	19.8552	0.000279187		SiJWH03ACE_pcr_2	1.72786	1.66025	1.40785	1.8971	1.67326	0.203058	4	16.4807	0.000486204
SiJWB03BAB_pcr_1	-1.68307	-1.54873	-1.30625	-1.20373	-1.43545	0.219496	4	13.0794	0.000965246		SiJWC09BDJ_pcr_1	1.58431	1.69075	1.76992	1.65073	1.67393	0.0776038	4	43.1404	2.74144e-05
SiJWD07BBG_pcr_1	-1.32101	-1.33743	-1.57683	-1.48015	-1.42886	0.121813	4	23.4598	0.000169692		SiJWG11ACV_pcr_2	1.83246	1.82803	1.43563	1.60116	1.67432	0.19232	4	17.4118	0.000412864
SiJWF05BAA_pcr_2	-1.17993	-1.51666	-1.50055	-1.50802	-1.42629	0.164372	4	17.3544	0.000416944		SiJWB03ACS_pcr_2	1.59243	1.59193	1.98246	1.53407	1.67522	0.206647	4	16.2134	0.000510428
SiJWF04BCU_pcr_1	-1.21118	-1.40591	-1.55368	-1.52156	-1.42308	0.154866	4	18.3783	0.000351518		SiJWH03BBK_pcr_1	1.74123	1.93333	1.44576	1.58159	1.67548	0.210074	4	15.9513	0.000535764
SiJWE05ACB_pcr_2	-1.56865	-1.29073	-1.36898	-1.46238	-1.42268	0.119969	4	23.7176	0.000164243		SiJWG10BDW_pcr_2	1.57932	1.56791	1.77993	1.77575	1.67573	0.118017	4	28.3982	9.58661e-05
SiJWB02ADS_pcr_1	-1.53494	-1.39342	-1.31836	-1.43218	-1.41972	0.090178	4	31.4871	7.03876e-05		SiJWD05ADR_pcr_1	1.485	1.67733	1.63681	1.90544	1.67614	0.17384	4	19.2838	0.000304584
SiJWE03BAR_pcr_1	-1.25254	-1.48637	-1.39049	-1.54421	-1.4184	0.127456	4	22.2572	0.00019857		SiJWC08ABI_pcr_2	1.60377	1.76266	1.71793	1.64211	1.68162	0.0718961	4	46.7791	2.15081e-05
SiJWA02AAH_pcr_2	-1.27248	-1.2443	-1.57818	-1.57532	-1.41757	0.184168	4	15.3943	0.000595432		SiJWE05ADI_pcr_1	1.52465	1.67943	1.80402	1.72216	1.68256	0.117282	4	28.6927	9.29525e-05
SiJWH11BCW_pcr_1	-1.24692	-1.61671	-1.50378	-1.2962	-1.4159	0.1741	4	16.2654	0.000505587		SiJWC09CAW_pcr_1	1.58791	1.56659	1.84264	1.7333	1.68261	0.129884	4	25.9094	0.000126117
SiJWB12BDI_pcr_1	-1.28566	-1.44345	-1.61654	-1.31469	-1.41509	0.150798	4	18.768	0.000330214		SiJWB07BDP_pcr_1	1.85032	1.56467	1.73498	1.60432	1.68857	0.130083	4	25.9615	0.000125362
SiJWF11BAA_pcr_2	-1.24461	-1.31888	-1.55278	-1.53872	-1.41374	0.155517	4	18.1812	0.000362987		SiJWB06BBN_pcr_1	1.70884	1.7625	1.42781	1.86082	1.68999	0.185773	4	18.1942	0.000362216
SiJWH01CAW_pcr_1	-1.65712	-1.20784	-1.28235	-1.50669	-1.4135	0.206179	4	13.7114	0.000839402		SiJWG02BAJ_pcr_2	1.69088	1.46511	1.74565	1.86036	1.6905	0.166025	4	20.3644	0.000258879
SiJWH06BBG_pcr_1	-1.42976	-1.29256	-1.42652	-1.49234	-1.4103	0.0841306	4	33.5264	5.8334e-05		SiJWB05ACS_pcr_2	1.86047	1.81593	1.54795	1.54111	1.69136	0.170543	4	19.835	0.000280035
SiJWA09BDM_pcr_1	-1.22392	-1.49983	-1.64273	-1.25511	-1.4054	0.200635	4	14.0095	0.000787586		SiJWF12AAG_pcr_2	1.79636	1.85617	1.68954	1.44204	1.69603	0.182813	4	18.5548	0.000341651
SiJWE01AAY_pcr_2	-1.57931	-1.38218	-1.35036	-1.30646	-1.40458	0.12055	4	23.3028	0.000173131		SiJWH01ADS_pcr_1	1.69741	1.60191	1.76558	1.75583	1.70518	0.0751403	4	45.3866	2.35467e-05
SiJWG09BDX_pcr_1	-1.436	-1.17215	-1.58584	-1.42425	-1.40456	0.171513	4	16.3784	0.000495286		SiJWG10CAR_pcr_1	1.65179	1.74321	1.849	1.60011	1.71103	0.109367	4	31.2897	7.17254e-05
SiJWG11BDB_pcr_1	-1.50144	-1.46409	-1.3941	-1.2491	-1.40218	0.111334	4	25.1888	0.000137212		SiJWH07BBT_pcr_1	1.74475	1.59773	1.90976	1.60083	1.71327	0.147863	4	23.1737	0.000176027
SiJWE09CAC_pcr_1	-1.35056	-1.57133	-1.23836	-1.44606	-1.40158	0.141467	4	19.8149	0.000280886		SiJWF09CAO_pcr_1	1.78467	1.52582	1.70204	1.84369	1.71405	0.138286	4	24.79	0.000143915
SiJWD10BEA_pcr_1	-1.64784	-1.3854	-1.16818	-1.39605	-1.39937	0.19612	4	14.2705	0.00074564		SiJWF11AAA_pcr_2	1.53114	1.58666	1.94783	1.82543	1.72276	0.197012	4	17.4889	0.00040747
SiJWF11AAS_pcr_2	-1.21671	-1.39212	-1.48901	-1.49895	-1.3992	0.130854	4	21.3856	0.000223715		SiJWE01BEA_pcr_2	1.47871	1.57684	1.98364	1.86805	1.72681	0.238017	4	14.51	0.000709735
SiJWB10BDG_pcr_1	-1.36836	-1.43378	-1.26665	-1.52536	-1.39854	0.108981	4	25.6658	0.00012973		SiJWC12ADN_pcr_1	1.84463	1.67175	1.97603	1.4202	1.72815	0.240154	4	14.392	0.000727125
SiJWA04ABO_pcr_2	-1.29236	-1.5604	-1.28305	-1.45768	-1.39837	0.134545	4	20.7867	0.000243506		SiJWH07BBN_pcr_1	1.66054	2.02012	1.59484	1.64285	1.72959	0.195666	4	17.679	0.000394564
SiJWG07ADE_pcr_1	-1.45556	-1.24637	-1.40022	-1.48722	-1.39734	0.106881	4	26.1476	0.000122714		SiJWA02BBD_pcr_1	1.61993	1.50501	1.85308	1.94707	1.73127	0.204119	4	16.9633	0.000446201
SiJWG03BAF_pcr_1	-1.43706	-1.53776	-1.30622	-1.30249	-1.39588	0.113416	4	24.6153	0.000146987		SiJWF02ABD_pcr_2	1.78683	1.41362	1.93637	1.78928	1.73153	0.223171	4	15.5175	0.000581506
SiJWF01ABR_pcr_2	-1.20879	-1.64442	-1.27342	-1.45596	-1.39565	0.196115	4	14.2329	0.00075149		SiJWB08ACK_pcr_2	1.95403	1.78237	1.6852	1.5105	1.73302	0.185367	4	18.6983	0.000333897
SiJWC12BCV_pcr_1	-1.2246	-1.52292	-1.35488	-1.46633	-1.39218	0.131739	4	21.1354	0.000231712		SiJWD09ABG_pcr_2	1.82892	1.64934	1.71562	1.74866	1.73564	0.0746549	4	46.4976	2.19006e-05
SiJWC01ACM_pcr_2	-1.50128	-1.57305	-1.19987	-1.2863	-1.39012	0.17587	4	15.8086	0.000550265		SiJWE01BEA_pcr_1	1.43262	1.73813	1.86698	1.93152	1.74231	0.221563	4	15.7274	0.000558741
SiJWG06AEA_pcr_1	-1.42629	-1.46716	-1.40128	-1.2439	-1.38466	0.097687	4	28.3489	9.63655e-05		SiJWG04ABS_pcr_2	1.45396	1.88779	1.69932	1.9361	1.74429	0.21886	4	15.9398	0.000536913
SiJWC07BBE_pcr_1	-1.36489	-1.50945	-1.14226	-1.52049	-1.38427	0.176228	4	15.71	0.000560589		SiJWC05BDO_pcr_1	1.676	1.4379	1.90177	1.96779	1.74586	0.240335	4	14.5286	0.000707038
SiJWB08ABU_pcr_2	-1.11008	-1.39403	-1.55205	-1.46392	-1.38002	0.191223	4	14.4336	0.000720922		SiJWF08CAS_pcr_1	1.53258	1.63395	1.90776	1.91025	1.74614	0.192568	4	18.1353	0.000365735
SiJWB09ADN_pcr_1	-1.46168	-1.59453	-1.14134	-1.31309	-1.37766	0.195027	4	14.1279	0.00076818		SiJWB11BCJ_pcr_1	1.52291	1.78151	1.85233	1.87275	1.75738	0.161124	4	21.814	0.000210857
SiJWE04ABL_pcr_2	-1.42493	-1.49341	-1.33157	-1.24039	-1.37258	0.110296	4	24.8891	0.000142209		SiJWD01BDI_pcr_1	1.59374	1.59876	1.91953	1.93317	1.7613	0.190677	4	18.4741	0.000346111
SiJWD07ACA_pcr_2	-1.24773	-1.26806	-1.47942	-1.486	-1.3703	0.130087	4	21.0675	0.000233949		SiJWF02ACR_pcr_2	1.82956	1.84975	1.82521	1.5411	1.76141	0.147261	4	23.9222	0.000160083
SiJWA03BAT_pcr_1	-1.33749	-1.29491	-1.53698	-1.29766	-1.36676	0.115133	4	23.7423	0.000163734		SiJWD01BDP_pcr_1	1.76685	2.06258	1.66242	1.56007	1.76298	0.21684	4	16.2606	0.00050603
SiJWF10CAD_pcr_1	-1.16814	-1.36957	-1.41486	-1.51202	-1.36615	0.144762	4	18.8744	0.0003247		SiJWH09ABW_pcr_2	2.08016	1.8382	1.56845	1.57599	1.7657	0.244296	4	14.4555	0.000717701
SiJWA03ADO_pcr_1	-1.43449	-1.38525	-1.30597	-1.33686	-1.36564	0.0563147	4	48.5004	1.93006e-05		SiJWC11AAF_pcr_2	1.47012	1.66922	1.93127	1.99628	1.76672	0.243072	4	14.5366	0.000705885
SiJWF12BAZ_pcr_1	-1.1972	-1.37274	-1.35147	-1.53881	-1.36506	0.139775	4	19.5321	0.000293182		SiJWA10ABD_pcr_2	2.02951	1.54615	1.87749	1.62609	1.76981	0.223399	4	15.8444	0.000546574
SiJWG12BBF_pcr_1	-1.07444	-1.45885	-1.55645	-1.35885	-1.36215	0.208078	4	13.0927	0.00096236		SiJWB06ABV_pcr_2	1.60659	1.73589	1.96052	1.78242	1.77135	0.146413	4	24.1966	0.000154719
SiJWH12BAX_pcr_1	-1.0889	-1.35626	-1.53741	-1.45305	-1.35891	0.194622	4	13.9645	0.000795116		SiJWG01AAT_pcr_2	2.05968	1.80994	1.64694	1.57261	1.77229	0.215715	4	16.4318	0.000490516
SiJWF05AAV_pcr_2	-1.39012	-1.49772	-1.13383	-1.40838	-1.35751	0.156357	4	17.3642	0.00041624		SiJWB11ADJ_pcr_1	1.67378	1.90621	1.7396	1.80085	1.78011	0.0987917	4	36.0377	4.69892e-05
SiJWA05AAL_pcr_2	-1.16265	-1.31322	-1.36535	-1.5863	-1.35688	0.17544	4	15.4683	0.000587013		SiJWH08BDK_pcr_1	1.673	1.45168	2.00958	1.99897	1.78331	0.270712	4	13.1749	0.000944693
SiJWB06BAM_pcr_1	-1.34088	-1.54173	-1.28677	-1.25034	-1.35493	0.12997	4	20.8498	0.000241313		SiJWB05ABV_pcr_2	1.91944	2.09418	1.48306	1.66097	1.78941	0.270889	4	13.2114	0.000936996
SiJWG03ABN_pcr_2	-1.5764	-1.45144	-1.1866	-1.20123	-1.35392	0.191762	4	14.1208	0.000769314		SiJWB10ADN_pcr_1	1.84508	2.06826	1.64371	1.61448	1.79288	0.210269	4	17.0533	0.000439236
SiJWF08ABT_pcr_2	-1.2143	-1.34676	-1.42048	-1.42571	-1.35181	0.098505	4	27.4465	0.000106154		SiJWC09BDA_pcr_1	1.62146	1.98347	1.68284	1.88592	1.79342	0.169779	4	21.1266	0.000232002
SiJWD01BDB_pcr_1	-1.5653	-1.19955	-1.25595	-1.36776	-1.34714	0.161368	4	16.6965	0.00046775		SiJWC10BCH_pcr_1	1.70329	1.46324	1.96939	2.04656	1.79562	0.265936	4	13.5041	0.000878137
SiJWA12AAT_pcr_2	-1.23307	-1.40644	-1.17918	-1.56619	-1.34622	0.175804	4	15.315	0.000604632		SiJWE03BAB_pcr_1	2.14762	1.73863	1.67268	1.62658	1.79638	0.23863	4	15.0558	0.000636076
SiJWB05BDW_pcr_2	-1.49432	-1.31825	-1.3563	-1.19317	-1.34051	0.123977	4	21.6251	0.000216402		SiJWE11BBI_pcr_1	1.71427	1.81273	1.90276	1.78131	1.80277	0.0782936	4	46.0514	2.25426e-05
SiJWE11BBR_pcr_1	-1.08454	-1.34901	-1.45872	-1.46695	-1.33981	0.178469	4	15.0144	0.000641287		SiJWD05BDI_pcr_1	1.55493	1.62051	2.01451	2.03505	1.80625	0.25389	4	14.2286	0.000752163
SiJWH10ACI_pcr_2	-1.39621	-1.39046	-1.33365	-1.23709	-1.33935	0.0737892	4	36.3021	4.59717e-05		SiJWD10ABY_pcr_2	2.07593	1.89879	1.63476	1.61943	1.80723	0.220301	4	16.4069	0.000492737
SiJWA11ADX_pcr_1	-1.21258	-1.56083	-1.28703	-1.28408	-1.33613	0.153706	4	17.3855	0.000414725		SiJWD02BAA_pcr_2	1.46544	2.04406	1.78412	1.93892	1.80814	0.252178	4	14.3401	0.000734954
SiJWG12ADQ_pcr_1	-1.30284	-1.20582	-1.49173	-1.33546	-1.33396	0.118721	4	22.4723	0.000192949		SiJWA10BCS_pcr_1	2.06136	1.82547	1.76539	1.60101	1.81331	0.190651	4	19.0223	0.000317234
SiJWD11AAC_pcr_1	-1.27736	-1.16268	-1.49012	-1.40387	-1.33351	0.143541	4	18.5801	0.000340262		SiJWE10BBB_pcr_1	1.84559	1.98143	1.73943	1.72121	1.82191	0.119651	4	30.4539	7.77785e-05
SiJWA04AAI_pcr_2	-1.56702	-1.42797	-1.14598	-1.1928	-1.33345	0.198676	4	13.4233	0.000893887		SiJWG05ACP_pcr_2	1.62358	1.59301	2.05765	2.03833	1.82814	0.254288	4	14.3785	0.000729155
SiJWB04AAS_pcr_2	-1.22988	-1.14149	-1.48118	-1.47643	-1.33225	0.17305	4	15.3973	0.000595093		SiJWE08ADY_pcr_newprimers	1.73799	1.91511	1.7253	1.93625	1.82866	0.112478	4	32.5158	6.39306e-05
SiJWH02BDW_pcr_2	-1.18663	-1.57446	-1.33779	-1.21614	-1.32875	0.176382	4	15.0668	0.000634696		SiJWH03AAS_pcr_2	2.01264	1.93029	1.64752	1.72931	1.82994	0.170151	4	21.5096	0.00021989
SiJWF03BAT_pcr_1	-1.30848	-1.54453	-1.34673	-1.09135	-1.32277	0.185754	4	14.2422	0.000750041		SiJWG04AAS_pcr_2	1.74321	1.77243	1.95486	1.84957	1.83002	0.0945506	4	38.7098	3.79284e-05
SiJWC08BBQ_pcr_1	-1.23403	-1.21405	-1.34301	-1.49988	-1.32274	0.130987	4	20.1965	0.00026535		SiJWH01BDG_pcr_1	1.70084	1.69335	1.83786	2.10252	1.83364	0.191163	4	19.1841	0.000309324
SiJWE05ABP_pcr_2	-1.23068	-1.44631	-1.34669	-1.25995	-1.32091	0.0970337	4	27.2258	0.000108749		SiJWA04ABH_pcr_2	2.08757	1.99508	1.67298	1.57909	1.83368	0.245735	4	14.9241	0.000652881
SiJWD08AAU_pcr_2	-1.46031	-1.47505	-1.20615	-1.14196	-1.32087	0.171643	4	15.3909	0.000595827		SiJWA06BCZ_pcr_1	1.66862	1.67453	1.96254	2.06796	1.84341	0.203049	4	18.1573	0.000364412
SiJWC07BAP_pcr_1	-1.4743	-1.15193	-1.35202	-1.27989	-1.31453	0.134869	4	19.4934	0.000294922		SiJWE03AAL_pcr_2	1.46796	1.86932	1.9563	2.0928	1.8466	0.268658	4	13.7468	0.000833014
SiJWG07BAV_pcr_1	-1.3803	-1.389	-1.23323	-1.2519	-1.31361	0.0824636	4	31.8591	6.79567e-05		SiJWG05ABN_pcr_2	1.70074	1.78841	1.93717	1.96189	1.84705	0.124037	4	29.7823	8.31447e-05
SiJWE11BDN_pcr_1	-1.12145	-1.22549	-1.44794	-1.45643	-1.31283	0.166466	4	15.7729	0.000553967		SiJWF02BCC_pcr_1	1.81725	1.84128	1.90988	1.8303	1.84968	0.0413184	4	89.5328	3.07135e-06
SiJWA02BDU_pcr_1	-1.17113	-1.20968	-1.42717	-1.43911	-1.31177	0.141108	4	18.5924	0.000339591		SiJWH03ADL_pcr_1	2.12228	1.8562	1.77445	1.65966	1.85315	0.1967	4	18.8424	0.000326346
SiJWC03ADR_pcr_1	-1.19906	-1.36218	-1.46177	-1.19457	-1.3044	0.130718	4	19.9573	0.000274948		SiJWG04BDT_pcr_1	1.48437	2.10029	1.95343	1.88202	1.85503	0.263282	4	14.0915	0.000774063
SiJWE07BCS_pcr_1	-1.15508	-1.21507	-1.5724	-1.27383	-1.30409	0.185326	4	14.0735	0.000777002		SiJWG08CAP_pcr_1	2.20661	1.82689	1.70775	1.68053	1.85545	0.242585	4	15.2973	0.000606715
SiJWD11AAI_pcr_2	-1.20109	-1.21511	-1.47116	-1.32677	-1.30353	0.125101	4	20.8397	0.000241661		SiJWF05BAP_pcr_1	1.87812	1.86262	1.67054	2.01556	1.85671	0.141876	4	26.1737	0.000122349
SiJWC04BBN_pcr_1	-1.30835	-1.24071	-1.31676	-1.33862	-1.30111	0.0422384	4	61.6079	9.42216e-06		SiJWD02ADL_pcr_1	1.74404	1.75351	1.878	2.06356	1.85978	0.148936	4	24.9742	0.000140766
SiJWC03ACZ_pcr_1	-1.22123	-1.2282	-1.39975	-1.33734	-1.29663	0.0869099	4	29.8385	8.26777e-05		SiJWG12BDU_pcr_1	1.63699	1.78379	2.01396	2.014	1.86218	0.185241	4	20.1055	0.000268949
SiJWE07BBC_pcr_1	-1.2621	-1.31827	-1.39092	-1.20421	-1.29388	0.0797127	4	32.4635	6.42398e-05		SiJWD01BCS_pcr_1	1.71243	2.08993	1.94999	1.71242	1.86619	0.186521	4	20.0106	0.000272773
SiJWC12ABX_pcr_2	-1.31853	-1.14417	-1.39317	-1.3133	-1.29229	0.105273	4	24.5513	0.000148135		SiJWH08CAH_pcr_1	1.94519	1.89566	1.7946	1.83692	1.86809	0.0660222	4	56.5898	1.21554e-05
SiJWB08BBL_pcr_1	-1.12055	-1.16034	-1.50903	-1.37704	-1.29174	0.183544	4	14.0755	0.00077668		SiJWA11BDU_pcr_1	2.14377	1.98712	1.775	1.58486	1.87269	0.244244	4	15.3346	0.000602349
SiJWC04BBI_pcr_1	-1.05131	-1.32558	-1.48211	-1.28966	-1.28716	0.178053	4	14.4582	0.000717299		SiJWF05ADJ_pcr_1	1.82516	1.88952	1.90636	1.90048	1.88038	0.0374676	4	100.374	2.18e-06
SiJWH05BCZ_pcr_1	-1.41715	-1.2764	-1.35769	-1.08981	-1.28526	0.142501	4	18.0387	0.000371599		SiJWG03CAO_pcr_1	2.02734	2.05231	1.74215	1.70003	1.88046	0.185106	4	20.3176	0.000260663
SiJWB05ADX_pcr_1	-1.54296	-1.2887	-1.12383	-1.18038	-1.28397	0.185717	4	13.8271	0.000818757		SiJWB01ADG_pcr_1	1.83615	1.7323	1.99268	1.96838	1.88238	0.121412	4	31.008	7.36931e-05
SiJWH07BCA_pcr_1	-1.20161	-1.54283	-1.16201	-1.22292	-1.28234	0.175481	4	14.6151	0.000694689		SiJWE01BBL_pcr_1	1.58659	1.79277	2.22614	1.93471	1.88505	0.268581	4	14.0371	0.000782993
SiJWE07ACR_pcr_2	-1.188	-1.30725	-1.41257	-1.21999	-1.28195	0.10061	4	25.4836	0.000132521		SiJWG01BEA_pcr_1	2.08596	2.17067	1.67917	1.63203	1.89196	0.275774	4	13.7211	0.000837656
SiJWH09AAB_pcr_1	-1.12084	-1.37534	-1.3497	-1.27976	-1.28141	0.114415	4	22.3993	0.000194831		SiJWD04ADL_pcr_1	1.9946	1.81972	1.924	1.8332	1.89288	0.0821161	4	46.1026	2.24678e-05
SiJWE07BDW_pcr_2	-1.39467	-1.1039	-1.13771	-1.46379	-1.27502	0.180819	4	14.1027	0.000772247		SiJWE10ABD_pcr_2	1.71232	1.8891	2.10364	1.87861	1.89592	0.160421	4	23.6367	0.000165927
SiJWB08ACF_pcr_2	-1.10995	-1.12858	-1.48035	-1.36124	-1.27003	0.180912	4	14.0403	0.000782462		SiJWH09CAI_pcr_1	1.97797	2.07551	1.72655	1.80785	1.89697	0.15856	4	23.9274	0.000159978
SiJWE05ADN_pcr_1	-1.19413	-1.49779	-1.16822	-1.21848	-1.26965	0.153466	4	16.5464	0.000480483		SiJWG12ADJ_pcr_1	1.6807	1.92121	1.97612	2.04749	1.90638	0.15909	4	23.966	0.00015921
SiJWB08AAW_pcr_2	-1.32889	-1.09659	-1.42055	-1.2256	-1.26791	0.139235	4	18.2125	0.000361137		SiJWG11BAF_pcr_1	2.16626	1.8947	1.76872	1.79656	1.90656	0.18137	4	21.024	0.000235395
SiJWD11AAY_pcr_2	-1.42785	-1.43617	-1.10459	-1.10282	-1.26786	0.189577	4	13.3756	0.000903349		SiJWG09AAO_pcr_2	1.75553	1.95539	2.00021	1.9321	1.91081	0.107307	4	35.6138	4.86837e-05
SiJWE02ADO_pcr_1	-1.24465	-1.14663	-1.32119	-1.35555	-1.267	0.0926748	4	27.343	0.000107361		SiJWA11ABC_pcr_2	2.0695	2.06503	1.85777	1.66815	1.91511	0.191996	4	19.9495	0.000275272
SiJWE08BBK_pcr_1	-1.27499	-1.47496	-1.08714	-1.22811	-1.2663	0.160389	4	15.7903	0.000552155		SiJWD04ADQ_pcr_1	1.87285	1.7586	2.0254	2.00585	1.91567	0.124738	4	30.7152	7.58148e-05
SiJWF01BAL_pcr_1	-1.29303	-1.27103	-1.31746	-1.1776	-1.26478	0.0611392	4	41.3738	3.10728e-05		SiJWH07BBP_pcr_1	1.85834	1.96988	2.01862	1.84197	1.9222	0.0857995	4	44.8068	2.44715e-05
SiJWG10BDD_pcr_1	-1.06474	-1.2566	-1.46346	-1.26948	-1.26357	0.162861	4	15.5172	0.000581539		SiJWC08CAF_pcr_1	1.74412	1.99586	1.82856	2.13692	1.92636	0.175065	4	22.0074	0.000205375
SiJWA05BBT_pcr_1	-1.22382	-1.29781	-1.14073	-1.39121	-1.26339	0.106665	4	23.689	0.000164837		SiJWF04ADN_pcr_1	1.90082	2.07252	1.90141	1.83138	1.92653	0.102727	4	37.5078	4.16865e-05
SiHNH11w01me_pcr_1	-1.27376	-1.01459	-1.38476	-1.3794	-1.26313	0.173395	4	14.5693	0.000701192		SiJWH08ADJ_pcr_1	1.89929	2.06335	1.79937	1.94669	1.92718	0.109601	4	35.1671	5.05589e-05
SiJWG12BBG_pcr_1	-1.35459	-1.3205	-1.06724	-1.29449	-1.2592	0.130322	4	19.3246	0.000302671		SiJWE11ACP_pcr_2	1.96087	1.96881	1.88253	1.95959	1.94295	0.0404866	4	95.9797	2.49323e-06
SiJWG01BCS_pcr_1	-1.2255	-1.42779	-1.05199	-1.33134	-1.25915	0.160936	4	15.6479	0.000567224		SiJWD03BDR_pcr_1	1.89296	2.03261	2.25757	1.59782	1.94524	0.276057	4	14.093	0.000773819
SiJWC11ADJ_pcr_1	-1.16033	-1.21466	-1.30588	-1.35383	-1.25867	0.0873538	4	28.8178	9.17502e-05		SiJWF06AAO_pcr_2	1.96389	1.82072	2.10422	1.93394	1.95569	0.116647	4	33.5318	5.83056e-05
SiJWE05ABQ_pcr_2	-1.08081	-1.31902	-1.27796	-1.33203	-1.25245	0.116724	4	21.4601	0.000221406		SiJWD07CAJ_pcr_1	2.33004	1.92387	1.75967	1.8148	1.9571	0.257821	4	15.1818	0.00062052
SiJWA10BAL_pcr_1	-1.00874	-1.22562	-1.38805	-1.38195	-1.25109	0.178202	4	14.0413	0.000782309		SiJWF09AAT_pcr_2	1.92456	1.89339	2.19222	1.82737	1.95939	0.160422	4	24.4278	0.000150384
SiJWC10ADP_pcr_1	-1.3968	-1.25954	-1.12121	-1.21833	-1.24897	0.11435	4	21.8446	0.000209976		SiJWH08ABH_pcr_2	1.6801	1.74377	2.2204	2.19621	1.96012	0.287926	4	13.6154	0.000857048
SiJWD05AAT_pcr_2	-1.37127	-1.10473	-1.11624	-1.39333	-1.24639	0.157262	4	15.8512	0.000545884		SiJWA09AAU_pcr_2	1.99817	1.66575	2.25977	1.92316	1.96171	0.244436	4	16.0509	0.00052594
SiJWF11BBS_pcr_1	-1.23135	-1.25761	-1.36216	-1.12259	-1.24343	0.0983978	4	25.2735	0.000135842		SiJWB05ACZ_pcr_1	1.94871	1.83625	2.07146	2.02394	1.97009	0.102545	4	38.4238	3.87804e-05
SiJWH04ACK_pcr_2	-1.36259	-1.22134	-1.21154	-1.17583	-1.24282	0.0822031	4	30.2379	7.94527e-05		SiJWA11BDY_pcr_1	2.00837	1.67216	2.30481	1.9495	1.98371	0.259453	4	15.2915	0.000607402
SiJWC12BBO_pcr_1	-1.22204	-1.46102	-1.20724	-1.06186	-1.23804	0.165293	4	14.9799	0.000645683		SiJWC04BDR_pcr_1	1.71047	1.95429	2.26084	2.02218	1.98694	0.226394	4	17.553	0.000403059
SiJWC07BBK_pcr_1	-1.29518	-1.43155	-1.0004	-1.21825	-1.23635	0.180336	4	13.7116	0.000839368		SiJWE01AAF_pcr_2	1.79786	1.68183	2.21418	2.29507	1.99724	0.302768	4	13.1932	0.000940832
SiJWE08BCH_pcr_1	-1.02196	-1.37748	-1.22602	-1.31869	-1.23604	0.155742	4	15.8729	0.000543667		SiJWD08ADM_pcr_1	1.72306	2.15086	2.02851	2.11857	2.00525	0.195118	4	20.5543	0.000251811
SiJWB06ABR_pcr_2	-1.07471	-1.32903	-1.33828	-1.19915	-1.2353	0.124481	4	19.8472	0.000279525		SiJWG09AAR_pcr_2	2.35697	1.89097	2.06624	1.72562	2.00995	0.269934	4	14.8922	0.000657041
SiJWG03BDK_pcr_1	-1.10469	-1.13757	-1.33685	-1.35983	-1.23474	0.132199	4	18.68	0.00033487		SiJWC01ABW_pcr_2	2.13983	2.03175	1.99615	1.89261	2.01508	0.101977	4	39.5203	3.56458e-05
SiJWE02BCD_pcr_1	-1.16841	-1.01705	-1.40582	-1.34661	-1.23447	0.176608	4	13.9798	0.000792551		SiJWB02BDI_pcr_1	1.86955	2.15738	1.9705	2.0801	2.01938	0.125923	4	32.0732	6.6608e-05
SiJWH06BBO_pcr_1	-1.25872	-1.30317	-1.27005	-1.09803	-1.23249	0.0916045	4	26.909	0.000112622		SiJWE12ADB_pcr_1	1.86688	2.19049	1.88638	2.13567	2.01985	0.167079	4	24.1784	0.000155067
SiJWA09BBF_pcr_1	-1.20715	-1.32762	-1.1707	-1.2217	-1.23179	0.067389	4	36.5576	4.50161e-05		SiJWH12BCC_pcr_1	1.9202	2.00667	2.10492	2.0548	2.02165	0.0786333	4	51.4196	1.61992e-05
SiJWF04BBB_pcr_1	-1.23876	-1.09884	-1.28852	-1.28995	-1.22902	0.0899889	4	27.3149	0.000107692		SiJWF12ACO_pcr_2	2.13367	2.15968	1.88259	1.91792	2.02346	0.143393	4	28.2226	9.7661e-05
SiJWA01BDS_pcr_1	-1.39512	-0.964765	-1.30076	-1.23494	-1.2239	0.184841	4	13.2427	0.000930457		SiJWG08CAC_pcr_1	2.04115	1.94551	2.15988	1.96262	2.02729	0.0977113	4	41.4955	3.08007e-05
SiJWF01ADD_pcr_1	-1.27407	-1.29868	-1.24077	-1.07707	-1.22265	0.0999094	4	24.4751	0.000149518		SiJWA01BCY_pcr_1	1.7337	1.87304	2.23842	2.27381	2.02974	0.267904	4	15.1528	0.000624057
SiJWB12CAR_pcr_1	-1.05445	-1.28862	-1.33545	-1.1939	-1.2181	0.123975	4	19.6507	0.00028794		SiJWG06CAP_pcr_1	2.29038	1.91108	2.04169	1.91455	2.03943	0.178	4	22.9148	0.000182033
SiJWB07ACU_pcr_2	-0.99689	-1.14597	-1.35118	-1.37675	-1.2177	0.179832	4	13.5427	0.000870761		SiJWG04BDJ_pcr_1	2.01909	1.69792	2.15087	2.29155	2.03986	0.253657	4	16.0836	0.000522769
SiJWB10BAR_pcr_1	-1.38518	-1.21658	-1.01524	-1.2401	-1.21427	0.152201	4	15.9562	0.000535274		SiJWG03CAF_pcr_1	2.07378	2.35811	1.88703	1.86536	2.04607	0.2281	4	17.9401	0.000377709
SiJWF03BBQ_pcr_1	-1.3656	-1.27751	-1.22634	-0.987492	-1.21423	0.161734	4	15.0152	0.000641185		SiJWE03ABT_pcr_2	1.75878	2.01325	2.16488	2.26249	2.04985	0.219472	4	18.6798	0.000334881
SiJWH06BAQ_pcr_1	-1.25895	-1.15704	-1.0336	-1.39686	-1.21161	0.154084	4	15.7266	0.00055883		SiJWB02AAE_pcr_2	2.00216	2.01061	2.08467	2.12303	2.05512	0.0585116	4	70.2465	6.35741e-06
SiJWH12BCP_pcr_1	-1.30937	-1.1772	-1.21138	-1.14182	-1.20994	0.0721114	4	33.5576	5.81717e-05		SiJWA03ADA_pcr_1	2.01669	2.34695	1.97175	1.90245	2.05946	0.197335	4	20.8728	0.000240521
SiJWD01ABN_pcr_2	-1.06728	-1.08099	-1.39317	-1.29813	-1.20989	0.161589	4	14.975	0.000646312		SiJWE04BAH_pcr_2	1.82262	2.19297	1.89317	2.32927	2.05951	0.241086	4	17.0852	0.000436794
SiJWC11AAY_pcr_1	-1.24826	-1.15016	-1.04839	-1.39086	-1.20942	0.145911	4	16.5774	0.000477813		SiJWA02BDF_pcr_1	2.25223	2.30284	2.06375	1.71211	2.08273	0.267643	4	15.5635	0.000576413
SiJWD07ACJ_pcr_2	-1.38132	-1.27686	-1.01324	-1.153	-1.20611	0.158878	4	15.1828	0.000620407		SiJWH10AAJ_pcr_2	2.14037	1.89143	2.03122	2.27869	2.08543	0.164258	4	25.3921	0.000133954
SiJWF05BDW_pcr_2	-1.2817	-1.40608	-1.0171	-1.10254	-1.20185	0.175199	4	13.7199	0.000837871		SiJWF02BAB_pcr_1	2.29346	2.08214	2.02319	1.95784	2.08916	0.145356	4	28.7453	9.24444e-05
SiJWB07BDL_pcr_1	-1.16707	-1.35832	-1.0907	-1.17958	-1.19892	0.113298	4	21.1639	0.000230782		SiJWG02AAN_pcr_2	2.28121	2.37159	1.93163	1.80901	2.09836	0.270563	4	15.5111	0.000582219
SiJWG10ABH_pcr_2	-1.37618	-1.10071	-1.17477	-1.1433	-1.19874	0.122126	4	19.6312	0.000288792		SiJWC09ADF_pcr_1	2.17683	2.16192	2.04167	2.02689	2.10183	0.0784651	4	53.5735	1.43244e-05
SiJWE05BBD_pcr_1	-1.21858	-1.11982	-1.2958	-1.15885	-1.19826	0.0766666	4	31.259	7.19361e-05		SiJWA11BCH_pcr_1	1.86407	2.3544	2.30326	1.88856	2.10257	0.262283	4	16.0329	0.0005277
SiJWH07ABV_pcr_2	-1.1521	-1.11063	-1.15671	-1.37226	-1.19793	0.118053	4	20.2947	0.00026154		SiJWB11AAZ_pcr_1	1.92709	1.92771	2.33451	2.22272	2.10301	0.207843	4	20.2364	0.000263793
SiJWA03BAY_pcr_1	-1.09703	-1.06761	-1.35231	-1.26612	-1.19577	0.136175	4	17.5622	0.000402428		SiJWG01BEA_pcr_2	2.45658	2.27762	1.81964	1.88443	2.10957	0.307356	4	13.7272	0.000836547
SiJWD11AAM_pcr_2	-1.00989	-1.14225	-1.27528	-1.35436	-1.19545	0.151536	4	15.7777	0.000553466		SiJWB07BCQ_pcr_1	2.31659	2.1209	1.95801	2.05225	2.11194	0.151896	4	27.8076	0.000102085
SiJWA05CAS_pcr_1	-1.36168	-1.2016	-1.2185	-0.997068	-1.19471	0.150062	4	15.9229	0.00053861		SiJWB02AAJ_pcr_2	1.91562	1.87658	2.41471	2.26005	2.11674	0.262962	4	16.0992	0.000521265
SiJWC06BAN_pcr_1	-1.08971	-1.32367	-1.15733	-1.20059	-1.19282	0.0984428	4	24.2338	0.00015401		SiJWE11BCS_pcr_1	2.22482	1.93197	2.19733	2.11972	2.11846	0.132052	4	32.0852	6.65333e-05
SiJWF12CAP_pcr_1	-1.27182	-1.09726	-1.26346	-1.13637	-1.19223	0.088597	4	26.9135	0.000112566		SiJWH03AAB_pcr_2	2.03511	2.2948	2.00293	2.14155	2.1186	0.13156	4	32.2072	6.57816e-05
SiJWE12BAK_pcr_2	-1.19791	-1.18851	-1.13675	-1.23138	-1.18864	0.039178	4	60.679	9.86125e-06		SiJWF11BDP_pcr_1	1.88095	2.12594	2.2557	2.24158	2.12604	0.173425	4	24.5183	0.000148732
SiJWF12ABC_pcr_2	-1.14083	-1.34144	-1.09348	-1.17655	-1.18808	0.107757	4	22.051	0.000204164		SiJWE10BCN_pcr_1	1.84053	2.06364	2.29047	2.31139	2.12651	0.221211	4	19.2261	0.000307317
SiJWG09BBM_pcr_1	-1.37471	-1.17889	-1.01062	-1.18069	-1.18623	0.148827	4	15.9411	0.000536784		SiJWH01ACP_pcr_2	1.82757	1.9242	2.24738	2.5234	2.13064	0.317467	4	13.4228	0.000893995
SiJWG04ADP_pcr_1	-1.24862	-1.27685	-1.09377	-1.1195	-1.18469	0.0914641	4	25.9049	0.000126182		SiJWF07BAR_pcr_1	1.97511	1.78846	2.40954	2.36226	2.13384	0.301476	4	14.156	0.000763667
SiJWE11ADY_pcr_newprimers	-1.04015	-1.05882	-1.35206	-1.28511	-1.18403	0.157935	4	14.9939	0.000643897		SiJWE11CAM_pcr_1	2.0005	2.46238	2.01163	2.06675	2.13532	0.219961	4	19.4154	0.000298468
SiJWC11AAY_pcr_2	-1.15067	-1.13797	-1.26805	-1.17678	-1.18337	0.0587176	4	40.3071	3.36019e-05		SiJWH01BDI_pcr_1	1.91374	2.59335	2.072	1.97636	2.13886	0.309903	4	13.8035	0.000822928
SiJWE01ADT_pcr_1	-1.26565	-1.2364	-1.09008	-1.13411	-1.18156	0.0830638	4	28.4495	9.53499e-05		SiJWH01ACO_pcr_2	1.88271	2.08855	2.28314	2.3361	2.14762	0.2062	4	20.8305	0.000241981
SiJWB06ABQ_pcr_2	-1.27225	-1.22022	-1.02405	-1.19155	-1.17702	0.10731	4	21.9368	0.000207353		SiJWB08ACA_pcr_2	2.05129	1.91221	2.1418	2.50556	2.15271	0.253475	4	16.9856	0.000444464
SiJWG03BBC_pcr_1	-1.11638	-1.14979	-1.33063	-1.1077	-1.17613	0.104587	4	22.491	0.000192471		SiJWF01BBX_pcr_1	1.85595	1.91576	2.36737	2.47871	2.15445	0.314409	4	13.7047	0.000840611
SiJWD09CAD_pcr_1	-1.01304	-1.17399	-1.09004	-1.42443	-1.17538	0.178571	4	13.1643	0.00094696		SiJWA04BAJ_pcr_2	2.20562	2.32435	1.96492	2.12751	2.1556	0.150696	4	28.6086	9.37718e-05
SiJWA07AAX_pcr_1	-0.999453	-1.11984	-1.30566	-1.27462	-1.1749	0.142428	4	16.4981	0.000484677		SiJWD08CAU_pcr_1	1.88987	2.05663	2.57978	2.11859	2.16122	0.295285	4	14.6382	0.000691453
SiJWG03BBE_pcr_1	-1.08587	-1.19184	-1.2285	-1.19172	-1.17448	0.0615603	4	38.1571	3.95977e-05		SiJWB06AAK_pcr_2	2.49584	2.30919	1.98928	1.90899	2.17583	0.27459	4	15.8478	0.000546224
SiJWF02ABQ_pcr_2	-1.12632	-1.12013	-1.16057	-1.27826	-1.17132	0.0734774	4	31.8824	6.78081e-05		SiJWG12BCH_pcr_1	2.2002	1.82144	2.53682	2.16046	2.17973	0.292506	4	14.9039	0.000655512
SiJWB03ACT_pcr_2	-1.09547	-1.08224	-1.21725	-1.28972	-1.17117	0.0996948	4	23.4951	0.000168932		SiJWF11ADH_pcr_1	2.41052	2.35841	2.12302	1.84098	2.18323	0.260199	4	16.7813	0.000460758
SiJWC10AAN_pcr_2	-1.31602	-1.25442	-1.07416	-1.03929	-1.17097	0.135052	4	17.341	0.000417898		SiJWH08AAO_pcr_2	2.46154	2.24128	2.12414	1.95092	2.19447	0.214306	4	20.4798	0.000254555
SiJWH06CAO_pcr_1	-1.28105	-1.11984	-1.11768	-1.15866	-1.16931	0.0768388	4	30.4354	7.79202e-05		SiJWG07ACY_pcr_1	2.20623	2.01998	2.18569	2.37433	2.19656	0.144909	4	30.3164	7.8839e-05
SiJWE10AAX_pcr_1	-0.948594	-1.38177	-1.16123	-1.18482	-1.1691	0.177162	4	13.1981	0.000939787		SiJWB10BAN_pcr_1	2.30403	2.02913	2.24693	2.21346	2.19839	0.118872	4	36.9875	4.34676e-05
SiJWG04BAA_pcr_2	-1.02192	-1.37841	-1.16832	-1.09328	-1.16548	0.154024	4	15.1338	0.000626386		SiJWA09CAE_pcr_1	2.27313	1.88522	2.32358	2.34599	2.20698	0.216662	4	20.3726	0.00025857
SiJWF03BBI_pcr_1	-1.10236	-1.23908	-1.26138	-1.04804	-1.16271	0.103859	4	22.3902	0.000195067		SiJWE01ADH_pcr_1	2.13036	2.38317	2.05969	2.25909	2.20808	0.142963	4	30.8903	7.45366e-05
SiJWE03ABW_pcr_2	-1.01684	-1.1208	-1.17667	-1.31642	-1.15768	0.124838	4	18.547	0.000342076		SiJWC03AAW_pcr_2	2.30032	2.27671	2.19508	2.07131	2.21085	0.103377	4	42.7724	2.81271e-05
SiJWH05ACP_pcr_2	-1.10327	-1.38425	-1.03699	-1.10276	-1.15682	0.154785	4	14.9474	0.000649865		SiJWB03ACR_pcr_2	2.3788	2.28484	2.20927	1.97866	2.21289	0.170861	4	25.9029	0.000126212
SiJWC11BAS_pcr_1	-1.03129	-1.12205	-1.31582	-1.15125	-1.1551	0.118699	4	19.4628	0.000296307		SiJWC01BCE_pcr_1	2.03434	2.56461	2.05826	2.20238	2.2149	0.244668	4	18.1054	0.000367536
SiJWF08BDR_pcr_1	-1.00813	-1.18739	-1.04743	-1.36685	-1.15245	0.162323	4	14.1994	0.000756761		SiJWE06BCI_pcr_1	2.24385	2.60815	2.03578	1.97254	2.21508	0.286535	4	15.4612	0.000587816
SiJWE04BCG_pcr_1	-1.15816	-1.19232	-1.09056	-1.1631	-1.15104	0.0430398	4	53.487	1.43939e-05		SiJWD04CAK_pcr_1	1.87794	2.09713	2.33489	2.56159	2.21789	0.295506	4	15.0108	0.000641753
SiJWH09BBD_pcr_1	-0.99421	-1.05928	-1.22488	-1.32441	-1.15069	0.151134	4	15.2275	0.000615015		SiJWC04BCE_pcr_1	2.44413	1.81963	2.16263	2.44773	2.21853	0.297586	4	14.9102	0.000654684
SiJWE10BDT_pcr_1	-1.11077	-1.08349	-1.37144	-1.02878	-1.14862	0.152407	4	15.073	0.000633917		SiJWE08ADY_pcr_1	2.52137	2.45843	1.87991	2.03598	2.22392	0.314714	4	14.133	0.000767356
SiJWD02ADZ_pcr_1	-1.32261	-1.06551	-1.17524	-1.02307	-1.14661	0.133707	4	17.1511	0.000431821		SiJWG09AAZ_pcr_1	2.03379	2.47003	2.15519	2.26455	2.23089	0.185202	4	24.0914	0.000156747
SiJWE06AAX_pcr_2	-1.25537	-0.983147	-1.32096	-1.02072	-1.14505	0.168113	4	13.6224	0.00085576		SiJWD04BAD_pcr_1	2.34017	2.45999	2.09572	2.05528	2.23779	0.19438	4	23.0249	0.000179446
SiJWB01BAR_pcr_1	-0.953136	-1.15198	-1.3134	-1.16056	-1.14477	0.147715	4	15.4996	0.000583495		SiJWE11ADF_pcr_1	2.34512	2.53727	2.0896	1.98815	2.24003	0.248643	4	18.018	0.000372866
SiJWH03BCO_pcr_1	-0.996095	-1.0077	-1.27532	-1.29667	-1.14395	0.164323	4	13.9232	0.000802134		SiJWB10ACA_pcr_2	2.05217	2.12569	2.31725	2.47162	2.24168	0.189694	4	23.6347	0.00016597
SiJWE12BCB_pcr_1	-1.30073	-1.22411	-0.980734	-1.06727	-1.14321	0.145515	4	15.7126	0.000560308		SiJWA07ADX_pcr_1	1.95287	2.28572	2.40459	2.3779	2.25527	0.20793	4	21.6926	0.0002144
SiJWH07BBC_pcr_1	-1.22789	-1.20549	-1.1122	-1.01158	-1.13929	0.0987842	4	23.0662	0.00017849		SiJWH07ADP_pcr_1	2.26895	2.20736	2.31675	2.23306	2.25653	0.0474332	4	95.1457	2.55935e-06
SiJWC06ADY_pcr_newprimers	-1.22164	-1.13867	-1.04946	-1.14329	-1.13827	0.0703882	4	32.3425	6.49615e-05		SiJWC06BCC_pcr_1	2.15049	1.91697	2.45617	2.54991	2.26839	0.289776	4	15.6562	0.000566335
SiJWE07BCM_pcr_1	-1.18023	-1.26493	-1.09305	-1.01435	-1.13814	0.108329	4	21.0127	0.000235773		SiJWC11AAP_pcr_2	2.07087	2.12734	2.38521	2.51857	2.2755	0.212087	4	21.4582	0.000221466
SiJWE06ADA_pcr_1	-1.16181	-1.23195	-1.051	-1.10456	-1.13733	0.0776302	4	29.3012	8.72965e-05		SiJWE12ADF_pcr_1	2.13161	2.29241	2.44341	2.23957	2.27675	0.129704	4	35.1068	5.08196e-05
SiJWA03CAE_pcr_1	-0.945387	-1.32079	-1.10263	-1.16627	-1.13377	0.155445	4	14.5874	0.000698615		SiJWA08BBA_pcr_1	2.65323	1.90482	2.23618	2.33723	2.28286	0.308342	4	14.8074	0.000668272
SiJWF01ABE_pcr_2	-0.94503	-1.05871	-1.26997	-1.25986	-1.13339	0.158855	4	14.2695	0.000745796		SiJWH03AAB_pcr_1	1.8472	2.60024	2.22598	2.46514	2.28464	0.330137	4	13.8405	0.000816412
SiJWH07ABB_pcr_2	-1.0917	-1.35954	-1.0645	-1.00772	-1.13087	0.156414	4	14.46	0.000717038		SiJWG03BCE_pcr_1	2.45282	2.67486	1.97226	2.04354	2.28587	0.334795	4	13.6553	0.000849653
SiJWH11ADT_pcr_1	-1.11409	-1.0028	-1.04648	-1.35492	-1.12957	0.157053	4	14.3846	0.000728232		SiJWA11BAZ_pcr_1	2.52158	2.02238	2.3988	2.20182	2.28614	0.219701	4	20.8114	0.000242644
SiJWF12BAH_pcr_2	-1.16854	-1.10389	-1.14044	-1.10336	-1.12906	0.0315304	4	71.6172	5.9995e-06		SiJWG12ACV_pcr_2	1.97099	2.13089	2.5816	2.52167	2.30128	0.297364	4	15.4779	0.000585933
SiJWC03BBD_pcr_1	-0.938565	-1.13872	-1.17551	-1.26084	-1.12841	0.136509	4	16.5324	0.000481697		SiJWC03BDL_pcr_1	1.90006	2.58524	2.13584	2.59133	2.30312	0.343072	4	13.4264	0.000893268
SiJWD08ADE_pcr_1	-1.18972	-1.18918	-0.983824	-1.14308	-1.12645	0.097566	4	23.0911	0.000177916		SiJWE06AAW_pcr_2	1.99071	2.07248	2.56917	2.65319	2.32138	0.33803	4	13.7348	0.000835176
SiJWC09ADN_pcr_1	-1.08204	-1.18045	-1.22371	-1.01205	-1.12456	0.0956015	4	23.526	0.000168271		SiJWG12BDI_pcr_1	2.23352	2.07371	2.39725	2.58966	2.32354	0.221186	4	21.0097	0.000235873
SiJWA10BAM_pcr_1	-0.968398	-1.00459	-1.25796	-1.25224	-1.12079	0.155798	4	14.3878	0.000727753		SiJWA03BAE_pcr_1	1.92992	2.36092	2.7736	2.2386	2.32576	0.349324	4	13.3158	0.000915424
SiJWD04AAU_pcr_2	-0.959527	-1.11034	-1.16544	-1.23986	-1.11879	0.118703	4	18.8503	0.000325939		SiJWE07ADC_pcr_1	2.08062	2.5417	2.06509	2.62602	2.32836	0.297097	4	15.674	0.000564418
SiJWG11BAJ_pcr_2	-1.19662	-1.16295	-1.02833	-1.08424	-1.11803	0.0761194	4	29.3758	8.66347e-05		SiJWD08CAL_pcr_1	1.95338	2.24699	2.57809	2.53757	2.32901	0.290613	4	16.0282	0.000528154
SiJWH09BAG_pcr_2	-1.00854	-0.950409	-1.27326	-1.23698	-1.1173	0.161584	4	13.8293	0.000818382		SiJWH06BDJ_pcr_1	2.40742	2.23726	2.21805	2.45891	2.33041	0.120757	4	38.5967	3.82624e-05
SiJWF06ABK_pcr_2	-1.1136	-1.16263	-1.12609	-1.06684	-1.11729	0.0395485	4	56.5023	1.22119e-05		SiJWD04AAA_pcr_1	2.66711	2.04666	2.21793	2.43883	2.34263	0.269375	4	17.3931	0.000414185
SiJWG10BCN_pcr_1	-1.01325	-0.95843	-1.33255	-1.16443	-1.11717	0.167948	4	13.3037	0.000917891		SiJWC08CAE_pcr_1	2.67358	1.94146	2.47424	2.44237	2.38291	0.311577	4	15.2958	0.000606893
SiJWA02CAJ_pcr_1	-1.06373	-0.925232	-1.27991	-1.19731	-1.11654	0.155563	4	14.3549	0.000732718		SiJWF08CAC_pcr_1	2.00982	2.64193	2.43506	2.45949	2.38657	0.267594	4	17.8373	0.000384231
SiJWB11CAR_pcr_1	-1.07303	-1.0618	-1.25349	-1.07493	-1.11581	0.0919662	4	24.2657	0.000153406		SiJWB05BDN_pcr_1	2.4239	2.24157	2.41172	2.48647	2.39092	0.10481	4	45.624	2.31814e-05
SiJWG07ADK_pcr_1	-1.24597	-1.12883	-1.11406	-0.963616	-1.11312	0.115828	4	19.2203	0.000307593		SiJWB02ABP_pcr_2	2.19147	2.00226	2.63056	2.74674	2.39276	0.353487	4	13.538	0.000871643
SiJWG01ACQ_pcr_2	-1.21194	-1.26499	-1.08332	-0.885576	-1.11146	0.168804	4	13.1686	0.000946039		SiJWA10AAP_pcr_2	2.11099	2.48607	2.43878	2.54601	2.39546	0.194657	4	24.6121	0.000147045
SiJWE07ABV_pcr_2	-1.17485	-1.30798	-1.00826	-0.942133	-1.10831	0.165249	4	13.4138	0.000895762		SiJWH01BAU_pcr_1	2.56612	2.36441	2.29474	2.36636	2.39791	0.116983	4	40.9958	3.19392e-05
SiJWE03BAI_pcr_2	-1.10711	-1.27458	-1.10854	-0.941554	-1.10795	0.13596	4	16.2982	0.000502575		SiJWC09AAN_pcr_2	2.09314	2.17755	2.80895	2.51842	2.39952	0.329097	4	14.5824	0.000699323
SiJWE03AAA_pcr_1	-1.04883	-1.04259	-1.09597	-1.23569	-1.10577	0.0898327	4	24.6184	0.000146932		SiJWE01AAI_pcr_2	2.57092	2.4824	2.26902	2.313	2.40883	0.14191	4	33.9488	5.61878e-05
SiJWG05AAI_pcr_2	-1.14331	-1.2321	-0.912892	-1.12882	-1.10428	0.135516	4	16.2975	0.000502637		SiJWB11BEA_pcr_1	2.29325	2.50638	2.49325	2.45988	2.43819	0.0985921	4	49.4602	1.81998e-05
SiJWA11ACJ_pcr_2	-1.05324	-1.09244	-1.11393	-1.15732	-1.10423	0.0434046	4	50.8809	1.67187e-05		SiJWD02AAA_pcr_2	2.59409	2.55337	2.29355	2.31545	2.43912	0.156583	4	31.1543	7.26619e-05
SiJWC12ACZ_pcr_1	-1.11293	-1.26162	-1.06993	-0.96616	-1.10266	0.122577	4	17.9913	0.00037452		SiJWC09BAC_pcr_1	2.19928	2.17795	2.74139	2.64353	2.44054	0.293757	4	16.616	0.00047452
SiJWC04BAT_pcr_1	-0.948438	-1.0868	-1.10238	-1.25687	-1.09862	0.126165	4	17.4157	0.000412591		SiJWC10BBY_pcr_1	2.01164	2.3222	2.78349	2.66446	2.44545	0.349106	4	14.0098	0.000787535
SiJWE07ABR_pcr_2	-0.989404	-1.2811	-0.927461	-1.18558	-1.09589	0.165383	4	13.2527	0.000928378		SiJWC10BAW_pcr_1	2.68885	2.57943	2.43963	2.1157	2.4559	0.248682	4	19.7514	0.000283587
SiJWG02AAP_pcr_2	-1.01401	-1.16662	-1.10941	-1.08358	-1.09341	0.0632903	4	34.5521	5.33015e-05		SiJWE01BDN_pcr_1	2.11764	2.48523	2.55497	2.70409	2.46548	0.249219	4	19.7856	0.000282125
SiJWF05BCR_pcr_1	-1.14481	-1.2617	-0.925298	-1.03775	-1.09239	0.144128	4	15.1586	0.000623351		SiJWB01ADD_pcr_1	2.01247	2.36192	2.72399	2.76684	2.46631	0.352888	4	13.9779	0.000792873
SiJWA09ABT_pcr_2	-1.13109	-0.909313	-1.18619	-1.12883	-1.08886	0.122599	4	17.7629	0.000389042		SiJWG09ACY_pcr_1	2.77828	2.73198	2.30536	2.08023	2.47397	0.337952	4	14.6409	0.000691064
SiJWF07BDV_pcr_1	-1.13271	-1.02675	-1.20354	-0.991317	-1.08858	0.0973768	4	22.3581	0.000195906		SiJWG09CAN_pcr_1	2.14947	2.35388	2.79043	2.66561	2.48985	0.291882	4	17.0607	0.000438669
SiJWD07BBE_pcr_1	-1.04204	-1.20217	-0.967475	-1.14222	-1.08848	0.104263	4	20.8795	0.000240291		SiJWE10BBV_pcr_1	2.45947	2.72844	2.40299	2.43554	2.50661	0.149686	4	33.4917	5.85152e-05
SiJWF06BAN_pcr_1	-0.925898	-1.08831	-1.15001	-1.18861	-1.08821	0.115821	4	18.7912	0.000329003		SiJWB11ABJ_pcr_2	2.60337	2.6579	2.31733	2.47156	2.51254	0.151836	4	33.0953	6.0638e-05
SiJWF10AAL_pcr_2	-1.2037	-1.03943	-1.03953	-1.06246	-1.08628	0.0790244	4	27.4923	0.000105627		SiJWC09CAR_pcr_1	2.67895	2.41877	2.4226	2.53387	2.51355	0.122508	4	41.0349	3.1848e-05
SiJWE09ADT_pcr_1	-1.18495	-1.12586	-1.13734	-0.892139	-1.08507	0.131141	4	16.5481	0.000480336		SiJWF07ADF_pcr_1	2.54176	2.51498	2.44483	2.58413	2.52142	0.0584635	4	86.2563	3.43469e-06
SiJWG03ABI_pcr_2	-1.064	-1.09524	-1.28539	-0.886068	-1.08267	0.163558	4	13.239	0.000931229		SiJWH08BDL_pcr_1	2.87443	2.43647	2.52166	2.25882	2.52285	0.258707	4	19.5035	0.000294467
SiJWC03ACS_pcr_1	-1.04449	-1.30382	-1.0196	-0.962512	-1.08261	0.151419	4	14.2995	0.000741164		SiJWF11AAN_pcr_2	2.44167	2.34385	2.62354	2.69736	2.52661	0.162445	4	31.1073	7.29915e-05
SiJWA07AAX_pcr_2	-1.04747	-1.04492	-1.10218	-1.13465	-1.0823	0.0437659	4	49.4587	1.82013e-05		SiJWD06BAA_pcr_2	2.5336	2.41404	2.73585	2.43107	2.52864	0.147891	4	34.1961	5.498e-05
SiJWH11ABZ_pcr_2	-0.862952	-1.09505	-1.17623	-1.186	-1.08005	0.150367	4	14.3656	0.000731099		SiJWG01ACP_pcr_2	2.50756	2.57678	2.69117	2.34405	2.52989	0.145195	4	34.8482	5.19571e-05
SiJWG06BBD_pcr_1	-0.99027	-1.18187	-0.905511	-1.24071	-1.07959	0.1578	4	13.683	0.000844572		SiJWA02AA1_pcr_1	2.44226	2.8656	2.47611	2.42378	2.55194	0.210229	4	24.2778	0.000153179
SiJWB11BBV_pcr_1	-1.21282	-1.15218	-0.947331	-0.99178	-1.07603	0.126715	4	16.9833	0.000444638		SiJWF01CAR_pcr_1	2.24563	2.45604	2.67833	2.83622	2.55406	0.258068	4	19.7937	0.000281783
SiJWB03ADR_pcr_1	-1.12594	-1.2423	-0.887322	-1.01694	-1.06813	0.151646	4	14.0871	0.000774794		SiJWE11ACK_pcr_2	2.83311	2.63834	2.42173	2.32998	2.55579	0.225599	4	22.6578	0.000188269
SiJWG11ADM_pcr_1	-0.882801	-1.11355	-1.06176	-1.21268	-1.0677	0.138257	4	15.4451	0.000589635		SiJWH02BAD_pcr_1	2.70493	2.177	2.60877	2.73892	2.5574	0.259524	4	19.7084	0.000285435
SiJWD12BDI_pcr_1	-0.971517	-0.99984	-1.16616	-1.1321	-1.06741	0.0960876	4	22.2173	0.000199635		SiJWD10BDC_pcr_1	2.50326	2.63422	2.66075	2.45609	2.56358	0.0993764	4	51.5933	1.60362e-05
SiJWG06ADY_pcr_1	-1.0439	-1.07193	-1.11953	-1.02833	-1.06592	0.0400325	4	53.253	1.45844e-05		SiJWG11ADF_pcr_1	2.30502	2.34043	2.83836	2.8001	2.57098	0.287448	4	17.8883	0.000380976
SiJWD05BAP_pcr_1	-1.14956	-1.19307	-1.00079	-0.919146	-1.06564	0.127734	4	16.6853	0.000468687		SiJWD04BAC_pcr_1	2.49453	2.50458	2.79083	2.50446	2.5736	0.144894	4	35.524	4.90533e-05
SiJWF03AAC_pcr_1	-0.974648	-1.00708	-1.00309	-1.26842	-1.06331	0.137501	4	15.4662	0.000587247		SiJWH01BDF_pcr_1	2.7492	2.27197	2.69226	2.59284	2.57657	0.213099	4	24.1819	0.000155
SiJWE11ADQ_pcr_1	-1.0661	-0.876782	-1.20101	-1.09291	-1.0592	0.13487	4	15.707	0.000560905		SiJWH10BBY_pcr_1	2.10775	2.43961	2.75226	3.01615	2.57894	0.392694	4	13.1346	0.000953299
SiJWB06ACG_pcr_2	-0.977867	-1.18395	-1.17823	-0.887328	-1.05684	0.148172	4	14.2651	0.00074648		SiJWH10AAI_pcr_2	2.88526	2.69972	2.45266	2.29408	2.58293	0.261693	4	19.7401	0.000284068
SiJWG07ADF_pcr_1	-0.9173	-1.19379	-1.16223	-0.942688	-1.054	0.144146	4	14.6242	0.000693419		SiJWF10AAK_pcr_2	2.90441	2.60266	2.50042	2.33535	2.58571	0.23931	4	21.6097	0.000216863
SiJWA07ABD_pcr_2	-0.942143	-1.21424	-0.937689	-1.1197	-1.05344	0.136664	4	15.4165	0.000592885		SiJWA10BBL_pcr_1	2.10798	2.5523	2.77159	2.92552	2.58935	0.35558	4	14.5641	0.000701939
SiJWB09ADD_pcr_1	-1.07001	-0.887668	-1.17886	-1.05243	-1.04724	0.120184	4	17.4273	0.000411772		SiJWA12BCP_pcr_1	2.3468	2.64475	2.72147	2.67758	2.59765	0.170158	4	30.5321	7.71835e-05
SiJWH10ADS_pcr_1	-1.0205	-1.01228	-0.996694	-1.15768	-1.04679	0.0745814	4	28.071	9.92467e-05		SiJWH11BDQ_pcr_1	2.57706	2.52647	2.49118	2.83669	2.60785	0.156581	4	33.3098	5.94767e-05
SiJWG05CAL_pcr_1	-1.15895	-0.915089	-0.986325	-1.11821	-1.04464	0.113526	4	18.4036	0.000350076		SiJWH09AEA_pcr_1	2.55828	2.62408	2.60334	2.64833	2.60851	0.0382023	4	136.563	8.65743e-07
SiJWE06BCA_pcr_1	-1.2466	-0.946184	-1.02932	-0.949482	-1.0429	0.141135	4	14.7787	0.000672128		SiJWD04AAA_pcr_2	2.5807	2.21914	2.79098	2.86947	2.61507	0.290748	4	17.9886	0.000374686
SiJWC05ACA_pcr_2	-0.904085	-1.05768	-1.05726	-1.14271	-1.04043	0.0993842	4	20.9376	0.000238307		SiJWH12CAD_pcr_1	2.72245	2.29582	2.72036	2.75546	2.62352	0.219059	4	23.9527	0.000159474
SiJWD02ABH_pcr_2	-1.10926	-1.14465	-1.06131	-0.833584	-1.0372	0.139975	4	14.8198	0.000666613		SiJWH03ADY_pcr_newprimers	2.26747	2.29753	2.99322	2.93811	2.62408	0.395257	4	13.2778	0.000923192
SiJWD08BAA_pcr_2	-0.868023	-0.97613	-1.15016	-1.15225	-1.03664	0.139457	4	14.8668	0.000660374		SiJWG08ADO_pcr_1	2.76503	3.02618	2.3096	2.40083	2.62541	0.331804	4	15.8251	0.00054856
SiJWD03ACL_pcr_2	-0.957135	-1.02339	-1.15841	-1.0072	-1.03653	0.0860051	4	24.104	0.000156502		SiJWD07AAT_pcr_2	2.55962	2.34248	2.46852	3.17413	2.63619	0.369515	4	14.2684	0.000745968
SiJWF06BDL_pcr_1	-1.08314	-0.840448	-1.09254	-1.12987	-1.0365	0.132251	4	15.6748	0.000564338		SiJWF07ADH_pcr_1	2.6635	2.80229	2.46902	2.61359	2.6371	0.137582	4	38.3351	3.90499e-05
SiJWH05BAF_pcr_1	-1.14269	-1.11073	-0.921934	-0.963234	-1.03465	0.108422	4	19.0856	0.000314105		SiJWG06ADT_pcr_1	2.89932	2.54002	2.73634	2.37464	2.63758	0.228706	4	23.0653	0.00017851
SiJWA11AAX_pcr_1	-1.15963	-1.11769	-0.951196	-0.90956	-1.03452	0.12265	4	16.8695	0.000453626		SiJWC02BCG_pcr_1	2.18516	3.10305	2.52941	2.75246	2.64252	0.385636	4	13.7047	0.000840612
SiJWF07BEA_pcr_1	-1.07746	-1.07521	-1.04012	-0.934603	-1.03185	0.067047	4	30.7799	7.53395e-05		SiJWB05AAC_pcr_2	2.25497	2.58313	2.90876	2.83173	2.64465	0.294612	4	17.9534	0.000376879
SiJWD04BBG_pcr_1	-1.17838	-1.07105	-0.95834	-0.914697	-1.03062	0.118505	4	17.3936	0.000414149		SiJWF02ADC_pcr_1	3.02106	2.90437	2.28826	2.40794	2.65541	0.361351	4	14.6971	0.00068326
SiJWD09BBA_pcr_1	-1.04282	-1.01817	-0.866836	-1.19303	-1.03021	0.133546	4	15.4286	0.00059151		SiJWE07CAQ_pcr_1	2.43505	2.58904	2.56264	3.09813	2.67121	0.292443	4	18.2683	0.000357861
SiJWC11BBW_pcr_1	-1.08064	-1.07685	-0.947314	-1.01236	-1.02929	0.0629948	4	32.6786	6.29822e-05		SiJWF10BBK_pcr_1	2.3941	2.2827	3.0698	2.96066	2.67682	0.395921	4	13.522	0.000874713
SiJWC06BDX_pcr_1	-0.9947	-1.06672	-1.0452	-1.00234	-1.02724	0.0344504	4	59.6359	1.03874e-05		SiJWD06ACC_pcr_2	2.64855	2.80462	2.7287	2.55483	2.68418	0.107221	4	50.0681	1.75454e-05
SiJWH08BCF_pcr_1	-1.04972	-0.804431	-1.13376	-1.09357	-1.02037	0.147995	4	13.7893	0.000825439		SiJWE11ADV_pcr_1	2.74524	2.56788	2.55772	2.8713	2.68554	0.150836	4	35.6087	4.87049e-05
SiJWG09BAB_pcr_1	-0.917172	-0.907319	-1.14359	-1.10881	-1.01923	0.124408	4	16.3852	0.000494673		SiJWB05AAC_pcr_1	2.25918	2.59684	2.93741	2.9524	2.68646	0.328786	4	16.3417	0.000498601
SiJWH04BBA_pcr_1	-0.968323	-1.06404	-1.16411	-0.879026	-1.01888	0.122811	4	16.5926	0.000476515		SiJWA07ACO_pcr_2	2.89129	2.7887	2.49313	2.58215	2.68882	0.183159	4	29.3605	8.67701e-05
SiJWB05ABQ_pcr_2	-0.985135	-1.04907	-0.946678	-1.09426	-1.01879	0.06569	4	31.018	7.36219e-05		SiJWC03BCW_pcr_1	2.75106	2.83875	2.4982	2.68418	2.69305	0.144499	4	37.2742	4.24739e-05
SiJWF05AAB_pcr_1	-0.826699	-1.05209	-1.11765	-1.06721	-1.01591	0.129218	4	15.724	0.000559107		SiJWA09CAK_pcr_1	2.45004	2.43391	3.21665	2.73733	2.70948	0.365716	4	14.8174	0.000666929
SiJWB01BBF_pcr_1	-1.05499	-1.20239	-0.883446	-0.906889	-1.01193	0.147953	4	13.6791	0.000845293		SiJWC09BCV_pcr_1	2.36216	2.49197	2.96314	3.04045	2.71443	0.337506	4	16.0852	0.000522614
SiJWD05CAP_pcr_1	-1.00958	-1.10864	-0.875046	-1.0521	-1.01134	0.0995135	4	20.3257	0.000260352		SiJWC06BAD_pcr_1	2.54813	2.84689	2.54424	2.92443	2.71592	0.198542	4	27.3586	0.000107177
SiJWC04ABV_pcr_2	-1.07552	-0.96709	-1.00894	-0.979476	-1.00776	0.0484671	4	41.5852	3.0602e-05		SiJWB03ADH_pcr_1	2.69269	2.61268	2.78055	2.78068	2.71665	0.0807579	4	67.2789	7.23585e-06
SiJWH01CAN_pcr_1	-0.997345	-0.949068	-0.991694	-1.08512	-1.00581	0.0570984	4	35.2307	5.02863e-05		SiJWF07BBD_pcr_1	2.64386	2.39248	2.76484	3.07984	2.72025	0.28552	4	19.0548	0.000315624
SiJWD05BBP_pcr_1	-0.817655	-0.940146	-1.13306	-1.12991	-1.00519	0.15417	4	13.04	0.000973906		SiJWG11BDU_pcr_1	2.56595	2.45522	2.88406	2.9815	2.72168	0.251081	4	21.6797	0.00021478
SiJWG09AA1_pcr_1	-0.99883	-0.880321	-1.20184	-0.923552	-1.00114	0.142482	4	14.0528	0.000780401		SiJWG12BDV_pcr_1	2.46175	2.41185	3.0516	2.99945	2.73116	0.341175	4	16.0103	0.000529915
SiJWG06ADY_pcr_newprimers	-1.14681	-1.04492	-0.816284	-0.991767	-0.999944	0.13831	4	14.4595	0.000717108		SiJWE12ADH_pcr_1	2.66889	2.27599	2.96644	3.02662	2.73448	0.34335	4	15.9283	0.000538067
SiJWE01ACR_pcr_2	-1.16852	-1.04491	-0.922666	-0.861352	-0.99936	0.136158	4	14.6794	0.0006857		SiJWD11BBR_pcr_1	2.9959	2.16602	2.96633	2.84313	2.74284	0.390202	4	14.0586	0.000779455
SiJWD11AAY_pcr_1	-1.04012	-0.975893	-0.933196	-1.04726	-0.999118	0.0544189	4	36.7195	4.44243e-05		SiJWH02BBA_pcr_1	2.63047	2.76017	2.78612	2.80724	2.746	0.079388	4	69.1793	6.65604e-06
SiJWF11CAH_pcr_1	-0.929273	-0.953449	-0.994152	-1.11162	-0.997123	0.0808883	4	24.6543	0.000146294		SiJWG06AAE_pcr_2	2.59056	2.66081	2.77055	2.96417	2.74652	0.162909	4	33.7185	5.73449e-05
SiJWF12ACA_pcr_2	-1.07993	-0.917134	-0.964959	-1.0262	-0.997056	0.0710303	4	28.0741	9.92139e-05		SiJWC04BCO_pcr_1	2.57158	2.9458	2.77103	2.70146	2.74747	0.155929	4	35.2401	5.02462e-05
SiJWC01ADK_pcr_1	-1.05175	-1.10501	-0.978484	-0.852716	-0.996988	0.109275	4	18.2473	0.000359088		SiJWA09BBM_pcr_1	2.41609	3.06647	2.88054	2.65575	2.75472	0.281358	4	19.5816	0.000290981
SiJWG06AAY_pcr_1	-0.892091	-0.924877	-1.18663	-0.978043	-0.995411	0.13231	4	15.0467	0.000637215		SiJWG04BAD_pcr_1	2.66609	3.19299	2.6468	2.53169	2.75939	0.295092	4	18.7019	0.000333703
SiJWG12BAX_pcr_1	-1.13873	-0.854579	-0.927044	-1.05582	-0.994042	0.127396	4	15.6056	0.000571807		SiJWC10BBD_pcr_1	2.34004	2.63851	2.84796	3.25033	2.76921	0.382514	4	14.479	0.000714244
SiJWA12BCM_pcr_1	-1.02416	-0.871612	-1.00414	-1.07239	-0.993074	0.0858921	4	23.1238	0.000177165		SiJWC06ACG_pcr_2	2.27831	2.85694	2.98978	2.98764	2.77817	0.338979	4	16.3914	0.000494124
SiJWG06ADL_pcr_1	-0.848379	-1.14184	-1.03172	-0.947327	-0.992317	0.124703	4	15.9149	0.000539412		SiJWB11BEA_pcr_2	2.98088	2.60364	2.86789	2.78684	2.80981	0.158822	4	35.3831	4.96404e-05
SiJWF01CAP_pcr_1	-0.912088	-0.923708	-1.01194	-1.09933	-0.986765	0.0872871	4	22.6097	0.000189469		SiJWD03BDB_pcr_1	2.90289	2.84044	2.79988	2.72167	2.81622	0.0759484	4	74.1613	5.40323e-06
SiJWD11ADP_pcr_1	-1.18105	-0.879523	-0.987037	-0.848945	-0.974138	0.150114	4	12.9787	0.000987592		SiJWE02AEA_pcr_1	2.98067	2.70313	2.75609	2.8945	2.83359	0.126974	4	44.6325	2.4759e-05
SiJWE01BBP_pcr_1	-0.975885	-1.10355	-1.0439	-0.763289	-0.971655	0.148378	4	13.097	0.000961428		SiJWG02BCP_pcr_1	2.65192	2.3842	3.27516	3.06544	2.84418	0.401351	4	14.173	0.000760944
SiJWE01BAQ_pcr_1	-0.810844	-1.01712	-1.05358	-1.0038	-0.971337	0.109045	4	17.8154	0.000385636		SiJWA01AAR_pcr_2	3.28736	3.14404	2.37375	2.57806	2.8458	0.439107	4	12.9618	0.0009914
SiJWA06BBT_pcr_1	-1.03547	-1.1045	-0.952833	-0.791288	-0.971023	0.134913	4	14.3948	0.0007267		SiJWG03CAI_pcr_1	2.58805	2.75597	3.18079	2.89569	2.85513	0.25091	4	22.7581	0.000185802
SiJWB11ACJ_pcr_2	-0.950177	-0.858318	-1.07272	-0.992121	-0.968334	0.0892474	4	21.7	0.000214182		SiJWG09BBA_pcr_1	2.85195	2.9528	2.58113	3.05471	2.86015	0.2036	4	28.0957	9.89857e-05
SiJWC11AAU_pcr_2	-0.816729	-0.949082	-1.10957	-0.989308	-0.966171	0.120724	4	16.0063	0.000530306		SiJWB03CAI_pcr_1	2.79661	2.55759	3.08846	3.01467	2.86433	0.239103	4	23.959	0.000159349
SiJWE12ABX_pcr_2	-1.06188	-0.914397	-0.90597	-0.980911	-0.965789	0.0722984	4	26.7168	0.000115062		SiJWB08ACP_pcr_2	2.78535	2.87122	2.97479	2.82717	2.86463	0.081378	4	70.4031	6.31509e-06
SiJWB04AAR_pcr_2	-0.825143	-0.857031	-1.11906	-1.05772	-0.964738	0.145543	4	13.2571	0.000927472		SiJWA09BCU_pcr_1	2.54426	2.79542	3.07342	3.10304	2.87904	0.262696	4	21.9192	0.000207852
SiJWB11ABR_pcr_2	-1.10141	-0.947696	-0.860394	-0.94313	-0.963157	0.10052	4	19.1634	0.000310322		SiJWB12ADT_pcr_1	2.8735	2.72693	2.84891	3.08379	2.88328	0.148241	4	38.9	3.73757e-05
SiJWB05BBV_pcr_1	-0.931983	-1.10264	-0.878975	-0.92552	-0.959778	0.098122	4	19.563	0.000291808		SiJWH12BBC_pcr_1	2.64031	2.92301	2.9986	3.03287	2.8987	0.178267	4	32.5209	6.39008e-05
SiJWE09ADS_pcr_1	-1.01003	-1.05097	-0.872527	-0.901105	-0.958659	0.0854247	4	22.4445	0.000193662		SiJWD12ADC_pcr_1	2.92953	3.21777	2.65984	2.79551	2.90066	0.238358	4	24.3387	0.000152035
SiJWD08ACP_pcr_2	-0.984557	-0.957599	-0.901349	-0.986916	-0.957605	0.039792	4	48.1305	1.97485e-05		SiJWD06AAA_pcr_2	3.13118	3.26189	2.56292	2.69467	2.91267	0.336428	4	17.3152	0.000419754
SiJWD08ACF_pcr_2	-0.868666	-0.920976	-1.12062	-0.917351	-0.956903	0.11172	4	17.1304	0.00043338		SiJWF01BBW_pcr_1	2.67207	3.28243	2.72174	2.97972	2.91399	0.280209	4	20.7987	0.000243085
SiJWF07BEA_pcr_2	-1.02083	-1.03316	-0.890996	-0.867563	-0.953137	0.0859661	4	22.1747	0.000200782		SiJWG07ABR_pcr_2	2.95688	2.66768	2.93676	3.11225	2.91839	0.184621	4	31.615	6.95394e-05
SiJWA02ADT_pcr_1	-1.13712	-0.91999	-0.838668	-0.91447	-0.952563	0.128513	4	14.8244	0.000665991		SiJWE05BAD_pcr_1	2.75172	2.81294	3.07797	3.03737	2.92	0.161773	4	36.1001	4.67464e-05
SiJWF10BBA_pcr_1	-1.04542	-0.95061	-0.983694	-0.823565	-0.950822	0.0934947	4	20.3396	0.000259823		SiJWA12BBZ_pcr_1	2.76821	2.65114	3.07967	3.18593	2.92124	0.252676	4	23.1225	0.000177195
SiJWE10BDK_pcr_1	-1.08167	-0.947201	-0.861738	-0.909594	-0.950051	0.0944592	4	20.1156	0.000268549		SiJWF04BCJ_pcr_1	2.99046	2.84376	2.90588	2.96004	2.92503	0.0644913	4	90.711	2.95325e-06
SiJWF01BAO_pcr_1	-1.05103	-1.04075	-0.831531	-0.876447	-0.949939	0.112379	4	16.9059	0.000450722		SiJWE09AAQ_pcr_2	2.85435	2.9284	2.91506	3.04215	2.93499	0.0783709	4	74.8999	5.24503e-06
SiJWG11BAE_pcr_1	-0.856834	-0.92356	-1.03508	-0.978701	-0.948543	0.0762286	4	24.8868	0.000142248		SiJWD08ADF_pcr_1	2.58128	2.65631	3.07462	3.43094	2.93579	0.395069	4	14.8622	0.000660984
SiJWG06ADX_pcr_1	-0.828315	-1.02033	-1.03544	-0.909819	-0.948478	0.0977406	4	19.4081	0.000298806		SiJWA06BDU_pcr_1	2.69306	2.588	3.13989	3.33906	2.94	0.357812	4	16.4332	0.000490391
SiJWG12AAI_pcr_2	-0.95137	-0.97652	-0.818409	-1.04521	-0.947878	0.0949884	4	19.9577	0.000274932		SiJWF02ACE_pcr_2	2.98366	3.32443	2.70662	2.78206	2.94919	0.276144	4	21.3598	0.000224525
SiJWH05ADV_pcr_1	-0.969013	-0.975082	-1.06279	-0.771775	-0.944665	0.122966	4	15.3646	0.000598857		SiJWG08ACR_pcr_2	2.7575	3.16921	3.0359	2.86408	2.95667	0.182292	4	32.4389	6.43857e-05
SiJWD09ADU_pcr_1	-0.812959	-1.00354	-0.99155	-0.969324	-0.944344	0.0887304	4	21.2857	0.000226865		SiJWD06ABH_pcr_2	2.67781	3.26283	2.73924	3.15276	2.95816	0.292811	4	20.2052	0.00026501
SiJWB03BDP_pcr_1	-1.00264	-0.887968	-1.02904	-0.840362	-0.940003	0.0903462	4	20.8089	0.00024273		SiJWC11BBF_pcr_1	2.81835	2.8936	2.95138	3.17298	2.95908	0.152653	4	38.7688	3.77559e-05
SiJWE03ACZ_pcr_1	-1.01626	-1.03092	-0.930148	-0.781086	-0.939603	0.114647	4	16.3912	0.000494137		SiJWF11BBU_pcr_1	2.67275	2.82187	3.21828	3.17313	2.97151	0.266582	4	22.2933	0.00019761
SiJWH01ABX_pcr_2	-1.02912	-0.924993	-0.978108	-0.819055	-0.937818	0.0898662	4	20.8714	0.000240567		SiJWC02ABB_pcr_2	3.44081	3.31403	2.63916	2.54705	2.98526	0.457321	4	13.0554	0.000970505
SiJWG12AAJ_pcr_2	-0.926127	-0.958437	-0.941962	-0.92373	-0.937564	0.0160958	4	116.498	1.39445e-06		SiJWB06BAC_pcr_1	2.61989	3.30258	3.00163	3.0313	2.98885	0.280786	4	21.2892	0.000226755
SiJWH12BAE_pcr_1	-0.849942	-1.12092	-0.822373	-0.95088	-0.936028	0.135072	4	13.8597	0.000813074		SiJWF05AAX_pcr_2	3.44762	3.0896	2.74934	2.67125	2.98945	0.355366	4	16.8246	0.000457236
SiJWB05BAV_pcr_1	-0.95018	-0.865169	-1.0408	-0.880543	-0.934173	0.0801323	4	23.3158	0.000172843		SiJWD06AAV_pcr_2	2.49781	3.05487	3.42358	2.99861	2.99372	0.380559	4	15.7333	0.000558127
SiJWA10BDJ_pcr_1	-1.08176	-0.88097	-0.970689	-0.801737	-0.933788	0.120393	4	15.5123	0.000582079		SiJWE06AAE_pcr_2	2.89552	2.79962	3.09677	3.1858	2.99443	0.177795	4	33.6841	5.75202e-05
SiJWG02BBT_pcr_1	-1.08306	-0.760776	-0.945618	-0.940914	-0.932591	0.13216	4	14.1131	0.000770571		SiJWE01AAK_pcr_2	2.54725	2.88212	3.22247	3.32979	2.99541	0.354521	4	16.8983	0.000451326
SiJWD06CAD_pcr_1	-1.1078	-0.861774	-0.851877	-0.900637	-0.930522	0.120045	4	15.5029	0.000583126		SiJWG11AAK_pcr_2	2.9859	3.01143	2.9793	3.03319	3.00245	0.024735	4	242.769	1.54121e-07
SiJWC12BDA_pcr_1	-0.822694	-0.972816	-1.02956	-0.89657	-0.930409	0.0901411	4	20.6434	0.000248583		SiJWH08AAI_pcr_2	3.10722	3.24612	2.59131	3.06742	3.00302	0.284959	4	21.0768	0.00023364
SiJWA11AAX_pcr_2	-0.882989	-0.95467	-0.965842	-0.913155	-0.929164	0.0382285	4	48.611	1.91693e-05		SiJWC10ACQ_pcr_2	2.8123	2.8964	3.2862	3.03935	3.00856	0.207471	4	29.0023	9.0016e-05
SiJWF03ADN_pcr_1	-0.904524	-0.974566	-0.889202	-0.945829	-0.92853	0.0389081	4	47.7295	2.025e-05		SiJWD01ABU_pcr_2	2.73202	3.22892	2.95291	3.1716	3.02136	0.226611	4	26.6656	0.000115723
SiJWE10ADM_pcr_1	-1.10708	-0.874261	-0.851651	-0.874735	-0.926932	0.120582	4	15.3743	0.000597732		SiJWB12ADG_pcr_1	3.1968	3.21328	2.68225	3.00647	3.0247	0.246836	4	24.5078	0.000148923
SiJWA10ACM_pcr_2	-1.08561	-0.948726	-0.908306	-0.759232	-0.925469	0.134308	4	13.7813	0.000826861		SiJWA05ACN_pcr_2	2.91451	2.93634	3.13823	3.20462	3.04843	0.144863	4	42.087	2.95219e-05
SiJWC10AAL_pcr_2	-1.00299	-0.919345	-0.938129	-0.839432	-0.924973	0.0673503	4	27.4675	0.000105912		SiJWD06BDO_pcr_1	2.96499	3.16228	2.92788	3.2454	3.07514	0.15319	4	40.1479	3.40026e-05
SiJWC10BAQ_pcr_1	-0.767439	-0.988862	-0.914509	-1.02589	-0.924175	0.114295	4	16.1718	0.000514338		SiJWH11ACH_pcr_2	3.22059	3.02247	3.03918	3.0589	3.08529	0.0914257	4	67.4927	7.16732e-06
SiJWC11AAI_pcr_2	-0.846229	-0.843079	-1.04418	-0.958028	-0.922878	0.0969393	4	19.0403	0.000316339		SiJWB11BAU_pcr_1	3.44555	3.34837	2.77722	2.77222	3.08584	0.36144	4	17.0753	0.000437555
SiJWC05ABB_pcr_2	-1.01011	-0.748812	-0.979751	-0.951173	-0.922462	0.118242	4	15.603	0.000572086		SiJWB08BCB_pcr_1	2.90364	2.94796	3.27508	3.24255	3.09231	0.193569	4	31.9504	6.73768e-05
SiJWC03BBS_pcr_1	-0.786228	-0.916302	-1.03793	-0.923983	-0.916111	0.10291	4	17.8041	0.00038637		SiJWH08BCD_pcr_1	3.18408	2.89746	3.13773	3.1845	3.10094	0.137422	4	45.1302	2.39498e-05
SiJWC02AAO_pcr_2	-0.833304	-0.849581	-0.981373	-0.993161	-0.914355	0.0845909	4	21.6183	0.000216607		SiJWE02ACO_pcr_2	3.09893	3.43957	3.10698	2.76964	3.10378	0.273522	4	22.6949	0.000187352
SiJWD03ABS_pcr_2	-0.929175	-1.0268	-0.929526	-0.759493	-0.911248	0.111111	4	16.4024	0.000493135		SiJWG03BAT_pcr_1	2.75881	3.05923	3.11502	3.50897	3.11051	0.308281	4	20.1797	0.000266011
SiJWD03BDK_pcr_1	-0.920224	-0.919494	-0.963004	-0.83422	-0.909236	0.0539888	4	33.6824	5.7529e-05		SiJWC05ACM_pcr_2	3.40811	2.98984	3.02376	3.02161	3.11083	0.198796	4	31.2966	7.16776e-05
SiJWB07ACI_pcr_2	-0.734878	-1.01705	-0.960046	-0.922857	-0.908708	0.122189	4	14.8738	0.000659457		SiJWA04ADZ_pcr_1	3.51174	3.4784	2.89388	2.5848	3.11721	0.454405	4	13.7199	0.000837857
SiJWH08ADE_pcr_1	-0.793917	-0.903893	-0.942667	-0.964888	-0.901341	0.0759219	4	23.7439	0.000163699		SiJWG10ACG_pcr_2	3.24102	3.39125	2.89315	2.96913	3.12364	0.232662	4	26.8513	0.000113347
SiJWG02ADL_pcr_1	-0.732442	-0.951772	-1.03827	-0.880967	-0.900863	0.129401	4	13.9236	0.000802073		SiJWD07AAD_pcr_2	3.00051	2.84566	3.3645	3.32509	3.13394	0.252061	4	24.8666	0.000142594
SiJWH04AAI_pcr_2	-0.960904	-0.840427	-0.849563	-0.949377	-0.900068	0.0638755	4	28.182	9.80826e-05		SiJWE06ACH_pcr_2	3.22658	3.46115	2.96279	2.89619	3.13668	0.259126	4	24.2097	0.000154469
SiJWC08CAR_pcr_1	-0.823176	-0.938063	-0.826913	-1.00693	-0.89877	0.0896662	4	20.047	0.000271297		SiJWA06CAH_pcr_1	3.49115	3.38415	2.88505	2.85009	3.15261	0.332327	4	18.973	0.000319698
SiJWF11BAV_pcr_1	-0.851339	-0.784315	-0.939509	-1.01816	-0.89833	0.102082	4	17.6002	0.000399848		SiJWA07CAH_pcr_1	3.04497	3.1225	3.22245	3.23198	3.15547	0.0887646	4	71.0975	6.13195e-06
SiJWH12ABR_pcr_2	-0.919882	-0.847261	-0.922548	-0.90182	-0.897878	0.0349782	4	51.3393	1.62753e-05		SiJWC04ABC_pcr_2	2.99657	2.92575	3.34513	3.41926	3.17168	0.246661	4	25.7169	0.00012896
SiJWA03ACX_pcr_1	-0.943831	-1.00407	-0.779338	-0.862657	-0.897474	0.0977755	4	18.3579	0.000352683		SiJWB10ADW_pcr_1	3.15546	3.34689	3.28814	2.96145	3.18799	0.170937	4	37.3001	4.23857e-05
SiJWE10BDI_pcr_1	-0.907138	-1.00055	-0.830485	-0.846726	-0.896226	0.0769756	4	23.286	0.000173505		SiJWC09AAU_pcr_2	2.8197	2.85469	3.66364	3.45313	3.19779	0.425395	4	15.0344	0.000638756
SiJWH07CAG_pcr_1	-0.831898	-0.925727	-0.870924	-0.937979	-0.891632	0.0493543	4	36.1319	4.66232e-05		SiJWC12BAI_pcr_2	3.45851	3.52145	2.90886	2.94019	3.20725	0.327726	4	19.5728	0.000291372
SiJWE12BDM_pcr_1	-1.02331	-0.966265	-0.787567	-0.774795	-0.887983	0.125612	4	14.1385	0.000766473		SiJWD06CAP_pcr_1	3.06915	2.97566	3.55754	3.2456	3.21199	0.256119	4	25.082	0.000138965
SiJWF01BCL_pcr_1	-0.825794	-0.962067	-0.904529	-0.852813	-0.886301	0.0601538	4	29.4678	8.5828e-05		SiJWB11CAA_pcr_1	3.06269	3.21089	3.2989	3.31846	3.22273	0.116503	4	55.3244	1.3008e-05
SiJWF12BDL_pcr_1	-0.798974	-0.85673	-0.926125	-0.959484	-0.885328	0.0717365	4	24.6828	0.00014579		SiJWG05AAO_pcr_2	3.37704	3.38577	3.09946	3.03579	3.22452	0.18305	4	35.2309	5.02852e-05
SiJWA07BAY_pcr_1	-0.817292	-0.824507	-0.796777	-1.07939	-0.879492	0.133783	4	13.148	0.000950433		SiJWF01AAV_pcr_2	3.09255	3.32029	3.24042	3.29107	3.23608	0.101216	4	63.9443	8.42721e-06
SiJWH12ABS_pcr_2	-0.899336	-0.966871	-0.858791	-0.79115	-0.879037	0.0736228	4	23.8795	0.000160939		SiJWD09ADQ_pcr_1	2.89149	3.34148	3.09332	3.63413	3.24011	0.320732	4	20.2045	0.000265041
SiJWF04BBX_pcr_1	-0.723029	-0.965189	-0.842904	-0.974893	-0.876503	0.118643	4	14.7754	0.000672567		SiJWA07CAT_pcr_1	3.35712	2.91083	3.39593	3.30144	3.24133	0.22372	4	28.9766	9.02542e-05
SiJWB04ADI_pcr_1	-0.86449	-0.873194	-0.960586	-0.791043	-0.872328	0.0694236	4	25.1306	0.000138163		SiJWF05ADG_pcr_1	3.21814	3.27353	3.27067	3.20428	3.24165	0.0356245	4	181.99	3.6583e-07
SiJWA03BBP_pcr_1	-0.871238	-0.925303	-0.881416	-0.805041	-0.870749	0.0496912	4	35.0464	5.10821e-05		SiJWG12BBY_pcr_1	3.76269	2.8423	3.0177	3.36297	3.24642	0.406508	4	15.9722	0.00053368
SiJWC07CAO_pcr_1	-0.894502	-0.87604	-0.977194	-0.734997	-0.870683	0.100584	4	17.3126	0.000419943		SiJWH11BDE_pcr_1	3.24885	3.20537	3.14482	3.41149	3.25263	0.114172	4	56.9777	1.1909e-05
SiJWC02BDY_pcr_1	-0.874309	-0.842461	-0.986845	-0.759296	-0.865728	0.0941844	4	18.3837	0.00035121		SiJWD05BCX_pcr_1	3.48263	3.54856	2.87107	3.11578	3.25451	0.318739	4	20.4211	0.00025674
SiJWE06BAR_pcr_1	-0.847679	-0.808256	-0.872301	-0.920614	-0.862213	0.0470285	4	36.6677	4.46127e-05		SiJWD05BBB_pcr_1	3.07251	2.90145	3.46435	3.59686	3.25879	0.326056	4	19.9891	0.000273646
SiJWH07BCJ_pcr_1	-0.722723	-0.986953	-0.815734	-0.914471	-0.85997	0.115309	4	14.9159	0.000653941		SiJWB12BBC_pcr_1	3.21994	3.22536	3.09673	3.53868	3.27018	0.1886	4	34.6785	5.2722e-05
SiJWB02ADB_pcr_1	-0.899346	-0.986821	-0.730626	-0.816492	-0.858321	0.109926	4	15.6164	0.00057063		SiJWG06AAV_pcr_2	3.3758	3.52621	3.16631	3.01459	3.27073	0.2257	4	28.983	9.01952e-05
SiJWC07BAQ_pcr_1	-0.903945	-0.960727	-0.853823	-0.71211	-0.857652	0.106403	4	16.1209	0.000519185		SiJWH12AAW_pcr_2	2.81756	3.25474	3.22419	3.7954	3.27297	0.401265	4	16.3133	0.000501193
SiJWH06BCF_pcr_1	-0.939844	-0.92834	-0.765788	-0.782685	-0.854164	0.0926694	4	18.4347	0.000348325		SiJWB12ACY_pcr_1	2.89681	3.18611	3.52277	3.54731	3.28825	0.308636	4	21.3083	0.000226148
SiJWH04ABF_pcr_2	-0.799216	-0.779379	-0.949293	-0.880709	-0.852149	0.0782089	4	21.7916	0.000211505		SiJWD06ADK_pcr_1	3.13777	3.52952	3.18047	3.31105	3.2897	0.176052	4	37.3719	4.21421e-05
SiJWH06AAR_pcr_2	-0.833501	-0.820582	-0.874965	-0.858053	-0.846775	0.0243868	4	69.4453	6.57989e-06		SiJWB02AAC_pcr_2	3.0928	3.54702	3.01112	3.52239	3.29333	0.280882	4	23.4499	0.000169907
SiJWF08ADT_pcr_1	-0.927528	-0.870134	-0.837359	-0.736795	-0.842954	0.0799844	4	21.078	0.000233602		SiJWC10ABT_pcr_2	3.54592	3.65631	3.02397	3.01366	3.30996	0.339227	4	19.5148	0.000293962
SiJWD06BDI_pcr_1	-0.888715	-0.677165	-0.919304	-0.868657	-0.83846	0.109528	4	15.3104	0.000605177		SiJWE01ADI_pcr_1	2.65359	3.44006	3.40492	3.7549	3.31337	0.467153	4	14.1854	0.000758986
SiJWF12AAC_pcr_2	-0.700929	-0.834598	-0.918583	-0.896153	-0.837566	0.0977662	4	17.1341	0.000433101		SiJWA02BDK_pcr_1	3.05366	2.84639	3.76573	3.59346	3.31481	0.435352	4	15.2282	0.000614928
SiJWB04BAI_pcr_2	-0.768209	-0.95851	-0.813091	-0.80664	-0.836613	0.0836452	4	20.0038	0.000273047		SiJWD02ADA_pcr_1	2.80166	3.08362	3.70595	3.69614	3.32184	0.452759	4	14.6738	0.000686484
SiJWA07ADQ_pcr_1	-0.901112	-0.925821	-0.747378	-0.76824	-0.835638	0.0908336	4	18.3993	0.000350322		SiJWG12AAV_pcr_2	2.92787	2.95517	3.61685	3.78906	3.32224	0.44534	4	14.92	0.000653406
SiJWD11AAT_pcr_2	-0.851313	-0.880197	-0.844348	-0.763957	-0.834954	0.0498108	4	33.525	5.8341e-05		SiJWF11BAO_pcr_1	3.12756	3.33546	3.43896	3.4048	3.3267	0.139564	4	47.6726	2.03225e-05
SiJWF07BBP_pcr_1	-0.869956	-0.773725	-0.921725	-0.771753	-0.83429	0.0741527	4	22.502	0.00019219		SiJWH01AAR_pcr_2	3.55484	3.3695	3.23092	3.16615	3.33036	0.172024	4	38.7197	3.78995e-05
SiJWH09CAB_pcr_1	-0.835395	-0.913587	-0.811863	-0.76959	-0.832609	0.060462	4	27.5415	0.000105063		SiJWB11BCT_pcr_1	2.82418	3.3248	3.48161	3.69415	3.33119	0.370344	4	17.9897	0.000374619
SiJWA05BAA_pcr_2	-0.832874	-0.803104	-0.853222	-0.827976	-0.829294	0.0205992	4	80.517	4.22248e-06		SiJWD08ACZ_pcr_1	3.56335	3.59528	3.12991	3.15522	3.36094	0.252709	4	26.5993	0.000116588
SiJWH09BCG_pcr_1	-0.877389	-0.854951	-0.717049	-0.866796	-0.829046	0.075225	4	22.0418	0.000204419		SiJWB08BBP_pcr_1	3.05766	3.00498	3.47448	3.93998	3.36927	0.434583	4	15.5058	0.000582808
SiJWC05ABY_pcr_2	-0.737404	-0.863086	-0.835186	-0.873813	-0.827372	0.0621489	4	26.6255	0.000116246		SiJWA12BDQ_pcr_1	2.90738	2.96919	3.74085	3.87542	3.37321	0.505833	4	13.3373	0.000911068
SiJWE09ADA_pcr_1	-0.805831	-0.923002	-0.700565	-0.878161	-0.82689	0.0970697	4	17.037	0.000440482		SiJWC02BBA_pcr_1	3.2772	2.98368	3.42422	3.82506	3.37754	0.350068	4	19.2965	0.000303985
SiJWA08CAF_pcr_1	-0.726243	-0.86579	-0.797635	-0.912305	-0.825494	0.0812134	4	20.329	0.000260227		SiJWF03ADI_pcr_1	3.01196	3.15863	3.57523	3.8066	3.38811	0.367105	4	18.4585	0.000346986
SiJWB10ABW_pcr_2	-0.870877	-0.896051	-0.702624	-0.812575	-0.820532	0.0860299	4	19.0755	0.000314603		SiJWH01ADD_pcr_1	3.75356	3.72471	3.16168	2.9319	3.39297	0.410754	4	16.5207	0.000482713
SiJWA01BCP_pcr_1	-0.875157	-0.805294	-0.801097	-0.79941	-0.820239	0.036695	4	44.7058	2.46376e-05		SiJWE03BCU_pcr_1	3.83495	3.63063	3.16406	2.97591	3.40139	0.399116	4	17.0446	0.000439901
SiJWA04BDG_pcr_1	-0.944044	-0.852254	-0.795111	-0.689402	-0.820203	0.106618	4	15.3858	0.000596412		SiJWD06BAW_pcr_1	3.62483	3.62745	3.20385	3.24613	3.42557	0.232246	4	29.4994	8.55533e-05
SiJWB10BCX_pcr_1	-0.846568	-0.892618	-0.749795	-0.790954	-0.819984	0.0625877	4	26.2027	0.000121944		SiJWG01BAL_pcr_1	3.57713	3.39704	3.394	3.33978	3.42699	0.103494	4	66.2259	7.58631e-06
SiJWE12ABQ_pcr_2	-0.71504	-0.83526	-0.917265	-0.803094	-0.817665	0.0836142	4	19.5581	0.000292026		SiJWE10ACU_pcr_2	3.9011	3.80128	2.95541	3.07077	3.43214	0.487869	4	14.0699	0.000777597
SiJWC04CAL_pcr_1	-0.665915	-0.765601	-0.928097	-0.86744	-0.806763	0.115378	4	13.9848	0.000791716		SiJWB08BBE_pcr_1	2.7155	3.44919	3.71636	3.93759	3.45466	0.531696	4	12.9949	0.000983952
SiJWC07BDK_pcr_1	-0.709513	-0.770087	-0.838866	-0.882049	-0.800129	0.075994	4	21.0577	0.000234274		SiJWE10BCB_pcr_1	3.44563	3.47173	3.51125	3.40069	3.45733	0.0464019	4	149.016	6.66343e-07
SiJWC10BDQ_pcr_1	-0.760459	-0.92985	-0.691993	-0.815672	-0.799493	0.100556	4	15.9014	0.00054077		SiJWA03BCZ_pcr_1	3.37484	3.47821	3.64574	3.45849	3.48932	0.113497	4	61.4874	9.47761e-06
SiJWB06ABI_pcr_2	-0.946185	-0.847685	-0.691895	-0.703159	-0.797231	0.122035	4	13.0656	0.000968285		SiJWE05ADG_pcr_1	3.50953	3.56199	3.71984	3.22435	3.50393	0.206705	4	33.9027	5.64171e-05
SiJWH08BDV_pcr_1	-0.646084	-0.816612	-0.877897	-0.818965	-0.789889	0.0999748	4	15.8018	0.000550969		SiJWE01ABZ_pcr_2	4.07128	3.7536	3.06701	3.13638	3.50707	0.486544	4	14.4162	0.000723505
SiJWF07BAZ_pcr_1	-0.828174	-0.865708	-0.628463	-0.827807	-0.787538	0.107531	4	14.6477	0.000690117		SiJWA03BCA_pcr_1	3.48105	3.42547	3.7875	3.35041	3.51111	0.191881	4	36.5968	4.48721e-05
SiJWC10BCA_pcr_1	-0.717888	-0.806068	-0.85761	-0.766378	-0.786986	0.0593045	4	26.5405	0.000117362		SiJWF05ACI_pcr_2	2.94602	3.2018	3.8954	4.01266	3.51397	0.520959	4	13.4904	0.00088079
SiJWG04BDV_pcr_1	-0.755172	-0.765883	-0.806961	-0.81881	-0.786706	0.0309245	4	50.8792	1.67204e-05		SiJWD01ACU_pcr_2	2.95158	3.42	3.78725	3.90873	3.51689	0.430348	4	16.3444	0.000498357
SiJWB01BDQ_pcr_1	-0.644482	-0.816157	-0.762025	-0.923313	-0.786494	0.115996	4	13.5607	0.000867343		SiJWG03AAZ_pcr_1	3.94939	3.82843	3.19522	3.1036	3.51916	0.431421	4	16.3143	0.000501102
SiJWE12ACE_pcr_2	-0.80391	-0.923062	-0.721005	-0.693078	-0.785264	0.10322	4	15.2153	0.000616478		SiJWF09BBO_pcr_1	3.31036	3.28279	3.73744	3.7609	3.52287	0.261723	4	26.9206	0.000112477
SiJWE08AAY_pcr_2	-0.768919	-0.753963	-0.774949	-0.840177	-0.784502	0.0381506	4	41.1266	3.16359e-05		SiJWB08ACU_pcr_2	3.21211	3.33267	3.65321	3.92089	3.52972	0.320396	4	22.0335	0.000204649
SiJWG11BDH_pcr_1	-0.748619	-0.690898	-0.734428	-0.940194	-0.778535	0.110535	4	14.0866	0.000774862		SiJWD05BDM_pcr_1	3.36275	3.62501	3.49626	3.6528	3.53421	0.133103	4	53.1047	1.47068e-05
SiJWH01BCX_pcr_1	-0.623932	-0.74429	-0.847154	-0.892618	-0.776999	0.119428	4	13.012	0.00098012		SiJWD04BAY_pcr_1	3.12129	3.04679	3.83937	4.14756	3.53875	0.54078	4	13.0876	0.00096347
SiJWG02BCX_pcr_1	-0.804141	-0.776041	-0.771208	-0.756007	-0.776849	0.0200974	4	77.3084	4.77012e-06		SiJWC09BCA_pcr_1	3.66076	3.66854	3.49394	3.38104	3.55107	0.13905	4	51.0762	1.65278e-05
SiJWC01AAC_pcr_2	-0.749144	-0.792405	-0.783687	-0.781542	-0.776694	0.0189581	4	81.9381	4.00664e-06		SiJWE09BAI_pcr_2	3.27869	3.52196	3.71779	3.69994	3.55459	0.20408	4	34.8353	5.20147e-05
SiJWE11AAA_pcr_2	-0.729971	-0.82152	-0.845511	-0.707163	-0.776041	0.0677274	4	22.9166	0.000181991		SiJWB12BCI_pcr_1	3.16409	3.66335	3.84225	3.61444	3.57103	0.288423	4	24.7625	0.000144393
SiJWC11BAR_pcr_1	-0.798134	-0.859711	-0.755201	-0.690728	-0.775944	0.0711837	4	21.8012	0.000211228		SiJWF12BAD_pcr_1	3.84417	3.71808	3.31861	3.42523	3.57652	0.245684	4	29.1149	8.89785e-05
SiJWH01BCZ_pcr_1	-0.79278	-0.834712	-0.777545	-0.69768	-0.775679	0.0573431	4	27.054	0.000110827		SiJWH03ACF_pcr_2	3.63832	3.47199	3.76056	3.44046	3.57783	0.149575	4	47.8398	2.01103e-05
SiJWH10CAN_pcr_1	-0.799818	-0.883526	-0.747903	-0.645132	-0.769095	0.0997568	4	15.4194	0.00059256		SiJWD01BBF_pcr_1	3.21618	3.18718	3.96621	4.00149	3.59276	0.451971	4	15.8982	0.000541096
SiJWA09ADL_pcr_1	-0.895187	-0.817582	-0.658389	-0.700153	-0.767828	0.108401	4	14.1664	0.000761998		SiJWE08ACL_pcr_2	4.08986	3.71065	3.31898	3.26044	3.59498	0.385735	4	18.6396	0.000337037
SiJWH11ABK_pcr_2	-0.83293	-0.820114	-0.64585	-0.747043	-0.761484	0.0858712	4	17.7355	0.000390834		SiJWH07BAA_pcr_2	3.99882	3.22323	3.53084	3.67983	3.60818	0.32244	4	22.3804	0.000195322
SiJWA12ABF_pcr_2	-0.699775	-0.753875	-0.699942	-0.888457	-0.760512	0.0890164	4	17.087	0.000436659		SiJWA03AAG_pcr_2	3.27493	3.36374	3.85498	3.94263	3.60907	0.338414	4	21.3293	0.000225484
SiJWH09CAE_pcr_1	-0.647994	-0.792823	-0.894552	-0.705443	-0.760203	0.107554	4	14.1362	0.000766833		SiJWG09BCP_pcr_1	3.40533	3.64876	3.795	3.59103	3.61003	0.161224	4	44.7828	2.45108e-05
SiJWD10ADD_pcr_1	-0.769344	-0.887711	-0.636421	-0.746052	-0.759882	0.103059	4	14.7465	0.000676488		SiJWB02AAC_pcr_1	3.86482	4.05195	3.49018	3.0752	3.62054	0.432116	4	16.7572	0.000462726
SiJWE12AAM_pcr_2	-0.721075	-0.772479	-0.700358	-0.836239	-0.757538	0.0605978	4	25.0022	0.000140295		SiJWF04ADF_pcr_1	3.28783	3.186	3.96828	4.04344	3.62139	0.446946	4	16.2051	0.000511208
SiJWB08BAW_pcr_1	-0.812424	-0.817799	-0.58923	-0.803213	-0.755667	0.111121	4	13.6008	0.000859783		SiJWD04BCH_pcr_1	3.80287	3.8455	3.30998	3.55075	3.62727	0.24832	4	29.2145	8.80734e-05
SiJWA09BAZ_pcr_1	-0.663991	-0.8869	-0.712306	-0.758454	-0.755413	0.0957673	4	15.776	0.000553646		SiJWG06ACV_pcr_2	3.41025	3.7972	3.50418	3.81088	3.63063	0.203953	4	35.6025	4.873e-05
SiJWA07BCL_pcr_1	-0.613305	-0.859004	-0.813953	-0.732313	-0.754644	0.107833	4	13.9965	0.000789743		SiJWA07BCR_pcr_1	3.47313	3.69643	3.54678	3.85795	3.64357	0.170459	4	42.7501	2.81712e-05
SiJWG02ADO_pcr_1	-0.724628	-0.780553	-0.694387	-0.817513	-0.75427	0.0552422	4	27.3078	0.000107775		SiJWE01BCN_pcr_1	3.52915	3.37498	3.78374	3.89942	3.64682	0.238256	4	30.6126	7.65778e-05
SiJWG07ADX_pcr_1	-0.612648	-0.823579	-0.817103	-0.762043	-0.753843	0.0980957	4	15.3695	0.000598286		SiJWB08BCD_pcr_1	3.79691	3.51075	3.69199	3.60097	3.65016	0.122665	4	59.5141	1.04513e-05
SiJWB06ACD_pcr_2	-0.828155	-0.701159	-0.781582	-0.684446	-0.748835	0.0677813	4	22.0956	0.000202935		SiJWC10ABG_pcr_2	3.23001	3.40471	3.89315	4.11058	3.65961	0.411277	4	17.7963	0.000386869
SiJWC05BDM_pcr_1	-0.755573	-0.834328	-0.661676	-0.743447	-0.748756	0.0706641	4	21.192	0.000229872		SiJWF01BAE_pcr_1	3.1075	3.33454	4.34686	3.91068	3.6749	0.561225	4	13.096	0.000961647
SiJWH03BBL_pcr_1	-0.788252	-0.611314	-0.775854	-0.818853	-0.748568	0.0932702	4	16.0516	0.000525874		SiJWE01BAM_pcr_1	3.41145	3.63855	3.83027	3.83282	3.67827	0.199801	4	36.8193	4.40647e-05
SiJWG11BAR_pcr_1	-0.752838	-0.751909	-0.774939	-0.710032	-0.747429	0.0271087	4	55.1431	1.31366e-05		SiJWD01BCO_pcr_1	3.99921	4.05392	3.2901	3.37797	3.6803	0.402056	4	18.3074	0.000355586
SiJWC05ADR_pcr_1	-0.686212	-0.624015	-0.846609	-0.831942	-0.747194	0.10948	4	13.6499	0.000850653		SiJWF11AAG_pcr_2	3.8915	3.70236	3.42512	3.72703	3.6865	0.193424	4	38.1184	3.97184e-05
SiJWA05BEA_pcr_1	-0.728133	-0.886403	-0.69879	-0.658457	-0.742946	0.0998124	4	14.8869	0.000657736		SiJWF08BDG_pcr_1	3.28002	4.049	3.63863	3.80905	3.69417	0.323371	4	22.8479	0.00018363
SiJWE10ADI_pcr_1	-0.686738	-0.621203	-0.846167	-0.798675	-0.738196	0.102715	4	14.3737	0.000729871		SiJWH01ABO_pcr_2	4.05619	3.59222	3.67263	3.48313	3.70104	0.249176	4	29.7062	8.37838e-05
SiJWH11ABH_pcr_2	-0.78738	-0.672398	-0.787781	-0.698965	-0.736631	0.059823	4	24.627	0.000146779		SiJWB08BDO_pcr_1	3.52652	3.45947	3.80143	4.0263	3.70343	0.26119	4	28.3582	9.6271e-05
SiJWB05BCF_pcr_1	-0.755282	-0.799568	-0.619936	-0.767882	-0.735667	0.0793715	4	18.5373	0.000342609		SiJWE01BDW_pcr_2	3.73586	3.92143	3.62479	3.54043	3.70563	0.164629	4	45.018	2.4129e-05
SiJWD03BAT_pcr_1	-0.774676	-0.701468	-0.718117	-0.735388	-0.732412	0.0313952	4	46.6576	2.16764e-05		SiJWH02AAT_pcr_2	3.37081	3.38147	3.73286	4.34678	3.70798	0.457888	4	16.196	0.000512057
SiJWB08BDU_pcr_1	-0.594739	-0.783403	-0.743854	-0.806796	-0.732198	0.09525	4	15.3742	0.000597744		SiJWF02ABW_pcr_2	3.18533	3.43761	3.96206	4.30681	3.72295	0.506136	4	14.7113	0.000681306
SiJWF07BDR_pcr_1	-0.748963	-0.718181	-0.628461	-0.83235	-0.731989	0.0842005	4	17.3868	0.000414633		SiJWD08ACY_pcr_1	4.33427	3.9915	3.21654	3.35849	3.7252	0.527599	4	14.1213	0.000769236
SiJWG06AAY_pcr_2	-0.703675	-0.600244	-0.838514	-0.782863	-0.731324	0.103429	4	14.1416	0.000765971		SiJWC04ADT_pcr_1	3.25596	3.31557	4.12926	4.23013	3.73273	0.518322	4	14.4031	0.00072546
SiJWA08CAA_pcr_1	-0.593572	-0.853644	-0.777752	-0.692226	-0.729298	0.11196	4	13.0278	0.000976615		SiJWA04BCV_pcr_1	3.50265	3.59715	4.07793	3.75999	3.73443	0.252464	4	29.5838	8.48251e-05
SiJWE04BAC_pcr_1	-0.755937	-0.685805	-0.736445	-0.711252	-0.72236	0.0304711	4	47.4127	2.06581e-05		SiJWD04BDR_pcr_1	3.2754	3.54024	4.0449	4.08845	3.73725	0.395856	4	18.8819	0.000324316
SiJWA01BCC_pcr_1	-0.751756	-0.818258	-0.731772	-0.587413	-0.7223	0.097228	4	14.8579	0.000661554		SiJWC07CAJ_pcr_1	3.01127	3.91381	3.84075	4.23679	3.75065	0.522094	4	14.3677	0.000730775
SiJWC09BBT_pcr_1	-0.780203	-0.579673	-0.763009	-0.765416	-0.722075	0.0952384	4	15.1635	0.000622746		SiJWF01BBJ_pcr_1	3.37096	3.1772	4.11605	4.36733	3.75788	0.573473	4	13.1057	0.000959534
SiJWE01BBZ_pcr_1	-0.773284	-0.827961	-0.686912	-0.586712	-0.718717	0.105434	4	13.6335	0.000853685		SiJWE09CAI_pcr_1	3.49218	3.68085	3.66184	4.199	3.75847	0.305691	4	24.5899	0.000147441
SiJWH02CAK_pcr_1	-0.659623	-0.705482	-0.742929	-0.758065	-0.716525	0.0439036	4	32.6408	6.32008e-05		SiJWD07ACB_pcr_2	3.39922	3.81405	3.95159	3.89668	3.76538	0.250568	4	30.0548	8.09098e-05
SiJWA01BDA_pcr_1	-0.712034	-0.695685	-0.694102	-0.764111	-0.716483	0.0327701	4	43.7279	2.63256e-05		SiJWC05BDV_pcr_1	3.7094	3.63542	3.847	3.87567	3.76687	0.113781	4	66.2126	7.59088e-06
SiJWG11CAL_pcr_1	-0.714582	-0.771307	-0.659301	-0.712693	-0.714471	0.0457426	4	31.2387	7.20761e-05		SiJWA06BAR_pcr_1	3.32968	3.63019	3.91985	4.19631	3.76901	0.373102	4	20.2036	0.000265073
SiJWE05AAA_pcr_1	-0.625879	-0.725514	-0.725348	-0.771369	-0.712027	0.0613795	4	23.2008	0.000175414		SiJWA05ADY_pcr_newprimers	3.86276	3.75281	3.9069	3.58172	3.77605	0.14485	4	52.1373	1.554e-05
SiJWC12CAO_pcr_1	-0.801025	-0.636278	-0.781554	-0.628296	-0.711788	0.0922013	4	15.4399	0.000590227		SiJWH10BBG_pcr_1	3.21415	4.03561	3.74079	4.11606	3.77666	0.408228	4	18.5027	0.000344524
SiJWD02ADR_pcr_1	-0.803808	-0.61089	-0.699683	-0.720887	-0.708817	0.0792509	4	17.8879	0.000381001		SiJWF01ADV_pcr_1	3.51639	3.97083	3.75778	3.86969	3.77867	0.195309	4	38.6942	3.79742e-05
SiJWB08ADJ_pcr_1	-0.688122	-0.849301	-0.653801	-0.623507	-0.703683	0.100604	4	13.9892	0.000790968		SiJWG01BCX_pcr_1	3.54589	3.76062	3.83735	4.00338	3.78681	0.1899	4	39.8821	3.46861e-05
SiJWF11ACP_pcr_2	-0.746947	-0.802609	-0.696651	-0.55676	-0.700742	0.105292	4	13.3104	0.000916517		SiJWE08CAP_pcr_1	3.65988	3.95672	3.76743	3.8029	3.79673	0.122774	4	61.8491	9.31242e-06
SiJWD04CAT_pcr_1	-0.601109	-0.796377	-0.647645	-0.754707	-0.699959	0.0909246	4	15.3965	0.000595181		SiJWE12ABM_pcr_2	3.31204	3.74098	3.95889	4.17848	3.7976	0.36971	4	20.5437	0.0002522
SiJWE02ACU_pcr_2	-0.696163	-0.816155	-0.585453	-0.697711	-0.69887	0.0942127	4	14.836	0.000664448		SiJWF06ACG_pcr_2	4.20264	4.08373	3.00494	3.90164	3.79824	0.543156	4	13.9858	0.000791537
SiJWH04BAP_pcr_1	-0.595522	-0.707634	-0.826028	-0.645404	-0.693647	0.099459	4	13.9484	0.000797847		SiJWB06ABU_pcr_2	3.51315	3.82133	3.68624	4.22837	3.81227	0.304729	4	25.0207	0.000139984
SiJWH05ADR_pcr_1	-0.78148	-0.661718	-0.764172	-0.565645	-0.693254	0.100153	4	13.8439	0.00081582		SiJWE05BDX_pcr_1	3.45967	3.94912	3.97791	3.86294	3.81241	0.240176	4	31.7468	6.86785e-05
SiJWC06BAE_pcr_1	-0.659838	-0.641267	-0.611334	-0.841438	-0.688469	0.103918	4	13.2502	0.000928894		SiJWE10BBM_pcr_1	3.34234	3.56921	4.23898	4.11217	3.81568	0.428908	4	17.7925	0.000387118
SiJWD06BEA_pcr_2	-0.602785	-0.608021	-0.756002	-0.764148	-0.682739	0.0893872	4	15.276	0.000609231		SiJWA04BBH_pcr_1	3.43436	3.44851	4.12989	4.27653	3.82232	0.443905	4	17.2213	0.000426602
SiJWE04BAY_pcr_1	-0.738275	-0.801047	-0.594032	-0.595634	-0.682247	0.104141	4	13.1023	0.000960268		SiJWE07ACD_pcr_2	3.58983	3.99125	3.663	4.05166	3.82393	0.231342	4	33.0587	6.08392e-05
SiJWA12BCO_pcr_1	-0.674681	-0.55809	-0.737676	-0.752997	-0.680861	0.0885859	4	15.3718	0.00059803		SiJWE12ADE_pcr_1	3.66141	3.92205	3.95283	3.78484	3.83028	0.134191	4	57.0869	1.18408e-05
SiJWE01AAA_pcr_2	-0.766193	-0.654258	-0.579432	-0.72043	-0.680078	0.0813234	4	16.7253	0.000465362		SiJWH06CAF_pcr_1	3.17716	3.63903	4.21546	4.3465	3.84454	0.540735	4	14.2197	0.000753568
SiJWH04ADI_pcr_1	-0.723741	-0.660519	-0.691902	-0.62583	-0.675498	0.0419832	4	32.1795	6.59517e-05		SiJWA09ABN_pcr_2	3.52743	3.68258	4.04221	4.14653	3.84969	0.292667	4	26.3077	0.000120495
SiJWB12ABJ_pcr_2	-0.745208	-0.65328	-0.635968	-0.667233	-0.675422	0.0482496	4	27.997	0.000100033		SiJWA05BAY_pcr_1	3.32739	3.6761	4.31511	4.10126	3.85496	0.440728	4	17.4936	0.000407143
SiJWA02ABR_pcr_2	-0.630778	-0.664075	-0.66215	-0.742696	-0.674925	0.0476891	4	28.3052	9.68111e-05		SiJWB05AAO_pcr_2	3.79455	4.054	3.86757	3.78072	3.87421	0.125772	4	61.6071	9.42253e-06
SiJWH03BBN_pcr_1	-0.720079	-0.664685	-0.772482	-0.539745	-0.674248	0.0998878	4	13.5001	0.000878915		SiJWD05BBW_pcr_1	4.18759	4.56559	3.40747	3.34973	3.8776	0.59696	4	12.9911	0.000984787
SiJWA02ABH_pcr_2	-0.542791	-0.701023	-0.743813	-0.706277	-0.673476	0.0891824	4	15.1033	0.000630145		SiJWA10BCP_pcr_1	3.52196	3.44303	4.25991	4.29818	3.88077	0.461282	4	16.826	0.000457122
SiJWB09BDW_pcr_2	-0.706963	-0.624974	-0.674526	-0.682622	-0.672271	0.0344128	4	39.0711	3.68877e-05		SiJWE06BDS_pcr_1	3.61998	3.64076	4.26344	4.00382	3.882	0.309402	4	25.0935	0.000138774
SiJWD04BCR_pcr_1	-0.665722	-0.630858	-0.605954	-0.778984	-0.670379	0.0764401	4	17.54	0.000403946		SiJWC11ACL_pcr_2	3.66673	3.99728	4.0061	3.91819	3.89708	0.158568	4	49.1532	1.85425e-05
SiJWG06BBK_pcr_1	-0.676859	-0.635662	-0.643955	-0.72204	-0.669629	0.0392092	4	34.1567	5.51701e-05		SiJWF11BCQ_pcr_1	3.84503	3.90819	3.76506	4.07277	3.89776	0.130545	4	59.7155	1.0346e-05
SiJWF12BDQ_pcr_1	-0.664268	-0.713813	-0.606517	-0.680284	-0.666221	0.0448375	4	29.7171	8.3692e-05		SiJWC12BCD_pcr_1	4.29678	3.94105	3.6798	3.74164	3.91481	0.277973	4	28.1668	9.82401e-05
SiJWF08ABJ_pcr_2	-0.739123	-0.706463	-0.557999	-0.645052	-0.662159	0.0796413	4	16.6286	0.000473458		SiJWD09BDI_pcr_1	3.5969	3.97473	3.81646	4.29791	3.9215	0.294913	4	26.5942	0.000116655
SiJWE09BBA_pcr_1	-0.671181	-0.688596	-0.755073	-0.527635	-0.660621	0.0957437	4	13.7998	0.000823577		SiJWA05BDQ_pcr_1	3.79373	3.35081	4.34451	4.23008	3.92978	0.453103	4	17.3461	0.000417537
SiJWD06BCO_pcr_1	-0.597632	-0.616593	-0.731615	-0.683679	-0.657379	0.061741	4	21.2948	0.000226577		SiJWB08BAB_pcr_1	3.57768	3.46488	4.3419	4.3529	3.93434	0.479202	4	16.4204	0.000491534
SiJWG04BEA_pcr_2	-0.632942	-0.576379	-0.646363	-0.773389	-0.657268	0.0831421	4	15.8107	0.000550043		SiJWG03CAK_pcr_1	3.44525	3.66006	4.19471	4.44093	3.93524	0.461467	4	17.0553	0.000439077
SiJWA08AAL_pcr_2	-0.659471	-0.613162	-0.621795	-0.732799	-0.656807	0.0545057	4	24.1005	0.00015657		SiJWD04BCW_pcr_1	3.47578	3.38493	4.59826	4.32609	3.94627	0.607133	4	12.9997	0.000982875
SiJWH07AAY_pcr_1	-0.681634	-0.66634	-0.577599	-0.689478	-0.653763	0.0516767	4	25.302	0.000135384		SiJWC08ADW_pcr_1	4.01354	4.05928	3.89532	3.8201	3.94706	0.109254	4	72.255	5.84209e-06
SiJWA05ADA_pcr_1	-0.701023	-0.703822	-0.583886	-0.617849	-0.651645	0.0602608	4	21.6275	0.000216332		SiJWA03CAK_pcr_1	3.52442	3.92625	3.96575	4.37532	3.94793	0.347759	4	22.705	0.000187103
SiJWE11ABC_pcr_2	-0.520463	-0.684144	-0.668527	-0.729136	-0.650567	0.0904622	4	14.3832	0.000728449		SiJWD03BCY_pcr_1	3.98018	4.18204	3.66284	3.96814	3.9483	0.214112	4	36.8808	4.38453e-05
SiJWA03BAJ_pcr_2	-0.761194	-0.645152	-0.623605	-0.553988	-0.645985	0.086097	4	15.006	0.00064236		SiJWG04BBO_pcr_1	3.23697	4.31538	4.17881	4.07066	3.95045	0.486084	4	16.2542	0.000506625
SiJWA01BBN_pcr_1	-0.523295	-0.728181	-0.695313	-0.627001	-0.643447	0.0905113	4	14.2181	0.000753823		SiJWD04ACP_pcr_2	3.93841	4.18871	3.55295	4.13303	3.95327	0.287647	4	27.487	0.000105687
SiJWA05CAH_pcr_1	-0.637115	-0.636758	-0.760143	-0.536768	-0.642696	0.0914347	4	14.058	0.000779546		SiJWB01CAG_pcr_1	3.78603	3.71284	4.17241	4.167	3.95957	0.244488	4	32.3907	6.4673e-05
SiJWF03BAP_pcr_1	-0.751118	-0.677924	-0.610078	-0.522868	-0.640497	0.0972963	4	13.1659	0.000946611		SiJWE11ACT_pcr_2	3.65936	3.65063	4.16137	4.38916	3.96513	0.370008	4	21.4326	0.000222255
SiJWB02ABR_pcr_2	-0.626038	-0.707886	-0.524039	-0.68943	-0.636848	0.0829741	4	15.3505	0.00060049		SiJWF01ABN_pcr_2	4.34963	4.34429	3.6537	3.56936	3.97924	0.426002	4	18.6818	0.000334775
SiJWH07BAP_pcr_1	-0.640672	-0.653044	-0.645507	-0.592412	-0.632909	0.0274738	4	46.0737	2.251e-05		SiJWB06BAV_pcr_1	3.64091	3.46987	4.50341	4.32593	3.98503	0.506207	4	15.7447	0.000556929
SiJWG08ABN_pcr_2	-0.659825	-0.639848	-0.596336	-0.624824	-0.630208	0.0267485	4	47.121	2.10437e-05		SiJWC03ABQ_pcr_2	4.19141	4.21483	3.73367	3.81074	3.98767	0.250954	4	31.78	6.84639e-05
SiJWA02BBJ_pcr_1	-0.637123	-0.669642	-0.698663	-0.499489	-0.626229	0.0881537	4	14.2077	0.000755459		SiJWD12BAU_pcr_1	3.60021	3.98461	4.04417	4.32668	3.98892	0.299026	4	26.6794	0.000115545
SiJWE06ADB_pcr_1	-0.644233	-0.519972	-0.652102	-0.686234	-0.625635	0.0727626	4	17.1966	0.00042843		SiJWH04BCF_pcr_1	3.46305	3.65124	4.58482	4.29031	3.99736	0.527957	4	15.1428	0.000625288
SiJWD10BCF_pcr_1	-0.565587	-0.583864	-0.634424	-0.700389	-0.621066	0.060367	4	20.5763	0.000251007		SiJWB08ABY_pcr_2	4.26829	4.04215	3.75553	3.92516	3.99778	0.215331	4	37.1316	4.29642e-05
SiJWC01AAW_pcr_2	-0.542435	-0.680086	-0.662186	-0.577958	-0.615666	0.0660775	4	18.6347	0.000337304		SiJWF10ABM_pcr_2	3.62433	3.55288	4.18914	4.66988	4.00906	0.524479	4	15.2878	0.00060784
SiJWB08BDN_pcr_1	-0.525972	-0.578162	-0.716334	-0.638788	-0.614814	0.0818889	4	15.0158	0.000641112		SiJWC10ADU_pcr_1	3.59802	3.66479	4.48662	4.29729	4.01168	0.446685	4	17.962	0.000376341
SiJWA05ACW_pcr_2	-0.539165	-0.581119	-0.664075	-0.674718	-0.614769	0.0655065	4	18.7697	0.000330125		SiJWA07AAI_pcr_2	4.21437	4.03013	3.89316	3.9297	4.01684	0.14386	4	55.8436	1.26488e-05
SiJWE10ACC_pcr_2	-0.55283	-0.712346	-0.636948	-0.554574	-0.614175	0.0763145	4	16.0959	0.000521584		SiJWH07ADC_pcr_1	3.88031	3.87024	4.0316	4.29867	4.02021	0.199778	4	40.2468	3.37531e-05
SiJWG01BCL_pcr_1	-0.644745	-0.592414	-0.713598	-0.502823	-0.613395	0.0888628	4	13.8054	0.00082258		SiJWA01BCB_pcr_1	4.31584	4.43416	3.68983	3.67448	4.02858	0.402969	4	19.9945	0.000273428
SiJWG08CAD_pcr_1	-0.554043	-0.676802	-0.553949	-0.657002	-0.610449	0.0656853	4	18.5871	0.000339884		SiJWF08ABM_pcr_2	4.60117	4.15723	3.64101	3.77823	4.04441	0.430619	4	18.7841	0.000329369
SiJWH06ADX_pcr_1	-0.591545	-0.58935	-0.719595	-0.518736	-0.604807	0.0836648	4	14.4578	0.000717349		SiJWG10BAD_pcr_1	3.45913	3.74843	4.37281	4.6053	4.04642	0.533097	4	15.1808	0.000620646
SiJWC02ADA_pcr_1	-0.612877	-0.565255	-0.611792	-0.620271	-0.602549	0.0251465	4	47.9232	2.00057e-05		SiJWE06ABK_pcr_2	3.7968	3.76283	4.32712	4.32705	4.05345	0.316272	4	25.6327	0.000130231
SiJWG09BAY_pcr_1	-0.525841	-0.553095	-0.666173	-0.662943	-0.602013	0.0730847	4	16.4744	0.000486757		SiJWH05BAR_pcr_1	3.90618	3.93652	4.17208	4.20417	4.05474	0.155073	4	52.2947	1.54002e-05
SiJWH01CAP_pcr_1	-0.721961	-0.595605	-0.55524	-0.53309	-0.601474	0.0843909	4	14.2545	0.000748127		SiJWB05ADY_pcr_1	3.82428	3.65391	4.3186	4.4245	4.05532	0.374218	4	21.6736	0.000214961
SiJWB07ADY_pcr_newprimers	-0.520573	-0.55225	-0.671999	-0.655398	-0.600055	0.0749256	4	16.0174	0.000529221		SiJWA02AAR_pcr_2	3.77275	3.76423	4.30929	4.40365	4.06248	0.341665	4	23.7805	0.000162949
SiJWG03BAV_pcr_1	-0.5921	-0.554688	-0.68173	-0.570809	-0.599832	0.0567078	4	21.1552	0.000231067		SiJWC01ACI_pcr_2	3.66963	4.20752	4.1483	4.23039	4.06396	0.265154	4	30.6535	7.62725e-05
SiJWH11ADA_pcr_1	-0.578819	-0.673341	-0.574571	-0.570664	-0.599349	0.0494404	4	24.2453	0.000153793		SiJWC04ADV_pcr_1	3.46596	3.59632	4.60458	4.5931	4.06499	0.618751	4	13.1393	0.000952285
SiJWF05ACU_pcr_2	-0.675204	-0.623942	-0.536089	-0.55416	-0.597349	0.0642561	4	18.5927	0.000339576		SiJWD06ADB_pcr_1	4.05239	3.77553	4.26194	4.18588	4.06893	0.213919	4	38.0419	3.99581e-05
SiJWC12BCE_pcr_1	-0.660624	-0.595206	-0.517494	-0.567982	-0.585326	0.0596361	4	19.6299	0.00028885		SiJWC12ABO_pcr_2	3.29949	4.11341	4.47589	4.39439	4.07079	0.537135	4	15.1574	0.000623493
SiJWC06CAA_pcr_1	-0.629836	-0.631376	-0.499253	-0.563644	-0.581027	0.0629988	4	18.4457	0.000347705		SiJWD01ABD_pcr_2	4.44719	4.13769	3.97382	3.78895	4.08691	0.279256	4	29.27	8.75751e-05
SiJWD11BCU_pcr_1	-0.583533	-0.532231	-0.600291	-0.570161	-0.571554	0.0289689	4	39.4598	3.58098e-05		SiJWD07ABY_pcr_2	3.98288	3.96056	4.02184	4.39731	4.09065	0.206006	4	39.7139	3.51279e-05
SiJWF10ABC_pcr_2	-0.535013	-0.673887	-0.533999	-0.517966	-0.565216	0.0728668	4	15.5137	0.000581924		SiJWF11BCZ_pcr_1	3.75458	3.49854	4.7455	4.41477	4.10335	0.576418	4	14.2374	0.000750789
SiJWD12ABY_pcr_2	-0.532029	-0.665184	-0.521535	-0.512235	-0.557746	0.0720806	4	15.4756	0.000586188		SiJWE01CAR_pcr_1	NA	3.99698	4.27602	4.08307	4.11869	0.142888	3	49.9256	0.000400952
SiJWE01ACW_pcr_2	-0.60626	-0.620573	-0.469881	-0.52743	-0.556036	0.0705421	4	15.7647	0.000554831		SiJWD02BCT_pcr_1	4.08851	3.75116	4.25204	4.38527	4.11924	0.273764	4	30.0934	8.05998e-05
SiJWF03BDV_pcr_1	-0.498734	-0.603172	-0.475794	-0.645083	-0.555696	0.0813901	4	13.6551	0.000849693		SiJWD02BCG_pcr_1	3.73041	3.5523	4.40054	4.80173	4.12125	0.582385	4	14.153	0.000764143
SiJWA02AAQ_pcr_2	-0.53942	-0.507391	-0.592347	-0.576157	-0.553829	0.0380624	4	29.1011	8.91044e-05		SiJWA12AA1_pcr_1	3.84749	4.03108	4.28258	4.37167	4.1332	0.238917	4	34.5996	5.30829e-05
SiJWD06BBY_pcr_1	-0.632261	-0.532803	-0.563686	-0.484682	-0.553358	0.0618364	4	17.8975	0.000380395		SiJWE06ABL_pcr_2	3.72982	4.26295	4.45131	4.09846	4.13564	0.306553	4	26.9815	0.000111719
SiJWG09ABI_pcr_2	-0.592642	-0.458286	-0.638142	-0.52385	-0.55323	0.0788263	4	14.0367	0.000783067		SiJWA06AAP_pcr_2	3.85939	4.27769	4.28195	4.12474	4.13594	0.198338	4	41.706	3.03373e-05
SiJWE11ACD_pcr_2	-0.516974	-0.489169	-0.542875	-0.654804	-0.550956	0.0726224	4	15.1731	0.000621576		SiJWE10ADG_pcr_1	3.95383	4.03967	4.12714	4.4435	4.14103	0.213698	4	38.756	3.77932e-05
SiJWG11ACY_pcr_1	-0.535392	-0.645348	-0.482712	-0.53635	-0.549951	0.0683587	4	16.0901	0.000522137		SiJWB06BDF_pcr_1	4.10588	3.46694	4.30687	4.69089	4.14265	0.511689	4	16.192	0.00051243
SiJWG01BAH_pcr_2	-0.568896	-0.506178	-0.476082	-0.637756	-0.547228	0.0716745	4	15.2698	0.000609966		SiJWB01BBP_pcr_1	3.28609	4.35828	4.35492	4.60521	4.15112	0.588479	4	14.108	0.000771395
SiJWD01ACB_pcr_2	-0.468105	-0.533153	-0.637033	-0.549013	-0.546826	0.0695843	4	15.7169	0.000559854		SiJWD06AAP_pcr_2	4.23889	4.37719	3.87147	4.12407	4.1529	0.214269	4	38.7634	3.77715e-05
SiJWE01AAA_pcr_1	-0.532733	-0.631966	-0.473588	-0.534994	-0.54332	0.0655799	4	16.5697	0.000478475		SiJWA08BAC_pcr_1	4.26887	4.18734	4.00144	4.17001	4.15692	0.112254	4	74.0627	5.42484e-06
SiJWA05BDF_pcr_1	-0.494037	-0.579412	-0.507124	-0.567754	-0.537082	0.042751	4	25.1261	0.000138238		SiJWH03BBG_pcr_1	3.80833	3.97882	4.31243	4.53109	4.15767	0.325275	4	25.564	0.000131279
SiJWC06ABU_pcr_2	-0.48492	-0.54231	-0.496713	-0.622506	-0.536612	0.0623812	4	17.2043	0.000427862		SiJWD09AAO_pcr_2	3.95977	4.18611	4.09805	4.39427	4.15955	0.182111	4	45.6814	2.30942e-05
SiJWE06CAD_pcr_1	-0.634272	-0.487742	-0.516415	-0.487293	-0.53143	0.0699016	4	15.2051	0.000617706		SiJWC06ADN_pcr_1	3.86247	4.29639	4.22659	4.28484	4.16757	0.205684	4	40.524	3.3066e-05
SiJWE02BCR_pcr_1	-0.492707	-0.542956	-0.59756	-0.481074	-0.528574	0.0532563	4	19.8502	0.000279397		SiJWB05ADY_pcr_newprimers	4.17707	3.66621	4.40885	4.51743	4.19239	0.37842	4	22.1573	0.000201254
SiJWD07BBZ_pcr_1	-0.594764	-0.51015	-0.455972	-0.552457	-0.528336	0.0593348	4	17.8086	0.000386074		SiJWE02ABP_pcr_2	4.42714	4.15603	4.03224	4.15464	4.19251	0.166839	4	50.2583	1.73472e-05
SiJWD08ABS_pcr_2	-0.430567	-0.49945	-0.547889	-0.60062	-0.519631	0.0723358	4	14.3672	0.000730855		SiJWA11BCD_pcr_1	3.91399	4.18512	4.38765	4.28572	4.19312	0.20363	4	41.1838	3.15044e-05
SiJWB03ABY_pcr_2	-0.442481	-0.559474	-0.51703	-0.554891	-0.518469	0.0541118	4	19.1629	0.000310346		SiJWG05BCU_pcr_1	4.15001	3.68414	4.26684	4.68279	4.19594	0.410733	4	20.4315	0.000256353
SiJWH02BDU_pcr_1	-0.516838	-0.565295	-0.419926	-0.556397	-0.514614	0.0665461	4	15.4664	0.000587226		SiJWE02ACV_pcr_2	4.31415	4.37671	3.76709	4.33098	4.19723	0.287975	4	29.15	8.86583e-05
SiJWA07BBG_pcr_1	-0.566346	-0.530456	-0.478173	-0.480517	-0.513873	0.0424873	4	24.1895	0.000154855		SiJWH11AAG_pcr_2	4.13752	3.9018	4.33336	4.43469	4.20184	0.235001	4	35.7603	4.80892e-05
SiJWB05CAB_pcr_1	-0.546851	-0.444306	-0.524663	-0.508906	-0.506181	0.0440891	4	22.9618	0.000180925		SiJWH04ABO_pcr_2	4.30155	4.11327	4.32651	4.08912	4.20761	0.123693	4	68.0329	6.99803e-06
SiJWC09ADL_pcr_1	-0.542746	-0.483069	-0.454828	-0.537805	-0.504612	0.0428116	4	23.5736	0.000167258		SiJWD02AAG_pcr_2	4.29035	4.09397	4.34114	4.13431	4.21494	0.119369	4	70.6202	6.25706e-06
SiJWD02BBP_pcr_1	-0.41573	-0.483056	-0.572202	-0.520321	-0.497827	0.0658174	4	15.1275	0.000627156		SiJWF05BBA_pcr_1	4.22219	4.07801	4.43007	4.1496	4.21997	0.151937	4	55.5491	1.28509e-05
SiJWH12ACA_pcr_2	-0.496181	-0.481734	-0.495052	-0.515215	-0.497045	0.0137756	4	72.1629	5.86446e-06		SiJWB05ACQ_pcr_2	4.19407	4.24657	4.31957	4.12182	4.22051	0.0835246	4	101.06	2.13588e-06
SiJWA07BBQ_pcr_1	-0.417649	-0.579758	-0.497345	-0.479729	-0.49362	0.0668287	4	14.7727	0.000672935		SiJWC04ADU_pcr_1	3.70529	3.82728	4.71097	4.63969	4.22081	0.527996	4	15.988	0.000532113
SiJWC03ABF_pcr_2	-0.532101	-0.505821	-0.393707	-0.517446	-0.487269	0.0632943	4	15.3969	0.000595132		SiJWF03ABG_pcr_2	3.92396	3.74632	4.6693	4.56496	4.22614	0.459248	4	18.4046	0.000350023
SiJWA09BAC_pcr_1	-0.489675	-0.426729	-0.455445	-0.572895	-0.486186	0.0632741	4	15.3676	0.000598509		SiJWE10ADN_pcr_1	4.2421	3.83922	4.49994	4.3241	4.22634	0.279597	4	30.2317	7.95016e-05
SiJWH05AAJ_pcr_2	-0.515025	-0.450638	-0.491951	-0.48321	-0.485206	0.0266682	4	36.3884	4.56459e-05		SiJWE05BBM_pcr_1	3.84327	4.05824	4.58818	4.44181	4.23288	0.342627	4	24.7083	0.00014534
SiJWF07BCD_pcr_1	-0.494142	-0.492842	-0.517913	-0.413566	-0.479616	0.0455166	4	21.0743	0.000233723		SiJWB10CAC_pcr_1	3.88988	4.14138	4.4341	4.48126	4.23666	0.275768	4	30.7262	7.57336e-05
SiJWG07BBW_pcr_1	-0.452353	-0.521736	-0.511075	-0.426758	-0.47798	0.0457905	4	20.8769	0.000240381		SiJWE09BDQ_pcr_1	3.85388	4.06526	4.72955	4.35793	4.25166	0.379758	4	22.3914	0.000195037
SiJWF06ADY_pcr_1	-0.476136	-0.47108	-0.516443	-0.446103	-0.477441	0.0291281	4	32.7821	6.23887e-05		SiJWD03BCG_pcr_1	4.39854	4.25956	3.90363	4.52383	4.27139	0.26788	4	31.8903	6.77577e-05
SiJWG06ACB_pcr_2	-0.432102	-0.39721	-0.529244	-0.520709	-0.469816	0.0653601	4	14.3762	0.000729494		SiJWE08BBV_pcr_1	3.77619	4.55167	4.37622	4.383	4.27177	0.340209	4	25.1127	0.000138458
SiJWE02BBY_pcr_1	-0.513517	-0.470532	-0.364324	-0.519172	-0.466886	0.0717416	4	13.0158	0.000979285		SiJWD04ABZ_pcr_2	4.02978	4.13039	4.50145	4.4483	4.27748	0.232617	4	36.777	4.42166e-05
SiJWG10BDM_pcr_1	-0.4086	-0.47503	-0.451751	-0.513187	-0.462142	0.0437661	4	21.1187	0.00023226		SiJWF02ACL_pcr_2	4.42459	4.29051	4.10873	4.29865	4.28062	0.129996	4	65.8578	7.71415e-06
SiJWG07ACW_pcr_2	-0.454939	-0.43808	-0.485395	-0.446586	-0.45625	0.0206129	4	44.2684	2.53742e-05		SiJWC06BBG_pcr_1	4.05056	3.55802	4.59458	4.9267	4.28247	0.603065	4	14.2023	0.000756298
SiJWH04BCK_pcr_1	-0.401432	-0.466393	-0.484228	-0.472319	-0.456093	0.037188	4	24.5291	0.000148537		SiJWH09AAO_pcr_2	4.02107	3.99625	4.45707	4.6969	4.29282	0.342568	4	25.0626	0.000139286
SiJWH01BDC_pcr_1	-0.526195	-0.41196	-0.464982	-0.414998	-0.454534	0.0536039	4	16.959	0.00044654		SiJWH12BBB_pcr_1	4.0726	4.22693	4.58839	4.31646	4.3011	0.2164	4	39.7514	3.50288e-05
SiJWC12ADR_pcr_1	-0.401871	-0.484198	-0.430991	-0.444369	-0.440357	0.0341909	4	25.7587	0.000128335		SiJWF02ADQ_pcr_1	4.52923	4.85596	3.66057	4.17301	4.30469	0.51204	4	16.8139	0.000458103
SiJWG04ACX_pcr_1	-0.467683	-0.412144	-0.421067	-0.431641	-0.433134	0.0243726	4	35.5428	4.89757e-05		SiJWE11ADS_pcr_1	3.69992	4.69896	4.33675	4.51452	4.31254	0.434363	4	19.8569	0.000279118
SiJWA05ABY_pcr_2	-0.428214	-0.441046	-0.355385	-0.462405	-0.421762	0.0464443	4	18.1621	0.00036413		SiJWH09ABY_pcr_2	3.72433	3.864	4.64996	5.03497	4.31832	0.627908	4	13.7546	0.000831615
SiJWF10CAG_pcr_1	-0.339632	-0.493161	-0.419599	-0.399054	-0.412861	0.0633684	4	13.0305	0.000976009		SiJWB10BAT_pcr_1	4.06027	4.31868	4.33217	4.58577	4.32422	0.214609	4	40.2985	3.36233e-05
SiJWG03AAP_pcr_2	-0.470711	-0.368094	-0.440112	-0.353293	-0.408052	0.0564186	4	14.4652	0.000716273		SiJWH12BAH_pcr_2	4.80361	4.28882	3.92115	4.30873	4.33058	0.362219	4	23.9114	0.000160299
SiJWF06BEA_pcr_2	-0.405615	-0.387797	-0.389976	-0.446129	-0.407379	0.0270245	4	30.1489	8.01565e-05		SiJWF04ABV_pcr_2	4.23317	4.14611	4.52074	4.47489	4.34373	0.1824	4	47.6286	2.03788e-05
SiJWC11BDL_pcr_1	-0.417835	-0.349518	-0.359517	-0.479297	-0.401542	0.0599553	4	13.3947	0.000899551		SiJWB06AAC_pcr_1	3.95712	3.93954	4.25357	5.22811	4.34459	0.60638	4	14.3296	0.000736558
SiJWG07BAY_pcr_1	-0.357859	-0.473453	-0.34681	-0.428019	-0.401535	0.0599336	4	13.3993	0.000898629		SiJWD09ADW_pcr_1	4.11518	4.25209	4.67921	4.34687	4.34834	0.24021	4	36.2045	4.63439e-05
SiJWA12BBY_pcr_1	-0.392556	-0.469833	-0.413996	-0.32198	-0.399591	0.0611403	4	13.0713	0.000967034		SiJWE10CAT_pcr_1	3.89228	3.67635	4.79847	5.03547	4.35064	0.666908	4	13.0472	0.00097232
SiJWC01ABG_pcr_2	-0.34548	-0.408775	-0.447741	-0.385772	-0.396942	0.0427926	4	18.5519	0.000341808		SiJWD02ADQ_pcr_1	4.08383	4.61933	3.93332	4.76885	4.35133	0.405147	4	21.4803	0.000220787
SiJWF06BEA_pcr_1	-0.430927	-0.345357	-0.376836	-0.426601	-0.394931	0.0411651	4	19.1877	0.000309154		SiJWB09AAC_pcr_1	4.39765	4.04688	4.64903	4.3127	4.35157	0.248299	4	35.051	5.10622e-05
SiJWF03ACU_pcr_2	-0.3956	-0.399735	-0.31953	-0.454627	-0.392373	0.0555166	4	14.1353	0.000766976		SiJWF10BAA_pcr_2	4.13548	4.09189	4.24021	4.94776	4.35384	0.400812	4	21.7251	0.000213444
SiJWE08ACJ_pcr_2	-0.395347	-0.444808	-0.314719	-0.407362	-0.390559	0.0547724	4	14.2612	0.000747086		SiJWF01BDW_pcr_2	4.57651	4.24684	4.12743	4.46917	4.35499	0.204602	4	42.5704	2.85289e-05
SiJWA09AAR_pcr_2	-0.382854	-0.384738	-0.38675	-0.367999	-0.380586	0.0085402	4	89.128	3.11338e-06		SiJWE04BCA_pcr_1	3.66539	3.92692	4.98385	4.86024	4.3591	0.660675	4	13.1959	0.000940259
SiJWD10ADA_pcr_1	-0.400456	-0.386935	-0.366472	-0.354474	-0.377084	0.0205516	4	36.6964	4.45082e-05		SiJWG03BCY_pcr_1	3.98503	3.80656	4.95555	4.69687	4.361	0.552281	4	15.7927	0.000551911
SiJWF09ADY_pcr_1	-0.336675	-0.413146	-0.373396	-0.3427	-0.366479	0.035021	4	20.9291	0.000238595		SiJWF10BCK_pcr_1	4.0453	4.07745	4.48669	4.85621	4.36641	0.383399	4	22.7774	0.000185334
SiJWG05ADJ_pcr_1	-0.401956	-0.361319	-0.302846	-0.337778	-0.350975	0.0416201	4	16.8656	0.000453934		SiJWC05ACB_pcr_2	4.18361	4.43369	4.51032	4.36388	4.37287	0.139633	4	62.6338	8.96699e-06
SiJWA08BCM_pcr_1	-0.369357	-0.293558	-0.375929	-0.310181	-0.337256	0.0415078	4	16.2503	0.00050699		SiJWH04CAR_pcr_1	4.20964	4.59582	4.24343	4.45221	4.37527	0.182004	4	48.0788	1.98122e-05
SiJWC08ADX_pcr_1	-0.389408	-0.347529	-0.315384	-0.276071	-0.332098	0.0481004	4	13.8085	0.000822033		SiJWG01ABT_pcr_2	3.93408	4.25307	4.68804	4.70155	4.39418	0.37078	4	23.7024	0.000164557
SiJWH05AAE_pcr_2	-0.268806	-0.310121	-0.349908	-0.306454	-0.308822	0.033149	4	18.6323	0.000337429		SiJWE04ADU_pcr_1	4.25828	4.30297	4.26716	4.77045	4.39971	0.247912	4	35.4941	4.91771e-05
SiJWC10ACO_pcr_2	-0.242654	-0.312651	-0.338813	-0.271521	-0.29141	0.0427044	4	13.6478	0.000851048		SiJWE12ACS_pcr_2	4.49705	4.25644	4.40913	4.44904	4.40292	0.104056	4	84.6256	3.63703e-06
SiJWF01ABW_pcr_2	-0.294507	-0.297691	-0.313474	-0.241382	-0.286764	0.0313704	4	18.2824	0.000357034		SiJWG12ACO_pcr_2	3.85634	4.05195	4.73093	5.0004	4.40991	0.543542	4	16.2266	0.000509196
SiJWD02AAH_pcr_2	-0.270902	-0.31849	-0.248495	-0.269364	-0.276812	0.0296046	4	18.7006	0.000333771		SiJWG11ABH_pcr_2	3.90757	4.38898	4.37957	4.98926	4.41635	0.443166	4	19.9309	0.000276039
SiJWD03BAX_pcr_1	-0.276446	-0.281826	-0.212221	-0.265235	-0.258932	0.0318984	4	16.2348	0.00050843		SiJWF08BCE_pcr_1	3.96806	4.27113	4.76256	4.67206	4.41845	0.368459	4	23.9834	0.000158865
SiJWF09ADN_pcr_1	-0.227261	-0.268959	-0.265352	-0.242908	-0.25112	0.0196422	4	25.5694	0.000131197		SiJWC07BCC_pcr_1	3.68776	4.28995	4.76551	4.94068	4.42098	0.560823	4	15.766	0.000554689
SiJWH07BAT_pcr_1	-0.229527	-0.214938	-0.26425	-0.279929	-0.247161	0.0300834	4	16.4317	0.000490525		SiJWD01BCM_pcr_1	4.80677	3.91913	4.29858	4.66077	4.42131	0.397143	4	22.2656	0.000198345
SiJWC12ACM_pcr_2	-0.203922	-0.270546	-0.234332	-0.244511	-0.238327	0.0275438	4	17.3053	0.000420471		SiJWA03BDG_pcr_1	3.81349	4.48758	4.47094	4.91631	4.42208	0.455092	4	19.4338	0.000297629
SiJWH01ABS_pcr_2	-0.246579	-0.266627	-0.238375	-0.192831	-0.236103	0.0311937	4	15.1378	0.000625889		SiJWG08BAR_pcr_1	4.2393	4.05005	4.68651	4.7281	4.42599	0.334329	4	26.4769	0.000118207
SiJWH11ADJ_pcr_1	-0.183982	-0.243596	-0.174917	-0.210221	-0.203179	0.0308241	4	13.1831	0.000942957		SiJWB10ABS_pcr_2	4.18043	4.16853	4.38318	4.99317	4.43133	0.387294	4	22.8835	0.000182778
SiJWF10CAN_pcr_1	-0.169605	-0.176558	-0.200946	-0.161267	-0.177094	0.0170856	4	20.7302	0.000245491		SiJWF06AAZ_pcr_1	4.45039	3.84954	4.66233	4.86387	4.45653	0.438465	4	20.3279	0.00026027
SiJWF10ABE_pcr_2	-0.148649	-0.141349	-0.11881	-0.11553	-0.131084	0.0163961	4	15.9897	0.000531944		SiJWF05ADW_pcr_1	4.78597	4.77869	4.12989	4.20487	4.47485	0.356369	4	25.1136	0.000138443
SiJWD11ACV_pcr_2	-0.127163	-0.130488	-0.139036	-0.105175	-0.125465	0.0144219	4	17.3993	0.000413749		SiJWF08ACZ_pcr_1	4.20927	4.0575	4.76381	4.88778	4.47959	0.407689	4	21.9755	0.000206264
											SiJWA05BDN_pcr_1	4.3595	4.18542	4.64265	4.74936	4.48423	0.258355	4	34.7138	5.25617e-05
											SiJWA05ACA_pcr_2	4.52826	4.08875	4.69927	4.67581	4.49802	0.283153	4	31.7709	6.85226e-05
											SiJWH11BAG_pcr_2	3.98015	3.95648	4.97579	5.11028	4.50567	0.622986	4	14.4648	0.000716331
											SiJWG07BAQ_pcr_1	4.56225	4.74881	4.31443	4.41212	4.5094	0.189375	4	47.6241	2.03846e-05
											SiJWF12BDY_pcr_1	4.0111	4.17069	4.45667	5.40892	4.51184	0.625811	4	14.4192	0.00072307
											SiJWF06CAP_pcr_1	4.26564	4.2904	4.58101	4.91124	4.51207	0.302191	4	29.8624	8.24794e-05
											SiJWA10BAJ_pcr_2	4.61168	4.84373	4.10191	4.54344	4.52519	0.310079	4	29.1873	8.83197e-05
											SiJWB07BAM_pcr_1	NA	4.7254	4.40021	4.45982	4.52848	0.173125	3	45.3057	0.00048683
											SiJWH09AAC_pcr_1	4.20751	4.215	4.82267	4.89464	4.53496	0.374943	4	24.1901	0.000154843
											SiJWA02AAX_pcr_2	4.47657	4.55109	4.52893	4.58791	4.53612	0.0465627	4	194.839	2.98125e-07
											SiJWF04BDM_pcr_1	4.47987	4.22519	4.66116	4.79643	4.54066	0.247085	4	36.7538	4.43005e-05
											SiJWF08BBG_pcr_1	4.23668	4.30766	4.406	5.21353	4.54097	0.45372	4	20.0166	0.000272527
											SiJWB07BBN_pcr_1	4.6255	4.19502	4.33238	5.01506	4.54199	0.362903	4	25.0314	0.000139806
											SiJWG01AAW_pcr_2	4.23179	4.59635	4.68021	4.66527	4.5434	0.21093	4	43.0797	2.75303e-05
											SiJWB09AAC_pcr_2	4.69171	4.37002	4.53694	4.60572	4.5511	0.136314	4	66.7736	7.40126e-06
											SiJWA02BCN_pcr_1	3.95209	4.28496	5.05199	4.9266	4.55391	0.523291	4	17.4049	0.000413352
											SiJWG08ADS_pcr_1	4.43133	4.58295	4.56777	4.67485	4.56422	0.100434	4	90.8899	2.93586e-06
											SiJWE10BAJ_pcr_2	4.52885	4.91923	4.34704	4.47652	4.56791	0.246366	4	37.0822	4.31357e-05
											SiJWH09AAC_pcr_2	4.30302	4.19824	4.72172	5.0551	4.56952	0.394895	4	23.143	0.000176727
											SiJWF04CAH_pcr_1	4.64217	4.3651	4.56011	4.72786	4.57381	0.155083	4	58.9854	1.07347e-05
											SiJWG02ADS_pcr_1	4.46041	4.4041	4.76832	4.71107	4.58598	0.180501	4	50.8137	1.6785e-05
											SiJWC07AAS_pcr_2	4.30463	4.22774	5.06305	4.7578	4.5883	0.393526	4	23.3189	0.000172774
											SiJWD08BBE_pcr_1	4.55714	4.31273	4.70733	4.78682	4.591	0.208533	4	44.0314	2.57856e-05
											SiJWE05CAM_pcr_1	4.023	4.26979	4.88185	5.19066	4.59133	0.538512	4	17.0519	0.000439341
											SiJWF07BCN_pcr_1	4.42647	4.30355	4.73088	4.90876	4.59242	0.277027	4	33.155	6.03117e-05
											SiJWD07BDM_pcr_1	4.8033	4.60772	4.50945	4.48191	4.60059	0.145525	4	63.2273	8.71696e-06
											SiJWC05BDC_pcr_1	4.47354	4.67191	4.77547	4.5095	4.60761	0.141318	4	65.2092	7.94651e-06
											SiJWC05BCB_pcr_1	4.1597	3.9747	5.12382	5.18193	4.61004	0.631797	4	14.5934	0.000697761
											SiJWB05ABG_pcr_2	4.03585	4.10338	5.13305	5.2131	4.62135	0.638518	4	14.4752	0.000714798
											SiJWB03ADF_pcr_1	4.43372	4.46947	4.51318	5.07314	4.62238	0.30226	4	30.5855	7.67815e-05
											SiJWB05ACB_pcr_2	4.21058	4.37824	5.04665	4.87204	4.62688	0.396417	4	23.3435	0.000172231
											SiJWH06ABM_pcr_2	4.18979	4.07405	5.00824	5.23815	4.62756	0.581877	4	15.9056	0.000540348
											SiJWA04ACJ_pcr_2	4.74941	4.49786	4.71986	4.63288	4.65	0.112844	4	82.4143	3.9376e-06
											SiJWB11BAT_pcr_1	4.12892	4.52047	4.71479	5.23654	4.65018	0.460626	4	20.1907	0.000265579
											SiJWA06AAS_pcr_2	4.93496	4.80932	4.64052	4.23634	4.65529	0.304235	4	30.6032	7.66486e-05
											SiJWH05BAN_pcr_1	4.37347	4.80107	4.5859	4.94007	4.67513	0.248339	4	37.6511	4.12131e-05
											SiJWF10BCO_pcr_1	4.76316	4.3719	4.84002	4.88302	4.71452	0.233738	4	40.3403	3.35192e-05
											SiJWH07BDX_pcr_1	4.37067	4.37146	4.78823	5.33093	4.71532	0.455089	4	20.7227	0.000245756
											SiJWD01ADD_pcr_1	4.17479	4.31987	5.04195	5.4061	4.73568	0.586164	4	16.1582	0.000515627
											SiJWE08BEA_pcr_1	4.67047	4.42839	5.28282	4.56884	4.73763	0.376769	4	25.1488	0.000137865
											SiJWH02BDQ_pcr_1	4.49014	4.66412	4.62168	5.19767	4.7434	0.311773	4	30.4286	7.79721e-05
											SiJWC01CAM_pcr_1	4.81082	5.20167	4.54222	4.42597	4.74517	0.344373	4	27.5583	0.000104871
											SiJWA10AAT_pcr_2	4.6831	4.60234	4.8692	4.82617	4.7452	0.124095	4	76.477	4.92733e-06
											SiJWF10ADB_pcr_1	4.64075	4.88039	4.53619	4.93168	4.74725	0.18941	4	50.1268	1.7484e-05
											SiJWH07BCU_pcr_1	5.24233	4.25641	4.77605	4.72527	4.75002	0.403037	4	23.5711	0.00016731
											SiJWD04AAJ_pcr_2	4.62065	4.86628	4.77879	4.7657	4.75786	0.101783	4	93.4901	2.69771e-06
											SiJWH08AAH_pcr_2	4.26049	4.25156	5.14422	5.38345	4.75993	0.590012	4	16.135	0.000517832
											SiJWB07ABZ_pcr_2	4.31354	4.74163	4.82876	5.23021	4.77853	0.375992	4	25.4183	0.000133542
											SiJWA10BCA_pcr_1	4.24043	4.08698	5.43202	5.39482	4.78856	0.724395	4	13.2209	0.000935014
											SiJWA11ACZ_pcr_1	4.8992	4.999	4.72915	4.57867	4.8015	0.185685	4	51.7166	1.5922e-05
											SiJWG10ABN_pcr_2	4.36511	4.20585	5.24258	5.39689	4.80261	0.603952	4	15.904	0.000540515
											SiJWE07ACV_pcr_2	4.59892	4.71339	4.93879	4.96156	4.80316	0.176314	4	54.4843	1.36185e-05
											SiJWA07AAM_pcr_2	4.50407	4.84024	4.55435	5.32746	4.80653	0.377526	4	25.4633	0.000132837
											SiJWH08BAL_pcr_1	4.94796	4.52071	4.82716	4.93382	4.80741	0.198594	4	48.4146	1.94033e-05
											SiJWA04ACG_pcr_2	4.27315	4.40623	5.53822	5.03612	4.81343	0.586695	4	16.4086	0.000492581
											SiJWA02BAU_pcr_1	4.32818	4.41607	5.00564	5.58661	4.83413	0.584922	4	16.5291	0.00048198
											SiJWG07ACR_pcr_2	4.82729	4.82915	4.62428	5.06091	4.83541	0.17845	4	54.1933	1.38389e-05
											SiJWD03BEA_pcr_2	4.18479	4.32049	5.22211	5.62603	4.83836	0.698338	4	13.8568	0.000813583
											SiJWC05ADT_pcr_1	4.15485	4.30978	5.41965	5.47259	4.83922	0.703973	4	13.7483	0.000832748
											SiJWE06ACB_pcr_2	4.85094	4.76653	4.76018	4.98109	4.83968	0.102946	4	94.024	2.65203e-06
											SiJWF03BBV_pcr_1	4.50107	4.0741	5.24525	5.57879	4.8498	0.685843	4	14.1426	0.000765809
											SiJWH06BCM_pcr_1	4.15397	4.59361	5.23082	5.49529	4.86842	0.608351	4	16.0053	0.000530406
											SiJWC01ACL_pcr_2	4.51794	4.31443	5.48318	5.19223	4.87695	0.551434	4	17.6882	0.000393951
											SiJWG06ACS_pcr_1	4.68939	4.3444	5.39363	5.10784	4.88381	0.46147	4	21.1664	0.000230703
											SiJWA09BBL_pcr_1	4.77993	4.33793	5.00865	5.43614	4.89067	0.457981	4	21.3575	0.000224596
											SiJWB06ADA_pcr_1	5.41908	5.18773	4.69906	4.26062	4.89163	0.516766	4	18.9317	0.000321778
											SiJWE08AAU_pcr_2	4.29857	4.37362	5.36125	5.55474	4.89705	0.653248	4	14.9929	0.000644023
											SiJWF05BAH_pcr_2	4.64091	4.90152	4.75189	5.29755	4.89797	0.286994	4	34.1329	5.52854e-05
											SiJWD03ABI_pcr_2	4.581	4.96516	4.87148	5.19653	4.90354	0.254753	4	38.4964	3.85617e-05
											SiJWD12ADH_pcr_1	4.76669	4.42353	5.13798	5.30366	4.90796	0.393326	4	24.9562	0.000141069
											SiJWH03ACU_pcr_2	4.51016	4.75719	5.00145	5.37357	4.91059	0.368096	4	26.6811	0.000115523
											SiJWA02BDE_pcr_1	4.9469	4.53954	5.3072	4.85976	4.91335	0.315618	4	31.1348	7.27986e-05
											SiJWE12BBA_pcr_1	4.61657	4.88575	5.11241	5.09121	4.92649	0.230512	4	42.7438	2.81836e-05
											SiJWG11BAB_pcr_1	4.72002	4.74771	5.15027	5.16513	4.94578	0.245038	4	40.3675	3.34517e-05
											SiJWC01BCY_pcr_1	4.80281	4.50701	5.02511	5.47323	4.95204	0.407145	4	24.3257	0.000152279
											SiJWH07BBS_pcr_1	4.60888	5.18176	4.93324	5.09782	4.95542	0.253038	4	39.1674	3.66167e-05
											SiJWD08AAV_pcr_2	5.10153	4.92803	4.663	5.14219	4.95869	0.217906	4	45.5122	2.33525e-05
											SiJWG09ADF_pcr_1	4.52785	4.87774	5.44465	5.0195	4.96743	0.379352	4	26.189	0.000122134
											SiJWF04BAB_pcr_1	4.43756	4.5853	5.21404	5.63398	4.96772	0.557342	4	17.8265	0.000384925
											SiJWB04BAH_pcr_2	4.84978	5.65881	4.8505	4.54672	4.97645	0.476864	4	20.8716	0.000240561
											SiJWF05ADI_pcr_1	4.73698	4.93132	5.12193	5.15626	4.98662	0.193622	4	51.5089	1.61152e-05
											SiJWH09ABR_pcr_2	4.85017	4.89979	4.76108	5.44763	4.98967	0.310653	4	32.1237	6.62948e-05
											SiJWD08ABV_pcr_2	5.13142	5.31346	4.76548	4.75978	4.99254	0.275687	4	36.2189	4.62888e-05
											SiJWA06ABK_pcr_2	4.88688	4.61763	5.46305	5.02318	4.99768	0.353051	4	28.3114	9.67477e-05
											SiJWB12CAU_pcr_1	4.72882	5.05567	5.16424	5.09177	5.01012	0.192892	4	51.9475	1.57108e-05
											SiJWG06CAC_pcr_1	4.68234	4.60423	5.54096	5.34057	5.04202	0.468723	4	21.5139	0.000219759
											SiJWA12BCZ_pcr_1	4.58665	4.665	5.42839	5.48861	5.04216	0.482435	4	20.9029	0.000239487
											SiJWD06BBS_pcr_1	4.56873	4.60056	4.98334	6.0732	5.05646	0.703524	4	14.3747	0.000729732
											SiJWF01ACQ_pcr_2	5.47522	5.26365	4.66551	4.82244	5.0567	0.376782	4	26.8415	0.000113471
											SiJWG09BCT_pcr_1	4.62435	4.30495	5.74527	5.56766	5.06056	0.704083	4	14.3749	0.000729697
											SiJWC09ACU_pcr_2	5.03157	5.00127	5.01714	5.21322	5.0658	0.0990565	4	102.281	2.06032e-06
											SiJWE08BAQ_pcr_1	4.85074	4.86065	5.23311	5.34699	5.07287	0.25508	4	39.7748	3.49671e-05
											SiJWC06ACT_pcr_2	4.70581	4.83399	5.30203	5.46481	5.07666	0.364172	4	27.8805	0.000101288
											SiJWA04ACS_pcr_1	4.63776	4.50705	5.82743	5.36827	5.08513	0.623296	4	16.3169	0.000500861
											SiJWE04AAC_pcr_1	4.92296	4.47259	5.41022	5.53632	5.08552	0.486747	4	20.896	0.000239726
											SiJWF03AAJ_pcr_2	5.45105	5.44546	4.73977	4.7389	5.09379	0.409304	4	24.89	0.000142192
											SiJWA06ABJ_pcr_2	5.12846	4.70778	5.03165	5.56605	5.10849	0.354137	4	28.8503	9.14415e-05
											SiJWG06ACS_pcr_2	4.99639	5.42578	5.09422	4.93972	5.11403	0.217411	4	47.0447	2.11462e-05
											SiJWG11BCN_pcr_1	4.70673	4.66395	5.48917	5.65136	5.1278	0.515479	4	19.8953	0.000277514
											SiJWD08AAI_pcr_2	5.02894	4.67529	5.36827	5.45858	5.13277	0.356689	4	28.7801	9.21107e-05
											SiJWG01BBR_pcr_1	5.09364	4.2602	5.37359	5.81573	5.13579	0.655055	4	15.6805	0.000563729
											SiJWG02AAR_pcr_2	5.29437	5.02921	5.08301	5.15191	5.13962	0.114735	4	89.5911	3.06536e-06
											SiJWG10BCS_pcr_1	4.52453	4.69692	5.54913	5.79035	5.14023	0.623289	4	16.4939	0.000485048
											SiJWB04BAG_pcr_2	4.49877	4.44667	5.87188	5.75328	5.14265	0.775375	4	13.2649	0.00092585
											SiJWA08ADI_pcr_1	4.813	5.22271	5.38661	5.14961	5.14298	0.241277	4	42.6313	2.84069e-05
											SiJWA07CAP_pcr_1	4.71353	4.62714	5.43603	5.82777	5.15111	0.578812	4	17.7989	0.000386701
											SiJWH04ABW_pcr_2	5.38062	5.46293	4.98984	4.81001	5.16085	0.311921	4	33.0907	6.06632e-05
											SiJWC08BCG_pcr_1	5.03468	4.81857	5.2757	5.57086	5.17495	0.323303	4	32.0131	6.69832e-05
											SiJWH12BAQ_pcr_1	4.8445	4.91714	5.39702	5.56009	5.17969	0.352715	4	29.3704	8.66829e-05
											SiJWC10BBA_pcr_1	4.4729	5.46573	5.31973	5.51914	5.19437	0.488311	4	21.2749	0.00022721
											SiJWA03ABE_pcr_2	5.09448	5.29856	5.22044	5.18116	5.19866	0.0848785	4	122.496	1.19949e-06
											SiJWB11ACT_pcr_2	5.17013	5.09866	5.1614	5.37981	5.2025	0.122419	4	84.995	3.58983e-06
											SiJWC01BAE_pcr_1	4.58628	5.09913	5.21811	5.91526	5.2047	0.547315	4	19.019	0.000317396
											SiJWE08BEA_pcr_2	5.19823	4.9673	5.05432	5.60443	5.20607	0.282132	4	36.9052	4.37582e-05
											SiJWG05BDS_pcr_1	5.06824	5.08169	5.21962	5.53783	5.22684	0.218317	4	47.8831	2.00559e-05
											SiJWA11BCF_pcr_1	4.44871	4.75229	5.64531	6.07618	5.23062	0.758755	4	13.7874	0.000825774
											SiJWH12ADF_pcr_1	5.32547	5.19965	5.18736	5.22115	5.23341	0.0629464	4	166.281	4.79606e-07
											SiJWH12ACS_pcr_1	5.23852	4.91693	5.18347	5.65219	5.24778	0.303989	4	34.5261	5.3422e-05
											SiJWE04BDJ_pcr_1	4.67746	5.1246	5.91751	5.31148	5.25776	0.514015	4	20.4576	0.000255377
											SiJWB05BAX_pcr_1	4.93542	5.65852	5.16322	5.28742	5.26114	0.302371	4	34.7992	5.21762e-05
											SiJWF02BAX_pcr_1	5.17435	4.59107	5.51969	5.79707	5.27054	0.519693	4	20.2833	0.000261981
											SiJWB05BCA_pcr_1	4.75106	4.66466	5.67182	5.99613	5.27091	0.664443	4	15.8657	0.000544403
											SiJWE03ACJ_pcr_2	4.79225	4.67432	5.61656	6.02621	5.27734	0.651871	4	16.1913	0.000512496
											SiJWE01BDJ_pcr_1	4.6516	5.2344	5.52719	5.69697	5.27754	0.458949	4	22.9984	0.000180066
											SiJWG05BAZ_pcr_1	5.36385	5.28819	5.08988	5.3736	5.27888	0.131658	4	80.191	4.27416e-06
											SiJWG05ACX_pcr_1	4.86374	5.08179	5.68659	5.54752	5.29491	0.386673	4	27.3871	0.000106845
											SiJWD01ACY_pcr_1	5.54054	5.34091	5.254	5.09864	5.30852	0.184305	4	57.6058	1.1524e-05
											SiJWA06BAJ_pcr_2	5.48887	5.16166	5.19737	5.3904	5.30957	0.156151	4	68.0058	7.0064e-06
											SiJWB12ADH_pcr_1	5.12188	5.42746	5.00097	5.7305	5.3202	0.327155	4	32.524	6.38824e-05
											SiJWF11CAJ_pcr_1	4.62964	4.7911	5.58725	6.28451	5.32313	0.765505	4	13.9075	0.000804823
											SiJWC12BCG_pcr_1	4.98423	4.95109	5.6417	5.71711	5.32353	0.412301	4	25.8235	0.000127375
											SiJWB10BAM_pcr_1	5.25746	4.4743	5.66644	5.93349	5.33292	0.636354	4	16.7609	0.000462428
											SiJWF02ABI_pcr_2	5.25479	4.94184	5.12691	6.03022	5.33844	0.478746	4	22.3018	0.000197387
											SiJWA02AAX_pcr_1	5.72106	5.37209	5.09844	5.16338	5.33874	0.28034	4	38.0876	3.98146e-05
											SiJWC08ACI_pcr_2	4.83333	4.87029	5.75173	5.96712	5.35562	0.58855	4	18.1994	0.000361911
											SiJWA04ACS_pcr_2	4.55173	4.88757	6.20687	5.77879	5.35624	0.767899	4	13.9504	0.000797512
											SiJWC10ABA_pcr_2	5.21318	5.23767	5.13754	5.85346	5.36046	0.331419	4	32.3486	6.49252e-05
											SiJWB06BBG_pcr_1	5.04875	5.69247	4.96625	5.74153	5.36225	0.411496	4	26.0622	0.000123919
											SiJWD01ACX_pcr_1	5.46759	5.59997	5.10729	5.28715	5.3655	0.214637	4	49.996	1.76214e-05
											SiJWH03BAG_pcr_2	5.36786	5.51309	5.19171	5.42426	5.37423	0.135569	4	79.2839	4.42248e-06
											SiJWG07CAK_pcr_1	5.72009	5.27094	4.8996	5.60977	5.3751	0.370151	4	29.0428	8.96411e-05
											SiJWG07BBV_pcr_1	4.47276	6.10334	5.13192	5.8193	5.38183	0.730483	4	14.735	0.000678057
											SiJWF12BAS_pcr_1	4.61067	5.26519	5.55497	6.10023	5.38276	0.620313	4	17.355	0.0004169
											SiJWB07CAS_pcr_1	5.99639	5.34096	5.22762	4.99449	5.38987	0.429305	4	25.1097	0.000138507
											SiJWA02BAB_pcr_1	4.54591	5.11439	5.91836	5.99004	5.39217	0.689839	4	15.6331	0.000568817
											SiJWH12ACS_pcr_2	5.6483	5.62349	5.04007	5.29349	5.40133	0.290108	4	37.2367	4.26021e-05
											SiJWE03ADX_pcr_1	4.98051	4.78844	5.94604	5.91161	5.40665	0.608197	4	17.7793	0.000387976
											SiJWE11ADD_pcr_1	4.93959	4.90944	5.95141	5.8754	5.41896	0.571909	4	18.9504	0.000320832
											SiJWF03ACA_pcr_2	5.17616	5.41781	5.45098	5.63487	5.41996	0.188495	4	57.5077	1.1583e-05
											SiJWD10BAE_pcr_1	4.99769	5.25461	5.58177	5.90439	5.43462	0.393977	4	27.5885	0.000104529
											SiJWD01BAH_pcr_2	5.38008	5.2641	5.36686	5.73114	5.43554	0.203766	4	53.3508	1.45044e-05
											SiJWG07ABG_pcr_2	5.24975	4.94133	5.6493	5.90409	5.43611	0.425829	4	25.5319	0.000131773
											SiJWE11BBJ_pcr_1	4.42188	5.83899	5.29119	6.2014	5.43837	0.774084	4	14.0511	0.000780687
											SiJWD07ADP_pcr_1	4.98877	4.99644	5.88289	5.93038	5.44962	0.528081	4	20.6393	0.000248728
											SiJWE05BDY_pcr_1	5.10101	5.1517	5.75449	5.80362	5.45271	0.377937	4	28.8551	9.1396e-05
											SiJWG03BDI_pcr_1	5.4274	5.08164	5.56909	5.73447	5.45315	0.27765	4	39.2807	3.63012e-05
											SiJWH03ADR_pcr_1	4.75171	5.15056	5.66624	6.26445	5.45824	0.655001	4	16.6664	0.000470271
											SiJWE09ACK_pcr_2	5.13536	4.98127	5.94285	5.83078	5.47257	0.484618	4	22.5851	0.000190085
											SiJWA09ACN_pcr_2	5.25494	5.39401	5.65394	5.62199	5.48122	0.190135	4	57.6562	1.14938e-05
											SiJWA06ACY_pcr_1	5.31477	5.47277	5.40114	5.75897	5.48691	0.192532	4	56.9973	1.18967e-05
											SiJWD02BAN_pcr_1	5.70279	5.14099	5.6394	5.47025	5.48836	0.25152	4	43.6415	2.64821e-05
											SiJWB02ACN_pcr_2	5.42304	5.38822	5.48628	5.6781	5.49391	0.129327	4	84.9613	3.5941e-06
											SiJWE11ABP_pcr_2	5.42298	5.48779	5.53345	5.54305	5.49681	0.0548102	4	200.576	2.73271e-07
											SiJWG06ABL_pcr_2	5.34494	5.38381	5.68882	5.62032	5.50947	0.170605	4	64.5873	8.17814e-06
											SiJWC11BBE_pcr_1	4.74474	5.09689	6.07114	6.18747	5.52506	0.71396	4	15.4772	0.000586008
											SiJWA11BAV_pcr_1	5.0649	5.38822	5.1956	6.47481	5.53088	0.643148	4	17.1994	0.000428224
											SiJWG04BCG_pcr_1	4.85692	4.88217	6.26016	6.1596	5.53971	0.775001	4	14.296	0.000741699
											SiJWD04BBF_pcr_1	5.54553	5.14081	5.35917	6.14034	5.54646	0.429079	4	25.8529	0.000126943
											SiJWH01BDL_pcr_1	5.07458	5.50548	5.61473	6.05721	5.563	0.403643	4	27.564	0.000104807
											SiJWB04ACE_pcr_2	5.74239	5.74908	5.61485	5.17614	5.57062	0.270138	4	41.2428	3.13696e-05
											SiJWE11BCI_pcr_1	5.21012	5.10954	6.19052	5.78965	5.57496	0.508179	4	21.9409	0.000207237
											SiJWB04ACX_pcr_1	4.90457	5.00385	5.76861	6.63721	5.57856	0.80445	4	13.8693	0.000811415
											SiJWF09ABB_pcr_2	5.41837	5.78363	5.51237	5.66681	5.59529	0.162035	4	69.0627	6.68978e-06
											SiJWD01ADP_pcr_1	5.35911	5.65759	5.25297	6.1475	5.60429	0.400606	4	27.9791	0.000100225
											SiJWC01ACG_pcr_2	5.08004	5.10118	6.13327	6.14085	5.61384	0.604241	4	18.5814	0.000340191
											SiJWH05ABU_pcr_2	4.95671	4.87564	6.36132	6.35335	5.63675	0.83272	4	13.5382	0.000871618
											SiJWE12ABP_pcr_2	4.93445	5.28403	6.18257	6.15097	5.638	0.627155	4	17.9796	0.000375244
											SiJWC01BAY_pcr_1	5.69219	6.01687	5.30355	5.56036	5.64324	0.296792	4	38.0283	4.0001e-05
											SiJWC02BAL_pcr_1	5.24127	5.35139	6.06508	5.91556	5.64333	0.407785	4	27.678	0.000103521
											SiJWC09ABV_pcr_2	5.36915	5.28753	6.02594	5.91085	5.64837	0.373995	4	30.2056	7.97075e-05
											SiJWH11BAD_pcr_1	5.33086	5.65321	5.69469	5.92356	5.65058	0.24406	4	46.3049	2.21749e-05
											SiJWC06BAF_pcr_1	4.94589	5.13996	5.89237	6.63266	5.65272	0.770332	4	14.6761	0.00068617
											SiJWF02ABF_pcr_2	5.24385	5.15624	5.71893	6.50654	5.65639	0.618332	4	18.2956	0.000356268
											SiJWE03ADY_pcr_newprimers	5.24985	5.24879	6.08962	6.05221	5.66012	0.474592	4	23.8526	0.000161482
											SiJWF06BDW_pcr_2	5.08426	5.24164	5.96015	6.42126	5.67683	0.625829	4	18.1418	0.000365343
											SiJWF11BCG_pcr_1	5.91812	6.2493	5.18539	5.50381	5.71416	0.466126	4	24.5177	0.000148744
											SiJWF11BDV_pcr_1	5.5618	5.43879	5.61067	6.25728	5.71714	0.367287	4	31.1317	7.28198e-05
											SiJWC03ABT_pcr_2	5.12629	5.02268	6.31522	6.47661	5.7352	0.766935	4	14.9561	0.000648733
											SiJWD04BCS_pcr_1	5.18833	5.25308	6.2209	6.28428	5.73664	0.596907	4	19.2212	0.000307547
											SiJWE02BDM_pcr_1	5.01763	5.06234	6.28914	6.5852	5.73858	0.815875	4	14.0673	0.000778028
											SiJWE06ACE_pcr_2	5.45947	5.83112	5.89685	5.78554	5.74325	0.194623	4	59.0191	1.07163e-05
											SiJWF03ABP_pcr_2	5.4154	5.30308	5.91828	6.33672	5.74337	0.477521	4	24.0549	0.000157457
											SiJWB08AAD_pcr_2	5.60871	5.3626	5.68343	6.49852	5.78831	0.492914	4	23.4861	0.000169126
											SiJWE03ADY_pcr_1	5.83799	4.88826	6.37489	6.07956	5.79517	0.643241	4	18.0187	0.000372827
											SiJWG11CAT_pcr_1	5.02528	5.1018	6.55218	6.50973	5.79725	0.847966	4	13.6733	0.00084635
											SiJWF06ACI_pcr_2	5.7407	5.88646	5.78351	5.81144	5.80553	0.0612987	4	189.418	3.24464e-07
											SiJWF10BCT_pcr_1	5.44721	5.56503	6.2409	5.98204	5.8088	0.368281	4	31.5455	6.99987e-05
											SiJWE05ABN_pcr_2	5.54481	5.33172	6.57578	5.80586	5.81454	0.543274	4	21.4056	0.000223094
											SiJWA07ABI_pcr_2	5.69553	5.46851	5.91922	6.22168	5.82623	0.321492	4	36.2449	4.61892e-05
											SiJWH07ADB_pcr_1	5.24358	5.55949	5.94878	6.59102	5.83572	0.580284	4	20.1133	0.000268638
											SiJWF09BAP_pcr_1	4.9656	5.31204	6.48222	6.62904	5.84723	0.832293	4	14.0509	0.000780721
											SiJWD12CAM_pcr_1	5.57263	5.7888	5.71604	6.44359	5.88027	0.386141	4	30.4566	7.77577e-05
											SiJWB01BCK_pcr_1	5.44972	5.41951	6.04784	6.66601	5.89577	0.5894	4	20.006	0.000272959
											SiJWD07CAE_pcr_1	5.8644	5.5005	5.82137	6.4863	5.91814	0.412104	4	28.7216	9.26728e-05
											SiJWH07ACL_pcr_2	5.58859	5.68499	6.45934	6.01655	5.93737	0.393302	4	30.1924	7.98112e-05
											SiJWD04CAJ_pcr_1	5.86662	5.27771	6.13396	6.47881	5.93928	0.507264	4	23.4169	0.000170623
											SiJWB07ADZ_pcr_1	5.88332	5.80836	6.02181	6.0624	5.94397	0.118539	4	100.287	2.18563e-06
											SiJWF07ABU_pcr_2	4.85337	5.65876	6.56701	6.70838	5.94688	0.864724	4	13.7544	0.000831652
											SiJWH07AAE_pcr_2	5.14645	5.566	6.78257	6.29739	5.94811	0.73189	4	16.2541	0.000506636
											SiJWH05BDK_pcr_1	5.20998	5.50201	6.50404	6.60281	5.95471	0.702699	4	16.9481	0.000447395
											SiJWH02AAS_pcr_2	5.297	5.35989	6.25354	6.99	5.97511	0.805367	4	14.8382	0.000664155
											SiJWH06ACJ_pcr_2	5.56316	5.70633	6.17627	6.4685	5.97857	0.418645	4	28.5615	9.4235e-05
											SiJWH02BDN_pcr_1	5.17013	5.28516	6.59145	6.87224	5.97975	0.87724	4	13.6331	0.000853766
											SiJWD02BBF_pcr_1	5.1043	6.28498	6.10624	6.45664	5.98804	0.606279	4	19.7534	0.000283499
											SiJWC03BCX_pcr_1	5.69342	6.08277	6.00855	6.26657	6.01283	0.238966	4	50.3236	1.72798e-05
											SiJWB04BAN_pcr_1	6.31457	4.81801	6.56811	6.35357	6.01356	0.804796	4	14.9443	0.000650257
											SiJWB04ABZ_pcr_2	5.48735	5.16944	6.87796	6.55977	6.02363	0.823518	4	14.629	0.000692735
											SiJWC06BDL_pcr_1	6.63432	5.33024	6.06359	6.11611	6.03606	0.536426	4	22.5047	0.000192119
											SiJWB03ADE_pcr_1	5.29529	5.3963	6.20334	7.25827	6.0383	0.909172	4	13.2831	0.000922113
											SiJWB01ACQ_pcr_2	6.12631	6.16936	5.62154	6.2472	6.0411	0.284148	4	42.5209	2.86286e-05
											SiJWF01ADI_pcr_1	6.09997	6.07428	6.07007	5.94385	6.04704	0.0700512	4	172.646	4.28496e-07
											SiJWA06ADW_pcr_1	5.87528	5.77663	6.27464	6.31639	6.06074	0.274605	4	44.1414	2.55935e-05
											SiJWE05BCB_pcr_1	5.28295	5.30427	6.57549	7.10423	6.06673	0.918496	4	13.2101	0.00093726
											SiJWH08AAF_pcr_2	5.80371	5.69294	6.096	6.75002	6.08567	0.474413	4	25.6556	0.000129884
											SiJWF11BAB_pcr_1	5.63091	6.2272	6.0899	6.4652	6.1033	0.351026	4	34.774	5.22895e-05
											SiJWE05ACK_pcr_2	5.97822	6.09845	6.0675	6.30918	6.11334	0.140161	4	87.233	3.32065e-06
											SiJWD01AAS_pcr_2	6.54682	5.97719	5.82413	6.12553	6.11842	0.310983	4	39.3489	3.61131e-05
											SiJWE11ACF_pcr_2	5.38874	5.84464	7.22814	6.05438	6.12897	0.783693	4	15.6413	0.000567939
											SiJWC09BDQ_pcr_1	5.55834	5.80455	6.67721	6.5713	6.15285	0.555223	4	22.1635	0.000201085
											SiJWD10ACN_pcr_2	6.14882	5.62706	6.25757	6.59053	6.15599	0.399564	4	30.8135	7.50935e-05
											SiJWD12ABO_pcr_2	5.32511	5.76026	6.40965	7.18913	6.17104	0.811946	4	15.2006	0.000618248
											SiJWH12BDR_pcr_1	5.59005	5.43226	6.43365	7.24771	6.17592	0.838936	4	14.7232	0.000679667
											SiJWD09BAT_pcr_1	5.80645	5.75784	6.39347	6.74607	6.17596	0.477385	4	25.8741	0.000126632
											SiJWG01ADC_pcr_1	5.77464	5.82284	6.45517	6.65876	6.17785	0.446019	4	27.7022	0.000103251
											SiJWC01BBI_pcr_1	5.35717	6.6932	6.11977	6.60085	6.19275	0.611148	4	20.266	0.000262649
											SiJWD11BDT_pcr_1	5.31421	5.87697	6.27167	7.36996	6.2082	0.868459	4	14.2971	0.000741539
											SiJWB09AAF_pcr_2	5.87521	5.45386	6.67392	6.83861	6.2104	0.656811	4	18.9108	0.000322841
											SiJWB01ADS_pcr_1	5.98037	5.53811	6.17199	7.21833	6.2272	0.712076	4	17.4903	0.000407375
											SiJWB04BDX_pcr_1	5.66351	5.69685	6.60854	6.96678	6.23392	0.656058	4	19.0042	0.000318135
											SiJWF10ADA_pcr_1	5.78349	5.57331	6.72711	6.91734	6.25031	0.670451	4	18.6451	0.000336742
											SiJWG07ACQ_pcr_2	7.18058	6.32532	5.82459	5.67328	6.25094	0.679518	4	18.3982	0.000350386
											SiJWD04BAL_pcr_1	5.35057	6.07762	6.6998	6.95464	6.27066	0.715502	4	17.528	0.00040477
											SiJWC02BCF_pcr_1	5.65949	5.71036	6.66521	7.1162	6.28781	0.720391	4	17.4567	0.000409712
											SiJWH07AAO_pcr_2	6.95134	6.70636	5.44947	6.0851	6.29807	0.673037	4	18.7154	0.000332989
											SiJWE08ACI_pcr_2	6.54237	6.8327	5.5679	6.27669	6.30492	0.541272	4	23.2967	0.000173267
											SiJWE01BBI_pcr_1	6.14068	6.508	5.78605	6.79471	6.30736	0.438678	4	28.7562	9.23398e-05
											SiJWB06CAQ_pcr_1	5.33318	6.20986	6.78679	6.94737	6.3193	0.729708	4	17.3201	0.000419404
											SiJWC05BCT_pcr_1	6.05221	6.21893	6.34631	6.70893	6.33159	0.278894	4	45.4051	2.3518e-05
											SiJWA04ADH_pcr_1	5.73085	5.52018	7.04494	7.07198	6.34199	0.831844	4	15.248	0.000612557
											SiJWC01ABZ_pcr_2	6.1591	6.27392	6.48718	6.45368	6.34347	0.15452	4	82.1053	3.98221e-06
											SiJWF05BAL_pcr_1	5.61148	5.8737	6.71358	7.25228	6.36276	0.75673	4	16.8165	0.000457894
											SiJWG08BCZ_pcr_1	6.08033	5.84095	6.62603	6.97564	6.38074	0.515006	4	24.7793	0.0001441
											SiJWD12AAO_pcr_2	5.97573	5.87915	6.41478	7.26069	6.38259	0.630102	4	20.2589	0.000262922
											SiJWD09ABC_pcr_2	6.51053	6.21822	6.02182	6.79793	6.38713	0.33959	4	37.6167	4.1326e-05
											SiJWG11BBJ_pcr_1	5.70277	6.05947	6.6645	7.1452	6.39298	0.639575	4	19.9914	0.000273556
											SiJWG02ABP_pcr_2	6.14548	5.88282	7.06789	6.57079	6.41674	0.518453	4	24.7534	0.000144551
											SiJWG07ACE_pcr_2	6.3779	6.09727	5.86743	7.3621	6.42617	0.657943	4	19.5341	0.000293093
											SiJWF01AAB_pcr_1	6.17084	5.64433	6.86007	7.02993	6.42629	0.640118	4	20.0785	0.000270032
											SiJWD03BAP_pcr_1	6.28849	6.18345	6.27675	7.08175	6.45761	0.41874	4	30.843	7.48788e-05
											SiJWD04BAM_pcr_1	6.27343	6.05633	6.91176	6.83968	6.5203	0.420896	4	30.983	7.38712e-05
											SiJWF03ABH_pcr_2	6.16305	5.93613	6.69092	7.29766	6.52194	0.606156	4	21.519	0.000219602
											SiJWF01AAB_pcr_2	6.43552	6.36412	6.44132	7.18935	6.60758	0.389432	4	33.9345	5.6259e-05
											SiJWC07BEA_pcr_2	5.92436	6.29637	6.54201	7.7103	6.61826	0.771034	4	17.1672	0.000430616
											SiJWH04BCC_pcr_1	5.59581	5.93502	7.52597	7.43268	6.62237	0.999895	4	13.2461	0.000929745
											SiJWG08AEA_pcr_1	6.29338	6.23297	6.78819	7.27697	6.64788	0.487601	4	27.2677	0.00010825
											SiJWF05BAN_pcr_1	5.99306	6.04311	7.12468	7.4822	6.66076	0.756595	4	17.6072	0.000399373
											SiJWD12CAR_pcr_1	6.11172	5.97701	6.93607	7.71537	6.68504	0.807175	4	16.5641	0.000478963
											SiJWG03BAS_pcr_1	5.95774	6.21768	7.07866	7.49769	6.68794	0.721731	4	18.5331	0.000342843
											SiJWF04AAS_pcr_2	5.89317	5.83436	7.44619	7.63919	6.70323	0.972822	4	13.781	0.00082691
											SiJWG01ADB_pcr_1	6.60122	6.37883	6.80025	7.08659	6.71672	0.300715	4	44.6717	2.4694e-05
											SiJWG08BDN_pcr_1	6.35676	6.27103	6.80813	7.43993	6.71896	0.53528	4	25.1045	0.000138593
											SiJWA04AAB_pcr_1	6.41313	5.91208	7.33556	7.62464	6.82135	0.796473	4	17.1289	0.00043349
											SiJWC10CAK_pcr_1	5.94549	6.15709	7.42859	7.80714	6.83458	0.921627	4	14.8316	0.000665042
											SiJWC09ADG_pcr_1	6.4214	6.33215	7.11659	7.47168	6.83546	0.550329	4	24.8414	0.000143027
											SiJWG03ADX_pcr_1	6.56995	5.6171	7.44631	7.91829	6.88791	1.01482	4	13.5747	0.000864689
											SiJWG01ABX_pcr_2	6.29288	6.02118	7.38392	7.95108	6.91227	0.909075	4	15.2073	0.000617445
											SiJWA04AAB_pcr_2	6.40222	6.48154	7.42511	7.36284	6.91793	0.551232	4	25.0999	0.000138669
											SiJWH12BCM_pcr_1	6.47741	6.58781	7.02066	7.58795	6.91846	0.504155	4	27.4458	0.000106163
											SiJWF10CAH_pcr_1	7.57556	7.4133	6.2249	6.49827	6.92801	0.666801	4	20.7798	0.000243744
											SiJWF11AAC_pcr_2	6.88886	6.76602	6.99057	7.15284	6.94957	0.163685	4	84.9143	3.60008e-06
											SiJWA07BDO_pcr_1	6.04859	6.00203	7.86711	7.88448	6.95055	1.06857	4	13.0091	0.000980774
											SiJWD08ACQ_pcr_2	6.53295	6.43253	7.63131	7.55618	7.03824	0.643479	4	21.8756	0.00020909
											SiJWD10ABG_pcr_2	6.62808	6.57566	7.89922	7.2992	7.10054	0.626115	4	22.6813	0.000187689
											SiJWG02ABG_pcr_2	6.43809	6.50977	7.70259	8.11409	7.19114	0.845532	4	17.0097	0.000442589
											SiJWG01CAF_pcr_1	6.9387	7.8734	7.15647	7.19365	7.29056	0.404505	4	36.0468	4.69537e-05
											SiJWB01CAE_pcr_1	6.4175	6.37644	7.9563	8.43744	7.29692	1.05771	4	13.7976	0.00082396
											SiJWF11AAC_pcr_1	7.31554	7.15556	7.47137	7.87501	7.45437	0.308646	4	48.3036	1.95372e-05
											SiJWC04ADI_pcr_1	6.35615	6.69751	8.2458	8.64732	7.4867	1.12905	4	13.262	0.00092646
											SiJWG12ADB_pcr_1	6.73735	6.94443	7.77119	8.50151	7.48862	0.809596	4	18.4996	0.000344692
											SiJWC01CAJ_pcr_1	6.28792	8.99096	7.35677	8.19916	7.7087	1.15862	4	13.3067	0.000917281
